# Supplementary material for: Cdc7 activates replication checkpoint by phosphorylating the Chk1-binding domain of Claspin in human cells
Source: eLife. 2019 Dec 31;8:e50796. doi: 10.7554/eLife.50796 (PMC6996922; doi:10.7554/eLife.50796)
Supplement: Figure 1—source data 1. [file elife-50796-fig1-data1.xlsx]

## Sheet: 工作表1
wt	4262	4187	4291	4246.67	53.6687
323	4235	4255	4217	4235.67	19.0088
wt+HU	442	445	439	442	3
323+HU	349	330	331	336.667	10.6927
wt	4246.67	53.6687
323	4235.67	19.0088
wt+HU	442	3
323+HU	336.667	10.6927
