# Supplementary material for: Cdc7 activates replication checkpoint by phosphorylating the Chk1-binding domain of Claspin in human cells
Source: eLife. 2019 Dec 31;8:e50796. doi: 10.7554/eLife.50796 (PMC6996922; doi:10.7554/eLife.50796)
Supplement: Figure 4—source data 1. [file elife-50796-fig4-data1.xlsx]

## Sheet: hu sicdc7
Contrib	Conf	Sequence	Modifications	Cleavages	∆Mass	Prec MW	z	Sc	Spectrum	Type
0	99	GSEQTTGAENEVETNALPVVSK	Cation:Na(E)@11		0.0003	2281.07	3	15	1.1.1.1369.18	Winner
0	99	GSEQTTGAENEVETNALPVVSK	Cation:Na(E)@11; Deamidated(N)@15		0.0017	2282.05	3	11	1.1.1.1335.19	Winner
0	99	GSEQTTGAENEVETNALPVVSK	Cation:Na(E)@9		0.0003	2281.07	3	20	1.1.1.1374.19	Winner
0	99	GSEQTTGAENEVETNALPVVSK	Cation:Na(E)@9		0.0003	2281.07	3	17	1.1.1.1379.18	Winner
0	< 1	QPSKLDEDDSCSLLTK	Cys->Dha(C)@11	missed K-L@4	-0.0038	1743.85	3	6	1.1.1.1208.13	Winner
2	99	ETQIITGSDESCR	Cys->Dha(C)@12		0.0017	1403.65	2	18	1.1.1.1023.21	Winner
2	99	ETQIITGSDESCRK	Cys->Dha(C)@12	missed R-K@13	0.0017	1531.75	2	15	1.1.1.923.19	Winner
0	99	ETQIITGSDESCR	Cys->Dha(C)@12		0.0017	1403.65	2	11	1.1.1.1017.21	Winner
0	99	ETQIITGSDESCR	Cys->Dha(C)@12		0.0017	1403.65	2	10	1.1.1.1029.19	Winner
0	99	ETQIITGSDESCRK	Cys->Dha(C)@12	missed R-K@13	0.0017	1531.75	2	13	1.1.1.918.21	Winner
0	99	ETQIITGSDESCRK	Cys->Dha(C)@12	missed R-K@13	0.0027	1531.75	3	13	1.1.1.919.14	Winner
0	99	ETQIITGSDESCRK	Cys->Dha(C)@12	missed R-K@13	0.0017	1531.75	2	15	1.1.1.919.21	Winner
0	99	ETQIITGSDESCRK	Cys->Dha(C)@12	missed R-K@13	0.0017	1531.75	2	15	1.1.1.920.21	Winner
0	99	ETQIITGSDESCRK	Cys->Dha(C)@12	missed R-K@13	0.0027	1531.75	3	15	1.1.1.921.11	Winner
0	99	ETQIITGSDESCRK	Cys->Dha(C)@12	missed R-K@13	0.0017	1531.75	2	14	1.1.1.924.21	Winner
0	94.1	ETQIITGSDESCRK	Cys->Dha(C)@12	missed R-K@13	0.0017	1531.75	2	8	1.1.1.927.21	Winner
0	91.5	ETQIITGSDESCRK	Cys->Dha(C)@12	missed R-K@13	0.0027	1531.75	3	11	1.1.1.926.10	Winner
0	44.6	ETQIITGSDESCRK	Cys->Dha(C)@12	missed R-K@13	0.0027	1531.75	3	9	1.1.1.915.14	Winner
0	< 1	ETQIITGSDESCRK	Cys->Dha(C)@12	missed R-K@13	0.0016	1531.75	3	7	1.1.1.931.9	Winner
0	96.4	PTCHGNAMALLK	Cys->Dha(C)@3; Oxidation(M)@8	cleaved R-P@N-term	-0.0012	1236.63	3	10	1.1.1.955.3	Winner
0	< 1	GSDESCRKDLVKNEELEIQEK	Cys->Dha(C)@6	cleaved T-G@N-term; missed R-K@7; missed K-D@8; missed K-N@12	0.0167	2414.21	3	9	1.1.1.1295.19	Winner
0	47.5	KPRPTCHGNAMALLK	Cys->Dha(C)@6; Oxidation(M)@11		-0.0022	1617.88	3	7	1.1.1.876.13	Winner
0	17.9	KPRPTCHGNAMALLK	Cys->Dha(C)@6; Oxidation(M)@11		0.0005	1617.88	4	9	1.1.1.843.4	Winner
0	< 1	KPRPTCHGNAMALLK	Cys->Dha(C)@6; Oxidation(M)@11		0.0008	1617.88	4	7	1.1.1.876.3	Winner
0	< 1	LDEDDSCSLLTK	Cys->Dha(C)@7		0.0009	1303.62	2	6	1.1.1.1259.15	Winner
0	< 1	LDEDDSCSLLTK	Cys->Dha(C)@7		0.0009	1303.62	2	6	1.1.1.1264.19	Winner
0	99	NASRPMVIQESK	Deamidated(N)@1		0.0004	1359.68	3	14	1.1.1.1027.7	Winner
0	64.9	NASRPMVIQESK	Deamidated(N)@1		0.0004	1359.68	3	9	1.1.1.1021.6	Winner
0	30.3	NASRPMVIQESK	Deamidated(N)@1		-0.0056	1359.68	3	9	1.1.1.987.10	Winner
0	< 1	NASRPMVIQESK	Deamidated(N)@1		-0.0056	1359.68	3	7	1.1.1.992.8	Winner
0	< 1	NEELEIQEK	Deamidated(N)@1		-0.0068	1131.52	2	5	1.1.1.1132.18	Winner
0	< 1	NEELEIQEK	Deamidated(N)@1		-0.009	1131.52	2	7	1.1.1.1138.8	Winner
0	99	NFVFHTLSPVK	Deamidated(N)@1		0.0088	1288.69	2	17	1.1.1.1568.7	Winner
0	< 1	NFVFHTLSPVK	Deamidated(N)@1		0.0234	1288.7	3	11	1.1.1.1563.3	Winner
0	< 1	NPFEAIRPGSAQQVK	Deamidated(N)@1		0.0038	1641.85	3	8	1.1.1.1263.13	Winner
0	99	NQYQALKPR	Deamidated(N)@1		0.0029	1117.59	2	12	1.1.1.1007.9	Winner
0	97.6	NQYQALKPR	Deamidated(N)@1		-0.0017	1117.59	2	8	1.1.1.950.17	Winner
0	90.4	NQYQALKPR	Deamidated(N)@1		0.0029	1117.59	2	9	1.1.1.1001.15	Winner
0	85.3	NQYQALKPR	Deamidated(N)@1		-0.0017	1117.59	2	8	1.1.1.956.16	Winner
0	72.1	NASRPMVIQESK	Deamidated(N)@1; Deamidated(R)@4; Oxidation(P)@5; Oxidation(M)@6		0.0108	1392.67	2	10	1.1.1.933.19	Winner
0	99	NASRPMVIQESK	Deamidated(N)@1; Oxidation(M)@6		0.0009	1375.68	3	14	1.1.1.898.10	Winner
0	99	NASRPMVIQESK	Deamidated(N)@1; Oxidation(M)@6		0.0018	1375.68	3	14	1.1.1.927.9	Winner
0	99	NASRPMVIQESK	Deamidated(N)@1; Oxidation(M)@6		0.0013	1375.68	2	12	1.1.1.928.17	Winner
0	99	NASRPMVIQESK	Deamidated(N)@1; Oxidation(M)@6		0.0018	1375.68	3	15	1.1.1.932.8	Winner
0	68.1	NASRPMVIQESK	Deamidated(N)@1; Oxidation(M)@6		0.0009	1375.68	3	10	1.1.1.892.7	Winner
0	< 1	NASRPMVIQESK	Deamidated(N)@1; Oxidation(M)@6		0.0013	1375.68	2	8	1.1.1.922.20	Winner
0	99	GSEQTTGAENEVETNALPVVSK	Deamidated(N)@10		0.0024	2260.07	3	18	1.1.1.1318.18	Winner
0	99	GSEQTTGAENEVETNALPVVSK	Deamidated(N)@10		0.0049	2260.08	2	10	1.1.1.1321.21	Winner
0	99	GSEQTTGAENEVETNALPVVSK	Deamidated(N)@10		0.0024	2260.07	3	24	1.1.1.1323.20	Winner
0	99	GSEQTTGAENEVETNALPVVSK	Deamidated(N)@10		0.0049	2260.08	2	14	1.1.1.1324.21	Winner
0	99	GSEQTTGAENEVETNALPVVSK	Deamidated(N)@10		0.0049	2260.08	2	13	1.1.1.1325.21	Winner
0	99	GSEQTTGAENEVETNALPVVSK	Deamidated(N)@10		0.0049	2260.08	2	15	1.1.1.1326.21	Winner
0	99	GSEQTTGAENEVETNALPVVSK	Deamidated(N)@10		0.0049	2260.08	2	10	1.1.1.1327.21	Winner
0	99	GSEQTTGAENEVETNALPVVSK	Deamidated(N)@10		0.0049	2260.08	2	18	1.1.1.1328.19	Winner
0	99	GSEQTTGAENEVETNALPVVSK	Deamidated(N)@10		0.0024	2260.07	3	23	1.1.1.1329.19	Winner
0	99	GSEQTTGAENEVETNALPVVSK	Deamidated(N)@10		0.0024	2260.07	3	14	1.1.1.1348.21	Winner
0	99	GSEQTTGAENEVETNALPVVSK	Deamidated(N)@10		0.0061	2260.08	3	12	1.1.1.1396.19	Winner
0	31.7	GSEQTTGAENEVETNALPVVSK	Deamidated(N)@10		0.0049	2260.08	2	7	1.1.1.1322.21	Winner
0	99	EIIDTANTTEMNSDHHSK	Deamidated(N)@12		0.0038	2042.89	3	14	1.1.1.1029.18	Winner
0	99	EIIDTANTTEMNSDHHSK	Deamidated(N)@12		0.0038	2042.89	3	13	1.1.1.1030.14	Winner
0	99	EIIDTANTTEMNSDHHSK	Deamidated(N)@12		0.0038	2042.89	3	16	1.1.1.1031.16	Winner
0	97.8	EIIDTANTTEMNSDHHSK	Deamidated(N)@12		0.0037	2042.89	4	12	1.1.1.1027.14	Winner
0	49.3	EIIDTANTTEMNSDHHSK	Deamidated(N)@12		0.0037	2042.89	4	10	1.1.1.1033.10	Winner
0	24.6	EIIDTANTTEMNSDHHSK	Deamidated(N)@12		0.003	2042.89	4	9	1.1.1.1042.10	Winner
0	< 1	EIIDTANTTEMNSDHHSK	Deamidated(N)@12		0.003	2042.89	4	8	1.1.1.1048.7	Winner
0.01	10.6	LAALSDHNPSAPRNSR	Deamidated(N)@14	missed R-N@13	-0.0005	1705.85	4	8	1.1.1.956.6	Winner
0	99	YQSSHHKEIIDTANTTEMNSDHHSK	Deamidated(N)@14; Oxidation(M)@18	missed K-E@7	-0.0017	2926.28	5	11	1.1.1.816.15	Winner
0	99	FTSQDASTPASSELNKQEK	Deamidated(N)@15	missed K-Q@16	0.0032	2067.96	3	18	1.1.1.1025.16	Winner
0	99	FTSQDASTPASSELNKQEK	Deamidated(N)@15	missed K-Q@16	0.0027	2067.96	3	19	1.1.1.1085.20	Winner
0	99	GSEQTTGAENEVETNALPVVSK	Deamidated(N)@15		0.0049	2260.08	2	10	1.1.1.1330.21	Winner
0	99	GSEQTTGAENEVETNALPVVSK	Deamidated(N)@15		0.0056	2260.08	2	11	1.1.1.1331.21	Winner
0	99	GSEQTTGAENEVETNALPVVSK	Deamidated(N)@15		0.0019	2260.07	3	23	1.1.1.1337.20	Winner
0	99	GSEQTTGAENEVETNALPVVSK	Deamidated(N)@15		0.0019	2260.07	3	15	1.1.1.1343.21	Winner
0	99	GSEQTTGAENEVETNALPVVSK	Deamidated(N)@15		-0.002	2260.07	3	19	1.1.1.1406.15	Winner
0	99	GSEQTTGAENEVETNALPVVSK	Deamidated(N)@15		-0.002	2260.07	3	18	1.1.1.1411.11	Winner
0	98.9	GSEQTTGAENEVETNALPVVSK	Deamidated(N)@15		0.0056	2260.08	2	8	1.1.1.1338.21	Winner
0	52.7	GSEQTTGAENEVETNALPVVSK	Deamidated(N)@15		0.0054	2260.08	2	6	1.1.1.1391.14	Winner
0	97.9	DLVKNEELEIQEK	Deamidated(N)@5	missed K-N@4	0.0028	1586.81	3	9	1.1.1.1353.12	Winner
0	67.7	DLVKNEELEIQEK	Deamidated(N)@5	missed K-N@4	0.0028	1586.81	3	8	1.1.1.1348.9	Winner
0	93.8	ESALNLPYHMPENK	Deamidated(N)@5; Oxidation(M)@10		0.0029	1658.76	3	11	1.1.1.1260.13	Winner
0	23.1	ESALNLPYHMPENK	Deamidated(N)@5; Oxidation(M)@10		0.0029	1658.76	3	8	1.1.1.1261.12	Winner
0	18.2	ESALNLPYHMPENK	Deamidated(N)@5; Oxidation(M)@10		0.0029	1658.76	3	8	1.1.1.1266.10	Winner
0	99	TGSLLNQPK	Deamidated(N)@6		0.001	957.514	2	10	1.1.1.1042.6	Winner
0	98.5	TGSLLNQPK	Deamidated(N)@6		0.001	957.514	2	10	1.1.1.1037.6	Winner
0	94.9	TGSLLNQPK	Deamidated(N)@6		0.001	957.514	2	10	1.1.1.1026.9	Winner
0	92.8	TGSLLNQPK	Deamidated(N)@6		0.012	957.525	2	9	1.1.1.1020.7	Winner
0	54.3	TGSLLNQPK	Deamidated(N)@6		0.001	957.514	2	9	1.1.1.1032.5	Winner
0	< 1	TGSLLNQPK	Deamidated(N)@6		0.012	957.525	2	6	1.1.1.1014.6	Winner
0	24.1	EMDKENNDGSSEIGK	Deamidated(N)@7	missed K-E@4	0.005	1652.69	3	7	1.1.1.852.13	Winner
0	< 1	EIIDTANTTEMNSDHHSK	Deamidated(N)@7; Oxidation(M)@11		-0.0004	2058.88	3	5	1.1.1.944.19	Winner
0	< 1	EIIDTANTTEMNSDHHSK	Deamidated(N)@7; Oxidation(M)@11		-0.0004	2058.88	3	5	1.1.1.946.21	Winner
0	< 1	AGQTVNVNVIVK	Deamidated(N)@8		0.0001	1241.7	2	5	1.1.1.1304.18	Winner
0	< 1	NPFEAIRPGSAQQVK	Deamidated(Q)@13		0.0038	1641.85	3	7	1.1.1.1265.12	Winner
0	77	ETQIITGSDESCRK	Deamidated(Q)@3; Propionamide(C)@12	missed R-K@13	0.0032	1637.76	3	9	1.1.1.957.17	Winner
0	99	FTSQDASTPASSELNK	Deamidated(Q)@4		0.0064	1682.77	2	12	1.1.1.1114.21	Winner
0	97.5	FTSQDASTPASSELNKQEK	Deamidated(Q)@4	missed K-Q@16	0.0027	2067.96	3	12	1.1.1.1079.20	Winner
0	92.3	NQYQALKPR	Deamidated(Q)@4		-0.0052	1117.58	2	9	1.1.1.932.16	Winner
0.3	89.6	EALKQLHSETQR	Deamidated(Q)@5	missed K-Q@4	0.0021	1439.74	3	9	1.1.1.895.11	Winner
2	99	TGSLLNQPK	Deamidated(Q)@7		0.0186	957.532	2	13	1.1.1.973.13	Winner
0	< 1	NEELEIQEK	Deamidated(Q)@7		0.0058	1131.54	2	5	1.1.1.1092.16	Winner
0	< 1	SSAVGPPEK	Dehydrated(S)@2		-0.0001	852.434	2	6	1.1.1.791.4	Winner
0	< 1	YLADGDLHSDGPGR	Delta:H(4)C(2)@N-term		0.0105	1499.71	2	10	1.1.1.1066.21	Winner
0	17.9	ETQIITGSDESCRK	Dioxidation(C)@12; Propionamide(K)@14	missed R-K@13	-0.0178	1668.74	3	9	1.1.1.992.17	Winner
2	99	MGYFPTEEK	Dioxidation(M)@1		0.0004	1132.48	2	11	1.1.1.1178.13	Winner
0	98.8	MGYFPTEEK	Dioxidation(M)@1		0.0019	1132.48	2	9	1.1.1.1183.13	Winner
0	22.1	MGYFPTEEK	Dioxidation(M)@1		0.0019	1132.48	2	8	1.1.1.1172.11	Winner
1.34	99	TVADSDESYMEK	Dioxidation(M)@10		0.0027	1405.56	2	11	1.1.1.903.19	Winner
0	99	EIIDTANTTEMNSDHHSK	Dioxidation(M)@11		-0.0024	2073.89	3	11	1.1.1.933.18	Winner
0	61.3	EIIDTANTTEMNSDHHSK	Dioxidation(M)@11		-0.0024	2073.89	3	8	1.1.1.928.18	Winner
0	99	GPSFMTSPSPK	Dioxidation(M)@5		0.0047	1166.53	2	9	1.1.1.1013.14	Winner
0	99	RGPSFMTSPSPK	Dioxidation(M)@6	missed R-G@1	-0.0037	1322.63	3	10	1.1.1.940.3	Winner
0	99	RGPSFMTSPSPK	Dioxidation(M)@6	missed R-G@1	-0.0037	1322.63	3	10	1.1.1.945.5	Winner
2	99	QLHSETQR	Gln->pyro-Glu@N-term		-0.0012	980.466	2	11	1.1.1.817.11	Winner
0.24	99	QYQALKPR	Gln->pyro-Glu@N-term	cleaved N-Q@N-term	0.0015	985.536	2	9	1.1.1.1119.6	Winner
0	99	QLHSETQR	Gln->pyro-Glu@N-term		-0.0012	980.466	2	12	1.1.1.805.8	Winner
0	99	QLHSETQR	Gln->pyro-Glu@N-term		-0.0012	980.466	2	12	1.1.1.811.13	Winner
0	63.6	QLHSETQR	Gln->pyro-Glu@N-term		-0.0014	980.466	2	6	1.1.1.822.10	Winner
0	18.9	QLHSETQR	Gln->pyro-Glu@N-term		-0.0054	980.462	2	7	1.1.1.827.8	Winner
0	< 1	QLHSETQR	Gln->pyro-Glu@N-term		-0.0054	980.462	2	6	1.1.1.833.10	Winner
0	70.6	QYQALKPR	Gln->pyro-Glu@N-term	cleaved N-Q@N-term	0.0019	985.537	2	7	1.1.1.892.9	Winner
0	66.3	QYQALKPR	Gln->pyro-Glu@N-term	cleaved N-Q@N-term	0.0015	985.536	2	8	1.1.1.1113.7	Winner
0	97.3	ESALNLPYHMPENK	Glu->pyro-Glu@N-term; Oxidation(M)@10		-0.0008	1639.77	2	8	1.1.1.1361.19	Winner
0	88.7	ESALNLPYHMPENK	Glu->pyro-Glu@N-term; Oxidation(M)@10		-0.0008	1639.77	2	8	1.1.1.1367.20	Winner
0	< 1	ESALNLPYHMPENK	Glu->pyro-Glu@N-term; Oxidation(M)@10		-0.0008	1639.77	2	4	1.1.1.1370.20	Winner
0	99	EIIDTANTTEMNSDHHSK	Glu->pyro-Glu@N-term; Oxidation(M)@11		-0.0023	2039.88	3	11	1.1.1.1069.15	Winner
0	99	ETQIITGSDESCRK	Glu->pyro-Glu@N-term; Propionamide(C)@12	missed R-K@13	0.0015	1618.76	2	11	1.1.1.1151.8	Winner
0	< 1	ETQIITGSDESCRK	Glu->pyro-Glu@N-term; Propionamide(C)@12	missed R-K@13	0.0015	1618.76	3	7	1.1.1.929.16	Winner
0	99	ETQIITGSDESCR	Methyl(E)@10; Phospho(S)@11; Cys->Dha(C)@12; Oxidation(R)@13		0.0106	1513.64	2	13	1.1.1.1123.21	Winner
0	43.2	LQVLKAK	Methyl(K)@5	missed K-A@5	0.001	812.549	2	6	1.1.1.872.2	Winner
2	99	MGYFPTEEKSETDENSGKQPSK	Oxidation(M)@1	missed K-S@9; missed K-Q@18	0.0021	2504.1	4	13	1.1.1.1023.19	Winner
0	99	MGYFPTEEK	Oxidation(M)@1		0.0001	1116.48	2	12	1.1.1.1135.10	Winner
0	99	MGYFPTEEK	Oxidation(M)@1		0.0004	1116.48	2	14	1.1.1.1141.7	Winner
0	99	MGYFPTEEK	Oxidation(M)@1		0.0004	1116.48	2	13	1.1.1.1147.7	Winner
0	99	MGYFPTEEK	Oxidation(M)@1		0.0004	1116.48	2	13	1.1.1.1153.9	Winner
0	99	MGYFPTEEK	Oxidation(M)@1		0.0006	1116.48	2	14	1.1.1.1159.14	Winner
0	99	MGYFPTEEK	Oxidation(M)@1		0.0008	1116.48	2	11	1.1.1.1165.16	Winner
0	98.4	MGYFPTEEK	Oxidation(M)@1		0.0008	1116.48	2	9	1.1.1.1171.16	Winner
0	93.3	MGYFPTEEK	Oxidation(M)@1		0.0004	1116.48	2	10	1.1.1.1146.6	Winner
0	85.6	MGYFPTEEK	Oxidation(M)@1		0.004	1116.48	2	8	1.1.1.1177.15	Winner
0	68.6	MGYFPTEEK	Oxidation(M)@1		0.004	1116.48	2	7	1.1.1.1244.13	Winner
0	< 1	MGYFPTEEK	Oxidation(M)@1		-0.0016	1116.48	2	6	1.1.1.1184.15	Winner
0	99	MGYFPTEEKSETDENSGK	Oxidation(M)@1	missed K-S@9	-0.0004	2063.86	3	14	1.1.1.1077.18	Winner
0	99	MGYFPTEEKSETDENSGK	Oxidation(M)@1	missed K-S@9	-0.0004	2063.86	3	21	1.1.1.1083.18	Winner
0	99	MGYFPTEEKSETDENSGK	Oxidation(M)@1	missed K-S@9	-0.0004	2063.86	3	19	1.1.1.1088.21	Winner
0	98.6	MGYFPTEEKSETDENSGKQPSK	Oxidation(M)@1	missed K-S@9; missed K-Q@18	0.0021	2504.1	4	12	1.1.1.1029.17	Winner
0	96.8	MGYFPTEEKSETDENSGK	Oxidation(M)@1; Deamidated(N)@15	missed K-S@9	0.0019	2064.85	3	9	1.1.1.1106.18	Winner
0	76.3	MGYFPTEEKSETDENSGK	Oxidation(M)@1; Deamidated(N)@15	missed K-S@9	0.0019	2064.85	3	9	1.1.1.1100.19	Winner
0	24.1	MGYFPTEEKSETDENSGKQPSK	Oxidation(M)@1; Deamidated(N)@15	missed K-S@9; missed K-Q@18	0.0138	2505.1	4	8	1.1.1.1051.16	Winner
0	99	ESALNLPYHMPENK	Oxidation(M)@10		-0.0011	1657.78	2	14	1.1.1.1224.20	Winner
0	99	ESALNLPYHMPENK	Oxidation(M)@10		-0.0011	1657.78	2	15	1.1.1.1225.21	Winner
0	99	ESALNLPYHMPENK	Oxidation(M)@10		-0.0011	1657.78	2	18	1.1.1.1226.20	Winner
0	99	ESALNLPYHMPENK	Oxidation(M)@10		-0.0025	1657.77	3	16	1.1.1.1227.8	Winner
0	99	ESALNLPYHMPENK	Oxidation(M)@10		-0.0011	1657.78	2	20	1.1.1.1228.19	Winner
0	99	ESALNLPYHMPENK	Oxidation(M)@10		-0.0011	1657.78	2	23	1.1.1.1229.20	Winner
0	99	ESALNLPYHMPENK	Oxidation(M)@10		-0.0011	1657.78	2	20	1.1.1.1230.21	Winner
0	99	ESALNLPYHMPENK	Oxidation(M)@10		-0.0011	1657.78	2	22	1.1.1.1231.19	Winner
0	99	ESALNLPYHMPENK	Oxidation(M)@10		-0.0025	1657.77	3	16	1.1.1.1232.10	Winner
0	99	ESALNLPYHMPENK	Oxidation(M)@10		-0.0011	1657.78	2	19	1.1.1.1233.20	Winner
0	99	ESALNLPYHMPENK	Oxidation(M)@10		-0.0011	1657.78	2	21	1.1.1.1234.20	Winner
0	99	ESALNLPYHMPENK	Oxidation(M)@10		-0.0011	1657.78	2	20	1.1.1.1235.20	Winner
0	99	ESALNLPYHMPENK	Oxidation(M)@10		-0.0011	1657.78	2	18	1.1.1.1236.21	Winner
0	99	ESALNLPYHMPENK	Oxidation(M)@10		-0.0011	1657.78	2	17	1.1.1.1237.20	Winner
0	99	ESALNLPYHMPENK	Oxidation(M)@10		-0.0025	1657.77	3	15	1.1.1.1238.10	Winner
0	99	ESALNLPYHMPENK	Oxidation(M)@10		-0.0011	1657.78	2	15	1.1.1.1238.20	Winner
0	98.9	ESALNLPYHMPENK	Oxidation(M)@10		-0.0025	1657.77	3	12	1.1.1.1244.11	Winner
0	97.6	ESALNLPYHMPENK	Oxidation(M)@10		-0.0031	1657.77	3	11	1.1.1.1250.12	Winner
0	75.2	ESALNLPYHMPENK	Oxidation(M)@10		-0.0025	1657.77	3	10	1.1.1.1222.12	Winner
0	38.2	ESALNLPYHMPENK	Oxidation(M)@10		-0.0003	1657.78	3	8	1.1.1.1255.13	Winner
0	< 1	ESALNLPYHMPENK	Oxidation(M)@10		-0.0025	1657.77	3	7	1.1.1.1243.12	Winner
0	99	TVADSDESYMEK	Oxidation(M)@10		0.0038	1389.56	2	11	1.1.1.866.19	Winner
0	99	TVADSDESYMEK	Oxidation(M)@10		0.0038	1389.56	2	9	1.1.1.871.20	Winner
0	99	TVADSDESYMEK	Oxidation(M)@10		0.0012	1389.56	2	10	1.1.1.881.20	Winner
0	99	TVADSDESYMEK	Oxidation(M)@10		0.0012	1389.56	2	21	1.1.1.886.19	Winner
0	99	TVADSDESYMEK	Oxidation(M)@10		0.0012	1389.56	2	21	1.1.1.892.19	Winner
0	99	TVADSDESYMEK	Oxidation(M)@10		0.0012	1389.56	2	16	1.1.1.898.18	Winner
0	99	TVADSDESYMEK	Oxidation(M)@10		0.001	1389.56	2	11	1.1.1.904.20	Winner
0	99	TVADSDESYMEK	Oxidation(M)@10		0.0027	1389.56	2	9	1.1.1.912.15	Winner
0	99	TVADSDESYMEK	Oxidation(M)@10		0.0027	1389.56	2	10	1.1.1.912.16	Winner
0	96.8	TVADSDESYMEK	Oxidation(M)@10		0.0027	1389.56	2	7	1.1.1.919.18	Winner
0	31	TVADSDESYMEK	Oxidation(M)@10		-0.0016	1389.56	2	6	1.1.1.928.19	Winner
0	99	EIIDTANTTEMNSDHHSK	Oxidation(M)@11		0.0024	2057.9	3	18	1.1.1.910.19	Winner
0	99	EIIDTANTTEMNSDHHSK	Oxidation(M)@11		0.0024	2057.9	4	20	1.1.1.911.12	Winner
0	99	EIIDTANTTEMNSDHHSK	Oxidation(M)@11		0.0024	2057.9	4	17	1.1.1.917.13	Winner
0	99	EIIDTANTTEMNSDHHSK	Oxidation(M)@11		0.0024	2057.9	3	17	1.1.1.918.17	Winner
0	99	EIIDTANTTEMNSDHHSK	Oxidation(M)@11		0.0024	2057.9	3	14	1.1.1.919.17	Winner
0	98.8	EIIDTANTTEMNSDHHSK	Oxidation(M)@11		0.0024	2057.9	4	12	1.1.1.905.10	Winner
0	82.8	EIIDTANTTEMNSDHHSK	Oxidation(M)@11		0.0057	2057.9	2	8	1.1.1.911.21	Winner
0	69	EIIDTANTTEMNSDHHSK	Oxidation(M)@11		0.0024	2057.9	3	10	1.1.1.920.19	Winner
0	< 1	EIIDTANTTEMNSDHHSK	Oxidation(M)@11		0.0005	2057.9	4	6	1.1.1.898.14	Winner
0	99	EIIDTANTTEMNSDHHSK	Oxidation(M)@11; Deamidated(N)@12		0	2058.88	3	16	1.1.1.921.18	Winner
0	99	EIIDTANTTEMNSDHHSK	Oxidation(M)@11; Deamidated(N)@12		0	2058.88	3	17	1.1.1.922.19	Winner
0	99	EIIDTANTTEMNSDHHSK	Oxidation(M)@11; Deamidated(N)@12		0.0037	2058.88	4	14	1.1.1.923.9	Winner
0	99	EIIDTANTTEMNSDHHSK	Oxidation(M)@11; Deamidated(N)@12		0	2058.88	3	18	1.1.1.927.19	Winner
0	99	EIIDTANTTEMNSDHHSK	Oxidation(M)@11; Deamidated(N)@12		0.0037	2058.88	4	16	1.1.1.928.8	Winner
0	99	EIIDTANTTEMNSDHHSK	Oxidation(M)@11; Deamidated(N)@12		0	2058.88	3	17	1.1.1.929.20	Winner
0	99	EIIDTANTTEMNSDHHSK	Oxidation(M)@11; Deamidated(N)@12		0	2058.88	3	17	1.1.1.930.20	Winner
0	99	EIIDTANTTEMNSDHHSK	Oxidation(M)@11; Deamidated(N)@12		0	2058.88	3	13	1.1.1.931.19	Winner
0	99	EIIDTANTTEMNSDHHSK	Oxidation(M)@11; Deamidated(N)@12		0	2058.88	3	12	1.1.1.932.19	Winner
0	99	EIIDTANTTEMNSDHHSK	Oxidation(M)@11; Deamidated(N)@12		-0.0004	2058.88	3	15	1.1.1.934.21	Winner
0	99	EIIDTANTTEMNSDHHSK	Oxidation(M)@11; Deamidated(N)@12		-0.0004	2058.88	3	12	1.1.1.941.21	Winner
0	97.6	EIIDTANTTEMNSDHHSK	Oxidation(M)@11; Deamidated(N)@12		0.0027	2058.88	4	12	1.1.1.931.10	Winner
0	87.3	EIIDTANTTEMNSDHHSK	Oxidation(M)@11; Deamidated(N)@12		0.0037	2058.88	4	11	1.1.1.926.11	Winner
0	87	EIIDTANTTEMNSDHHSK	Oxidation(M)@11; Deamidated(N)@12		0.0027	2058.88	4	11	1.1.1.933.13	Winner
0	75.4	EIIDTANTTEMNSDHHSK	Oxidation(M)@11; Deamidated(N)@12		-0.0004	2058.88	3	9	1.1.1.943.21	Winner
0	48.1	EIIDTANTTEMNSDHHSK	Oxidation(M)@11; Deamidated(N)@12		0.0027	2058.88	4	10	1.1.1.940.12	Winner
0.03	52.6	HKEIIDTANTTEMNSDHHSK	Oxidation(M)@13	cleaved H-H@N-term; missed K-E@2	0.0045	2323.05	4	10	1.1.1.806.14	Winner
2	99	YQSSHHKEIIDTANTTEMNSDHHSK	Oxidation(M)@18	missed K-E@7	-0.0018	2925.29	5	20	1.1.1.847.12	Winner
0	99	YQSSHHKEIIDTANTTEMNSDHHSK	Oxidation(M)@18	missed K-E@7	-0.0039	2925.29	6	15	1.1.1.848.8	Winner
0	99	YQSSHHKEIIDTANTTEMNSDHHSK	Oxidation(M)@18	missed K-E@7	0.0006	2925.3	4	26	1.1.1.848.14	Winner
0	99	YQSSHHKEIIDTANTTEMNSDHHSK	Oxidation(M)@18	missed K-E@7	0.0006	2925.3	4	23	1.1.1.849.15	Winner
0	99	YQSSHHKEIIDTANTTEMNSDHHSK	Oxidation(M)@18	missed K-E@7	0.0006	2925.3	4	20	1.1.1.850.15	Winner
0	99	YQSSHHKEIIDTANTTEMNSDHHSK	Oxidation(M)@18	missed K-E@7	0.0006	2925.3	4	17	1.1.1.851.19	Winner
0	99	YQSSHHKEIIDTANTTEMNSDHHSK	Oxidation(M)@18	missed K-E@7	-0.0018	2925.29	5	17	1.1.1.853.17	Winner
0	95.9	YQSSHHKEIIDTANTTEMNSDHHSK	Oxidation(M)@18	missed K-E@7	0.0006	2925.3	4	11	1.1.1.852.19	Winner
0	< 1	YQSSHHKEIIDTANTTEMNSDHHSK	Oxidation(M)@18	missed K-E@7	-0.0039	2925.29	6	7	1.1.1.854.9	Winner
0	< 1	YQSSHHKEIIDTANTTEMNSDHHSK	Oxidation(M)@18	missed K-E@7	0.0006	2925.3	4	6	1.1.1.854.19	Winner
0	99	YQSSHHKEIIDTANTTEMNSDHHSK	Oxidation(M)@18; Deamidated(N)@19	missed K-E@7	-0.0014	2926.28	5	14	1.1.1.834.14	Winner
0	99	YQSSHHKEIIDTANTTEMNSDHHSK	Oxidation(M)@18; Deamidated(N)@19	missed K-E@7	0.0048	2926.28	4	16	1.1.1.836.15	Winner
0	99	YQSSHHKEIIDTANTTEMNSDHHSK	Oxidation(M)@18; Deamidated(N)@19	missed K-E@7	0.0048	2926.28	4	12	1.1.1.838.20	Winner
0	84.4	YQSSHHKEIIDTANTTEMNSDHHSK	Oxidation(M)@18; Deamidated(N)@19	missed K-E@7	-0.0014	2926.28	5	11	1.1.1.840.14	Winner
0	81.4	YQSSHHKEIIDTANTTEMNSDHHSK	Oxidation(M)@18; Deamidated(N)@19	missed K-E@7	0.0048	2926.28	4	8	1.1.1.839.19	Winner
0	23.9	YQSSHHKEIIDTANTTEMNSDHHSK	Oxidation(M)@18; Deamidated(N)@19	missed K-E@7	0.0048	2926.28	4	8	1.1.1.837.20	Winner
0	< 1	YQSSHHKEIIDTANTTEMNSDHHSK	Oxidation(M)@18; Deamidated(N)@19	missed K-E@7	0.0021	2926.28	6	7	1.1.1.838.11	Winner
2	99	DMGTDGKEELK	Oxidation(M)@2	missed K-E@7	0.0043	1237.55	2	17	1.1.1.766.2	Winner
2	99	DMGTDGKEELKADVVPVTLAPK	Oxidation(M)@2	missed K-E@7; missed K-A@11	-0.0015	2328.19	4	18	1.1.1.1397.11	Winner
2	99	EMDKENNDGSSEIGK	Oxidation(M)@2	missed K-E@4	-0.0014	1667.69	2	14	1.1.1.752.7	Winner
2	99	PMVIQESK	Oxidation(M)@2	cleaved R-P@N-term	0	946.479	2	12	1.1.1.831.6	Winner
0	99	DMGTDGKEELK	Oxidation(M)@2	missed K-E@7	0.0043	1237.55	2	11	1.1.1.773.3	Winner
0	98.4	DMGTDGKEELK	Oxidation(M)@2	missed K-E@7	0.0043	1237.55	2	8	1.1.1.774.10	Winner
0	46.4	DMGTDGKEELK	Oxidation(M)@2	missed K-E@7	-0.0011	1237.55	3	9	1.1.1.772.2	Winner
0	99	DMGTDGKEELKADVVPVTLAPK	Oxidation(M)@2	missed K-E@7; missed K-A@11	-0.0008	2328.19	3	23	1.1.1.1398.20	Winner
0	99	DMGTDGKEELKADVVPVTLAPK	Oxidation(M)@2	missed K-E@7; missed K-A@11	-0.0008	2328.19	3	21	1.1.1.1399.19	Winner
0	99	DMGTDGKEELKADVVPVTLAPK	Oxidation(M)@2	missed K-E@7; missed K-A@11	-0.0008	2328.19	3	17	1.1.1.1400.20	Winner
0	99	DMGTDGKEELKADVVPVTLAPK	Oxidation(M)@2	missed K-E@7; missed K-A@11	-0.0008	2328.19	3	13	1.1.1.1401.20	Winner
0	99	DMGTDGKEELKADVVPVTLAPK	Oxidation(M)@2	missed K-E@7; missed K-A@11	-0.0015	2328.19	4	17	1.1.1.1402.10	Winner
0	99	DMGTDGKEELKADVVPVTLAPK	Oxidation(M)@2	missed K-E@7; missed K-A@11	-0.0008	2328.19	3	14	1.1.1.1403.19	Winner
0	99	DMGTDGKEELKADVVPVTLAPK	Oxidation(M)@2	missed K-E@7; missed K-A@11	-0.0008	2328.19	3	11	1.1.1.1404.15	Winner
0	99	DMGTDGKEELKADVVPVTLAPK	Oxidation(M)@2	missed K-E@7; missed K-A@11	-0.0008	2328.19	3	9	1.1.1.1405.20	Winner
0	99	DMGTDGKEELKADVVPVTLAPK	Oxidation(M)@2	missed K-E@7; missed K-A@11	-0.0084	2328.18	4	16	1.1.1.1412.12	Winner
0	92	DMGTDGKEELKADVVPVTLAPK	Oxidation(M)@2	missed K-E@7; missed K-A@11	-0.0013	2328.19	3	10	1.1.1.1414.13	Winner
0	85.6	DMGTDGKEELKADVVPVTLAPK	Oxidation(M)@2	missed K-E@7; missed K-A@11	-0.0008	2328.19	3	8	1.1.1.1392.18	Winner
0	71.8	DMGTDGKEELKADVVPVTLAPK	Oxidation(M)@2	missed K-E@7; missed K-A@11	-0.0015	2328.19	4	10	1.1.1.1407.9	Winner
0	17.3	DMGTDGKEELKADVVPVTLAPK	Oxidation(M)@2	missed K-E@7; missed K-A@11	-0.0008	2328.19	3	6	1.1.1.1406.16	Winner
0	< 1	DMGTDGKEELKADVVPVTLAPK	Oxidation(M)@2	missed K-E@7; missed K-A@11	-0.0015	2328.19	4	6	1.1.1.1391.7	Winner
0	99	EMDKENNDGSSEIGK	Oxidation(M)@2	missed K-E@4	-0.0014	1667.69	2	10	1.1.1.750.11	Winner
0	99	EMDKENNDGSSEIGK	Oxidation(M)@2	missed K-E@4	-0.0014	1667.69	2	14	1.1.1.751.5	Winner
0	96.5	EMDKENNDGSSEIGK	Oxidation(M)@2	missed K-E@4	-0.0009	1667.69	3	11	1.1.1.754.7	Winner
0	88.7	EMDKENNDGSSEIGK	Oxidation(M)@2	missed K-E@4	-0.0014	1667.69	2	7	1.1.1.753.16	Winner
0	42.6	EMDKENNDGSSEIGK	Oxidation(M)@2	missed K-E@4	-0.0009	1667.69	3	9	1.1.1.748.7	Winner
0	99	PMVIQESK	Oxidation(M)@2	cleaved R-P@N-term	0	946.479	2	10	1.1.1.820.9	Winner
0	99	PMVIQESK	Oxidation(M)@2	cleaved R-P@N-term	0	946.479	2	12	1.1.1.825.6	Winner
0	99	EMDKENNDGSSEIGK	Oxidation(M)@2; Deamidated(N)@6	missed K-E@4	-0.0004	1668.68	3	15	1.1.1.772.5	Winner
0	< 1	DMGTDGKEELKADVVPVTLAPKK	Oxidation(M)@2; Lys-loss@C-term	missed K-E@7; missed K-A@11; missed K-K@22	-0.0013	2328.19	3	10	1.1.1.1414.13	Winner
0	< 1	SFMTSPSPK	Oxidation(M)@3	cleaved P-S@N-term	0.0299	996.489	2	8	1.1.1.871.13	Winner
0	< 1	SFMTSPSPK	Oxidation(M)@3	cleaved P-S@N-term	0.0299	996.489	2	6	1.1.1.876.11	Winner
2	99	ENMEELLNLCSGK	Oxidation(M)@3; Cys->Dha(C)@10		-0.0007	1460.68	2	12	1.1.1.1407.13	Winner
0	99	ENMEELLNLCSGK	Oxidation(M)@3; Cys->Dha(C)@10		-0.0027	1460.68	2	9	1.1.1.1383.16	Winner
0	99	ENMEELLNLCSGK	Oxidation(M)@3; Cys->Dha(C)@10		-0.0005	1460.68	2	10	1.1.1.1402.14	Winner
0	99	ENMEELLNLCSGK	Oxidation(M)@3; Cys->Dha(C)@10		-0.0007	1460.68	2	13	1.1.1.1412.15	Winner
0	99	ENMEELLNLCSGK	Oxidation(M)@3; Cys->Dha(C)@10		-0.0007	1460.68	2	11	1.1.1.1418.7	Winner
0	99	ENMEELLNLCSGK	Oxidation(M)@3; Cys->Dha(C)@10		-0.0003	1460.68	2	13	1.1.1.1432.16	Winner
0	99	ENMEELLNLCSGK	Oxidation(M)@3; Cys->Dha(C)@10		0.0001	1460.68	2	9	1.1.1.1438.17	Winner
0	< 1	ENMEELLNLCSGK	Oxidation(M)@3; Cys->Dha(C)@10		-0.0027	1460.68	2	6	1.1.1.1378.18	Winner
0	99	ENMEELLNLCSGK	Oxidation(M)@3; Trioxidation(C)@10		-0.0031	1542.65	2	21	1.1.1.1422.6	Winner
0	99	ENMEELLNLCSGK	Oxidation(M)@3; Trioxidation(C)@10		-0.0031	1542.65	2	20	1.1.1.1428.7	Winner
0	99	ENMEELLNLCSGK	Oxidation(M)@3; Trioxidation(C)@10		-0.0031	1542.65	2	20	1.1.1.1434.9	Winner
0	99	ENMEELLNLCSGK	Oxidation(M)@3; Trioxidation(C)@10		-0.0008	1542.65	2	16	1.1.1.1440.15	Winner
0	99	ENMEELLNLCSGK	Oxidation(M)@3; Trioxidation(C)@10; Formyl(K)@13		0.018	1570.67	2	16	1.1.1.1545.6	Winner
0	99	ENMEELLNLCSGK	Oxidation(M)@3; Trioxidation(C)@10; Formyl(K)@13		0.018	1570.67	2	14	1.1.1.1550.8	Winner
0.04	72.9	SRPMVIQESK	Oxidation(M)@4	cleaved A-S@N-term	-0.0011	1189.61	2	10	1.1.1.847.13	Winner
0	51.2	SRPMVIQESK	Oxidation(M)@4	cleaved A-S@N-term	0.0025	1189.62	2	7	1.1.1.804.11	Winner
0	99	KENMEELLNLCSGK	Oxidation(M)@4; Cys->Dha(C)@11	missed K-E@1	0.0017	1588.78	3	11	1.1.1.1281.13	Winner
2	99	KENMEELLNLCSGK	Oxidation(M)@4; Trioxidation(C)@11	missed K-E@1	0.0024	1670.75	2	14	1.1.1.1309.21	Winner
0	99	KENMEELLNLCSGK	Oxidation(M)@4; Trioxidation(C)@11	missed K-E@1	0.0024	1670.75	2	13	1.1.1.1299.21	Winner
0	99	KENMEELLNLCSGK	Oxidation(M)@4; Trioxidation(C)@11	missed K-E@1	0.0024	1670.75	2	17	1.1.1.1304.21	Winner
0	99	KENMEELLNLCSGK	Oxidation(M)@4; Trioxidation(C)@11	missed K-E@1	0.0025	1670.75	2	11	1.1.1.1314.20	Winner
2	99	DEKEMDKENNDGSSEIGK	Oxidation(M)@5	missed K-E@3; missed K-E@7	-0.001	2039.86	4	20	1.1.1.764.3	Winner
1.59	99	ASRPMVIQESK	Oxidation(M)@5	cleaved N-A@N-term	0.0038	1260.65	2	11	1.1.1.830.11	Winner
0.06	68.3	HGNAMALLK	Oxidation(M)@5	cleaved C-H@N-term	-0.0012	969.505	2	7	1.1.1.851.10	Winner
0	99	ASRPMVIQESK	Oxidation(M)@5	cleaved N-A@N-term	-0.0012	1260.65	3	10	1.1.1.827.3	Winner
0	< 1	ASRPMVIQESK	Oxidation(M)@5	cleaved N-A@N-term	0.0038	1260.65	2	5	1.1.1.829.19	Winner
0	99	DEKEMDKENNDGSSEIGK	Oxidation(M)@5	missed K-E@3; missed K-E@7	0	2039.86	3	15	1.1.1.758.6	Winner
0	99	DEKEMDKENNDGSSEIGK	Oxidation(M)@5	missed K-E@3; missed K-E@7	0	2039.86	3	24	1.1.1.765.7	Winner
0	99	DEKEMDKENNDGSSEIGK	Oxidation(M)@5	missed K-E@3; missed K-E@7	0	2039.86	3	16	1.1.1.769.5	Winner
0	86.4	DEKEMDKENNDGSSEIGK	Oxidation(M)@5	missed K-E@3; missed K-E@7	-0.001	2039.86	4	8	1.1.1.774.8	Winner
0	99	GPSFMTSPSPK	Oxidation(M)@5		-0.0009	1150.53	2	16	1.1.1.980.14	Winner
0	99	GPSFMTSPSPK	Oxidation(M)@5		-0.0009	1150.53	2	18	1.1.1.986.11	Winner
0	99	GPSFMTSPSPK	Oxidation(M)@5		-0.0009	1150.53	2	19	1.1.1.991.13	Winner
0	99	GPSFMTSPSPK	Oxidation(M)@5		-0.0009	1150.53	2	18	1.1.1.996.15	Winner
0	99	GPSFMTSPSPK	Oxidation(M)@5		-0.0006	1150.53	2	11	1.1.1.1001.16	Winner
0	41.4	GPSFMTSPSPK	Oxidation(M)@5		-0.0019	1150.53	2	6	1.1.1.940.18	Winner
0	99	DEKEMDKENNDGSSEIGK	Oxidation(M)@5; Deamidated(N)@10	missed K-E@3; missed K-E@7	-0.0019	2040.84	4	16	1.1.1.784.4	Winner
0	99	DEKEMDKENNDGSSEIGK	Oxidation(M)@5; Deamidated(N)@10	missed K-E@3; missed K-E@7	-0.0004	2040.84	3	14	1.1.1.785.7	Winner
0	99	DEKEMDKENNDGSSEIGK	Oxidation(M)@5; Deamidated(N)@10	missed K-E@3; missed K-E@7	-0.0004	2040.84	3	15	1.1.1.786.13	Winner
0	99	DEKEMDKENNDGSSEIGK	Oxidation(M)@5; Deamidated(N)@9	missed K-E@3; missed K-E@7	-0.0008	2040.84	3	16	1.1.1.778.5	Winner
0	99	DEKEMDKENNDGSSEIGK	Oxidation(M)@5; Deamidated(N)@9	missed K-E@3; missed K-E@7	0.001	2040.84	3	13	1.1.1.787.15	Winner
0	99	DEKEMDKENNDGSSEIGK	Oxidation(M)@5; Deamidated(N)@9	missed K-E@3; missed K-E@7	0.001	2040.84	3	17	1.1.1.788.8	Winner
0	99	DEKEMDKENNDGSSEIGK	Oxidation(M)@5; Deamidated(N)@9	missed K-E@3; missed K-E@7	-0.0019	2040.84	4	15	1.1.1.790.3	Winner
0	99	DEKEMDKENNDGSSEIGK	Oxidation(M)@5; Deamidated(N)@9	missed K-E@3; missed K-E@7	0.001	2040.84	3	12	1.1.1.791.12	Winner
0	99	DEKEMDKENNDGSSEIGK	Oxidation(M)@5; Deamidated(N)@9	missed K-E@3; missed K-E@7	0.001	2040.84	3	10	1.1.1.792.17	Winner
0	97.9	DEKEMDKENNDGSSEIGK	Oxidation(M)@5; Deamidated(N)@9	missed K-E@3; missed K-E@7	0.001	2040.84	3	12	1.1.1.789.7	Winner
0	99	NASRPMVIQESK	Oxidation(M)@6		0.0004	1374.69	2	10	1.1.1.838.18	Winner
0	99	NASRPMVIQESK	Oxidation(M)@6		0.0004	1374.69	2	10	1.1.1.839.18	Winner
0	99	NASRPMVIQESK	Oxidation(M)@6		0.0004	1374.69	2	13	1.1.1.840.19	Winner
0	99	NASRPMVIQESK	Oxidation(M)@6		0.0004	1374.69	2	16	1.1.1.841.19	Winner
0	99	NASRPMVIQESK	Oxidation(M)@6		0.0004	1374.69	2	15	1.1.1.842.17	Winner
0	99	NASRPMVIQESK	Oxidation(M)@6		0.0004	1374.69	3	16	1.1.1.843.8	Winner
0	99	NASRPMVIQESK	Oxidation(M)@6		0.0004	1374.69	2	16	1.1.1.845.13	Winner
0	99	NASRPMVIQESK	Oxidation(M)@6		0.0004	1374.69	2	16	1.1.1.846.14	Winner
0	99	NASRPMVIQESK	Oxidation(M)@6		0.0004	1374.69	3	13	1.1.1.849.6	Winner
0	97.1	NASRPMVIQESK	Oxidation(M)@6		0.0001	1374.69	3	11	1.1.1.855.4	Winner
0	71.1	NASRPMVIQESK	Oxidation(M)@6		0.0004	1374.69	3	9	1.1.1.837.7	Winner
0	55.9	NASRPMVIQESK	Oxidation(M)@6		0.0004	1374.69	2	7	1.1.1.852.18	Winner
0	< 1	NASRPMVIQESK	Oxidation(M)@6		0.0001	1374.69	3	7	1.1.1.860.6	Winner
0	99	RGPSFMTSPSPK	Oxidation(M)@6	missed R-G@1	0.0023	1306.64	3	11	1.1.1.913.4	Winner
0	99	RGPSFMTSPSPK	Oxidation(M)@6	missed R-G@1	0.0015	1306.64	2	12	1.1.1.915.19	Winner
0	99	RGPSFMTSPSPK	Oxidation(M)@6	missed R-G@1	0.0023	1306.64	3	15	1.1.1.919.4	Winner
0	99	RGPSFMTSPSPK	Oxidation(M)@6	missed R-G@1	0.0023	1306.64	3	16	1.1.1.924.7	Winner
0	68.7	RGPSFMTSPSPK	Oxidation(M)@6	missed R-G@1	0.0027	1306.64	3	9	1.1.1.929.8	Winner
0	38.4	RGPSFMTSPSPK	Oxidation(M)@6	missed R-G@1	0.027	1306.66	3	7	1.1.1.935.5	Winner
0	< 1	RGPSFMTSPSPK	Oxidation(M)@6	missed R-G@1	0.027	1306.66	3	5	1.1.1.946.8	Winner
0	< 1	RGPSFMTSPSPK	Oxidation(M)@6	missed R-G@1	0.027	1306.66	3	5	1.1.1.951.6	Winner
0	58.2	NASRPMVIQESK	Oxidation(M)@6; Deamidated(Q)@9		0.003	1375.68	3	10	1.1.1.866.7	Winner
0	< 1	NASRPMVIQESK	Oxidation(M)@6; Deamidated(Q)@9		0.0054	1375.68	3	4	1.1.1.871.9	Winner
0	< 1	RGPSFMTSPSPK	Oxidation(M)@6; Phospho(S)@10	missed R-G@1	0.0036	1386.6	2	5	1.1.1.1014.19	Winner
0	< 1	RGPSFMTSPSPK	Oxidation(M)@6; Phospho(S)@10	missed R-G@1	0.003	1386.6	2	5	1.1.1.1021.20	Winner
0	< 1	RGPSFMTSPSPK	Oxidation(M)@6; Phospho(S)@10	missed R-G@1	-0.0033	1386.6	2	3	1.1.1.1055.16	Winner
2	99	KRGPSFMTSPSPK	Oxidation(M)@7	missed K-R@1; missed R-G@2	-0.0009	1434.73	3	17	1.1.1.827.7	Winner
0	97.9	KRGPSFMTSPSPK	Oxidation(M)@7	missed K-R@1; missed R-G@2	-0.0009	1434.73	3	10	1.1.1.822.7	Winner
0	96.7	KRGPSFMTSPSPK	Oxidation(M)@7	missed K-R@1; missed R-G@2	-0.0009	1434.73	3	11	1.1.1.833.9	Winner
0	52.2	KRGPSFMTSPSPK	Oxidation(M)@7	missed K-R@1; missed R-G@2	0.0025	1434.73	2	7	1.1.1.825.12	Winner
0	41.9	KRGPSFMTSPSPK	Oxidation(M)@7	missed K-R@1; missed R-G@2	0.0025	1434.73	2	6	1.1.1.826.20	Winner
0	< 1	KRGPSFMTSPSPK	Oxidation(M)@7	missed K-R@1; missed R-G@2	0.001	1434.73	3	7	1.1.1.774.7	Winner
0	< 1	KRGPSFMTSPSPK	Oxidation(M)@7	missed K-R@1; missed R-G@2	0.0025	1434.73	2	3	1.1.1.829.21	Winner
0	< 1	KRGPSFMTSPSPK	Oxidation(M)@7; Phospho(S)@11	missed K-R@1; missed R-G@2	-0.0001	1514.7	3	5	1.1.1.882.13	Winner
0	28.2	KRGPSFMTSPSPK	Oxidation(M)@7; Phospho(S)@9	missed K-R@1; missed R-G@2	-0.0031	1514.69	3	7	1.1.1.900.11	Winner
0	< 1	KRGPSFMTSPSPK	Oxidation(M)@7; Phospho(S)@9	missed K-R@1; missed R-G@2	-0.0001	1514.7	3	4	1.1.1.887.12	Winner
2	99	NIDDASQMDLFHR	Oxidation(M)@8		0.0012	1576.7	2	15	1.1.1.1251.20	Winner
0	99	NIDDASQMDLFHR	Oxidation(M)@8		0.0012	1576.7	2	13	1.1.1.1245.19	Winner
0	99	NIDDASQMDLFHR	Oxidation(M)@8		0.0012	1576.7	2	13	1.1.1.1246.18	Winner
0	99	NIDDASQMDLFHR	Oxidation(M)@8		-0.0022	1576.69	3	13	1.1.1.1247.12	Winner
0	99	NIDDASQMDLFHR	Oxidation(M)@8		-0.0022	1576.69	3	12	1.1.1.1247.13	Winner
0	99	NIDDASQMDLFHR	Oxidation(M)@8		0.0012	1576.7	2	15	1.1.1.1248.21	Winner
0	99	NIDDASQMDLFHR	Oxidation(M)@8		0.0012	1576.7	2	14	1.1.1.1249.20	Winner
0	99	NIDDASQMDLFHR	Oxidation(M)@8		0.0012	1576.7	2	13	1.1.1.1250.20	Winner
0	99	NIDDASQMDLFHR	Oxidation(M)@8		-0.0022	1576.69	3	14	1.1.1.1252.11	Winner
0	99	NIDDASQMDLFHR	Oxidation(M)@8		0.0012	1576.7	2	11	1.1.1.1254.19	Winner
0	99	NIDDASQMDLFHR	Oxidation(M)@8		0.0012	1576.7	2	13	1.1.1.1255.21	Winner
0	99	NIDDASQMDLFHR	Oxidation(M)@8		0.0012	1576.7	2	11	1.1.1.1256.20	Winner
0	99	NIDDASQMDLFHR	Oxidation(M)@8		-0.0022	1576.69	3	14	1.1.1.1257.11	Winner
0	99	NIDDASQMDLFHR	Oxidation(M)@8		-0.0022	1576.69	3	12	1.1.1.1262.13	Winner
0	85.9	NIDDASQMDLFHR	Oxidation(M)@8		-0.002	1576.69	3	9	1.1.1.1241.9	Winner
0	55.3	NIDDASQMDLFHR	Oxidation(M)@8		0.0012	1576.7	2	7	1.1.1.1258.19	Winner
0	10.9	NIDDASQMDLFHR	Oxidation(M)@8		0.0012	1576.7	2	5	1.1.1.1259.19	Winner
0	3	KSDKKENMEELLNLCSGK	Oxidation(M)@8; Cys->Dha(C)@15	missed K-S@1; missed K-K@4; missed K-E@5	0.0026	2047.03	4	9	1.1.1.1121.11	Winner
2	99	KSDKKENMEELLNLCSGK	Oxidation(M)@8; Trioxidation(C)@15	missed K-S@1; missed K-K@4; missed K-E@5	0.0006	2129	4	17	1.1.1.1140.8	Winner
0	99	KSDKKENMEELLNLCSGK	Oxidation(M)@8; Trioxidation(C)@15	missed K-S@1; missed K-K@4; missed K-E@5	0.0023	2129	3	12	1.1.1.1132.19	Winner
0	99	KSDKKENMEELLNLCSGK	Oxidation(M)@8; Trioxidation(C)@15	missed K-S@1; missed K-K@4; missed K-E@5	0.0023	2129	3	14	1.1.1.1133.20	Winner
0	99	KSDKKENMEELLNLCSGK	Oxidation(M)@8; Trioxidation(C)@15	missed K-S@1; missed K-K@4; missed K-E@5	0.0006	2129	4	14	1.1.1.1134.12	Winner
0	99	KSDKKENMEELLNLCSGK	Oxidation(M)@8; Trioxidation(C)@15	missed K-S@1; missed K-K@4; missed K-E@5	0.0023	2129	3	13	1.1.1.1136.21	Winner
0	99	KSDKKENMEELLNLCSGK	Oxidation(M)@8; Trioxidation(C)@15	missed K-S@1; missed K-K@4; missed K-E@5	0.0023	2129	3	20	1.1.1.1137.12	Winner
0	99	KSDKKENMEELLNLCSGK	Oxidation(M)@8; Trioxidation(C)@15	missed K-S@1; missed K-K@4; missed K-E@5	0.0023	2129	3	19	1.1.1.1138.10	Winner
0	99	KSDKKENMEELLNLCSGK	Oxidation(M)@8; Trioxidation(C)@15	missed K-S@1; missed K-K@4; missed K-E@5	0.0036	2129	3	16	1.1.1.1141.12	Winner
0	31.6	SRPMVIQESK	Oxidation(P)@3	cleaved A-S@N-term	-0.0011	1189.61	2	7	1.1.1.841.16	Winner
0	99	ASRPMVIQESK	Oxidation(P)@4	cleaved N-A@N-term	-0.0012	1260.65	3	13	1.1.1.833.4	Winner
0	61.3	KPRPTCHGNAMALLK	Oxidation(P)@4; Dioxidation(C)@6; Deamidated(N)@9; Oxidation(M)@11		0.0003	1700.83	3	11	1.1.1.1002.15	Winner
2	99	KPRPTCHGNAMALLK	Oxidation(P)@4; Dioxidation(C)@6; Oxidation(M)@11		0.0013	1699.85	3	18	1.1.1.911.16	Winner
0	61.3	NASRPMVIQESK	Oxidation(P)@5; Oxidation(M)@6		0.0009	1390.69	3	10	1.1.1.870.11	Winner
0	< 1	NASRPMVIQESK	Oxidation(P)@5; Oxidation(M)@6		-0.0006	1390.69	2	6	1.1.1.865.19	Winner
0	< 1	SSAVGPPEK	Oxidation(P)@7		0.001	886.441	2	6	1.1.1.1079.7	Winner
0	< 1	SSAVGPPEK	Oxidation(P)@7		0.001	886.441	2	6	1.1.1.1090.5	Winner
0	99	SPSPGLFR	Phospho(S)@1		-0.0013	939.42	2	9	1.1.1.1380.7	Winner
0	98.6	ETQIITGSDESCRK	Phospho(S)@11; Cys->Dha(C)@12; Oxidation(R)@13; Methyl(K)@14	missed R-K@13	0.0117	1641.74	2	12	1.1.1.1001.21	Winner
0	99	FTSQDASTPASSELNKQEK	Phospho(S)@12	missed K-Q@16	-0.0019	2146.94	3	11	1.1.1.1087.20	Winner
0	< 1	FTSQDASTPASSELNKQEK	Phospho(S)@12	missed K-Q@16	-0.0019	2146.94	3	6	1.1.1.1092.19	Winner
0	< 1	GSEQTTGAENEVETNALPVVSK	Phospho(S)@2; Dehydrated(T)@5; Dehydrated(T)@6		0.0195	2303.05	3	9	1.1.1.1372.17	Winner
2	99	SPSPGLFR	Phospho(S)@3		0.0013	939.423	2	12	1.1.1.1340.8	Winner
0	< 1	NASRPMVIQESK	Phospho(S)@3		0.0285	1438.69	2	5	1.1.1.976.18	Winner
0	99	SPSPGLFR	Phospho(S)@3		0.0009	939.423	2	9	1.1.1.1323.6	Winner
0	99	SPSPGLFR	Phospho(S)@3		0.0013	939.423	2	11	1.1.1.1329.8	Winner
0	99	SPSPGLFR	Phospho(S)@3		0.0013	939.423	2	11	1.1.1.1335.8	Winner
0	99	SPSPGLFR	Phospho(S)@3		0.0013	939.423	2	11	1.1.1.1350.5	Winner
0	99	SPSPGLFR	Phospho(S)@3		-0.0003	939.421	2	10	1.1.1.1360.5	Winner
0	99	SPSPGLFR	Phospho(S)@3		-0.0005	939.421	2	10	1.1.1.1370.5	Winner
0	98.4	SPSPGLFR	Phospho(S)@3		0.0011	939.423	2	10	1.1.1.1355.5	Winner
0	97.4	SPSPGLFR	Phospho(S)@3		-0.0001	939.421	2	9	1.1.1.1365.7	Winner
0	97.2	SPSPGLFR	Phospho(S)@3		-0.0009	939.421	2	8	1.1.1.1375.5	Winner
0	96.3	SPSPGLFR	Phospho(S)@3		-0.0011	939.42	2	8	1.1.1.1385.6	Winner
0	94.3	SPSPGLFR	Phospho(S)@3		-0.0007	939.421	2	8	1.1.1.1390.9	Winner
0	91.7	SPSPGLFR	Phospho(S)@3		0.0013	939.423	2	9	1.1.1.1345.7	Winner
0	75.9	SPSPGLFR	Phospho(S)@3		-0.0013	939.42	2	8	1.1.1.1416.5	Winner
0	53.9	SPSPGLFR	Phospho(S)@3		0.0001	939.422	2	5	1.1.1.1453.2	Winner
0	51.5	SPSPGLFR	Phospho(S)@3		-0.0001	939.421	2	6	1.1.1.1482.2	Winner
0	42.4	SPSPGLFR	Phospho(S)@3		-0.0007	939.421	2	7	1.1.1.1395.7	Winner
0	36.7	SPSPGLFR	Phospho(S)@3		-0.0015	939.42	2	5	1.1.1.1443.7	Winner
0	28	SPSPGLFR	Phospho(S)@3		-0.0001	939.421	2	5	1.1.1.1318.5	Winner
0	18.2	SPSPGLFR	Phospho(S)@3		-0.0011	939.42	2	4	1.1.1.1448.5	Winner
0	< 1	ALLKSSK	Phospho(S)@5	cleaved M-A@N-term; missed K-S@4	0.0247	825.461	2	5	1.1.1.1180.4	Winner
2	99	NFVFHTLSPVKAEAAK	Phospho(S)@8	missed K-A@11	-0.0009	1837.91	3	20	1.1.1.1454.9	Winner
0	99	NFVFHTLSPVK	Phospho(S)@8		-0.0009	1367.66	2	12	1.1.1.1524.6	Winner
0	99	NFVFHTLSPVK	Phospho(S)@8		0.0017	1367.67	2	15	1.1.1.1529.5	Winner
0	99	NFVFHTLSPVK	Phospho(S)@8		-0.0008	1367.66	2	18	1.1.1.1535.4	Winner
0	99	NFVFHTLSPVK	Phospho(S)@8		-0.0008	1367.66	2	18	1.1.1.1540.4	Winner
0	99	NFVFHTLSPVK	Phospho(S)@8		-0.0008	1367.66	2	18	1.1.1.1545.5	Winner
0	99	NFVFHTLSPVK	Phospho(S)@8		-0.0008	1367.66	2	16	1.1.1.1550.7	Winner
0	99	NFVFHTLSPVK	Phospho(S)@8		-0.0008	1367.66	2	14	1.1.1.1555.10	Winner
0	99	NFVFHTLSPVK	Phospho(S)@8		-0.0008	1367.66	2	16	1.1.1.1561.6	Winner
0	99	NFVFHTLSPVK	Phospho(S)@8		0.0017	1367.67	2	15	1.1.1.1567.4	Winner
0	99	NFVFHTLSPVK	Phospho(S)@8		-0.0027	1367.66	2	14	1.1.1.1572.3	Winner
0	99	NFVFHTLSPVK	Phospho(S)@8		0.0021	1367.67	2	12	1.1.1.1579.4	Winner
0	99	NFVFHTLSPVK	Phospho(S)@8		0.0021	1367.67	2	11	1.1.1.1585.6	Winner
0	99	NFVFHTLSPVKAEAAK	Phospho(S)@8	missed K-A@11	-0.0009	1837.91	3	21	1.1.1.1444.12	Winner
0	99	NFVFHTLSPVKAEAAK	Phospho(S)@8	missed K-A@11	-0.0009	1837.91	3	22	1.1.1.1449.11	Winner
0	99	NFVFHTLSPVKAEAAK	Phospho(S)@8	missed K-A@11	-0.0009	1837.91	3	20	1.1.1.1459.9	Winner
0	93.2	NFVFHTLSPVKAEAAK	Phospho(S)@8	missed K-A@11	-0.0018	1837.91	3	11	1.1.1.1477.5	Winner
0	47.7	NFVFHTLSPVKAEAAK	Phospho(S)@8	missed K-A@11	-0.0009	1837.91	3	8	1.1.1.1443.16	Winner
0	< 1	FRASLVSSASKSSGK	Phospho(S)@8; Phospho(S)@12	cleaved L-F@N-term; missed R-A@2; missed K-S@11	0.0085	1670.75	2	6	1.1.1.1304.21	Winner
0	97.6	ETQIITGSDESCRK	Phospho(T)@2	missed R-K@13	-0.0096	1645.69	2	7	1.1.1.986.18	Winner
0	< 1	EGTAGKAKVKSK	Phospho(T)@3	missed K-A@6; missed K-V@8; missed K-S@10	0.024	1282.69	2	5	1.1.1.873.18	Winner
0	30.3	RFTLDR	Phospho(T)@3	missed R-F@1	0.0234	886.43	2	7	1.1.1.1068.5	Winner
0	< 1	KPRPTCHGNAMALLK	Phospho(T)@5		0.0104	1715.85	4	6	1.1.1.931.4	Winner
0	56.1	QPSKLDEDDSCSLLTK	Propionamide(C)@11	missed K-L@4	-0.0009	1848.88	3	10	1.1.1.1208.14	Winner
0	< 1	QPSKLDEDDSCSLLTK	Propionamide(C)@11	missed K-L@4	-0.0009	1848.88	3	6	1.1.1.1203.16	Winner
0	99	ETQIITGSDESCR	Propionamide(C)@12		0.0018	1508.68	2	12	1.1.1.1030.16	Winner
0	99	ETQIITGSDESCR	Propionamide(C)@12		0.0018	1508.68	2	20	1.1.1.1035.17	Winner
0	99	ETQIITGSDESCR	Propionamide(C)@12		0.0018	1508.68	2	15	1.1.1.1040.19	Winner
0	99	ETQIITGSDESCR	Propionamide(C)@12		0.0018	1508.68	2	11	1.1.1.1045.19	Winner
0	99	ETQIITGSDESCRK	Propionamide(C)@12	missed R-K@13	-0.0011	1636.77	3	14	1.1.1.931.15	Winner
0	99	ETQIITGSDESCRK	Propionamide(C)@12	missed R-K@13	0.0009	1636.77	2	20	1.1.1.932.20	Winner
0	99	ETQIITGSDESCRK	Propionamide(C)@12	missed R-K@13	0.0009	1636.77	2	15	1.1.1.933.21	Winner
0	99	ETQIITGSDESCRK	Propionamide(C)@12	missed R-K@13	0.0009	1636.77	2	16	1.1.1.935.19	Winner
0	99	ETQIITGSDESCRK	Propionamide(C)@12	missed R-K@13	0.0009	1636.77	2	17	1.1.1.936.21	Winner
0	99	ETQIITGSDESCRK	Propionamide(C)@12	missed R-K@13	-0.0011	1636.77	3	14	1.1.1.937.16	Winner
0	47.6	ETQIITGSDESCRK	Propionamide(C)@12	missed R-K@13	-0.0011	1636.77	3	9	1.1.1.944.13	Winner
0	28	ETQIITGSDESCRK	Propionamide(C)@12	missed R-K@13	0.0009	1636.77	2	8	1.1.1.926.21	Winner
0	83.6	ETQIITGSDESCR	Propionamide(C)@12; Oxidation(R)@13		-0.0009	1524.67	2	10	1.1.1.985.19	Winner
0	21.5	ETQIITGSDESCR	Propionamide(C)@12; Oxidation(R)@13		-0.0009	1524.67	2	8	1.1.1.991.19	Winner
0	99	SETDENSGKQPSKLDEDDSCSLLTK	Propionamide(C)@20	missed K-Q@9; missed K-L@13	0.0001	2796.26	4	15	1.1.1.1171.20	Winner
0	95	SETDENSGKQPSKLDEDDSCSLLTK	Propionamide(C)@20	missed K-Q@9; missed K-L@13	0.0001	2796.26	4	10	1.1.1.1165.20	Winner
0	51.1	SETDENSGKQPSKLDEDDSCSLLTK	Propionamide(C)@20	missed K-Q@9; missed K-L@13	0.0001	2796.26	4	8	1.1.1.1177.21	Winner
0	47.8	KPRPTCHGNAMALLK	Propionamide(C)@6; Oxidation(M)@11		0.0002	1722.9	4	10	1.1.1.855.2	Winner
0	< 1	KPRPTCHGNAMALLK	Propionamide(C)@6; Oxidation(M)@11		-0.0007	1722.9	3	6	1.1.1.851.16	Winner
2	99	LDEDDSCSLLTK	Propionamide(C)@7		0.0001	1408.64	2	12	1.1.1.1266.20	Winner
0	99	LDEDDSCSLLTK	Propionamide(C)@7		0.0001	1408.64	2	12	1.1.1.1256.19	Winner
0	99	LDEDDSCSLLTK	Propionamide(C)@7		0.0001	1408.64	2	13	1.1.1.1261.21	Winner
0	< 1	LDEDDSCSLLTK	Propionamide(C)@7; Phospho(S)@8		0.0047	1488.61	2	5	1.1.1.1437.21	Winner
0	< 1	LDEDDSCSLLTK	Propionamide(C)@7; Phospho(T)@11		0.0047	1488.61	2	6	1.1.1.1443.20	Winner
0	< 1	LDEDDSCSLLTK	Propionamide(C)@7; Phospho(T)@11		0.0047	1488.61	2	6	1.1.1.1453.15	Winner
0.56	99	QPSKLDEDDSCSLLTK	Trioxidation(C)@11	missed K-L@4	0.0001	1825.83	2	8	1.1.1.1208.20	Winner
0	< 1	QPSKLDEDDSCSLLTK	Trioxidation(C)@11	missed K-L@4	0.0001	1825.83	2	7	1.1.1.1213.21	Winner
0	99	ETQIITGSDESCRK	Trioxidation(C)@12	missed R-K@13	0.0014	1613.72	2	13	1.1.1.952.19	Winner
0	99	ETQIITGSDESCRK	Trioxidation(C)@12	missed R-K@13	0.0014	1613.72	2	17	1.1.1.958.21	Winner
0	96.8	ETQIITGSDESCRK	Trioxidation(C)@12; Delta:H(4)C(2)(K)@14	missed R-K@13	-0.0151	1641.74	2	10	1.1.1.999.21	Winner
0	99	ETQIITGSDESCR	Trioxidation(C)@12; Dimethyl(R)@13		-0.0162	1513.64	2	12	1.1.1.1112.20	Winner
0	99	ETQIITGSDESCR	Trioxidation(C)@12; Dimethyl(R)@13		-0.0162	1513.64	2	15	1.1.1.1118.20	Winner
0	99	ETQIITGSDESCRK	Trioxidation(C)@12; Formyl(K)@14	missed R-K@13	0.0212	1641.74	2	11	1.1.1.1000.21	Winner
0	92.4	ETQIITGSDESCRK	Trioxidation(C)@12; Formyl(K)@14	missed R-K@13	0.0179	1641.73	3	13	1.1.1.998.14	Winner
2	99	SETDENSGKQPSKLDEDDSCSLLTK	Trioxidation(C)@20	missed K-Q@9; missed K-L@13	0.0043	2773.21	3	15	1.1.1.1162.21	Winner
0	99	SETDENSGKQPSKLDEDDSCSLLTK	Trioxidation(C)@20	missed K-Q@9; missed K-L@13	0.0043	2773.21	3	13	1.1.1.1168.20	Winner
2	99	PTCHGNAMALLK	Trioxidation(C)@3; Oxidation(M)@8	cleaved R-P@N-term	0.0003	1318.6	2	17	1.1.1.1054.17	Winner
0	99	PTCHGNAMALLK	Trioxidation(C)@3; Oxidation(M)@8	cleaved R-P@N-term	0.0003	1318.6	2	15	1.1.1.1048.12	Winner
0	77	PTCHGNAMALLK	Trioxidation(C)@3; Oxidation(M)@8	cleaved R-P@N-term	0.0003	1318.6	2	8	1.1.1.1061.18	Winner
0	99	KPRPTCHGNAMALLK	Trioxidation(C)@6; Dioxidation(M)@11		0.0004	1715.85	3	16	1.1.1.930.15	Winner
0	99	KPRPTCHGNAMALLK	Trioxidation(C)@6; Oxidation(M)@11		0.0013	1699.85	3	14	1.1.1.899.16	Winner
0	99	KPRPTCHGNAMALLK	Trioxidation(C)@6; Oxidation(M)@11		0.0013	1699.85	3	22	1.1.1.905.14	Winner
0	99	LDEDDSCSLLTK	Trioxidation(C)@7		-0.0005	1385.59	2	9	1.1.1.1260.20	Winner
0.02	85.9	RKPRPTCHGNAMALLK	Trioxidation(C)@7; Oxidation(M)@12	missed R-K@1	0.0007	1855.95	3	11	1.1.1.855.14	Winner
0	54.1	RKPRPTCHGNAMALLK	Trioxidation(C)@7; Oxidation(M)@12	missed R-K@1	0.0007	1855.95	3	8	1.1.1.854.17	Winner
0	< 1	RKPRPTCHGNAMALLK	Trioxidation(C)@7; Oxidation(M)@12	missed R-K@1	0.0007	1855.95	3	7	1.1.1.856.18	Winner
2	99	AALSDHNPSAPR		cleaved L-A@N-term	0.0008	1234.61	2	13	1.1.1.1003.19	Winner
2	99	ADGDLHSDGPGR		cleaved L-A@N-term	0.0015	1195.52	2	14	1.1.1.1062.15	Winner
2	99	ADVVPVTLAPK			0.0012	1108.65	2	15	1.1.1.1347.15	Winner
2	99	ALEGEGPQNPEETDEKVEEPEQQNK		cleaved H-A@N-term; missed K-V@16	0.0005	2823.27	3	17	1.1.1.1111.21	Winner
2	99	ASLVSSASK			0.0013	848.462	2	11	1.1.1.832.2	Winner
2	99	AVGFLSVPK			0.0011	916.539	2	15	1.1.1.1415.5	Winner
2	99	DLVKNEELEIQEK		missed K-N@4	-0.0012	1585.82	3	19	1.1.1.1296.15	Winner
2	99	DSDDDQTEEQLDESEAR			-0.0014	1980.77	3	18	1.1.1.1075.18	Winner
2	99	EIIDTANTTEMNSDHHSK			0.0003	2041.9	4	17	1.1.1.1015.11	Winner
2	99	ESALNLPYHMPENK			0.0032	1641.79	2	14	1.1.1.1393.21	Winner
2	99	FTSQDASTPASSELNK			0.0019	1681.78	2	27	1.1.1.1086.21	Winner
2	99	FTSQDASTPASSELNKQEK		missed K-Q@16	-0.0004	2066.98	3	16	1.1.1.1067.20	Winner
2	99	GPSFMTSPSPK			0.001	1134.54	2	18	1.1.1.1156.10	Winner
2	99	GSEQTTGAENEVETNALPVVSK			-0.0013	2259.09	3	35	1.1.1.1371.19	Winner
2	99	GTSFFPTAGGFR			-0.0001	1243.6	2	19	1.1.1.1558.10	Winner
2	99	HLKTDDSTSGLTR		missed K-T@3	-0.0009	1429.72	2	14	1.1.1.824.18	Winner
2	99	KKEPSLESGVHSFEEGSELSK		missed K-K@1; missed K-E@2	0.0001	2303.13	4	13	1.1.1.1265.15	Winner
2	99	LAALSDHNPSAPR			0.0009	1347.69	3	18	1.1.1.1003.6	Winner
2	99	LKQLGVDVSIKPR		missed K-Q@2	-0.0004	1451.88	3	12	1.1.1.1219.14	Winner
2	99	MGYFPTEEKSETDENSGK		missed K-S@9	0.0004	2047.87	3	18	1.1.1.1167.18	Winner
2	99	NASRPMVIQESK			0.0012	1358.7	2	13	1.1.1.917.18	Winner
2	99	NEELEIQEK			-0.0003	1130.55	2	15	1.1.1.1052.14	Winner
2	99	NFVFHTLSPVK			-0.0005	1287.7	2	18	1.1.1.1423.13	Winner
2	99	NPFEAIRPGSAQQVK			-0.0005	1640.86	2	16	1.1.1.1249.21	Winner
2	99	NQYQALKPR			0.0005	1116.6	2	15	1.1.1.895.14	Winner
2	99	RGPSFMTSPSPK		missed R-G@1	-0.001	1290.64	2	12	1.1.1.1059.17	Winner
2	99	SLSSDSTLLLFK			0.0001	1309.71	2	17	1.1.1.1698.3	Winner
2	99	SSAVGPPEK			-0.0004	870.444	2	13	1.1.1.783.2	Winner
2	99	TDDSTSGLTR			-0.0003	1051.48	2	16	1.1.1.831.12	Winner
2	99	TIHDFFK			0.0007	906.461	2	11	1.1.1.1232.2	Winner
2	99	TMLDDDKR		missed K-R@7	-0.0018	992.458	2	10	1.1.1.815.6	Winner
2	99	TTYDSAEEENKENLYAGK		missed K-E@11	-0.0004	2060.92	3	14	1.1.1.1090.20	Winner
2	99	YLADGDLHSDGPGR			0.0003	1471.67	2	16	1.1.1.1053.19	Winner
1.85	98.8	IEREQWLR		missed R-E@3	0.0006	1128.6	2	10	1.1.1.1122.19	Winner
1.54	99	KDLVKNEELEIQEK		missed K-D@1; missed K-N@5	-0.0359	1713.88	2	11	1.1.1.1292.21	Winner
1.38	99	ALSDHNPSAPR		cleaved A-A@N-term	0.0023	1163.57	2	11	1.1.1.1008.14	Winner
1.24	95.2	EELKADVVPVTLAPK		missed K-A@4	-0.0016	1607.91	3	11	1.1.1.1409.10	Winner
0.95	99	PEETDEKVEEPEQQNK		cleaved N-P@N-term; missed K-V@7	0.0007	1927.87	3	10	1.1.1.878.14	Winner
0.8	99	LAALSDHN		cleaved N-P@C-term	0.0018	839.416	2	8	1.1.1.903.7	Winner
0.51	99	IHDFFK		cleaved T-I@N-term	0.0009	805.413	2	8	1.1.1.1219.2	Winner
0.46	69.9	QLGVDVSIKPR			0.0007	1210.7	3	8	1.1.1.1225.2	Winner
0.41	65.7	TIHDFFKR		missed K-R@7	-0.0005	1062.56	2	7	1.1.1.1117.17	Winner
0.3	55.2	ELEALKQR		missed K-Q@6	0.0007	985.557	2	6	1.1.1.915.13	Winner
0.19	39.8	RFTLDR		missed R-F@1	0.0004	806.44	2	8	1.1.1.958.3	Winner
0.12	27.2	AGQTVNVNVIVK			-0.0006	1240.71	2	6	1.1.1.1284.17	Winner
0.1	39.6	NPFEAIR		cleaved R-P@C-term	-0.0008	845.439	2	6	1.1.1.1220.5	Winner
0.03	38.6	ESALNLPY		cleaved Y-H@C-term	0.0002	905.45	2	7	1.1.1.1555.5	Winner
0.02	58.6	PFEAIRPGSAQQVK		cleaved N-P@N-term	0.002	1526.82	3	10	1.1.1.1116.14	Winner
0.01	21.9	SDHNPSAPR		cleaved L-S@N-term	0.0011	979.448	2	8	1.1.1.1003.11	Winner
0	63.1	YLADGDLHSD		cleaved D-G@C-term	-0.0013	1104.47	2	8	1.1.1.1081.12	Winner
0	50.3	AALSDHNPSAPR		cleaved L-A@N-term	0.0008	1234.61	2	7	1.1.1.1012.16	Winner
0	99	ADGDLHSDGPGR		cleaved L-A@N-term	0.0015	1195.52	2	12	1.1.1.1056.16	Winner
0	< 1	ADGDLHSDGPGR		cleaved L-A@N-term	0.0015	1195.52	2	5	1.1.1.1068.16	Winner
0	99	ADVVPVTLAPK			0.0013	1108.65	2	15	1.1.1.1337.15	Winner
0	99	ADVVPVTLAPK			0.0013	1108.65	2	16	1.1.1.1342.11	Winner
0	99	ADVVPVTLAPK			0.0012	1108.65	2	11	1.1.1.1352.15	Winner
0	14.7	ADVVPVTLAPK			0.0013	1108.65	2	6	1.1.1.1331.15	Winner
0	99	ALEGEGPQNPEETDEKVEEPEQQNK		cleaved H-A@N-term; missed K-V@16	0.0005	2823.27	3	12	1.1.1.1117.21	Winner
0	94.8	ALSDHNPSAPR		cleaved A-A@N-term	0.0023	1163.57	2	10	1.1.1.1002.16	Winner
0	99	ASLVSSASK			0.0013	848.462	2	8	1.1.1.821.3	Winner
0	99	ASLVSSASK			0.0013	848.462	2	11	1.1.1.826.3	Winner
0	99	ASLVSSASK			0.0013	848.462	2	10	1.1.1.838.4	Winner
0	99	ASLVSSASK			-0.0002	848.46	2	8	1.1.1.845.3	Winner
0	< 1	ASLVSSASK			0.0135	848.474	2	4	1.1.1.851.3	Winner
0	99	AVGFLSVPK			0.0013	916.539	2	12	1.1.1.1410.5	Winner
0	99	AVGFLSVPK			0.0011	916.539	2	15	1.1.1.1421.2	Winner
0	99	AVGFLSVPK			0.0011	916.539	2	15	1.1.1.1427.3	Winner
0	99	AVGFLSVPK			0.0013	916.539	2	13	1.1.1.1433.2	Winner
0	99	AVGFLSVPK			-0.0001	916.538	2	13	1.1.1.1439.4	Winner
0	99	AVGFLSVPK			-0.0001	916.538	2	12	1.1.1.1444.3	Winner
0	99	AVGFLSVPK			0.0001	916.538	2	10	1.1.1.1449.4	Winner
0	99	AVGFLSVPK			-0.0001	916.538	2	11	1.1.1.1454.4	Winner
0	97.9	AVGFLSVPK			-0.0001	916.538	2	7	1.1.1.1464.3	Winner
0	75.9	AVGFLSVPK			-0.0003	916.538	2	7	1.1.1.1469.2	Winner
0	66.4	AVGFLSVPK			0.0017	916.54	2	6	1.1.1.1459.4	Winner
0	39.6	AVGFLSVPK			0.0017	916.54	2	6	1.1.1.1484.4	Winner
0	< 1	AVGFLSVPK			-0.0083	916.53	2	4	1.1.1.1370.4	Winner
0	< 1	AVGFLSVPK			0.0021	916.54	2	5	1.1.1.1474.5	Winner
0	< 1	AVGFLSVPK			0.0017	916.54	2	4	1.1.1.1479.4	Winner
0	< 1	AVGFLSVPK			0.0017	916.54	2	5	1.1.1.1489.4	Winner
0	< 1	AVGFLSVPK			-0.0007	916.538	2	5	1.1.1.1494.4	Winner
0	< 1	AVGFLSVPK			-0.0003	916.538	2	4	1.1.1.1519.3	Winner
0	< 1	AVGFLSVPK			0.0005	916.539	2	3	1.1.1.1524.3	Winner
0	< 1	AVGFLSVPK			-0.0009	916.537	2	3	1.1.1.1554.2	Winner
0	< 1	AVGFLSVPK			0.0055	916.544	2	4	1.1.1.1566.3	Winner
0	< 1	AVGFLSVPK			0.0079	916.546	2	3	1.1.1.1605.4	Winner
0	< 1	AVGFLSVPK			0.0067	916.545	2	4	1.1.1.1617.4	Winner
0	99	DEKEMDKENNDGSSEIGK		missed K-E@3; missed K-E@7	0.0027	2023.87	4	12	1.1.1.858.13	Winner
0	87.2	DEKEMDKENNDGSSEIGK		missed K-E@3; missed K-E@7	0.0011	2023.87	3	9	1.1.1.857.19	Winner
0	< 1	DEKEMDKENNDGSSEIGK		missed K-E@3; missed K-E@7	0.0011	2023.87	3	5	1.1.1.864.19	Winner
0	99	DLVKNEELEIQEK		missed K-N@4	0.0012	1585.82	2	17	1.1.1.1287.19	Winner
0	99	DLVKNEELEIQEK		missed K-N@4	0.0012	1585.82	2	17	1.1.1.1288.18	Winner
0	99	DLVKNEELEIQEK		missed K-N@4	0.0012	1585.82	2	22	1.1.1.1289.20	Winner
0	99	DLVKNEELEIQEK		missed K-N@4	0.0012	1585.82	2	22	1.1.1.1290.20	Winner
0	99	DLVKNEELEIQEK		missed K-N@4	-0.0012	1585.82	3	18	1.1.1.1291.10	Winner
0	99	DLVKNEELEIQEK		missed K-N@4	0.0012	1585.82	2	22	1.1.1.1292.20	Winner
0	99	DLVKNEELEIQEK		missed K-N@4	0.0012	1585.82	2	23	1.1.1.1293.18	Winner
0	99	DLVKNEELEIQEK		missed K-N@4	0.0012	1585.82	2	23	1.1.1.1294.21	Winner
0	99	DLVKNEELEIQEK		missed K-N@4	0.0012	1585.82	2	22	1.1.1.1295.18	Winner
0	99	DLVKNEELEIQEK		missed K-N@4	0.0012	1585.82	2	23	1.1.1.1297.20	Winner
0	99	DLVKNEELEIQEK		missed K-N@4	0.0012	1585.82	2	23	1.1.1.1298.20	Winner
0	99	DLVKNEELEIQEK		missed K-N@4	0.0012	1585.82	2	22	1.1.1.1299.20	Winner
0	99	DLVKNEELEIQEK		missed K-N@4	0.0012	1585.82	2	22	1.1.1.1300.21	Winner
0	99	DLVKNEELEIQEK		missed K-N@4	-0.0008	1585.82	3	19	1.1.1.1301.13	Winner
0	99	DLVKNEELEIQEK		missed K-N@4	0.0012	1585.82	2	18	1.1.1.1302.21	Winner
0	99	DLVKNEELEIQEK		missed K-N@4	0.0012	1585.82	2	17	1.1.1.1304.20	Winner
0	99	DLVKNEELEIQEK		missed K-N@4	0.0012	1585.82	2	17	1.1.1.1305.21	Winner
0	99	DLVKNEELEIQEK		missed K-N@4	-0.0008	1585.82	3	17	1.1.1.1306.12	Winner
0	99	DLVKNEELEIQEK		missed K-N@4	-0.0003	1585.82	3	11	1.1.1.1311.12	Winner
0	80	DLVKNEELEIQEK		missed K-N@4	-0.0012	1585.82	3	10	1.1.1.1286.11	Winner
0	70	DLVKNEELEIQEK		missed K-N@4	0.0012	1585.82	2	6	1.1.1.1308.20	Winner
0	31.1	DLVKNEELEIQEK		missed K-N@4	0.001	1585.82	2	5	1.1.1.1309.20	Winner
0	81.1	DMGTDGKEELK		missed K-E@7	0.0007	1221.56	3	8	1.1.1.896.3	Winner
0	42.7	DMGTDGKEELK		missed K-E@7	0.0018	1221.56	2	7	1.1.1.897.18	Winner
0	99	DSDDDQTEEQLDESEAR			0.0029	1980.77	2	21	1.1.1.1070.21	Winner
0	99	DSDDDQTEEQLDESEAR			0.0029	1980.77	2	24	1.1.1.1075.21	Winner
0	99	DSDDDQTEEQLDESEAR			0.0029	1980.77	2	16	1.1.1.1081.21	Winner
0	52.8	EALKQLHSETQR		missed K-Q@4	0.0001	1438.75	3	9	1.1.1.859.11	Winner
0	< 1	EALKQLHSETQR		missed K-Q@4	0.0001	1438.75	3	5	1.1.1.865.11	Winner
0	73.8	EELKADVVPVTLAPK		missed K-A@4	-0.0016	1607.91	3	10	1.1.1.1414.9	Winner
0	99	EIIDTANTTEMNSDHHSK			0.0003	2041.9	4	14	1.1.1.1009.14	Winner
0	99	EIIDTANTTEMNSDHHSK			0.0034	2041.9	3	19	1.1.1.1009.21	Winner
0	99	EIIDTANTTEMNSDHHSK			0.0034	2041.9	3	17	1.1.1.1016.18	Winner
0	99	EIIDTANTTEMNSDHHSK			0.0034	2041.9	3	16	1.1.1.1017.20	Winner
0	99	EIIDTANTTEMNSDHHSK			0.0034	2041.9	3	17	1.1.1.1018.20	Winner
0	99	EIIDTANTTEMNSDHHSK			0.0034	2041.9	3	12	1.1.1.1019.21	Winner
0	99	EIIDTANTTEMNSDHHSK			0.0034	2041.9	3	14	1.1.1.1020.21	Winner
0	34.1	EIIDTANTTEMNSDHHSK			0.0003	2041.9	4	9	1.1.1.1021.11	Winner
0	< 1	EKVEEPEQQNK		cleaved D-E@N-term; missed K-V@2	0.0035	1356.66	3	7	1.1.1.738.3	Winner
0	8.9	ELEALKQR		missed K-Q@6	0.0007	985.557	2	5	1.1.1.909.12	Winner
0	< 1	ELEALKQR		missed K-Q@6	-0.0001	985.556	2	4	1.1.1.938.14	Winner
0	77.2	EMDKENNDGSSEIGK		missed K-E@4	-0.0023	1651.7	3	10	1.1.1.824.12	Winner
0	75.1	EMDKENNDGSSEIGK		missed K-E@4	-0.0023	1651.7	3	10	1.1.1.819.9	Winner
0	< 1	EMDKENNDGSSEIGK		missed K-E@4	-0.0023	1651.7	3	3	1.1.1.829.13	Winner
0	< 1	EREQWLR		cleaved I-E@N-term; missed R-E@2	-0.0002	1015.52	2	7	1.1.1.1119.8	Winner
0	< 1	ESALNLPY		cleaved Y-H@C-term	0.0005	905.45	2	4	1.1.1.1550.3	Winner
0	99	ESALNLPYHMPENK			0.0032	1641.79	2	11	1.1.1.1389.16	Winner
0	99	ESALNLPYHMPENK			0.0003	1641.78	3	14	1.1.1.1395.12	Winner
0	99	ESALNLPYHMPENK			0.0032	1641.79	2	15	1.1.1.1396.20	Winner
0	99	ESALNLPYHMPENK			0.0032	1641.79	2	13	1.1.1.1397.20	Winner
0	99	ESALNLPYHMPENK			0.0032	1641.79	2	11	1.1.1.1398.21	Winner
0	99	ESALNLPYHMPENK			0.0032	1641.79	2	10	1.1.1.1399.20	Winner
0	99	ESALNLPYHMPENK			0.0003	1641.78	3	14	1.1.1.1400.11	Winner
0	97.2	ESALNLPYHMPENK			0.0003	1641.78	3	10	1.1.1.1405.12	Winner
0	96.8	ESALNLPYHMPENK			0.0003	1641.78	3	11	1.1.1.1390.15	Winner
0	32.7	ESALNLPYHMPENK			0.0003	1641.78	3	7	1.1.1.1385.13	Winner
0	< 1	EVETNALPVVSK		cleaved N-E@N-term	-0.0006	1284.69	2	6	1.1.1.1239.11	Winner
0	< 1	FEAIRPGSAQQVK		cleaved P-F@N-term	-0.0001	1429.77	3	7	1.1.1.1052.6	Winner
0	99	FTSQDASTPASSELNK			0.0019	1681.78	2	27	1.1.1.1091.21	Winner
0	99	FTSQDASTPASSELNK			0.0019	1681.78	2	26	1.1.1.1096.21	Winner
0	99	FTSQDASTPASSELNK			0.0019	1681.78	2	15	1.1.1.1101.21	Winner
0	41.5	FTSQDASTPASSELNK			0.0017	1681.78	2	7	1.1.1.1106.21	Winner
0	99	FTSQDASTPASSELNKQEK		missed K-Q@16	0.0022	2066.98	3	23	1.1.1.1051.19	Winner
0	99	FTSQDASTPASSELNKQEK		missed K-Q@16	0.0036	2066.98	2	10	1.1.1.1053.21	Winner
0	99	FTSQDASTPASSELNKQEK		missed K-Q@16	0.0022	2066.98	3	23	1.1.1.1057.16	Winner
0	99	FTSQDASTPASSELNKQEK		missed K-Q@16	-0.0005	2066.98	3	13	1.1.1.1073.20	Winner
0	97.6	FTSQDASTPASSELNKQEK		missed K-Q@16	0.0036	2066.98	2	8	1.1.1.1054.21	Winner
0	95.6	FTSQDASTPASSELNKQEK		missed K-Q@16	0.0036	2066.98	2	8	1.1.1.1055.21	Winner
0	95.6	FTSQDASTPASSELNKQEK		missed K-Q@16	0.0036	2066.98	2	8	1.1.1.1056.21	Winner
0	92.3	FTSQDASTPASSELNKQEK		missed K-Q@16	-0.0004	2066.98	3	9	1.1.1.1045.16	Winner
0	44.6	FTSQDASTPASSELNKQEK		missed K-Q@16	0.0036	2066.98	2	7	1.1.1.1060.21	Winner
0	< 1	FTSQDASTPASSELNKQEK		missed K-Q@16	0.0036	2066.98	2	6	1.1.1.1058.21	Winner
0	< 1	FTSQDASTPASSELNKQEK		missed K-Q@16	0.0036	2066.98	2	4	1.1.1.1059.21	Winner
0	< 1	FTSQDASTPASSELNKQEK		missed K-Q@16	0.0036	2066.98	2	3	1.1.1.1061.21	Winner
0	99	GPSFMTSPSPK			0.0008	1134.54	2	16	1.1.1.1150.12	Winner
0	98.6	GPSFMTSPSPK			0.0008	1134.54	2	11	1.1.1.1144.6	Winner
0	98.4	GPSFMTSPSPK			0.0005	1134.54	2	10	1.1.1.1168.13	Winner
0	98.1	GPSFMTSPSPK			0.0008	1134.54	2	10	1.1.1.1162.12	Winner
0	99	GSEQTTGAENEVETNALPVVSK			-0.0013	2259.09	3	17	1.1.1.1366.19	Winner
0	99	GSEQTTGAENEVETNALPVVSK			0.0019	2259.09	2	14	1.1.1.1368.21	Winner
0	99	GSEQTTGAENEVETNALPVVSK			0.0019	2259.09	2	20	1.1.1.1369.21	Winner
0	99	GSEQTTGAENEVETNALPVVSK			0.0019	2259.09	2	21	1.1.1.1370.21	Winner
0	99	GSEQTTGAENEVETNALPVVSK			0.0019	2259.09	2	26	1.1.1.1372.21	Winner
0	99	GSEQTTGAENEVETNALPVVSK			0.0019	2259.09	2	22	1.1.1.1373.21	Winner
0	99	GSEQTTGAENEVETNALPVVSK			0.0019	2259.09	2	24	1.1.1.1374.21	Winner
0	99	GSEQTTGAENEVETNALPVVSK			-0.0013	2259.09	3	27	1.1.1.1379.17	Winner
0	99	GSEQTTGAENEVETNALPVVSK			0.0019	2259.09	2	12	1.1.1.1380.21	Winner
0	99	GSEQTTGAENEVETNALPVVSK			0.0019	2259.09	2	12	1.1.1.1381.17	Winner
0	99	GSEQTTGAENEVETNALPVVSK			0.0019	2259.09	2	10	1.1.1.1382.19	Winner
0	99	GSEQTTGAENEVETNALPVVSK			-0.001	2259.09	3	22	1.1.1.1384.13	Winner
0	99	GTSFFPTAGGFR			0.0001	1243.6	2	14	1.1.1.1543.5	Winner
0	99	GTSFFPTAGGFR			-0.0001	1243.6	2	20	1.1.1.1548.6	Winner
0	99	GTSFFPTAGGFR			-0.0001	1243.6	2	19	1.1.1.1553.9	Winner
0	99	GTSFFPTAGGFR			-0.0001	1243.6	2	19	1.1.1.1564.6	Winner
0	99	GTSFFPTAGGFR			-0.0001	1243.6	2	19	1.1.1.1569.5	Winner
0	99	GTSFFPTAGGFR			0.0001	1243.6	2	19	1.1.1.1574.3	Winner
0	99	GTSFFPTAGGFR			0.0001	1243.6	2	17	1.1.1.1580.3	Winner
0	98.9	GTSFFPTAGGFR			0.0001	1243.6	2	11	1.1.1.1585.4	Winner
0	97.8	GTSFFPTAGGFR			-0.0004	1243.6	2	11	1.1.1.1590.2	Winner
0	97	GTSFFPTAGGFR			0.0001	1243.6	2	10	1.1.1.1538.6	Winner
0	86.7	GTSFFPTAGGFR			0.0003	1243.6	2	8	1.1.1.1530.8	Winner
0	84	GTSFFPTAGGFR			0.0003	1243.6	2	9	1.1.1.1596.4	Winner
0	99	HLKTDDSTSGLTR		missed K-T@3	0.0006	1429.72	3	11	1.1.1.820.10	Winner
0	99	HLKTDDSTSGLTR		missed K-T@3	-0.0009	1429.72	2	10	1.1.1.823.15	Winner
0	99	HLKTDDSTSGLTR		missed K-T@3	0.0006	1429.72	3	20	1.1.1.825.7	Winner
0	99	HLKTDDSTSGLTR		missed K-T@3	-0.0009	1429.72	2	10	1.1.1.826.19	Winner
0	99	HLKTDDSTSGLTR		missed K-T@3	-0.0009	1429.72	2	12	1.1.1.828.20	Winner
0	99	HLKTDDSTSGLTR		missed K-T@3	-0.0009	1429.72	2	10	1.1.1.829.20	Winner
0	99	HLKTDDSTSGLTR		missed K-T@3	0.0006	1429.72	3	16	1.1.1.831.7	Winner
0	98.9	HLKTDDSTSGLTR		missed K-T@3	-0.0009	1429.72	2	9	1.1.1.827.17	Winner
0	98.2	HLKTDDSTSGLTR		missed K-T@3	-0.0009	1429.72	2	8	1.1.1.830.12	Winner
0	< 1	HLKTDDSTSGLTR		missed K-T@3	0.0006	1429.72	3	6	1.1.1.837.9	Winner
0	60.5	IEREQWLR		missed R-E@3	0.0006	1128.6	2	9	1.1.1.1116.17	Winner
0	47.6	IEREQWLR		missed R-E@3	0.0006	1128.6	2	7	1.1.1.1127.20	Winner
0	95.9	IHDFFK		cleaved T-I@N-term	0.0009	805.413	2	8	1.1.1.1214.2	Winner
0	< 1	IHDFFK		cleaved T-I@N-term	0.0007	805.413	2	6	1.1.1.1209.2	Winner
0	< 1	IHDFFK		cleaved T-I@N-term	0.0009	805.413	2	6	1.1.1.1224.2	Winner
0	< 1	IHDFFK		cleaved T-I@N-term	0.0009	805.413	2	6	1.1.1.1229.2	Winner
0	99	KDLVKNEELEIQEK		missed K-D@1; missed K-N@5	0.0005	1713.92	3	17	1.1.1.1126.11	Winner
0	99	KDLVKNEELEIQEK		missed K-D@1; missed K-N@5	0.0005	1713.92	3	19	1.1.1.1131.14	Winner
0	96.1	KDLVKNEELEIQEK		missed K-D@1; missed K-N@5	0.0005	1713.92	3	11	1.1.1.1137.10	Winner
0	98.7	KKEPSLESGVHSFEEGSELSK		missed K-K@1; missed K-E@2	0.0001	2303.13	4	12	1.1.1.1270.15	Winner
0	24.2	KKEPSLESGVHSFEEGSELSK		missed K-K@1; missed K-E@2	0.0001	2303.13	4	8	1.1.1.1260.16	Winner
0	< 1	KKEPSLESGVHSFEEGSELSK		missed K-K@1; missed K-E@2	-0.0033	2303.12	4	4	1.1.1.1277.15	Winner
0	99	KRGPSFMTSPSPK		missed K-R@1; missed R-G@2	0.0007	1418.73	3	13	1.1.1.940.7	Winner
0	19.6	KRGPSFMTSPSPK		missed K-R@1; missed R-G@2	0.0007	1418.73	3	7	1.1.1.934.9	Winner
0	< 1	KRGPSFMTSPSPK		missed K-R@1; missed R-G@2	0.0007	1418.73	3	7	1.1.1.945.9	Winner
0	1.3	LAALSDHN		cleaved N-P@C-term	0.0018	839.416	2	6	1.1.1.909.4	Winner
0	< 1	LAALSDHN		cleaved N-P@C-term	-0.0006	839.413	2	5	1.1.1.897.3	Winner
0	99	LAALSDHNPSAPR			0.0009	1347.69	3	12	1.1.1.998.6	Winner
0	99	LAALSDHNPSAPR			0.0021	1347.69	2	19	1.1.1.1000.17	Winner
0	99	LAALSDHNPSAPR			0.0021	1347.69	2	18	1.1.1.1001.19	Winner
0	99	LAALSDHNPSAPR			0.0021	1347.69	2	22	1.1.1.1002.19	Winner
0	99	LAALSDHNPSAPR			0.0009	1347.69	3	18	1.1.1.1009.5	Winner
0	99	LAALSDHNPSAPR			0.0021	1347.69	2	20	1.1.1.1011.20	Winner
0	99	LAALSDHNPSAPR			0.0021	1347.69	2	20	1.1.1.1012.19	Winner
0	99	LAALSDHNPSAPR			0.0021	1347.69	2	11	1.1.1.1014.18	Winner
0	99	LAALSDHNPSAPR			0.0009	1347.69	3	15	1.1.1.1015.4	Winner
0	99	LAALSDHNPSAPR			0.0021	1347.69	2	11	1.1.1.1017.19	Winner
0	99	LAALSDHNPSAPR			0.0004	1347.69	3	14	1.1.1.1021.4	Winner
0	99	LAALSDHNPSAPR			-0.0003	1347.69	3	11	1.1.1.1029.5	Winner
0	98.7	LAALSDHNPSAPR			0.0004	1347.69	3	11	1.1.1.1034.9	Winner
0	52.5	LAALSDHNPSAPR			-0.0315	1347.66	3	8	1.1.1.1107.8	Winner
0	35	LAALSDHNPSAPR			-0.0006	1347.69	3	8	1.1.1.1039.7	Winner
0	< 1	LAALSDHNPSAPR			0.0009	1347.69	3	5	1.1.1.1008.7	Winner
0	< 1	LAALSDHNPSAPR			-0.0095	1347.68	3	6	1.1.1.1070.7	Winner
0	< 1	LAALSDHNPSAPR			-0.0306	1347.66	3	6	1.1.1.1113.4	Winner
0	< 1	LEKEER		missed K-E@3	0.006	802.424	2	3	1.1.1.898.3	Winner
0	99	LKQLGVDVSIKPR		missed K-Q@2	-0.0004	1451.88	3	11	1.1.1.1214.13	Winner
0	99	MGYFPTEEK			-0.0007	1100.48	2	14	1.1.1.1246.15	Winner
0	99	MGYFPTEEK			-0.0007	1100.48	2	13	1.1.1.1251.12	Winner
0	99	MGYFPTEEK			-0.0007	1100.48	2	12	1.1.1.1256.12	Winner
0	98.9	MGYFPTEEK			-0.0007	1100.48	2	11	1.1.1.1253.8	Winner
0	98.9	MGYFPTEEK			-0.0007	1100.48	2	10	1.1.1.1261.11	Winner
0	96	MGYFPTEEK			-0.0007	1100.48	2	10	1.1.1.1248.14	Winner
0	51.5	MGYFPTEEK			-0.0002	1100.48	2	8	1.1.1.1266.9	Winner
0	46	MGYFPTEEK			-0.0007	1100.48	2	8	1.1.1.1240.16	Winner
0	< 1	MGYFPTEEK			-0.0163	1100.47	2	4	1.1.1.1279.13	Winner
0	99	MGYFPTEEKSETDENSGK		missed K-S@9	0.0004	2047.87	3	16	1.1.1.1161.18	Winner
0	99	NASRPMVIQESK			0.0017	1358.7	3	14	1.1.1.920.8	Winner
0	99	NASRPMVIQESK			0.0012	1358.7	2	11	1.1.1.923.15	Winner
0	99	NASRPMVIQESK			0.0017	1358.7	3	13	1.1.1.925.9	Winner
0	< 1	NASRPMVIQESK			0.002	1358.7	3	6	1.1.1.914.10	Winner
0	99	NEELEIQEK			-0.0003	1130.55	2	15	1.1.1.1058.14	Winner
0	99	NEELEIQEK			-0.0003	1130.55	2	12	1.1.1.1064.17	Winner
0	99	NEELEIQEK			-0.0005	1130.55	2	10	1.1.1.1070.14	Winner
0	97.6	NEELEIQEK			0.0005	1130.55	2	8	1.1.1.1075.14	Winner
0	43.4	NEELEIQEK			0.0095	1130.56	2	6	1.1.1.1081.13	Winner
0	99	NFVFHTLSPVK			0.0001	1287.7	3	14	1.1.1.1418.2	Winner
0	99	NFVFHTLSPVK			0.0001	1287.7	3	12	1.1.1.1424.2	Winner
0	99	NFVFHTLSPVK			0.0001	1287.7	3	12	1.1.1.1430.3	Winner
0	99	NFVFHTLSPVK			-0.0031	1287.69	2	13	1.1.1.1442.15	Winner
0	97.2	NFVFHTLSPVK			-0.0002	1287.7	3	9	1.1.1.1412.3	Winner
0	54.1	NFVFHTLSPVK			-0.0002	1287.7	3	9	1.1.1.1436.3	Winner
0	< 1	NFVFHTLSPVK			0.0017	1287.7	2	6	1.1.1.1447.13	Winner
0	< 1	NFVFHTLSPVK			0.0061	1287.7	2	4	1.1.1.1452.12	Winner
0	< 1	NFVFHTLSPVK			0.0067	1287.7	2	4	1.1.1.1457.10	Winner
0	98.8	NIDDASQMDLFHR			0.0026	1560.7	3	11	1.1.1.1421.6	Winner
0	69.3	NIDDASQMDLFHR			0.0026	1560.7	3	9	1.1.1.1414.7	Winner
0	37.6	NPFEAIR		cleaved R-P@C-term	-0.0005	845.439	2	6	1.1.1.1225.5	Winner
0	31.6	NPFEAIR		cleaved R-P@C-term	-0.0005	845.439	2	6	1.1.1.1230.4	Winner
0	99	NPFEAIRPGSAQQVK			-0.0002	1640.86	2	16	1.1.1.1230.20	Winner
0	99	NPFEAIRPGSAQQVK			-0.0018	1640.86	3	15	1.1.1.1236.14	Winner
0	99	NPFEAIRPGSAQQVK			-0.0002	1640.86	2	23	1.1.1.1238.19	Winner
0	99	NPFEAIRPGSAQQVK			-0.0002	1640.86	2	22	1.1.1.1239.21	Winner
0	99	NPFEAIRPGSAQQVK			-0.0002	1640.86	2	23	1.1.1.1240.20	Winner
0	99	NPFEAIRPGSAQQVK			-0.0002	1640.86	2	22	1.1.1.1241.21	Winner
0	99	NPFEAIRPGSAQQVK			-0.0018	1640.86	3	14	1.1.1.1242.13	Winner
0	99	NPFEAIRPGSAQQVK			-0.0002	1640.86	2	21	1.1.1.1244.20	Winner
0	99	NPFEAIRPGSAQQVK			-0.0002	1640.86	2	19	1.1.1.1245.20	Winner
0	99	NPFEAIRPGSAQQVK			-0.0002	1640.86	2	19	1.1.1.1246.19	Winner
0	99	NPFEAIRPGSAQQVK			-0.0002	1640.86	2	19	1.1.1.1247.21	Winner
0	99	NPFEAIRPGSAQQVK			-0.0016	1640.86	3	14	1.1.1.1248.13	Winner
0	99	NPFEAIRPGSAQQVK			-0.0005	1640.86	2	14	1.1.1.1250.21	Winner
0	96	NPFEAIRPGSAQQVK			-0.0018	1640.86	3	11	1.1.1.1253.7	Winner
0	85.9	NPFEAIRPGSAQQVK			0.0001	1640.86	2	7	1.1.1.1254.20	Winner
0	78.9	NPFEAIRPGSAQQVK			-0.0022	1640.86	3	10	1.1.1.1258.11	Winner
0	74.1	NPFEAIRPGSAQQVK			-0.0022	1640.86	3	10	1.1.1.1229.16	Winner
0	51.3	NPFEAIRPGSAQQVK			-0.0002	1640.86	2	7	1.1.1.1252.21	Winner
0	10.7	NPFEAIRPGSAQQVK			-0.0022	1640.86	3	7	1.1.1.1226.13	Winner
0	< 1	NPFEAIRPGSAQQVK			-0.0027	1640.86	3	4	1.1.1.1283.12	Winner
0	99	NQYQALKPR			0.0005	1116.6	2	12	1.1.1.889.12	Winner
0	99	NQYQALKPR			0.0005	1116.6	2	13	1.1.1.900.15	Winner
0	99	NQYQALKPR			0.0005	1116.6	2	8	1.1.1.906.16	Winner
0	47.5	PEETDEKVEEPEQQNK		cleaved N-P@N-term; missed K-V@7	0.0007	1927.87	3	7	1.1.1.883.19	Winner
0	99	PMVIQESK		cleaved R-P@N-term	-0.0019	930.482	2	12	1.1.1.954.11	Winner
0	94.2	PMVIQESK		cleaved R-P@N-term	-0.0019	930.482	2	9	1.1.1.960.10	Winner
0	62	QLGVDVSIKPR			0.0007	1210.7	3	8	1.1.1.1230.2	Winner
0	51.1	QLGVDVSIKPR			0.0007	1210.7	3	7	1.1.1.1220.2	Winner
0	< 1	QYQALKPR		cleaved N-Q@N-term	0.001	1002.56	2	6	1.1.1.891.11	Winner
0	38	RFTLDR		missed R-F@1	0.0004	806.44	2	8	1.1.1.948.3	Winner
0	37.8	RFTLDR		missed R-F@1	0.0004	806.44	2	8	1.1.1.954.2	Winner
0	33.5	RFTLDR		missed R-F@1	0.0004	806.44	2	8	1.1.1.952.2	Winner
0	99	RGPSFMTSPSPK		missed R-G@1	-0.001	1290.64	2	10	1.1.1.1051.17	Winner
0	99	RGPSFMTSPSPK		missed R-G@1	-0.0003	1290.64	3	12	1.1.1.1057.4	Winner
0	99	RGPSFMTSPSPK		missed R-G@1	-0.001	1290.64	2	15	1.1.1.1058.18	Winner
0	99	RGPSFMTSPSPK		missed R-G@1	-0.001	1290.64	2	11	1.1.1.1060.16	Winner
0	99	RGPSFMTSPSPK		missed R-G@1	-0.001	1290.64	2	11	1.1.1.1061.17	Winner
0	93.3	RGPSFMTSPSPK		missed R-G@1	-0.9953	1289.64	3	10	1.1.1.1063.5	Winner
0	82	RGPSFMTSPSPK		missed R-G@1	-0.001	1290.64	2	7	1.1.1.1062.18	Winner
0	< 1	RGPSFMTSPSPK		missed R-G@1	-0.001	1290.64	2	5	1.1.1.1063.19	Winner
0	< 1	SLLNQPK		cleaved G-S@N-term	-0.0137	798.446	2	6	1.1.1.959.2	Winner
0	99	SLSSDSTLLLFK			0.0004	1309.71	2	16	1.1.1.1693.4	Winner
0	99	SLSSDSTLLLFK			0.0005	1309.71	2	17	1.1.1.1708.2	Winner
0	99	SLSSDSTLLLFK			0.0004	1309.71	2	21	1.1.1.1718.3	Winner
0	99	SLSSDSTLLLFK			0.0004	1309.71	2	20	1.1.1.1723.3	Winner
0	99	SLSSDSTLLLFK			0.0004	1309.71	2	20	1.1.1.1728.2	Winner
0	99	SLSSDSTLLLFK			0.0004	1309.71	2	19	1.1.1.1733.2	Winner
0	99	SLSSDSTLLLFK			0.0001	1309.71	2	19	1.1.1.1738.3	Winner
0	99	SLSSDSTLLLFK			0.0004	1309.71	2	17	1.1.1.1749.3	Winner
0	99	SPSPGLFR			0.002	859.457	2	12	1.1.1.1158.3	Winner
0	99	SPSPGLFR			0.002	859.457	2	12	1.1.1.1164.4	Winner
0	99	SPSPGLFR			0.0018	859.457	2	11	1.1.1.1176.4	Winner
0	99	SPSPGLFR			0.002	859.457	2	10	1.1.1.1181.3	Winner
0	98.5	SPSPGLFR			0.0021	859.457	2	9	1.1.1.1152.4	Winner
0	98.3	SPSPGLFR			0.002	859.457	2	11	1.1.1.1170.4	Winner
0	97.6	SPSPGLFR			-0.0004	859.455	2	9	1.1.1.1187.5	Winner
0	85.2	SPSPGLFR			0.002	859.457	2	8	1.1.1.1185.2	Winner
0	84.7	SPSPGLFR			0.0016	859.457	2	7	1.1.1.1195.3	Winner
0	60.3	SPSPGLFR			0.0016	859.457	2	7	1.1.1.1193.5	Winner
0	< 1	SPSPGLFR			0.0018	859.457	2	4	1.1.1.1274.3	Winner
0	< 1	SPSPGLFR			0.0018	859.457	2	3	1.1.1.1276.4	Winner
0	< 1	SPSPGLFR			0.002	859.457	2	4	1.1.1.1301.3	Winner
0	99	SSAVGPPEK			-0.0004	870.444	2	13	1.1.1.788.3	Winner
0	99	SSAVGPPEK			-0.0004	870.444	2	13	1.1.1.794.3	Winner
0	99	SSAVGPPEK			-0.0018	870.443	2	12	1.1.1.800.3	Winner
0	99	SSAVGPPEK			-0.0004	870.444	2	9	1.1.1.806.2	Winner
0	96.5	SSAVGPPEK			0	870.445	2	5	1.1.1.823.3	Winner
0	93.6	SSAVGPPEK			-0.0001	870.445	2	6	1.1.1.818.2	Winner
0	< 1	SSAVGPPEK			0.0002	870.445	2	4	1.1.1.829.4	Winner
0	< 1	SSAVGPPEK			0.0002	870.445	2	4	1.1.1.835.3	Winner
0	< 1	SSAVGPPEK			0.0223	870.467	2	3	1.1.1.988.5	Winner
0	99	TDDSTSGLTR			-0.0003	1051.48	2	15	1.1.1.825.9	Winner
0	99	TDDSTSGLTR			-0.0003	1051.48	2	16	1.1.1.837.14	Winner
0	99	TDDSTSGLTR			-0.0007	1051.48	2	13	1.1.1.843.15	Winner
0	99	TDDSTSGLTR			-0.0007	1051.48	2	9	1.1.1.850.12	Winner
0	99	TDDSTSGLTR			0.0017	1051.48	2	9	1.1.1.856.12	Winner
0	99	TDDSTSGLTR			0.0019	1051.48	2	10	1.1.1.861.12	Winner
0	99	TDDSTSGLTR			0.0019	1051.48	2	11	1.1.1.867.12	Winner
0	96.5	TDDSTSGLTR			0.0059	1051.48	2	8	1.1.1.817.15	Winner
0	95.9	TDDSTSGLTR			-0.0003	1051.48	2	7	1.1.1.824.11	Winner
0	< 1	TDDSTSGLTR			0.0149	1051.49	2	4	1.1.1.949.10	Winner
0	99	TGSLLNQPK			-0.0005	956.529	2	14	1.1.1.965.8	Winner
0	99	TGSLLNQPK			-0.0007	956.529	2	14	1.1.1.971.9	Winner
0	99	TGSLLNQPK			-0.0007	956.529	2	14	1.1.1.977.8	Winner
0	99	TGSLLNQPK			-0.0007	956.529	2	14	1.1.1.983.8	Winner
0	99	TGSLLNQPK			-0.0007	956.529	2	14	1.1.1.989.8	Winner
0	99	TGSLLNQPK			-0.0009	956.528	2	12	1.1.1.994.10	Winner
0	98.9	TGSLLNQPK			-0.0005	956.529	2	10	1.1.1.999.6	Winner
0	97.3	TGSLLNQPK			-0.0011	956.528	2	9	1.1.1.959.7	Winner
0	97.3	TGSLLNQPK			-0.0007	956.529	2	9	1.1.1.1004.7	Winner
0	< 1	TGSLLNQPK			-0.0007	956.529	2	3	1.1.1.996.10	Winner
0	99	TIHDFFK			0.0005	906.46	2	11	1.1.1.1207.7	Winner
0	99	TIHDFFK			0.0007	906.461	2	11	1.1.1.1227.2	Winner
0	99	TIHDFFK			0.0007	906.461	2	10	1.1.1.1244.3	Winner
0	98.8	TIHDFFK			0.0005	906.46	2	11	1.1.1.1222.4	Winner
0	98.5	TIHDFFK			0.0005	906.46	2	11	1.1.1.1212.4	Winner
0	98.5	TIHDFFK			0.0005	906.46	2	11	1.1.1.1217.3	Winner
0	97.9	TIHDFFK			0.0007	906.461	2	10	1.1.1.1238.3	Winner
0	65.1	TIHDFFK			0.0003	906.46	2	8	1.1.1.1250.3	Winner
0	12.7	TIHDFFK			0.0009	906.461	2	5	1.1.1.1265.6	Winner
0	< 1	TIHDFFK			0.0003	906.46	2	5	1.1.1.1202.6	Winner
0	< 1	TIHDFFK			0.0001	906.46	2	4	1.1.1.1255.3	Winner
0	< 1	TIHDFFK			0.0005	906.46	2	5	1.1.1.1260.4	Winner
0	< 1	TIHDFFK			0.0009	906.461	2	3	1.1.1.1270.5	Winner
0	< 1	TIHDFFK			-0.0015	906.458	2	3	1.1.1.1275.4	Winner
0	< 1	TIHDFFK			0.0011	906.461	2	4	1.1.1.1286.7	Winner
0	18	TIHDFFKR		missed K-R@7	-0.0005	1062.56	2	7	1.1.1.1111.15	Winner
0	< 1	TIHDFFKR		missed K-R@7	-0.0005	1062.56	2	5	1.1.1.1106.12	Winner
0	< 1	TIHDFFKR		missed K-R@7	-0.0027	1062.56	2	5	1.1.1.1122.16	Winner
0	99	TMLDDDKR		missed K-R@7	0	992.46	2	9	1.1.1.820.12	Winner
0	80.4	TMLDDDKR		missed K-R@7	-0.0018	992.458	2	9	1.1.1.825.8	Winner
0	22.3	TMLDDDKR		missed K-R@7	-0.0018	992.458	2	5	1.1.1.826.9	Winner
0	99	TTYDSAEEENKENLYAGK		missed K-E@11	2.9451	2063.86	3	13	1.1.1.1084.19	Winner
0	99	TVADSDESYMEK			0.0009	1373.57	2	16	1.1.1.1032.18	Winner
0	99	TVADSDESYMEK			0.0009	1373.57	2	18	1.1.1.1037.18	Winner
0	99	TVADSDESYMEK			0.0009	1373.57	2	20	1.1.1.1042.17	Winner
0	99	TVADSDESYMEK			0.0009	1373.57	2	21	1.1.1.1047.6	Winner
0	99	TVADSDESYMEK			0.0011	1373.57	2	10	1.1.1.1053.18	Winner
0	42.8	YLADGDLHSD		cleaved D-G@C-term	-0.0013	1104.47	2	8	1.1.1.1075.12	Winner
0	< 1	YLADGDLHSD		cleaved D-G@C-term	-0.0013	1104.47	2	6	1.1.1.1070.13	Winner
0	99	YLADGDLHSDGPGR			0.0005	1471.67	3	13	1.1.1.1035.7	Winner
0	99	YLADGDLHSDGPGR			0.0005	1471.67	3	15	1.1.1.1040.9	Winner
0	99	YLADGDLHSDGPGR			0.0035	1471.67	2	10	1.1.1.1041.17	Winner
0	99	YLADGDLHSDGPGR			0.0005	1471.67	3	14	1.1.1.1045.9	Winner
0	99	YLADGDLHSDGPGR			0.0005	1471.67	3	14	1.1.1.1057.9	Winner
0	99	YLADGDLHSDGPGR			0.0005	1471.67	3	17	1.1.1.1059.8	Winner
0	99	YLADGDLHSDGPGR			0.0005	1471.67	3	18	1.1.1.1065.9	Winner
0	99	YLADGDLHSDGPGR			0.0003	1471.67	2	19	1.1.1.1066.20	Winner
0	99	YLADGDLHSDGPGR			0.0003	1471.67	2	14	1.1.1.1069.17	Winner
0	99	YLADGDLHSDGPGR			0.0003	1471.67	2	17	1.1.1.1070.19	Winner
0	99	YLADGDLHSDGPGR			0.0005	1471.67	3	16	1.1.1.1071.10	Winner
0	99	YLADGDLHSDGPGR			0.0005	1471.67	3	12	1.1.1.1076.10	Winner
0	99	YLADGDLHSDGPGR			0.0002	1471.67	3	12	1.1.1.1088.8	Winner
0	99	YLADGDLHSDGPGR			0.0002	1471.67	3	11	1.1.1.1093.8	Winner
0	97	YLADGDLHSDGPGR			0.0005	1471.67	3	11	1.1.1.1082.6	Winner
0	40.3	YLADGDLHSDGPGR			0.0005	1471.67	3	8	1.1.1.1078.9	Winner
0	27.1	YLADGDLHSDGPGR			0.0005	1471.67	3	8	1.1.1.1051.10	Winner
0	15.6	YLADGDLHSDGPGR			0.0002	1471.67	3	7	1.1.1.1084.10	Winner
0	< 1	YLADGDLHSDGPGR			-0.0001	1471.67	3	6	1.1.1.1099.8	Winner
0	< 1	YLADGDLHSDGPGR			-0.0001	1471.67	3	6	1.1.1.1105.8	Winner
0	< 1	YQALKPR		cleaved Q-Y@N-term	-0.0002	874.502	2	7	1.1.1.895.8	Winner
0	99	YQSSHHKEIIDTANTTEMNSDHHSK		missed K-E@7	0.0068	2909.31	5	11	1.1.1.901.16	Winner

## Sheet: 工作表1
0	98.8	LSEPSLPIEDSQDLYNASPEPK	Deamidated(N)@16; Oxidation(P)@19		0.0435	2445.19	3	15	1.1.1.1652.15	Winner
0	12.5	ENMEELLNLCSGK	Deamidated(N)@2; Oxidation(M)@3; Propionamide(C)@10		-0.0105	1566.68	2	9	1.1.1.1415.18	Winner
0	99	DLVKNEELEIQEK	Deamidated(N)@5	missed K-N@4	0.0156	1586.82	2	15	1.1.1.1293.18	Winner
0	99	DLVKNEELEIQEK	Deamidated(N)@5	missed K-N@4	0.0007	1586.8	3	14	1.1.1.1354.9	Winner
0	99	DLVKNEELEIQEK	Deamidated(N)@5	missed K-N@4	-0.0006	1586.8	2	13	1.1.1.1359.20	Winner
0	14.7	DLVKNEELEIQEK	Deamidated(N)@5; Deamidated(Q)@11	missed K-N@4	0.0351	1587.82	3	9	1.1.1.1301.8	Winner
0	9	ESSHNSSFELIGSTIPSYQPCNR	Deamidated(N)@5; Phospho(S)@13; Deamidated(Q)@19; Cys->Dha(C)@21		-0.0254	2600.08	3	10	1.1.1.1694.20	Winner
0	41.3	ESSHNSSFELIGSTIPSYQPCNR	Deamidated(N)@5; Phospho(S)@7; Cys->Dha(C)@21		0.0245	2599.15	3	10	1.1.1.1675.19	Winner
0	99	AGQTVNVNVIVK	Deamidated(N)@6		0.0032	1241.7	2	14	1.1.1.1305.12	Winner
0	99	AGQTVNVNVIVK	Deamidated(N)@6		0.0032	1241.7	2	13	1.1.1.1310.14	Winner
0	99	TGSLLNQPK	Deamidated(N)@6		0.0191	957.532	2	12	1.1.1.970.9	Winner
0	97.9	TGSLLNQPK	Deamidated(N)@6		0.0001	957.513	2	11	1.1.1.1022.11	Winner
0	97.2	TGSLLNQPK	Deamidated(N)@6		-0.0011	957.512	2	10	1.1.1.1039.9	Winner
0	93.3	TGSLLNQPK	Deamidated(N)@6		0.0027	957.516	2	10	1.1.1.1016.11	Winner
0	90.9	TGSLLNQPK	Deamidated(N)@6		-0.0017	957.511	2	10	1.1.1.1034.8	Winner
0	< 1	TGSLLNQPK	Deamidated(N)@6		0.0191	957.532	2	8	1.1.1.963.6	Winner
0	91.4	EIIDTANTTEMNSDHHSK	Deamidated(N)@7		0.0022	2042.89	4	11	1.1.1.1050.13	Winner
0	< 1	EMDKENNDGSSEIGK	Deamidated(N)@7	missed K-E@4	0.013	1652.7	3	8	1.1.1.813.15	Winner
0	91.1	EIIDTANTTEMNSDHHSK	Deamidated(N)@7; Oxidation(M)@11		-0.0016	2058.88	3	11	1.1.1.938.21	Winner
0	99	LAALSDHNPSAPR	Deamidated(N)@8		0.0016	1348.67	3	15	1.1.1.1037.4	Winner
0	< 1	LAALSDHNPSAPR	Deamidated(N)@8		-0.0152	1348.66	3	6	1.1.1.1124.9	Winner
0	< 1	LAALSDHNPSAPR	Deamidated(N)@8		0.0053	1348.68	2	6	1.1.1.1410.14	Winner
0	99	DLVKNEELEIQEK	Deamidated(Q)@11	missed K-N@4	0.0156	1586.82	2	14	1.1.1.1290.17	Winner
0	13.5	DLVKNEELEIQEK	Deamidated(Q)@11	missed K-N@4	-0.005	1586.8	2	8	1.1.1.1349.21	Winner
0	83.7	LSEPSLPIEDSQDLYNASPEPK	Deamidated(Q)@12; Oxidation(D)@13		0.0435	2445.19	3	13	1.1.1.1658.14	Winner
0	98.1	NPFEAIRPGSAQQVK	Deamidated(Q)@13		-0.0019	1641.85	3	12	1.1.1.1260.13	Winner
0	25	NPFEAIRPGSAQQVK	Deamidated(Q)@13		-0.0022	1641.85	3	9	1.1.1.1267.12	Winner
0	36.8	YQSSHHKEIIDTANTTEMNSDHHSK	Deamidated(Q)@2	missed K-E@7	0.0158	2910.3	5	10	1.1.1.891.18	Winner
0	71.1	ETQIITGSDESCRK	Deamidated(Q)@3; Propionamide(C)@12	missed R-K@13	0.0035	1637.76	3	11	1.1.1.954.11	Winner
0	99	FTSQDASTPASSELNKQEK	Deamidated(Q)@4	missed K-Q@16	0.0121	2067.97	3	13	1.1.1.1076.19	Winner
2	99	TGSLLNQPK	Deamidated(Q)@7		0.0191	957.532	2	14	1.1.1.978.7	Winner
0	< 1	KRGPSFMTSPSPK	Deamidated(R)@2	missed K-R@1; missed R-G@2	0.0167	1419.73	3	8	1.1.1.928.9	Winner
0	99	DMGTDGKEELKADVV	Dehydrated(D)@13	cleaved V-P@C-term; missed K-E@7; missed K-A@11	-0.0034	1587.74	2	14	1.1.1.1471.21	Winner
0	99	ENMEELLNLCSGK	Dimethyl(N)@8; Trioxidation(C)@10		-0.0166	1554.67	2	16	1.1.1.1822.14	Winner
0	3.9	ETQIITGSDESCRK	Dioxidation(C)@12; Propionamide(K)@14	missed R-K@13	-0.0149	1668.75	3	10	1.1.1.987.14	Winner
0	99	ESSHNSSFELIGSTIPSYQPCNR	Dioxidation(C)@21; Deamidated(N)@22; Carbamyl(R)@23		0.0176	2628.16	3	21	1.1.1.1642.18	Winner
0	32.4	ESSHNSSFELIGSTIPSYQPCNR	Dioxidation(C)@21; Deamidated(N)@22; Carbamyl(R)@23		0.0176	2628.16	3	12	1.1.1.1637.17	Winner
0	13.2	KPRPTCHGNAMALLK	Dioxidation(C)@6; Oxidation(M)@11		-0.0014	1683.85	3	8	1.1.1.898.14	Winner
0	84.2	MGYFPTEEK	Dioxidation(M)@1		-0.0002	1132.47	2	11	1.1.1.1170.13	Winner
0	58.8	MGYFPTEEK	Dioxidation(M)@1		-0.0009	1132.47	2	9	1.1.1.1175.13	Winner
0	17.7	MGYFPTEEK	Dioxidation(M)@1		0.0502	1132.52	2	9	1.1.1.1180.16	Winner
0	99	TVADSDESYMEK	Dioxidation(M)@10		-0.0006	1405.55	2	13	1.1.1.896.20	Winner
0	99	TVADSDESYMEK	Dioxidation(M)@10		-0.0006	1405.55	2	15	1.1.1.902.20	Winner
0	99	EIIDTANTTEMNSDHHSK	Dioxidation(M)@11		-0.0006	2073.89	3	15	1.1.1.924.18	Winner
0	99	EIIDTANTTEMNSDHHSK	Dioxidation(M)@11		-0.0013	2073.89	4	15	1.1.1.927.14	Winner
0	95.2	LPLASMDENAMDANMDELLDLCTGK	Dioxidation(M)@11; Oxidation(M)@15; Dioxidation(C)@22; Propionamide(K)@25		-0.0196	2860.19	3	14	1.1.1.1775.15	Winner
0	99	DMGTDGKEELKADVVPVTLAPK	Dioxidation(M)@2	missed K-E@7; missed K-A@11	-0.0019	2344.18	4	14	1.1.1.1419.17	Winner
0	99	DMGTDGKEELKADVVPVTLAPK	Dioxidation(M)@2	missed K-E@7; missed K-A@11	0.0002	2344.18	3	15	1.1.1.1421.16	Winner
0	99	DMGTDGKEELKADVVPVTLAPK	Dioxidation(M)@2	missed K-E@7; missed K-A@11	-0.0019	2344.18	4	18	1.1.1.1426.11	Winner
0	< 1	DMGTDGKEELKADVVPVTLAPK	Dioxidation(M)@2	missed K-E@7; missed K-A@11	0.0002	2344.18	3	8	1.1.1.1427.15	Winner
0	99	DEKEMDKENNDGSSEIGK	Dioxidation(M)@5	missed K-E@3; missed K-E@7	-0.0035	2055.85	3	13	1.1.1.774.11	Winner
0	63.4	RGPSFMTSPSPK	Dioxidation(M)@6	missed R-G@1	0.0058	1322.63	3	10	1.1.1.934.5	Winner
2	99	QLGVDVSIKPR	Gln->pyro-Glu@N-term		-0.0004	1193.68	2	16	1.1.1.1438.11	Winner
2	99	QLHSETQR	Gln->pyro-Glu@N-term		-0.0016	980.466	2	12	1.1.1.806.10	Winner
0	65.3	QYQALKPR	Gln->pyro-Glu@N-term	cleaved N-Q@N-term	-0.0029	985.532	2	9	1.1.1.884.9	Winner
0	99	QLGVDVSIKPR	Gln->pyro-Glu@N-term		-0.0004	1193.68	2	15	1.1.1.1435.7	Winner
0	99	QLGVDVSIKPR	Gln->pyro-Glu@N-term		-0.0004	1193.68	2	16	1.1.1.1441.16	Winner
0	99	QLGVDVSIKPR	Gln->pyro-Glu@N-term		-0.0004	1193.68	2	14	1.1.1.1444.8	Winner
0	99	QLGVDVSIKPR	Gln->pyro-Glu@N-term		-0.0007	1193.68	2	13	1.1.1.1446.12	Winner
0	< 1	QLGVDVSIKPR	Gln->pyro-Glu@N-term		-0.0003	1193.68	2	6	1.1.1.1451.12	Winner
0	98.7	QLHSETQR	Gln->pyro-Glu@N-term		-0.0016	980.466	2	8	1.1.1.811.10	Winner
0	< 1	QLHSETQR	Gln->pyro-Glu@N-term		-0.0118	980.456	2	5	1.1.1.822.8	Winner
0	39.6	QYQALKPR	Gln->pyro-Glu@N-term	cleaved N-Q@N-term	0.0078	985.542	2	9	1.1.1.1114.8	Winner
0	9.7	QLHSETQR	Gln->pyro-Glu@N-term; Oxidation(H)@3		-0.0006	996.462	2	8	1.1.1.855.7	Winner
0	84.8	ESALNLPYHMPENK	Glu->pyro-Glu@N-term		0.001	1623.77	3	10	1.1.1.1402.8	Winner
0	99	ESALNLPYHMPENK	Glu->pyro-Glu@N-term; Oxidation(M)@10		0.0017	1639.77	2	12	1.1.1.1372.20	Winner
2	99	EIIDTANTTEMNSDHHSK	Glu->pyro-Glu@N-term; Oxidation(M)@11		-0.0007	2039.88	3	16	1.1.1.1066.19	Winner
0	50.5	ETQIITGSDESCRK	Glu->pyro-Glu@N-term; Propionamide(C)@12	missed R-K@13	0.0002	1618.76	3	10	1.1.1.925.13	Winner
0	< 1	ETQIITGSDESCRK	Glu->pyro-Glu@N-term; Propionamide(C)@12	missed R-K@13	0.0001	1618.76	2	7	1.1.1.1150.19	Winner
0.01	99	GTSFFPTAGGFRSPSPGLFR	Methyl(R)@12	missed R-S@12	-0.0043	2099.05	3	16	1.1.1.1757.8	Winner
0	96.6	QTGRGTSFFPTAGGFR	Methyl(T)@6	missed R-G@4	0.0005	1699.84	3	13	1.1.1.1430.8	Winner
2	99	MGYFPTEEK	Oxidation(M)@1		-0.0001	1116.48	2	14	1.1.1.1146.8	Winner
0	99	MGYFPTEEK	Oxidation(M)@1		-0.0001	1116.48	2	13	1.1.1.1140.12	Winner
0	99	MGYFPTEEK	Oxidation(M)@1		-0.0016	1116.48	2	13	1.1.1.1152.7	Winner
0	99	MGYFPTEEK	Oxidation(M)@1		0.0001	1116.48	2	11	1.1.1.1158.14	Winner
0	97.4	MGYFPTEEK	Oxidation(M)@1		0.0003	1116.48	2	10	1.1.1.1164.11	Winner
0	94.8	MGYFPTEEK	Oxidation(M)@1		0.0075	1116.49	2	9	1.1.1.1240.12	Winner
0	94.5	MGYFPTEEK	Oxidation(M)@1		-0.0001	1116.48	2	10	1.1.1.1143.10	Winner
0	< 1	MGYFPTEEK	Oxidation(M)@1		-0.0051	1116.47	2	6	1.1.1.1196.11	Winner
0	99	MGYFPTEEKSETDENSGK	Oxidation(M)@1	missed K-S@9	0.0011	2063.86	3	18	1.1.1.1075.19	Winner
0	99	MGYFPTEEKSETDENSGK	Oxidation(M)@1	missed K-S@9	0.0011	2063.86	3	21	1.1.1.1081.18	Winner
0	99	MGYFPTEEKSETDENSGK	Oxidation(M)@1	missed K-S@9	0.0011	2063.86	3	16	1.1.1.1087.17	Winner
0	95.1	MGYFPTEEKSETDENSGKQPSK	Oxidation(M)@1	missed K-S@9; missed K-Q@18	-0.0011	2504.1	4	11	1.1.1.1019.17	Winner
0	69.7	MGYFPTEEKSETDENSGKQPSK	Oxidation(M)@1	missed K-S@9; missed K-Q@18	-0.0011	2504.1	4	10	1.1.1.1025.17	Winner
0	99	MGYFPTEEKSETDENSGKQPSKLDEDDSCSLLTK	Oxidation(M)@1; Propionamide(C)@29	missed K-S@9; missed K-Q@18; missed K-L@22	-0.0044	3894.73	5	20	1.1.1.1339.17	Winner
0	99	MGYFPTEEKSETDENSGKQPSKLDEDDSCSLLTK	Oxidation(M)@1; Propionamide(C)@29	missed K-S@9; missed K-Q@18; missed K-L@22	-0.0044	3894.73	5	16	1.1.1.1344.18	Winner
0	98.5	MGYFPTEEKSETDENSGKQPSKLDEDDSCSLLTK	Oxidation(M)@1; Propionamide(C)@29	missed K-S@9; missed K-Q@18; missed K-L@22	0.0012	3894.73	4	13	1.1.1.1342.20	Winner
2	99	MGYFPTEEKSETDENSGKQPSKLDEDDSCSLLTK	Oxidation(M)@1; Trioxidation(C)@29	missed K-S@9; missed K-Q@18; missed K-L@22	0.0013	3871.68	4	19	1.1.1.1355.19	Winner
0	82.1	MGYFPTEEKSETDENSGKQPSKLDEDDSCSLLTK	Oxidation(M)@1; Trioxidation(C)@29; Formyl(K)@34	missed K-S@9; missed K-Q@18; missed K-L@22	0.0189	3899.69	5	13	1.1.1.1406.18	Winner
2	99	ESALNLPYHMPENK	Oxidation(M)@10		-0.0014	1657.78	3	18	1.1.1.1232.8	Winner
0	99	ESALNLPYHMPENK	Oxidation(M)@10		-0.0014	1657.78	3	13	1.1.1.1221.12	Winner
0	99	ESALNLPYHMPENK	Oxidation(M)@10		-0.0014	1657.78	3	17	1.1.1.1226.15	Winner
0	99	ESALNLPYHMPENK	Oxidation(M)@10		-0.0011	1657.78	2	13	1.1.1.1236.18	Winner
0	99	ESALNLPYHMPENK	Oxidation(M)@10		-0.0014	1657.78	3	14	1.1.1.1238.9	Winner
0	98.8	ESALNLPYHMPENK	Oxidation(M)@10		-0.0018	1657.78	3	12	1.1.1.1244.11	Winner
0	19.5	ESALNLPYHMPENK	Oxidation(M)@10		-0.0056	1657.77	3	8	1.1.1.1257.11	Winner
0	99	TVADSDESYMEK	Oxidation(M)@10		-0.0025	1389.56	2	11	1.1.1.859.20	Winner
0	99	TVADSDESYMEK	Oxidation(M)@10		-0.0001	1389.56	2	13	1.1.1.873.19	Winner
0	99	TVADSDESYMEK	Oxidation(M)@10		-0.0001	1389.56	2	21	1.1.1.878.21	Winner
0	99	TVADSDESYMEK	Oxidation(M)@10		-0.0001	1389.56	2	21	1.1.1.884.20	Winner
0	99	TVADSDESYMEK	Oxidation(M)@10		-0.0001	1389.56	2	18	1.1.1.890.21	Winner
0	99	TVADSDESYMEK	Oxidation(M)@10		-0.0003	1389.56	2	14	1.1.1.895.19	Winner
0	99	TVADSDESYMEK	Oxidation(M)@10		-0.0007	1389.56	2	10	1.1.1.912.20	Winner
0	98.2	TVADSDESYMEK	Oxidation(M)@10		-0.0007	1389.56	2	9	1.1.1.918.19	Winner
0	< 1	ESALNLPYHMPENK	Oxidation(M)@10; Deamidated(N)@13		-0.0019	1658.76	3	8	1.1.1.1256.7	Winner
0	99	EIIDTANTTEMNSDHHSK	Oxidation(M)@11		-0.0019	2057.89	3	18	1.1.1.904.20	Winner
0	99	EIIDTANTTEMNSDHHSK	Oxidation(M)@11		-0.0017	2057.89	2	22	1.1.1.905.20	Winner
0	99	EIIDTANTTEMNSDHHSK	Oxidation(M)@11		-0.0023	2057.89	4	20	1.1.1.906.7	Winner
0	99	EIIDTANTTEMNSDHHSK	Oxidation(M)@11		-0.0017	2057.89	2	18	1.1.1.907.21	Winner
0	99	EIIDTANTTEMNSDHHSK	Oxidation(M)@11		-0.0017	2057.89	2	9	1.1.1.909.21	Winner
0	99	EIIDTANTTEMNSDHHSK	Oxidation(M)@11		-0.0019	2057.89	3	18	1.1.1.910.21	Winner
0	99	EIIDTANTTEMNSDHHSK	Oxidation(M)@11		-0.0023	2057.89	4	14	1.1.1.916.12	Winner
0	99	EIIDTANTTEMNSDHHSK	Oxidation(M)@11; Deamidated(N)@12		0.0182	2058.9	3	17	1.1.1.903.20	Winner
0	99	EIIDTANTTEMNSDHHSK	Oxidation(M)@11; Deamidated(N)@12		-0.0003	2058.88	4	14	1.1.1.925.11	Winner
0	99	EIIDTANTTEMNSDHHSK	Oxidation(M)@11; Deamidated(N)@12		-0.0003	2058.88	4	17	1.1.1.926.12	Winner
0	99	EIIDTANTTEMNSDHHSK	Oxidation(M)@11; Deamidated(N)@12		-0.0025	2058.88	3	15	1.1.1.927.19	Winner
0	99	EIIDTANTTEMNSDHHSK	Oxidation(M)@11; Deamidated(N)@12		-0.0016	2058.88	3	17	1.1.1.929.17	Winner
0	99	EIIDTANTTEMNSDHHSK	Oxidation(M)@11; Deamidated(N)@12		-0.0001	2058.88	4	14	1.1.1.932.10	Winner
0	92.5	EIIDTANTTEMNSDHHSK	Oxidation(M)@11; Deamidated(N)@12		-0.0025	2058.88	3	11	1.1.1.917.19	Winner
0	< 1	EIIDTANTTEMNSDHHSK	Oxidation(M)@11; Deamidated(N)@12		-0.0002	2058.88	2	5	1.1.1.921.21	Winner
0	91.3	LPLASMDENAMDANMDELLDLCTGK	Oxidation(M)@11; Oxidation(M)@15; Cys->Dha(C)@22		0.0089	2707.21	3	11	1.1.1.1803.19	Winner
2	99	HKEIIDTANTTEMNSDHHSK	Oxidation(M)@13	cleaved H-H@N-term; missed K-E@2	-0.0049	2323.05	4	13	1.1.1.799.17	Winner
0	99	YQSSHHKEIIDTANTTEMNSDHHSK	Oxidation(M)@18	missed K-E@7	-0.0033	2925.29	5	19	1.1.1.832.16	Winner
0	99	YQSSHHKEIIDTANTTEMNSDHHSK	Oxidation(M)@18	missed K-E@7	-0.0033	2925.29	5	16	1.1.1.833.13	Winner
0	99	YQSSHHKEIIDTANTTEMNSDHHSK	Oxidation(M)@18	missed K-E@7	-0.0017	2925.29	4	26	1.1.1.833.19	Winner
0	99	YQSSHHKEIIDTANTTEMNSDHHSK	Oxidation(M)@18	missed K-E@7	-0.0017	2925.29	4	24	1.1.1.834.18	Winner
0	99	YQSSHHKEIIDTANTTEMNSDHHSK	Oxidation(M)@18	missed K-E@7	-0.0047	2925.29	6	17	1.1.1.835.9	Winner
0	99	YQSSHHKEIIDTANTTEMNSDHHSK	Oxidation(M)@18	missed K-E@7	-0.0017	2925.29	4	29	1.1.1.835.18	Winner
0	99	YQSSHHKEIIDTANTTEMNSDHHSK	Oxidation(M)@18	missed K-E@7	-0.0017	2925.29	4	24	1.1.1.836.19	Winner
0	99	YQSSHHKEIIDTANTTEMNSDHHSK	Oxidation(M)@18	missed K-E@7	-0.0033	2925.29	5	20	1.1.1.837.19	Winner
0	99	YQSSHHKEIIDTANTTEMNSDHHSK	Oxidation(M)@18	missed K-E@7	-0.0017	2925.29	4	15	1.1.1.838.16	Winner
0	99	YQSSHHKEIIDTANTTEMNSDHHSK	Oxidation(M)@18; Deamidated(N)@19	missed K-E@7	-0.0004	2926.28	5	14	1.1.1.827.15	Winner
0	41.3	YQSSHHKEIIDTANTTEMNSDHHSK	Oxidation(M)@18; Deamidated(N)@19	missed K-E@7	0.0005	2926.28	5	10	1.1.1.854.16	Winner
0	11.4	YQSSHHKEIIDTANTTEMNSDHHSK	Oxidation(M)@18; Deamidated(N)@19	missed K-E@7	0	2926.28	6	9	1.1.1.830.8	Winner
0	< 1	YQSSHHKEIIDTANTTEMNSDHHSK	Oxidation(M)@18; Deamidated(N)@19	missed K-E@7	0.0018	2926.28	6	7	1.1.1.856.4	Winner
0	< 1	YQSSHHKEIIDTANTTEMNSDHHSK	Oxidation(M)@18; Deamidated(N)@19	missed K-E@7	0.0023	2926.28	4	6	1.1.1.856.17	Winner
2	99	EMDKENNDGSSEIGK	Oxidation(M)@2	missed K-E@4	-0.0016	1667.69	2	16	1.1.1.755.9	Winner
0	99	DMGTDGKEELKADVVPVTLAPK	Oxidation(M)@2	missed K-E@7; missed K-A@11	-0.0001	2328.19	3	15	1.1.1.1404.16	Winner
0	99	DMGTDGKEELKADVVPVTLAPK	Oxidation(M)@2	missed K-E@7; missed K-A@11	0.0033	2328.19	4	24	1.1.1.1410.8	Winner
0	99	DMGTDGKEELKADVVPVTLAPK	Oxidation(M)@2	missed K-E@7; missed K-A@11	0.0033	2328.19	4	21	1.1.1.1417.14	Winner
0	99	DMGTDGKEELKADVVPVTLAPK	Oxidation(M)@2	missed K-E@7; missed K-A@11	-0.0001	2328.19	3	23	1.1.1.1418.19	Winner
0	99	DMGTDGKEELKADVVPVTLAPK	Oxidation(M)@2	missed K-E@7; missed K-A@11	0.0033	2328.19	4	13	1.1.1.1422.14	Winner
0	99	DMGTDGKEELKADVVPVTLAPK	Oxidation(M)@2	missed K-E@7; missed K-A@11	-0.0001	2328.19	3	13	1.1.1.1422.19	Winner
0	99	DMGTDGKEELKADVVPVTLAPK	Oxidation(M)@2	missed K-E@7; missed K-A@11	-0.0033	2328.19	4	19	1.1.1.1428.12	Winner
0	99	DMGTDGKEELKADVVPVTLAPK	Oxidation(M)@2	missed K-E@7; missed K-A@11	-0.0005	2328.19	3	19	1.1.1.1429.16	Winner
0	99	DMGTDGKEELKADVVPVTLAPK	Oxidation(M)@2	missed K-E@7; missed K-A@11	-0.0005	2328.19	3	19	1.1.1.1430.16	Winner
0	99	DMGTDGKEELKADVVPVTLAPK	Oxidation(M)@2	missed K-E@7; missed K-A@11	-0.0005	2328.19	3	15	1.1.1.1433.13	Winner
0	98.1	DMGTDGKEELKADVVPVTLAPK	Oxidation(M)@2	missed K-E@7; missed K-A@11	-0.0028	2328.19	4	12	1.1.1.1440.10	Winner
0	< 1	DMGTDGKEELKADVVPVTLAPK	Oxidation(M)@2	missed K-E@7; missed K-A@11	0.0048	2328.19	2	3	1.1.1.1411.21	Winner
0	< 1	DMGTDGKEELKADVVPVTLAPK	Oxidation(M)@2	missed K-E@7; missed K-A@11	0.0011	2328.19	4	7	1.1.1.1446.11	Winner
0	< 1	DMGTDGKEELKADVVPVTLAPK	Oxidation(M)@2	missed K-E@7; missed K-A@11	0.0021	2328.19	4	5	1.1.1.1468.10	Winner
0	99	EMDKENNDGSSEIGK	Oxidation(M)@2	missed K-E@4	-0.0045	1667.69	3	14	1.1.1.758.8	Winner
0	97.5	EMDKENNDGSSEIGK	Oxidation(M)@2	missed K-E@4	-0.0045	1667.69	3	11	1.1.1.753.9	Winner
0	97.1	PMVIQESK	Oxidation(M)@2	cleaved R-P@N-term	-0.0006	946.479	2	8	1.1.1.830.7	Winner
0	89.2	PMVIQESK	Oxidation(M)@2	cleaved R-P@N-term	-0.0006	946.479	2	7	1.1.1.825.6	Winner
0	99	EMDKENNDGSSEIGK	Oxidation(M)@2; Deamidated(N)@6	missed K-E@4	-0.0045	1668.67	3	15	1.1.1.774.9	Winner
0	< 1	EMDKENNDGSSEIGK	Oxidation(M)@2; Deamidated(N)@7	missed K-E@4	-0.0047	1668.67	3	7	1.1.1.768.9	Winner
2	99	DMGTDGKEELKADVV	Oxidation(M)@2; Dehydrated(D)@13	cleaved V-P@C-term; missed K-E@7; missed K-A@11	0.0048	1603.74	2	19	1.1.1.1408.21	Winner
0	99	DMGTDGKEELKADVV	Oxidation(M)@2; Dehydrated(D)@13	cleaved V-P@C-term; missed K-E@7; missed K-A@11	0.0048	1603.74	2	15	1.1.1.1414.20	Winner
0.02	70.8	SFMTSPSPK	Oxidation(M)@3	cleaved P-S@N-term	0.0285	996.487	2	10	1.1.1.871.11	Winner
0	99	ENMEELLNLCSGK	Oxidation(M)@3; Cys->Dha(C)@10		-0.0028	1460.68	2	14	1.1.1.1440.17	Winner
0	98.1	ENMEELLNLCSGK	Oxidation(M)@3; Cys->Dha(C)@10		-0.001	1460.68	2	12	1.1.1.1420.13	Winner
0	96.2	ENMEELLNLCSGK	Oxidation(M)@3; Cys->Dha(C)@10		-0.001	1460.68	2	11	1.1.1.1414.17	Winner
0	90.9	ENMEELLNLCSGK	Oxidation(M)@3; Cys->Dha(C)@10		-0.002	1460.68	2	10	1.1.1.1390.16	Winner
0	81.5	ENMEELLNLCSGK	Oxidation(M)@3; Cys->Dha(C)@10		-0.001	1460.68	2	9	1.1.1.1426.17	Winner
2	99	ENMEELLNLCSGK	Oxidation(M)@3; Trioxidation(C)@10		-0.0035	1542.65	2	17	1.1.1.1438.21	Winner
0	99	ENMEELLNLCSGK	Oxidation(M)@3; Trioxidation(C)@10		-0.0007	1542.65	2	15	1.1.1.1441.20	Winner
0	99	ENMEELLNLCSGK	Oxidation(M)@3; Trioxidation(C)@10		-0.0007	1542.65	2	20	1.1.1.1444.19	Winner
0	99	ENMEELLNLCSGK	Oxidation(M)@3; Trioxidation(C)@10		-0.0007	1542.65	2	18	1.1.1.1448.17	Winner
0	99	ENMEELLNLCSGK	Oxidation(M)@3; Trioxidation(C)@10		-0.0007	1542.65	2	19	1.1.1.1449.16	Winner
0	99	ENMEELLNLCSGK	Oxidation(M)@3; Trioxidation(C)@10; Formyl(K)@13		0.0207	1570.67	2	15	1.1.1.1570.18	Winner
0	98.2	ENMEELLNLCSGK	Oxidation(M)@3; Trioxidation(C)@10; Formyl(K)@13		0.0207	1570.67	2	14	1.1.1.1565.20	Winner
0	54.1	ENMEELLNLCSGK	Oxidation(M)@3; Trioxidation(C)@10; Formyl(K)@13		0.0189	1570.67	2	11	1.1.1.1576.17	Winner
0.12	91.1	SRPMVIQESK	Oxidation(M)@4	cleaved A-S@N-term	-0.0023	1189.61	2	11	1.1.1.842.13	Winner
0	33.5	SRPMVIQESK	Oxidation(M)@4	cleaved A-S@N-term	-0.0023	1189.61	2	7	1.1.1.836.17	Winner
0	< 1	SRPMVIQESK	Oxidation(M)@4	cleaved A-S@N-term	-0.0029	1189.61	2	6	1.1.1.802.14	Winner
0	98.9	KENMEELLNLCSGKFTSQDASTPASSELNK	Oxidation(M)@4; Acetyl(C)@11; Phospho(S)@12	missed K-E@1; missed K-F@14	0.0523	3408.56	4	14	1.1.1.1092.21	Winner
2	99	KENMEELLNLCSGK	Oxidation(M)@4; Trioxidation(C)@11	missed K-E@1	0.0003	1670.75	2	17	1.1.1.1305.20	Winner
0	36	KENMEELLNLCSGK	Oxidation(M)@4; Trioxidation(C)@11	missed K-E@1	0.0003	1670.75	2	9	1.1.1.1311.20	Winner
2	99	ASRPMVIQESK	Oxidation(M)@5	cleaved N-A@N-term	-0.001	1260.65	3	14	1.1.1.829.4	Winner
0	78.2	ASRPMVIQESK	Oxidation(M)@5	cleaved N-A@N-term	-0.001	1260.65	3	11	1.1.1.824.5	Winner
0	99	DEKEMDKENNDGSSEIGK	Oxidation(M)@5	missed K-E@3; missed K-E@7	-0.0029	2039.86	3	17	1.1.1.761.6	Winner
0	99	DEKEMDKENNDGSSEIGK	Oxidation(M)@5	missed K-E@3; missed K-E@7	-0.0038	2039.86	4	21	1.1.1.767.5	Winner
0	< 1	DEKEMDKENNDGSSEIGK	Oxidation(M)@5	missed K-E@3; missed K-E@7	-0.0038	2039.86	4	5	1.1.1.770.12	Winner
0	99	GPSFMTSPSPK	Oxidation(M)@5		-0.0002	1150.53	2	19	1.1.1.983.14	Winner
0	99	GPSFMTSPSPK	Oxidation(M)@5		-0.0002	1150.53	2	19	1.1.1.988.16	Winner
0	99	GPSFMTSPSPK	Oxidation(M)@5		-0.0002	1150.53	2	18	1.1.1.993.16	Winner
0	34.6	GPSFMTSPSPK	Oxidation(M)@5		-0.0009	1150.53	2	7	1.1.1.940.14	Winner
0	< 1	GPSFMTSPSPK	Oxidation(M)@5		0.0351	1150.57	2	7	1.1.1.1021.17	Winner
0	< 1	GPSFMTSPSPK	Oxidation(M)@5		0.0182	1150.55	2	5	1.1.1.1030.15	Winner
0	99	DEKEMDKENNDGSSEIGK	Oxidation(M)@5; Deamidated(N)@10	missed K-E@3; missed K-E@7	-0.0043	2040.84	4	15	1.1.1.776.7	Winner
0	99	DEKEMDKENNDGSSEIGK	Oxidation(M)@5; Deamidated(N)@10	missed K-E@3; missed K-E@7	-0.0043	2040.84	4	16	1.1.1.782.11	Winner
0	99	DEKEMDKENNDGSSEIGK	Oxidation(M)@5; Deamidated(N)@10	missed K-E@3; missed K-E@7	0.0008	2040.84	3	14	1.1.1.785.12	Winner
0	41.5	DEKEMDKENNDGSSEIGK	Oxidation(M)@5; Deamidated(N)@10	missed K-E@3; missed K-E@7	0.0008	2040.84	3	8	1.1.1.786.9	Winner
0	28.3	DEKEMDKENNDGSSEIGK	Oxidation(M)@5; Deamidated(N)@10	missed K-E@3; missed K-E@7	-0.0035	2040.84	4	6	1.1.1.787.14	Winner
0	99	DEKEMDKENNDGSSEIGK	Oxidation(M)@5; Deamidated(N)@9	missed K-E@3; missed K-E@7	0.0008	2040.84	3	18	1.1.1.776.13	Winner
0	99	NASRPMVIQESK	Oxidation(M)@6		-0.0011	1374.69	3	13	1.1.1.836.4	Winner
0	99	NASRPMVIQESK	Oxidation(M)@6		-0.0011	1374.69	3	15	1.1.1.842.2	Winner
0	97.6	NASRPMVIQESK	Oxidation(M)@6		-0.0011	1374.69	3	11	1.1.1.848.6	Winner
0	89.1	NASRPMVIQESK	Oxidation(M)@6		-0.0046	1374.69	3	10	1.1.1.854.5	Winner
0	48.9	NASRPMVIQESK	Oxidation(M)@6		-0.0004	1374.69	3	9	1.1.1.860.8	Winner
0	< 1	NASRPMVIQESK	Oxidation(M)@6		-0.0044	1374.69	3	5	1.1.1.826.9	Winner
0	< 1	NASRPMVIQESK	Oxidation(M)@6		-0.0044	1374.69	3	5	1.1.1.831.8	Winner
0	< 1	NASRPMVIQESK	Oxidation(M)@6		-0.004	1374.69	3	6	1.1.1.865.6	Winner
0	< 1	NASRPMVIQESK	Oxidation(M)@6		-0.0152	1374.68	3	5	1.1.1.933.9	Winner
0	99	RGPSFMTSPSPK	Oxidation(M)@6	missed R-G@1	-0.001	1306.63	3	15	1.1.1.916.3	Winner
0	99	RGPSFMTSPSPK	Oxidation(M)@6	missed R-G@1	-0.001	1306.63	3	12	1.1.1.922.5	Winner
0	98	RGPSFMTSPSPK	Oxidation(M)@6	missed R-G@1	-0.001	1306.63	3	11	1.1.1.910.3	Winner
0	65.2	RGPSFMTSPSPK	Oxidation(M)@6	missed R-G@1	-0.0014	1306.63	3	8	1.1.1.858.5	Winner
0	< 1	RGPSFMTSPSPK	Oxidation(M)@6	missed R-G@1	0.0302	1306.66	3	7	1.1.1.927.6	Winner
0	97.3	LPLASMDENAMDANMDELLDLCTGK	Oxidation(M)@6; Oxidation(M)@11; Carboxy(D)@20; Trioxidation(C)@22		0.0252	2833.19	3	15	1.1.1.1821.15	Winner
0	98.3	LPLASMDENAMDANMDELLDLCTGK	Oxidation(M)@6; Oxidation(M)@11; Carboxy(E)@17; Trioxidation(C)@22		0.0252	2833.19	3	16	1.1.1.1816.8	Winner
0	41.3	LPLASMDENAMDANMDELLDLCTGK	Oxidation(M)@6; Oxidation(M)@11; Dethiomethyl(M)@15; Dioxidation(C)@22		-0.0175	2725.16	3	8	1.1.1.1785.18	Winner
2	99	LPLASMDENAMDANMDELLDLCTGK	Oxidation(M)@6; Oxidation(M)@11; Oxidation(M)@15; Cys->Dha(C)@22		-0.0028	2723.19	3	21	1.1.1.1703.19	Winner
0	99	LPLASMDENAMDANMDELLDLCTGK	Oxidation(M)@6; Oxidation(M)@11; Oxidation(M)@15; Cys->Dha(C)@22		-0.0028	2723.19	3	19	1.1.1.1698.18	Winner
2	99	LPLASMDENAMDANMDELLDLCTGKFTSQAEK	Oxidation(M)@6; Oxidation(M)@11; Oxidation(M)@15; Trioxidation(C)@22	missed K-F@25	-0.002	3596.55	3	27	1.1.1.1769.14	Winner
0	99	LPLASMDENAMDANMDELLDLCTGK	Oxidation(M)@6; Oxidation(M)@11; Oxidation(M)@15; Trioxidation(C)@22		-0.0012	2805.17	3	22	1.1.1.1704.19	Winner
0	99	LPLASMDENAMDANMDELLDLCTGK	Oxidation(M)@6; Oxidation(M)@11; Oxidation(M)@15; Trioxidation(C)@22		-0.0012	2805.17	3	23	1.1.1.1709.21	Winner
0	99	LPLASMDENAMDANMDELLDLCTGK	Oxidation(M)@6; Oxidation(M)@11; Oxidation(M)@15; Trioxidation(C)@22		-0.0012	2805.17	3	14	1.1.1.1714.19	Winner
0	62	RGPSFMTSPSPK	Oxidation(M)@6; Phospho(S)@10	missed R-G@1	-0.0002	1386.6	2	9	1.1.1.1018.19	Winner
2	99	KRGPSFMTSPSPK	Oxidation(M)@7	missed K-R@1; missed R-G@2	-0.0017	1434.73	3	16	1.1.1.826.11	Winner
0	98.2	KRGPSFMTSPSPK	Oxidation(M)@7	missed K-R@1; missed R-G@2	0.0002	1434.73	2	9	1.1.1.821.18	Winner
0	< 1	KRGPSFMTSPSPK	Oxidation(M)@7	missed K-R@1; missed R-G@2	-0.0017	1434.73	3	4	1.1.1.818.8	Winner
0	< 1	KRGPSFMTSPSPK	Oxidation(M)@7	missed K-R@1; missed R-G@2	-0.0017	1434.73	3	4	1.1.1.829.8	Winner
0	< 1	KRGPSFMTSPSPK	Oxidation(M)@7	missed K-R@1; missed R-G@2	-0.0017	1434.73	3	5	1.1.1.831.11	Winner
0	< 1	KRGPSFMTSPSPK	Oxidation(M)@7; Phospho(S)@11	missed K-R@1; missed R-G@2	-0.0035	1514.69	3	7	1.1.1.895.9	Winner
2	99	NIDDASQMDLFHR	Oxidation(M)@8		-0.0024	1576.69	2	20	1.1.1.1251.7	Winner
2	99	NIDDASQMDLFHRDSDDDQTEEQLDESEAR	Oxidation(M)@8	missed R-D@13	0.0027	3539.45	4	24	1.1.1.1368.20	Winner
0	99	NIDDASQMDLFHR	Oxidation(M)@8		-0.001	1576.69	3	15	1.1.1.1246.10	Winner
0	99	NIDDASQMDLFHR	Oxidation(M)@8		-0.001	1576.69	3	14	1.1.1.1252.4	Winner
0	93.1	NIDDASQMDLFHR	Oxidation(M)@8		-0.002	1576.69	2	10	1.1.1.1255.16	Winner
0	92	NIDDASQMDLFHR	Oxidation(M)@8		-0.0024	1576.69	2	10	1.1.1.1254.21	Winner
0	85.4	NIDDASQMDLFHR	Oxidation(M)@8		-0.001	1576.69	3	10	1.1.1.1240.9	Winner
0	99	NIDDASQMDLFHRDSDDDQTEEQLDESEAR	Oxidation(M)@8	missed R-D@13	0.0027	3539.45	4	19	1.1.1.1373.20	Winner
0	14.3	KSDKKENMEELLNLCSGK	Oxidation(M)@8; Cys->Dha(C)@15	missed K-S@1; missed K-K@4; missed K-E@5	0.0012	2047.03	3	9	1.1.1.1115.17	Winner
1.59	99	KSDKKENMEELLNLCSGK	Oxidation(M)@8; Trioxidation(C)@15	missed K-S@1; missed K-K@4; missed K-E@5	-0.0032	2128.99	3	14	1.1.1.1136.19	Winner
0	99	KSDKKENMEELLNLCSGK	Oxidation(M)@8; Trioxidation(C)@15	missed K-S@1; missed K-K@4; missed K-E@5	-0.0007	2129	4	14	1.1.1.1133.14	Winner
0	99	KSDKKENMEELLNLCSGK	Oxidation(M)@8; Trioxidation(C)@15	missed K-S@1; missed K-K@4; missed K-E@5	-0.0032	2128.99	3	12	1.1.1.1137.19	Winner
0	97.3	KSDKKENMEELLNLCSGK	Oxidation(M)@8; Trioxidation(C)@15; Formyl(K)@18	missed K-S@1; missed K-K@4; missed K-E@5	0.0124	2157.01	4	14	1.1.1.1261.11	Winner
0	42.6	KPRPTCHGNAMALLK	Oxidation(P)@2; Dioxidation(C)@6; Oxidation(M)@11		0.0001	1699.85	4	10	1.1.1.905.5	Winner
0	< 1	NASRPMVIQESK	Oxidation(P)@5; Oxidation(M)@6		-0.0032	1390.68	3	8	1.1.1.859.6	Winner
0	97.1	LSEPSLPIEDSQDLYNASPEPK	Oxidation(P)@7; Cation:K(E)@9		-0.0339	2482.08	3	15	1.1.1.1645.18	Winner
0	41.3	LSEPSLPIEDSQDLYNASPEPK	Oxidation(P)@7; Cation:K(E)@9; Deamidated(Q)@12		-0.0157	2483.08	4	12	1.1.1.1660.7	Winner
0	< 1	ENMEELLNLCSGK	Phospho(S)@11		-0.0041	1558.64	2	4	1.1.1.1765.15	Winner
0	99	FTSQDASTPASSELNKQEK	Phospho(S)@11	missed K-Q@16	0.0031	2146.94	3	18	1.1.1.1089.20	Winner
0	52.7	FTSQDASTPASSELNKQEK	Phospho(S)@11	missed K-Q@16	0.0031	2146.94	3	9	1.1.1.1096.21	Winner
0	< 1	NSRNFVFHTLSPVK	Phospho(S)@11	missed R-N@3	0.0227	1724.86	3	5	1.1.1.1416.9	Winner
0	< 1	VEEPEQQNKSSAVGPPEK	Phospho(S)@11	missed K-S@9	0	2031.92	3	7	1.1.1.792.19	Winner
0	99	FTSQDASTPASSELNKQEK	Phospho(S)@12	missed K-Q@16	0.0031	2146.94	3	14	1.1.1.1083.19	Winner
0	99	KKEPSLESGVHSFEEGSELSK	Phospho(S)@12	missed K-K@1; missed K-E@2	-0.0032	2383.09	4	16	1.1.1.1284.14	Winner
0	99	KKEPSLESGVHSFEEGSELSK	Phospho(S)@12	missed K-K@1; missed K-E@2	-0.0032	2383.09	4	18	1.1.1.1289.15	Winner
0	99	KKEPSLESGVHSFEEGSELSK	Phospho(S)@12	missed K-K@1; missed K-E@2	-0.0032	2383.09	4	16	1.1.1.1294.11	Winner
0	99	KKEPSLESGVHSFEEGSELSK	Phospho(S)@12	missed K-K@1; missed K-E@2	-0.0032	2383.09	4	14	1.1.1.1300.14	Winner
0	97.7	KKEPSLESGVHSFEEGSELSK	Phospho(S)@12	missed K-K@1; missed K-E@2	-0.0039	2383.09	4	12	1.1.1.1279.15	Winner
0	96.5	ESSHNSSFELIGSTIPSYQPCNR	Phospho(S)@13		-0.0073	2632.12	3	11	1.1.1.1690.21	Winner
0	89	ESSHNSSFELIGSTIPSYQPCNR	Phospho(S)@17		-0.0073	2632.12	3	10	1.1.1.1685.21	Winner
0	99	LSEPSLPIEDSQDLYNASPEPK	Phospho(S)@18		0.0013	2508.13	3	15	1.1.1.1799.13	Winner
0	99	LSEPSLPIEDSQDLYNASPEPK	Phospho(S)@18		0.0068	2508.14	3	15	1.1.1.1805.12	Winner
0	99	LSEPSLPIEDSQDLYNASPEPK	Phospho(S)@18		0.0068	2508.14	3	17	1.1.1.1810.12	Winner
0	99	LSEPSLPIEDSQDLYNASPEPK	Phospho(S)@18		0.0061	2508.14	3	18	1.1.1.1824.13	Winner
0	99	LSEPSLPIEDSQDLYNASPEPK	Phospho(S)@18		0.0019	2508.13	3	17	1.1.1.1829.11	Winner
0	99	LSEPSLPIEDSQDLYNASPEPK	Phospho(S)@18		-0.0002	2508.13	3	14	1.1.1.1838.14	Winner
0	97.4	LSEPSLPIEDSQDLYNASPEPK	Phospho(S)@18		0.0101	2508.14	3	10	1.1.1.1786.15	Winner
0	90.7	LSEPSLPIEDSQDLYNASPEPK	Phospho(S)@18		-0.0005	2508.13	3	10	1.1.1.1779.20	Winner
0	81.9	LSEPSLPIEDSQDLYNASPEPK	Phospho(S)@18		0.0008	2508.13	3	9	1.1.1.1819.18	Winner
0	78.8	LSEPSLPIEDSQDLYNASPEPK	Phospho(S)@18; Oxidation(P)@21; Hypusine(K)@22		0.0022	2611.2	3	13	1.1.1.1715.18	Winner
0	65.5	GSTIPSYQPCNRQTGRGTSFFPTAGGFR	Phospho(S)@2; Ammonia-loss(N)@11; Phospho(T)@14	cleaved I-G@N-term; missed R-Q@12; missed R-G@16	0.0169	3132.35	5	13	1.1.1.1576.10	Winner
0	99	SLSSDSTLLLFK	Phospho(S)@3		0.0013	1389.68	2	15	1.1.1.1944.9	Winner
0	99	SLSSDSTLLLFK	Phospho(S)@3		0.0013	1389.68	2	16	1.1.1.1949.7	Winner
0	99	SLSSDSTLLLFK	Phospho(S)@3		0.001	1389.68	2	20	1.1.1.1954.4	Winner
0	99	SLSSDSTLLLFK	Phospho(S)@3		0.0013	1389.68	2	15	1.1.1.1959.11	Winner
0	99	SLSSDSTLLLFK	Phospho(S)@3		-0.0013	1389.68	2	16	1.1.1.1964.16	Winner
0	99	SLSSDSTLLLFK	Phospho(S)@3		-0.0012	1389.68	2	18	1.1.1.1969.17	Winner
0	99	SLSSDSTLLLFK	Phospho(S)@3		0.0007	1389.68	2	18	1.1.1.1974.9	Winner
0	99	SLSSDSTLLLFK	Phospho(S)@3		0.0007	1389.68	2	20	1.1.1.1979.13	Winner
0	99	SLSSDSTLLLFK	Phospho(S)@3		-0.0009	1389.68	2	16	1.1.1.1984.16	Winner
0	99	SLSSDSTLLLFK	Phospho(S)@3		-0.0015	1389.68	2	15	1.1.1.1990.11	Winner
0	99	SLSSDSTLLLFK	Phospho(S)@3		-0.0007	1389.68	2	19	1.1.1.1995.7	Winner
0	99	SLSSDSTLLLFK	Phospho(S)@3		-0.0012	1389.68	2	17	1.1.1.2000.10	Winner
0	99	SLSSDSTLLLFK	Phospho(S)@3		-0.0005	1389.68	2	15	1.1.1.2006.11	Winner
0	99	SLSSDSTLLLFK	Phospho(S)@3		0.0039	1389.68	2	18	1.1.1.2012.5	Winner
0	99	SLSSDSTLLLFK	Phospho(S)@3		0.0039	1389.68	2	18	1.1.1.2017.10	Winner
0	99	SLSSDSTLLLFK	Phospho(S)@3		0.0047	1389.68	2	17	1.1.1.2023.6	Winner
0	99	SLSSDSTLLLFK	Phospho(S)@3		0.0047	1389.68	2	17	1.1.1.2029.4	Winner
0	99	SLSSDSTLLLFK	Phospho(S)@3		0.0017	1389.68	2	12	1.1.1.2034.10	Winner
0	99	SLSSDSTLLLFK	Phospho(S)@3		0.0015	1389.68	2	15	1.1.1.2042.11	Winner
0	99	SPSPGLFR	Phospho(S)@3		-0.0012	939.42	2	11	1.1.1.1325.5	Winner
0	99	SPSPGLFR	Phospho(S)@3		-0.0012	939.42	2	12	1.1.1.1342.7	Winner
0	99	SPSPGLFR	Phospho(S)@3		-0.0007	939.421	2	11	1.1.1.1363.7	Winner
0	98.6	SPSPGLFR	Phospho(S)@3		0.0004	939.422	2	11	1.1.1.1353.3	Winner
0	97.8	SPSPGLFR	Phospho(S)@3		-0.0012	939.42	2	11	1.1.1.1337.7	Winner
0	97.8	SPSPGLFR	Phospho(S)@3		-0.0014	939.42	2	10	1.1.1.1358.6	Winner
0	97.7	SPSPGLFR	Phospho(S)@3		0.0015	939.423	2	9	1.1.1.1383.4	Winner
0	97.5	SPSPGLFR	Phospho(S)@3		-0.0014	939.42	2	11	1.1.1.1331.6	Winner
0	97.1	SPSPGLFR	Phospho(S)@3		0.0015	939.423	2	9	1.1.1.1388.3	Winner
0	96.7	SPSPGLFR	Phospho(S)@3		0.0018	939.423	2	9	1.1.1.1378.4	Winner
0	95.8	SPSPGLFR	Phospho(S)@3		-0.0007	939.421	2	10	1.1.1.1373.7	Winner
0	94.9	SPSPGLFR	Phospho(S)@3		-0.0007	939.421	2	9	1.1.1.1368.7	Winner
0	93.8	SPSPGLFR	Phospho(S)@3		-0.0012	939.42	2	10	1.1.1.1347.6	Winner
0	93.4	SPSPGLFR	Phospho(S)@3		0.0016	939.423	2	9	1.1.1.1393.4	Winner
0	98.5	ESSHNSSFELIGSTIPSYQPCNR	Phospho(S)@3; Propionamide(C)@21		0.0012	2703.16	3	13	1.1.1.1665.17	Winner
0	26.4	KKEPSLESGVHSFEEGSELSK	Phospho(S)@5	missed K-K@1; missed K-E@2	-0.0032	2383.09	4	9	1.1.1.1344.9	Winner
0.36	98.8	FVFHTLSPVKAEAAK	Phospho(S)@7	cleaved N-F@N-term; missed K-A@10	-0.0034	1723.87	3	13	1.1.1.1418.10	Winner
2	99	NFVFHTLSPVK	Phospho(S)@8		0.0019	1367.67	2	19	1.1.1.1558.14	Winner
2	99	NFVFHTLSPVKAEAAK	Phospho(S)@8	missed K-A@11	0.0003	1837.91	3	22	1.1.1.1475.13	Winner
0	99	NFVFHTLSPVK	Phospho(S)@8		0.0019	1367.67	2	17	1.1.1.1548.11	Winner
0	99	NFVFHTLSPVK	Phospho(S)@8		0.0019	1367.67	2	18	1.1.1.1553.11	Winner
0	99	NFVFHTLSPVK	Phospho(S)@8		0.0022	1367.67	2	16	1.1.1.1563.15	Winner
0	99	NFVFHTLSPVK	Phospho(S)@8		0.0016	1367.67	2	15	1.1.1.1568.17	Winner
0	99	NFVFHTLSPVK	Phospho(S)@8		0.0003	1367.66	2	16	1.1.1.1574.10	Winner
0	99	NFVFHTLSPVK	Phospho(S)@8		0.0003	1367.66	2	15	1.1.1.1580.11	Winner
0	97.2	NFVFHTLSPVK	Phospho(S)@8		-0.0019	1367.66	2	10	1.1.1.1585.8	Winner
0	42.4	NFVFHTLSPVK	Phospho(S)@8		-0.0047	1367.66	2	8	1.1.1.1601.11	Winner
0	38.4	NFVFHTLSPVK	Phospho(S)@8		0.0036	1367.67	3	8	1.1.1.1543.2	Winner
0	< 1	NFVFHTLSPVK	Phospho(S)@8		0.0018	1367.67	3	5	1.1.1.1571.5	Winner
0	< 1	NFVFHTLSPVK	Phospho(S)@8		-0.0076	1367.66	2	7	1.1.1.1596.10	Winner
0	99	NFVFHTLSPVKAEAAK	Phospho(S)@8	missed K-A@11	0.0008	1837.91	3	22	1.1.1.1450.11	Winner
0	99	NFVFHTLSPVKAEAAK	Phospho(S)@8	missed K-A@11	0.0008	1837.91	3	22	1.1.1.1455.13	Winner
0	99	NFVFHTLSPVKAEAAK	Phospho(S)@8	missed K-A@11	0.0008	1837.91	3	23	1.1.1.1460.14	Winner
0	99	NFVFHTLSPVKAEAAK	Phospho(S)@8	missed K-A@11	0.0008	1837.91	3	23	1.1.1.1465.17	Winner
0	99	NFVFHTLSPVKAEAAK	Phospho(S)@8	missed K-A@11	0.0006	1837.91	3	22	1.1.1.1470.13	Winner
0	99	NFVFHTLSPVKAEAAK	Phospho(S)@8	missed K-A@11	-0.0003	1837.91	3	19	1.1.1.1480.15	Winner
0	99	NFVFHTLSPVKAEAAK	Phospho(S)@8	missed K-A@11	-0.0006	1837.91	3	19	1.1.1.1485.13	Winner
0	99	NFVFHTLSPVKAEAAK	Phospho(S)@8	missed K-A@11	-0.0003	1837.91	3	17	1.1.1.1490.12	Winner
0	99	NFVFHTLSPVKAEAAK	Phospho(S)@8	missed K-A@11	-0.0006	1837.91	3	17	1.1.1.1495.13	Winner
0	99	NFVFHTLSPVKAEAAK	Phospho(S)@8	missed K-A@11	0.0003	1837.91	3	14	1.1.1.1500.10	Winner
0	99	NFVFHTLSPVKAEAAK	Phospho(S)@8	missed K-A@11	0.0003	1837.91	3	17	1.1.1.1505.12	Winner
0	99	NFVFHTLSPVKAEAAK	Phospho(S)@8	missed K-A@11	-0.0016	1837.91	3	16	1.1.1.2539.3	Winner
0	93.7	NFVFHTLSPVKAEAAK	Phospho(S)@8	missed K-A@11	0.0045	1837.92	3	11	1.1.1.1523.12	Winner
0	80.9	NFVFHTLSPVKAEAAK	Phospho(S)@8	missed K-A@11	0.0003	1837.91	3	10	1.1.1.1510.13	Winner
0	< 1	NFVFHTLSPVKAEAAK	Phospho(S)@8	missed K-A@11	0.0026	1837.92	3	6	1.1.1.1579.7	Winner
0	< 1	NFVFHTLSPVKAEAAK	Phospho(S)@8	missed K-A@11	0.003	1837.92	3	5	1.1.1.1618.7	Winner
0	81.9	ESSHNSSFELIGSTIPSYQPCNR	Phospho(T)@14		-0.0073	2632.12	3	10	1.1.1.1695.17	Winner
0	82.7	ETQIITGSDESCRK	Phospho(T)@2	missed R-K@13	-0.0094	1645.69	2	8	1.1.1.986.20	Winner
0	< 1	KPRPTCHGNAMALLK	Phospho(T)@5		0.0077	1715.84	4	6	1.1.1.921.4	Winner
0	39.9	NFVFHTLSPVK	Phospho(T)@6		-0.0053	1367.66	2	7	1.1.1.1614.12	Winner
0	14.5	NFVFHTLSPVKAEAAK	Phospho(T)@6	missed K-A@11	0.0044	1837.92	3	8	1.1.1.1573.5	Winner
0	56.3	ENMEELLNLCSGK	Propionamide(C)@10		-0.0029	1549.71	2	9	1.1.1.1689.18	Winner
2	99	ETQIITGSDESCR	Propionamide(C)@12		-0.0004	1508.68	2	18	1.1.1.1031.17	Winner
0	99	ETQIITGSDESCR	Propionamide(C)@12		-0.0004	1508.68	2	22	1.1.1.1036.19	Winner
0	99	ETQIITGSDESCR	Propionamide(C)@12		-0.0004	1508.68	2	18	1.1.1.1041.21	Winner
0	99	ETQIITGSDESCRK	Propionamide(C)@12	missed R-K@13	-0.0001	1636.77	3	15	1.1.1.923.13	Winner
0	99	ETQIITGSDESCRK	Propionamide(C)@12	missed R-K@13	-0.0001	1636.77	3	15	1.1.1.929.12	Winner
0	99	ETQIITGSDESCRK	Propionamide(C)@12	missed R-K@13	-0.0001	1636.77	3	12	1.1.1.935.16	Winner
0	< 1	ETQIITGSDESCRK	Propionamide(C)@12	missed R-K@13	-0.0001	1636.77	3	7	1.1.1.936.15	Winner
0	< 1	ETQIITGSDESCRK	Propionamide(C)@12	missed R-K@13	0.0003	1636.77	3	7	1.1.1.941.15	Winner
0	40.8	ETQIITGSDESCRK	Propionamide(C)@12; Deamidated(R)@13	missed R-K@13	0.0035	1637.76	3	11	1.1.1.974.6	Winner
2	99	NQEDDVEQPFNDSGCLLVDK	Propionamide(C)@15		0.006	2335.03	3	15	1.1.1.1586.19	Winner
0	99	NQEDDVEQPFNDSGCLLVDK	Propionamide(C)@15		0.006	2335.03	3	12	1.1.1.1581.13	Winner
2	99	SETDENSGKQPSKLDEDDSCSLLTK	Propionamide(C)@20	missed K-Q@9; missed K-L@13	-0.0028	2796.26	4	26	1.1.1.1170.19	Winner
0	99	SETDENSGKQPSKLDEDDSCSLLTK	Propionamide(C)@20	missed K-Q@9; missed K-L@13	-0.0028	2796.26	4	20	1.1.1.1164.17	Winner
0	99	SETDENSGKQPSKLDEDDSCSLLTK	Propionamide(C)@20	missed K-Q@9; missed K-L@13	0.0028	2796.26	3	14	1.1.1.1168.21	Winner
0	99	SETDENSGKQPSKLDEDDSCSLLTK	Propionamide(C)@20	missed K-Q@9; missed K-L@13	0.0028	2796.26	3	18	1.1.1.1169.20	Winner
0	99	SETDENSGKQPSKLDEDDSCSLLTK	Propionamide(C)@20	missed K-Q@9; missed K-L@13	0.0028	2796.26	3	12	1.1.1.1171.21	Winner
0	96.1	SETDENSGKQPSKLDEDDSCSLLTK	Propionamide(C)@20	missed K-Q@9; missed K-L@13	-0.0056	2796.25	4	12	1.1.1.1175.18	Winner
0	99	ESSHNSSFELIGSTIPSYQPCNR	Propionamide(C)@21		-0.0022	2623.19	3	16	1.1.1.1590.19	Winner
0	99	ESSHNSSFELIGSTIPSYQPCNR	Propionamide(C)@21		-0.0022	2623.19	3	19	1.1.1.1596.19	Winner
0	99	ESSHNSSFELIGSTIPSYQPCNR	Propionamide(C)@21		-0.0022	2623.19	3	18	1.1.1.1601.19	Winner
0	99	MGYFPTEEKSETDENSGKQPSKLDEDDSCSLLTK	Propionamide(C)@29	missed K-S@9; missed K-Q@18; missed K-L@22	0.0022	3878.74	5	16	1.1.1.1391.17	Winner
0	99	PTCHGNAMALLK	Propionamide(C)@3; Oxidation(M)@8	cleaved R-P@N-term	-0.0008	1341.65	3	13	1.1.1.963.4	Winner
0	54.8	KPRPTCHGNAMALLK	Propionamide(C)@6		-0.0006	1706.91	4	10	1.1.1.980.4	Winner
0	< 1	KPRPTCHGNAMALLK	Propionamide(C)@6		-0.0006	1706.91	4	6	1.1.1.986.4	Winner
0	99	KPRPTCHGNAMALLK	Propionamide(C)@6; Oxidation(M)@11		-0.0001	1722.9	3	14	1.1.1.843.13	Winner
2	99	LDEDDSCSLLTK	Propionamide(C)@7		-0.0029	1408.64	2	19	1.1.1.1258.18	Winner
0	99	LDEDDSCSLLTK	Propionamide(C)@7		-0.0029	1408.64	2	18	1.1.1.1264.20	Winner
0	85.2	LDEDDSCSLLTK	Propionamide(C)@7		-0.0029	1408.64	2	10	1.1.1.1270.17	Winner
0	< 1	RKPRPTCHGNAMALLK	Propionamide(C)@7; Oxidation(M)@12	missed R-K@1	-0.0041	1879	4	7	1.1.1.808.11	Winner
0	5	LDEDDSCSLLTK	Propionamide(C)@7; Phospho(T)@11		0.0056	1488.61	2	8	1.1.1.1451.17	Winner
0	99	ENMEELLNLCSGK	Trioxidation(C)@10		-0.0024	1526.66	2	17	1.1.1.1721.14	Winner
0	99	ENMEELLNLCSGK	Trioxidation(C)@10		-0.0024	1526.66	2	19	1.1.1.1726.18	Winner
0	99	ENMEELLNLCSGK	Trioxidation(C)@10		-0.0024	1526.66	2	15	1.1.1.1731.15	Winner
0	98.3	ENMEELLNLCSGK	Trioxidation(C)@10		-0.0026	1526.66	2	12	1.1.1.1716.16	Winner
0	99	ENMEELLNLCSGK	Trioxidation(C)@10; Delta:H(4)C(2)(K)@13		-0.0166	1554.67	2	14	1.1.1.1827.16	Winner
0.12	97.9	QPSKLDEDDSCSLLTK	Trioxidation(C)@11	missed K-L@4	0.0004	1825.83	2	11	1.1.1.1211.21	Winner
1.54	99	ETQIITGSDESCRKDLVK	Trioxidation(C)@12	missed R-K@13; missed K-D@14	-0.0036	2068.99	3	18	1.1.1.1132.18	Winner
1.43	99	ETQIITGSDESCRKDLVKNEELEIQEK	Trioxidation(C)@12	missed R-K@13; missed K-D@14; missed K-N@18	0.0044	3181.53	4	16	1.1.1.1381.19	Winner
0	99	ETQIITGSDESCRK	Trioxidation(C)@12	missed R-K@13	0.0002	1613.72	2	17	1.1.1.952.21	Winner
0	99	ETQIITGSDESCRK	Trioxidation(C)@12	missed R-K@13	0.0002	1613.72	2	23	1.1.1.958.14	Winner
0	99	ETQIITGSDESCR	Trioxidation(C)@12; Dimethyl(R)@13		-0.0167	1513.64	2	15	1.1.1.1116.21	Winner
0	49.9	ETQIITGSDESCRK	Trioxidation(C)@12; Formyl(K)@14	missed R-K@13	0.018	1641.73	3	12	1.1.1.994.16	Winner
0	12.5	KSDKKENMEELLNLCSGK	Trioxidation(C)@15	missed K-S@1; missed K-K@4; missed K-E@5	0.0005	2113	4	9	1.1.1.1358.11	Winner
0	99	SETDENSGKQPSKLDEDDSCSLLTK	Trioxidation(C)@20	missed K-Q@9; missed K-L@13	0.008	2773.22	3	25	1.1.1.1163.21	Winner
0	99	SETDENSGKQPSKLDEDDSCSLLTK	Trioxidation(C)@20	missed K-Q@9; missed K-L@13	0.008	2773.22	3	20	1.1.1.1169.19	Winner
2	99	ESSHNSSFELIGSTIPSYQPCNR	Trioxidation(C)@21		-0.0001	2600.14	3	21	1.1.1.1654.18	Winner
0	99	ESSHNSSFELIGSTIPSYQPCNR	Trioxidation(C)@21		-0.0001	2600.14	3	23	1.1.1.1660.18	Winner
0	91.3	ESSHNSSFELIGSTIPSYQPCNR	Trioxidation(C)@21		-0.0001	2600.14	3	12	1.1.1.1665.16	Winner
0	99	ESSHNSSFELIGSTIPSYQPCNR	Trioxidation(C)@21; Dimethyl(N)@22		-0.0188	2628.16	3	18	1.1.1.1647.16	Winner
0	69.5	MGYFPTEEKSETDENSGKQPSKLDEDDSCSLLTK	Trioxidation(C)@29	missed K-S@9; missed K-Q@18; missed K-L@22	0.0081	3855.69	4	11	1.1.1.1412.19	Winner
0	35.9	PTCHGNAMALLK	Trioxidation(C)@3; Dioxidation(M)@8	cleaved R-P@N-term	0.0053	1334.6	2	11	1.1.1.1091.18	Winner
0	99	PTCHGNAMALLK	Trioxidation(C)@3; Oxidation(M)@8	cleaved R-P@N-term	0.0008	1318.6	2	17	1.1.1.1046.19	Winner
0	99	PTCHGNAMALLK	Trioxidation(C)@3; Oxidation(M)@8	cleaved R-P@N-term	0.0008	1318.6	2	20	1.1.1.1051.16	Winner
0	44.4	KPRPTCHGNAMALLK	Trioxidation(C)@6		0.0009	1683.86	4	9	1.1.1.1063.3	Winner
0	88.2	KPRPTCHGNAMALLK	Trioxidation(C)@6; Delta:H(4)C(2)(H)@7; Oxidation(M)@11		-0.0188	1727.86	3	14	1.1.1.904.17	Winner
1.59	99	KPRPTCHGNAMALLK	Trioxidation(C)@6; Oxidation(M)@11		-0.0025	1699.85	3	25	1.1.1.900.15	Winner
0	82.1	KPRPTCHGNAMALLK	Trioxidation(C)@6; Oxidation(M)@11		-0.0025	1699.85	3	12	1.1.1.894.17	Winner
0	57.9	RKPRPTCHGNAMALLK	Trioxidation(C)@7; Oxidation(M)@12	missed R-K@1	-0.0013	1855.95	3	10	1.1.1.845.19	Winner
2	99	AALSDHNPSAPR		cleaved L-A@N-term	-0.0013	1234.6	2	14	1.1.1.1002.19	Winner
2	99	ADGDLHSDGPGR		cleaved L-A@N-term	0.001	1195.52	2	14	1.1.1.1061.18	Winner
2	99	ADVVPVTLAPK			-0.0014	1108.65	2	16	1.1.1.1347.10	Winner
2	99	AGQTVNVNVIVK			-0.0028	1240.71	2	19	1.1.1.1294.13	Winner
2	99	ALEGEGPQNPEETDEKVEEPEQQNK		cleaved H-A@N-term; missed K-V@16	0.0063	2823.27	3	17	1.1.1.1117.21	Winner
2	99	ALSDHNPSAPR		cleaved A-A@N-term	-0.0002	1163.57	2	15	1.1.1.1007.13	Winner
2	99	ASLVSSASK			-0.0005	848.46	2	10	1.1.1.832.3	Winner
2	99	AVGFLSVPK			0.0012	916.539	2	15	1.1.1.1437.3	Winner
2	99	DEKEMDKENNDGSSEIGK		missed K-E@3; missed K-E@7	-0.0026	2023.86	3	20	1.1.1.847.20	Winner
2	99	DLVKNEELEIQEK		missed K-N@4	-0.0011	1585.82	3	20	1.1.1.1297.11	Winner
2	99	DMGTDGKEELKADVVPVTLAPK		missed K-E@7; missed K-A@11	-0.0018	2312.19	3	24	1.1.1.1477.18	Winner
2	99	DSDDDQTEEQLDESEAR			0.0026	1980.77	2	24	1.1.1.1077.21	Winner
2	99	EPSLESGVHSFEEGSELSK			-0.0008	2046.94	3	22	1.1.1.1474.14	Winner
2	99	FTSQDASTPASSELNK			0.0023	1681.78	2	15	1.1.1.1108.20	Winner
2	99	FTSQDASTPASSELNKQEK		missed K-Q@16	0.001	2066.98	3	17	1.1.1.1068.17	Winner
2	99	GPSFMTSPSPK			0	1134.54	2	14	1.1.1.1163.12	Winner
2	99	GSEQTTGAENEVETN		cleaved N-A@C-term	0.004	1564.65	2	12	1.1.1.934.20	Winner
2	99	GSEQTTGAENEVETNALPVVSK			0.0011	2259.09	2	25	1.1.1.1380.21	Winner
2	99	GTSFFPTAGGFR			0.0012	1243.6	2	19	1.1.1.1565.11	Winner
2	99	HLKTDDSTSGLTR		missed K-T@3	0	1429.72	3	19	1.1.1.821.7	Winner
2	99	IEREQWLR		missed R-E@3	0.0012	1128.61	2	12	1.1.1.1112.17	Winner
2	99	KDLVKNEELEIQEK		missed K-D@1; missed K-N@5	0.0003	1713.92	3	18	1.1.1.1120.14	Winner
2	99	KEPSLESGVHSFEEGSELSK		missed K-E@1	-0.0008	2175.03	4	25	1.1.1.1360.6	Winner
2	99	KKEPSLESGVHSFEEGSELSK		missed K-K@1; missed K-E@2	-0.0043	2303.12	4	27	1.1.1.1259.11	Winner
2	99	LAALSDHNPSAPR			0.0026	1347.69	3	18	1.1.1.1008.9	Winner
2	99	LGADEDSFVILEPETNR			0.0002	1903.92	2	19	1.1.1.1691.21	Winner
2	99	LGADEDSFVILEPETNRELEALK		missed R-E@17	0.003	2587.3	3	20	1.1.1.1821.14	Winner
2	99	LKQLGVDVSIKPR		missed K-Q@2	-0.0031	1451.88	3	19	1.1.1.1217.10	Winner
2	99	LSEPSLPIEDSQDLYNASPEPK			-0.0014	2428.16	3	22	1.1.1.1667.17	Winner
2	99	MGYFPTEEKSETDENSGK		missed K-S@9	0.0009	2047.87	3	20	1.1.1.1164.15	Winner
2	99	MGYFPTEEKSETDENSGKQPSK		missed K-S@9; missed K-Q@18	0.0023	2488.11	4	15	1.1.1.1087.13	Winner
2	99	NASRPMVIQESK			-0.0012	1358.7	2	17	1.1.1.918.18	Winner
2	99	NEELEIQEK			0.0005	1130.55	2	15	1.1.1.1057.15	Winner
2	99	NPFEAIRPGSAQQVK			-0.0014	1640.86	2	25	1.1.1.1233.18	Winner
2	99	NQYQALKPR			-0.0008	1116.6	2	15	1.1.1.882.17	Winner
2	99	PEETDEKVEEPEQQNK		cleaved N-P@N-term; missed K-V@7	0.0008	1927.87	3	19	1.1.1.871.20	Winner
2	99	RGPSFMTSPSPK		missed R-G@1	-0.0001	1290.64	2	14	1.1.1.1047.20	Winner
2	99	SLSSDSTLLLFK			-0.0017	1309.71	2	17	1.1.1.1714.10	Winner
2	99	SLYQENLEAQVK		cleaved K-P@C-term	0.0007	1420.72	2	16	1.1.1.1300.20	Winner
2	99	SPSPGLFR			0.0004	859.456	2	12	1.1.1.1169.3	Winner
2	99	SSAVGPPEK			-0.0018	870.443	2	10	1.1.1.802.4	Winner
2	99	TDDSTSGLTR			0	1051.48	2	16	1.1.1.828.10	Winner
2	99	TMLDDDKR		missed K-R@7	0.0006	992.46	2	8	1.1.1.815.9	Winner
2	99	TTYDSAEEENKENLYAGK		missed K-E@11	0.0017	2060.92	3	16	1.1.1.1083.17	Winner
2	99	TVADSDESYMEK			-0.0001	1373.57	2	21	1.1.1.1040.19	Winner
2	99	YLADGDLHSDGPGR			0.0008	1471.67	3	16	1.1.1.1041.13	Winner
2	99	YQSSHHKEIIDTANTTEMNSDHHSK		missed K-E@7	-0.0035	2909.3	5	18	1.1.1.894.20	Winner
1.96	99	PMVIQESK		cleaved R-P@N-term	-0.0006	930.484	2	12	1.1.1.959.10	Winner
1.85	99	TIHDFFK			-0.0009	906.459	2	11	1.1.1.1219.7	Winner
1.22	95.7	EELKADVVPVTLAPK		missed K-A@4	-0.0004	1607.91	3	11	1.1.1.1426.6	Winner
1.06	93.6	DMGTDGKEELK		missed K-E@7	-0.0016	1221.55	3	10	1.1.1.890.4	Winner
0.89	90.5	TIHDFFKR		missed K-R@7	-0.0003	1062.56	2	9	1.1.1.1100.15	Winner
0.6	80.7	ELEALKQR		missed K-Q@6	-0.001	985.555	2	8	1.1.1.906.5	Winner
0.54	87.1	NPFEAIR		cleaved R-P@C-term	-0.0004	845.439	2	8	1.1.1.1222.4	Winner
0.29	57.2	EALKQLHSETQR		missed K-Q@4	-0.004	1438.75	3	9	1.1.1.850.7	Winner
0.25	97.4	GTSFFPTAGGF		cleaved F-R@C-term	0.0005	1087.5	2	12	1.1.1.1833.5	Winner
0.16	38.1	RFTLDR		missed R-F@1	0.0011	806.441	2	8	1.1.1.944.2	Winner
0.09	75.2	SSDSTLLLFK		cleaved L-S@N-term	0.0022	1109.6	2	9	1.1.1.1581.9	Winner
0.06	92.8	IHDFFK		cleaved T-I@N-term	-0.0008	805.412	2	9	1.1.1.1206.2	Winner
0.06	16	SLLRNPFEAIRPGSAQQVK		missed R-N@4	-0.0016	2110.16	3	8	1.1.1.1488.17	Winner
0.05	77	PFEAIRPGSAQQVK		cleaved N-P@N-term	0.0008	1526.82	3	11	1.1.1.1112.8	Winner
0.04	64.8	FEAIRPGSAQQVK		cleaved P-F@N-term	0.0029	1429.77	3	10	1.1.1.1054.10	Winner
0.01	39.2	ESSHNSSFELIGSTIPSYQP		cleaved P-C@C-term	0.0031	2179.01	3	8	1.1.1.1731.13	Winner
0.01	81.8	GKEELKADVVPVTLAPK		cleaved D-G@N-term; missed K-E@2; missed K-A@6	0.0005	1793.03	4	10	1.1.1.1315.5	Winner
0.01	59.6	YQALKPR		cleaved Q-Y@N-term	-0.0014	874.501	2	8	1.1.1.883.6	Winner
0.01	62.9	VVPVTLAPK		cleaved D-V@N-term	-0.0016	922.583	2	8	1.1.1.1195.10	Winner
0	18	SFFPTAGGFR		cleaved T-S@N-term	0.0013	1085.53	2	8	1.1.1.1549.5	Winner
0	36.2	YLADGDLHSD		cleaved D-G@C-term	-0.001	1104.47	2	9	1.1.1.1077.13	Winner
0	3.6	LSDHNPSAPR		cleaved A-L@N-term	0.0076	1092.54	2	8	1.1.1.1005.7	Winner
0	99	ADGDLHSDGPGR		cleaved L-A@N-term	0.001	1195.52	2	14	1.1.1.1055.19	Winner
0	99	ADVVPVTLAPK			-0.0014	1108.65	2	13	1.1.1.1342.11	Winner
0	99	ADVVPVTLAPK			-0.0014	1108.65	2	15	1.1.1.1353.8	Winner
0	99	ADVVPVTLAPK			-0.0014	1108.65	2	13	1.1.1.1358.12	Winner
0	< 1	ADVVPVTLAPK			-0.0057	1108.64	2	5	1.1.1.1381.11	Winner
0	99	AGQTVNVNVIVK			-0.0028	1240.71	2	16	1.1.1.1284.15	Winner
0	99	AGQTVNVNVIVK			-0.0028	1240.71	2	21	1.1.1.1289.16	Winner
0	99	ALEGEGPQNPEETDEKVEEPEQQNK		cleaved H-A@N-term; missed K-V@16	0.0063	2823.27	3	20	1.1.1.1111.21	Winner
0	99	ALSDHNPSAPR		cleaved A-A@N-term	-0.0002	1163.57	2	13	1.1.1.1001.18	Winner
0	53.8	ASLVSSASK			-0.0005	848.46	2	7	1.1.1.837.4	Winner
0	36.5	ASLVSSASK			-0.0005	848.46	2	5	1.1.1.827.2	Winner
0	< 1	ASTPASSELNK		cleaved D-A@N-term	0.0026	1103.55	2	6	1.1.1.861.14	Winner
0	99	AVGFLSVPK			0.0012	916.539	2	13	1.1.1.1421.4	Winner
0	99	AVGFLSVPK			0.0012	916.539	2	15	1.1.1.1427.2	Winner
0	99	AVGFLSVPK			0.0012	916.539	2	15	1.1.1.1433.2	Winner
0	99	AVGFLSVPK			0.0012	916.539	2	14	1.1.1.1439.3	Winner
0	99	AVGFLSVPK			0.0015	916.54	2	13	1.1.1.1445.5	Winner
0	99	AVGFLSVPK			0.0015	916.54	2	11	1.1.1.1450.6	Winner
0	73.9	AVGFLSVPK			0.0015	916.54	2	7	1.1.1.1481.3	Winner
0	71.8	AVGFLSVPK			0.0009	916.539	2	8	1.1.1.1455.5	Winner
0	71.2	AVGFLSVPK			0.0011	916.539	2	8	1.1.1.1470.2	Winner
0	63.1	AVGFLSVPK			0.0003	916.538	2	7	1.1.1.1476.5	Winner
0	39	AVGFLSVPK			0.0012	916.539	2	6	1.1.1.1486.3	Winner
0	15.8	AVGFLSVPK			0.0012	916.539	2	6	1.1.1.1495.6	Winner
0	< 1	AVGFLSVPK			0.0011	916.539	2	6	1.1.1.1465.4	Winner
0	< 1	AVGFLSVPK			-0.003	916.535	2	4	1.1.1.1512.3	Winner
0	< 1	AVGFLSVPK			-0.0041	916.534	2	4	1.1.1.1546.3	Winner
0	99	DLVKNEELEIQEK		missed K-N@4	-0.0011	1585.82	3	16	1.1.1.1287.9	Winner
0	99	DLVKNEELEIQEK		missed K-N@4	-0.0011	1585.82	3	20	1.1.1.1292.10	Winner
0	99	DLVKNEELEIQEK		missed K-N@4	-0.0011	1585.82	3	17	1.1.1.1293.9	Winner
0	99	DLVKNEELEIQEK		missed K-N@4	-0.0011	1585.82	3	19	1.1.1.1302.11	Winner
0	99	DLVKNEELEIQEK		missed K-N@4	-0.0011	1585.82	3	17	1.1.1.1307.10	Winner
0	42.1	DLVKNEELEIQEK		missed K-N@4	0.0248	1585.84	3	9	1.1.1.1335.10	Winner
0	< 1	DLVKNEELEIQEK		missed K-N@4	0.0013	1585.82	3	5	1.1.1.1492.10	Winner
0	34.5	DMGTDGKEELK		missed K-E@7	0.0014	1221.56	3	7	1.1.1.884.3	Winner
0	99	DMGTDGKEELKADVVPVTLAPK		missed K-E@7; missed K-A@11	-0.0001	2312.19	4	18	1.1.1.1465.13	Winner
0	99	DMGTDGKEELKADVVPVTLAPK		missed K-E@7; missed K-A@11	-0.0018	2312.19	3	19	1.1.1.1465.21	Winner
0	99	DMGTDGKEELKADVVPVTLAPK		missed K-E@7; missed K-A@11	-0.0001	2312.19	4	24	1.1.1.1470.9	Winner
0	99	DMGTDGKEELKADVVPVTLAPK		missed K-E@7; missed K-A@11	-0.0001	2312.19	4	22	1.1.1.1475.11	Winner
0	99	DMGTDGKEELKADVVPVTLAPK		missed K-E@7; missed K-A@11	-0.0018	2312.19	3	15	1.1.1.1479.18	Winner
0	99	DMGTDGKEELKADVVPVTLAPK		missed K-E@7; missed K-A@11	0.0004	2312.19	4	16	1.1.1.1480.11	Winner
0	98.5	DMGTDGKEELKADVVPVTLAPK		missed K-E@7; missed K-A@11	-0.0026	2312.19	3	12	1.1.1.1482.16	Winner
0	99	DSDDDQTEEQLDESEAR			0.0026	1980.77	2	24	1.1.1.1071.21	Winner
0	< 1	EALKQLHSETQR		missed K-Q@4	-0.004	1438.75	3	7	1.1.1.853.8	Winner
0	88.5	EELKADVVPVTLAPK		missed K-A@4	-0.0004	1607.91	3	10	1.1.1.1420.5	Winner
0	49.9	EELKADVVPVTLAPK		missed K-A@4	-0.0004	1607.91	3	9	1.1.1.1425.9	Winner
0	99	EIIDTANTTEMNSDHHSK			0.0001	2041.9	3	18	1.1.1.1007.16	Winner
0	99	EIIDTANTTEMNSDHHSK			0.0036	2041.91	2	16	1.1.1.1010.18	Winner
0	99	EIIDTANTTEMNSDHHSK			0.0036	2041.91	2	13	1.1.1.1011.21	Winner
0	99	EIIDTANTTEMNSDHHSK			0.0036	2041.91	2	16	1.1.1.1012.21	Winner
0	99	EIIDTANTTEMNSDHHSK			0.0012	2041.9	4	18	1.1.1.1013.12	Winner
0	99	EIIDTANTTEMNSDHHSK			0.0036	2041.91	2	11	1.1.1.1013.21	Winner
0	99	EIIDTANTTEMNSDHHSK			0.0012	2041.9	4	12	1.1.1.1019.10	Winner
0	99	EMDKENNDGSSEIGK		missed K-E@4	-0.0027	1651.7	3	13	1.1.1.813.14	Winner
0	87.7	EMDKENNDGSSEIGK		missed K-E@4	-0.0027	1651.7	3	10	1.1.1.818.18	Winner
0	99	EPSLESGVHSFEEGSELSK			-0.0008	2046.94	3	14	1.1.1.1469.14	Winner
0	99	EPSLESGVHSFEEGSELSK			-0.0008	2046.94	3	20	1.1.1.1479.13	Winner
0	99	EPSLESGVHSFEEGSELSK			-0.0008	2046.94	3	15	1.1.1.1484.15	Winner
0	< 1	EPSLESGVHSFEEGSELSK			-0.0035	2046.94	2	3	1.1.1.1478.21	Winner
0	99	ESALNLPYHMPENK			0.0026	1641.78	3	13	1.1.1.1394.10	Winner
0	99	ESALNLPYHMPENK			0.0026	1641.78	3	16	1.1.1.1399.11	Winner
0	99	ESALNLPYHMPENK			0.0026	1641.78	3	16	1.1.1.1404.8	Winner
0	99	ESALNLPYHMPENK			0.0026	1641.78	3	15	1.1.1.1410.4	Winner
0	96.3	ESALNLPYHMPENK			0.0029	1641.78	3	11	1.1.1.1416.8	Winner
0	< 1	FEAIRPGSAQQVK		cleaved P-F@N-term	0.0029	1429.77	3	8	1.1.1.1049.7	Winner
0	< 1	FEEGSELSK		cleaved S-F@N-term	0.0008	1024.47	2	7	1.1.1.969.11	Winner
0	99	FTSQDASTPASSELNK			0.0034	1681.78	2	19	1.1.1.1087.21	Winner
0	99	FTSQDASTPASSELNK			0.0034	1681.78	2	28	1.1.1.1092.20	Winner
0	99	FTSQDASTPASSELNK			0.0034	1681.78	2	27	1.1.1.1097.21	Winner
0	99	FTSQDASTPASSELNK			0.0034	1681.78	2	21	1.1.1.1102.21	Winner
0	99	FTSQDASTPASSELNKQEK		missed K-Q@16	0.0019	2066.98	3	17	1.1.1.1046.20	Winner
0	99	FTSQDASTPASSELNKQEK		missed K-Q@16	0.0016	2066.98	3	25	1.1.1.1051.19	Winner
0	99	FTSQDASTPASSELNKQEK		missed K-Q@16	0.003	2066.98	2	19	1.1.1.1053.21	Winner
0	99	FTSQDASTPASSELNKQEK		missed K-Q@16	0.0016	2066.98	3	25	1.1.1.1056.18	Winner
0	99	FTSQDASTPASSELNKQEK		missed K-Q@16	0.0016	2066.98	3	19	1.1.1.1062.20	Winner
0	< 1	FVFHTLSPVK		cleaved N-F@N-term	-0.0052	1173.65	2	7	1.1.1.1378.10	Winner
0	99	GPSFMTSPSPK			0	1134.54	2	16	1.1.1.1145.7	Winner
0	99	GPSFMTSPSPK			0	1134.54	2	19	1.1.1.1151.8	Winner
0	99	GPSFMTSPSPK			0	1134.54	2	19	1.1.1.1157.11	Winner
0	99	GSEQTTGAENEVETNALPVVSK			0.0014	2259.09	3	31	1.1.1.1378.17	Winner
0	99	GSEQTTGAENEVETNALPVVSK			0.0011	2259.09	2	23	1.1.1.1379.21	Winner
0	99	GSEQTTGAENEVETNALPVVSK			0.0011	2259.09	2	28	1.1.1.1381.21	Winner
0	99	GSEQTTGAENEVETNALPVVSK			0.0011	2259.09	2	28	1.1.1.1382.21	Winner
0	99	GSEQTTGAENEVETNALPVVSK			0.0014	2259.09	3	32	1.1.1.1383.16	Winner
0	99	GSEQTTGAENEVETNALPVVSK			0.0011	2259.09	2	30	1.1.1.1384.21	Winner
0	99	GSEQTTGAENEVETNALPVVSK			0.0011	2259.09	2	30	1.1.1.1385.20	Winner
0	99	GSEQTTGAENEVETNALPVVSK			0.0014	2259.09	3	32	1.1.1.1388.18	Winner
0	99	GSEQTTGAENEVETNALPVVSK			0.0014	2259.09	3	25	1.1.1.1393.19	Winner
0	99	GSEQTTGAENEVETNALPVVSK			0.001	2259.09	3	18	1.1.1.1398.19	Winner
0	95.8	GTSFFPTAGGF		cleaved F-R@C-term	0.0005	1087.5	2	10	1.1.1.1843.4	Winner
0	93.5	GTSFFPTAGGF		cleaved F-R@C-term	0.0005	1087.5	2	11	1.1.1.1838.5	Winner
0	64.6	GTSFFPTAGGF		cleaved F-R@C-term	0.0005	1087.5	2	8	1.1.1.1828.5	Winner
0	99	GTSFFPTAGGFR			0.0011	1243.6	2	12	1.1.1.1560.7	Winner
0	99	GTSFFPTAGGFR			0.0012	1243.6	2	19	1.1.1.1570.11	Winner
0	99	GTSFFPTAGGFR			0.0002	1243.6	2	19	1.1.1.1576.9	Winner
0	99	GTSFFPTAGGFR			0.0004	1243.6	2	19	1.1.1.1582.9	Winner
0	99	GTSFFPTAGGFR			0.0004	1243.6	2	16	1.1.1.1587.10	Winner
0	99	GTSFFPTAGGFR			0.0002	1243.6	2	12	1.1.1.1593.11	Winner
0	99	GTSFFPTAGGFR			-0.0002	1243.6	2	12	1.1.1.1603.14	Winner
0	99	GTSFFPTAGGFR			0.0007	1243.6	2	10	1.1.1.1608.16	Winner
0	98.3	GTSFFPTAGGFR			0	1243.6	2	10	1.1.1.1616.4	Winner
0	97.1	GTSFFPTAGGFR			-0.0002	1243.6	2	10	1.1.1.1598.11	Winner
0	< 1	GTSFFPTAGGFR			0.0015	1243.6	2	6	1.1.1.1544.8	Winner
0	< 1	GTSFFPTAGGFR			0.003	1243.6	2	4	1.1.1.1623.9	Winner
0	< 1	GTSFFPTAGGFR			0.0008	1243.6	2	6	1.1.1.1627.10	Winner
0	< 1	GTSFFPTAGGFRSPSPGLFR		missed R-S@12	-0.005	2085.04	3	4	1.1.1.1711.13	Winner
0	< 1	GVDVSIKPR		cleaved L-G@N-term	0.002	969.563	2	5	1.1.1.1226.11	Winner
0	47.7	GVHSFEEGSELSK		cleaved S-G@N-term	-0.0311	1404.62	2	10	1.1.1.1474.15	Winner
0	99	HLKTDDSTSGLTR		missed K-T@3	0	1429.72	3	16	1.1.1.826.10	Winner
0	99	HLKTDDSTSGLTR		missed K-T@3	-0.0004	1429.72	3	11	1.1.1.831.10	Winner
0	99	IEREQWLR		missed R-E@3	0.0012	1128.61	2	11	1.1.1.1112.16	Winner
0	75.3	IEREQWLR		missed R-E@3	0.0012	1128.61	2	9	1.1.1.1118.17	Winner
0	< 1	IEREQWLR		missed R-E@3	0.0012	1128.61	2	5	1.1.1.1106.20	Winner
0	< 1	IHDFFK		cleaved T-I@N-term	-0.0008	805.412	2	6	1.1.1.1211.2	Winner
0	99	KDLVKNEELEIQEK		missed K-D@1; missed K-N@5	0.0003	1713.92	3	22	1.1.1.1125.12	Winner
0	99	KDLVKNEELEIQEK		missed K-D@1; missed K-N@5	0.0003	1713.92	3	18	1.1.1.1130.13	Winner
0	96.8	KDLVKNEELEIQEK		missed K-D@1; missed K-N@5	0.0026	1713.92	4	11	1.1.1.1127.4	Winner
0	99	KEPSLESGVHSFEEGSELSK		missed K-E@1	0.0002	2175.03	3	15	1.1.1.1350.18	Winner
0	99	KEPSLESGVHSFEEGSELSK		missed K-E@1	-0.0008	2175.03	4	26	1.1.1.1355.6	Winner
0	99	KEPSLESGVHSFEEGSELSK		missed K-E@1	0.0002	2175.03	3	28	1.1.1.1358.18	Winner
0	99	KEPSLESGVHSFEEGSELSK		missed K-E@1	0.0002	2175.03	3	24	1.1.1.1362.18	Winner
0	99	KEPSLESGVHSFEEGSELSK		missed K-E@1	0.0002	2175.03	3	15	1.1.1.1365.12	Winner
0	99	KKEPSLESGVHSFEEGSELSK		missed K-K@1; missed K-E@2	-0.0043	2303.12	4	14	1.1.1.1244.12	Winner
0	99	KKEPSLESGVHSFEEGSELSK		missed K-K@1; missed K-E@2	-0.0032	2303.12	3	26	1.1.1.1246.19	Winner
0	99	KKEPSLESGVHSFEEGSELSK		missed K-K@1; missed K-E@2	-0.0043	2303.12	4	29	1.1.1.1252.8	Winner
0	99	KKEPSLESGVHSFEEGSELSK		missed K-K@1; missed K-E@2	-0.0032	2303.12	3	19	1.1.1.1260.19	Winner
0	99	KKEPSLESGVHSFEEGSELSK		missed K-K@1; missed K-E@2	-0.0046	2303.12	4	19	1.1.1.1264.12	Winner
0	99	KKEPSLESGVHSFEEGSELSK		missed K-K@1; missed K-E@2	-0.0043	2303.12	4	13	1.1.1.1269.12	Winner
0	98.9	KKEPSLESGVHSFEEGSELSK		missed K-K@1; missed K-E@2	-0.0036	2303.12	3	12	1.1.1.1263.19	Winner
0	52	KKEPSLESGVHSFEEGSELSK		missed K-K@1; missed K-E@2	-0.0036	2303.12	3	9	1.1.1.1262.21	Winner
0	13.1	KKEPSLESGVHSFEEGSELSK		missed K-K@1; missed K-E@2	-0.0039	2303.12	4	8	1.1.1.1273.12	Winner
0	99	KRGPSFMTSPSPK		missed K-R@1; missed R-G@2	0.0008	1418.73	3	14	1.1.1.928.8	Winner
0	99	KRGPSFMTSPSPK		missed K-R@1; missed R-G@2	0.0008	1418.73	3	12	1.1.1.933.14	Winner
0	99	KRGPSFMTSPSPK		missed K-R@1; missed R-G@2	0.0008	1418.73	3	15	1.1.1.934.10	Winner
0	< 1	LAALSDHN		cleaved N-P@C-term	-0.0037	839.41	2	6	1.1.1.898.3	Winner
0	< 1	LAALSDHNP		cleaved P-S@C-term	0.007	936.473	2	5	1.1.1.1125.2	Winner
0	99	LAALSDHNPSAPR			0.0026	1347.69	3	12	1.1.1.997.11	Winner
0	99	LAALSDHNPSAPR			0.0026	1347.69	3	19	1.1.1.1002.8	Winner
0	99	LAALSDHNPSAPR			0.0026	1347.69	3	14	1.1.1.1007.3	Winner
0	99	LAALSDHNPSAPR			0.0022	1347.69	3	15	1.1.1.1014.8	Winner
0	90.5	LAALSDHNPSAPR			0.0002	1347.69	2	10	1.1.1.1013.19	Winner
0	72.6	LAALSDHNPSAPR			-0.0056	1347.68	3	9	1.1.1.1032.7	Winner
0	23.8	LAALSDHNPSAPR			-0.0122	1347.68	3	8	1.1.1.1062.5	Winner
0	< 1	LAALSDHNPSAPR			-0.0122	1347.68	3	6	1.1.1.1068.5	Winner
0	99	LGADEDSFVILEPETNR			0.0007	1903.92	2	13	1.1.1.1670.16	Winner
0	99	LGADEDSFVILEPETNR			0.0007	1903.92	2	21	1.1.1.1676.20	Winner
0	99	LGADEDSFVILEPETNR			-0.0019	1903.91	3	14	1.1.1.1681.10	Winner
0	99	LGADEDSFVILEPETNR			0.0007	1903.92	2	22	1.1.1.1681.21	Winner
0	99	LGADEDSFVILEPETNR			0.0007	1903.92	2	22	1.1.1.1686.21	Winner
0	99	LGADEDSFVILEPETNRELEALK		missed R-E@17	0.003	2587.3	3	15	1.1.1.1826.11	Winner
0	99	LKQLGVDVSIKPR		missed K-Q@2	-0.0031	1451.88	3	18	1.1.1.1212.6	Winner
0	99	LSEPSLPIEDSQDLYNASPEPK			-0.001	2428.16	3	29	1.1.1.1645.17	Winner
0	99	LSEPSLPIEDSQDLYNASPEPK			-0.001	2428.16	3	33	1.1.1.1650.17	Winner
0	99	LSEPSLPIEDSQDLYNASPEPK			-0.001	2428.16	3	34	1.1.1.1655.15	Winner
0	99	LSEPSLPIEDSQDLYNASPEPK			-0.0007	2428.16	2	22	1.1.1.1658.20	Winner
0	99	LSEPSLPIEDSQDLYNASPEPK			-0.001	2428.16	3	32	1.1.1.1661.16	Winner
0	99	LSEPSLPIEDSQDLYNASPEPK			-0.0007	2428.16	2	15	1.1.1.1662.21	Winner
0	99	LSEPSLPIEDSQDLYNASPEPK			-0.0007	2428.16	2	13	1.1.1.1663.21	Winner
0	99	MGYFPTEEK			-0.0013	1100.48	2	14	1.1.1.1243.11	Winner
0	99	MGYFPTEEK			-0.0013	1100.48	2	15	1.1.1.1248.9	Winner
0	99	MGYFPTEEK			-0.0013	1100.48	2	12	1.1.1.1254.13	Winner
0	91	MGYFPTEEK			-0.0014	1100.48	2	9	1.1.1.1260.14	Winner
0	< 1	MGYFPTEEK			-0.0004	1100.48	2	5	1.1.1.1237.11	Winner
0	99	MGYFPTEEKSETDENSGK		missed K-S@9	0.0009	2047.87	3	18	1.1.1.1158.16	Winner
0	99	MGYFPTEEKSETDENSGK		missed K-S@9	0.9993	2048.87	3	15	1.1.1.1161.16	Winner
0	99	NASRPMVIQESK			-0.0012	1358.7	2	12	1.1.1.912.19	Winner
0	99	NASRPMVIQESK			-0.0009	1358.7	3	15	1.1.1.916.4	Winner
0	49.8	NASRPMVIQESK			-0.0009	1358.7	3	9	1.1.1.923.6	Winner
0	< 1	NASRPMVIQESK			-0.0013	1358.7	3	6	1.1.1.910.7	Winner
0	99	NEELEIQEK			0.0005	1130.55	2	14	1.1.1.1047.18	Winner
0	99	NEELEIQEK			0.0005	1130.55	2	15	1.1.1.1052.17	Winner
0	95.5	NEELEIQEK			0.0066	1130.55	2	10	1.1.1.1077.15	Winner
0	43.4	NEELEIQEK			0.0005	1130.55	2	12	1.1.1.1063.15	Winner
0	8.7	NEELEIQEK			0.0139	1130.56	2	7	1.1.1.1085.17	Winner
0	99	NFVFHTLSPVK			0.0012	1287.7	3	13	1.1.1.1426.2	Winner
0	99	NFVFHTLSPVK			-0.0004	1287.7	2	15	1.1.1.1431.13	Winner
0	99	NFVFHTLSPVK			0.0012	1287.7	3	13	1.1.1.1432.2	Winner
0	99	NFVFHTLSPVK			-0.0011	1287.7	2	11	1.1.1.1444.12	Winner
0	96.9	NFVFHTLSPVK			0.0012	1287.7	3	11	1.1.1.1438.2	Winner
0	92.6	NFVFHTLSPVK			0.0012	1287.7	3	10	1.1.1.1420.2	Winner
0	13.1	NFVFHTLSPVK			0.0061	1287.7	2	7	1.1.1.1460.15	Winner
0	< 1	NFVFHTLSPVK			-0.0006	1287.7	3	4	1.1.1.1453.2	Winner
0	99	NFVFHTLSPVKAEAAK		missed K-A@11	-0.0009	1757.95	3	16	1.1.1.1335.11	Winner
0	99	NFVFHTLSPVKAEAAK		missed K-A@11	-0.0009	1757.95	3	14	1.1.1.1340.13	Winner
0	98.6	NFVFHTLSPVKAEAAK		missed K-A@11	-0.0001	1757.95	4	12	1.1.1.1339.5	Winner
0	83.2	NFVFHTLSPVKAEAAK		missed K-A@11	-0.0001	1757.95	4	10	1.1.1.1340.4	Winner
0	99	NIDDASQMDLFHR			-0.0001	1560.7	3	15	1.1.1.1430.5	Winner
0	99	NIDDASQMDLFHR			-0.0001	1560.7	3	13	1.1.1.1436.7	Winner
0	97.7	NIDDASQMDLFHR			-0.0015	1560.7	2	11	1.1.1.1424.19	Winner
0	85.2	NIDDASQMDLFHR			-0.0001	1560.7	3	10	1.1.1.1429.8	Winner
0	57.6	NPFEAIR		cleaved R-P@C-term	-0.0004	845.439	2	7	1.1.1.1212.3	Winner
0	19.2	NPFEAIR		cleaved R-P@C-term	-0.0004	845.439	2	6	1.1.1.1217.4	Winner
0	99	NPFEAIRPGSAQQVK			-0.0014	1640.86	2	21	1.1.1.1227.20	Winner
0	99	NPFEAIRPGSAQQVK			-0.0005	1640.86	3	14	1.1.1.1230.5	Winner
0	99	NPFEAIRPGSAQQVK			-0.0005	1640.86	3	15	1.1.1.1239.8	Winner
0	99	NPFEAIRPGSAQQVK			-0.0009	1640.86	3	14	1.1.1.1245.7	Winner
0	52	NPFEAIRPGSAQQVK			-0.0012	1640.86	3	9	1.1.1.1251.3	Winner
0	< 1	NPFEAIRPGSAQQVK			-0.0005	1640.86	3	7	1.1.1.1225.8	Winner
0	99	NQYQALKPR			-0.0008	1116.6	2	15	1.1.1.888.16	Winner
0	11.4	NQYQALKPR			-0.0008	1116.6	2	7	1.1.1.898.13	Winner
0	99	PMVIQESK		cleaved R-P@N-term	-0.0006	930.484	2	12	1.1.1.953.10	Winner
0	96.4	PMVIQESK		cleaved R-P@N-term	-0.0006	930.484	2	9	1.1.1.947.5	Winner
0	89.8	QLGVDVSIKPR			0	1210.7	3	10	1.1.1.1226.2	Winner
0	87.8	QLGVDVSIKPR			0	1210.7	3	9	1.1.1.1221.2	Winner
0	37.8	RFTLDR		missed R-F@1	0.0011	806.441	2	8	1.1.1.938.3	Winner
0	34.9	RFTLDR		missed R-F@1	0.0011	806.441	2	8	1.1.1.942.2	Winner
0	99	RGPSFMTSPSPK		missed R-G@1	0.0026	1290.64	3	14	1.1.1.1052.4	Winner
0	99	RGPSFMTSPSPK		missed R-G@1	0.0026	1290.64	3	11	1.1.1.1057.3	Winner
0	88.5	RGPSFMTSPSPK		missed R-G@1	0.0026	1290.64	3	10	1.1.1.1046.7	Winner
0	< 1	SFFPTAGGFR		cleaved T-S@N-term	0.0013	1085.53	2	7	1.1.1.1544.5	Winner
0	< 1	SGNSTDFTTDRK		cleaved Q-S@N-term; missed R-K@11	0.0107	1327.61	3	5	1.1.1.817.3	Winner
0	< 1	SIFKYLE		cleaved E-S@C-term; missed K-Y@4	0.0015	898.481	2	4	1.1.1.1442.6	Winner
0	< 1	SIFKYLE		cleaved E-S@C-term; missed K-Y@4	0.0015	898.481	2	4	1.1.1.1447.5	Winner
0	13.2	SLLRNPFEAIRPGSAQQVK		missed R-N@4	0.0019	2110.17	4	8	1.1.1.1487.11	Winner
0	< 1	SLLRNPFEAIRPGSAQQVK		missed R-N@4	0.0019	2110.17	4	7	1.1.1.1481.7	Winner
0	< 1	SLLRNPFEAIRPGSAQQVK		missed R-N@4	-0.0016	2110.16	3	6	1.1.1.1483.15	Winner
0	< 1	SLLRNPFEAIRPGSAQQVK		missed R-N@4	0.0019	2110.17	4	7	1.1.1.1492.9	Winner
0	99	SLSSDSTLLLFK			0.0155	1309.73	2	15	1.1.1.1704.11	Winner
0	99	SLSSDSTLLLFK			-0.0011	1309.71	2	16	1.1.1.1709.13	Winner
0	99	SLSSDSTLLLFK			-0.0014	1309.71	2	20	1.1.1.1719.12	Winner
0	99	SLSSDSTLLLFK			-0.0017	1309.71	2	21	1.1.1.1724.12	Winner
0	99	SLSSDSTLLLFK			-0.0017	1309.71	2	20	1.1.1.1729.11	Winner
0	99	SLSSDSTLLLFK			-0.0017	1309.71	2	19	1.1.1.1735.12	Winner
0	99	SLSSDSTLLLFK			-0.0014	1309.71	2	19	1.1.1.1740.10	Winner
0	99	SLSSDSTLLLFK			-0.0014	1309.71	2	18	1.1.1.1745.13	Winner
0	99	SLSSDSTLLLFK			-0.0014	1309.71	2	16	1.1.1.1750.12	Winner
0	99	SLSSDSTLLLFK			-0.0017	1309.71	2	17	1.1.1.1755.11	Winner
0	99	SLSSDSTLLLFK			-0.0118	1309.7	2	9	1.1.1.1775.10	Winner
0	46.3	SLSSDSTLLLFK			-0.0121	1309.7	2	14	1.1.1.1770.14	Winner
0	26.7	SLSSDSTLLLFK			0.0092	1309.72	2	7	1.1.1.1799.9	Winner
0	18.2	SLSSDSTLLLFK			-0.0121	1309.7	2	11	1.1.1.1765.11	Winner
0	< 1	SLSSDSTLLLFK			-0.0017	1309.71	2	3	1.1.1.1735.11	Winner
0	< 1	SLSSDSTLLLFK			-0.0121	1309.7	2	10	1.1.1.1760.16	Winner
0	99	SLYQENLEAQVK		cleaved K-P@C-term	0.0007	1420.72	2	13	1.1.1.1295.18	Winner
0	99	SPSPGLFR			0.0004	859.456	2	12	1.1.1.1157.5	Winner
0	99	SPSPGLFR			0.0004	859.456	2	12	1.1.1.1163.3	Winner
0	99	SPSPGLFR			0.0004	859.456	2	9	1.1.1.1179.2	Winner
0	98.6	SPSPGLFR			0.0004	859.456	2	10	1.1.1.1151.3	Winner
0	96.9	SPSPGLFR			0.0006	859.456	2	10	1.1.1.1174.3	Winner
0	80.9	SPSPGLFR			0.0022	859.457	2	7	1.1.1.1186.2	Winner
0	23.3	SPSPGLFR			0.0008	859.456	2	7	1.1.1.1181.3	Winner
0	< 1	SPSPGLFR			0.0002	859.455	2	5	1.1.1.1280.3	Winner
0	76.3	SRPMVIQESK		cleaved A-S@N-term	-0.0014	1173.62	2	9	1.1.1.915.16	Winner
0	99	SSAVGPPEK			-0.0018	870.443	2	10	1.1.1.795.6	Winner
0	94.8	SSAVGPPEK			-0.002	870.443	2	7	1.1.1.790.5	Winner
0	22.8	SSAVGPPEK			-0.0018	870.443	2	7	1.1.1.797.4	Winner
0	< 1	STPASSELNK		cleaved A-S@N-term	0.0197	1032.53	2	5	1.1.1.824.12	Winner
0	99	TDDSTSGLTR			0	1051.48	2	15	1.1.1.833.9	Winner
0	99	TDDSTSGLTR			-0.0014	1051.48	2	11	1.1.1.838.10	Winner
0	99	TDDSTSGLTR			0.0002	1051.48	2	11	1.1.1.844.10	Winner
0	99	TDDSTSGLTR			-0.0012	1051.48	2	9	1.1.1.855.9	Winner
0	99	TDDSTSGLTR			-0.0012	1051.48	2	10	1.1.1.861.13	Winner
0	92.2	TDDSTSGLTR			0	1051.48	2	9	1.1.1.831.16	Winner
0	99	TGSLLNQPK			0.0014	956.53	2	13	1.1.1.966.10	Winner
0	99	TGSLLNQPK			0.0014	956.53	2	14	1.1.1.972.8	Winner
0	99	TGSLLNQPK			0.0014	956.53	2	14	1.1.1.978.6	Winner
0	99	TGSLLNQPK			0.0014	956.53	2	12	1.1.1.984.5	Winner
0	99	TGSLLNQPK			0.001	956.53	2	12	1.1.1.989.10	Winner
0	99	TGSLLNQPK			-0.0006	956.529	2	11	1.1.1.994.8	Winner
0	99	TGSLLNQPK			0.0014	956.53	2	11	1.1.1.999.9	Winner
0	98.5	TGSLLNQPK			-0.002	956.527	2	10	1.1.1.1004.6	Winner
0	66.4	TGSLLNQPK			-0.0006	956.529	2	7	1.1.1.957.10	Winner
0	< 1	TGSLLNQPK			0.0356	956.565	2	7	1.1.1.1024.10	Winner
0	< 1	TGSLLNQPK			0.0356	956.565	2	6	1.1.1.1031.9	Winner
0	98.3	TIHDFFK			-0.0003	906.46	2	11	1.1.1.1204.6	Winner
0	98.3	TIHDFFK			-0.0003	906.46	2	11	1.1.1.1214.6	Winner
0	98.2	TIHDFFK			-0.0003	906.46	2	11	1.1.1.1209.8	Winner
0	96.7	TIHDFFK			-0.0003	906.46	2	10	1.1.1.1198.5	Winner
0	91.5	TIHDFFK			-0.0003	906.46	2	8	1.1.1.1238.4	Winner
0	72.2	TIHDFFK			0.002	906.462	2	8	1.1.1.1232.3	Winner
0	56.3	TIHDFFK			-0.0031	906.457	2	7	1.1.1.1244.4	Winner
0	13.1	TIHDFFK			0.0023	906.462	2	6	1.1.1.1267.6	Winner
0	< 1	TIHDFFK			0.0025	906.462	2	4	1.1.1.1260.5	Winner
0	33.1	TIHDFFKR		missed K-R@7	-0.0003	1062.56	2	8	1.1.1.1095.13	Winner
0	< 1	TIHDFFKR		missed K-R@7	-0.0006	1062.56	2	5	1.1.1.1111.11	Winner
0	< 1	TLDR		cleaved F-T@N-term	-0.0051	503.265	1	5	1.1.1.1039.10	Winner
0	99	TTYDSAEEENKENLYAGK		missed K-E@11	0.0017	2060.92	3	12	1.1.1.1089.19	Winner
0	99	TVADSDESYMEK			-0.0001	1373.57	2	19	1.1.1.1030.19	Winner
0	99	TVADSDESYMEK			-0.0001	1373.57	2	21	1.1.1.1035.19	Winner
0	99	TVADSDESYMEK			-0.0001	1373.57	2	17	1.1.1.1045.18	Winner
0	96.7	TVADSDESYMEK			0.0001	1373.57	2	10	1.1.1.1051.18	Winner
0	< 1	YLADGDLHSD		cleaved D-G@C-term	-0.0002	1104.47	2	8	1.1.1.1083.8	Winner
0	99	YLADGDLHSDGPGR			0.0008	1471.67	3	15	1.1.1.1036.10	Winner
0	99	YLADGDLHSDGPGR			0.0017	1471.67	3	15	1.1.1.1052.8	Winner
0	99	YLADGDLHSDGPGR			0.0017	1471.67	3	12	1.1.1.1053.7	Winner
0	99	YLADGDLHSDGPGR			0.0017	1471.67	3	18	1.1.1.1057.7	Winner
0	99	YLADGDLHSDGPGR			0.0017	1471.67	3	17	1.1.1.1058.9	Winner
0	99	YLADGDLHSDGPGR			0.0017	1471.67	3	18	1.1.1.1063.9	Winner
0	99	YLADGDLHSDGPGR			0.0014	1471.67	3	15	1.1.1.1069.15	Winner
0	99	YLADGDLHSDGPGR			0.0011	1471.67	3	12	1.1.1.1079.10	Winner
0	99	YLADGDLHSDGPGR			0.0008	1471.67	3	12	1.1.1.1085.12	Winner
0	99	YLADGDLHSDGPGR			0.0008	1471.67	3	12	1.1.1.1090.12	Winner
0	97.4	YLADGDLHSDGPGR			0.0008	1471.67	3	11	1.1.1.1046.13	Winner
0	31.1	YQALKPR		cleaved Q-Y@N-term	-0.0014	874.501	2	8	1.1.1.889.5	Winner
0	99	YQSSHHKEIIDTANTTEMNSDHHSK		missed K-E@7	-0.0035	2909.3	5	16	1.1.1.889.14	Winner
0	99	YQSSHHKEIIDTANTTEMNSDHHSK		missed K-E@7	-0.0021	2909.3	6	15	1.1.1.891.11	Winner
1.68	99	LGADEDSFVILEPETNRGEK		missed R-G@17	0.0023	2218.08	3	14	1.1.1.1553.15	Other
