# Supplementary material for: Cdc7 activates replication checkpoint by phosphorylating the Chk1-binding domain of Claspin in human cells
Source: eLife. 2019 Dec 31;8:e50796. doi: 10.7554/eLife.50796 (PMC6996922; doi:10.7554/eLife.50796)
Supplement: Figure 4—source data 2. [file elife-50796-fig4-data2.xlsx]

## Sheet: -
Contrib	Conf	Sequence	Modifications	Cleavages	∆Mass	Prec MW	z	Sc	Spectrum	Type
2	99	NQEDDVEQPFNDSG	Amidated@C-term	cleaved G-C@C-term	-0.0016	1591.64	2	18	1.1.1.1354.8	Winner
2	99	SETDENSGKQPSKLDEDDS	Amidated@C-term	cleaved S-C@C-term; missed K-Q@9; missed K-L@13	0.0031	2078.89	3	17	1.1.1.944.4	Winner
0	99	NQEDDVEQPFNDSG	Amidated@C-term	cleaved G-C@C-term	-0.0016	1591.64	2	16	1.1.1.1344.6	Winner
0	99	NQEDDVEQPFNDSG	Amidated@C-term	cleaved G-C@C-term	-0.0016	1591.64	2	16	1.1.1.1349.8	Winner
0	8.9	GSEQTTGAENEVETNALPVVSK	Carbamyl@N-term; Deamidated(N)@10		-0.0216	2303.05	3	9	1.1.1.1521.5	Winner
0	99	ETQIITGSDESCR	Carboxy(E)@10; Dioxidation(C)@12		0.0188	1513.64	2	14	1.1.1.1238.8	Winner
0	12.1	GSEQTTGAENEVETNALPVVSK	Carboxy(E)@11		-0.0216	2303.05	3	11	1.1.1.1515.3	Winner
0	99	GSEQTTGAENEVETNALPVVSK	Cation:K(E)@11		-0.0075	2297.04	4	13	1.1.1.1515.2	Winner
0	99	GSEQTTGAENEVETNALPVVSK	Cation:K(E)@9		-0.0075	2297.04	4	13	1.1.1.1521.3	Winner
2	99	LSEPSLPIEDSQDLYNASPEPK	Cation:Na(D)@13		-0.0062	2450.14	3	19	1.1.1.1963.4	Winner
0	99	LSEPSLPIEDSQDLYNASPEPK	Cation:Na(D)@13		-0.0059	2450.14	3	24	1.1.1.1975.3	Winner
0	79.1	LAALSDHNPSAPR	Cation:Na(D)@6		0.0023	1369.67	3	11	1.1.1.1126.4	Winner
2	99	GSEQTTGAENEVETNALPVVSK	Cation:Na(E)@9		0.002	2281.07	3	26	1.1.1.1522.3	Winner
0	99	GSEQTTGAENEVETNALPVVSK	Cation:Na(E)@9		0.002	2281.07	3	28	1.1.1.1511.2	Winner
0	99	GSEQTTGAENEVETNALPVVSK	Cation:Na(E)@9		0.002	2281.07	3	31	1.1.1.1516.3	Winner
0	99	LSEPSLPIEDSQDLYNASPEPK	Cation:Na(E)@9		-0.0059	2450.14	3	25	1.1.1.1969.4	Winner
0	99	ESALNLPYHMPENK	Chloro(Y)@8		0.0108	1675.75	2	11	1.1.1.1412.6	Winner
2	99	ETQIITGSDESCR	Cys->Dha(C)@12		-0.0005	1403.65	2	13	1.1.1.1127.15	Winner
2	99	ETQIITGSDESCRK	Cys->Dha(C)@12	missed R-K@13	0.0012	1531.75	3	16	1.1.1.1038.3	Winner
0	99	ETQIITGSDESCR	Cys->Dha(C)@12		-0.0004	1403.65	2	17	1.1.1.1133.12	Winner
0	99	ETQIITGSDESCR	Cys->Dha(C)@12		-0.0004	1403.65	2	18	1.1.1.1139.14	Winner
0	99	ETQIITGSDESCR	Cys->Dha(C)@12		-0.0004	1403.65	2	16	1.1.1.1144.9	Winner
0	99	ETQIITGSDESCRK	Cys->Dha(C)@12	missed R-K@13	0.0012	1531.75	3	15	1.1.1.1032.4	Winner
0	99	ETQIITGSDESCRK	Cys->Dha(C)@12	missed R-K@13	0.0012	1531.75	3	14	1.1.1.1033.3	Winner
0	99	ETQIITGSDESCRK	Cys->Dha(C)@12	missed R-K@13	0.0012	1531.75	3	13	1.1.1.1043.5	Winner
0	94.4	ETQIITGSDESCRK	Cys->Dha(C)@12	missed R-K@13	0.0015	1531.75	3	9	1.1.1.1048.9	Winner
0	99	LDEDDSCSLLTK	Cys->Dha(C)@7		0.0007	1303.62	2	14	1.1.1.1382.4	Winner
0	99	NASRPMVIQESK	Deamidated(N)@1		-0.0005	1359.68	3	14	1.1.1.1140.3	Winner
0	99	NASRPMVIQESK	Deamidated(N)@1		-0.0005	1359.68	3	13	1.1.1.1145.3	Winner
0	99	NASRPMVIQESK	Deamidated(N)@1		-0.0005	1359.68	3	10	1.1.1.1150.3	Winner
0	99	NEELEIQEK	Deamidated(N)@1		0.0007	1131.53	2	12	1.1.1.1211.7	Winner
0	99	NEELEIQEK	Deamidated(N)@1		0.0007	1131.53	2	10	1.1.1.1245.10	Winner
0	99	NEELEIQEK	Deamidated(N)@1		0.0007	1131.53	2	14	1.1.1.1250.9	Winner
0	99	NEELEIQEK	Deamidated(N)@1		0.0007	1131.53	2	12	1.1.1.1256.6	Winner
0	99	NQYQALKPR	Deamidated(N)@1		0.001	1117.59	2	10	1.1.1.1054.7	Winner
0	99	NQYQALKPR	Deamidated(N)@1		0.0008	1117.59	2	9	1.1.1.1064.7	Winner
0	99	NQYQALKPR	Deamidated(N)@1		0.0008	1117.59	2	11	1.1.1.1069.8	Winner
0	99	NQYQALKPR	Deamidated(N)@1		-0.0011	1117.59	2	10	1.1.1.1112.4	Winner
0	99	NQYQALKPR	Deamidated(N)@1		-0.0014	1117.59	2	13	1.1.1.1117.10	Winner
0	99	NQYQALKPR	Deamidated(N)@1		-0.0014	1117.59	2	13	1.1.1.1123.7	Winner
0	99	NQYQALKPR	Deamidated(N)@1		-0.0014	1117.59	2	12	1.1.1.1129.8	Winner
0	98.9	NQYQALKPR	Deamidated(N)@1		0.0008	1117.59	2	8	1.1.1.1074.6	Winner
0	98.5	NQYQALKPR	Deamidated(N)@1		0.001	1117.59	2	11	1.1.1.1044.5	Winner
0	90.4	NASRPMVIQESK	Deamidated(N)@1		-0.0005	1359.68	3	10	1.1.1.1101.3	Winner
0	90.2	NASRPMVIQESK	Deamidated(N)@1		-0.0005	1359.68	3	10	1.1.1.1107.4	Winner
0	99	NASRPMVIQESK	Deamidated(N)@1; Deamidated(R)@4; Oxidation(P)@5; Oxidation(M)@6		0.012	1392.67	2	11	1.1.1.1050.10	Winner
0	98.8	NASRPMVIQESK	Deamidated(N)@1; Deamidated(R)@4; Oxidation(P)@5; Oxidation(M)@6		0.012	1392.67	2	10	1.1.1.1040.8	Winner
0	31.1	NASRPMVIQESK	Deamidated(N)@1; Deamidated(R)@4; Oxidation(P)@5; Oxidation(M)@6		0.012	1392.67	2	10	1.1.1.1045.10	Winner
0	99	NASRPMVIQESK	Deamidated(N)@1; Oxidation(M)@6		0.0004	1375.68	3	16	1.1.1.1010.5	Winner
0	99	NASRPMVIQESK	Deamidated(N)@1; Oxidation(M)@6		0.0004	1375.68	3	13	1.1.1.1016.6	Winner
0	99	NASRPMVIQESK	Deamidated(N)@1; Oxidation(M)@6		0.0008	1375.68	3	13	1.1.1.1034.7	Winner
0	99	NASRPMVIQESK	Deamidated(N)@1; Oxidation(M)@6		0.0008	1375.68	3	17	1.1.1.1040.4	Winner
0	99	NASRPMVIQESK	Deamidated(N)@1; Oxidation(M)@6		0.0008	1375.68	3	16	1.1.1.1045.5	Winner
0	99	NASRPMVIQESK	Deamidated(N)@1; Oxidation(M)@6		0.0008	1375.68	3	15	1.1.1.1050.3	Winner
0	62.3	NASRPMVIQESK	Deamidated(N)@1; Oxidation(M)@6		0.0004	1375.68	3	8	1.1.1.1022.7	Winner
0	99	NASRPMVIQESK	Deamidated(N)@1; Oxidation(M)@6; Deamidated(Q)@9		0.0076	1376.67	3	13	1.1.1.1064.4	Winner
0	98.1	NASRPMVIQESK	Deamidated(N)@1; Oxidation(P)@5; Oxidation(M)@6		0.0013	1391.67	3	10	1.1.1.1071.3	Winner
0	99	GSEQTTGAENEVETNALPVVSK	Deamidated(N)@10		-0.0011	2260.07	3	27	1.1.1.1442.4	Winner
0	99	GSEQTTGAENEVETNALPVVSK	Deamidated(N)@10		-0.0011	2260.07	3	27	1.1.1.1453.4	Winner
0	99	EIIDTANTTEMNSDHHSK	Deamidated(N)@12		0.0017	2042.89	3	14	1.1.1.1148.7	Winner
0	98.8	EIIDTANTTEMNSDHHSK	Deamidated(N)@12		0.0021	2042.89	4	10	1.1.1.1162.7	Winner
0	98.5	EIIDTANTTEMNSDHHSK	Deamidated(N)@12		0.0021	2042.89	4	12	1.1.1.1157.4	Winner
0	82.1	EIIDTANTTEMNSDHHSK	Deamidated(N)@12		0.0033	2042.89	4	10	1.1.1.1146.5	Winner
0	99	FTSQDASTPASSELNKQEK	Deamidated(N)@15	missed K-Q@16	0.0007	2067.96	3	16	1.1.1.1141.14	Winner
0	99	FTSQDASTPASSELNKQEK	Deamidated(N)@15	missed K-Q@16	0.0007	2067.96	3	17	1.1.1.1147.12	Winner
0	99	FTSQDASTPASSELNKQEK	Deamidated(N)@15	missed K-Q@16	-0.0004	2067.96	3	21	1.1.1.1198.10	Winner
0	99	FTSQDASTPASSELNKQEK	Deamidated(N)@15	missed K-Q@16	-0.0004	2067.96	3	20	1.1.1.1203.11	Winner
0	99	FTSQDASTPASSELNKQEK	Deamidated(N)@15	missed K-Q@16	-0.0004	2067.96	3	17	1.1.1.1211.9	Winner
0	99	GSEQTTGAENEVETNALPVVSK	Deamidated(N)@15		-0.0016	2260.07	3	25	1.1.1.1460.5	Winner
0	99	GSEQTTGAENEVETNALPVVSK	Deamidated(N)@15		-0.0016	2260.07	3	30	1.1.1.1465.3	Winner
0	99	GSEQTTGAENEVETNALPVVSK	Deamidated(N)@15		-0.0016	2260.07	3	29	1.1.1.1470.4	Winner
0	99	GSEQTTGAENEVETNALPVVSK	Deamidated(N)@15		-0.002	2260.07	3	25	1.1.1.1475.4	Winner
0	99	GSEQTTGAENEVETNALPVVSK	Deamidated(N)@15		0.0041	2260.07	3	24	1.1.1.1548.5	Winner
0	99	GSEQTTGAENEVETNALPVVSK	Deamidated(N)@15		0.0041	2260.07	3	29	1.1.1.1554.4	Winner
0	99	GSEQTTGAENEVETNALPVVSK	Deamidated(N)@15		0.0041	2260.07	3	20	1.1.1.1563.6	Winner
0	99	LSEPSLPIEDSQDLYNASPEPK	Deamidated(N)@16		-0.0001	2429.15	3	27	1.1.1.1941.3	Winner
0	99	LSEPSLPIEDSQDLYNASPEPK	Deamidated(N)@16		0.0002	2429.15	3	25	1.1.1.2010.3	Winner
0	< 1	ALEGEGPQNPEETDEKVEEPEQQNK	Deamidated(N)@24	cleaved H-A@N-term; missed K-V@16	0.0064	2824.26	3	5	1.1.1.1250.12	Winner
0	99	DLVKNEELEIQEK	Deamidated(N)@5	missed K-N@4	-0.002	1586.8	3	10	1.1.1.1389.6	Winner
0	99	DLVKNEELEIQEK	Deamidated(N)@5	missed K-N@4	-0.002	1586.8	3	13	1.1.1.1395.7	Winner
0	99	DLVKNEELEIQEK	Deamidated(N)@5	missed K-N@4	0.0023	1586.81	3	16	1.1.1.1486.3	Winner
0	90.9	DLVKNEELEIQEK	Deamidated(N)@5	missed K-N@4	-0.002	1586.8	3	11	1.1.1.1402.4	Winner
0	45	DLVKNEELEIQEK	Deamidated(N)@5; Deamidated(Q)@11	missed K-N@4	0.0363	1587.82	3	10	1.1.1.1423.2	Winner
0	53.8	ESALNLPYHMPENK	Deamidated(N)@5; Oxidation(M)@10		0.0022	1658.76	3	10	1.1.1.1393.2	Winner
0	21	ESALNLPYHMPENK	Deamidated(N)@5; Oxidation(M)@10		0.0025	1658.76	3	9	1.1.1.1383.4	Winner
0	99	TGSLLNQPK	Deamidated(N)@6		0.0014	957.515	2	12	1.1.1.1131.5	Winner
0	99	TGSLLNQPK	Deamidated(N)@6		0.001	957.514	2	12	1.1.1.1137.5	Winner
0	99	TGSLLNQPK	Deamidated(N)@6		0.001	957.514	2	10	1.1.1.1162.6	Winner
0	91.9	EMDKENNDGSSEIGK	Deamidated(N)@7	missed K-E@4	0.0057	1652.69	3	11	1.1.1.957.5	Winner
0	99	LAALSDHNPSAPR	Deamidated(N)@8		0.0038	1348.68	3	13	1.1.1.1156.4	Winner
0	99	DLVKNEELEIQEK	Deamidated(Q)@11	missed K-N@4	0.0019	1586.81	3	15	1.1.1.1480.2	Winner
0	99	NPFEAIRPGSAQQVK	Deamidated(Q)@13		-0.0001	1641.85	3	13	1.1.1.1395.8	Winner
0	90.4	NPFEAIRPGSAQQVK	Deamidated(Q)@13		-0.0001	1641.85	3	11	1.1.1.1405.4	Winner
0	20.5	NPFEAIRPGSAQQVK	Deamidated(Q)@13		-0.0001	1641.85	3	9	1.1.1.1389.8	Winner
0	83.7	ETQIITGSDESCRK	Deamidated(Q)@3; Cys->Dha(C)@12	missed R-K@13	0.0006	1532.73	3	10	1.1.1.1060.5	Winner
0	99	ETQIITGSDESCRK	Deamidated(Q)@3; Propionamide(C)@12	missed R-K@13	0.0059	1637.76	3	11	1.1.1.1069.7	Winner
0	99	FTSQDASTPASSELNKQEK	Deamidated(Q)@4	missed K-Q@16	-0.0004	2067.96	3	17	1.1.1.1192.7	Winner
0	99	GSEQTTGAENEVETNALPVVSK	Deamidated(Q)@4		0.0097	2260.08	3	30	1.1.1.1537.4	Winner
0	99	NQYQALKPR	Deamidated(Q)@4		0.001	1117.59	2	14	1.1.1.1049.7	Winner
0	65.3	NQYQALKPR	Deamidated(Q)@4		0.001	1117.59	2	8	1.1.1.1059.8	Winner
0.25	84.4	EALKQLHSETQR	Deamidated(Q)@5	missed K-Q@4	0.0005	1439.74	3	8	1.1.1.1011.6	Winner
2	99	TGSLLNQPK	Deamidated(Q)@7		0.0182	957.531	2	13	1.1.1.1088.3	Winner
0	99	NEELEIQEK	Deamidated(Q)@7		0.0007	1131.53	2	13	1.1.1.1206.8	Winner
0	99	TGSLLNQPK	Deamidated(Q)@7		0.001	957.514	2	14	1.1.1.1142.6	Winner
0	99	TGSLLNQPK	Deamidated(Q)@7		0.001	957.514	2	12	1.1.1.1147.6	Winner
0	99	TGSLLNQPK	Deamidated(Q)@7		0.001	957.514	2	14	1.1.1.1152.4	Winner
0	99	TGSLLNQPK	Deamidated(Q)@7		0.0013	957.514	2	14	1.1.1.1157.3	Winner
0.35	89.6	ELEALKQR	Deamidated(Q)@7	missed K-Q@6	-0.0008	986.539	2	8	1.1.1.1059.6	Winner
0	56.6	NEELEIQEK	Deamidated(Q)@7		0.0007	1131.53	2	9	1.1.1.1216.6	Winner
0	31.6	ELEALKQR	Deamidated(Q)@7	missed K-Q@6	-0.0008	986.539	2	7	1.1.1.1064.6	Winner
0	30.4	NASRPMVIQESK	Deamidated(Q)@9		0.0001	1359.68	3	8	1.1.1.1066.3	Winner
0	20.1	LAALSDHN	Dehydrated(D)@6	cleaved N-P@C-term	0.0007	821.404	2	6	1.1.1.1024.2	Winner
0	60	TGSLLNQPK	Dehydrated(S)@3		-0.002	938.517	2	6	1.1.1.1084.4	Winner
0	4.8	FTSQAEK	Delta:H(4)C(2)(K)@7		0.0012	837.424	2	8	1.1.1.976.2	Winner
0	99	SSAVGPPEK	Delta:H(4)C(2)(K)@9		0.001	898.477	2	10	1.1.1.1065.5	Winner
0	99	SSAVGPPEK	Delta:H(4)C(2)(K)@9		0.001	898.477	2	11	1.1.1.1070.3	Winner
0	94.4	SSAVGPPEK	Delta:H(4)C(2)(K)@9		0.001	898.477	2	10	1.1.1.1075.4	Winner
0	94.4	SSAVGPPEK	Delta:H(4)C(2)(K)@9		-0.0006	898.476	2	8	1.1.1.1081.3	Winner
0.46	99	VEEPEQQNK	Delta:H(4)C(2)@N-term		-0.0008	1127.55	2	14	1.1.1.944.3	Winner
0	99	VEEPEQQNK	Delta:H(4)C(2)@N-term		-0.0008	1127.55	2	12	1.1.1.950.4	Winner
0	92.6	VEEPEQQNK	Delta:H(4)C(2)@N-term		-0.0008	1127.55	2	9	1.1.1.938.6	Winner
0	99	PTCHGNAMALLK	Delta:H(4)C(2)@N-term; Trioxidation(C)@3; Oxidation(M)@8	cleaved R-P@N-term	-0.0175	1346.61	3	14	1.1.1.1167.4	Winner
0	3.6	ETQIITGSDESCRK	Dioxidation(C)@12	missed R-K@13	0	1597.73	3	9	1.1.1.1073.10	Winner
1.89	99	MGYFPTEEK	Dioxidation(M)@1		-0.0004	1132.47	2	11	1.1.1.1302.8	Winner
0	99	MGYFPTEEK	Dioxidation(M)@1		0.0014	1132.48	2	12	1.1.1.1284.6	Winner
0	99	MGYFPTEEK	Dioxidation(M)@1		-0.0004	1132.47	2	11	1.1.1.1290.9	Winner
0	99	MGYFPTEEK	Dioxidation(M)@1		-0.0004	1132.47	2	11	1.1.1.1296.7	Winner
0	99	MGYFPTEEK	Dioxidation(M)@1		-0.0004	1132.47	2	10	1.1.1.1308.5	Winner
2	99	TVADSDESYMEK	Dioxidation(M)@10		-0.0011	1405.55	2	20	1.1.1.1021.6	Winner
0	99	ESALNLPYHMPENK	Dioxidation(M)@10		-0.0014	1673.77	3	11	1.1.1.1384.7	Winner
0	99	ESALNLPYHMPENK	Dioxidation(M)@10		-0.0014	1673.77	3	12	1.1.1.1389.10	Winner
0	99	TVADSDESYMEK	Dioxidation(M)@10		-0.0011	1405.55	2	13	1.1.1.1009.9	Winner
0	99	TVADSDESYMEK	Dioxidation(M)@10		-0.0011	1405.55	2	20	1.1.1.1015.5	Winner
0	99	TVADSDESYMEK	Dioxidation(M)@10		-0.0016	1405.55	2	10	1.1.1.1029.8	Winner
0	52.5	ESALNLPYHMPENK	Dioxidation(M)@10		-0.0014	1673.77	3	9	1.1.1.1395.10	Winner
2	99	EIIDTANTTEMNSDHHSK	Dioxidation(M)@11		-0.0021	2073.89	4	16	1.1.1.1048.10	Winner
0	99	EIIDTANTTEMNSDHHSK	Dioxidation(M)@11		-0.0021	2073.89	4	12	1.1.1.1043.7	Winner
0	99	EIIDTANTTEMNSDHHSK	Dioxidation(M)@11		0.0003	2073.89	3	15	1.1.1.1043.10	Winner
0	99	EIIDTANTTEMNSDHHSK	Dioxidation(M)@11		-0.0021	2073.89	4	12	1.1.1.1053.9	Winner
2	99	DMGTDGKEELKADVVPVTLAPK	Dioxidation(M)@2	missed K-E@7; missed K-A@11	0.0031	2344.19	4	19	1.1.1.1562.2	Winner
1.85	99	EMDKENNDGSSEIGK	Dioxidation(M)@2	missed K-E@4	-0.0036	1683.69	3	14	1.1.1.872.2	Winner
1.47	99	DMGTDGKEELK	Dioxidation(M)@2	missed K-E@7	0.0005	1253.54	3	12	1.1.1.890.2	Winner
0	99	DMGTDGKEELKADVVPVTLAPK	Dioxidation(M)@2	missed K-E@7; missed K-A@11	0.0031	2344.19	4	22	1.1.1.1553.3	Winner
0	99	PMVIQESK	Dioxidation(M)@2	cleaved R-P@N-term	-0.008	962.466	2	10	1.1.1.970.5	Winner
0	8.9	PMVIQESK	Dioxidation(M)@2	cleaved R-P@N-term	-0.008	962.466	2	7	1.1.1.964.5	Winner
1.92	99	GPSFMTSPSPK	Dioxidation(M)@5		-0.0001	1166.53	2	13	1.1.1.1126.7	Winner
0	99	DEKEMDKENNDGSSEIGK	Dioxidation(M)@5	missed K-E@3; missed K-E@7	-0.0032	2055.85	4	12	1.1.1.886.5	Winner
0	99	GPSFMTSPSPK	Dioxidation(M)@5		-0.0001	1166.53	2	11	1.1.1.1137.8	Winner
0	99	GPSFMTSPSPK	Dioxidation(M)@5		-0.0001	1166.53	2	12	1.1.1.1138.9	Winner
0	97.5	GPSFMTSPSPK	Dioxidation(M)@5		-0.0001	1166.53	2	10	1.1.1.1130.8	Winner
2	99	RGPSFMTSPSPK	Dioxidation(M)@6	missed R-G@1	0.0021	1322.63	3	11	1.1.1.1061.5	Winner
0	99	NASRPMVIQESK	Dioxidation(M)@6		0.0029	1390.69	3	12	1.1.1.977.3	Winner
0	99	NASRPMVIQESK	Dioxidation(M)@6		0.0029	1390.69	3	13	1.1.1.983.4	Winner
0	99	RGPSFMTSPSPK	Dioxidation(M)@6	missed R-G@1	0.0018	1322.63	3	12	1.1.1.1056.5	Winner
0.38	99	PMVIQESK	Formyl@N-term	cleaved R-P@N-term	0.0006	958.48	2	12	1.1.1.984.5	Winner
0	99	PMVIQESK	Formyl@N-term	cleaved R-P@N-term	0.0008	958.48	2	11	1.1.1.972.3	Winner
0	87.4	PMVIQESK	Formyl@N-term	cleaved R-P@N-term	0.0006	958.48	2	10	1.1.1.978.3	Winner
0	99	PTCHGNAMALLK	Formyl@N-term; Dioxidation(C)@3; Oxidation(M)@8	cleaved R-P@N-term	-0.0007	1330.6	2	14	1.1.1.1198.9	Winner
0	99	PTCHGNAMALLK	Formyl@N-term; Dioxidation(C)@3; Oxidation(M)@8	cleaved R-P@N-term	-0.0007	1330.6	2	17	1.1.1.1203.10	Winner
0	99	PTCHGNAMALLK	Formyl@N-term; Dioxidation(C)@3; Oxidation(M)@8	cleaved R-P@N-term	-0.0007	1330.6	2	12	1.1.1.1208.11	Winner
2	99	QLGVDVSIKPR	Gln->pyro-Glu@N-term		0.0005	1193.68	2	15	1.1.1.1582.3	Winner
2	99	QSDIRPSPGDSSVLQQ	Gln->pyro-Glu@N-term	cleaved Q-E@C-term	0.0023	1695.81	2	19	1.1.1.1458.3	Winner
0.72	99	QYQALKPR	Gln->pyro-Glu@N-term	cleaved N-Q@N-term	-0.0019	985.533	2	9	1.1.1.1235.4	Winner
0	99	QLGVDVSIKPR	Gln->pyro-Glu@N-term		0.0006	1193.68	2	13	1.1.1.1564.4	Winner
0	99	QLGVDVSIKPR	Gln->pyro-Glu@N-term		0.0006	1193.68	2	16	1.1.1.1570.4	Winner
0	99	QLGVDVSIKPR	Gln->pyro-Glu@N-term		0.0006	1193.68	2	16	1.1.1.1576.3	Winner
0	99	QLHSETQR	Gln->pyro-Glu@N-term		0.0001	980.468	2	12	1.1.1.905.3	Winner
0	99	QLHSETQR	Gln->pyro-Glu@N-term		-0.0001	980.467	2	12	1.1.1.911.3	Winner
0	99	QLHSETQR	Gln->pyro-Glu@N-term		-0.0001	980.467	2	12	1.1.1.917.4	Winner
0	99	QLHSETQR	Gln->pyro-Glu@N-term		-0.0001	980.467	2	10	1.1.1.923.4	Winner
0	99	QYQALKPR	Gln->pyro-Glu@N-term	cleaved N-Q@N-term	0.0033	985.538	2	10	1.1.1.1010.6	Winner
0	97.5	QYQALKPR	Gln->pyro-Glu@N-term	cleaved N-Q@N-term	0.0031	985.538	2	7	1.1.1.1004.7	Winner
0	89.6	QLHSETQR	Gln->pyro-Glu@N-term		0.0001	980.468	2	9	1.1.1.929.3	Winner
0	86.8	QLHSETQR	Gln->pyro-Glu@N-term		-0.0018	980.466	2	8	1.1.1.935.6	Winner
1.82	99	QLHSETQR	Gln->pyro-Glu@N-term; Deamidated(Q)@7		0.0177	981.469	2	12	1.1.1.910.3	Winner
0.1	98.3	EAIRPGSAQQVK	Glu->pyro-Glu@N-term	cleaved F-E@N-term	-0.0008	1264.69	2	8	1.1.1.1099.7	Winner
2	99	ESALNLPYHMPENK	Glu->pyro-Glu@N-term; Oxidation(M)@10		0.0021	1639.77	2	17	1.1.1.1503.3	Winner
0	99	ESALNLPYHMPENK	Glu->pyro-Glu@N-term; Oxidation(M)@10		0.0021	1639.77	2	16	1.1.1.1512.3	Winner
0	99	ESALNLPYHMPENK	Glu->pyro-Glu@N-term; Oxidation(M)@10		0.0021	1639.77	2	11	1.1.1.1517.5	Winner
0	99	EIIDTANTTEMNSDHHSK	Glu->pyro-Glu@N-term; Oxidation(M)@11		0.0001	2039.89	3	14	1.1.1.1182.8	Winner
0	99	EIIDTANTTEMNSDHHSK	Glu->pyro-Glu@N-term; Oxidation(M)@11		0.0001	2039.89	3	12	1.1.1.1188.11	Winner
0	99	EMDKENNDGSSEIGK	Glu->pyro-Glu@N-term; Oxidation(M)@2	missed K-E@4	-0.0008	1649.68	2	10	1.1.1.956.7	Winner
0	99	NEELEIQEK	Hydroxymethyl(N)@1; Dehydrated(E)@2		0.0018	1142.55	2	12	1.1.1.1283.7	Winner
2	99	MGYFPTEEKSETDENSGKQPSK	Oxidation(M)@1	missed K-S@9; missed K-Q@18	-0.0043	2504.1	4	12	1.1.1.1152.6	Winner
0	99	MGYFPTEEK	Oxidation(M)@1		0.0009	1116.48	2	12	1.1.1.1248.6	Winner
0	99	MGYFPTEEK	Oxidation(M)@1		0.0009	1116.48	2	13	1.1.1.1254.5	Winner
0	99	MGYFPTEEK	Oxidation(M)@1		-0.0007	1116.48	2	13	1.1.1.1260.5	Winner
0	99	MGYFPTEEK	Oxidation(M)@1		-0.0007	1116.48	2	14	1.1.1.1266.5	Winner
0	99	MGYFPTEEK	Oxidation(M)@1		-0.0007	1116.48	2	13	1.1.1.1272.5	Winner
0	99	MGYFPTEEK	Oxidation(M)@1		-0.0009	1116.48	2	13	1.1.1.1278.5	Winner
0	99	MGYFPTEEK	Oxidation(M)@1		0.0009	1116.48	2	12	1.1.1.1284.5	Winner
0	99	MGYFPTEEK	Oxidation(M)@1		-0.0012	1116.48	2	10	1.1.1.1290.8	Winner
0	99	MGYFPTEEK	Oxidation(M)@1		0.0013	1116.48	2	10	1.1.1.1296.6	Winner
0	99	MGYFPTEEK	Oxidation(M)@1		-0.0007	1116.48	2	9	1.1.1.1302.7	Winner
0	99	MGYFPTEEK	Oxidation(M)@1		-0.0013	1116.48	2	11	1.1.1.1308.4	Winner
0	99	MGYFPTEEKSETDENSGK	Oxidation(M)@1	missed K-S@9	-0.0005	2063.86	3	20	1.1.1.1193.4	Winner
0	99	MGYFPTEEKSETDENSGK	Oxidation(M)@1	missed K-S@9	-0.0003	2063.86	3	21	1.1.1.1199.5	Winner
0	99	MGYFPTEEKSETDENSGK	Oxidation(M)@1	missed K-S@9	-0.0003	2063.86	3	23	1.1.1.1204.9	Winner
0	99	MGYFPTEEKSETDENSGK	Oxidation(M)@1	missed K-S@9	-0.0003	2063.86	3	22	1.1.1.1209.10	Winner
0	99	MGYFPTEEKSETDENSGK	Oxidation(M)@1	missed K-S@9	-0.0003	2063.86	3	13	1.1.1.1215.8	Winner
0	99	MGYFPTEEKSETDENSGKQPSK	Oxidation(M)@1	missed K-S@9; missed K-Q@18	-0.0043	2504.1	4	12	1.1.1.1147.10	Winner
0	97	MGYFPTEEK	Oxidation(M)@1		-0.0018	1116.48	2	10	1.1.1.1314.3	Winner
0	96.8	MGYFPTEEKSETDENSGKQPSK	Oxidation(M)@1	missed K-S@9; missed K-Q@18	-0.0043	2504.1	4	11	1.1.1.1142.10	Winner
0	92.1	MGYFPTEEK	Oxidation(M)@1		-0.0015	1116.48	2	8	1.1.1.1325.6	Winner
0	90.4	MGYFPTEEK	Oxidation(M)@1		0.001	1116.48	2	9	1.1.1.1320.2	Winner
0	84.6	MGYFPTEEK	Oxidation(M)@1		0.0013	1116.48	2	9	1.1.1.1337.3	Winner
0	26.9	MGYFPTEEK	Oxidation(M)@1		-0.0015	1116.48	2	7	1.1.1.1369.7	Winner
0	11.6	MGYFPTEEK	Oxidation(M)@1		0.0016	1116.48	2	7	1.1.1.1360.6	Winner
0	67.1	MGYFPTEEK	Oxidation(M)@1; Delta:H(4)C(2)(K)@9		0	1144.51	2	10	1.1.1.1460.4	Winner
0	8.9	MGYFPTEEK	Oxidation(M)@1; Oxidation(Y)@3		0.0014	1132.48	2	7	1.1.1.1110.8	Winner
0	99	ESALNLPYHMPENK	Oxidation(M)@10		-0.0007	1657.78	3	12	1.1.1.1345.5	Winner
0	99	ESALNLPYHMPENK	Oxidation(M)@10		-0.0011	1657.78	3	16	1.1.1.1350.7	Winner
0	99	ESALNLPYHMPENK	Oxidation(M)@10		-0.0011	1657.78	3	18	1.1.1.1355.5	Winner
0	99	ESALNLPYHMPENK	Oxidation(M)@10		-0.0011	1657.78	3	15	1.1.1.1360.5	Winner
0	99	ESALNLPYHMPENK	Oxidation(M)@10		-0.0011	1657.78	3	16	1.1.1.1366.7	Winner
0	99	ESALNLPYHMPENK	Oxidation(M)@10		-0.0011	1657.78	3	13	1.1.1.1372.7	Winner
0	99	ESALNLPYHMPENK	Oxidation(M)@10		-0.0011	1657.78	3	13	1.1.1.1378.3	Winner
0	99	TVADSDESYMEK	Oxidation(M)@10		0.0009	1389.56	2	14	1.1.1.972.5	Winner
0	99	TVADSDESYMEK	Oxidation(M)@10		0.0009	1389.56	2	14	1.1.1.978.7	Winner
0	99	TVADSDESYMEK	Oxidation(M)@10		0.0009	1389.56	2	13	1.1.1.984.8	Winner
0	99	TVADSDESYMEK	Oxidation(M)@10		0.0008	1389.56	2	20	1.1.1.990.10	Winner
0	99	TVADSDESYMEK	Oxidation(M)@10		0.0005	1389.56	2	21	1.1.1.995.14	Winner
0	99	TVADSDESYMEK	Oxidation(M)@10		0.0005	1389.56	2	21	1.1.1.1001.10	Winner
0	99	TVADSDESYMEK	Oxidation(M)@10		0.0005	1389.56	2	21	1.1.1.1007.7	Winner
0	99	TVADSDESYMEK	Oxidation(M)@10		0.0005	1389.56	2	20	1.1.1.1013.6	Winner
0	99	TVADSDESYMEK	Oxidation(M)@10		0.0008	1389.56	2	15	1.1.1.1019.8	Winner
0	99	TVADSDESYMEK	Oxidation(M)@10		0.0003	1389.56	2	16	1.1.1.1024.8	Winner
0	99	TVADSDESYMEK	Oxidation(M)@10		0.0005	1389.56	2	12	1.1.1.1030.8	Winner
0	99	TVADSDESYMEK	Oxidation(M)@10		0.0015	1389.56	2	14	1.1.1.1036.7	Winner
0	99	TVADSDESYMEK	Oxidation(M)@10		0.0005	1389.56	2	9	1.1.1.1085.9	Winner
0	95.9	TVADSDESYMEK	Oxidation(M)@10		0.0011	1389.56	2	8	1.1.1.1042.15	Winner
0	79.4	TVADSDESYMEK	Oxidation(M)@10		0.0015	1389.56	2	8	1.1.1.1097.8	Winner
0	99	ESALNLPYHMPENK	Oxidation(M)@10; Deamidated(N)@13		0.0025	1658.76	3	12	1.1.1.1390.4	Winner
0	99	TVADSDESYMEK	Oxidation(M)@10; Delta:H(4)C(2)(K)@12		-0.0016	1417.59	2	12	1.1.1.1164.7	Winner
0	99	TVADSDESYMEK	Oxidation(M)@10; Delta:H(4)C(2)(K)@12		-0.0016	1417.59	2	11	1.1.1.1169.9	Winner
0	20.1	TVADSDESYMEK	Oxidation(M)@10; Delta:H(4)C(2)(K)@12		-0.0016	1417.59	2	8	1.1.1.1159.7	Winner
2	99	EIIDTANTTEMN	Oxidation(M)@11	cleaved N-S@C-term	0.0006	1366.59	2	16	1.1.1.1215.7	Winner
0	99	EIIDTANTTEMN	Oxidation(M)@11	cleaved N-S@C-term	0.0006	1366.59	2	18	1.1.1.1210.6	Winner
0	99	EIIDTANTTEMNSDHHSK	Oxidation(M)@11		0.0023	2057.9	4	15	1.1.1.1022.9	Winner
0	99	EIIDTANTTEMNSDHHSK	Oxidation(M)@11		0.0023	2057.9	4	20	1.1.1.1028.7	Winner
0	99	EIIDTANTTEMNSDHHSK	Oxidation(M)@11		0.0023	2057.9	4	20	1.1.1.1034.9	Winner
0	94.4	EIIDTANTTEMNSDHHSK	Oxidation(M)@11		0.0023	2057.9	4	11	1.1.1.1016.9	Winner
0	94.4	EIIDTANTTEMNSDHHSK	Oxidation(M)@11		0.0023	2057.9	4	11	1.1.1.1035.5	Winner
0	99	EIIDTANTTEMNSDHHSK	Oxidation(M)@11; Deamidated(N)@12		0.0058	2058.89	4	14	1.1.1.1040.5	Winner
0	99	EIIDTANTTEMNSDHHSK	Oxidation(M)@11; Deamidated(N)@12		0.0019	2058.88	3	17	1.1.1.1043.9	Winner
0	99	EIIDTANTTEMNSDHHSK	Oxidation(M)@11; Deamidated(N)@12		0.0058	2058.89	4	13	1.1.1.1045.7	Winner
0	99	EIIDTANTTEMNSDHHSK	Oxidation(M)@11; Deamidated(N)@12		0.0019	2058.88	3	15	1.1.1.1048.12	Winner
0	99	EIIDTANTTEMNSDHHSK	Oxidation(M)@11; Deamidated(N)@12		0.0058	2058.89	4	13	1.1.1.1050.6	Winner
0	99	EIIDTANTTEMNSDHHSK	Oxidation(M)@11; Deamidated(N)@12		0.0019	2058.88	3	16	1.1.1.1053.10	Winner
0	98.5	EIIDTANTTEMNSDHHSK	Oxidation(M)@11; Deamidated(N)@12		0.0021	2058.88	4	12	1.1.1.1058.8	Winner
2	99	ITAEEEEEIGEDSQFMILAK	Oxidation(M)@16		-0.0018	2297.06	3	28	1.1.1.2019.4	Winner
0	99	ITAEEEEEIGEDSQFMILAK	Oxidation(M)@16		-0.0018	2297.06	3	26	1.1.1.2009.3	Winner
0	99	ITAEEEEEIGEDSQFMILAK	Oxidation(M)@16		-0.0018	2297.06	3	31	1.1.1.2014.3	Winner
0	99	DMGTDGKEELK	Oxidation(M)@2	missed K-E@7	0.0002	1237.55	3	12	1.1.1.879.2	Winner
0	99	DMGTDGKEELKADVVPVTLAPK	Oxidation(M)@2	missed K-E@7; missed K-A@11	0.0038	2328.19	4	19	1.1.1.1538.3	Winner
0	99	DMGTDGKEELKADVVPVTLAPK	Oxidation(M)@2	missed K-E@7; missed K-A@11	0.0038	2328.19	4	22	1.1.1.1543.2	Winner
0	99	DMGTDGKEELKADVVPVTLAPK	Oxidation(M)@2	missed K-E@7; missed K-A@11	0.0038	2328.19	4	25	1.1.1.1549.2	Winner
0	99	DMGTDGKEELKADVVPVTLAPK	Oxidation(M)@2	missed K-E@7; missed K-A@11	0.0038	2328.19	4	20	1.1.1.1555.4	Winner
0	99	DMGTDGKEELKADVVPVTLAPK	Oxidation(M)@2	missed K-E@7; missed K-A@11	-0.0006	2328.19	4	17	1.1.1.1564.3	Winner
0	99	DMGTDGKEELKADVVPVTLAPK	Oxidation(M)@2	missed K-E@7; missed K-A@11	-0.0011	2328.19	4	15	1.1.1.1570.3	Winner
0	99	EMDKENNDGSSEIGK	Oxidation(M)@2	missed K-E@4	-0.0028	1667.69	3	15	1.1.1.844.2	Winner
0	99	EMDKENNDGSSEIGK	Oxidation(M)@2	missed K-E@4	-0.0028	1667.69	3	18	1.1.1.855.2	Winner
0	99	EMDKENNDGSSEIGK	Oxidation(M)@2	missed K-E@4	-0.0024	1667.69	3	15	1.1.1.866.2	Winner
0	99	PMVIQESK	Oxidation(M)@2	cleaved R-P@N-term	0.0013	946.481	2	12	1.1.1.924.2	Winner
0	99	PMVIQESK	Oxidation(M)@2	cleaved R-P@N-term	0.0013	946.481	2	13	1.1.1.930.6	Winner
0	99	PMVIQESK	Oxidation(M)@2	cleaved R-P@N-term	0.0013	946.481	2	13	1.1.1.936.3	Winner
0	99	PMVIQESK	Oxidation(M)@2	cleaved R-P@N-term	0.0013	946.481	2	12	1.1.1.942.4	Winner
0	99	PMVIQESK	Oxidation(M)@2	cleaved R-P@N-term	0.0013	946.481	2	9	1.1.1.972.2	Winner
0	99	PMVIQESK	Oxidation(M)@2	cleaved R-P@N-term	0.0013	946.481	2	11	1.1.1.979.2	Winner
0	98.1	DMGTDGKEELK	Oxidation(M)@2	missed K-E@7	0.0002	1237.55	3	11	1.1.1.886.2	Winner
0	97.4	PMVIQESK	Oxidation(M)@2	cleaved R-P@N-term	0.0039	946.483	2	7	1.1.1.1016.7	Winner
0	97.3	DMGTDGKEELK	Oxidation(M)@2	missed K-E@7	-0.0001	1237.55	3	10	1.1.1.873.2	Winner
0.14	95.1	DMGTDGKEELKAD	Oxidation(M)@2	cleaved D-V@C-term; missed K-E@7; missed K-A@11	0.0009	1423.61	3	10	1.1.1.959.5	Winner
0	87.1	PMVIQESK	Oxidation(M)@2	cleaved R-P@N-term	-0.0007	946.479	2	8	1.1.1.948.6	Winner
0	65.3	PMVIQESK	Oxidation(M)@2	cleaved R-P@N-term	-0.0075	946.472	2	8	1.1.1.961.4	Winner
0	49.2	PMVIQESK	Oxidation(M)@2	cleaved R-P@N-term	0.0045	946.484	2	8	1.1.1.1055.3	Winner
0	17.7	DMGTDGKEELK	Oxidation(M)@2	missed K-E@7	0.0002	1237.55	3	7	1.1.1.892.2	Winner
0	17	PMVIQESK	Oxidation(M)@2	cleaved R-P@N-term	0.0047	946.484	2	5	1.1.1.1065.7	Winner
0	99	EMDKENNDGSSEIGK	Oxidation(M)@2; Deamidated(N)@6	missed K-E@4	-0.0024	1668.68	3	14	1.1.1.882.5	Winner
2	99	SFMTSPSPK	Oxidation(M)@3	cleaved P-S@N-term	0.0005	996.459	2	12	1.1.1.976.3	Winner
0	99	SFMTSPSPK	Oxidation(M)@3	cleaved P-S@N-term	0.0005	996.459	2	12	1.1.1.982.3	Winner
2	99	ENMEELLNLCSGK	Oxidation(M)@3; Cys->Dha(C)@10		0.0006	1460.68	2	16	1.1.1.1579.3	Winner
0	99	ENMEELLNLCSGK	Oxidation(M)@3; Cys->Dha(C)@10		0.0032	1460.68	2	11	1.1.1.1550.5	Winner
0	99	ENMEELLNLCSGK	Oxidation(M)@3; Cys->Dha(C)@10		0.0032	1460.68	2	13	1.1.1.1555.5	Winner
0	99	ENMEELLNLCSGK	Oxidation(M)@3; Cys->Dha(C)@10		0.0012	1460.68	2	13	1.1.1.1564.5	Winner
0	99	ENMEELLNLCSGK	Oxidation(M)@3; Cys->Dha(C)@10		0.0015	1460.68	2	10	1.1.1.1570.6	Winner
0	99	ENMEELLNLCSGK	Oxidation(M)@3; Dioxidation(C)@10		0.0018	1526.66	2	13	1.1.1.1567.4	Winner
0	99	ENMEELLNLCSGK	Oxidation(M)@3; Trioxidation(C)@10		0.0019	1542.66	2	20	1.1.1.1562.3	Winner
0	99	ENMEELLNLCSGK	Oxidation(M)@3; Trioxidation(C)@10		0.001	1542.66	2	22	1.1.1.1568.2	Winner
0	99	ENMEELLNLCSGK	Oxidation(M)@3; Trioxidation(C)@10		0.001	1542.66	2	22	1.1.1.1574.2	Winner
0	99	ENMEELLNLCSGK	Oxidation(M)@3; Trioxidation(C)@10		0.001	1542.66	2	22	1.1.1.1580.4	Winner
0	99	ENMEELLNLCSGK	Oxidation(M)@3; Trioxidation(C)@10		0.0013	1542.66	2	22	1.1.1.1586.2	Winner
0	99	ENMEELLNLCSGK	Oxidation(M)@3; Trioxidation(C)@10; Formyl(K)@13		0.0207	1570.67	2	15	1.1.1.1834.4	Winner
2	99	SRPMVIQESK	Oxidation(M)@4	cleaved A-S@N-term	-0.0012	1189.61	2	14	1.1.1.957.6	Winner
1.24	99	GNAMALLK	Oxidation(M)@4	cleaved H-G@N-term	-0.0023	832.445	2	9	1.1.1.1069.3	Winner
0	99	SRPMVIQESK	Oxidation(M)@4	cleaved A-S@N-term	0.0007	1189.61	2	13	1.1.1.951.3	Winner
0	99	SRPMVIQESK	Oxidation(M)@4	cleaved A-S@N-term	-0.0012	1189.61	2	11	1.1.1.963.8	Winner
0	98.8	GNAMALLK	Oxidation(M)@4	cleaved H-G@N-term	-0.0023	832.445	2	9	1.1.1.1074.4	Winner
0	94.4	GNAMALLK	Oxidation(M)@4	cleaved H-G@N-term	-0.0023	832.445	2	8	1.1.1.1085.2	Winner
0	73.5	GNAMALLK	Oxidation(M)@4	cleaved H-G@N-term	-0.0023	832.445	2	8	1.1.1.1079.2	Winner
2	99	KENMEELLNLCSGK	Oxidation(M)@4; Trioxidation(C)@11	missed K-E@1	-0.0006	1670.75	2	20	1.1.1.1427.4	Winner
0	99	KENMEELLNLCSGK	Oxidation(M)@4; Trioxidation(C)@11	missed K-E@1	-0.0006	1670.75	2	15	1.1.1.1422.6	Winner
0	99	KENMEELLNLCSGK	Oxidation(M)@4; Trioxidation(C)@11	missed K-E@1	-0.0006	1670.75	2	21	1.1.1.1432.4	Winner
0	99	KENMEELLNLCSGK	Oxidation(M)@4; Trioxidation(C)@11	missed K-E@1	-0.0006	1670.75	2	21	1.1.1.1437.2	Winner
2	99	HGNAMALLK	Oxidation(M)@5	cleaved C-H@N-term	-0.001	969.506	2	10	1.1.1.956.4	Winner
1.74	99	ASRPMVIQESK	Oxidation(M)@5	cleaved N-A@N-term	0.0015	1260.65	3	12	1.1.1.949.2	Winner
0	99	ASRPMVIQESK	Oxidation(M)@5	cleaved N-A@N-term	0.0015	1260.65	3	12	1.1.1.943.2	Winner
0	99	ASRPMVIQESK	Oxidation(M)@5	cleaved N-A@N-term	0.0026	1260.65	2	10	1.1.1.956.6	Winner
0	99	DEKEMDKENNDGSSEIGK	Oxidation(M)@5	missed K-E@3; missed K-E@7	-0.0026	2039.86	4	16	1.1.1.868.2	Winner
0	99	DEKEMDKENNDGSSEIGK	Oxidation(M)@5	missed K-E@3; missed K-E@7	-0.0026	2039.86	4	19	1.1.1.876.3	Winner
0	99	DEKEMDKENNDGSSEIGK	Oxidation(M)@5	missed K-E@3; missed K-E@7	-0.0026	2039.86	4	21	1.1.1.882.3	Winner
0	99	DEKEMDKENNDGSSEIGK	Oxidation(M)@5	missed K-E@3; missed K-E@7	-0.0026	2039.86	4	15	1.1.1.888.3	Winner
0	99	GPSFMTSPSPK	Oxidation(M)@5		0.0004	1150.53	2	11	1.1.1.1054.8	Winner
0	99	GPSFMTSPSPK	Oxidation(M)@5		-0.0005	1150.53	2	16	1.1.1.1091.5	Winner
0	99	GPSFMTSPSPK	Oxidation(M)@5		-0.0005	1150.53	2	18	1.1.1.1097.7	Winner
0	99	GPSFMTSPSPK	Oxidation(M)@5		-0.0005	1150.53	2	19	1.1.1.1103.6	Winner
0	99	GPSFMTSPSPK	Oxidation(M)@5		-0.0005	1150.53	2	19	1.1.1.1109.9	Winner
0	99	GPSFMTSPSPK	Oxidation(M)@5		-0.0009	1150.53	2	17	1.1.1.1115.12	Winner
0	99	GPSFMTSPSPK	Oxidation(M)@5		-0.0011	1150.53	2	14	1.1.1.1121.10	Winner
0	99	HGNAMALLK	Oxidation(M)@5	cleaved C-H@N-term	-0.0006	969.506	2	10	1.1.1.962.3	Winner
0	98.8	ASRPMVIQESK	Oxidation(M)@5	cleaved N-A@N-term	0.0015	1260.65	3	10	1.1.1.937.2	Winner
0	53.8	GPSFMTSPSPK	Oxidation(M)@5		-0.0005	1150.53	2	7	1.1.1.1127.14	Winner
0	99	DEKEMDKENNDGSSEIGK	Oxidation(M)@5; Deamidated(N)@10	missed K-E@3; missed K-E@7	0.0023	2040.85	4	21	1.1.1.894.3	Winner
0	99	DEKEMDKENNDGSSEIGK	Oxidation(M)@5; Deamidated(N)@10	missed K-E@3; missed K-E@7	-0.0026	2040.84	3	25	1.1.1.900.3	Winner
0	98.5	DEKEMDKENNDGSSEIGK	Oxidation(M)@5; Deamidated(N)@10	missed K-E@3; missed K-E@7	0.0023	2040.85	4	12	1.1.1.905.4	Winner
0	99	DEKEMDKENNDGSSEIGK	Oxidation(M)@5; Deamidated(N)@9	missed K-E@3; missed K-E@7	-0.0026	2040.84	3	26	1.1.1.891.4	Winner
0	99	GPSFMTSPSPK	Oxidation(M)@5; Phospho(S)@7		0.0016	1230.5	2	14	1.1.1.1276.4	Winner
0	99	GPSFMTSPSPK	Oxidation(M)@5; Phospho(S)@7		-0.0008	1230.5	2	11	1.1.1.1327.8	Winner
0	98.5	GPSFMTSPSPK	Oxidation(M)@5; Phospho(S)@7		-0.0006	1230.5	2	8	1.1.1.1244.15	Winner
0	99	GPSFMTSPSPK	Oxidation(M)@5; Phospho(S)@9		-0.0006	1230.5	2	12	1.1.1.1284.7	Winner
0	99	GPSFMTSPSPK	Oxidation(M)@5; Phospho(S)@9		-0.0008	1230.5	2	10	1.1.1.1290.11	Winner
0	99	GPSFMTSPSPK	Oxidation(M)@5; Phospho(S)@9		-0.0018	1230.5	2	12	1.1.1.1302.10	Winner
0	99	GPSFMTSPSPK	Oxidation(M)@5; Phospho(S)@9		-0.0015	1230.5	2	12	1.1.1.1308.6	Winner
0	99	GPSFMTSPSPK	Oxidation(M)@5; Phospho(S)@9		-0.001	1230.5	2	13	1.1.1.1314.4	Winner
0	99	GPSFMTSPSPK	Oxidation(M)@5; Phospho(S)@9		-0.0008	1230.5	2	15	1.1.1.1320.3	Winner
0	98.5	GPSFMTSPSPK	Oxidation(M)@5; Phospho(S)@9		-0.0008	1230.5	2	11	1.1.1.1365.9	Winner
0	98.5	GPSFMTSPSPK	Oxidation(M)@5; Phospho(S)@9		0.0045	1230.5	2	10	1.1.1.1383.6	Winner
0	98.1	GPSFMTSPSPK	Oxidation(M)@5; Phospho(S)@9		-0.0012	1230.5	2	11	1.1.1.1334.3	Winner
0	90.4	GPSFMTSPSPK	Oxidation(M)@5; Phospho(S)@9		-0.0008	1230.5	2	9	1.1.1.1341.8	Winner
0	89.3	GPSFMTSPSPK	Oxidation(M)@5; Phospho(S)@9		-0.0012	1230.5	2	9	1.1.1.1296.9	Winner
0	85.7	GPSFMTSPSPK	Oxidation(M)@5; Phospho(S)@9		0.0029	1230.5	2	10	1.1.1.1398.3	Winner
0	44.6	GPSFMTSPSPK	Oxidation(M)@5; Phospho(S)@9		0.004	1230.5	2	9	1.1.1.1371.9	Winner
0	99	NASRPMVIQESK	Oxidation(M)@6		0.0025	1374.7	3	13	1.1.1.952.5	Winner
0	99	NASRPMVIQESK	Oxidation(M)@6		0.0025	1374.7	3	15	1.1.1.959.3	Winner
0	99	NASRPMVIQESK	Oxidation(M)@6		0.0025	1374.7	3	13	1.1.1.965.4	Winner
0	99	NASRPMVIQESK	Oxidation(M)@6		0.0023	1374.69	3	14	1.1.1.971.5	Winner
0	99	RGPSFMTSPSPK	Oxidation(M)@6	missed R-G@1	0.0012	1306.64	3	12	1.1.1.1026.2	Winner
0	99	RGPSFMTSPSPK	Oxidation(M)@6	missed R-G@1	0.0012	1306.64	3	14	1.1.1.1032.2	Winner
0	99	RGPSFMTSPSPK	Oxidation(M)@6	missed R-G@1	0.0012	1306.64	3	15	1.1.1.1038.2	Winner
0	99	RGPSFMTSPSPK	Oxidation(M)@6	missed R-G@1	0.0012	1306.64	3	14	1.1.1.1043.4	Winner
0	99	RGPSFMTSPSPK	Oxidation(M)@6	missed R-G@1	0.0015	1306.64	3	13	1.1.1.1048.5	Winner
0	98.1	NASRPMVIQESK	Oxidation(M)@6		-0.0013	1374.69	3	11	1.1.1.992.3	Winner
0	97.8	NASRPMVIQESK	Oxidation(M)@6		-0.0013	1374.69	3	11	1.1.1.986.4	Winner
0	96.5	RGPSFMTSPSPK	Oxidation(M)@6	missed R-G@1	0.0015	1306.64	3	10	1.1.1.1053.5	Winner
0	81.7	NASRPMVIQESK	Oxidation(M)@6		0.0023	1374.69	3	10	1.1.1.946.5	Winner
0	31.2	NASRPMVIQESK	Oxidation(M)@6		-0.0016	1374.69	3	9	1.1.1.998.4	Winner
0	28.1	KDEKEMDKENNDGSSEIGK	Oxidation(M)@6	cleaved T-K@N-term; missed K-D@1; missed K-E@4; missed K-E@8	-0.0003	2167.95	4	10	1.1.1.667.3	Winner
0	13.5	NASRPMVIQESK	Oxidation(M)@6		0.0023	1374.69	3	7	1.1.1.940.2	Winner
0	12	NASRPMVIQESK	Oxidation(M)@6		-0.0095	1374.68	3	7	1.1.1.1028.6	Winner
0	90.2	NASRPMVIQESK	Oxidation(M)@6; Deamidated(Q)@9		0.0044	1375.68	3	11	1.1.1.980.4	Winner
2	99	LPLASMDENAM	Oxidation(M)@6; Oxidation(M)@11	cleaved M-D@C-term	-0.0012	1222.52	2	15	1.1.1.1264.3	Winner
2	99	LPLASMDENAMD	Oxidation(M)@6; Oxidation(M)@11	cleaved D-A@C-term	-0.0014	1337.55	2	14	1.1.1.1274.2	Winner
0	99	LPLASMDENAM	Oxidation(M)@6; Oxidation(M)@11	cleaved M-D@C-term	-0.0011	1222.52	2	15	1.1.1.1246.5	Winner
0	99	LPLASMDENAM	Oxidation(M)@6; Oxidation(M)@11	cleaved M-D@C-term	-0.0011	1222.52	2	15	1.1.1.1252.3	Winner
0	99	LPLASMDENAM	Oxidation(M)@6; Oxidation(M)@11	cleaved M-D@C-term	-0.0011	1222.52	2	14	1.1.1.1258.6	Winner
0	45	LPLASMDENAMD	Oxidation(M)@6; Oxidation(M)@11	cleaved D-A@C-term	-0.0133	1337.53	2	8	1.1.1.1267.8	Winner
2	99	LPLASMDENAMDANM	Oxidation(M)@6; Oxidation(M)@11; Oxidation(M)@15	cleaved M-D@C-term	-0.0009	1669.66	2	18	1.1.1.1299.6	Winner
0	99	LPLASMDENAMDANM	Oxidation(M)@6; Oxidation(M)@11; Oxidation(M)@15	cleaved M-D@C-term	-0.0009	1669.66	2	16	1.1.1.1293.7	Winner
2	99	LPLASMDENAMDANMDELLDLCTGK	Oxidation(M)@6; Oxidation(M)@11; Oxidation(M)@15; Trioxidation(C)@22		-0.0054	2805.16	3	27	1.1.1.2075.2	Winner
0	99	LPLASMDENAMDANMDELLDLCTGK	Oxidation(M)@6; Oxidation(M)@11; Oxidation(M)@15; Trioxidation(C)@22		-0.0054	2805.16	3	26	1.1.1.2059.2	Winner
0	53.8	RGPSFMTSPSPK	Oxidation(M)@6; Phospho(S)@10	missed R-G@1	-0.0012	1386.6	2	5	1.1.1.1194.11	Winner
0	24.5	RGPSFMTSPSPK	Oxidation(M)@6; Phospho(S)@10	missed R-G@1	-0.0009	1386.6	2	7	1.1.1.1177.7	Winner
0	12.5	RGPSFMTSPSPK	Oxidation(M)@6; Phospho(S)@10	missed R-G@1	-0.0009	1386.6	2	6	1.1.1.1184.16	Winner
2	99	KRGPSFMTSPSPK	Oxidation(M)@7	missed K-R@1; missed R-G@2	-0.0009	1434.73	3	16	1.1.1.939.2	Winner
0	99	KRGPSFMTSPSPK	Oxidation(M)@7	missed K-R@1; missed R-G@2	-0.0009	1434.73	3	15	1.1.1.945.4	Winner
0	97.3	KRGPSFMTSPSPK	Oxidation(M)@7	missed K-R@1; missed R-G@2	-0.0009	1434.73	3	11	1.1.1.933.2	Winner
0	79.4	KRGPSFMTSPSPK	Oxidation(M)@7	missed K-R@1; missed R-G@2	0	1434.73	3	10	1.1.1.951.2	Winner
2	99	NIDDASQMDLFHR	Oxidation(M)@8		0.0007	1576.69	3	15	1.1.1.1375.3	Winner
0	99	NIDDASQMDLFHR	Oxidation(M)@8		0.0014	1576.7	3	13	1.1.1.1363.3	Winner
0	99	NIDDASQMDLFHR	Oxidation(M)@8		0.0007	1576.69	3	15	1.1.1.1369.6	Winner
0	99	NIDDASQMDLFHR	Oxidation(M)@8		0.0007	1576.69	3	13	1.1.1.1380.4	Winner
0	99	NIDDASQMDLFHR	Oxidation(M)@8		-0.0013	1576.69	3	12	1.1.1.1385.4	Winner
0	99	NIDDASQMDLFHR	Oxidation(M)@8		-0.0013	1576.69	3	11	1.1.1.1390.3	Winner
0	73.5	KPRPTCHGNAMALLK	Oxidation(P)@2; Dioxidation(C)@6; Oxidation(M)@11		0.0017	1699.85	4	11	1.1.1.1027.2	Winner
2	99	KPRPTCHGNAMALLK	Oxidation(P)@4; Dioxidation(C)@6; Oxidation(M)@11		-0.0006	1699.85	3	20	1.1.1.1022.13	Winner
0	99	KPRPTCHGNAMALLK	Oxidation(P)@4; Dioxidation(C)@6; Oxidation(M)@11		-0.0006	1699.85	3	19	1.1.1.1028.9	Winner
0	99	ETQIITGSDESCRK	Phospho(S)@11	missed R-K@13	-0.0087	1645.69	2	9	1.1.1.1106.7	Winner
2	99	SPSPGLFR	Phospho(S)@3		-0.001	939.42	2	11	1.1.1.1629.2	Winner
0	99	SPSPGLFR	Phospho(S)@3		0.0008	939.422	2	11	1.1.1.1468.2	Winner
0	99	SPSPGLFR	Phospho(S)@3		0.0008	939.422	2	12	1.1.1.1473.2	Winner
0	99	SPSPGLFR	Phospho(S)@3		0.0008	939.422	2	12	1.1.1.1478.2	Winner
0	99	SPSPGLFR	Phospho(S)@3		0.001	939.423	2	12	1.1.1.1483.2	Winner
0	99	SPSPGLFR	Phospho(S)@3		0.001	939.423	2	12	1.1.1.1489.2	Winner
0	99	SPSPGLFR	Phospho(S)@3		-0.0006	939.421	2	12	1.1.1.1495.3	Winner
0	99	SPSPGLFR	Phospho(S)@3		0.001	939.423	2	12	1.1.1.1505.3	Winner
0	99	SPSPGLFR	Phospho(S)@3		0.0008	939.422	2	12	1.1.1.1514.3	Winner
0	99	SPSPGLFR	Phospho(S)@3		0.0014	939.423	2	11	1.1.1.1519.3	Winner
0	99	SPSPGLFR	Phospho(S)@3		0.0008	939.422	2	11	1.1.1.1525.2	Winner
0	99	SPSPGLFR	Phospho(S)@3		0.0008	939.422	2	12	1.1.1.1530.2	Winner
0	99	SPSPGLFR	Phospho(S)@3		0.001	939.423	2	11	1.1.1.1535.2	Winner
0	99	SPSPGLFR	Phospho(S)@3		0.0018	939.423	2	12	1.1.1.1540.2	Winner
0	99	SPSPGLFR	Phospho(S)@3		0.001	939.423	2	11	1.1.1.1545.3	Winner
0	99	SPSPGLFR	Phospho(S)@3		0.001	939.423	2	11	1.1.1.1551.2	Winner
0	99	SPSPGLFR	Phospho(S)@3		0.0008	939.422	2	10	1.1.1.1556.3	Winner
0	99	SPSPGLFR	Phospho(S)@3		0.0006	939.422	2	11	1.1.1.1565.3	Winner
0	99	SPSPGLFR	Phospho(S)@3		0.0008	939.422	2	11	1.1.1.1583.4	Winner
0	99	SPSPGLFR	Phospho(S)@3		0.0008	939.422	2	11	1.1.1.1589.3	Winner
0	99	SPSPGLFR	Phospho(S)@3		0.0008	939.422	2	10	1.1.1.1594.2	Winner
0	99	SPSPGLFR	Phospho(S)@3		0.0008	939.422	2	11	1.1.1.1601.2	Winner
0	99	SPSPGLFR	Phospho(S)@3		0.0008	939.422	2	11	1.1.1.1606.2	Winner
0	99	SPSPGLFR	Phospho(S)@3		0.0013	939.423	2	9	1.1.1.1617.2	Winner
0	99	SPSPGLFR	Phospho(S)@3		0.0013	939.423	2	12	1.1.1.1637.2	Winner
0	99	SPSPGLFR	Phospho(S)@3		0.0008	939.422	2	11	1.1.1.1646.2	Winner
0	99	SPSPGLFR	Phospho(S)@3		0.0008	939.422	2	11	1.1.1.1662.2	Winner
0	99	SPSPGLFR	Phospho(S)@3		0.0008	939.422	2	11	1.1.1.1691.2	Winner
0	99	SPSPGLFR	Phospho(S)@3		0.0004	939.422	2	11	1.1.1.1701.2	Winner
0	99	SPSPGLFR	Phospho(S)@3		-0.0012	939.42	2	11	1.1.1.1710.2	Winner
0	99	SPSPGLFR	Phospho(S)@3		-0.001	939.42	2	11	1.1.1.1726.2	Winner
0	99	SPSPGLFR	Phospho(S)@3		0.0013	939.423	2	10	1.1.1.1742.2	Winner
0	99	SPSPGLFR	Phospho(S)@3		0.0006	939.422	2	11	1.1.1.1757.2	Winner
0	99	SPSPGLFR	Phospho(S)@3		0.0008	939.422	2	11	1.1.1.1785.3	Winner
0	99	SPSPGLFR	Phospho(S)@3		0.0022	939.424	2	10	1.1.1.1801.3	Winner
0	99	SPSPGLFR	Phospho(S)@3		0.0013	939.423	2	11	1.1.1.1833.2	Winner
0	98.9	SPSPGLFR	Phospho(S)@3		0.0013	939.423	2	10	1.1.1.1577.3	Winner
0	98.8	SPSPGLFR	Phospho(S)@3		-0.0008	939.421	2	10	1.1.1.1571.3	Winner
0	98.8	SPSPGLFR	Phospho(S)@3		0.0004	939.422	2	9	1.1.1.1854.2	Winner
0.68	98.7	TLSPVKAEAAK	Phospho(S)@3	cleaved H-T@N-term; missed K-A@6	-0.0004	1193.61	2	9	1.1.1.1087.9	Winner
0	98.7	SPSPGLFR	Phospho(S)@3		-0.0008	939.421	2	9	1.1.1.1463.2	Winner
0	98.5	SPSPGLFR	Phospho(S)@3		0.0013	939.423	2	10	1.1.1.1678.2	Winner
0	98.1	SPSPGLFR	Phospho(S)@3		-0.0012	939.42	2	9	1.1.1.1773.3	Winner
0	92.9	SPSPGLFR	Phospho(S)@3		-0.0016	939.42	2	8	1.1.1.1886.2	Winner
0	82.6	SPSPGLFR	Phospho(S)@3		0.002	939.424	2	9	1.1.1.1828.2	Winner
0	37.4	SPSPGLFR	Phospho(S)@3		0.0008	939.422	2	7	1.1.1.1848.3	Winner
0	98.5	ASLVSSASK	Phospho(S)@6		0.001	928.428	2	8	1.1.1.1004.6	Winner
0	95.2	ASLVSSASK	Phospho(S)@6		0.0122	928.439	2	10	1.1.1.997.2	Winner
2	99	NFVFHTLSPVKAEAAK	Phospho(S)@8	missed K-A@11	-0.0026	1837.91	3	19	1.1.1.1690.3	Winner
0	99	NFVFHTLSPVK	Phospho(S)@8		0.0007	1367.66	2	16	1.1.1.1819.3	Winner
0	99	NFVFHTLSPVK	Phospho(S)@8		0.0003	1367.66	2	15	1.1.1.1827.3	Winner
0	99	NFVFHTLSPVK	Phospho(S)@8		0.0003	1367.66	2	16	1.1.1.1832.2	Winner
0	99	NFVFHTLSPVK	Phospho(S)@8		0.0001	1367.66	2	17	1.1.1.1837.2	Winner
0	99	NFVFHTLSPVK	Phospho(S)@8		0.0001	1367.66	2	16	1.1.1.1843.2	Winner
0	99	NFVFHTLSPVK	Phospho(S)@8		0.0003	1367.66	2	16	1.1.1.1848.6	Winner
0	99	NFVFHTLSPVK	Phospho(S)@8		0.0007	1367.66	2	18	1.1.1.1853.4	Winner
0	99	NFVFHTLSPVK	Phospho(S)@8		-0.0001	1367.66	2	16	1.1.1.1858.3	Winner
0	99	NFVFHTLSPVKAEAAK	Phospho(S)@8	missed K-A@11	0.0022	1837.91	3	16	1.1.1.1600.2	Winner
0	99	NFVFHTLSPVKAEAAK	Phospho(S)@8	missed K-A@11	0.0026	1837.92	3	20	1.1.1.1605.2	Winner
0	99	NFVFHTLSPVKAEAAK	Phospho(S)@8	missed K-A@11	0.0018	1837.91	3	20	1.1.1.1616.2	Winner
0	99	NFVFHTLSPVKAEAAK	Phospho(S)@8	missed K-A@11	0.0018	1837.91	3	22	1.1.1.1628.2	Winner
0	99	NFVFHTLSPVKAEAAK	Phospho(S)@8	missed K-A@11	0.0022	1837.91	3	21	1.1.1.1636.2	Winner
0	99	NFVFHTLSPVKAEAAK	Phospho(S)@8	missed K-A@11	0.0017	1837.91	3	22	1.1.1.1645.2	Winner
0	99	NFVFHTLSPVKAEAAK	Phospho(S)@8	missed K-A@11	0.0017	1837.91	3	19	1.1.1.1661.2	Winner
0	99	NFVFHTLSPVKAEAAK	Phospho(S)@8	missed K-A@11	0.0013	1837.91	3	20	1.1.1.1677.3	Winner
0	99	NFVFHTLSPVKAEAAK	Phospho(S)@8	missed K-A@11	0.0013	1837.91	3	18	1.1.1.1706.2	Winner
0	97.9	ETQIITGSDESCRK	Phospho(T)@2	missed R-K@13	-0.0087	1645.69	2	9	1.1.1.1100.9	Winner
0	73.5	PTCHGNAMALLK	Phospho(T)@2; Oxidation(M)@8	cleaved R-P@N-term	-0.0109	1350.57	2	8	1.1.1.1214.6	Winner
1.89	98.7	RFTLDR	Phospho(T)@3	missed R-F@1	0.0022	886.408	2	8	1.1.1.1198.3	Winner
0	48.2	RFTLDR	Phospho(T)@3	missed R-F@1	0.0019	886.408	2	7	1.1.1.1186.2	Winner
0	38.3	RFTLDR	Phospho(T)@3	missed R-F@1	0.0001	886.406	2	7	1.1.1.1192.2	Winner
0	24.5	RFTLDR	Phospho(T)@3	missed R-F@1	0.0022	886.408	2	6	1.1.1.1203.3	Winner
0	20.5	RFTLDR	Phospho(T)@3	missed R-F@1	0.0025	886.409	2	6	1.1.1.1213.2	Winner
0	93.1	QPSKLDEDDSCSLLTK	Propionamide(C)@11	missed K-L@4	-0.0031	1848.87	3	11	1.1.1.1327.9	Winner
0	45	QPSKLDEDDSCSLLTK	Propionamide(C)@11	missed K-L@4	-0.0031	1848.87	3	10	1.1.1.1333.10	Winner
0	40.7	QPSKLDEDDSCSLLTK	Propionamide(C)@11	missed K-L@4	-0.0031	1848.87	3	10	1.1.1.1339.4	Winner
0	99	ETQIITGSDESCR	Propionamide(C)@12		0.0002	1508.68	2	13	1.1.1.1142.12	Winner
0	99	ETQIITGSDESCR	Propionamide(C)@12		-0.0001	1508.68	2	19	1.1.1.1147.14	Winner
0	99	ETQIITGSDESCR	Propionamide(C)@12		-0.0001	1508.68	2	21	1.1.1.1152.8	Winner
0	99	ETQIITGSDESCR	Propionamide(C)@12		-0.0001	1508.68	2	18	1.1.1.1157.7	Winner
0	99	ETQIITGSDESCR	Propionamide(C)@12		0.0003	1508.68	2	13	1.1.1.1162.10	Winner
0	99	ETQIITGSDESCRK	Propionamide(C)@12	missed R-K@13	-0.0012	1636.77	3	15	1.1.1.1042.13	Winner
0	99	ETQIITGSDESCRK	Propionamide(C)@12	missed R-K@13	-0.0012	1636.77	3	16	1.1.1.1047.14	Winner
0	99	ETQIITGSDESCRK	Propionamide(C)@12	missed R-K@13	-0.0012	1636.77	3	15	1.1.1.1052.9	Winner
0	99	ETQIITGSDESCRK	Propionamide(C)@12	missed R-K@13	-0.0012	1636.77	3	13	1.1.1.1057.5	Winner
0	19	ETQIITGSDESCRK	Propionamide(C)@12	missed R-K@13	0.0015	1636.77	3	8	1.1.1.1037.8	Winner
0	99	ETQIITGSDESCR	Propionamide(C)@12; Oxidation(R)@13		-0.0009	1524.67	2	11	1.1.1.1106.6	Winner
0	6.1	ETQIITGSDESCR	Propionamide(C)@12; Oxidation(R)@13		-0.0009	1524.67	2	8	1.1.1.1100.8	Winner
0	99	SETDENSGKQPSKLDEDDSCSLLTK	Propionamide(C)@20	missed K-Q@9; missed K-L@13	-0.0023	2796.26	4	16	1.1.1.1292.6	Winner
0	99	SETDENSGKQPSKLDEDDSCSLLTK	Propionamide(C)@20	missed K-Q@9; missed K-L@13	-0.0023	2796.26	4	13	1.1.1.1298.6	Winner
0	99	LDEDDSCSLLTK	Propionamide(C)@7		0.0007	1408.64	2	16	1.1.1.1380.6	Winner
2	99	QPSKLDEDDSCSLLTK	Trioxidation(C)@11	missed K-L@4	-0.0012	1825.82	2	13	1.1.1.1336.12	Winner
0	99	QPSKLDEDDSCSLLTK	Trioxidation(C)@11	missed K-L@4	-0.0012	1825.82	2	12	1.1.1.1325.8	Winner
0	99	QPSKLDEDDSCSLLTK	Trioxidation(C)@11	missed K-L@4	-0.0012	1825.82	2	15	1.1.1.1331.9	Winner
1.04	99	ETQIITGSDESCRKDLVK	Trioxidation(C)@12	missed R-K@13; missed K-D@14	-0.0009	2068.99	3	12	1.1.1.1253.5	Winner
0	99	ETQIITGSDESCR	Trioxidation(C)@12		-0.0013	1485.62	2	14	1.1.1.1160.8	Winner
0	99	ETQIITGSDESCR	Trioxidation(C)@12		-0.0013	1485.62	2	17	1.1.1.1165.9	Winner
0	99	ETQIITGSDESCR	Trioxidation(C)@12		-0.0013	1485.62	2	16	1.1.1.1170.12	Winner
0	99	ETQIITGSDESCRK	Trioxidation(C)@12	missed R-K@13	0.0013	1613.72	2	18	1.1.1.1062.6	Winner
0	99	ETQIITGSDESCRK	Trioxidation(C)@12	missed R-K@13	0.0013	1613.72	2	23	1.1.1.1067.4	Winner
0	99	ETQIITGSDESCRK	Trioxidation(C)@12	missed R-K@13	0.0013	1613.72	2	24	1.1.1.1072.4	Winner
0	99	ETQIITGSDESCRK	Trioxidation(C)@12	missed R-K@13	0.0013	1613.72	2	20	1.1.1.1077.5	Winner
0	99	ETQIITGSDESCRK	Trioxidation(C)@12	missed R-K@13	0.0013	1613.72	2	17	1.1.1.1083.4	Winner
0	99	ETQIITGSDESCR	Trioxidation(C)@12; Dimethyl(R)@13		-0.0176	1513.64	2	13	1.1.1.1228.5	Winner
0	99	ETQIITGSDESCR	Trioxidation(C)@12; Dimethyl(R)@13		-0.0176	1513.64	2	16	1.1.1.1233.5	Winner
0	99	ETQIITGSDESCRK	Trioxidation(C)@12; Formyl(K)@14	missed R-K@13	0.017	1641.73	3	12	1.1.1.1115.9	Winner
0	99	ETQIITGSDESCRK	Trioxidation(C)@12; Formyl(K)@14	missed R-K@13	0.017	1641.73	3	13	1.1.1.1121.8	Winner
2	99	SETDENSGKQPSKLDEDDSCSLLTK	Trioxidation(C)@20	missed K-Q@9; missed K-L@13	0.0018	2773.21	3	25	1.1.1.1283.10	Winner
0	99	SETDENSGKQPSKLDEDDSCSLLTK	Trioxidation(C)@20	missed K-Q@9; missed K-L@13	0.0018	2773.21	3	24	1.1.1.1289.8	Winner
0	99	SETDENSGKQPSKLDEDDSCSLLTK	Trioxidation(C)@20	missed K-Q@9; missed K-L@13	0.0018	2773.21	3	11	1.1.1.1297.7	Winner
2	99	ESSHNSSFELIGSTIPSYQPCNR	Trioxidation(C)@21		-0.0079	2600.14	3	29	1.1.1.1986.2	Winner
0	99	ESSHNSSFELIGSTIPSYQPCNR	Trioxidation(C)@21		-0.0037	2600.14	3	22	1.1.1.1974.3	Winner
0	99	PTCHGNAMALLK	Trioxidation(C)@3; Dioxidation(M)@8	cleaved R-P@N-term	-0.0028	1334.59	2	12	1.1.1.1201.11	Winner
0	99	PTCHGNAMALLK	Trioxidation(C)@3; Dioxidation(M)@8	cleaved R-P@N-term	-0.0005	1334.6	2	15	1.1.1.1206.9	Winner
0	99	PTCHGNAMALLK	Trioxidation(C)@3; Dioxidation(M)@8	cleaved R-P@N-term	-0.0028	1334.59	2	18	1.1.1.1211.8	Winner
2	99	PTCHGNAMALLK	Trioxidation(C)@3; Oxidation(M)@8	cleaved R-P@N-term	-0.0019	1318.6	2	20	1.1.1.1168.10	Winner
0	99	PTCHGNAMALLK	Trioxidation(C)@3; Oxidation(M)@8	cleaved R-P@N-term	-0.0011	1318.6	2	14	1.1.1.1158.9	Winner
0	99	PTCHGNAMALLK	Trioxidation(C)@3; Oxidation(M)@8	cleaved R-P@N-term	-0.0019	1318.6	2	19	1.1.1.1163.8	Winner
0	99	PTCHGNAMALLK	Trioxidation(C)@3; Oxidation(M)@8	cleaved R-P@N-term	-0.0019	1318.6	2	17	1.1.1.1174.9	Winner
0	99	PTCHGNAMALLK	Trioxidation(C)@3; Oxidation(M)@8	cleaved R-P@N-term	-0.0015	1318.6	2	16	1.1.1.1181.7	Winner
2	99	LDEDDSCSLLTK	Trioxidation(C)@7		0.0022	1385.59	2	18	1.1.1.1374.6	Winner
0	99	LDEDDSCSLLTK	Trioxidation(C)@7		0.0022	1385.59	2	17	1.1.1.1368.8	Winner
0	99	LDEDDSCSLLTK	Trioxidation(C)@7		0.0022	1385.59	2	16	1.1.1.1379.8	Winner

## Sheet: sicdc7
Contrib	Conf	Sequence	Modifications	Cleavages	∆Mass	Prec MW	z	Sc	Spectrum	Type
2	99	ETQIITGSDESCR	Cys->Dha(C)@12		-0.0006	1403.65	2	18	1.1.1.1039.11	Winner
0	99	ETQIITGSDESCR	Cys->Dha(C)@12		-0.0006	1403.65	2	15	1.1.1.1033.14	Winner
0	99	ETQIITGSDESCR	Cys->Dha(C)@12		-0.0006	1403.65	2	14	1.1.1.1045.12	Winner
0	99	ETQIITGSDESCRK	Cys->Dha(C)@12	missed R-K@13	0.0003	1531.75	3	15	1.1.1.941.4	Winner
0	99	ETQIITGSDESCRK	Cys->Dha(C)@12	missed R-K@13	0.0003	1531.75	3	14	1.1.1.946.5	Winner
0	98.1	ETQIITGSDESCRK	Cys->Dha(C)@12	missed R-K@13	0.0003	1531.75	3	12	1.1.1.931.7	Winner
0	98.1	ETQIITGSDESCRK	Cys->Dha(C)@12	missed R-K@13	0.0003	1531.75	3	12	1.1.1.934.8	Winner
0	98.1	ETQIITGSDESCRK	Cys->Dha(C)@12	missed R-K@13	0.0003	1531.75	3	12	1.1.1.936.6	Winner
0	65.6	ETQIITGSDESCRK	Cys->Dha(C)@12	missed R-K@13	0.0005	1531.75	3	8	1.1.1.951.6	Winner
0	99	NASRPMVIQESK	Deamidated(N)@1		-0.0003	1359.68	3	11	1.1.1.1047.6	Winner
0	99	NEELEIQEK	Deamidated(N)@1		0.0042	1131.53	2	10	1.1.1.1150.10	Winner
0	99	NEELEIQEK	Deamidated(N)@1		0.0042	1131.53	2	11	1.1.1.1156.9	Winner
0	99	NQYQALKPR	Deamidated(N)@1		0.0011	1117.59	2	10	1.1.1.968.6	Winner
0	99	NQYQALKPR	Deamidated(N)@1		-0.0017	1117.59	2	10	1.1.1.1017.10	Winner
0	99	NQYQALKPR	Deamidated(N)@1		-0.0001	1117.59	2	12	1.1.1.1023.12	Winner
0	98.1	NASRPMVIQESK	Deamidated(N)@1		-0.0003	1359.68	3	11	1.1.1.1041.3	Winner
0	97.2	NQYQALKPR	Deamidated(N)@1		-0.0005	1117.59	2	10	1.1.1.953.9	Winner
0	97.2	NQYQALKPR	Deamidated(N)@1		0.0013	1117.59	2	10	1.1.1.973.7	Winner
0	96.4	NQYQALKPR	Deamidated(N)@1		-0.0001	1117.59	2	11	1.1.1.1029.6	Winner
0	47.7	NQYQALKPR	Deamidated(N)@1		-0.0005	1117.59	2	8	1.1.1.958.7	Winner
0	19.6	NASRPMVIQESK	Deamidated(N)@1		-0.0051	1359.68	3	6	1.1.1.1004.6	Winner
0	97.1	NASRPMVIQESK	Deamidated(N)@1; Deamidated(R)@4; Oxidation(P)@5; Oxidation(M)@6		0.0107	1392.67	2	11	1.1.1.946.9	Winner
0	84.2	NASRPMVIQESK	Deamidated(N)@1; Deamidated(R)@4; Oxidation(P)@5; Oxidation(M)@6		0.0107	1392.67	2	9	1.1.1.951.11	Winner
2	99	NASRPMVIQESK	Deamidated(N)@1; Oxidation(M)@6		0.0023	1375.68	3	16	1.1.1.948.4	Winner
0	99	NASRPMVIQESK	Deamidated(N)@1; Oxidation(M)@6		0.002	1375.68	3	13	1.1.1.911.6	Winner
0	99	NASRPMVIQESK	Deamidated(N)@1; Oxidation(M)@6		0.0023	1375.68	3	15	1.1.1.938.4	Winner
0	99	NASRPMVIQESK	Deamidated(N)@1; Oxidation(M)@6		0.0023	1375.68	3	15	1.1.1.943.4	Winner
0	99	NASRPMVIQESK	Deamidated(N)@1; Oxidation(M)@6		0.0023	1375.68	3	14	1.1.1.953.3	Winner
0	99	FTSQDASTPASSELNKQEK	Deamidated(N)@15	missed K-Q@16	-0.001	2067.96	3	14	1.1.1.1102.8	Winner
0	99	TGSLLNQPK	Deamidated(N)@6		0.001	957.514	2	12	1.1.1.1034.5	Winner
0	99	TGSLLNQPK	Deamidated(N)@6		0.0008	957.514	2	12	1.1.1.1040.8	Winner
0	99	TGSLLNQPK	Deamidated(N)@6		0.0008	957.514	2	13	1.1.1.1051.5	Winner
0	64.3	TGSLLNQPK	Deamidated(N)@6		0.001	957.514	2	8	1.1.1.1071.6	Winner
0	98.3	NPFEAIRPGSAQQVK	Deamidated(Q)@13		-0.0008	1641.85	3	12	1.1.1.1308.2	Winner
0	20.3	NPFEAIRPGSAQQVK	Deamidated(Q)@13		-0.0008	1641.85	3	9	1.1.1.1314.2	Winner
0	88.7	NQYQALKPR	Deamidated(Q)@4		-0.0005	1117.59	2	9	1.1.1.948.9	Winner
2	99	TGSLLNQPK	Deamidated(Q)@7		0.0012	957.514	2	12	1.1.1.1066.7	Winner
0	99	NEELEIQEK	Deamidated(Q)@7		0.0042	1131.53	2	11	1.1.1.1110.10	Winner
0	99	NEELEIQEK	Deamidated(Q)@7		0.0042	1131.53	2	11	1.1.1.1115.13	Winner
0	99	TGSLLNQPK	Deamidated(Q)@7		0.0008	957.514	2	12	1.1.1.1046.4	Winner
0	99	TGSLLNQPK	Deamidated(Q)@7		0.0008	957.514	2	12	1.1.1.1056.4	Winner
0	99	TGSLLNQPK	Deamidated(Q)@7		0.0008	957.514	2	11	1.1.1.1061.5	Winner
0.03	35.3	ELEALKQR	Deamidated(Q)@7	missed K-Q@6	-0.0008	986.539	2	7	1.1.1.966.5	Winner
0	26.6	RGPSFMTSPSPK	Deamidated(R)@1; Oxidation(M)@6	missed R-G@1	0.017	1307.63	3	7	1.1.1.929.5	Winner
0	97.1	SSAVGPPEK	Delta:H(4)C(2)(K)@9		0.0007	898.477	2	10	1.1.1.966.4	Winner
0	87.2	SSAVGPPEK	Delta:H(4)C(2)(K)@9		0.0007	898.477	2	8	1.1.1.981.3	Winner
0	84.2	SSAVGPPEK	Delta:H(4)C(2)(K)@9		-0.0007	898.475	2	10	1.1.1.971.3	Winner
0	80.6	SSAVGPPEK	Delta:H(4)C(2)(K)@9		0.0007	898.477	2	9	1.1.1.976.3	Winner
0.02	98.6	VEEPEQQNK	Delta:H(4)C(2)@N-term		-0.0015	1127.54	2	10	1.1.1.843.6	Winner
0	80.6	VEEPEQQNK	Delta:H(4)C(2)@N-term		-0.0015	1127.54	2	11	1.1.1.855.4	Winner
0	65.6	VEEPEQQNK	Delta:H(4)C(2)@N-term		-0.0015	1127.54	2	10	1.1.1.849.5	Winner
0	99	MGYFPTEEK	Dioxidation(M)@1		0.0021	1132.48	2	11	1.1.1.1193.6	Winner
0	99	MGYFPTEEK	Dioxidation(M)@1		0.0021	1132.48	2	11	1.1.1.1199.6	Winner
0	97.1	MGYFPTEEK	Dioxidation(M)@1		0.0021	1132.48	2	10	1.1.1.1205.6	Winner
0	99	TVADSDESYMEK	Dioxidation(M)@10		-0.0002	1405.56	2	13	1.1.1.913.8	Winner
0	99	TVADSDESYMEK	Dioxidation(M)@10		-0.0002	1405.56	2	16	1.1.1.919.7	Winner
0	99	TVADSDESYMEK	Dioxidation(M)@10		-0.0002	1405.56	2	11	1.1.1.924.12	Winner
0	65.6	PMVIQESK	Dioxidation(M)@2	cleaved R-P@N-term	-0.0015	962.473	2	8	1.1.1.873.4	Winner
0	51.8	DMGTDGKEELK	Dioxidation(M)@2	missed K-E@7	-0.0027	1253.54	3	9	1.1.1.800.3	Winner
0	87.2	DEKEMDKENNDGSSEIGK	Dioxidation(M)@5	missed K-E@3; missed K-E@7	-0.0001	2055.85	4	11	1.1.1.795.6	Winner
0	99	RGPSFMTSPSPK	Dioxidation(M)@6	missed R-G@1	-0.0009	1322.63	3	11	1.1.1.961.4	Winner
0	99	RGPSFMTSPSPK	Dioxidation(M)@6	missed R-G@1	-0.0009	1322.63	3	12	1.1.1.966.3	Winner
0	99	PMVIQESK	Formyl@N-term	cleaved R-P@N-term	0.0001	958.48	2	12	1.1.1.889.6	Winner
0	99	PTCHGNAMALLK	Formyl@N-term; Dioxidation(C)@3; Oxidation(M)@8	cleaved R-P@N-term	0.001	1330.6	2	15	1.1.1.1106.7	Winner
0	99	PTCHGNAMALLK	Formyl@N-term; Dioxidation(C)@3; Oxidation(M)@8	cleaved R-P@N-term	0.001	1330.6	2	15	1.1.1.1111.7	Winner
2	99	QLHSETQR	Gln->pyro-Glu@N-term		-0.0002	980.467	2	12	1.1.1.830.4	Winner
0	99	QLHSETQR	Gln->pyro-Glu@N-term		-0.0002	980.467	2	12	1.1.1.812.3	Winner
0	99	QLHSETQR	Gln->pyro-Glu@N-term		-0.0002	980.467	2	12	1.1.1.818.2	Winner
0	99	QLHSETQR	Gln->pyro-Glu@N-term		-0.0002	980.467	2	12	1.1.1.824.3	Winner
0	96.2	QLHSETQR	Gln->pyro-Glu@N-term		-0.0002	980.467	2	9	1.1.1.836.5	Winner
0	93.2	QYQALKPR	Gln->pyro-Glu@N-term	cleaved N-Q@N-term	0.0028	985.537	2	9	1.1.1.912.7	Winner
0	22.3	QLHSETQR	Gln->pyro-Glu@N-term		-0.003	980.465	2	6	1.1.1.844.6	Winner
2	99	MGYFPTEEKSETDENSGK	Oxidation(M)@1	missed K-S@9	0.0019	2063.86	3	17	1.1.1.1100.6	Winner
0	99	MGYFPTEEK	Oxidation(M)@1		0.0006	1116.48	2	11	1.1.1.1153.8	Winner
0	99	MGYFPTEEK	Oxidation(M)@1		0.0007	1116.48	2	14	1.1.1.1159.6	Winner
0	99	MGYFPTEEK	Oxidation(M)@1		0.001	1116.48	2	13	1.1.1.1165.7	Winner
0	99	MGYFPTEEK	Oxidation(M)@1		0.001	1116.48	2	14	1.1.1.1171.9	Winner
0	99	MGYFPTEEK	Oxidation(M)@1		0.001	1116.48	2	14	1.1.1.1177.7	Winner
0	99	MGYFPTEEK	Oxidation(M)@1		0.0006	1116.48	2	13	1.1.1.1183.6	Winner
0	99	MGYFPTEEK	Oxidation(M)@1		0.001	1116.48	2	12	1.1.1.1189.6	Winner
0	99	MGYFPTEEK	Oxidation(M)@1		0.001	1116.48	2	12	1.1.1.1195.4	Winner
0	99	MGYFPTEEKSETDENSGK	Oxidation(M)@1	missed K-S@9	0.0019	2063.86	3	19	1.1.1.1106.8	Winner
0	88.5	MGYFPTEEK	Oxidation(M)@1		0.0006	1116.48	2	8	1.1.1.1201.6	Winner
0	88.5	MGYFPTEEK	Oxidation(M)@1		0.0018	1116.48	2	7	1.1.1.1218.6	Winner
2	99	ESALNLPYHMPENK	Oxidation(M)@10		0.0003	1657.78	3	16	1.1.1.1266.4	Winner
0	99	ESALNLPYHMPENK	Oxidation(M)@10		0.0003	1657.78	3	17	1.1.1.1261.5	Winner
0	99	ESALNLPYHMPENK	Oxidation(M)@10		0.0003	1657.78	3	16	1.1.1.1271.7	Winner
0	99	TVADSDESYMEK	Oxidation(M)@10		-0.0003	1389.56	2	14	1.1.1.881.4	Winner
0	99	TVADSDESYMEK	Oxidation(M)@10		-0.0003	1389.56	2	11	1.1.1.886.6	Winner
0	99	TVADSDESYMEK	Oxidation(M)@10		0.0019	1389.56	2	12	1.1.1.891.6	Winner
0	99	TVADSDESYMEK	Oxidation(M)@10		0.0019	1389.56	2	21	1.1.1.896.6	Winner
0	99	TVADSDESYMEK	Oxidation(M)@10		0.0019	1389.56	2	21	1.1.1.901.8	Winner
0	99	TVADSDESYMEK	Oxidation(M)@10		0.0019	1389.56	2	21	1.1.1.907.9	Winner
0	99	TVADSDESYMEK	Oxidation(M)@10		0.0019	1389.56	2	21	1.1.1.913.7	Winner
0	99	TVADSDESYMEK	Oxidation(M)@10		0.0019	1389.56	2	17	1.1.1.919.6	Winner
0	99	TVADSDESYMEK	Oxidation(M)@10		0	1389.56	2	11	1.1.1.924.11	Winner
0	99	TVADSDESYMEK	Oxidation(M)@10		-0.0003	1389.56	2	10	1.1.1.931.10	Winner
0	98.9	ESALNLPYHMPENK	Oxidation(M)@10		-0.0017	1657.78	3	11	1.1.1.1256.7	Winner
0	97.2	ESALNLPYHMPENK	Oxidation(M)@10		-0.0017	1657.78	3	11	1.1.1.1282.7	Winner
0	96	ESALNLPYHMPENK	Oxidation(M)@10		0.0003	1657.78	3	11	1.1.1.1276.6	Winner
0	99	TVADSDESYMEK	Oxidation(M)@10; Delta:H(4)C(2)(K)@12		0.0026	1417.59	2	10	1.1.1.1064.11	Winner
0	99	TVADSDESYMEK	Oxidation(M)@10; Delta:H(4)C(2)(K)@12		0.0026	1417.59	2	12	1.1.1.1070.6	Winner
2	99	EIIDTANTTEMNSDHHSK	Oxidation(M)@11		-0.0015	2057.89	4	16	1.1.1.938.6	Winner
0	99	EIIDTANTTEMNSDHHSK	Oxidation(M)@11		0.0009	2057.9	4	15	1.1.1.923.10	Winner
0	99	EIIDTANTTEMNSDHHSK	Oxidation(M)@11		-0.0015	2057.89	4	19	1.1.1.928.9	Winner
0	99	EIIDTANTTEMNSDHHSK	Oxidation(M)@11		-0.0015	2057.89	4	18	1.1.1.933.7	Winner
0	99	EIIDTANTTEMNSDHHSK	Oxidation(M)@11; Deamidated(N)@12		0.0045	2058.88	4	15	1.1.1.943.7	Winner
0	99	EIIDTANTTEMNSDHHSK	Oxidation(M)@11; Deamidated(N)@12		-0.0005	2058.88	3	16	1.1.1.945.7	Winner
0	86.5	EIIDTANTTEMNSDHHSK	Oxidation(M)@11; Deamidated(N)@12		0.0045	2058.88	4	11	1.1.1.950.6	Winner
0	85.6	EIIDTANTTEMNSDHHSK	Oxidation(M)@11; Deamidated(N)@12		0.0045	2058.88	4	11	1.1.1.948.7	Winner
0	41.5	EIIDTANTTEMNSDHHSK	Oxidation(M)@11; Deamidated(N)@12		0.0005	2058.88	4	10	1.1.1.958.6	Winner
0	39.4	EIIDTANTTEMNSDHHSK	Oxidation(M)@11; Deamidated(N)@12		0.0013	2058.88	4	10	1.1.1.955.6	Winner
0	18.8	EIIDTANTTEMNSDHHSK	Oxidation(M)@11; Deamidated(N)@12		0.0045	2058.88	4	9	1.1.1.953.7	Winner
2	99	DMGTDGKEELK	Oxidation(M)@2	missed K-E@7	-0.0009	1237.55	3	13	1.1.1.787.2	Winner
2	99	DMGTDGKEELKADVVPVTLAPK	Oxidation(M)@2	missed K-E@7; missed K-A@11	-0.0044	2328.18	4	19	1.1.1.1489.2	Winner
2	99	EMDKENNDGSSEIGK	Oxidation(M)@2	missed K-E@4	-0.0034	1667.69	3	16	1.1.1.769.2	Winner
2	99	PMVIQESK	Oxidation(M)@2	cleaved R-P@N-term	0.0003	946.48	2	13	1.1.1.847.8	Winner
0	99	DMGTDGKEELK	Oxidation(M)@2	missed K-E@7	-0.0009	1237.55	3	13	1.1.1.781.2	Winner
0	99	EMDKENNDGSSEIGK	Oxidation(M)@2	missed K-E@4	-0.0032	1667.69	3	18	1.1.1.759.2	Winner
0	99	PMVIQESK	Oxidation(M)@2	cleaved R-P@N-term	0.0003	946.48	2	9	1.1.1.829.6	Winner
0	99	PMVIQESK	Oxidation(M)@2	cleaved R-P@N-term	0.0003	946.48	2	13	1.1.1.835.5	Winner
0	99	PMVIQESK	Oxidation(M)@2	cleaved R-P@N-term	0.0003	946.48	2	13	1.1.1.841.3	Winner
0	97.2	DMGTDGKEELK	Oxidation(M)@2	missed K-E@7	-0.0009	1237.55	3	11	1.1.1.793.2	Winner
0	96.1	EMDKENNDGSSEIGK	Oxidation(M)@2	missed K-E@4	-0.0034	1667.69	3	11	1.1.1.776.5	Winner
0	94.1	PMVIQESK	Oxidation(M)@2	cleaved R-P@N-term	-0.0016	946.478	2	8	1.1.1.853.8	Winner
0	82.9	DMGTDGKEELK	Oxidation(M)@2	missed K-E@7	-0.0009	1237.55	3	8	1.1.1.800.2	Winner
0	71.4	PMVIQESK	Oxidation(M)@2	cleaved R-P@N-term	-0.0281	946.451	2	8	1.1.1.860.4	Winner
0	65.6	PMVIQESK	Oxidation(M)@2	cleaved R-P@N-term	-0.0285	946.451	2	7	1.1.1.866.4	Winner
0	99	EMDKENNDGSSEIGK	Oxidation(M)@2; Deamidated(N)@7	missed K-E@4	-0.0009	1668.68	3	13	1.1.1.787.5	Winner
0	58.6	EMDKENNDGSSEIGK	Oxidation(M)@2; Deamidated(N)@7	missed K-E@4	-0.0009	1668.68	3	10	1.1.1.793.4	Winner
2	99	ENMEELLNLCSGK	Oxidation(M)@3; Trioxidation(C)@10		-0.0026	1542.65	2	21	1.1.1.1524.3	Winner
0	99	ENMEELLNLCSGK	Oxidation(M)@3; Trioxidation(C)@10		-0.0031	1542.65	2	20	1.1.1.1512.2	Winner
0	99	ENMEELLNLCSGK	Oxidation(M)@3; Trioxidation(C)@10		-0.0026	1542.65	2	18	1.1.1.1518.3	Winner
1.68	99	SRPMVIQESK	Oxidation(M)@4	cleaved A-S@N-term	-0.0025	1189.61	2	14	1.1.1.858.5	Winner
0	99	SRPMVIQESK	Oxidation(M)@4	cleaved A-S@N-term	-0.0025	1189.61	2	12	1.1.1.864.9	Winner
2	99	DEKEMDKENNDGSSEIGK	Oxidation(M)@5	missed K-E@3; missed K-E@7	-0.0039	2039.86	4	17	1.1.1.797.2	Winner
0	99	DEKEMDKENNDGSSEIGK	Oxidation(M)@5	missed K-E@3; missed K-E@7	-0.0034	2039.86	4	15	1.1.1.779.2	Winner
0	99	DEKEMDKENNDGSSEIGK	Oxidation(M)@5	missed K-E@3; missed K-E@7	-0.0034	2039.86	4	20	1.1.1.785.2	Winner
0	99	DEKEMDKENNDGSSEIGK	Oxidation(M)@5	missed K-E@3; missed K-E@7	-0.0034	2039.86	4	19	1.1.1.791.2	Winner
0	99	GPSFMTSPSPK	Oxidation(M)@5		-0.001	1150.53	2	18	1.1.1.999.3	Winner
0	99	GPSFMTSPSPK	Oxidation(M)@5		-0.001	1150.53	2	19	1.1.1.1005.7	Winner
0	99	GPSFMTSPSPK	Oxidation(M)@5		-0.001	1150.53	2	18	1.1.1.1011.10	Winner
0	99	GPSFMTSPSPK	Oxidation(M)@5		-0.001	1150.53	2	16	1.1.1.1016.11	Winner
0	99	GPSFMTSPSPK	Oxidation(M)@5		-0.0009	1150.53	2	14	1.1.1.1022.12	Winner
0	99	GPSFMTSPSPK	Oxidation(M)@5		-0.0009	1150.53	2	11	1.1.1.1028.10	Winner
0.67	98.3	ASRPMVIQESK	Oxidation(M)@5	cleaved N-A@N-term	0.0003	1260.65	3	11	1.1.1.850.2	Winner
0	71.4	ASRPMVIQESK	Oxidation(M)@5	cleaved N-A@N-term	0.0003	1260.65	3	8	1.1.1.844.2	Winner
0	29.4	GPSFMTSPSPK	Oxidation(M)@5		-0.0009	1150.53	2	6	1.1.1.993.4	Winner
0	99	DEKEMDKENNDGSSEIGK	Oxidation(M)@5; Deamidated(N)@10	missed K-E@3; missed K-E@7	0.001	2040.84	4	17	1.1.1.804.3	Winner
0	99	DEKEMDKENNDGSSEIGK	Oxidation(M)@5; Deamidated(N)@9	missed K-E@3; missed K-E@7	-0.0038	2040.84	3	15	1.1.1.801.9	Winner
0	99	DEKEMDKENNDGSSEIGK	Oxidation(M)@5; Deamidated(N)@9	missed K-E@3; missed K-E@7	-0.0036	2040.84	3	13	1.1.1.807.7	Winner
0	94.4	GPSFMTSPSPK	Oxidation(M)@5; Phospho(S)@9		0.0033	1230.5	2	9	1.1.1.1213.8	Winner
2	99	RGPSFMTSPSPK	Oxidation(M)@6	missed R-G@1	0.0006	1306.63	3	15	1.1.1.939.5	Winner
0	99	NASRPMVIQESK	Oxidation(M)@6		0.0012	1374.69	3	12	1.1.1.853.6	Winner
0	99	NASRPMVIQESK	Oxidation(M)@6		0.0012	1374.69	3	14	1.1.1.859.5	Winner
0	99	NASRPMVIQESK	Oxidation(M)@6		0.0012	1374.69	3	14	1.1.1.865.5	Winner
0	99	NASRPMVIQESK	Oxidation(M)@6		0.0012	1374.69	3	14	1.1.1.871.4	Winner
0	99	NASRPMVIQESK	Oxidation(M)@6		-0.0009	1374.69	3	13	1.1.1.877.2	Winner
0	99	RGPSFMTSPSPK	Oxidation(M)@6	missed R-G@1	0.0006	1306.63	3	14	1.1.1.934.6	Winner
0	99	RGPSFMTSPSPK	Oxidation(M)@6	missed R-G@1	0.0006	1306.63	3	14	1.1.1.944.4	Winner
0	99	RGPSFMTSPSPK	Oxidation(M)@6	missed R-G@1	-0.0001	1306.63	3	13	1.1.1.949.3	Winner
0	99	RGPSFMTSPSPK	Oxidation(M)@6	missed R-G@1	0.0011	1306.64	3	12	1.1.1.954.3	Winner
0	96.5	NASRPMVIQESK	Oxidation(M)@6		-0.0016	1374.69	3	11	1.1.1.893.4	Winner
0	98.4	NASRPMVIQESK	Oxidation(M)@6; Deamidated(Q)@9		0.0026	1375.68	3	12	1.1.1.883.5	Winner
0	92.5	NASRPMVIQESK	Oxidation(M)@6; Deamidated(Q)@9		0.0026	1375.68	3	11	1.1.1.888.5	Winner
2	99	KRGPSFMTSPSPK	Oxidation(M)@7	missed K-R@1; missed R-G@2	-0.0007	1434.73	3	13	1.1.1.848.4	Winner
0	96.4	KRGPSFMTSPSPK	Oxidation(M)@7	missed K-R@1; missed R-G@2	-0.0007	1434.73	3	11	1.1.1.842.4	Winner
0	18	KRGPSFMTSPSPK	Oxidation(M)@7	missed K-R@1; missed R-G@2	-0.0007	1434.73	3	7	1.1.1.854.4	Winner
2	99	NIDDASQMDLFHR	Oxidation(M)@8		-0.0028	1576.69	3	10	1.1.1.1288.8	Winner
0	97.8	NIDDASQMDLFHR	Oxidation(M)@8		-0.0024	1576.69	3	10	1.1.1.1276.4	Winner
0	93.7	NIDDASQMDLFHR	Oxidation(M)@8		-0.0028	1576.69	3	10	1.1.1.1282.5	Winner
0.02	96.8	KPRPTCHGNAMALLK	Oxidation(P)@4; Dioxidation(C)@6; Oxidation(M)@11		-0.0012	1699.85	3	10	1.1.1.929.10	Winner
0	51.8	KPRPTCHGNAMALLK	Oxidation(P)@4; Dioxidation(C)@6; Oxidation(M)@11		-0.0012	1699.85	3	8	1.1.1.924.8	Winner
0	98.1	NASRPMVIQESK	Oxidation(P)@5; Oxidation(M)@6		-0.0007	1390.69	3	12	1.1.1.889.5	Winner
0	43.8	NASRPMVIQESK	Oxidation(P)@5; Oxidation(M)@6		-0.0007	1390.69	3	9	1.1.1.884.4	Winner
2	99	SPSPGLFR	Phospho(S)@3		0.0006	939.422	2	12	1.1.1.1739.2	Winner
0	99	SPSPGLFR	Phospho(S)@3		-0.0012	939.42	2	11	1.1.1.1391.2	Winner
0	99	SPSPGLFR	Phospho(S)@3		-0.0014	939.42	2	11	1.1.1.1403.2	Winner
0	99	SPSPGLFR	Phospho(S)@3		-0.0014	939.42	2	12	1.1.1.1408.2	Winner
0	99	SPSPGLFR	Phospho(S)@3		-0.0014	939.42	2	12	1.1.1.1418.2	Winner
0	99	SPSPGLFR	Phospho(S)@3		-0.0014	939.42	2	12	1.1.1.1423.2	Winner
0	99	SPSPGLFR	Phospho(S)@3		-0.0016	939.42	2	11	1.1.1.1428.2	Winner
0	99	SPSPGLFR	Phospho(S)@3		-0.0018	939.42	2	12	1.1.1.1434.2	Winner
0	99	SPSPGLFR	Phospho(S)@3		-0.0018	939.42	2	12	1.1.1.1441.2	Winner
0	99	SPSPGLFR	Phospho(S)@3		-0.002	939.419	2	11	1.1.1.1473.2	Winner
0	99	SPSPGLFR	Phospho(S)@3		0.0002	939.422	2	12	1.1.1.1491.2	Winner
0	99	SPSPGLFR	Phospho(S)@3		-0.0016	939.42	2	12	1.1.1.1499.2	Winner
0	99	SPSPGLFR	Phospho(S)@3		-0.0018	939.42	2	11	1.1.1.1505.2	Winner
0	99	SPSPGLFR	Phospho(S)@3		-0.0018	939.42	2	12	1.1.1.1510.2	Winner
0	99	SPSPGLFR	Phospho(S)@3		-0.0016	939.42	2	11	1.1.1.1538.2	Winner
0	99	SPSPGLFR	Phospho(S)@3		-0.0012	939.42	2	11	1.1.1.1544.2	Winner
0	99	SPSPGLFR	Phospho(S)@3		0.0006	939.422	2	11	1.1.1.1560.2	Winner
0	99	SPSPGLFR	Phospho(S)@3		-0.0018	939.42	2	11	1.1.1.1582.2	Winner
0	99	SPSPGLFR	Phospho(S)@3		0.0004	939.422	2	12	1.1.1.1603.2	Winner
0	99	SPSPGLFR	Phospho(S)@3		-0.002	939.419	2	11	1.1.1.1633.2	Winner
0	99	SPSPGLFR	Phospho(S)@3		-0.0016	939.42	2	11	1.1.1.1697.2	Winner
0	99	SPSPGLFR	Phospho(S)@3		0.0008	939.422	2	11	1.1.1.1794.2	Winner
0	99	SPSPGLFR	Phospho(S)@3		0.0006	939.422	2	11	1.1.1.1821.2	Winner
0	99	SPSPGLFR	Phospho(S)@3		0.0008	939.422	2	10	1.1.1.1838.2	Winner
0	99	SPSPGLFR	Phospho(S)@3		0.0006	939.422	2	10	1.1.1.1920.2	Winner
0	99	SPSPGLFR	Phospho(S)@3		0.0008	939.422	2	10	1.1.1.1938.2	Winner
0	98.9	SPSPGLFR	Phospho(S)@3		-0.0016	939.42	2	11	1.1.1.1450.2	Winner
0	98.9	SPSPGLFR	Phospho(S)@3		0.0004	939.422	2	11	1.1.1.1528.2	Winner
0	98.9	SPSPGLFR	Phospho(S)@3		-0.0018	939.42	2	10	1.1.1.1854.2	Winner
0	98.5	SPSPGLFR	Phospho(S)@3		-0.0014	939.42	2	10	1.1.1.1522.2	Winner
0	98.4	SPSPGLFR	Phospho(S)@3		-0.0018	939.42	2	10	1.1.1.1718.2	Winner
0	98.3	SPSPGLFR	Phospho(S)@3		-0.0014	939.42	2	11	1.1.1.1396.2	Winner
0	98.3	SPSPGLFR	Phospho(S)@3		-0.0018	939.42	2	11	1.1.1.1456.2	Winner
0	98.3	SPSPGLFR	Phospho(S)@3		0.0008	939.422	2	10	1.1.1.1670.2	Winner
0	96.6	SPSPGLFR	Phospho(S)@3		-0.0012	939.42	2	10	1.1.1.1617.2	Winner
0	96.3	SPSPGLFR	Phospho(S)@3		0.0002	939.422	2	9	1.1.1.2006.2	Winner
0	96	SPSPGLFR	Phospho(S)@3		-0.001	939.42	2	9	1.1.1.1985.2	Winner
0	95.9	SPSPGLFR	Phospho(S)@3		0.0002	939.422	2	10	1.1.1.1649.2	Winner
0	95.3	SPSPGLFR	Phospho(S)@3		-0.0018	939.42	2	10	1.1.1.1516.2	Winner
0	95.2	SPSPGLFR	Phospho(S)@3		0.0006	939.422	2	9	1.1.1.1961.2	Winner
0	94.4	SPSPGLFR	Phospho(S)@3		0.0006	939.422	2	9	1.1.1.1898.2	Winner
0	93.5	SPSPGLFR	Phospho(S)@3		-0.0014	939.42	2	9	1.1.1.1383.2	Winner
0	92.6	SPSPGLFR	Phospho(S)@3		-0.0012	939.42	2	9	1.1.1.1766.2	Winner
0	91	SPSPGLFR	Phospho(S)@3		0.0008	939.422	2	9	1.1.1.1875.2	Winner
0	43.4	SPSPGLFR	Phospho(S)@3		-0.0018	939.42	2	7	1.1.1.1377.2	Winner
0	24.9	PTCHGNAMALLK	Phospho(T)@2	cleaved R-P@N-term	0.0099	1334.6	2	6	1.1.1.1110.11	Winner
0.43	63.1	RFTLDR	Phospho(T)@3	missed R-F@1	0.0115	886.418	2	7	1.1.1.1091.6	Winner
0	46.8	RFTLDR	Phospho(T)@3	missed R-F@1	0.0179	886.424	2	8	1.1.1.1097.5	Winner
0	99	ETQIITGSDESCR	Propionamide(C)@12		0.0015	1508.68	2	13	1.1.1.1047.13	Winner
0	99	ETQIITGSDESCR	Propionamide(C)@12		0.0015	1508.68	2	18	1.1.1.1052.11	Winner
0	99	ETQIITGSDESCR	Propionamide(C)@12		0.0015	1508.68	2	15	1.1.1.1057.12	Winner
0	99	ETQIITGSDESCRK	Propionamide(C)@12	missed R-K@13	-0.0001	1636.77	3	13	1.1.1.942.5	Winner
0	99	ETQIITGSDESCRK	Propionamide(C)@12	missed R-K@13	-0.0001	1636.77	3	14	1.1.1.947.6	Winner
0	99	ETQIITGSDESCRK	Propionamide(C)@12	missed R-K@13	-0.0001	1636.77	3	15	1.1.1.952.9	Winner
0	99	ETQIITGSDESCRK	Propionamide(C)@12	missed R-K@13	-0.0001	1636.77	3	15	1.1.1.957.9	Winner
2	99	ETQIITGSDESCRK	Trioxidation(C)@12	missed R-K@13	0.0028	1613.72	2	22	1.1.1.977.7	Winner
0	99	ETQIITGSDESCR	Trioxidation(C)@12		0.0002	1485.63	2	13	1.1.1.1064.12	Winner
0	99	ETQIITGSDESCR	Trioxidation(C)@12		0.0002	1485.63	2	14	1.1.1.1069.12	Winner
0	99	ETQIITGSDESCRK	Trioxidation(C)@12	missed R-K@13	0.0028	1613.72	2	18	1.1.1.967.5	Winner
0	99	ETQIITGSDESCRK	Trioxidation(C)@12	missed R-K@13	0.0028	1613.72	2	23	1.1.1.972.5	Winner
0	99	ETQIITGSDESCRK	Trioxidation(C)@12	missed R-K@13	0.0028	1613.72	2	16	1.1.1.982.5	Winner
0	99	ETQIITGSDESCR	Trioxidation(C)@12; Dimethyl(R)@13		-0.0167	1513.64	2	13	1.1.1.1136.6	Winner
0	99	ETQIITGSDESCR	Trioxidation(C)@12; Dimethyl(R)@13		-0.0167	1513.64	2	15	1.1.1.1141.8	Winner
0	94.5	ETQIITGSDESCRK	Trioxidation(C)@12; Formyl(K)@14	missed R-K@13	0.0166	1641.73	3	12	1.1.1.1014.7	Winner
0	98.5	PTCHGNAMALLK	Trioxidation(C)@3; Dioxidation(M)@8	cleaved R-P@N-term	0.0016	1334.6	2	10	1.1.1.1115.15	Winner
2	99	PTCHGNAMALLK	Trioxidation(C)@3; Oxidation(M)@8	cleaved R-P@N-term	0	1318.6	2	21	1.1.1.1072.9	Winner
0	99	PTCHGNAMALLK	Trioxidation(C)@3; Oxidation(M)@8	cleaved R-P@N-term	-0.0003	1318.6	2	17	1.1.1.1062.8	Winner
0	99	PTCHGNAMALLK	Trioxidation(C)@3; Oxidation(M)@8	cleaved R-P@N-term	0	1318.6	2	18	1.1.1.1067.8	Winner
0	99	PTCHGNAMALLK	Trioxidation(C)@3; Oxidation(M)@8	cleaved R-P@N-term	0	1318.6	2	16	1.1.1.1078.14	Winner
0	97.1	PTCHGNAMALLK	Trioxidation(C)@3; Oxidation(M)@8	cleaved R-P@N-term	0.0006	1318.6	2	9	1.1.1.1084.17	Winner

## Sheet: hu
Contrib	Conf	Sequence	Modifications	Cleavages	∆Mass	Prec MW	z	Sc	Spectrum	Type
2	99	NQEDDVEQPFNDSG	Amidated@C-term	cleaved G-C@C-term	-0.0026	1591.64	2	20	1.1.1.1291.7	Winner
0	99	ETQIITGSDESCR	Carboxy(E)@10; Dioxidation(C)@12		0.0201	1513.64	2	13	1.1.1.1184.8	Winner
2	99	ETQIITGSDESCR	Cys->Dha(C)@12		0.0018	1403.65	2	17	1.1.1.1084.11	Winner
0	99	ETQIITGSDESCR	Cys->Dha(C)@12		0.0018	1403.65	2	17	1.1.1.1072.7	Winner
0	99	ETQIITGSDESCR	Cys->Dha(C)@12		0.0018	1403.65	2	21	1.1.1.1078.9	Winner
0	99	ETQIITGSDESCRK	Cys->Dha(C)@12	missed R-K@13	0.0008	1531.75	3	14	1.1.1.976.4	Winner
0	99	ETQIITGSDESCRK	Cys->Dha(C)@12	missed R-K@13	0.0008	1531.75	3	14	1.1.1.982.6	Winner
0	98.5	ETQIITGSDESCRK	Cys->Dha(C)@12	missed R-K@13	0.0008	1531.75	3	13	1.1.1.977.5	Winner
0	98.5	ETQIITGSDESCRK	Cys->Dha(C)@12	missed R-K@13	0.0008	1531.75	3	13	1.1.1.987.7	Winner
0	88.7	ETQIITGSDESCRK	Cys->Dha(C)@12	missed R-K@13	0.0008	1531.75	3	10	1.1.1.970.5	Winner
0	88.7	ETQIITGSDESCRK	Cys->Dha(C)@12	missed R-K@13	0.0005	1531.75	3	10	1.1.1.992.7	Winner
0	77.7	PTCHGNAMALLK	Cys->Dha(C)@3; Oxidation(M)@8	cleaved R-P@N-term	-0.0003	1236.63	3	10	1.1.1.1018.2	Winner
0	52	PTCHGNAMALLK	Cys->Dha(C)@3; Oxidation(M)@8	cleaved R-P@N-term	-0.0003	1236.63	3	9	1.1.1.1012.2	Winner
0	99	NASRPMVIQESK	Deamidated(N)@1		-0.0012	1359.68	3	14	1.1.1.1043.2	Winner
0	99	NASRPMVIQESK	Deamidated(N)@1		-0.0003	1359.68	3	15	1.1.1.1083.5	Winner
0	99	NASRPMVIQESK	Deamidated(N)@1		-0.0003	1359.68	3	15	1.1.1.1088.4	Winner
0	99	NEELEIQEK	Deamidated(N)@1		0.0034	1131.53	2	13	1.1.1.1190.6	Winner
0	99	NEELEIQEK	Deamidated(N)@1		0.0043	1131.53	2	13	1.1.1.1196.5	Winner
0	99	NQYQALKPR	Deamidated(N)@1		0	1117.59	2	12	1.1.1.1013.6	Winner
0	99	NQYQALKPR	Deamidated(N)@1		-0.0009	1117.59	2	11	1.1.1.1057.9	Winner
0	99	NQYQALKPR	Deamidated(N)@1		-0.0011	1117.59	2	14	1.1.1.1063.11	Winner
0	99	NQYQALKPR	Deamidated(N)@1		-0.0011	1117.59	2	13	1.1.1.1069.12	Winner
0	97.3	NASRPMVIQESK	Deamidated(N)@1		-0.0024	1359.68	3	11	1.1.1.1049.2	Winner
0	95.3	NQYQALKPR	Deamidated(N)@1		0	1117.59	2	10	1.1.1.1007.7	Winner
0	86.4	NASRPMVIQESK	Deamidated(N)@1		-0.0003	1359.68	3	9	1.1.1.1077.5	Winner
0	82.6	NQYQALKPR	Deamidated(N)@1		0	1117.59	2	8	1.1.1.1002.8	Winner
0	70.5	NQYQALKPR	Deamidated(N)@1		-0.0003	1117.59	2	9	1.1.1.987.9	Winner
0	56.2	NQYQALKPR	Deamidated(N)@1		-0.0011	1117.59	2	7	1.1.1.1075.13	Winner
0	34.4	NEELEIQEK	Deamidated(N)@1		0.0006	1131.53	2	8	1.1.1.1203.7	Winner
0	98.5	NASRPMVIQESK	Deamidated(N)@1; Deamidated(R)@4; Oxidation(P)@5; Oxidation(M)@6		0.011	1392.67	2	11	1.1.1.993.11	Winner
0	96.4	NASRPMVIQESK	Deamidated(N)@1; Deamidated(R)@4; Oxidation(P)@5; Oxidation(M)@6		0.011	1392.67	2	11	1.1.1.983.8	Winner
0	91	NASRPMVIQESK	Deamidated(N)@1; Deamidated(R)@4; Oxidation(P)@5; Oxidation(M)@6		0.011	1392.67	2	11	1.1.1.988.10	Winner
0	99	NASRPMVIQESK	Deamidated(N)@1; Oxidation(M)@6		-0.0005	1375.68	3	14	1.1.1.954.3	Winner
0	99	NASRPMVIQESK	Deamidated(N)@1; Oxidation(M)@6		-0.0005	1375.68	3	13	1.1.1.960.4	Winner
0	99	NASRPMVIQESK	Deamidated(N)@1; Oxidation(M)@6		0.0026	1375.68	3	16	1.1.1.976.3	Winner
0	99	NASRPMVIQESK	Deamidated(N)@1; Oxidation(M)@6		0.0026	1375.68	3	18	1.1.1.982.4	Winner
0	99	NASRPMVIQESK	Deamidated(N)@1; Oxidation(M)@6		0.0026	1375.68	3	16	1.1.1.987.4	Winner
0	99	NASRPMVIQESK	Deamidated(N)@1; Oxidation(M)@6		0.0026	1375.68	3	15	1.1.1.992.5	Winner
0	97.9	NASRPMVIQESK	Deamidated(N)@1; Oxidation(M)@6		0.0023	1375.68	3	12	1.1.1.997.3	Winner
0	77.7	NASRPMVIQESK	Deamidated(N)@1; Oxidation(P)@5; Deamidated(Q)@9		0.007	1376.67	3	11	1.1.1.1007.4	Winner
0	52	NASRPMVIQESK	Deamidated(N)@1; Oxidation(P)@5; Oxidation(M)@6		0.0007	1391.67	3	8	1.1.1.1010.6	Winner
0	99	GSEQTTGAENEVETNALPVVSK	Deamidated(N)@10		-0.0013	2260.07	3	25	1.1.1.1401.2	Winner
0	99	GSEQTTGAENEVETNALPVVSK	Deamidated(N)@15		-0.005	2260.07	3	25	1.1.1.1408.2	Winner
0	99	GSEQTTGAENEVETNALPVVSK	Deamidated(N)@15		-0.005	2260.07	3	26	1.1.1.1413.3	Winner
0	99	TGSLLNQPK	Deamidated(N)@6		0.0031	957.516	2	12	1.1.1.1075.7	Winner
0	74.3	EMDKENNDGSSEIGK	Deamidated(N)@7	missed K-E@4	-0.0063	1652.68	3	10	1.1.1.904.7	Winner
0	99	EIIDTANTTEMNSDHHSK	Deamidated(N)@7; Oxidation(M)@11		-0.0002	2058.88	4	13	1.1.1.1003.6	Winner
0	97.4	NPFEAIRPGSAQQVK	Deamidated(Q)@13		-0.0003	1641.85	3	12	1.1.1.1338.6	Winner
0	92.9	ETQIITGSDESCRK	Deamidated(Q)@3; Cys->Dha(C)@12	missed R-K@13	0.0022	1532.73	3	10	1.1.1.1002.5	Winner
0	52	ETQIITGSDESCRK	Deamidated(Q)@3; Propionamide(C)@12	missed R-K@13	0.0035	1637.76	3	10	1.1.1.1014.5	Winner
0	99	FTSQDASTPASSELNK	Deamidated(Q)@4		0.005	1682.77	2	12	1.1.1.1178.5	Winner
0	99	NQYQALKPR	Deamidated(Q)@4		-0.0003	1117.59	2	13	1.1.1.997.7	Winner
0	98.9	NQYQALKPR	Deamidated(Q)@4		-0.0003	1117.59	2	12	1.1.1.992.8	Winner
0.01	14.7	AKLQEAMK	Deamidated(Q)@4	missed K-L@2	0.0002	918.485	2	6	1.1.1.864.4	Winner
0.23	83.1	EALKQLHSETQR	Deamidated(Q)@5	missed K-Q@4	-0.0003	1439.74	3	8	1.1.1.956.5	Winner
0	99	NEELEIQEK	Deamidated(Q)@7		0.0033	1131.53	2	14	1.1.1.1154.5	Winner
0	99	TGSLLNQPK	Deamidated(Q)@7		0.0009	957.514	2	14	1.1.1.1081.7	Winner
0	99	TGSLLNQPK	Deamidated(Q)@7		0.0009	957.514	2	13	1.1.1.1087.6	Winner
0	99	TGSLLNQPK	Deamidated(Q)@7		0.0007	957.514	2	13	1.1.1.1097.7	Winner
0	99	TGSLLNQPK	Deamidated(Q)@7		0.0009	957.514	2	13	1.1.1.1102.6	Winner
0	98.4	TGSLLNQPK	Deamidated(Q)@7		0.0009	957.514	2	12	1.1.1.1092.6	Winner
0	98.1	NEELEIQEK	Deamidated(Q)@7		0.0033	1131.53	2	12	1.1.1.1159.5	Winner
0	94	TGSLLNQPK	Deamidated(Q)@7		0.0007	957.514	2	10	1.1.1.1107.6	Winner
0.22	82.2	ELEALKQR	Deamidated(Q)@7	missed K-Q@6	-0.0012	986.538	2	8	1.1.1.1006.5	Winner
0	12.9	ELEALKQR	Deamidated(Q)@7	missed K-Q@6	-0.0012	986.538	2	6	1.1.1.1001.5	Winner
0	99	TVADSDESYMEK	Dehydrated(S)@8; Met->Hcy(M)@10		0.0183	1341.56	2	13	1.1.1.963.8	Winner
0	77.7	TVADSDESYMEK	Dehydrated(S)@8; Met->Hcy(M)@10		0.0183	1341.56	2	10	1.1.1.968.7	Winner
0	22.5	TGSLLNQPK	Dehydrated(T)@1		-0.0015	938.517	2	5	1.1.1.1033.3	Winner
0	96.4	SSAVGPPEK	Delta:H(4)C(2)(K)@9		0.0008	898.477	2	9	1.1.1.1004.5	Winner
0	96.4	SSAVGPPEK	Delta:H(4)C(2)(K)@9		0.0008	898.477	2	10	1.1.1.1010.3	Winner
0	92.9	SSAVGPPEK	Delta:H(4)C(2)(K)@9		0.0006	898.477	2	10	1.1.1.1016.2	Winner
0	77.7	SSAVGPPEK	Delta:H(4)C(2)(K)@9		-0.0014	898.475	2	8	1.1.1.1021.4	Winner
0	44.3	SSAVGPPEK	Delta:H(4)C(2)(K)@9		0.0004	898.476	2	6	1.1.1.1027.2	Winner
0.02	98.4	VEEPEQQNK	Delta:H(4)C(2)@N-term		-0.001	1127.54	2	13	1.1.1.888.4	Winner
0	97.7	VEEPEQQNK	Delta:H(4)C(2)@N-term		-0.001	1127.54	2	11	1.1.1.894.4	Winner
0	96.4	VEEPEQQNK	Delta:H(4)C(2)@N-term		-0.001	1127.54	2	10	1.1.1.882.6	Winner
0	99	MGYFPTEEK	Dioxidation(M)@1		-0.0001	1132.47	2	11	1.1.1.1235.8	Winner
0	99	MGYFPTEEK	Dioxidation(M)@1		-0.0001	1132.47	2	11	1.1.1.1241.10	Winner
0	99	MGYFPTEEK	Dioxidation(M)@1		-0.0001	1132.47	2	12	1.1.1.1247.7	Winner
0	98.8	MGYFPTEEK	Dioxidation(M)@1		0.0007	1132.48	2	10	1.1.1.1229.4	Winner
0	95.5	MGYFPTEEK	Dioxidation(M)@1		0.0027	1132.48	2	9	1.1.1.1254.4	Winner
0	99	TVADSDESYMEK	Dioxidation(M)@10		0.001	1405.56	2	14	1.1.1.954.6	Winner
0	99	TVADSDESYMEK	Dioxidation(M)@10		0.001	1405.56	2	18	1.1.1.960.9	Winner
0	99	TVADSDESYMEK	Dioxidation(M)@10		0.001	1405.56	2	19	1.1.1.965.10	Winner
0	99	EIIDTANTTEMNSDHHSK	Dioxidation(M)@11		-0.0002	2073.89	4	14	1.1.1.991.7	Winner
0	36.7	EIIDTANTTEMNSDHHSK	Dioxidation(M)@11		-0.0002	2073.89	4	10	1.1.1.986.11	Winner
0	91	DMGTDGKEELK	Dioxidation(M)@2	missed K-E@7	-0.0039	1253.54	3	9	1.1.1.831.2	Winner
0	99	DEKEMDKENNDGSSEIGK	Dioxidation(M)@5	missed K-E@3; missed K-E@7	-0.0016	2055.85	4	16	1.1.1.826.3	Winner
0	98.5	RGPSFMTSPSPK	Dioxidation(M)@6	missed R-G@1	0.0014	1322.63	3	12	1.1.1.999.3	Winner
0	98.5	RGPSFMTSPSPK	Dioxidation(M)@6	missed R-G@1	0.0014	1322.63	3	10	1.1.1.1004.4	Winner
0	97.1	PMVIQESK	Formyl@N-term	cleaved R-P@N-term	-0.0008	958.479	2	11	1.1.1.915.4	Winner
0	96.4	PMVIQESK	Formyl@N-term	cleaved R-P@N-term	-0.0005	958.479	2	11	1.1.1.927.5	Winner
0	88.7	PMVIQESK	Formyl@N-term	cleaved R-P@N-term	-0.0005	958.479	2	10	1.1.1.921.3	Winner
0	6	PMVIQESK	Formyl@N-term	cleaved R-P@N-term	-0.0005	958.479	2	7	1.1.1.909.5	Winner
0	99	PTCHGNAMALLK	Formyl@N-term; Dioxidation(C)@3; Oxidation(M)@8	cleaved R-P@N-term	0.0002	1330.6	2	15	1.1.1.1144.7	Winner
0	99	PTCHGNAMALLK	Formyl@N-term; Dioxidation(C)@3; Oxidation(M)@8	cleaved R-P@N-term	0.0021	1330.6	2	17	1.1.1.1149.5	Winner
0	99	PTCHGNAMALLK	Formyl@N-term; Dioxidation(C)@3; Oxidation(M)@8	cleaved R-P@N-term	0.0021	1330.6	2	18	1.1.1.1154.6	Winner
2	99	QLHSETQR	Gln->pyro-Glu@N-term		-0.0006	980.467	2	12	1.1.1.864.5	Winner
0	99	QLHSETQR	Gln->pyro-Glu@N-term		-0.0006	980.467	2	12	1.1.1.845.3	Winner
0	99	QLHSETQR	Gln->pyro-Glu@N-term		-0.0006	980.467	2	12	1.1.1.852.5	Winner
0	99	QLHSETQR	Gln->pyro-Glu@N-term		-0.0006	980.467	2	13	1.1.1.858.4	Winner
0	99	QLHSETQR	Gln->pyro-Glu@N-term		-0.0008	980.467	2	10	1.1.1.870.5	Winner
0	99	QLHSETQR	Gln->pyro-Glu@N-term		-0.0006	980.467	2	12	1.1.1.876.4	Winner
0.11	98	QYQALKPR	Gln->pyro-Glu@N-term	cleaved N-Q@N-term	-0.0006	985.534	2	10	1.1.1.954.4	Winner
0	96.4	QYQALKPR	Gln->pyro-Glu@N-term	cleaved N-Q@N-term	-0.0006	985.534	2	8	1.1.1.1179.3	Winner
0	77.7	QYQALKPR	Gln->pyro-Glu@N-term	cleaved N-Q@N-term	-0.0006	985.534	2	8	1.1.1.948.7	Winner
0	56.2	QLHSETQR	Gln->pyro-Glu@N-term		-0.0008	980.467	2	8	1.1.1.885.3	Winner
0	98.5	QLHSETQR	Gln->pyro-Glu@N-term; Deamidated(Q)@7		0.0016	981.453	2	8	1.1.1.875.6	Winner
0	99	TVADSDESYMEK	Methyl(D)@6; Methyl(E)@7; Oxidation(M)@10		0.0013	1417.59	2	13	1.1.1.1107.11	Winner
2	99	MGYFPTEEKSETDENSGK	Oxidation(M)@1	missed K-S@9	0.0023	2063.87	3	24	1.1.1.1148.9	Winner
0	99	MGYFPTEEK	Oxidation(M)@1		0.0004	1116.48	2	12	1.1.1.1194.3	Winner
0	99	MGYFPTEEK	Oxidation(M)@1		-0.0001	1116.48	2	13	1.1.1.1200.4	Winner
0	99	MGYFPTEEK	Oxidation(M)@1		0.0002	1116.48	2	14	1.1.1.1206.5	Winner
0	99	MGYFPTEEK	Oxidation(M)@1		0.0002	1116.48	2	13	1.1.1.1212.5	Winner
0	99	MGYFPTEEK	Oxidation(M)@1		0.0002	1116.48	2	13	1.1.1.1218.4	Winner
0	99	MGYFPTEEK	Oxidation(M)@1		0.002	1116.48	2	14	1.1.1.1224.3	Winner
0	99	MGYFPTEEK	Oxidation(M)@1		-0.0001	1116.48	2	12	1.1.1.1230.7	Winner
0	99	MGYFPTEEK	Oxidation(M)@1		0.0002	1116.48	2	12	1.1.1.1236.5	Winner
0	99	MGYFPTEEK	Oxidation(M)@1		-0.0004	1116.48	2	12	1.1.1.1242.6	Winner
0	99	MGYFPTEEKSETDENSGK	Oxidation(M)@1	missed K-S@9	0.0023	2063.87	3	14	1.1.1.1142.10	Winner
0	99	MGYFPTEEKSETDENSGK	Oxidation(M)@1	missed K-S@9	0.0023	2063.87	3	19	1.1.1.1153.9	Winner
0	99	MGYFPTEEKSETDENSGK	Oxidation(M)@1	missed K-S@9	0.0023	2063.87	3	16	1.1.1.1158.9	Winner
0	98.9	MGYFPTEEK	Oxidation(M)@1		-0.0007	1116.48	2	10	1.1.1.1254.3	Winner
0	98.7	MGYFPTEEK	Oxidation(M)@1		-0.0001	1116.48	2	11	1.1.1.1248.4	Winner
0	36.7	MGYFPTEEK	Oxidation(M)@1; Delta:H(4)C(2)(K)@9		-0.0001	1144.51	2	10	1.1.1.1421.3	Winner
0	22.5	MGYFPTEEK	Oxidation(M)@1; Oxidation(Y)@3		-0.0003	1132.47	2	8	1.1.1.1049.5	Winner
2	99	ESALNLPYHMPENK	Oxidation(M)@10		-0.0017	1657.78	3	16	1.1.1.1299.6	Winner
0	99	ESALNLPYHMPENK	Oxidation(M)@10		-0.0017	1657.78	3	15	1.1.1.1294.9	Winner
0	99	ESALNLPYHMPENK	Oxidation(M)@10		-0.0017	1657.78	3	16	1.1.1.1304.6	Winner
0	99	ESALNLPYHMPENK	Oxidation(M)@10		-0.0017	1657.78	3	14	1.1.1.1309.9	Winner
0	99	ESALNLPYHMPENK	Oxidation(M)@10		-0.0018	1657.78	3	13	1.1.1.1315.8	Winner
0	99	TVADSDESYMEK	Oxidation(M)@10		-0.0003	1389.56	2	12	1.1.1.916.7	Winner
0	99	TVADSDESYMEK	Oxidation(M)@10		-0.0003	1389.56	2	12	1.1.1.922.5	Winner
0	99	TVADSDESYMEK	Oxidation(M)@10		-0.0003	1389.56	2	13	1.1.1.928.6	Winner
0	99	TVADSDESYMEK	Oxidation(M)@10		-0.0003	1389.56	2	17	1.1.1.933.8	Winner
0	99	TVADSDESYMEK	Oxidation(M)@10		-0.0002	1389.56	2	21	1.1.1.938.7	Winner
0	99	TVADSDESYMEK	Oxidation(M)@10		-0.0002	1389.56	2	21	1.1.1.944.9	Winner
0	99	TVADSDESYMEK	Oxidation(M)@10		-0.0002	1389.56	2	21	1.1.1.950.14	Winner
0	99	TVADSDESYMEK	Oxidation(M)@10		-0.0003	1389.56	2	20	1.1.1.956.9	Winner
0	99	TVADSDESYMEK	Oxidation(M)@10		-0.0003	1389.56	2	18	1.1.1.962.6	Winner
0	99	TVADSDESYMEK	Oxidation(M)@10		-0.0002	1389.56	2	14	1.1.1.967.9	Winner
0	99	TVADSDESYMEK	Oxidation(M)@10		0.0003	1389.56	2	13	1.1.1.973.5	Winner
0	99	TVADSDESYMEK	Oxidation(M)@10		0.0026	1389.56	2	10	1.1.1.979.7	Winner
0	99	TVADSDESYMEK	Oxidation(M)@10		0.0003	1389.56	2	11	1.1.1.993.10	Winner
0	99	TVADSDESYMEK	Oxidation(M)@10		0.0025	1389.56	2	9	1.1.1.1004.11	Winner
0	98.8	TVADSDESYMEK	Oxidation(M)@10		-0.0008	1389.56	2	9	1.1.1.1039.7	Winner
0	93.9	ESALNLPYHMPENK	Oxidation(M)@10		-0.0017	1657.78	3	11	1.1.1.1289.6	Winner
0	93.3	ESALNLPYHMPENK	Oxidation(M)@10		-0.0037	1657.77	3	9	1.1.1.1320.8	Winner
0	98.8	TVADSDESYMEK	Oxidation(M)@10; Delta:H(4)C(2)(K)@12		0.0009	1417.59	2	12	1.1.1.1112.9	Winner
0	97.1	TVADSDESYMEK	Oxidation(M)@10; Delta:H(4)C(2)(K)@12		0.0009	1417.59	2	10	1.1.1.1118.8	Winner
0	96.4	TVADSDESYMEK	Oxidation(M)@10; Delta:H(4)C(2)(K)@12		0.0013	1417.59	2	10	1.1.1.1102.11	Winner
2	99	EIIDTANTTEMNSDHHSK	Oxidation(M)@11		0.0019	2057.9	4	19	1.1.1.977.6	Winner
0	99	EIIDTANTTEMNSDHHSK	Oxidation(M)@11		0.0019	2057.9	4	21	1.1.1.966.8	Winner
0	99	EIIDTANTTEMNSDHHSK	Oxidation(M)@11		0.0019	2057.9	4	20	1.1.1.971.7	Winner
0	98	EIIDTANTTEMNSDHHSK	Oxidation(M)@11		0.0024	2057.9	4	12	1.1.1.961.8	Winner
0	99	EIIDTANTTEMNSDHHSK	Oxidation(M)@11; Deamidated(N)@12		0.004	2058.88	4	15	1.1.1.983.5	Winner
0	99	EIIDTANTTEMNSDHHSK	Oxidation(M)@11; Deamidated(N)@12		0.004	2058.88	4	16	1.1.1.988.8	Winner
0	99	EIIDTANTTEMNSDHHSK	Oxidation(M)@11; Deamidated(N)@12		0.004	2058.88	4	13	1.1.1.993.6	Winner
0	99	EIIDTANTTEMNSDHHSK	Oxidation(M)@11; Deamidated(N)@12		0.0033	2058.88	3	14	1.1.1.993.9	Winner
0	99	EIIDTANTTEMNSDHHSK	Oxidation(M)@11; Deamidated(N)@12		0.0032	2058.88	4	13	1.1.1.998.5	Winner
2	99	DMGTDGKEELKADVVPVTLAPK	Oxidation(M)@2	missed K-E@7; missed K-A@11	-0.0068	2328.18	4	18	1.1.1.1508.4	Winner
2	99	EMDKENNDGSSEIGK	Oxidation(M)@2	missed K-E@4	-0.0011	1667.69	3	16	1.1.1.804.4	Winner
0	99	DMGTDGKEELKADVVPVTLAPK	Oxidation(M)@2	missed K-E@7; missed K-A@11	-0.0065	2328.18	4	17	1.1.1.1492.4	Winner
0	99	DMGTDGKEELKADVVPVTLAPK	Oxidation(M)@2	missed K-E@7; missed K-A@11	-0.0068	2328.18	4	17	1.1.1.1519.2	Winner
0	99	EMDKENNDGSSEIGK	Oxidation(M)@2	missed K-E@4	-0.0011	1667.69	3	14	1.1.1.787.2	Winner
0	99	EMDKENNDGSSEIGK	Oxidation(M)@2	missed K-E@4	-0.0011	1667.69	3	20	1.1.1.798.2	Winner
0	99	PMVIQESK	Oxidation(M)@2	cleaved R-P@N-term	0.0001	946.48	2	13	1.1.1.872.5	Winner
0	99	PMVIQESK	Oxidation(M)@2	cleaved R-P@N-term	0.0001	946.48	2	13	1.1.1.878.4	Winner
0	99	PMVIQESK	Oxidation(M)@2	cleaved R-P@N-term	0.0001	946.48	2	12	1.1.1.884.10	Winner
0	98.9	DMGTDGKEELK	Oxidation(M)@2	missed K-E@7	-0.0002	1237.55	3	12	1.1.1.821.2	Winner
0	98.4	PMVIQESK	Oxidation(M)@2	cleaved R-P@N-term	0.0001	946.48	2	8	1.1.1.866.4	Winner
0	97.8	PMVIQESK	Oxidation(M)@2	cleaved R-P@N-term	-0.0013	946.478	2	8	1.1.1.890.11	Winner
0	81.2	DMGTDGKEELK	Oxidation(M)@2	missed K-E@7	-0.0002	1237.55	3	10	1.1.1.816.2	Winner
0	43.4	DMGTDGKEELK	Oxidation(M)@2	missed K-E@7	-0.0002	1237.55	3	9	1.1.1.827.2	Winner
0	16.8	PMVIQESK	Oxidation(M)@2	cleaved R-P@N-term	0.0063	946.486	2	6	1.1.1.1005.5	Winner
0	1.6	PMVIQESK	Oxidation(M)@2	cleaved R-P@N-term	0.0063	946.486	2	5	1.1.1.1000.6	Winner
0	15.4	EMDKENNDGSSEIGK	Oxidation(M)@2; Deamidated(N)@6	missed K-E@4	-0.0016	1668.68	3	9	1.1.1.827.4	Winner
0	97.8	EMDKENNDGSSEIGK	Oxidation(M)@2; Deamidated(N)@7	missed K-E@4	-0.0016	1668.68	3	12	1.1.1.821.6	Winner
0.16	92	SFMTSPSPK	Oxidation(M)@3	cleaved P-S@N-term	-0.0008	996.458	2	9	1.1.1.927.6	Winner
0	88.7	SFMTSPSPK	Oxidation(M)@3	cleaved P-S@N-term	-0.0008	996.458	2	8	1.1.1.932.5	Winner
0	77.7	SFMTSPSPK	Oxidation(M)@3	cleaved P-S@N-term	-0.0008	996.458	2	8	1.1.1.921.4	Winner
2	99	ENMEELLNLCSGK	Oxidation(M)@3; Trioxidation(C)@10		-0.0019	1542.65	2	20	1.1.1.1536.3	Winner
0	99	ENMEELLNLCSGK	Oxidation(M)@3; Trioxidation(C)@10		-0.0013	1542.65	2	20	1.1.1.1542.4	Winner
0	99	ENMEELLNLCSGK	Oxidation(M)@3; Trioxidation(C)@10		-0.0013	1542.65	2	17	1.1.1.1548.3	Winner
1.17	99	SRPMVIQESK	Oxidation(M)@4	cleaved A-S@N-term	0.0005	1189.61	2	14	1.1.1.894.5	Winner
0	99	SRPMVIQESK	Oxidation(M)@4	cleaved A-S@N-term	0.0005	1189.61	2	13	1.1.1.900.6	Winner
0	99	SRPMVIQESK	Oxidation(M)@4	cleaved A-S@N-term	0.0005	1189.61	2	13	1.1.1.906.4	Winner
2	99	ASRPMVIQESK	Oxidation(M)@5	cleaved N-A@N-term	0	1260.65	3	16	1.1.1.886.2	Winner
2	99	DEKEMDKENNDGSSEIGK	Oxidation(M)@5	missed K-E@3; missed K-E@7	-0.0034	2039.86	4	19	1.1.1.823.3	Winner
1	99	HGNAMALLK	Oxidation(M)@5	cleaved C-H@N-term	-0.0022	969.505	2	11	1.1.1.907.2	Winner
0	99	ASRPMVIQESK	Oxidation(M)@5	cleaved N-A@N-term	0	1260.65	3	12	1.1.1.892.3	Winner
0	99	DEKEMDKENNDGSSEIGK	Oxidation(M)@5	missed K-E@3; missed K-E@7	-0.0034	2039.86	4	15	1.1.1.812.2	Winner
0	99	DEKEMDKENNDGSSEIGK	Oxidation(M)@5	missed K-E@3; missed K-E@7	-0.0034	2039.86	4	21	1.1.1.818.2	Winner
0	99	GPSFMTSPSPK	Oxidation(M)@5		0.0002	1150.53	2	13	1.1.1.1034.5	Winner
0	99	GPSFMTSPSPK	Oxidation(M)@5		-0.0001	1150.53	2	19	1.1.1.1040.8	Winner
0	99	GPSFMTSPSPK	Oxidation(M)@5		-0.0001	1150.53	2	19	1.1.1.1046.9	Winner
0	99	GPSFMTSPSPK	Oxidation(M)@5		-0.0001	1150.53	2	19	1.1.1.1052.9	Winner
0	99	GPSFMTSPSPK	Oxidation(M)@5		-0.0016	1150.53	2	18	1.1.1.1058.11	Winner
0	99	GPSFMTSPSPK	Oxidation(M)@5		-0.0019	1150.53	2	11	1.1.1.1064.17	Winner
0	99	GPSFMTSPSPK	Oxidation(M)@5		0.0002	1150.53	2	9	1.1.1.1076.12	Winner
0	98.6	GPSFMTSPSPK	Oxidation(M)@5		-0.0016	1150.53	2	9	1.1.1.1070.13	Winner
0	98.5	ASRPMVIQESK	Oxidation(M)@5	cleaved N-A@N-term	-0.0001	1260.65	2	10	1.1.1.898.6	Winner
0	96.4	ASRPMVIQESK	Oxidation(M)@5	cleaved N-A@N-term	0	1260.65	3	11	1.1.1.880.2	Winner
0	36.7	HGNAMALLK	Oxidation(M)@5	cleaved C-H@N-term	-0.002	969.505	2	7	1.1.1.900.3	Winner
0	99	DEKEMDKENNDGSSEIGK	Oxidation(M)@5; Deamidated(N)@10	missed K-E@3; missed K-E@7	-0.0002	2040.84	4	16	1.1.1.831.5	Winner
0	99	DEKEMDKENNDGSSEIGK	Oxidation(M)@5; Deamidated(N)@9	missed K-E@3; missed K-E@7	0.0014	2040.84	3	20	1.1.1.837.4	Winner
0	99	GPSFMTSPSPK	Oxidation(M)@5; Phospho(S)@9		0.0015	1230.5	2	11	1.1.1.1228.8	Winner
0	99	GPSFMTSPSPK	Oxidation(M)@5; Phospho(S)@9		0.0015	1230.5	2	12	1.1.1.1255.5	Winner
0	99	GPSFMTSPSPK	Oxidation(M)@5; Phospho(S)@9		-0.0013	1230.5	2	12	1.1.1.1264.6	Winner
0	99	GPSFMTSPSPK	Oxidation(M)@5; Phospho(S)@9		-0.0017	1230.5	2	14	1.1.1.1273.4	Winner
0	99	GPSFMTSPSPK	Oxidation(M)@5; Phospho(S)@9		-0.0044	1230.49	2	12	1.1.1.1288.5	Winner
0	98.8	GPSFMTSPSPK	Oxidation(M)@5; Phospho(S)@9		0.0015	1230.5	2	11	1.1.1.1234.7	Winner
0	98.2	GPSFMTSPSPK	Oxidation(M)@5; Phospho(S)@9		0.0009	1230.5	2	9	1.1.1.1241.12	Winner
0	92	GPSFMTSPSPK	Oxidation(M)@5; Phospho(S)@9		0.0015	1230.5	2	10	1.1.1.1248.5	Winner
0	85	GPSFMTSPSPK	Oxidation(M)@5; Phospho(S)@9		-0.0013	1230.5	2	9	1.1.1.1220.9	Winner
2	99	RGPSFMTSPSPK	Oxidation(M)@6	missed R-G@1	0.0018	1306.64	3	15	1.1.1.981.6	Winner
0	99	NASRPMVIQESK	Oxidation(M)@6		-0.0013	1374.69	3	13	1.1.1.896.4	Winner
0	99	NASRPMVIQESK	Oxidation(M)@6		-0.0013	1374.69	3	15	1.1.1.902.2	Winner
0	99	NASRPMVIQESK	Oxidation(M)@6		-0.0013	1374.69	3	13	1.1.1.908.3	Winner
0	99	NASRPMVIQESK	Oxidation(M)@6		-0.0019	1374.69	3	13	1.1.1.914.3	Winner
0	99	RGPSFMTSPSPK	Oxidation(M)@6	missed R-G@1	0.0018	1306.64	3	12	1.1.1.969.5	Winner
0	99	RGPSFMTSPSPK	Oxidation(M)@6	missed R-G@1	0.0018	1306.64	3	13	1.1.1.975.7	Winner
0	99	RGPSFMTSPSPK	Oxidation(M)@6	missed R-G@1	0.0018	1306.64	3	14	1.1.1.986.5	Winner
0	99	RGPSFMTSPSPK	Oxidation(M)@6	missed R-G@1	0.0018	1306.64	3	11	1.1.1.991.3	Winner
0	89.3	NASRPMVIQESK	Oxidation(M)@6		-0.0007	1374.69	3	9	1.1.1.970.3	Winner
0	79.1	NASRPMVIQESK	Oxidation(M)@6		-0.0013	1374.69	3	10	1.1.1.890.7	Winner
0	76.4	NASRPMVIQESK	Oxidation(M)@6		-0.0013	1374.69	3	8	1.1.1.884.6	Winner
0	53.9	RGPSFMTSPSPK	Oxidation(M)@6	missed R-G@1	0.0012	1306.64	3	5	1.1.1.1004.2	Winner
0	42	NASRPMVIQESK	Oxidation(M)@6		-0.0057	1374.69	3	9	1.1.1.931.3	Winner
0	37.9	NASRPMVIQESK	Oxidation(M)@6		-0.0057	1374.69	3	9	1.1.1.936.3	Winner
0	36.2	RGPSFMTSPSPK	Oxidation(M)@6	missed R-G@1	0.0009	1306.63	3	8	1.1.1.996.5	Winner
0	99	NASRPMVIQESK	Oxidation(M)@6; Deamidated(Q)@9		0	1375.68	2	12	1.1.1.919.5	Winner
0	99	NASRPMVIQESK	Oxidation(M)@6; Deamidated(Q)@9		0.0026	1375.68	3	13	1.1.1.925.4	Winner
0.21	96	LPLASMDENAM	Oxidation(M)@6; Oxidation(M)@11	cleaved M-D@C-term	-0.0004	1222.52	2	11	1.1.1.1194.4	Winner
0	18.4	RGPSFMTSPSPK	Oxidation(M)@6; Phospho(S)@10	missed R-G@1	-0.0007	1386.6	2	7	1.1.1.1130.6	Winner
2	99	KRGPSFMTSPSPK	Oxidation(M)@7	missed K-R@1; missed R-G@2	-0.0023	1434.73	3	16	1.1.1.887.6	Winner
0	99	KRGPSFMTSPSPK	Oxidation(M)@7	missed K-R@1; missed R-G@2	-0.0023	1434.73	3	14	1.1.1.881.3	Winner
0	94.9	KRGPSFMTSPSPK	Oxidation(M)@7	missed K-R@1; missed R-G@2	-0.0023	1434.73	3	11	1.1.1.893.4	Winner
2	99	NIDDASQMDLFHR	Oxidation(M)@8		-0.0036	1576.69	3	11	1.1.1.1311.4	Winner
0	99	NIDDASQMDLFHR	Oxidation(M)@8		-0.0036	1576.69	3	12	1.1.1.1317.3	Winner
0	98.9	NIDDASQMDLFHR	Oxidation(M)@8		-0.001	1576.69	3	11	1.1.1.1322.6	Winner
0	98.5	PMVIQESK	Oxidation(P)@1; Oxidation(M)@2	cleaved R-P@N-term	-0.0019	962.472	2	10	1.1.1.909.6	Winner
0	99	KPRPTCHGNAMALLK	Oxidation(P)@4; Dioxidation(C)@6; Oxidation(M)@11		0.0008	1699.85	3	18	1.1.1.965.9	Winner
0	99	KPRPTCHGNAMALLK	Oxidation(P)@4; Dioxidation(C)@6; Oxidation(M)@11		0.0008	1699.85	3	15	1.1.1.976.6	Winner
0	98.8	NASRPMVIQESK	Oxidation(P)@5; Oxidation(M)@6		-0.0011	1390.69	3	13	1.1.1.928.4	Winner
0	97.7	NASRPMVIQESK	Oxidation(P)@5; Oxidation(M)@6		-0.0011	1390.69	3	12	1.1.1.922.3	Winner
0	77.7	NASRPMVIQESK	Oxidation(P)@5; Oxidation(M)@6		-0.0011	1390.69	3	10	1.1.1.916.3	Winner
0	3.8	EQWLRDMAQQGK	Oxidation(W)@3; Oxidation(M)@7	missed R-D@5	-0.0005	1520.7	3	9	1.1.1.953.5	Winner
0	95.5	RGPSFMTSPSPK	Phospho(R)@1; Oxidation(M)@6	missed R-G@1	-0.0011	1386.6	2	8	1.1.1.1058.12	Winner
0	36.7	ASRPMVIQESK	Phospho(S)@2; Oxidation(M)@5	cleaved N-A@N-term	0.0221	1340.64	3	8	1.1.1.901.2	Winner
2	99	SPSPGLFR	Phospho(S)@3		0.0002	939.422	2	12	1.1.1.1551.2	Winner
0	99	SPSPGLFR	Phospho(S)@3		-0.0015	939.42	2	12	1.1.1.1414.2	Winner
0	99	SPSPGLFR	Phospho(S)@3		-0.0015	939.42	2	12	1.1.1.1420.2	Winner
0	99	SPSPGLFR	Phospho(S)@3		-0.0018	939.42	2	12	1.1.1.1426.2	Winner
0	99	SPSPGLFR	Phospho(S)@3		-0.0015	939.42	2	12	1.1.1.1431.3	Winner
0	99	SPSPGLFR	Phospho(S)@3		-0.0015	939.42	2	12	1.1.1.1436.3	Winner
0	99	SPSPGLFR	Phospho(S)@3		-0.002	939.42	2	12	1.1.1.1447.3	Winner
0	99	SPSPGLFR	Phospho(S)@3		-0.0021	939.419	2	12	1.1.1.1455.2	Winner
0	99	SPSPGLFR	Phospho(S)@3		-0.002	939.42	2	12	1.1.1.1465.2	Winner
0	99	SPSPGLFR	Phospho(S)@3		-0.0015	939.42	2	12	1.1.1.1470.3	Winner
0	99	SPSPGLFR	Phospho(S)@3		-0.002	939.42	2	12	1.1.1.1475.3	Winner
0	99	SPSPGLFR	Phospho(S)@3		-0.002	939.42	2	12	1.1.1.1480.2	Winner
0	99	SPSPGLFR	Phospho(S)@3		-0.002	939.42	2	12	1.1.1.1485.2	Winner
0	99	SPSPGLFR	Phospho(S)@3		-0.002	939.42	2	12	1.1.1.1490.3	Winner
0	99	SPSPGLFR	Phospho(S)@3		-0.0015	939.42	2	12	1.1.1.1512.2	Winner
0	99	SPSPGLFR	Phospho(S)@3		-0.002	939.42	2	12	1.1.1.1523.2	Winner
0	99	SPSPGLFR	Phospho(S)@3		-0.0001	939.421	2	12	1.1.1.1557.2	Winner
0	99	SPSPGLFR	Phospho(S)@3		0.0002	939.422	2	10	1.1.1.1584.2	Winner
0	99	SPSPGLFR	Phospho(S)@3		0.0002	939.422	2	12	1.1.1.1600.2	Winner
0	99	SPSPGLFR	Phospho(S)@3		-0.0021	939.419	2	12	1.1.1.1619.2	Winner
0	99	SPSPGLFR	Phospho(S)@3		-0.0018	939.42	2	12	1.1.1.1672.2	Winner
0	99	SPSPGLFR	Phospho(S)@3		-0.0018	939.42	2	11	1.1.1.1693.2	Winner
0	99	SPSPGLFR	Phospho(S)@3		-0.0004	939.421	2	11	1.1.1.1843.2	Winner
0	99	SPSPGLFR	Phospho(S)@3		0.0005	939.422	2	11	1.1.1.1886.2	Winner
0	99	SPSPGLFR	Phospho(S)@3		-0.0001	939.421	2	11	1.1.1.1907.2	Winner
0	99	SPSPGLFR	Phospho(S)@3		0.0005	939.422	2	12	1.1.1.1927.2	Winner
0	99	SPSPGLFR	Phospho(S)@3		0.0009	939.423	2	11	1.1.1.1943.2	Winner
0	99	SPSPGLFR	Phospho(S)@3		0.0002	939.422	2	11	1.1.1.1965.2	Winner
0	99	SPSPGLFR	Phospho(S)@3		0.0005	939.422	2	11	1.1.1.2009.2	Winner
0	98.8	SPSPGLFR	Phospho(S)@3		-0.0021	939.419	2	11	1.1.1.1568.2	Winner
0	98.8	SPSPGLFR	Phospho(S)@3		-0.0021	939.419	2	11	1.1.1.1656.2	Winner
0	98.8	SPSPGLFR	Phospho(S)@3		-0.002	939.42	2	11	1.1.1.1738.2	Winner
0	98.8	SPSPGLFR	Phospho(S)@3		-0.0023	939.419	2	11	1.1.1.1759.2	Winner
0	98.7	SPSPGLFR	Phospho(S)@3		-0.0018	939.42	2	11	1.1.1.1501.2	Winner
0	98.7	SPSPGLFR	Phospho(S)@3		0.0005	939.422	2	10	1.1.1.1954.2	Winner
0	98.6	SPSPGLFR	Phospho(S)@3		-0.0004	939.421	2	10	1.1.1.2042.2	Winner
0	98.5	SPSPGLFR	Phospho(S)@3		-0.0021	939.419	2	10	1.1.1.1785.2	Winner
0	98.1	SPSPGLFR	Phospho(S)@3		0.0005	939.422	2	10	1.1.1.1864.2	Winner
0	97.9	SPSPGLFR	Phospho(S)@3		-0.0018	939.42	2	10	1.1.1.1981.2	Winner
0	97.8	SPSPGLFR	Phospho(S)@3		-0.0023	939.419	2	11	1.1.1.1640.2	Winner
0	97.3	SPSPGLFR	Phospho(S)@3		-0.0021	939.419	2	9	1.1.1.1409.3	Winner
0	97.3	SPSPGLFR	Phospho(S)@3		-0.002	939.42	2	10	1.1.1.2083.2	Winner
0	97.1	SPSPGLFR	Phospho(S)@3		-0.0021	939.419	2	10	1.1.1.1717.2	Winner
0	96.6	SPSPGLFR	Phospho(S)@3		0.0001	939.422	2	11	1.1.1.1539.2	Winner
0	95.3	SPSPGLFR	Phospho(S)@3		0.0001	939.422	2	9	1.1.1.1994.2	Winner
0	94	SPSPGLFR	Phospho(S)@3		-0.0001	939.421	2	9	1.1.1.2063.2	Winner
0	93.9	SPSPGLFR	Phospho(S)@3		0.0001	939.422	2	10	1.1.1.1545.3	Winner
0	92.3	SPSPGLFR	Phospho(S)@3		0.0002	939.422	2	10	1.1.1.1801.2	Winner
0	91.1	SPSPGLFR	Phospho(S)@3		-0.0015	939.42	2	10	1.1.1.1533.3	Winner
0	89.3	SPSPGLFR	Phospho(S)@3		0.0001	939.422	2	9	1.1.1.1822.2	Winner
0	89.3	SPSPGLFR	Phospho(S)@3		-0.0026	939.419	2	8	1.1.1.2109.2	Winner
0	80.5	SPSPGLFR	Phospho(S)@3		0.0005	939.422	2	9	1.1.1.2024.2	Winner
0	35.7	RGPSFMTSPSPK	Phospho(S)@4; Oxidation(M)@6	missed R-G@1	-0.0008	1386.6	2	7	1.1.1.1070.14	Winner
0	7.7	ASLVSSASK	Phospho(S)@5		0.0027	928.429	2	5	1.1.1.955.9	Winner
0	84.4	KRGPSFMTSPSPK	Phospho(S)@5; Oxidation(M)@7	missed K-R@1; missed R-G@2	0.002	1514.7	3	10	1.1.1.951.4	Winner
0	77.6	KRGPSFMTSPSPK	Phospho(S)@5; Oxidation(M)@7	missed K-R@1; missed R-G@2	0.002	1514.7	3	8	1.1.1.957.5	Winner
2	99	NFVFHTLSPVK	Phospho(S)@8		0.0015	1367.67	2	17	1.1.1.1990.2	Winner
0	18.2	ASLVSSASK	Phospho(S)@8		0.0023	928.429	2	7	1.1.1.937.5	Winner
0	99	ETQIITGSDESCRK	Phospho(T)@2	missed R-K@13	-0.0077	1645.69	2	11	1.1.1.1047.7	Winner
1.05	91	RFTLDR	Phospho(T)@3	missed R-F@1	0.0016	886.408	2	8	1.1.1.1151.2	Winner
0	77.2	RFTLDR	Phospho(T)@3	missed R-F@1	0.0016	886.408	2	8	1.1.1.1140.3	Winner
0	72.6	RFTLDR	Phospho(T)@3	missed R-F@1	-0.0002	886.406	2	8	1.1.1.1134.2	Winner
0	60.3	RFTLDR	Phospho(T)@3	missed R-F@1	0.0016	886.408	2	7	1.1.1.1146.3	Winner
0	50.9	RFTLDR	Phospho(T)@3	missed R-F@1	-0.0002	886.406	2	8	1.1.1.1128.2	Winner
0	41.7	RFTLDR	Phospho(T)@3	missed R-F@1	-0.0004	886.406	2	8	1.1.1.1122.2	Winner
0	23.5	RFTLDR	Phospho(T)@3	missed R-F@1	0	886.406	2	6	1.1.1.1166.4	Winner
0	18.8	RFTLDR	Phospho(T)@3	missed R-F@1	0	886.406	2	6	1.1.1.1161.2	Winner
0	9.3	RFTLDR	Phospho(T)@3	missed R-F@1	-0.0004	886.406	2	6	1.1.1.1171.4	Winner
0	99	KENMEELLNLCSGKFTSQDASTPASSELNK	Propionamide(C)@11; Phospho(S)@12; Propionamide(K)@14; Phospho(S)@17	missed K-E@1; missed K-F@14	-0.0104	3572.53	4	15	1.1.1.1112.18	Winner
0	99	ETQIITGSDESCR	Propionamide(C)@12		0.0014	1508.68	2	15	1.1.1.1086.5	Winner
0	99	ETQIITGSDESCR	Propionamide(C)@12		0.0014	1508.68	2	22	1.1.1.1091.3	Winner
0	99	ETQIITGSDESCR	Propionamide(C)@12		0.0014	1508.68	2	22	1.1.1.1096.4	Winner
0	99	ETQIITGSDESCR	Propionamide(C)@12		0.0014	1508.68	2	18	1.1.1.1101.4	Winner
0	99	ETQIITGSDESCRK	Propionamide(C)@12	missed R-K@13	0.002	1636.77	3	14	1.1.1.986.12	Winner
0	99	ETQIITGSDESCRK	Propionamide(C)@12	missed R-K@13	0.002	1636.77	3	15	1.1.1.991.9	Winner
0	99	ETQIITGSDESCRK	Propionamide(C)@12	missed R-K@13	0.002	1636.77	3	14	1.1.1.996.10	Winner
0	97.9	ETQIITGSDESCRK	Propionamide(C)@12	missed R-K@13	0.002	1636.77	3	12	1.1.1.981.13	Winner
0	97.4	ETQIITGSDESCRK	Propionamide(C)@12	missed R-K@13	0.002	1636.77	3	12	1.1.1.1001.8	Winner
2	99	ETQIITGSDESCRK	Trioxidation(C)@12	missed R-K@13	0.0018	1613.72	2	23	1.1.1.1012.9	Winner
0	99	ETQIITGSDESCR	Trioxidation(C)@12		0.0004	1485.63	2	16	1.1.1.1104.8	Winner
0	99	ETQIITGSDESCR	Trioxidation(C)@12		0.0004	1485.63	2	14	1.1.1.1109.9	Winner
0	99	ETQIITGSDESCR	Trioxidation(C)@12		0.0004	1485.63	2	14	1.1.1.1114.11	Winner
0	99	ETQIITGSDESCRK	Trioxidation(C)@12	missed R-K@13	0.0018	1613.72	2	20	1.1.1.1006.8	Winner
0	99	ETQIITGSDESCRK	Trioxidation(C)@12	missed R-K@13	0.0018	1613.72	2	21	1.1.1.1018.6	Winner
0	99	ETQIITGSDESCRK	Trioxidation(C)@12	missed R-K@13	0.002	1613.72	2	13	1.1.1.1024.14	Winner
0	99	ETQIITGSDESCR	Trioxidation(C)@12; Dimethyl(R)@13		-0.0163	1513.64	2	15	1.1.1.1179.7	Winner
0	96.4	ETQIITGSDESCR	Trioxidation(C)@12; Dimethyl(R)@13		-0.0163	1513.64	2	12	1.1.1.1174.4	Winner
0	95.5	ETQIITGSDESCRK	Trioxidation(C)@12; Formyl(K)@14	missed R-K@13	0.0153	1641.73	3	13	1.1.1.1059.5	Winner
0	99	PTCHGNAMALLK	Trioxidation(C)@3; Deamidated(N)@6; Oxidation(M)@8	cleaved R-P@N-term	-0.0008	1319.58	2	14	1.1.1.1230.9	Winner
0	99	PTCHGNAMALLK	Trioxidation(C)@3; Dioxidation(M)@8	cleaved R-P@N-term	0	1334.6	2	17	1.1.1.1148.8	Winner
0	99	PTCHGNAMALLK	Trioxidation(C)@3; Dioxidation(M)@8	cleaved R-P@N-term	0	1334.6	2	14	1.1.1.1153.8	Winner
0	99	PTCHGNAMALLK	Trioxidation(C)@3; Dioxidation(M)@8	cleaved R-P@N-term	0	1334.6	2	17	1.1.1.1158.8	Winner
2	99	PTCHGNAMALLK	Trioxidation(C)@3; Oxidation(M)@8	cleaved R-P@N-term	0.0014	1318.6	2	19	1.1.1.1118.7	Winner
0	99	PTCHGNAMALLK	Trioxidation(C)@3; Oxidation(M)@8	cleaved R-P@N-term	0.0011	1318.6	2	15	1.1.1.1102.10	Winner
0	99	PTCHGNAMALLK	Trioxidation(C)@3; Oxidation(M)@8	cleaved R-P@N-term	0.0014	1318.6	2	19	1.1.1.1107.10	Winner
0	99	PTCHGNAMALLK	Trioxidation(C)@3; Oxidation(M)@8	cleaved R-P@N-term	0.0014	1318.6	2	19	1.1.1.1112.8	Winner
0	99	PTCHGNAMALLK	Trioxidation(C)@3; Oxidation(M)@8	cleaved R-P@N-term	0.0014	1318.6	2	15	1.1.1.1126.8	Winner
2	99	KPRPTCHGNAMALLK	Trioxidation(C)@6; Oxidation(M)@11		0.0008	1699.85	3	19	1.1.1.970.8	Winner
2	99	LDEDDSCSLLTK	Trioxidation(C)@7		-0.0019	1385.58	2	20	1.1.1.1314.4	Winner
0	99	LDEDDSCSLLTK	Trioxidation(C)@7		-0.0019	1385.58	2	15	1.1.1.1320.10	Winner

## Sheet: hu sicdc7
Contrib	Conf	Sequence	Modifications	Cleavages	∆Mass	Prec MW	z	Sc	Spectrum	Type
0.02	99	NQEDDVEQPFNDSG	Amidated@C-term	cleaved G-C@C-term	0.0001	1591.64	2	18	1.1.1.1303.8	Winner
0	99	NQEDDVEQPFNDSG	Amidated@C-term	cleaved G-C@C-term	0.0001	1591.64	2	17	1.1.1.1308.10	Winner
0	83.4	LAALSDHNPSAPR	Cation:Na(D)@6		0.0016	1369.67	3	11	1.1.1.1084.4	Winner
0	99	ETQIITGSDESCR	Cys->Dha(C)@12		0.0022	1403.65	2	15	1.1.1.1086.13	Winner
0	99	ETQIITGSDESCR	Cys->Dha(C)@12		0.0022	1403.65	2	18	1.1.1.1092.14	Winner
0	99	ETQIITGSDESCR	Cys->Dha(C)@12		0.0022	1403.65	2	19	1.1.1.1098.9	Winner
0	99	ETQIITGSDESCR	Cys->Dha(C)@12		0.002	1403.65	2	14	1.1.1.1104.14	Winner
0	99	ETQIITGSDESCRK	Cys->Dha(C)@12	missed R-K@13	-0.0016	1531.75	3	15	1.1.1.982.4	Winner
0	99	ETQIITGSDESCRK	Cys->Dha(C)@12	missed R-K@13	-0.0016	1531.75	3	17	1.1.1.988.3	Winner
0	99	ETQIITGSDESCRK	Cys->Dha(C)@12	missed R-K@13	-0.0016	1531.75	3	16	1.1.1.994.2	Winner
0	99	ETQIITGSDESCRK	Cys->Dha(C)@12	missed R-K@13	-0.0014	1531.75	3	14	1.1.1.999.4	Winner
0	93.4	ETQIITGSDESCRK	Cys->Dha(C)@12	missed R-K@13	-0.001	1531.75	3	10	1.1.1.1004.4	Winner
0	91	ETQIITGSDESCRK	Cys->Dha(C)@12	missed R-K@13	-0.0016	1531.75	3	11	1.1.1.987.5	Winner
0	10.8	ETQIITGSDESCRK	Cys->Dha(C)@12	missed R-K@13	-0.0016	1531.75	3	9	1.1.1.981.3	Winner
0	99	PTCHGNAMALLK	Cys->Dha(C)@3; Oxidation(M)@8	cleaved R-P@N-term	-0.001	1236.63	3	12	1.1.1.1032.2	Winner
0	93.4	PTCHGNAMALLK	Cys->Dha(C)@3; Oxidation(M)@8	cleaved R-P@N-term	-0.001	1236.63	3	10	1.1.1.1026.2	Winner
0	99	NASRPMVIQESK	Deamidated(N)@1		-0.0008	1359.68	3	13	1.1.1.1064.4	Winner
0	99	NASRPMVIQESK	Deamidated(N)@1		0.0001	1359.68	3	15	1.1.1.1098.4	Winner
0	99	NASRPMVIQESK	Deamidated(N)@1		0.0001	1359.68	3	13	1.1.1.1104.5	Winner
0	99	NEELEIQEK	Deamidated(N)@1		0.0038	1131.53	2	11	1.1.1.1205.12	Winner
0	99	NEELEIQEK	Deamidated(N)@1		0.0038	1131.53	2	13	1.1.1.1211.7	Winner
0	99	NQYQALKPR	Deamidated(N)@1		-0.0008	1117.59	2	11	1.1.1.1019.5	Winner
0	99	NQYQALKPR	Deamidated(N)@1		0.0001	1117.59	2	12	1.1.1.1071.6	Winner
0	99	NQYQALKPR	Deamidated(N)@1		0.0001	1117.59	2	14	1.1.1.1076.8	Winner
0	99	NQYQALKPR	Deamidated(N)@1		0.0001	1117.59	2	14	1.1.1.1082.6	Winner
0	98.5	NQYQALKPR	Deamidated(N)@1		0.0001	1117.59	2	9	1.1.1.1088.9	Winner
0	98.3	NQYQALKPR	Deamidated(N)@1		-0.001	1117.59	2	10	1.1.1.1014.5	Winner
0	97.7	NQYQALKPR	Deamidated(N)@1		-0.0008	1117.59	2	11	1.1.1.1025.6	Winner
0	95.3	NASRPMVIQESK	Deamidated(N)@1		-0.0008	1359.68	3	10	1.1.1.1058.3	Winner
0	80.4	NQYQALKPR	Deamidated(N)@1		-0.0008	1117.59	2	8	1.1.1.1031.10	Winner
0	53.8	NQYQALKPR	Deamidated(N)@1		-0.001	1117.59	2	9	1.1.1.999.6	Winner
0	97.1	NASRPMVIQESK	Deamidated(N)@1; Deamidated(R)@4; Oxidation(P)@5; Oxidation(M)@6		0.009	1392.66	2	11	1.1.1.1001.11	Winner
0	87.8	NASRPMVIQESK	Deamidated(N)@1; Deamidated(R)@4; Oxidation(P)@5; Oxidation(M)@6		0.009	1392.66	2	10	1.1.1.996.10	Winner
0	61.7	NASRPMVIQESK	Deamidated(N)@1; Deamidated(R)@4; Oxidation(P)@5; Oxidation(M)@6		0.009	1392.66	2	10	1.1.1.1006.8	Winner
0	99	NASRPMVIQESK	Deamidated(N)@1; Oxidation(M)@6		-0.0015	1375.67	3	14	1.1.1.973.4	Winner
0	99	NASRPMVIQESK	Deamidated(N)@1; Oxidation(M)@6		-0.0012	1375.68	3	15	1.1.1.990.4	Winner
0	99	NASRPMVIQESK	Deamidated(N)@1; Oxidation(M)@6		-0.0012	1375.68	3	17	1.1.1.996.3	Winner
0	99	NASRPMVIQESK	Deamidated(N)@1; Oxidation(M)@6		-0.0012	1375.68	3	16	1.1.1.1001.2	Winner
0	99	NASRPMVIQESK	Deamidated(N)@1; Oxidation(M)@6		-0.001	1375.68	3	14	1.1.1.1006.4	Winner
0	98.9	NASRPMVIQESK	Deamidated(N)@1; Oxidation(M)@6		-0.0015	1375.67	3	13	1.1.1.967.3	Winner
0	97.1	NASRPMVIQESK	Deamidated(N)@1; Oxidation(M)@6		-0.0015	1375.67	3	12	1.1.1.961.2	Winner
0	99	GSEQTTGAENEVETNALPVVSK	Deamidated(N)@10		0.0002	2260.07	3	28	1.1.1.1418.2	Winner
0	85.2	EIIDTANTTEMNSDHHSK	Deamidated(N)@12		0.0059	2042.89	4	11	1.1.1.1108.6	Winner
0	99	FTSQDASTPASSELNKQEK	Deamidated(N)@15	missed K-Q@16	0.0041	2067.96	3	16	1.1.1.1105.8	Winner
0	99	FTSQDASTPASSELNKQEK	Deamidated(N)@15	missed K-Q@16	-0.0012	2067.96	3	16	1.1.1.1161.5	Winner
0	99	FTSQDASTPASSELNKQEK	Deamidated(N)@15	missed K-Q@16	-0.0012	2067.96	3	16	1.1.1.1166.4	Winner
0	99	DLVKNEELEIQEK	Deamidated(N)@5	missed K-N@4	-0.0035	1586.8	3	13	1.1.1.1350.9	Winner
0	98.5	ESALNLPYHMPENK	Deamidated(N)@5; Oxidation(M)@10		0.0017	1658.76	3	13	1.1.1.1338.5	Winner
0	99	TGSLLNQPK	Deamidated(N)@6		0.001	957.514	2	13	1.1.1.1088.4	Winner
0	99	TGSLLNQPK	Deamidated(N)@6		0.0006	957.514	2	13	1.1.1.1094.4	Winner
0	97.8	TGSLLNQPK	Deamidated(N)@6		0.0008	957.514	2	12	1.1.1.1105.3	Winner
0	97.7	TGSLLNQPK	Deamidated(N)@6		0.0184	957.532	2	12	1.1.1.1041.6	Winner
0	86.6	TGSLLNQPK	Deamidated(N)@6		0.0008	957.514	2	9	1.1.1.1125.5	Winner
0	59.5	EMDKENNDGSSEIGK	Deamidated(N)@7	missed K-E@4	0.0026	1652.69	3	10	1.1.1.910.4	Winner
0	99	EIIDTANTTEMNSDHHSK	Deamidated(N)@7; Oxidation(M)@11		-0.0012	2058.88	4	16	1.1.1.1018.8	Winner
0	99	LAALSDHNPSAPR	Deamidated(N)@8		0.0038	1348.68	3	15	1.1.1.1114.5	Winner
0	99	LAALSDHNPSAPR	Deamidated(N)@8		0.0038	1348.68	3	14	1.1.1.1118.3	Winner
0	95.4	NPFEAIRPGSAQQVK	Deamidated(Q)@13		0.0005	1641.85	3	12	1.1.1.1353.5	Winner
0	15.1	NPFEAIRPGSAQQVK	Deamidated(Q)@13		0.0005	1641.85	3	9	1.1.1.1345.5	Winner
0	97.5	ETQIITGSDESCRK	Deamidated(Q)@3; Cys->Dha(C)@12	missed R-K@13	-0.0029	1532.73	3	10	1.1.1.1018.7	Winner
0	66.4	ETQIITGSDESCRK	Deamidated(Q)@3; Propionamide(C)@12	missed R-K@13	-0.0001	1637.76	3	10	1.1.1.1032.5	Winner
0	93.5	NQYQALKPR	Deamidated(Q)@4		-0.001	1117.59	2	10	1.1.1.1004.8	Winner
0	88.6	NQYQALKPR	Deamidated(Q)@4		-0.001	1117.59	2	10	1.1.1.1009.6	Winner
0.03	33.5	AKLQEAMK	Deamidated(Q)@4	missed K-L@2	-0.0022	918.482	2	7	1.1.1.875.2	Winner
0.1	65.5	EALKQLHSETQR	Deamidated(Q)@5	missed K-Q@4	-0.0019	1439.73	3	8	1.1.1.969.8	Winner
0	99	TGSLLNQPK	Deamidated(Q)@7		0.0008	957.514	2	14	1.1.1.1100.5	Winner
0	99	TGSLLNQPK	Deamidated(Q)@7		0.0008	957.514	2	13	1.1.1.1110.4	Winner
0	99	TGSLLNQPK	Deamidated(Q)@7		0.001	957.514	2	13	1.1.1.1120.4	Winner
0	98.1	TGSLLNQPK	Deamidated(Q)@7		0.001	957.514	2	12	1.1.1.1115.4	Winner
0	96.3	NEELEIQEK	Deamidated(Q)@7		0.0028	1131.53	2	12	1.1.1.1175.5	Winner
0	95.5	NEELEIQEK	Deamidated(Q)@7		0.0028	1131.53	2	11	1.1.1.1170.6	Winner
0.26	85.4	ELEALKQR	Deamidated(Q)@7	missed K-Q@6	-0.0017	986.538	2	9	1.1.1.1025.3	Winner
0	83.1	ELEALKQR	Deamidated(Q)@7	missed K-Q@6	-0.0017	986.538	2	8	1.1.1.1014.3	Winner
0	79.4	ELEALKQR	Deamidated(Q)@7	missed K-Q@6	-0.0017	986.538	2	8	1.1.1.1019.4	Winner
0	11.9	NASRPMVIQESK	Deamidated(Q)@9		-0.0011	1359.68	3	8	1.1.1.1019.3	Winner
0	74.4	TGSLLNQPK	Dehydrated(S)@3		-0.0018	938.517	2	8	1.1.1.1038.3	Winner
0	97.1	SSAVGPPEK	Delta:H(4)C(2)(K)@9		-0.0018	898.474	2	10	1.1.1.1021.3	Winner
0	94.4	SSAVGPPEK	Delta:H(4)C(2)(K)@9		-0.0018	898.474	2	10	1.1.1.1027.3	Winner
0	94.4	SSAVGPPEK	Delta:H(4)C(2)(K)@9		-0.0018	898.474	2	10	1.1.1.1033.3	Winner
0	91	SSAVGPPEK	Delta:H(4)C(2)(K)@9		-0.0016	898.475	2	9	1.1.1.1016.3	Winner
0.01	94.8	VEEPEQQNK	Delta:H(4)C(2)@N-term		0.0004	1127.55	2	12	1.1.1.899.5	Winner
0	89.5	VEEPEQQNK	Delta:H(4)C(2)@N-term		0.0004	1127.55	2	11	1.1.1.893.3	Winner
0	74.4	VEEPEQQNK	Delta:H(4)C(2)@N-term		0.0004	1127.55	2	9	1.1.1.905.6	Winner
0	3.7	ETQIITGSDESCRK	Dioxidation(C)@12	missed R-K@13	-0.0018	1597.72	3	9	1.1.1.1028.4	Winner
0	99	MGYFPTEEK	Dioxidation(M)@1		-0.0008	1132.47	2	12	1.1.1.1257.7	Winner
0	98.5	MGYFPTEEK	Dioxidation(M)@1		-0.0008	1132.47	2	11	1.1.1.1251.6	Winner
0	97.1	MGYFPTEEK	Dioxidation(M)@1		-0.003	1132.47	2	10	1.1.1.1245.8	Winner
0	97.1	MGYFPTEEK	Dioxidation(M)@1		-0.0003	1132.47	2	11	1.1.1.1263.6	Winner
0	96.5	MGYFPTEEK	Dioxidation(M)@1		-0.0002	1132.47	2	10	1.1.1.1270.5	Winner
0	99	ESALNLPYHMPENK	Dioxidation(M)@10		-0.0031	1673.77	3	14	1.1.1.1348.4	Winner
0	99	TVADSDESYMEK	Dioxidation(M)@10		-0.0025	1405.55	2	12	1.1.1.967.9	Winner
0	99	TVADSDESYMEK	Dioxidation(M)@10		-0.0025	1405.55	2	17	1.1.1.973.11	Winner
0	99	TVADSDESYMEK	Dioxidation(M)@10		-0.0025	1405.55	2	16	1.1.1.978.15	Winner
0	95.9	ESALNLPYHMPENK	Dioxidation(M)@10		-0.0031	1673.77	3	12	1.1.1.1343.4	Winner
0	99	EIIDTANTTEMNSDHHSK	Dioxidation(M)@11		-0.0053	2073.89	4	15	1.1.1.1003.6	Winner
0	99	EIIDTANTTEMNSDHHSK	Dioxidation(M)@11		-0.0043	2073.89	3	14	1.1.1.1004.10	Winner
0	97.9	EIIDTANTTEMNSDHHSK	Dioxidation(M)@11		-0.0053	2073.89	4	13	1.1.1.1003.5	Winner
0	97.9	EIIDTANTTEMNSDHHSK	Dioxidation(M)@11		-0.0053	2073.89	4	13	1.1.1.1009.5	Winner
0	99	DMGTDGKEELK	Dioxidation(M)@2	missed K-E@7	0.0019	1253.55	2	12	1.1.1.847.5	Winner
0	99	PMVIQESK	Dioxidation(M)@2	cleaved R-P@N-term	0.0014	962.476	2	10	1.1.1.922.6	Winner
0	89.5	EMDKENNDGSSEIGK	Dioxidation(M)@2	missed K-E@4	0.0001	1683.69	3	11	1.1.1.826.3	Winner
0	72.6	IHMKTMLDDDKR	Dioxidation(M)@3; Dethiomethyl(M)@6	missed K-T@4; missed K-R@11	0.0019	1485.73	3	11	1.1.1.677.2	Winner
0	99	DEKEMDKENNDGSSEIGK	Dioxidation(M)@5	missed K-E@3; missed K-E@7	-0.0006	2055.85	4	14	1.1.1.838.4	Winner
0	89.5	GPSFMTSPSPK	Dioxidation(M)@5		0.0237	1166.55	2	10	1.1.1.1087.7	Winner
0	99	RGPSFMTSPSPK	Dioxidation(M)@6	missed R-G@1	-0.0016	1322.63	3	12	1.1.1.1010.2	Winner
0	99	RGPSFMTSPSPK	Dioxidation(M)@6	missed R-G@1	-0.0013	1322.63	3	13	1.1.1.1015.2	Winner
0	95.9	RGPSFMTSPSPK	Dioxidation(M)@6	missed R-G@1	-0.0013	1322.63	3	9	1.1.1.1020.3	Winner
0	94.4	PMVIQESK	Formyl@N-term	cleaved R-P@N-term	0.0016	958.481	2	10	1.1.1.940.4	Winner
0	89.5	PMVIQESK	Formyl@N-term	cleaved R-P@N-term	0.0016	958.481	2	10	1.1.1.934.4	Winner
0	51	PMVIQESK	Formyl@N-term	cleaved R-P@N-term	-0.0003	958.479	2	8	1.1.1.928.6	Winner
0	99	PTCHGNAMALLK	Formyl@N-term; Dioxidation(C)@3; Oxidation(M)@8	cleaved R-P@N-term	-0.0007	1330.6	2	18	1.1.1.1159.4	Winner
0	99	PTCHGNAMALLK	Formyl@N-term; Dioxidation(C)@3; Oxidation(M)@8	cleaved R-P@N-term	-0.0007	1330.6	2	15	1.1.1.1164.9	Winner
0	99	PTCHGNAMALLK	Formyl@N-term; Dioxidation(C)@3; Oxidation(M)@8	cleaved R-P@N-term	-0.0007	1330.6	2	13	1.1.1.1169.8	Winner
1.96	99	QLGVDVSIKPR	Gln->pyro-Glu@N-term		-0.0012	1193.68	2	13	1.1.1.1562.3	Winner
1.54	98.3	QLHSETQR	Gln->pyro-Glu@N-term		-0.0003	980.467	2	12	1.1.1.874.2	Winner
0	98.2	QLHSETQR	Gln->pyro-Glu@N-term		-0.0003	980.467	2	12	1.1.1.862.4	Winner
0	98.2	QLHSETQR	Gln->pyro-Glu@N-term		-0.0003	980.467	2	12	1.1.1.868.4	Winner
0	98.1	QLHSETQR	Gln->pyro-Glu@N-term		-0.0005	980.467	2	10	1.1.1.886.6	Winner
0.09	97.7	QYQALKPR	Gln->pyro-Glu@N-term	cleaved N-Q@N-term	-0.0027	985.532	2	10	1.1.1.1196.3	Winner
0	97.1	QYQALKPR	Gln->pyro-Glu@N-term	cleaved N-Q@N-term	-0.0025	985.532	2	10	1.1.1.966.5	Winner
0	95.3	QLHSETQR	Gln->pyro-Glu@N-term		-0.0003	980.467	2	10	1.1.1.880.4	Winner
0	85.7	QYQALKPR	Gln->pyro-Glu@N-term	cleaved N-Q@N-term	-0.0025	985.532	2	8	1.1.1.960.3	Winner
0	84.2	QLHSETQR	Gln->pyro-Glu@N-term		-0.0007	980.467	2	9	1.1.1.892.2	Winner
0.15	98.8	EAIRPGSAQQVK	Glu->pyro-Glu@N-term	cleaved F-E@N-term	0.0004	1264.69	2	10	1.1.1.1057.8	Winner
0	99	EIIDTANTTEMNSDHHSK	Glu->pyro-Glu@N-term; Oxidation(M)@11		-0.0004	2039.88	3	13	1.1.1.1145.15	Winner
0	99	EMDKENNDGSSEIGK	Glu->pyro-Glu@N-term; Oxidation(M)@2	missed K-E@4	0.0008	1649.68	2	11	1.1.1.913.9	Winner
2	99	MGYFPTEEK	Oxidation(M)@1		-0.0001	1116.48	2	14	1.1.1.1228.6	Winner
2	99	MGYFPTEEKSETDENSGK	Oxidation(M)@1	missed K-S@9	-0.0016	2063.86	3	19	1.1.1.1158.10	Winner
0	99	MGYFPTEEK	Oxidation(M)@1		-0.0012	1116.48	2	11	1.1.1.1210.9	Winner
0	99	MGYFPTEEK	Oxidation(M)@1		-0.0001	1116.48	2	14	1.1.1.1216.6	Winner
0	99	MGYFPTEEK	Oxidation(M)@1		-0.0001	1116.48	2	13	1.1.1.1222.8	Winner
0	99	MGYFPTEEK	Oxidation(M)@1		-0.0001	1116.48	2	13	1.1.1.1234.5	Winner
0	99	MGYFPTEEK	Oxidation(M)@1		-0.0006	1116.48	2	13	1.1.1.1240.4	Winner
0	99	MGYFPTEEK	Oxidation(M)@1		-0.0007	1116.48	2	13	1.1.1.1246.3	Winner
0	99	MGYFPTEEKSETDENSGK	Oxidation(M)@1	missed K-S@9	-0.0012	2063.86	3	20	1.1.1.1164.11	Winner
0	99	MGYFPTEEKSETDENSGK	Oxidation(M)@1	missed K-S@9	-0.0012	2063.86	3	21	1.1.1.1169.10	Winner
0	99	MGYFPTEEKSETDENSGK	Oxidation(M)@1	missed K-S@9	-0.0012	2063.86	3	22	1.1.1.1174.8	Winner
0	99	MGYFPTEEKSETDENSGK	Oxidation(M)@1	missed K-S@9	-0.0012	2063.86	3	12	1.1.1.1179.9	Winner
0	98.9	MGYFPTEEK	Oxidation(M)@1		-0.0007	1116.48	2	12	1.1.1.1273.3	Winner
0	98.6	MGYFPTEEK	Oxidation(M)@1		-0.0009	1116.48	2	10	1.1.1.1265.4	Winner
0	98.5	MGYFPTEEK	Oxidation(M)@1		-0.0007	1116.48	2	11	1.1.1.1252.5	Winner
0	97.6	MGYFPTEEK	Oxidation(M)@1		-0.0003	1116.48	2	11	1.1.1.1279.3	Winner
0	83.3	MGYFPTEEK	Oxidation(M)@1		-0.0001	1116.48	2	9	1.1.1.1258.5	Winner
0	99	MGYFPTEEKSETDENSGK	Oxidation(M)@1; Deamidated(N)@15	missed K-S@9	0.0041	2064.85	3	18	1.1.1.1185.3	Winner
0	95.9	MGYFPTEEK	Oxidation(M)@1; Delta:H(4)C(2)(K)@9		0.0007	1144.51	2	12	1.1.1.1426.3	Winner
0	91	MGYFPTEEK	Oxidation(M)@1; Delta:H(4)C(2)(K)@9		-0.0002	1144.51	2	12	1.1.1.1433.3	Winner
0	56.6	MGYFPTEEK	Oxidation(M)@1; Delta:H(4)C(2)(K)@9		-0.0002	1144.51	2	9	1.1.1.1438.4	Winner
0	87.8	MGYFPTEEK	Oxidation(M)@1; Oxidation(F)@4		0.0001	1132.47	2	10	1.1.1.1065.5	Winner
0	18	MGYFPTEEK	Oxidation(M)@1; Oxidation(Y)@3		0.0008	1132.48	2	8	1.1.1.1057.6	Winner
2	99	ESALNLPYHMPENK	Oxidation(M)@10		-0.0001	1657.78	3	16	1.1.1.1322.5	Winner
0	99	ESALNLPYHMPENK	Oxidation(M)@10		-0.0001	1657.78	3	15	1.1.1.1302.3	Winner
0	99	ESALNLPYHMPENK	Oxidation(M)@10		-0.0001	1657.78	3	15	1.1.1.1307.5	Winner
0	99	ESALNLPYHMPENK	Oxidation(M)@10		-0.0001	1657.78	3	15	1.1.1.1312.5	Winner
0	99	ESALNLPYHMPENK	Oxidation(M)@10		-0.0001	1657.78	3	16	1.1.1.1317.3	Winner
0	99	ESALNLPYHMPENK	Oxidation(M)@10		-0.0001	1657.78	3	16	1.1.1.1328.3	Winner
0	99	TVADSDESYMEK	Oxidation(M)@10		0.0008	1389.56	2	13	1.1.1.929.4	Winner
0	99	TVADSDESYMEK	Oxidation(M)@10		0.0008	1389.56	2	15	1.1.1.935.6	Winner
0	99	TVADSDESYMEK	Oxidation(M)@10		-0.0004	1389.56	2	13	1.1.1.941.8	Winner
0	99	TVADSDESYMEK	Oxidation(M)@10		-0.0025	1389.56	2	21	1.1.1.947.6	Winner
0	99	TVADSDESYMEK	Oxidation(M)@10		-0.0023	1389.56	2	21	1.1.1.952.10	Winner
0	99	TVADSDESYMEK	Oxidation(M)@10		-0.0023	1389.56	2	21	1.1.1.958.11	Winner
0	99	TVADSDESYMEK	Oxidation(M)@10		-0.0023	1389.56	2	21	1.1.1.964.15	Winner
0	99	TVADSDESYMEK	Oxidation(M)@10		-0.0025	1389.56	2	20	1.1.1.970.9	Winner
0	99	TVADSDESYMEK	Oxidation(M)@10		-0.0023	1389.56	2	17	1.1.1.975.11	Winner
0	99	TVADSDESYMEK	Oxidation(M)@10		-0.0025	1389.56	2	11	1.1.1.980.11	Winner
0	99	TVADSDESYMEK	Oxidation(M)@10		-0.0025	1389.56	2	12	1.1.1.986.7	Winner
0	99	TVADSDESYMEK	Oxidation(M)@10		-0.0041	1389.56	2	13	1.1.1.994.3	Winner
0	99	TVADSDESYMEK	Oxidation(M)@10		-0.0026	1389.56	2	12	1.1.1.1022.6	Winner
0	97.9	ESALNLPYHMPENK	Oxidation(M)@10		-0.0003	1657.78	3	12	1.1.1.1333.3	Winner
0	60.9	TVADSDESYMEK	Oxidation(M)@10		-0.0029	1389.56	2	7	1.1.1.1058.9	Winner
0	17.8	ESALNLPYHMPENK	Oxidation(M)@10; Deamidated(N)@13		0.0017	1658.76	3	9	1.1.1.1345.6	Winner
0	99	TVADSDESYMEK	Oxidation(M)@10; Delta:H(4)C(2)(K)@12		0.0004	1417.59	2	12	1.1.1.1130.13	Winner
0	91	TVADSDESYMEK	Oxidation(M)@10; Delta:H(4)C(2)(K)@12		0.0004	1417.59	2	10	1.1.1.1125.12	Winner
2	99	EIIDTANTTEMNSDHHSK	Oxidation(M)@11		-0.0037	2057.89	4	18	1.1.1.990.7	Winner
0	99	EIIDTANTTEMNSDHHSK	Oxidation(M)@11		-0.0037	2057.89	4	21	1.1.1.978.10	Winner
0	99	EIIDTANTTEMNSDHHSK	Oxidation(M)@11		-0.0037	2057.89	4	20	1.1.1.984.10	Winner
0	24.8	EIIDTANTTEMNSDHHSK	Oxidation(M)@11		-0.004	2057.89	4	9	1.1.1.973.8	Winner
0	99	EIIDTANTTEMNSDHHSK	Oxidation(M)@11; Deamidated(N)@12		0.0027	2058.88	4	16	1.1.1.996.5	Winner
0	99	EIIDTANTTEMNSDHHSK	Oxidation(M)@11; Deamidated(N)@12		-0.0006	2058.88	3	19	1.1.1.997.13	Winner
0	99	EIIDTANTTEMNSDHHSK	Oxidation(M)@11; Deamidated(N)@12		-0.0035	2058.88	3	14	1.1.1.1008.10	Winner
0	98.3	EIIDTANTTEMNSDHHSK	Oxidation(M)@11; Deamidated(N)@12		0.0027	2058.88	4	13	1.1.1.1002.11	Winner
0	98.3	EIIDTANTTEMNSDHHSK	Oxidation(M)@11; Deamidated(N)@12		-0.001	2058.88	4	12	1.1.1.1007.11	Winner
0	94.8	EIIDTANTTEMNSDHHSK	Oxidation(M)@11; Deamidated(N)@12		-0.0012	2058.88	4	12	1.1.1.1013.8	Winner
2	99	DMGTDGKEELK	Oxidation(M)@2	missed K-E@7	-0.0003	1237.55	3	14	1.1.1.828.2	Winner
2	99	DMGTDGKEELKADVVPVTLAPK	Oxidation(M)@2	missed K-E@7; missed K-A@11	-0.0026	2328.19	4	19	1.1.1.1521.3	Winner
2	99	EMDKENNDGSSEIGK	Oxidation(M)@2	missed K-E@4	-0.002	1667.69	3	19	1.1.1.816.3	Winner
2	99	PMVIQESK	Oxidation(M)@2	cleaved R-P@N-term	0.0006	946.48	2	13	1.1.1.895.7	Winner
0	99	DMGTDGKEELK	Oxidation(M)@2	missed K-E@7	-0.0003	1237.55	3	13	1.1.1.834.2	Winner
0	99	DMGTDGKEELK	Oxidation(M)@2	missed K-E@7	-0.0003	1237.55	3	13	1.1.1.840.2	Winner
0	99	DMGTDGKEELKADVVPVTLAPK	Oxidation(M)@2	missed K-E@7; missed K-A@11	-0.0021	2328.19	4	19	1.1.1.1532.3	Winner
0	99	DMGTDGKEELKADVVPVTLAPK	Oxidation(M)@2	missed K-E@7; missed K-A@11	-0.0021	2328.19	4	21	1.1.1.1537.2	Winner
0	99	EMDKENNDGSSEIGK	Oxidation(M)@2	missed K-E@4	-0.002	1667.69	3	15	1.1.1.810.2	Winner
0	99	EMDKENNDGSSEIGK	Oxidation(M)@2	missed K-E@4	-0.002	1667.69	3	15	1.1.1.822.2	Winner
0	99	PMVIQESK	Oxidation(M)@2	cleaved R-P@N-term	0.0006	946.48	2	13	1.1.1.883.5	Winner
0	99	PMVIQESK	Oxidation(M)@2	cleaved R-P@N-term	0.0006	946.48	2	13	1.1.1.889.5	Winner
0	98.3	PMVIQESK	Oxidation(M)@2	cleaved R-P@N-term	0.0006	946.48	2	10	1.1.1.877.5	Winner
0	87.9	PMVIQESK	Oxidation(M)@2	cleaved R-P@N-term	0.0006	946.48	2	7	1.1.1.901.5	Winner
0	75.5	PMVIQESK	Oxidation(M)@2	cleaved R-P@N-term	-0.0022	946.477	2	7	1.1.1.962.7	Winner
0	55.5	PMVIQESK	Oxidation(M)@2	cleaved R-P@N-term	-0.0024	946.477	2	8	1.1.1.921.2	Winner
0	18.8	PMVIQESK	Oxidation(M)@2	cleaved R-P@N-term	-0.0151	946.464	2	7	1.1.1.907.6	Winner
0	11.2	PMVIQESK	Oxidation(M)@2	cleaved R-P@N-term	0.0036	946.483	2	6	1.1.1.1012.8	Winner
0	99	EMDKENNDGSSEIGK	Oxidation(M)@2; Deamidated(N)@6	missed K-E@4	-0.0011	1668.68	3	15	1.1.1.839.3	Winner
0	98.6	EMDKENNDGSSEIGK	Oxidation(M)@2; Deamidated(N)@6	missed K-E@4	-0.0011	1668.68	3	13	1.1.1.833.5	Winner
0.4	97.3	SFMTSPSPK	Oxidation(M)@3	cleaved P-S@N-term	0.0022	996.461	2	9	1.1.1.945.5	Winner
0	95.9	SFMTSPSPK	Oxidation(M)@3	cleaved P-S@N-term	0.0022	996.461	2	11	1.1.1.939.4	Winner
0	89.5	SFMTSPSPK	Oxidation(M)@3	cleaved P-S@N-term	0.0022	996.461	2	10	1.1.1.933.3	Winner
0	99	ENMEELLNLCSGK	Oxidation(M)@3; Cys->Dha(C)@10		0.0014	1460.68	2	13	1.1.1.1556.3	Winner
0	97.1	ENMEELLNLCSGK	Oxidation(M)@3; Cys->Dha(C)@10		0.0014	1460.68	2	12	1.1.1.1550.2	Winner
1.48	99	ENMEELLNLCSGK	Oxidation(M)@3; Trioxidation(C)@10		0.0004	1542.65	2	21	1.1.1.1558.3	Winner
0	99	ENMEELLNLCSGK	Oxidation(M)@3; Trioxidation(C)@10		0.0004	1542.65	2	20	1.1.1.1564.7	Winner
0	99	ENMEELLNLCSGK	Oxidation(M)@3; Trioxidation(C)@10		0.0004	1542.65	2	21	1.1.1.1570.5	Winner
0	99	ENMEELLNLCSGK	Oxidation(M)@3; Trioxidation(C)@10		0.0001	1542.65	2	19	1.1.1.1577.4	Winner
1.66	99	SRPMVIQESK	Oxidation(M)@4	cleaved A-S@N-term	-0.002	1189.61	2	16	1.1.1.911.5	Winner
0	99	SRPMVIQESK	Oxidation(M)@4	cleaved A-S@N-term	-0.002	1189.61	2	12	1.1.1.905.7	Winner
0	97.1	SRPMVIQESK	Oxidation(M)@4	cleaved A-S@N-term	-0.002	1189.61	2	10	1.1.1.917.7	Winner
0.1	88.7	GNAMALLK	Oxidation(M)@4	cleaved H-G@N-term	-0.0029	832.445	2	6	1.1.1.1035.3	Winner
1.49	99	KENMEELLNLCSGK	Oxidation(M)@4; Trioxidation(C)@11	missed K-E@1	-0.0004	1670.75	2	23	1.1.1.1382.2	Winner
0	99	KENMEELLNLCSGK	Oxidation(M)@4; Trioxidation(C)@11	missed K-E@1	-0.0001	1670.75	2	22	1.1.1.1392.2	Winner
2	99	DEKEMDKENNDGSSEIGK	Oxidation(M)@5	missed K-E@3; missed K-E@7	-0.0039	2039.86	4	20	1.1.1.831.2	Winner
1.37	99	HGNAMALLK	Oxidation(M)@5	cleaved C-H@N-term	-0.0019	969.505	2	12	1.1.1.912.3	Winner
1.04	99	ASRPMVIQESK	Oxidation(M)@5	cleaved N-A@N-term	0.0003	1260.65	3	13	1.1.1.900.2	Winner
0	99	DEKEMDKENNDGSSEIGK	Oxidation(M)@5	missed K-E@3; missed K-E@7	-0.0039	2039.86	4	16	1.1.1.825.2	Winner
0	99	DEKEMDKENNDGSSEIGK	Oxidation(M)@5	missed K-E@3; missed K-E@7	-0.0039	2039.86	4	17	1.1.1.837.2	Winner
0	99	GPSFMTSPSPK	Oxidation(M)@5		0.0005	1150.53	2	12	1.1.1.1046.4	Winner
0	99	GPSFMTSPSPK	Oxidation(M)@5		0.0005	1150.53	2	19	1.1.1.1052.3	Winner
0	99	GPSFMTSPSPK	Oxidation(M)@5		0.0005	1150.53	2	19	1.1.1.1058.5	Winner
0	99	GPSFMTSPSPK	Oxidation(M)@5		0.0005	1150.53	2	19	1.1.1.1064.5	Winner
0	99	GPSFMTSPSPK	Oxidation(M)@5		0.0005	1150.53	2	19	1.1.1.1070.4	Winner
0	99	GPSFMTSPSPK	Oxidation(M)@5		0.0005	1150.53	2	16	1.1.1.1075.7	Winner
0	99	GPSFMTSPSPK	Oxidation(M)@5		0.0007	1150.53	2	14	1.1.1.1081.6	Winner
0	99	GPSFMTSPSPK	Oxidation(M)@5		0.0007	1150.53	2	10	1.1.1.1087.6	Winner
0	99	HGNAMALLK	Oxidation(M)@5	cleaved C-H@N-term	-0.0001	969.506	2	10	1.1.1.918.4	Winner
0	98.2	GPSFMTSPSPK	Oxidation(M)@5		-0.0021	1150.53	2	9	1.1.1.1009.7	Winner
0	97.1	ASRPMVIQESK	Oxidation(M)@5	cleaved N-A@N-term	0.0003	1260.65	3	12	1.1.1.894.3	Winner
0	99	DEKEMDKENNDGSSEIGK	Oxidation(M)@5; Deamidated(N)@9	missed K-E@3; missed K-E@7	0.0004	2040.84	4	16	1.1.1.843.5	Winner
0	99	DEKEMDKENNDGSSEIGK	Oxidation(M)@5; Deamidated(N)@9	missed K-E@3; missed K-E@7	0.0017	2040.84	3	25	1.1.1.844.4	Winner
0	99	DEKEMDKENNDGSSEIGK	Oxidation(M)@5; Deamidated(N)@9	missed K-E@3; missed K-E@7	0.0017	2040.84	3	19	1.1.1.850.8	Winner
0	98.9	DEKEMDKENNDGSSEIGK	Oxidation(M)@5; Deamidated(N)@9	missed K-E@3; missed K-E@7	0.0015	2040.84	3	12	1.1.1.857.5	Winner
0	99	GPSFMTSPSPK	Oxidation(M)@5; Phospho(S)@7		-0.0008	1230.5	2	12	1.1.1.1190.9	Winner
0	99	GPSFMTSPSPK	Oxidation(M)@5; Phospho(S)@7		-0.003	1230.5	2	12	1.1.1.1259.7	Winner
0	99	GPSFMTSPSPK	Oxidation(M)@5; Phospho(S)@7		-0.0013	1230.5	2	12	1.1.1.1272.5	Winner
0	97.3	GPSFMTSPSPK	Oxidation(M)@5; Phospho(S)@7		0.0011	1230.5	2	11	1.1.1.1246.5	Winner
0	88.7	GPSFMTSPSPK	Oxidation(M)@5; Phospho(S)@7		-0.0014	1230.5	2	8	1.1.1.1200.15	Winner
0	99	GPSFMTSPSPK	Oxidation(M)@5; Phospho(S)@9		0.0011	1230.5	2	12	1.1.1.1252.7	Winner
0	99	GPSFMTSPSPK	Oxidation(M)@5; Phospho(S)@9		0.0015	1230.5	2	12	1.1.1.1265.7	Winner
0	99	GPSFMTSPSPK	Oxidation(M)@5; Phospho(S)@9		-0.0011	1230.5	2	14	1.1.1.1280.2	Winner
0	92.5	GPSFMTSPSPK	Oxidation(M)@5; Phospho(S)@9		-0.0011	1230.5	2	10	1.1.1.1239.8	Winner
0	84.2	GPSFMTSPSPK	Oxidation(M)@5; Phospho(S)@9		0.0014	1230.5	2	10	1.1.1.1326.5	Winner
0	41.2	GPSFMTSPSPK	Oxidation(M)@5; Phospho(S)@9		-0.0011	1230.5	2	7	1.1.1.1298.10	Winner
0	99	NASRPMVIQESK	Oxidation(M)@6		0.0012	1374.69	3	13	1.1.1.902.8	Winner
0	99	NASRPMVIQESK	Oxidation(M)@6		0.0012	1374.69	3	15	1.1.1.908.7	Winner
0	99	NASRPMVIQESK	Oxidation(M)@6		0.0012	1374.69	3	16	1.1.1.914.4	Winner
0	99	NASRPMVIQESK	Oxidation(M)@6		0.0012	1374.69	3	13	1.1.1.920.2	Winner
0	99	RGPSFMTSPSPK	Oxidation(M)@6	missed R-G@1	-0.0006	1306.63	3	15	1.1.1.986.2	Winner
0	99	RGPSFMTSPSPK	Oxidation(M)@6	missed R-G@1	-0.0006	1306.63	3	14	1.1.1.992.4	Winner
0	99	RGPSFMTSPSPK	Oxidation(M)@6	missed R-G@1	-0.0006	1306.63	3	13	1.1.1.997.6	Winner
0	98.5	RGPSFMTSPSPK	Oxidation(M)@6	missed R-G@1	0	1306.63	3	12	1.1.1.1002.7	Winner
0	98.1	NASRPMVIQESK	Oxidation(M)@6		0.0012	1374.69	3	12	1.1.1.926.2	Winner
0	97	RGPSFMTSPSPK	Oxidation(M)@6	missed R-G@1	-0.0003	1306.63	3	11	1.1.1.1007.8	Winner
0	94.6	RGPSFMTSPSPK	Oxidation(M)@6	missed R-G@1	-0.0009	1306.63	3	11	1.1.1.980.4	Winner
0	87.3	RGPSFMTSPSPK	Oxidation(M)@6	missed R-G@1	0	1306.63	3	9	1.1.1.932.2	Winner
0	68.7	RGPSFMTSPSPK	Oxidation(M)@6	missed R-G@1	-0.0006	1306.63	3	8	1.1.1.1012.6	Winner
0	55.5	NASRPMVIQESK	Oxidation(M)@6		-0.0066	1374.69	3	9	1.1.1.955.3	Winner
0	54.2	NASRPMVIQESK	Oxidation(M)@6		-0.0096	1374.68	3	8	1.1.1.984.7	Winner
0	41	NASRPMVIQESK	Oxidation(M)@6		0.0012	1374.69	3	9	1.1.1.896.4	Winner
0	39	NASRPMVIQESK	Oxidation(M)@6		-0.0019	1374.69	3	9	1.1.1.943.4	Winner
0	18.9	NASRPMVIQESK	Oxidation(M)@6		-0.0019	1374.69	3	8	1.1.1.949.5	Winner
0	16.6	NASRPMVIQESK	Oxidation(M)@6		0.0117	1374.7	3	6	1.1.1.978.7	Winner
0	99	NASRPMVIQESK	Oxidation(M)@6; Deamidated(Q)@9		0.003	1375.68	3	14	1.1.1.937.3	Winner
0	54.5	NASRPMVIQESK	Oxidation(M)@6; Deamidated(Q)@9		0.0027	1375.68	2	8	1.1.1.931.8	Winner
0	85.7	RGPSFMTSPSPK	Oxidation(M)@6; Dehydrated(T)@7	missed R-G@1	0.0001	1288.62	3	8	1.1.1.990.2	Winner
0	65.7	RGPSFMTSPSPK	Oxidation(M)@6; Phospho(S)@10	missed R-G@1	0.002	1386.6	3	7	1.1.1.1141.5	Winner
0	11.2	RGPSFMTSPSPK	Oxidation(M)@6; Phospho(S)@10	missed R-G@1	-0.0005	1386.6	2	6	1.1.1.1156.10	Winner
2	99	KRGPSFMTSPSPK	Oxidation(M)@7	missed K-R@1; missed R-G@2	-0.0009	1434.73	3	17	1.1.1.899.3	Winner
0	99	KRGPSFMTSPSPK	Oxidation(M)@7	missed K-R@1; missed R-G@2	-0.0006	1434.73	3	13	1.1.1.887.3	Winner
0	99	KRGPSFMTSPSPK	Oxidation(M)@7	missed K-R@1; missed R-G@2	-0.0009	1434.73	3	15	1.1.1.893.2	Winner
0	98.1	KRGPSFMTSPSPK	Oxidation(M)@7	missed K-R@1; missed R-G@2	-0.0009	1434.73	3	12	1.1.1.905.3	Winner
0	95.1	KRGPSFMTSPSPK	Oxidation(M)@7; Phospho(T)@8	missed K-R@1; missed R-G@2	-0.0026	1514.69	3	11	1.1.1.967.7	Winner
2	99	NIDDASQMDLFHR	Oxidation(M)@8		-0.001	1576.69	3	14	1.1.1.1336.4	Winner
0	99	NIDDASQMDLFHR	Oxidation(M)@8		-0.001	1576.69	3	14	1.1.1.1325.2	Winner
0	99	NIDDASQMDLFHR	Oxidation(M)@8		-0.001	1576.69	3	14	1.1.1.1331.3	Winner
0.81	99	KPRPTCHGNAMALLK	Oxidation(P)@4; Dioxidation(C)@6; Oxidation(M)@11		-0.0038	1699.85	3	22	1.1.1.977.7	Winner
0	99	KPRPTCHGNAMALLK	Oxidation(P)@4; Dioxidation(C)@6; Oxidation(M)@11		-0.0038	1699.85	3	16	1.1.1.972.6	Winner
0	91	NASRPMVIQESK	Oxidation(P)@5; Oxidation(M)@6		0.0014	1390.69	3	11	1.1.1.940.3	Winner
0	83.4	NASRPMVIQESK	Oxidation(P)@5; Oxidation(M)@6		0.0014	1390.69	3	10	1.1.1.934.3	Winner
0.02	68.6	EQWLRDMAQQGK	Oxidation(W)@3; Oxidation(M)@7	missed R-D@5	-0.0026	1520.7	3	10	1.1.1.965.3	Winner
2	99	SPSPGLFR	Phospho(S)@3		0.0001	939.422	2	11	1.1.1.1427.3	Winner
0	99	SPSPGLFR	Phospho(S)@3		-0.0023	939.419	2	12	1.1.1.1621.3	Winner
0	99	SPSPGLFR	Phospho(S)@3		0.0004	939.422	2	11	1.1.1.1681.3	Winner
0	99	SPSPGLFR	Phospho(S)@3		0.0004	939.422	2	11	1.1.1.1708.3	Winner
0	99	SPSPGLFR	Phospho(S)@3		0.0005	939.422	2	12	1.1.1.1917.2	Winner
0	99	SPSPGLFR	Phospho(S)@3		0.0012	939.423	2	11	1.1.1.1968.2	Winner
0	99	SPSPGLFR	Phospho(S)@3		-0.0002	939.421	2	12	1.1.1.2033.2	Winner
0	98.6	SPSPGLFR	Phospho(S)@3		0.0007	939.422	2	10	1.1.1.1434.3	Winner
0	98.6	SPSPGLFR	Phospho(S)@3		0.0004	939.422	2	11	1.1.1.1654.3	Winner
0	98.6	SPSPGLFR	Phospho(S)@3		-0.0001	939.421	2	11	1.1.1.1811.2	Winner
0	98.6	SPSPGLFR	Phospho(S)@3		0.0001	939.422	2	11	1.1.1.1901.2	Winner
0	98.5	SPSPGLFR	Phospho(S)@3		0.0005	939.422	2	12	1.1.1.1477.2	Winner
0	98.5	SPSPGLFR	Phospho(S)@3		-0.0001	939.421	2	12	1.1.1.1576.4	Winner
0	98.5	SPSPGLFR	Phospho(S)@3		-0.0021	939.419	2	11	1.1.1.1750.2	Winner
0	98.4	SPSPGLFR	Phospho(S)@3		0.0005	939.422	2	12	1.1.1.1483.2	Winner
0	98.4	SPSPGLFR	Phospho(S)@3		0.0004	939.422	2	12	1.1.1.1501.2	Winner
0	98.4	SPSPGLFR	Phospho(S)@3		0.0004	939.422	2	12	1.1.1.1517.3	Winner
0	98.4	SPSPGLFR	Phospho(S)@3		0.0001	939.422	2	11	1.1.1.1552.4	Winner
0	98.4	SPSPGLFR	Phospho(S)@3		-0.0002	939.421	2	11	1.1.1.1774.2	Winner
0	98.3	SPSPGLFR	Phospho(S)@3		0.0004	939.422	2	12	1.1.1.1445.3	Winner
0	98.3	SPSPGLFR	Phospho(S)@3		0.0005	939.422	2	12	1.1.1.1456.3	Winner
0	98.3	SPSPGLFR	Phospho(S)@3		0.0005	939.422	2	12	1.1.1.1461.2	Winner
0	98.3	SPSPGLFR	Phospho(S)@3		0.0004	939.422	2	12	1.1.1.1491.2	Winner
0	98.3	SPSPGLFR	Phospho(S)@3		-0.0017	939.42	2	12	1.1.1.1496.2	Winner
0	98.3	SPSPGLFR	Phospho(S)@3		-0.0001	939.421	2	12	1.1.1.1538.3	Winner
0	98.3	SPSPGLFR	Phospho(S)@3		-0.0001	939.421	2	11	1.1.1.1610.3	Winner
0	98.3	SPSPGLFR	Phospho(S)@3		0.0001	939.422	2	11	1.1.1.2096.2	Winner
0	98.2	SPSPGLFR	Phospho(S)@3		0.0005	939.422	2	12	1.1.1.1506.3	Winner
0	98.2	SPSPGLFR	Phospho(S)@3		0.0001	939.422	2	11	1.1.1.1599.3	Winner
0	98.2	SPSPGLFR	Phospho(S)@3		0.0007	939.422	2	11	1.1.1.1670.3	Winner
0	98.1	SPSPGLFR	Phospho(S)@3		0.0004	939.422	2	11	1.1.1.1930.2	Winner
0	97.9	SPSPGLFR	Phospho(S)@3		-0.0019	939.42	2	11	1.1.1.1795.2	Winner
0	97.9	SPSPGLFR	Phospho(S)@3		0.0004	939.422	2	10	1.1.1.2075.2	Winner
0	97.8	SPSPGLFR	Phospho(S)@3		0.0004	939.422	2	11	1.1.1.1557.3	Winner
0	97.8	SPSPGLFR	Phospho(S)@3		-0.0017	939.42	2	11	1.1.1.1588.3	Winner
0	97.8	SPSPGLFR	Phospho(S)@3		0.0005	939.422	2	10	1.1.1.2045.2	Winner
0	97.7	SPSPGLFR	Phospho(S)@3		0.0001	939.422	2	11	1.1.1.1729.2	Winner
0	97.5	SPSPGLFR	Phospho(S)@3		-0.0002	939.421	2	11	1.1.1.1637.3	Winner
0	97.2	SPSPGLFR	Phospho(S)@3		0.0009	939.423	2	11	1.1.1.1563.3	Winner
0	96.9	SPSPGLFR	Phospho(S)@3		0.0004	939.422	2	11	1.1.1.1440.3	Winner
0	96.9	SPSPGLFR	Phospho(S)@3		0.0001	939.422	2	10	1.1.1.1859.2	Winner
0	96.4	SPSPGLFR	Phospho(S)@3		0.0001	939.422	2	10	1.1.1.1838.2	Winner
0	96.3	SPSPGLFR	Phospho(S)@3		0.0005	939.422	2	11	1.1.1.1569.3	Winner
0	96.2	SPSPGLFR	Phospho(S)@3		-0.0001	939.421	2	11	1.1.1.1533.3	Winner
0	96.2	SPSPGLFR	Phospho(S)@3		0.0001	939.422	2	10	1.1.1.1880.2	Winner
0	95.9	SPSPGLFR	Phospho(S)@3		0.0004	939.422	2	11	1.1.1.1522.3	Winner
0	94.7	SPSPGLFR	Phospho(S)@3		0.0019	939.423	2	10	1.1.1.1946.2	Winner
0	94.2	SPSPGLFR	Phospho(S)@3		0.0001	939.422	2	9	1.1.1.2160.2	Winner
0	93	SPSPGLFR	Phospho(S)@3		-0.0001	939.421	2	10	1.1.1.2000.2	Winner
0	92.8	SPSPGLFR	Phospho(S)@3		0.0001	939.422	2	9	1.1.1.2063.2	Winner
0	88.4	SPSPGLFR	Phospho(S)@3		0.0005	939.422	2	9	1.1.1.2016.2	Winner
0	85.6	SPSPGLFR	Phospho(S)@3		-0.0001	939.421	2	8	1.1.1.2127.2	Winner
0	94.2	GPSFMTSPSPK	Phospho(S)@3; Oxidation(M)@5		-0.0039	1230.5	2	11	1.1.1.1206.4	Winner
0	73.1	NASRPMVIQESK	Phospho(S)@3; Oxidation(M)@6		-0.0019	1454.66	3	8	1.1.1.1024.8	Winner
0	89.3	KRGPSFMTSPSPK	Phospho(S)@5; Oxidation(M)@7	missed K-R@1; missed R-G@2	-0.0026	1514.69	3	9	1.1.1.973.7	Winner
0	83.5	KRGPSFMTSPSPK	Phospho(S)@5; Oxidation(M)@7	missed K-R@1; missed R-G@2	-0.0026	1514.69	3	9	1.1.1.961.6	Winner
2	99	NFVFHTLSPVK	Phospho(S)@8		0.0023	1367.67	2	17	1.1.1.1969.2	Winner
2	99	NFVFHTLSPVKAEAAK	Phospho(S)@8	missed K-A@11	-0.0027	1837.91	3	18	1.1.1.1624.2	Winner
0	99	NFVFHTLSPVK	Phospho(S)@8		0.0021	1367.67	2	16	1.1.1.1985.4	Winner
0	99	NFVFHTLSPVK	Phospho(S)@8		0.0023	1367.67	2	16	1.1.1.2001.3	Winner
0	99	NFVFHTLSPVK	Phospho(S)@8		0.002	1367.67	2	16	1.1.1.2017.3	Winner
0	99	NFVFHTLSPVKAEAAK	Phospho(S)@8	missed K-A@11	-0.0018	1837.91	3	18	1.1.1.1640.2	Winner
0	99	NFVFHTLSPVKAEAAK	Phospho(S)@8	missed K-A@11	-0.002	1837.91	3	19	1.1.1.1656.2	Winner
0	99	NFVFHTLSPVKAEAAK	Phospho(S)@8	missed K-A@11	-0.0018	1837.91	3	19	1.1.1.1676.2	Winner
0	47.9	ASLVSSASK	Phospho(S)@8		0.0002	928.427	2	5	1.1.1.964.7	Winner
0	70	ETQIITGSDESCRK	Phospho(T)@2	missed R-K@13	-0.0068	1645.7	2	6	1.1.1.1063.9	Winner
1.33	95.3	RFTLDR	Phospho(T)@3	missed R-F@1	0.0014	886.408	2	9	1.1.1.1150.2	Winner
0	94	RFTLDR	Phospho(T)@3	missed R-F@1	0.0012	886.408	2	9	1.1.1.1156.4	Winner
0	70.6	RFTLDR	Phospho(T)@3	missed R-F@1	0.0016	886.408	2	9	1.1.1.1144.2	Winner
0	64	RFTLDR	Phospho(T)@3	missed R-F@1	-0.0006	886.406	2	8	1.1.1.1182.3	Winner
0	60.2	RFTLDR	Phospho(T)@3	missed R-F@1	0.0016	886.408	2	9	1.1.1.1138.3	Winner
0	59.2	RFTLDR	Phospho(T)@3	missed R-F@1	0.0014	886.408	2	8	1.1.1.1132.2	Winner
0	54.2	RFTLDR	Phospho(T)@3	missed R-F@1	0.0012	886.408	2	8	1.1.1.1162.3	Winner
0	52.2	RFTLDR	Phospho(T)@3	missed R-F@1	-0.0006	886.406	2	7	1.1.1.1172.4	Winner
0	50.6	RFTLDR	Phospho(T)@3	missed R-F@1	-0.0006	886.406	2	7	1.1.1.1177.3	Winner
0	39.2	RFTLDR	Phospho(T)@3	missed R-F@1	-0.0006	886.406	2	7	1.1.1.1167.3	Winner
0	22.8	RFTLDR	Phospho(T)@3	missed R-F@1	-0.0004	886.406	2	6	1.1.1.1187.4	Winner
0	18.1	RFTLDR	Phospho(T)@3	missed R-F@1	-0.0008	886.405	2	6	1.1.1.1197.3	Winner
2	99	ETQIITGSDESCR	Propionamide(C)@12		0.0021	1508.68	2	15	1.1.1.1102.6	Winner
0	99	ETQIITGSDESCR	Propionamide(C)@12		0.0021	1508.68	2	19	1.1.1.1107.7	Winner
0	99	ETQIITGSDESCR	Propionamide(C)@12		0.0021	1508.68	2	21	1.1.1.1112.6	Winner
0	99	ETQIITGSDESCR	Propionamide(C)@12		0.0021	1508.68	2	15	1.1.1.1117.8	Winner
0	99	ETQIITGSDESCRK	Propionamide(C)@12	missed R-K@13	-0.0043	1636.77	3	14	1.1.1.998.6	Winner
0	99	ETQIITGSDESCRK	Propionamide(C)@12	missed R-K@13	-0.0043	1636.77	3	15	1.1.1.1003.8	Winner
0	99	ETQIITGSDESCRK	Propionamide(C)@12	missed R-K@13	-0.0043	1636.77	3	14	1.1.1.1008.9	Winner
0	99	ETQIITGSDESCRK	Propionamide(C)@12	missed R-K@13	-0.0043	1636.77	3	14	1.1.1.1013.10	Winner
0	98.2	ETQIITGSDESCRK	Propionamide(C)@12	missed R-K@13	-0.0039	1636.77	3	12	1.1.1.993.7	Winner
2	99	LDEDDSCSLLTK	Propionamide(C)@7		-0.0014	1408.64	2	13	1.1.1.1339.8	Winner
1.14	99	QPSKLDEDDSCSLLTK	Trioxidation(C)@11	missed K-L@4	0.0001	1825.83	2	16	1.1.1.1287.6	Winner
1.43	99	ETQIITGSDESCRK	Trioxidation(C)@12	missed R-K@13	-0.001	1613.72	2	23	1.1.1.1026.8	Winner
0	99	ETQIITGSDESCR	Trioxidation(C)@12		0.0011	1485.63	2	13	1.1.1.1119.16	Winner
0	99	ETQIITGSDESCR	Trioxidation(C)@12		0.0011	1485.63	2	16	1.1.1.1124.10	Winner
0	99	ETQIITGSDESCR	Trioxidation(C)@12		0.0011	1485.63	2	13	1.1.1.1129.11	Winner
0	99	ETQIITGSDESCRK	Trioxidation(C)@12	missed R-K@13	-0.001	1613.72	2	20	1.1.1.1020.10	Winner
0	99	ETQIITGSDESCRK	Trioxidation(C)@12	missed R-K@13	-0.001	1613.72	2	18	1.1.1.1032.6	Winner
0	95.9	ETQIITGSDESCRK	Trioxidation(C)@12	missed R-K@13	-0.0031	1613.72	3	12	1.1.1.1026.7	Winner
0	99	ETQIITGSDESCR	Trioxidation(C)@12; Dimethyl(R)@13		-0.0193	1513.64	2	14	1.1.1.1189.8	Winner
0	99	ETQIITGSDESCR	Trioxidation(C)@12; Dimethyl(R)@13		-0.0193	1513.64	2	14	1.1.1.1194.10	Winner
0	99	ETQIITGSDESCR	Trioxidation(C)@12; Dimethyl(R)@13		-0.0193	1513.64	2	12	1.1.1.1199.14	Winner
0	99	PTCHGNAMALLK	Trioxidation(C)@3; Dioxidation(M)@8	cleaved R-P@N-term	-0.0007	1334.6	2	17	1.1.1.1169.9	Winner
0	99	PTCHGNAMALLK	Trioxidation(C)@3; Dioxidation(M)@8	cleaved R-P@N-term	-0.0007	1334.6	2	18	1.1.1.1174.7	Winner
0	97.1	PTCHGNAMALLK	Trioxidation(C)@3; Dioxidation(M)@8	cleaved R-P@N-term	-0.0007	1334.6	2	11	1.1.1.1164.10	Winner
1.17	99	PTCHGNAMALLK	Trioxidation(C)@3; Oxidation(M)@8	cleaved R-P@N-term	-0.0005	1318.6	2	19	1.1.1.1122.10	Winner
0	99	PTCHGNAMALLK	Trioxidation(C)@3; Oxidation(M)@8	cleaved R-P@N-term	-0.0007	1318.6	2	16	1.1.1.1117.5	Winner
0	99	PTCHGNAMALLK	Trioxidation(C)@3; Oxidation(M)@8	cleaved R-P@N-term	-0.0005	1318.6	2	21	1.1.1.1127.11	Winner
0	99	PTCHGNAMALLK	Trioxidation(C)@3; Oxidation(M)@8	cleaved R-P@N-term	-0.0005	1318.6	2	18	1.1.1.1133.13	Winner
0	99	PTCHGNAMALLK	Trioxidation(C)@3; Oxidation(M)@8	cleaved R-P@N-term	0.0017	1318.6	2	15	1.1.1.1139.13	Winner
0	99	KPRPTCHGNAMALLK	Trioxidation(C)@6; Dioxidation(M)@11		-0.0042	1715.84	3	15	1.1.1.1005.3	Winner
0	99	KPRPTCHGNAMALLK	Trioxidation(C)@6; Oxidation(M)@11		-0.0038	1699.85	3	19	1.1.1.983.7	Winner
0	99	LDEDDSCSLLTK	Trioxidation(C)@7		0.0058	1385.59	2	18	1.1.1.1326.6	Winner
0	99	LDEDDSCSLLTK	Trioxidation(C)@7		0.0058	1385.59	2	16	1.1.1.1333.5	Winner
