# Supplementary material for: Cdc7 activates replication checkpoint by phosphorylating the Chk1-binding domain of Claspin in human cells
Source: eLife. 2019 Dec 31;8:e50796. doi: 10.7554/eLife.50796 (PMC6996922; doi:10.7554/eLife.50796)
Supplement: Figure 4—source data 3. [file elife-50796-fig4-data3.xlsx]

## Sheet: -
Contrib	Conf	Sequence	Modifications	Cleavages	∆Mass	Prec MW	z	Sc	Spectrum	Type
2	99	NQEDDVEQPFNDSG	Amidated@C-term	cleaved G-C@C-term	0.0036	1591.64	2	16	1.1.1.1310.17	Winner
0	99	SLYQENLEAQVKP	Amidated@C-term	cleaved P-C@C-term	-0.0053	1516.78	2	15	1.1.1.1408.13	Winner
0.07	99	SLYQENLEAQVKP	Amidated@C-term	cleaved P-C@C-term	-0.0062	1516.78	2	20	1.1.1.1403.13	Winner
0	91.5	NQEDDVEQPFNDSG	Amidated@C-term	cleaved G-C@C-term	0.0036	1591.64	2	11	1.1.1.1315.21	Winner
0	64	GSEQTTGAENEVETNALPVVSK	Carbamyl@N-term; Deamidated(N)@10		-0.0279	2303.05	3	10	1.1.1.1466.15	Winner
0	99	LDEDDSCSLLTK	Carboxy(D)@5; Dioxidation(C)@7		0.0201	1413.6	2	12	1.1.1.1455.9	Winner
0	99	ETQIITGSDESCR	Carboxy(E)@10; Dioxidation(C)@12		0.0165	1513.64	2	15	1.1.1.1196.8	Winner
0	99	ETQIITGSDESCR	Carboxy(E)@10; Dioxidation(C)@12		0.0165	1513.64	2	15	1.1.1.1201.13	Winner
0	92.2	GSEQTTGAENEVETNALPVVSK	Carboxy(E)@13		-0.0279	2303.05	3	13	1.1.1.1460.9	Winner
0	55.9	LSEPSLPIEDSQDLYNASPEPK	Carboxy(E)@9		-0.0207	2472.13	3	12	1.1.1.1719.6	Winner
0	99	GSEQTTGAENEVETNALPVVSK	Cation:K(E)@11		-0.0121	2297.03	3	14	1.1.1.1455.12	Winner
0	99	GSEQTTGAENEVETNALPVVSK	Cation:K(E)@11		-0.0059	2297.04	4	14	1.1.1.1460.5	Winner
0	57.5	LGADEDSFVILEPETNR	Cation:K(E)@5; Oxidation(F)@8		-0.0311	1957.84	3	12	1.1.1.1768.6	Winner
0	18	DLVKNEELEIQEK	Cation:K(E)@7	missed K-N@4	-0.0104	1623.77	3	9	1.1.1.1384.10	Winner
0	99	GSEQTTGAENEVETNALPVVSK	Cation:K(E)@9		-0.0121	2297.03	3	15	1.1.1.1466.14	Winner
0	99	LSEPSLPIEDSQDLYNASPEPK	Cation:K(E)@9		-0.0126	2466.11	4	16	1.1.1.1719.3	Winner
0	34.6	GSEQTTGAENEVETNALPVVSK	Cation:K(E)@9		-0.0059	2297.04	4	8	1.1.1.1466.6	Winner
0	99	LSEPSLPIEDSQDLYNASPEPK	Cation:Na(D)@10		-0.0002	2450.15	3	24	1.1.1.1717.6	Winner
0	64	SLSSDSTLLLFK	Cation:Na(D)@5		0.002	1331.7	2	12	1.1.1.1796.3	Winner
0	64	SLSSDSTLLLFK	Cation:Na(D)@5		0.002	1331.7	2	12	1.1.1.1788.3	Winner
0	39	SLSSDSTLLLFK	Cation:Na(D)@5		0.002	1331.7	2	11	1.1.1.1801.4	Winner
0	99	LGADEDSFVILEPETNR	Cation:Na(D)@6		0.0023	1925.9	3	25	1.1.1.1737.4	Winner
0	99	LGADEDSFVILEPETNR	Cation:Na(D)@6		0.0023	1925.9	3	18	1.1.1.1732.3	Winner
0	99	LGADEDSFVILEPETNR	Cation:Na(D)@6		0.0026	1925.9	3	23	1.1.1.1752.7	Winner
0	99	ITAEEEEEIGEDSQFMILAK	Cation:Na(E)@11; Oxidation(M)@16		-0.0006	2319.04	3	16	1.1.1.1749.9	Winner
0	99	ITAEEEEEIGEDSQFMILAK	Cation:Na(E)@11; Oxidation(M)@16		-0.0006	2319.04	3	14	1.1.1.1744.12	Winner
0	51.2	ITAEEEEEIGEDSQFMILAK	Cation:Na(E)@11; Oxidation(M)@16		-0.0007	2319.04	3	10	1.1.1.1754.9	Winner
0	99	LGADEDSFVILEPETNR	Cation:Na(E)@5		-0.0016	1925.9	3	15	1.1.1.1757.7	Winner
0	99	LGADEDSFVILEPETNR	Cation:Na(E)@5		0.0023	1925.9	3	23	1.1.1.1747.6	Winner
0	99	LGADEDSFVILEPETNR	Cation:Na(E)@5		0.0023	1925.9	3	25	1.1.1.1742.3	Winner
0	99	ITAEEEEEIGEDSQFMILAK	Cation:Na(E)@8		-0.0001	2303.05	3	16	1.1.1.1888.6	Winner
0	99	ITAEEEEEIGEDSQFMILAK	Cation:Na(E)@8; Oxidation(M)@16		-0.0006	2319.04	3	12	1.1.1.1739.12	Winner
0	99	GSEQTTGAENEVETNALPVVSK	Cation:Na(E)@9		-0.0067	2281.06	3	27	1.1.1.1457.14	Winner
0	99	GSEQTTGAENEVETNALPVVSK	Cation:Na(E)@9		-0.0067	2281.06	3	25	1.1.1.1462.13	Winner
0	99	GSEQTTGAENEVETNALPVVSK	Cation:Na(E)@9		-0.0067	2281.06	3	18	1.1.1.1468.12	Winner
0	99	GSEQTTGAENEVETNALPVVSK	Cation:Na(E)@9		-0.0063	2281.06	3	18	1.1.1.1452.7	Winner
0	99	LSEPSLPIEDSQDLYNASPEPK	Cation:Na(E)@9		-0.0002	2450.15	3	24	1.1.1.1712.10	Winner
0	99	LSEPSLPIEDSQDLYNASPEPK	Cation:Na(E)@9		-0.0006	2450.15	3	18	1.1.1.1707.12	Winner
0	99	LSEPSLPIEDSQDLYNASPEPK	Cation:Na(E)@9		-0.0002	2450.15	3	24	1.1.1.1722.6	Winner
0	99	ESALNLPYHMPENK	Chloro(Y)@8		0.0044	1675.75	2	10	1.1.1.1374.12	Winner
0	99	CLEDDTQSQLLDADGFLNVR	Cyano(C)@1	cleaved F-C@N-term	0.0006	2276.04	3	24	1.1.1.1939.2	Winner
0.03	99	CLEDDTQSQLLDADGFLNVR	Cyano(C)@1	cleaved F-C@N-term	0.0006	2276.04	3	26	1.1.1.1944.2	Winner
2	99	ENMEELLNLCSGK	Cys->Dha(C)@10		0.0014	1444.69	2	13	1.1.1.1756.7	Winner
0	99	ENMEELLNLCSGK	Cys->Dha(C)@10		0.0014	1444.69	2	14	1.1.1.1761.5	Winner
0	99	ENMEELLNLCSGK	Cys->Dha(C)@10		0.0014	1444.69	2	13	1.1.1.1766.4	Winner
0	42	ENMEELLNLCSGK	Cys->Dha(C)@10		0.0014	1444.69	2	8	1.1.1.1751.10	Winner
0	99	KENMEELLNLCSGK	Cys->Dha(C)@11	missed K-E@1	0.0031	1572.78	3	11	1.1.1.1588.8	Winner
0	73.6	QPSKLDEDDSCSLLTK	Cys->Dha(C)@11	missed K-L@4	0.0027	1743.86	3	9	1.1.1.1302.8	Winner
0	58.1	QPSKLDEDDSCSLLTK	Cys->Dha(C)@11	missed K-L@4	0.0027	1743.86	3	9	1.1.1.1297.8	Winner
0	99	ETQIITGSDESCR	Cys->Dha(C)@12		0.003	1403.66	2	17	1.1.1.1100.16	Winner
0	99	ETQIITGSDESCR	Cys->Dha(C)@12		0.003	1403.66	2	18	1.1.1.1106.16	Winner
2	99	ETQIITGSDESCR	Cys->Dha(C)@12		0.0028	1403.66	2	17	1.1.1.1117.17	Winner
0	99	ETQIITGSDESCR	Cys->Dha(C)@12		0.003	1403.66	2	16	1.1.1.1112.20	Winner
0	99	ETQIITGSDESCRK	Cys->Dha(C)@12	missed R-K@13	-0.002	1531.75	3	14	1.1.1.1012.6	Winner
0	99	ETQIITGSDESCRK	Cys->Dha(C)@12	missed R-K@13	-0.002	1531.75	3	14	1.1.1.1017.5	Winner
2	99	ETQIITGSDESCRK	Cys->Dha(C)@12	missed R-K@13	-0.002	1531.75	3	16	1.1.1.1006.4	Winner
0	98.7	ETQIITGSDESCRK	Cys->Dha(C)@12	missed R-K@13	-0.002	1531.75	3	12	1.1.1.1006.3	Winner
0	93.4	ETQIITGSDESCRK	Cys->Dha(C)@12	missed R-K@13	0.0005	1531.75	3	11	1.1.1.1022.3	Winner
0	93.4	PTCHGNAMALLK	Cys->Dha(C)@3; Oxidation(M)@8	cleaved R-P@N-term	0.0009	1236.63	3	10	1.1.1.1047.2	Winner
0	47.2	PTCHGNAMALLK	Cys->Dha(C)@3; Oxidation(M)@8	cleaved R-P@N-term	0.0009	1236.63	3	9	1.1.1.1042.2	Winner
0	99	LDEDDSCSLLTK	Cys->Dha(C)@7		0	1303.61	2	10	1.1.1.1346.12	Winner
0	97.7	LDEDDSCSLLTK	Cys->Dha(C)@7		0.0038	1303.62	2	9	1.1.1.1339.12	Winner
0	11.6	LDEDDSCSLLTK	Cys->Dha(C)@7		-0.0016	1303.61	2	6	1.1.1.1420.10	Winner
0	99	NASRPMVIQESK	Deamidated(N)@1		0.0012	1359.68	3	15	1.1.1.1117.7	Winner
0	99	NASRPMVIQESK	Deamidated(N)@1		0.0012	1359.68	3	15	1.1.1.1112.8	Winner
0	99	NASRPMVIQESK	Deamidated(N)@1		-0.0012	1359.68	3	12	1.1.1.1079.6	Winner
0	99	NASRPMVIQESK	Deamidated(N)@1		-0.0012	1359.68	3	11	1.1.1.1074.4	Winner
0	99	NQYQALKPR	Deamidated(N)@1		0.0005	1117.59	2	11	1.1.1.1091.13	Winner
0	99	NQYQALKPR	Deamidated(N)@1		0.0005	1117.59	2	13	1.1.1.1093.8	Winner
0	99	NQYQALKPR	Deamidated(N)@1		0.0005	1117.59	2	13	1.1.1.1099.8	Winner
0	99	NQYQALKPR	Deamidated(N)@1		0.0004	1117.59	2	12	1.1.1.1042.9	Winner
0	98.6	NQYQALKPR	Deamidated(N)@1		0.0004	1117.59	2	11	1.1.1.1037.9	Winner
0	95.7	NASRPMVIQESK	Deamidated(N)@1		0.0012	1359.68	3	9	1.1.1.1122.5	Winner
0	85.7	NQYQALKPR	Deamidated(N)@1		0.0001	1117.59	2	8	1.1.1.1086.11	Winner
0	35.9	NQYQALKPR	Deamidated(N)@1		0.0005	1117.59	2	6	1.1.1.1106.11	Winner
0	28.9	NQYQALKPR	Deamidated(N)@1		0.0004	1117.59	2	9	1.1.1.1047.8	Winner
0	26.6	NASRPMVIQESK	Deamidated(N)@1		-0.0012	1359.68	3	6	1.1.1.1084.6	Winner
0	21.9	NPFEAIRPGSAQQVK	Deamidated(N)@1		0.0166	1641.86	3	9	1.1.1.1319.6	Winner
0	20.1	NQYQALKPR	Deamidated(N)@1		0.0001	1117.59	2	8	1.1.1.1017.9	Winner
0	99	NASRPMVIQESK	Deamidated(N)@1; Deamidated(R)@4; Oxidation(P)@5; Oxidation(M)@6		0.0134	1392.67	2	11	1.1.1.1023.11	Winner
0	96.2	NASRPMVIQESK	Deamidated(N)@1; Deamidated(R)@4; Oxidation(P)@5; Oxidation(M)@6		0.0134	1392.67	2	11	1.1.1.1013.8	Winner
0	99	NASRPMVIQESK	Deamidated(N)@1; Oxidation(M)@6		0.0005	1375.68	3	16	1.1.1.1019.5	Winner
0	99	NASRPMVIQESK	Deamidated(N)@1; Oxidation(M)@6		0.0002	1375.68	3	14	1.1.1.1009.4	Winner
0	99	NASRPMVIQESK	Deamidated(N)@1; Oxidation(M)@6		0.0002	1375.68	3	14	1.1.1.987.7	Winner
0	99	NASRPMVIQESK	Deamidated(N)@1; Oxidation(M)@6		0.0002	1375.68	3	17	1.1.1.1014.4	Winner
0	99	NASRPMVIQESK	Deamidated(N)@1; Oxidation(M)@6		0.0002	1375.68	3	14	1.1.1.982.4	Winner
0	95.5	NASRPMVIQESK	Deamidated(N)@1; Oxidation(M)@6		0.0002	1375.68	3	12	1.1.1.992.7	Winner
0	95.3	NASRPMVIQESK	Deamidated(N)@1; Oxidation(M)@6		0.0005	1375.68	3	11	1.1.1.1024.7	Winner
0	99	NASRPMVIQESK	Deamidated(N)@1; Oxidation(P)@5; Oxidation(M)@6		0.0025	1391.67	3	11	1.1.1.1041.6	Winner
0	99	NFVFHTLSPVKAEAAK	Deamidated(N)@1; Phospho(S)@8	missed K-A@11	0.003	1838.9	3	20	1.1.1.1680.3	Winner
0	99	NFVFHTLSPVKAEAAK	Deamidated(N)@1; Phospho(S)@8	missed K-A@11	-0.0005	1838.9	3	17	1.1.1.1614.4	Winner
0	99	NFVFHTLSPVKAEAAK	Deamidated(N)@1; Phospho(S)@8	missed K-A@11	0.0067	1838.9	3	14	1.1.1.1629.4	Winner
0	99	NFVFHTLSPVKAEAAK	Deamidated(N)@1; Phospho(S)@8	missed K-A@11	-0.0014	1838.9	3	16	1.1.1.1667.5	Winner
0	99	NFVFHTLSPVKAEAAK	Deamidated(N)@1; Phospho(S)@8	missed K-A@11	-0.0014	1838.9	3	14	1.1.1.1672.5	Winner
0	99	NFVFHTLSPVKAEAAK	Deamidated(N)@1; Phospho(S)@8	missed K-A@11	0.003	1838.9	3	12	1.1.1.1686.7	Winner
0	67.8	NFVFHTLSPVK	Deamidated(N)@1; Phospho(S)@8		0.0031	1368.65	2	11	1.1.1.1832.3	Winner
0	63	NFVFHTLSPVK	Deamidated(N)@1; Phospho(S)@8		0.0023	1368.65	2	11	1.1.1.1787.3	Winner
0	42.9	NFVFHTLSPVKAEAAK	Deamidated(N)@1; Phospho(S)@8	missed K-A@11	0.003	1838.9	3	17	1.1.1.1624.4	Winner
0	99	GSEQTTGAENEVETNALPVVSK	Deamidated(N)@10		-0.0041	2260.07	2	21	1.1.1.1476.7	Winner
0	99	GSEQTTGAENEVETNALPVVSK	Deamidated(N)@10		-0.0054	2260.07	3	27	1.1.1.1408.12	Winner
0	99	GSEQTTGAENEVETNALPVVSK	Deamidated(N)@10		-0.0058	2260.06	3	23	1.1.1.1403.12	Winner
0	99	EIIDTANTTEMNSDHHSK	Deamidated(N)@12		0.0027	2042.89	4	15	1.1.1.1118.8	Winner
0	99	EIIDTANTTEMNSDHHSK	Deamidated(N)@12		-0.0017	2042.88	4	13	1.1.1.1137.12	Winner
0	99	EIIDTANTTEMNSDHHSK	Deamidated(N)@12		0.0032	2042.89	3	17	1.1.1.1121.8	Winner
0	99	EIIDTANTTEMNSDHHSK	Deamidated(N)@12		0.0032	2042.89	3	13	1.1.1.1127.15	Winner
0	70.1	EIIDTANTTEMNSDHHSK	Deamidated(N)@12		0.0027	2042.89	4	11	1.1.1.1125.8	Winner
0	70.1	EIIDTANTTEMNSDHHSK	Deamidated(N)@12		-0.0017	2042.88	4	11	1.1.1.1132.6	Winner
0	99	FTSQDASTPASSELNKQEK	Deamidated(N)@15	missed K-Q@16	0.0018	2067.96	3	19	1.1.1.1118.16	Winner
0	99	FTSQDASTPASSELNKQEK	Deamidated(N)@15	missed K-Q@16	0.0018	2067.96	3	17	1.1.1.1113.14	Winner
0	99	FTSQDASTPASSELNKQEK	Deamidated(N)@15	missed K-Q@16	-0.0015	2067.96	3	20	1.1.1.1183.17	Winner
0	99	FTSQDASTPASSELNKQEK	Deamidated(N)@15	missed K-Q@16	-0.0015	2067.96	3	20	1.1.1.1173.14	Winner
0	99	FTSQDASTPASSELNKQEK	Deamidated(N)@15	missed K-Q@16	-0.0015	2067.96	3	19	1.1.1.1178.17	Winner
0	99	GSEQTTGAENEVETNALPVVSK	Deamidated(N)@15		0.001	2260.07	2	18	1.1.1.1493.9	Winner
0	99	GSEQTTGAENEVETNALPVVSK	Deamidated(N)@15		-0.0034	2260.07	3	22	1.1.1.1504.8	Winner
0	99	GSEQTTGAENEVETNALPVVSK	Deamidated(N)@15		-0.0062	2260.06	3	20	1.1.1.1433.17	Winner
0	99	GSEQTTGAENEVETNALPVVSK	Deamidated(N)@15		-0.0052	2260.07	3	27	1.1.1.1423.18	Winner
0	99	GSEQTTGAENEVETNALPVVSK	Deamidated(N)@15		-0.0052	2260.07	3	19	1.1.1.1428.18	Winner
0	99	GSEQTTGAENEVETNALPVVSK	Deamidated(N)@15		-0.0038	2260.07	3	26	1.1.1.1498.10	Winner
0	99	GSEQTTGAENEVETNALPVVSK	Deamidated(N)@15		-0.0038	2260.07	3	18	1.1.1.1486.15	Winner
0	99	GSEQTTGAENEVETNALPVVSK	Deamidated(N)@15		-0.0038	2260.07	3	29	1.1.1.1492.7	Winner
0	99	GSEQTTGAENEVETNALPVVSK	Deamidated(N)@15		-0.0054	2260.07	3	17	1.1.1.1438.11	Winner
0	99	GSEQTTGAENEVETNALPVVSK	Deamidated(N)@15		-0.0052	2260.07	3	27	1.1.1.1413.15	Winner
0	99	GSEQTTGAENEVETNALPVVSK	Deamidated(N)@15		-0.0052	2260.07	3	28	1.1.1.1418.12	Winner
0	99	GSEQTTGAENEVETNALPVVSK	Deamidated(N)@15; Oxidation(P)@18		0.0427	2276.11	3	14	1.1.1.1457.13	Winner
0	99	GSEQTTGAENEVETNALPVVSK	Deamidated(N)@15; Oxidation(P)@18		0.0427	2276.11	3	14	1.1.1.1462.12	Winner
0	99	LGADEDSFVILEPETNRELEALK	Deamidated(N)@16	missed R-E@17	0.0011	2588.29	3	23	1.1.1.1858.4	Winner
0	99	LGADEDSFVILEPETNRELEALK	Deamidated(N)@16	missed R-E@17	0.0005	2588.29	3	26	1.1.1.1863.4	Winner
0	99	LGADEDSFVILEPETNRELEALK	Deamidated(N)@16	missed R-E@17	0.0011	2588.29	3	26	1.1.1.1868.3	Winner
0	99	LGADEDSFVILEPETNRELEALK	Deamidated(N)@16	missed R-E@17	0.0051	2588.29	3	27	1.1.1.1931.3	Winner
0	99	LGADEDSFVILEPETNRELEALK	Deamidated(N)@16	missed R-E@17	0.0051	2588.29	3	28	1.1.1.1943.3	Winner
0	99	LGADEDSFVILEPETNRELEALK	Deamidated(N)@16	missed R-E@17	0.0051	2588.29	3	30	1.1.1.1938.2	Winner
0	99	LSEPSLPIEDSQDLYNASPEPK	Deamidated(N)@16		0.0063	2429.16	3	27	1.1.1.1738.6	Winner
0	99	LSEPSLPIEDSQDLYNASPEPK	Deamidated(N)@16		0.0052	2429.15	3	18	1.1.1.1689.13	Winner
0	99	LSEPSLPIEDSQDLYNASPEPK	Deamidated(N)@16		0.004	2429.15	3	23	1.1.1.1694.11	Winner
0	99	DLVKNEELEIQEK	Deamidated(N)@5	missed K-N@4	-0.0004	1586.8	3	18	1.1.1.1436.4	Winner
0	99	DLVKNEELEIQEK	Deamidated(N)@5	missed K-N@4	-0.0004	1586.8	3	14	1.1.1.1446.5	Winner
0	99	DLVKNEELEIQEK	Deamidated(N)@5	missed K-N@4	-0.004	1586.8	3	13	1.1.1.1350.6	Winner
0	99	DLVKNEELEIQEK	Deamidated(N)@5	missed K-N@4	-0.0013	1586.8	3	12	1.1.1.1355.10	Winner
0	99	DLVKNEELEIQEK	Deamidated(N)@5	missed K-N@4	-0.0013	1586.8	3	17	1.1.1.1361.5	Winner
0	99	DLVKNEELEIQEK	Deamidated(N)@5	missed K-N@4	-0.0001	1586.8	3	12	1.1.1.1451.5	Winner
0	99	DLVKNEELEIQEK	Deamidated(N)@5	missed K-N@4	-0.0004	1586.8	3	17	1.1.1.1441.4	Winner
0	99	DLVKNEELEIQEK	Deamidated(N)@5	missed K-N@4	-0.0004	1586.8	3	15	1.1.1.1367.9	Winner
0	25.8	ESALNLPYHMPENK	Deamidated(N)@5		0.004	1642.77	3	9	1.1.1.1512.5	Winner
0	6.8	ESALNLPYHMPENK	Deamidated(N)@5; Deamidated(N)@13		0.0144	1643.76	3	7	1.1.1.1518.5	Winner
0	98.6	ESALNLPYHMPENK	Deamidated(N)@5; Oxidation(M)@10		0.0011	1658.76	3	13	1.1.1.1354.5	Winner
0	99	TGSLLNQPK	Deamidated(N)@6		0.0006	957.514	2	12	1.1.1.1118.7	Winner
0	98.8	TGSLLNQPK	Deamidated(N)@6		0.0007	957.514	2	12	1.1.1.1101.4	Winner
0	98.6	TGSLLNQPK	Deamidated(N)@6		0.0006	957.514	2	12	1.1.1.1107.3	Winner
0	96.7	TGSLLNQPK	Deamidated(N)@6		0.0006	957.514	2	12	1.1.1.1113.5	Winner
0	90.9	TGSLLNQPK	Deamidated(N)@6		0.0034	957.516	2	11	1.1.1.1095.5	Winner
0	80.9	TGSLLNQPK	Deamidated(N)@6		0.0006	957.514	2	8	1.1.1.1128.6	Winner
0	64.5	TGSLLNQPK	Deamidated(N)@6		0.0004	957.514	2	9	1.1.1.1133.5	Winner
0	93.5	EIIDTANTTEMNSDHHSK	Deamidated(N)@7; Oxidation(M)@11		0.0028	2058.88	4	12	1.1.1.1036.10	Winner
0	99	AGQTVNVNVIVK	Deamidated(N)@8		0.0024	1241.7	2	16	1.1.1.1301.11	Winner
0	99	AGQTVNVNVIVK	Deamidated(N)@8		0.0024	1241.7	2	16	1.1.1.1306.14	Winner
0	99	LAALSDHNPSAPR	Deamidated(N)@8		0.0013	1348.67	3	15	1.1.1.1126.7	Winner
0	98.9	AGQTVNVNVIVK	Deamidated(N)@8		-0.0006	1241.7	2	10	1.1.1.1420.7	Winner
0	99	DLVKNEELEIQEK	Deamidated(Q)@11	missed K-N@4	-0.0037	1586.8	2	11	1.1.1.1426.15	Winner
0	99	DLVKNEELEIQEK	Deamidated(Q)@11	missed K-N@4	-0.0004	1586.8	3	17	1.1.1.1431.6	Winner
0	99	LSEPSLPIEDSQDLYNASPEPK	Deamidated(Q)@12		0.0063	2429.16	3	20	1.1.1.1744.13	Winner
0	98.7	NPFEAIRPGSAQQVK	Deamidated(Q)@12		0.0005	1641.85	3	13	1.1.1.1365.8	Winner
0	95.5	NPFEAIRPGSAQQVK	Deamidated(Q)@13		0.0014	1641.85	2	10	1.1.1.1353.13	Winner
0	95	NPFEAIRPGSAQQVK	Deamidated(Q)@13		0.0005	1641.85	3	12	1.1.1.1359.7	Winner
0	46.5	NPFEAIRPGSAQQVK	Deamidated(Q)@13		-0.0022	1641.85	3	10	1.1.1.1371.9	Winner
0	97.5	NQYQALKPR	Deamidated(Q)@2		0.0001	1117.59	2	12	1.1.1.1027.8	Winner
0	80.7	ETQIITGSDESCRK	Deamidated(Q)@3; Cys->Dha(C)@12	missed R-K@13	0.0007	1532.73	3	9	1.1.1.1034.10	Winner
0	87.7	ETQIITGSDESCRK	Deamidated(Q)@3; Propionamide(C)@12	missed R-K@13	0.0022	1637.76	3	11	1.1.1.1045.9	Winner
0	50.9	ETQIITGSDESCRK	Deamidated(Q)@3; Propionamide(C)@12	missed R-K@13	0.0022	1637.76	3	10	1.1.1.1042.8	Winner
0	99	FTSQDASTPASSELNK	Deamidated(Q)@4		0.0004	1682.76	2	16	1.1.1.1207.16	Winner
0	99	FTSQDASTPASSELNKQEK	Deamidated(Q)@4	missed K-Q@16	-0.0015	2067.96	3	17	1.1.1.1167.10	Winner
0	99	GSEQTTGAENEVETNALPVVSK	Deamidated(Q)@4		-0.001	2260.07	3	26	1.1.1.1481.9	Winner
0	99	GSEQTTGAENEVETNALPVVSK	Deamidated(Q)@4		-0.001	2260.07	3	26	1.1.1.1476.6	Winner
0	95.9	NQYQALKPR	Deamidated(Q)@4		0.0001	1117.59	2	10	1.1.1.1032.8	Winner
0	89.5	NQYQALKPR	Deamidated(Q)@4		0.0001	1117.59	2	11	1.1.1.1022.5	Winner
0.1	65.4	EALKQLHSETQR	Deamidated(Q)@5	missed K-Q@4	0	1439.74	3	9	1.1.1.983.9	Winner
0	50.9	PMVIQESK	Deamidated(Q)@5	cleaved R-P@N-term	0.0086	931.477	2	5	1.1.1.1069.7	Winner
0	32.8	EALKQLHSETQR	Deamidated(Q)@5	missed K-Q@4	0	1439.74	3	8	1.1.1.993.8	Winner
0	32.2	EALKQLHSETQR	Deamidated(Q)@5	missed K-Q@4	0	1439.74	3	9	1.1.1.988.9	Winner
0	99	TGSLLNQPK	Deamidated(Q)@7		0.0004	957.514	2	11	1.1.1.1123.4	Winner
0.07	53.8	ELEALKQR	Deamidated(Q)@7	missed K-Q@6	-0.0013	986.538	2	7	1.1.1.1031.7	Winner
0	34.9	ELEALKQR	Deamidated(Q)@7	missed K-Q@6	-0.0013	986.538	2	7	1.1.1.1036.7	Winner
0	30.6	ELEALKQR	Deamidated(Q)@7	missed K-Q@6	-0.001	986.539	2	6	1.1.1.1041.10	Winner
0	79.4	NASRPMVIQESK	Deamidated(Q)@9		0.0016	1359.68	3	11	1.1.1.1038.5	Winner
0	24.3	NASRPMVIQESK	Deamidated(Q)@9		0.0018	1359.68	3	8	1.1.1.1043.4	Winner
0	20.9	NASRPMVIQESK	Deamidated(Q)@9		0.0016	1359.68	3	8	1.1.1.1033.4	Winner
0	92.2	DMGTDGKEELKADVV	Dehydrated(D)@13	cleaved V-P@C-term; missed K-E@7; missed K-A@11	-0.0001	1587.75	2	10	1.1.1.1543.11	Winner
0	61.5	TGSLLNQPK	Dehydrated(S)@3		-0.0019	938.517	2	6	1.1.1.1052.6	Winner
0	78.5	EIIDTANTTEMNSDHHSK	Dehydrated(T)@5; Oxidation(M)@11		0.0018	2039.89	3	8	1.1.1.1154.19	Winner
0	99	SSAVGPPEK	Delta:H(2)C(2)@N-term		0.0007	896.461	2	10	1.1.1.940.2	Winner
0	64	DLVKNEELEIQEK	Delta:H(4)C(2)(K)@13	missed K-N@4	0.0008	1613.85	3	10	1.1.1.1522.5	Winner
0	11.6	DLVKNEELEIQEK	Delta:H(4)C(2)(K)@13	missed K-N@4	0.0002	1613.85	3	9	1.1.1.1515.8	Winner
0.97	99	SSAVGPPEK	Delta:H(4)C(2)(K)@9		0.0019	898.478	2	11	1.1.1.1041.4	Winner
0	80.7	SSAVGPPEK	Delta:H(4)C(2)(K)@9		0.0019	898.478	2	8	1.1.1.1046.5	Winner
0	50.9	SSAVGPPEK	Delta:H(4)C(2)(K)@9		0.0019	898.478	2	7	1.1.1.1036.3	Winner
0	99	GSEQTTGAENEVETNALPVVSK	Delta:H(4)C(2)@N-term		-0.0047	2287.11	3	13	1.1.1.1522.9	Winner
0	99	GSEQTTGAENEVETNALPVVSK	Delta:H(4)C(2)@N-term		-0.0043	2287.11	3	16	1.1.1.1590.8	Winner
0.01	97.9	VEEPEQQNK	Delta:H(4)C(2)@N-term		-0.002	1127.54	2	11	1.1.1.921.4	Winner
0	95.6	VEEPEQQNK	Delta:H(4)C(2)@N-term		-0.002	1127.54	2	10	1.1.1.916.8	Winner
0	92.2	LGADEDSFVILEPETNR	Delta:H(4)C(2)@N-term		-0.0011	1931.95	3	9	1.1.1.1888.2	Winner
0	39.8	VEEPEQQNK	Delta:H(4)C(2)@N-term		-0.002	1127.54	2	8	1.1.1.910.7	Winner
0	99	GSEQTTGAENEVETNALPVVSK	Dimethyl(N)@10		-0.0047	2287.11	3	15	1.1.1.1576.9	Winner
0	99	GSEQTTGAENEVETNALPVVSK	Dimethyl(N)@10		-0.0043	2287.11	3	19	1.1.1.1595.8	Winner
0	99	GSEQTTGAENEVETNALPVVSK	Dimethyl(N)@15		-0.0051	2287.11	3	14	1.1.1.1600.9	Winner
0	99	LGADEDSFVILEPETNR	Dimethyl(R)@17		0	1931.95	2	16	1.1.1.1883.5	Winner
0	99	LGADEDSFVILEPETNR	Dimethyl(R)@17		0	1931.95	2	18	1.1.1.1891.3	Winner
0	99	LGADEDSFVILEPETNR	Dimethyl(R)@17		0	1931.95	2	15	1.1.1.1892.7	Winner
2	99	MGYFPTEEK	Dioxidation(M)@1		-0.0012	1132.47	2	13	1.1.1.1259.9	Winner
0	99	MGYFPTEEK	Dioxidation(M)@1		-0.0012	1132.47	2	12	1.1.1.1274.6	Winner
0	99	MGYFPTEEK	Dioxidation(M)@1		0.0013	1132.48	2	9	1.1.1.1281.10	Winner
0	99	MGYFPTEEK	Dioxidation(M)@1		-0.0012	1132.47	2	13	1.1.1.1265.8	Winner
0	50.9	MGYFPTEEK	Dioxidation(M)@1		-0.0009	1132.47	2	9	1.1.1.1253.8	Winner
0	99	ESALNLPYHMPENK	Dioxidation(M)@10		-0.0023	1673.77	3	12	1.1.1.1351.14	Winner
0	99	TVADSDESYMEK	Dioxidation(M)@10		-0.0015	1405.55	2	14	1.1.1.978.5	Winner
0	99	TVADSDESYMEK	Dioxidation(M)@10		-0.0018	1405.55	2	18	1.1.1.989.3	Winner
0	99	TVADSDESYMEK	Dioxidation(M)@10		-0.0018	1405.55	2	15	1.1.1.984.6	Winner
0	99	TVADSDESYMEK	Dioxidation(M)@10		-0.0018	1405.55	2	13	1.1.1.994.11	Winner
0	93.4	ESALNLPYHMPENK	Dioxidation(M)@10		-0.0023	1673.77	3	11	1.1.1.1356.9	Winner
0	93.4	ESALNLPYHMPENK	Dioxidation(M)@10		-0.0023	1673.77	3	10	1.1.1.1362.6	Winner
0	36	ESALNLPYHMPENK	Dioxidation(M)@10		-0.0024	1673.77	3	7	1.1.1.1369.6	Winner
0	28.9	ESALNLPYHMPENK	Dioxidation(M)@10		-0.0005	1673.77	3	9	1.1.1.1346.10	Winner
0	99	EIIDTANTTEMNSDHHSK	Dioxidation(M)@11		0.0018	2073.89	3	16	1.1.1.1017.10	Winner
0	99	EIIDTANTTEMNSDHHSK	Dioxidation(M)@11		0	2073.89	4	15	1.1.1.1019.9	Winner
0	99	EIIDTANTTEMNSDHHSK	Dioxidation(M)@11		0	2073.89	4	18	1.1.1.1024.10	Winner
0	99	LPLASMDENAMDANMDELLDLCTGK	Dioxidation(M)@11; Oxidation(M)@15; Trioxidation(C)@22; Formyl(K)@25		0.0171	2833.18	3	21	1.1.1.1893.8	Winner
0	99	LPLASMDENAMDANMDELLDLCTGK	Dioxidation(M)@11; Oxidation(M)@15; Trioxidation(C)@22; Formyl(K)@25		0.0171	2833.18	3	20	1.1.1.1883.4	Winner
0	99	LPLASMDENAMDANMDELLDLCTGK	Dioxidation(M)@11; Oxidation(M)@15; Trioxidation(C)@22; Formyl(K)@25		0.0171	2833.18	3	22	1.1.1.1898.7	Winner
0	99	DMGTDGKEELKADVVPVTLAPK	Dioxidation(M)@2	missed K-E@7; missed K-A@11	-0.0016	2344.18	4	21	1.1.1.1495.7	Winner
0	99	DMGTDGKEELKADVVPVTLAPK	Dioxidation(M)@2	missed K-E@7; missed K-A@11	-0.0044	2344.18	3	32	1.1.1.1497.3	Winner
0	99	DMGTDGKEELKADVVPVTLAPK	Dioxidation(M)@2	missed K-E@7; missed K-A@11	-0.0038	2344.18	4	16	1.1.1.1519.9	Winner
0	99	DMGTDGKEELKADVVPVTLAPK	Dioxidation(M)@2	missed K-E@7; missed K-A@11	-0.0044	2344.18	3	26	1.1.1.1499.9	Winner
0	99	DMGTDGKEELKADVVPVTLAPK	Dioxidation(M)@2	missed K-E@7; missed K-A@11	-0.0016	2344.18	4	22	1.1.1.1501.10	Winner
0	99	DMGTDGKEELKADVVPVTLAPK	Dioxidation(M)@2	missed K-E@7; missed K-A@11	-0.0044	2344.18	3	23	1.1.1.1506.8	Winner
0	99	DMGTDGKEELKADVVPVTLAPK	Dioxidation(M)@2	missed K-E@7; missed K-A@11	-0.0044	2344.18	3	27	1.1.1.1498.12	Winner
0	99	DMGTDGKEELKADVVPVTLAPK	Dioxidation(M)@2	missed K-E@7; missed K-A@11	-0.0044	2344.18	3	24	1.1.1.1502.16	Winner
0	99	DMGTDGKEELKADVVPVTLAPK	Dioxidation(M)@2	missed K-E@7; missed K-A@11	-0.0016	2344.18	4	16	1.1.1.1507.5	Winner
0	99	PMVIQESK	Dioxidation(M)@2	cleaved R-P@N-term	-0.0016	962.473	2	11	1.1.1.942.4	Winner
0	99	PMVIQESK	Dioxidation(M)@2	cleaved R-P@N-term	-0.0016	962.473	2	9	1.1.1.936.7	Winner
0	99	RGPSFMTSPSPK	Dioxidation(M)@6	missed R-G@1	0.0009	1322.63	3	10	1.1.1.1029.7	Winner
2	99	RGPSFMTSPSPK	Dioxidation(M)@6	missed R-G@1	0.0009	1322.63	3	13	1.1.1.1034.6	Winner
0	92.5	NASRPMVIQESK	Dioxidation(M)@6		-0.0023	1390.69	3	11	1.1.1.957.4	Winner
0	99	LPLASMDENAMDANMDELLDLCTGK	Dioxidation(M)@6; Oxidation(M)@15; Trioxidation(C)@22; Formyl(K)@25		0.0171	2833.18	3	24	1.1.1.1888.8	Winner
0	99	NASRPMVIQESK	Dioxidation(R)@4; Oxidation(P)@5; Met->Hcy(M)@6		0.0022	1392.67	2	15	1.1.1.1018.7	Winner
0	81.8	ENMEELLNLCSGKFTSQDASTPASSELNK	Dipyrrolylmethanemethyl(C)@10	missed K-F@13	0.0546	3560.64	4	13	1.1.1.1182.14	Winner
0.12	99	PMVIQESK	Formyl@N-term	cleaved R-P@N-term	0.0014	958.481	2	11	1.1.1.944.7	Winner
0	92.5	PMVIQESK	Formyl@N-term	cleaved R-P@N-term	0.0014	958.481	2	9	1.1.1.949.7	Winner
0	64.8	PMVIQESK	Formyl@N-term	cleaved R-P@N-term	0.0014	958.481	2	9	1.1.1.959.4	Winner
0	99	PTCHGNAMALLK	Formyl@N-term; Dioxidation(C)@3; Oxidation(M)@8	cleaved R-P@N-term	-0.002	1330.6	2	14	1.1.1.1174.14	Winner
0	99	QLGVDVSIKPR	Gln->pyro-Glu@N-term		-0.0021	1193.67	2	14	1.1.1.1524.10	Winner
0	99	QLGVDVSIKPR	Gln->pyro-Glu@N-term		-0.0002	1193.68	2	16	1.1.1.1507.7	Winner
0	99	QLGVDVSIKPR	Gln->pyro-Glu@N-term		-0.0002	1193.68	2	16	1.1.1.1513.5	Winner
0	99	QLGVDVSIKPR	Gln->pyro-Glu@N-term		-0.0002	1193.68	2	16	1.1.1.1519.10	Winner
0	99	QLGVDVSIKPR	Gln->pyro-Glu@N-term		-0.0002	1193.68	2	15	1.1.1.1507.6	Winner
2	99	QLGVDVSIKPR	Gln->pyro-Glu@N-term		-0.0024	1193.67	2	12	1.1.1.1529.8	Winner
2	99	QLHSETQR	Gln->pyro-Glu@N-term		-0.0008	980.467	2	11	1.1.1.880.4	Winner
0	99	QLHSETQR	Gln->pyro-Glu@N-term		-0.001	980.466	2	11	1.1.1.900.4	Winner
0	99	QLHSETQR	Gln->pyro-Glu@N-term		-0.0008	980.467	2	11	1.1.1.905.3	Winner
0	99	QLHSETQR	Gln->pyro-Glu@N-term		-0.0008	980.467	2	12	1.1.1.895.6	Winner
0	98.9	QLHSETQR	Gln->pyro-Glu@N-term		-0.0008	980.467	2	10	1.1.1.910.3	Winner
0	98.6	QLGVDVSIKPR	Gln->pyro-Glu@N-term		-0.0024	1193.67	2	10	1.1.1.1528.6	Winner
0	98.2	QLHSETQR	Gln->pyro-Glu@N-term		-0.0008	980.467	2	12	1.1.1.890.6	Winner
0	98.1	QLHSETQR	Gln->pyro-Glu@N-term		-0.0008	980.467	2	12	1.1.1.885.5	Winner
0	91.5	QLHSETQR	Gln->pyro-Glu@N-term		-0.0006	980.467	2	7	1.1.1.916.4	Winner
0	63.7	QLGVDVSIKPR	Gln->pyro-Glu@N-term		-0.0024	1193.67	2	9	1.1.1.1535.6	Winner
0	58.1	QYQALKPR	Gln->pyro-Glu@N-term	cleaved N-Q@N-term	-0.0005	985.534	2	9	1.1.1.984.4	Winner
0	95	ETQIITGSDESCRK	Glu->pyro-Glu@N-term; Cys->Dha(C)@12	missed R-K@13	-0.0011	1513.74	3	9	1.1.1.1005.9	Winner
2	99	ESALNLPYHMPENK	Glu->pyro-Glu@N-term; Oxidation(M)@10		-0.0015	1639.77	2	13	1.1.1.1453.14	Winner
0	99	ESALNLPYHMPENK	Glu->pyro-Glu@N-term; Oxidation(M)@10		-0.0015	1639.77	2	12	1.1.1.1458.14	Winner
2	99	EIIDTANTTEMNSDHHSK	Glu->pyro-Glu@N-term; Oxidation(M)@11		0.0018	2039.89	3	18	1.1.1.1160.10	Winner
0	99	MGYFPTEEK	Oxidation(M)@1		-0.0006	1116.48	2	13	1.1.1.1238.6	Winner
0	99	MGYFPTEEK	Oxidation(M)@1		-0.0006	1116.48	2	13	1.1.1.1226.3	Winner
0	99	MGYFPTEEK	Oxidation(M)@1		-0.0006	1116.48	2	14	1.1.1.1244.7	Winner
0	99	MGYFPTEEK	Oxidation(M)@1		-0.0006	1116.48	2	14	1.1.1.1232.4	Winner
0	99	MGYFPTEEK	Oxidation(M)@1		-0.0002	1116.48	2	13	1.1.1.1268.4	Winner
0	99	MGYFPTEEK	Oxidation(M)@1		-0.0003	1116.48	2	13	1.1.1.1256.6	Winner
0	99	MGYFPTEEK	Oxidation(M)@1		-0.0003	1116.48	2	14	1.1.1.1250.9	Winner
0	99	MGYFPTEEKSETDENSGK	Oxidation(M)@1	missed K-S@9	-0.0019	2063.86	3	23	1.1.1.1184.15	Winner
0	99	MGYFPTEEKSETDENSGK	Oxidation(M)@1	missed K-S@9	-0.0019	2063.86	3	20	1.1.1.1179.16	Winner
0	99	MGYFPTEEKSETDENSGK	Oxidation(M)@1	missed K-S@9	-0.0018	2063.86	3	17	1.1.1.1169.15	Winner
0	99	MGYFPTEEKSETDENSGK	Oxidation(M)@1	missed K-S@9	-0.0018	2063.86	3	16	1.1.1.1190.7	Winner
0	99	MGYFPTEEKSETDENSGK	Oxidation(M)@1	missed K-S@9	-0.0019	2063.86	3	21	1.1.1.1174.15	Winner
0	98.5	MGYFPTEEK	Oxidation(M)@1		-0.0002	1116.48	2	12	1.1.1.1220.4	Winner
0	98.3	MGYFPTEEK	Oxidation(M)@1		0	1116.48	2	9	1.1.1.1331.15	Winner
0	98.2	MGYFPTEEK	Oxidation(M)@1		-0.0002	1116.48	2	11	1.1.1.1262.10	Winner
0	98.2	MGYFPTEEK	Oxidation(M)@1		-0.0002	1116.48	2	10	1.1.1.1295.10	Winner
0	97.7	MGYFPTEEK	Oxidation(M)@1		0	1116.48	2	8	1.1.1.1336.16	Winner
1.25	94.4	MGYFPTEEKSETDENSGKQPSK	Oxidation(M)@1	missed K-S@9; missed K-Q@18	-0.0002	2504.1	4	10	1.1.1.1118.15	Winner
0	92.2	MGYFPTEEK	Oxidation(M)@1		0.0026	1116.48	2	8	1.1.1.1305.10	Winner
0	82.4	MGYFPTEEK	Oxidation(M)@1		0	1116.48	2	9	1.1.1.1275.8	Winner
0	72.3	MGYFPTEEK	Oxidation(M)@1		0.001	1116.48	2	9	1.1.1.1281.9	Winner
0	29	MGYFPTEEK	Oxidation(M)@1		0.0006	1116.48	2	6	1.1.1.1320.13	Winner
0	20.6	MGYFPTEEK	Oxidation(M)@1		0.0009	1116.48	2	5	1.1.1.1310.10	Winner
0	17.6	MGYFPTEEK	Oxidation(M)@1		0.0003	1116.48	2	6	1.1.1.1300.10	Winner
0	99	MGYFPTEEKSETDENSGK	Oxidation(M)@1; Deamidated(N)@15	missed K-S@9	0.0006	2064.85	3	13	1.1.1.1201.12	Winner
0	99	ESALNLPYHMPENK	Oxidation(M)@10		-0.0008	1657.78	3	15	1.1.1.1317.8	Winner
0	99	ESALNLPYHMPENK	Oxidation(M)@10		-0.0008	1657.78	3	17	1.1.1.1322.12	Winner
0	99	ESALNLPYHMPENK	Oxidation(M)@10		-0.0012	1657.78	3	13	1.1.1.1342.6	Winner
0	99	ESALNLPYHMPENK	Oxidation(M)@10		-0.0012	1657.78	3	15	1.1.1.1337.9	Winner
0	99	ESALNLPYHMPENK	Oxidation(M)@10		-0.0008	1657.78	3	16	1.1.1.1327.12	Winner
0	99	ESALNLPYHMPENK	Oxidation(M)@10		-0.0008	1657.78	3	16	1.1.1.1332.11	Winner
0	99	TVADSDESYMEK	Oxidation(M)@10		-0.0009	1389.56	2	20	1.1.1.981.13	Winner
0	99	TVADSDESYMEK	Oxidation(M)@10		-0.0009	1389.56	2	21	1.1.1.975.14	Winner
0	99	TVADSDESYMEK	Oxidation(M)@10		-0.0009	1389.56	2	21	1.1.1.970.10	Winner
0	99	TVADSDESYMEK	Oxidation(M)@10		-0.0009	1389.56	2	21	1.1.1.965.11	Winner
0	99	TVADSDESYMEK	Oxidation(M)@10		-0.0013	1389.56	2	14	1.1.1.955.8	Winner
0	99	TVADSDESYMEK	Oxidation(M)@10		-0.0013	1389.56	2	14	1.1.1.987.15	Winner
0	99	TVADSDESYMEK	Oxidation(M)@10		-0.0013	1389.56	2	10	1.1.1.997.10	Winner
0	99	TVADSDESYMEK	Oxidation(M)@10		-0.0013	1389.56	2	21	1.1.1.960.10	Winner
0	99	TVADSDESYMEK	Oxidation(M)@10		-0.0017	1389.56	2	14	1.1.1.992.13	Winner
0	96.4	TVADSDESYMEK	Oxidation(M)@10		-0.0035	1389.56	2	8	1.1.1.1009.13	Winner
0	83.5	TVADSDESYMEK	Oxidation(M)@10		0.0022	1389.56	2	7	1.1.1.1054.8	Winner
0	58.3	ESALNLPYHMPENK	Oxidation(M)@10		0.0019	1657.78	3	10	1.1.1.1368.8	Winner
0	57.3	ESALNLPYHMPENK	Oxidation(M)@10		-0.0016	1657.78	3	10	1.1.1.1347.6	Winner
0	37.8	ESALNLPYHMPENK	Oxidation(M)@10		-0.007	1657.77	3	6	1.1.1.1427.11	Winner
0	31.6	ESALNLPYHMPENK	Oxidation(M)@10		-0.0047	1657.77	3	7	1.1.1.1414.5	Winner
0	27.9	ESALNLPYHMPENK	Oxidation(M)@10		-0.0014	1657.78	3	7	1.1.1.1420.3	Winner
0	77.2	ESALNLPYHMPENK	Oxidation(M)@10; Deamidated(N)@13		0.0011	1658.76	3	11	1.1.1.1361.7	Winner
0	99	TVADSDESYMEK	Oxidation(M)@10; Delta:H(4)C(2)(K)@12		-0.0033	1417.59	2	11	1.1.1.1134.12	Winner
0	99	TVADSDESYMEK	Oxidation(M)@10; Delta:H(4)C(2)(K)@12		-0.0033	1417.59	2	9	1.1.1.1142.15	Winner
0	99	EIIDTANTTEMNSDHHSK	Oxidation(M)@11		-0.0007	2057.9	4	20	1.1.1.998.10	Winner
0	99	EIIDTANTTEMNSDHHSK	Oxidation(M)@11		-0.0007	2057.9	4	20	1.1.1.1008.3	Winner
0	99	EIIDTANTTEMNSDHHSK	Oxidation(M)@11		0.0008	2057.9	2	18	1.1.1.1002.4	Winner
0	99	EIIDTANTTEMNSDHHSK	Oxidation(M)@11		0.0008	2057.9	2	13	1.1.1.1000.10	Winner
0	98.8	EIIDTANTTEMNSDHHSK	Oxidation(M)@11		-0.0007	2057.9	4	13	1.1.1.993.9	Winner
0	95.8	EIIDTANTTEMNSDHHSK	Oxidation(M)@11		0.0005	2057.9	4	12	1.1.1.1041.11	Winner
0.2	83.6	EIIDTANTTEMN	Oxidation(M)@11	cleaved N-S@C-term	-0.0002	1366.59	2	9	1.1.1.1186.11	Winner
0	99	EIIDTANTTEMNSDHHSK	Oxidation(M)@11; Deamidated(N)@12		0.0015	2058.88	3	13	1.1.1.1037.10	Winner
0	99	EIIDTANTTEMNSDHHSK	Oxidation(M)@11; Deamidated(N)@12		0.0024	2058.88	3	19	1.1.1.1016.16	Winner
0	99	EIIDTANTTEMNSDHHSK	Oxidation(M)@11; Deamidated(N)@12		0.0024	2058.88	3	18	1.1.1.1021.15	Winner
0	99	EIIDTANTTEMNSDHHSK	Oxidation(M)@11; Deamidated(N)@12		0.0028	2058.88	4	15	1.1.1.1026.11	Winner
0	99	EIIDTANTTEMNSDHHSK	Oxidation(M)@11; Deamidated(N)@12		0.0032	2058.88	4	16	1.1.1.1021.9	Winner
0	99	EIIDTANTTEMNSDHHSK	Oxidation(M)@11; Deamidated(N)@12		0.0032	2058.88	4	20	1.1.1.1014.7	Winner
0	69	EIIDTANTTEMNSDHHSK	Oxidation(M)@11; Deamidated(N)@12		0.0028	2058.88	4	11	1.1.1.1031.9	Winner
0	20.4	EIIDTANTTEMNSDHHSK	Oxidation(M)@11; Deamidated(N)@12		0.0047	2058.89	4	9	1.1.1.1047.6	Winner
0	99	ITAEEEEEIGEDSQFMILAK	Oxidation(M)@16		0.0031	2297.07	3	30	1.1.1.1744.11	Winner
0	99	ITAEEEEEIGEDSQFMILAK	Oxidation(M)@16		0.0031	2297.07	3	26	1.1.1.1734.7	Winner
0	99	ITAEEEEEIGEDSQFMILAK	Oxidation(M)@16		0.0031	2297.07	3	26	1.1.1.1764.4	Winner
0	99	ITAEEEEEIGEDSQFMILAK	Oxidation(M)@16		0.0031	2297.07	3	23	1.1.1.1786.5	Winner
0	99	ITAEEEEEIGEDSQFMILAK	Oxidation(M)@16		-0.0002	2297.06	3	29	1.1.1.1769.3	Winner
0	99	ITAEEEEEIGEDSQFMILAK	Oxidation(M)@16		-0.0011	2297.06	3	29	1.1.1.3048.2	Winner
0	99	ITAEEEEEIGEDSQFMILAK	Oxidation(M)@16		-0.0038	2297.06	3	26	1.1.1.1833.3	Winner
0	99	ITAEEEEEIGEDSQFMILAK	Oxidation(M)@16		0	2297.06	3	19	1.1.1.1767.5	Winner
0	99	ITAEEEEEIGEDSQFMILAK	Oxidation(M)@16		0	2297.06	3	20	1.1.1.1895.6	Winner
0	99	ITAEEEEEIGEDSQFMILAK	Oxidation(M)@16		-0.0002	2297.06	3	26	1.1.1.1890.6	Winner
0	99	ITAEEEEEIGEDSQFMILAK	Oxidation(M)@16		0.0031	2297.07	3	24	1.1.1.1791.5	Winner
0	99	ITAEEEEEIGEDSQFMILAK	Oxidation(M)@16		0.0031	2297.07	3	26	1.1.1.1754.8	Winner
0	99	ITAEEEEEIGEDSQFMILAK	Oxidation(M)@16		0.0031	2297.07	3	27	1.1.1.1739.11	Winner
0	99	ITAEEEEEIGEDSQFMILAK	Oxidation(M)@16		0.0041	2297.07	3	27	1.1.1.1775.4	Winner
0	99	ITAEEEEEIGEDSQFMILAK	Oxidation(M)@16		0.0037	2297.07	3	28	1.1.1.1797.3	Winner
0	99	ITAEEEEEIGEDSQFMILAK	Oxidation(M)@16		0.0042	2297.07	3	25	1.1.1.1811.2	Winner
0	99	ITAEEEEEIGEDSQFMILAK	Oxidation(M)@16		0.0046	2297.07	3	29	1.1.1.2527.2	Winner
0	99	ITAEEEEEIGEDSQFMILAK	Oxidation(M)@16		0.0046	2297.07	3	31	1.1.1.2502.2	Winner
0	99	ITAEEEEEIGEDSQFMILAK	Oxidation(M)@16		0.0035	2297.07	3	28	1.1.1.1759.5	Winner
0	99	ITAEEEEEIGEDSQFMILAK	Oxidation(M)@16		0.005	2297.07	3	25	1.1.1.1781.6	Winner
0	99	ITAEEEEEIGEDSQFMILAK	Oxidation(M)@16		0.0031	2297.07	3	28	1.1.1.1749.8	Winner
0	99	ITAEEEEEIGEDSQFMILAK	Oxidation(M)@16		0.0052	2297.07	3	21	1.1.1.1875.6	Winner
0	99	DMGTDGKEELKADVVPVTLAPK	Oxidation(M)@2	missed K-E@7; missed K-A@11	-0.0058	2328.18	3	17	1.1.1.1519.14	Winner
0	99	DMGTDGKEELKADVVPVTLAPK	Oxidation(M)@2	missed K-E@7; missed K-A@11	-0.0069	2328.18	3	13	1.1.1.1530.8	Winner
0	99	DMGTDGKEELKADVVPVTLAPK	Oxidation(M)@2	missed K-E@7; missed K-A@11	-0.0025	2328.19	4	13	1.1.1.1483.5	Winner
0	99	DMGTDGKEELKADVVPVTLAPK	Oxidation(M)@2	missed K-E@7; missed K-A@11	-0.0052	2328.18	3	12	1.1.1.1522.11	Winner
0	99	DMGTDGKEELKADVVPVTLAPK	Oxidation(M)@2	missed K-E@7; missed K-A@11	-0.0028	2328.19	4	21	1.1.1.1510.4	Winner
0	99	DMGTDGKEELKADVVPVTLAPK	Oxidation(M)@2	missed K-E@7; missed K-A@11	-0.0025	2328.19	4	25	1.1.1.1492.5	Winner
0	99	DMGTDGKEELKADVVPVTLAPK	Oxidation(M)@2	missed K-E@7; missed K-A@11	-0.003	2328.19	3	36	1.1.1.1493.8	Winner
0	99	DMGTDGKEELKADVVPVTLAPK	Oxidation(M)@2	missed K-E@7; missed K-A@11	-0.0028	2328.19	4	12	1.1.1.1549.8	Winner
0	99	DMGTDGKEELKADVVPVTLAPK	Oxidation(M)@2	missed K-E@7; missed K-A@11	-0.003	2328.19	3	21	1.1.1.1481.11	Winner
0	99	DMGTDGKEELKADVVPVTLAPK	Oxidation(M)@2	missed K-E@7; missed K-A@11	-0.003	2328.19	3	35	1.1.1.1494.11	Winner
0	99	DMGTDGKEELKADVVPVTLAPK	Oxidation(M)@2	missed K-E@7; missed K-A@11	-0.0037	2328.18	4	18	1.1.1.1516.2	Winner
0	99	DMGTDGKEELKADVVPVTLAPK	Oxidation(M)@2	missed K-E@7; missed K-A@11	-0.003	2328.19	3	32	1.1.1.1495.8	Winner
0	99	DMGTDGKEELKADVVPVTLAPK	Oxidation(M)@2	missed K-E@7; missed K-A@11	-0.003	2328.19	3	30	1.1.1.1496.9	Winner
0	99	DMGTDGKEELKADVVPVTLAPK	Oxidation(M)@2	missed K-E@7; missed K-A@11	0.0019	2328.19	4	13	1.1.1.1544.8	Winner
0	99	DMGTDGKEELKADVVPVTLAPK	Oxidation(M)@2	missed K-E@7; missed K-A@11	-0.002	2328.19	4	13	1.1.1.1522.6	Winner
0	99	DMGTDGKEELKADVVPVTLAPK	Oxidation(M)@2	missed K-E@7; missed K-A@11	-0.0025	2328.19	4	23	1.1.1.1504.4	Winner
0	99	DMGTDGKEELKADVVPVTLAPK	Oxidation(M)@2	missed K-E@7; missed K-A@11	-0.0025	2328.19	4	22	1.1.1.1498.4	Winner
0	99	DMGTDGKEELKADVVPVTLAPK	Oxidation(M)@2	missed K-E@7; missed K-A@11	-0.0025	2328.19	4	23	1.1.1.1486.10	Winner
0	99	EMDKENNDGSSEIGK	Oxidation(M)@2	missed K-E@4	-0.0028	1667.69	3	15	1.1.1.806.2	Winner
0	99	EMDKENNDGSSEIGK	Oxidation(M)@2	missed K-E@4	-0.0061	1667.69	3	14	1.1.1.823.2	Winner
0	99	PMVIQESK	Oxidation(M)@2	cleaved R-P@N-term	-0.0005	946.479	2	13	1.1.1.904.2	Winner
0	99	PMVIQESK	Oxidation(M)@2	cleaved R-P@N-term	-0.0005	946.479	2	11	1.1.1.899.2	Winner
0	99	PMVIQESK	Oxidation(M)@2	cleaved R-P@N-term	-0.0005	946.479	2	13	1.1.1.915.6	Winner
0	99	PMVIQESK	Oxidation(M)@2	cleaved R-P@N-term	-0.0005	946.479	2	13	1.1.1.909.5	Winner
0	99	PMVIQESK	Oxidation(M)@2	cleaved R-P@N-term	0.0028	946.482	2	10	1.1.1.961.5	Winner
0	99	PMVIQESK	Oxidation(M)@2	cleaved R-P@N-term	-0.0008	946.479	2	11	1.1.1.953.3	Winner
0	99	PMVIQESK	Oxidation(M)@2	cleaved R-P@N-term	-0.0008	946.479	2	11	1.1.1.920.7	Winner
0	98.9	PMVIQESK	Oxidation(M)@2	cleaved R-P@N-term	-0.0008	946.479	2	9	1.1.1.969.5	Winner
0	97.8	PMVIQESK	Oxidation(M)@2	cleaved R-P@N-term	-0.0039	946.476	2	10	1.1.1.948.3	Winner
0	96.6	PMVIQESK	Oxidation(M)@2	cleaved R-P@N-term	-0.0069	946.472	2	10	1.1.1.927.3	Winner
0	95.3	PMVIQESK	Oxidation(M)@2	cleaved R-P@N-term	-0.0039	946.476	2	9	1.1.1.980.5	Winner
0	92.7	DMGTDGKEELK	Oxidation(M)@2	missed K-E@7	0.0003	1237.55	3	11	1.1.1.857.2	Winner
0	85.7	PMVIQESK	Oxidation(M)@2	cleaved R-P@N-term	-0.0041	946.475	2	9	1.1.1.933.7	Winner
0	79.7	PMVIQESK	Oxidation(M)@2	cleaved R-P@N-term	0.0079	946.487	2	8	1.1.1.1009.6	Winner
0	68.7	PMVIQESK	Oxidation(M)@2	cleaved R-P@N-term	-0.0035	946.476	2	7	1.1.1.974.7	Winner
0	54	DMGTDGKEELK	Oxidation(M)@2	missed K-E@7	0.0001	1237.55	3	9	1.1.1.865.2	Winner
0	51.9	PMVIQESK	Oxidation(M)@2	cleaved R-P@N-term	-0.0035	946.476	2	6	1.1.1.939.6	Winner
0	42.1	DMGTDGKEELK	Oxidation(M)@2	missed K-E@7	0.0006	1237.55	3	8	1.1.1.847.2	Winner
0	35.9	PMVIQESK	Oxidation(M)@2	cleaved R-P@N-term	0.0025	946.482	2	8	1.1.1.991.5	Winner
0	18	DMGTDGKEELKADVVPVTLAPK	Oxidation(M)@2; Cation:K(D)@13	missed K-E@7; missed K-A@11	-0.0093	2366.14	4	10	1.1.1.1493.4	Winner
0.25	99	DMGTDGKEELKADVV	Oxidation(M)@2; Dehydrated(D)@13	cleaved V-P@C-term; missed K-E@7; missed K-A@11	-0.004	1603.74	2	16	1.1.1.1488.13	Winner
0	99	DMGTDGKEELKADVV	Oxidation(M)@2; Dehydrated(D)@13	cleaved V-P@C-term; missed K-E@7; missed K-A@11	-0.004	1603.74	2	13	1.1.1.1495.9	Winner
0	33.1	DMGTDGKEELKADVVPVTLAPK	Oxidation(M)@2; Lys->Allysine(K)@11	missed K-E@7; missed K-A@11	0.0245	2327.18	4	11	1.1.1.1527.3	Winner
0.65	98.9	SFMTSPSPK	Oxidation(M)@3	cleaved P-S@N-term	0.0005	996.459	2	10	1.1.1.954.7	Winner
0	95	SFMTSPSPK	Oxidation(M)@3	cleaved P-S@N-term	0.0005	996.459	2	9	1.1.1.959.5	Winner
0	92.5	SFMTSPSPK	Oxidation(M)@3	cleaved P-S@N-term	0.0005	996.459	2	7	1.1.1.949.8	Winner
0	99	ENMEELLNLCSGK	Oxidation(M)@3; Cys->Dha(C)@10		-0.0029	1460.68	2	16	1.1.1.1505.7	Winner
0	99	ENMEELLNLCSGK	Oxidation(M)@3; Cys->Dha(C)@10		-0.0029	1460.68	2	12	1.1.1.1487.10	Winner
0	99	ENMEELLNLCSGK	Oxidation(M)@3; Cys->Dha(C)@10		-0.0034	1460.68	2	18	1.1.1.1517.6	Winner
0	99	ENMEELLNLCSGK	Oxidation(M)@3; Cys->Dha(C)@10		-0.0034	1460.68	2	17	1.1.1.1523.8	Winner
0	99	ENMEELLNLCSGK	Oxidation(M)@3; Cys->Dha(C)@10		-0.0034	1460.68	2	18	1.1.1.1511.7	Winner
0	99	ENMEELLNLCSGK	Oxidation(M)@3; Cys->Dha(C)@10		-0.0034	1460.68	2	10	1.1.1.1463.9	Winner
0	99	ENMEELLNLCSGK	Oxidation(M)@3; Cys->Dha(C)@10		-0.0034	1460.68	2	10	1.1.1.1474.11	Winner
0	99	ENMEELLNLCSGK	Oxidation(M)@3; Cys->Dha(C)@10		-0.0029	1460.68	2	15	1.1.1.1493.7	Winner
0	99	ENMEELLNLCSGK	Oxidation(M)@3; Cys->Dha(C)@10		-0.0034	1460.68	2	13	1.1.1.1469.8	Winner
0	99	ENMEELLNLCSGK	Oxidation(M)@3; Cys->Dha(C)@10		-0.0029	1460.68	2	15	1.1.1.1499.8	Winner
0	62.2	ENMEELLNLCSGK	Oxidation(M)@3; Dioxidation(C)@10		0.0008	1526.66	2	9	1.1.1.1500.13	Winner
0	66.6	ENMEELLNLCSGK	Oxidation(M)@3; Propionamide(C)@10		0.0062	1565.71	2	11	1.1.1.1496.10	Winner
0	99	ENMEELLNLCSGK	Oxidation(M)@3; Trioxidation(C)@10		-0.002	1542.65	2	21	1.1.1.1516.6	Winner
0	99	ENMEELLNLCSGK	Oxidation(M)@3; Trioxidation(C)@10		-0.002	1542.65	2	21	1.1.1.1510.6	Winner
0	99	ENMEELLNLCSGK	Oxidation(M)@3; Trioxidation(C)@10		-0.0048	1542.65	2	16	1.1.1.1522.10	Winner
0	99	ENMEELLNLCSGK	Oxidation(M)@3; Trioxidation(C)@10		-0.004	1542.65	2	14	1.1.1.1502.15	Winner
0	99	ENMEELLNLCSGK	Oxidation(M)@3; Trioxidation(C)@10		-0.002	1542.65	2	22	1.1.1.1504.9	Winner
0	99	ENMEELLNLCSGK	Oxidation(M)@3; Trioxidation(C)@10; Formyl(K)@13		0.0172	1570.67	2	16	1.1.1.1637.11	Winner
0	99	ENMEELLNLCSGK	Oxidation(M)@3; Trioxidation(C)@10; Formyl(K)@13		0.0172	1570.67	2	16	1.1.1.1642.7	Winner
0	99	ENMEELLNLCSGK	Oxidation(M)@3; Trioxidation(C)@10; Formyl(K)@13		0.0174	1570.67	2	15	1.1.1.1627.10	Winner
0	99	ENMEELLNLCSGK	Oxidation(M)@3; Trioxidation(C)@10; Formyl(K)@13		0.0174	1570.67	2	13	1.1.1.1648.12	Winner
0	99	ENMEELLNLCSGK	Oxidation(M)@3; Trioxidation(C)@10; Formyl(K)@13		0.0172	1570.67	2	17	1.1.1.1632.10	Winner
0	99	SRPMVIQESK	Oxidation(M)@4	cleaved A-S@N-term	-0.0024	1189.61	2	13	1.1.1.926.3	Winner
2	99	SRPMVIQESK	Oxidation(M)@4	cleaved A-S@N-term	-0.0024	1189.61	2	14	1.1.1.932.4	Winner
0	92.5	SRPMVIQESK	Oxidation(M)@4	cleaved A-S@N-term	-0.0024	1189.61	2	10	1.1.1.938.3	Winner
0	48.1	KENMEELLNLCSGK	Oxidation(M)@4; Cys->Dha(C)@11	missed K-E@1	0.0021	1588.78	3	10	1.1.1.1370.6	Winner
0.01	48.9	ESSMGDPMEEALAL	Oxidation(M)@4; Oxidation(M)@8	cleaved L-C@C-term	-0.0014	1510.62	2	8	1.1.1.1563.5	Winner
0	99	KENMEELLNLCSGK	Oxidation(M)@4; Trioxidation(C)@11	missed K-E@1	-0.003	1670.75	2	19	1.1.1.1385.14	Winner
0	99	KENMEELLNLCSGK	Oxidation(M)@4; Trioxidation(C)@11	missed K-E@1	-0.003	1670.75	2	19	1.1.1.1395.12	Winner
1.62	99	KENMEELLNLCSGK	Oxidation(M)@4; Trioxidation(C)@11	missed K-E@1	-0.003	1670.75	2	18	1.1.1.1390.14	Winner
0	99	KENMEELLNLCSGK	Oxidation(M)@4; Trioxidation(C)@11; Formyl(K)@14	missed K-E@1	0.0207	1698.76	3	14	1.1.1.1503.4	Winner
0	99	KENMEELLNLCSGK	Oxidation(M)@4; Trioxidation(C)@11; Formyl(K)@14	missed K-E@1	0.0207	1698.76	3	14	1.1.1.1509.4	Winner
2	99	ASRPMVIQESK	Oxidation(M)@5	cleaved N-A@N-term	0.001	1260.65	3	15	1.1.1.917.2	Winner
0	99	ASRPMVIQESK	Oxidation(M)@5	cleaved N-A@N-term	0.001	1260.65	3	11	1.1.1.922.2	Winner
0	99	DEKEMDKENNDGSSEIGK	Oxidation(M)@5	missed K-E@3; missed K-E@7	-0.0026	2039.86	4	19	1.1.1.854.2	Winner
0	99	DEKEMDKENNDGSSEIGK	Oxidation(M)@5	missed K-E@3; missed K-E@7	-0.003	2039.86	4	14	1.1.1.841.2	Winner
0	99	DEKEMDKENNDGSSEIGK	Oxidation(M)@5	missed K-E@3; missed K-E@7	-0.0026	2039.86	4	17	1.1.1.859.2	Winner
0	99	GPSFMTSPSPK	Oxidation(M)@5		0.0007	1150.53	2	18	1.1.1.1068.5	Winner
0	99	GPSFMTSPSPK	Oxidation(M)@5		0.0007	1150.53	2	19	1.1.1.1079.14	Winner
0	99	GPSFMTSPSPK	Oxidation(M)@5		0.0007	1150.53	2	15	1.1.1.1089.15	Winner
0	99	GPSFMTSPSPK	Oxidation(M)@5		0.0007	1150.53	2	19	1.1.1.1074.10	Winner
2	99	GPSFMTSPSPK	Oxidation(M)@5		0.0007	1150.53	2	19	1.1.1.1084.14	Winner
0	99	GPSFMTSPSPK	Oxidation(M)@5		-0.0007	1150.53	2	11	1.1.1.1097.10	Winner
0	95.5	GPSFMTSPSPK	Oxidation(M)@5		0.0009	1150.53	2	9	1.1.1.1062.7	Winner
0	80.7	ASRPMVIQESK	Oxidation(M)@5	cleaved N-A@N-term	0.001	1260.65	3	9	1.1.1.911.4	Winner
0	34.7	GPSFMTSPSPK	Oxidation(M)@5		0.0157	1150.55	2	9	1.1.1.1119.6	Winner
0	31.8	GPSFMTSPSPK	Oxidation(M)@5		0.0065	1150.54	2	7	1.1.1.1106.12	Winner
0	18.8	ASRPMVIQESK	Oxidation(M)@5	cleaved N-A@N-term	-0.003	1260.65	2	7	1.1.1.931.5	Winner
0	99	DEKEMDKENNDGSSEIGK	Oxidation(M)@5; Deamidated(N)@9	missed K-E@3; missed K-E@7	-0.0057	2040.84	3	13	1.1.1.872.5	Winner
0	99	DEKEMDKENNDGSSEIGK	Oxidation(M)@5; Deamidated(N)@9	missed K-E@3; missed K-E@7	0.0005	2040.84	4	16	1.1.1.869.2	Winner
0	99	NASRPMVIQESK	Oxidation(M)@6		0.0017	1374.69	3	13	1.1.1.961.4	Winner
0	99	NASRPMVIQESK	Oxidation(M)@6		-0.0007	1374.69	3	14	1.1.1.925.4	Winner
0	99	NASRPMVIQESK	Oxidation(M)@6		-0.0007	1374.69	3	14	1.1.1.936.5	Winner
0	99	NASRPMVIQESK	Oxidation(M)@6		-0.0007	1374.69	3	13	1.1.1.942.3	Winner
0	99	NASRPMVIQESK	Oxidation(M)@6		-0.0007	1374.69	3	14	1.1.1.930.4	Winner
0	99	NASRPMVIQESK	Oxidation(M)@6		-0.0007	1374.69	3	13	1.1.1.947.2	Winner
1.07	99	NLPYHMPENK	Oxidation(M)@6	cleaved L-N@N-term	0.0006	1257.58	2	9	1.1.1.1326.20	Winner
0	99	RGPSFMTSPSPK	Oxidation(M)@6	missed R-G@1	0.001	1306.64	3	16	1.1.1.1013.3	Winner
0	99	RGPSFMTSPSPK	Oxidation(M)@6	missed R-G@1	0.001	1306.64	3	14	1.1.1.1007.3	Winner
0	99	RGPSFMTSPSPK	Oxidation(M)@6	missed R-G@1	0.001	1306.64	3	13	1.1.1.1018.2	Winner
0	79.7	RGPSFMTSPSPK	Oxidation(M)@6	missed R-G@1	0.0013	1306.64	3	10	1.1.1.1023.2	Winner
0	64.8	NASRPMVIQESK	Oxidation(M)@6		-0.0025	1374.69	3	10	1.1.1.966.4	Winner
0	39.8	NASRPMVIQESK	Oxidation(M)@6		-0.0007	1374.69	3	9	1.1.1.920.6	Winner
0	99	NASRPMVIQESK	Oxidation(M)@6; Deamidated(Q)@9		-0.0006	1375.68	2	11	1.1.1.951.6	Winner
0	95.3	NASRPMVIQESK	Oxidation(M)@6; Deamidated(Q)@9		0.0032	1375.68	3	12	1.1.1.956.6	Winner
0	64	LPLASMDENAMDANMDELLDLCTGK	Oxidation(M)@6; Dioxidation(M)@11; Deamidated(N)@14; Dehydrated(T)@23		0.0376	2740.2	3	13	1.1.1.1785.4	Winner
0.07	99	LPLASMDENAMDANMDELLDL	Oxidation(M)@6; Oxidation(M)@11; Oxidation(M)@15; Amidated@C-term	cleaved L-C@C-term	-0.0036	2367.02	3	14	1.1.1.1875.8	Winner
0	99	LPLASMDENAMDANMDELLDLCTGK	Oxidation(M)@6; Oxidation(M)@11; Oxidation(M)@15; Cys->Dha(C)@22		0.0073	2723.2	3	22	1.1.1.1763.11	Winner
2	99	LPLASMDENAMDANMDELLDLCTGK	Oxidation(M)@6; Oxidation(M)@11; Oxidation(M)@15; Cys->Dha(C)@22		-0.0007	2723.2	3	26	1.1.1.1804.9	Winner
0	99	LPLASMDENAMDANMDELLDLCTGK	Oxidation(M)@6; Oxidation(M)@11; Oxidation(M)@15; Cys->Dha(C)@22		0.0073	2723.2	3	24	1.1.1.1773.8	Winner
0	99	LPLASMDENAMDANMDELLDLCTGK	Oxidation(M)@6; Oxidation(M)@11; Oxidation(M)@15; Cys->Dha(C)@22		0.0073	2723.2	3	29	1.1.1.1768.9	Winner
0	99	LPLASMDENAMDANMDELLDLCTGK	Oxidation(M)@6; Oxidation(M)@11; Oxidation(M)@15; Trioxidation(C)@22		0.0058	2805.18	3	31	1.1.1.1768.10	Winner
0	99	LPLASMDENAMDANMDELLDLCTGK	Oxidation(M)@6; Oxidation(M)@11; Oxidation(M)@15; Trioxidation(C)@22		0.0058	2805.18	3	25	1.1.1.1763.12	Winner
0	99	LPLASMDENAMDANMDELLDLCTGK	Oxidation(M)@6; Oxidation(M)@11; Oxidation(M)@15; Trioxidation(C)@22		0.0058	2805.18	3	28	1.1.1.1758.10	Winner
1.62	97.6	KRGPSFMTSPSPK	Oxidation(M)@7	missed K-R@1; missed R-G@2	-0.0022	1434.73	3	12	1.1.1.914.4	Winner
0	85.7	KRGPSFMTSPSPK	Oxidation(M)@7	missed K-R@1; missed R-G@2	-0.0022	1434.73	3	10	1.1.1.919.9	Winner
0	30.6	KRGPSFMTSPSPK	Oxidation(M)@7	missed K-R@1; missed R-G@2	-0.0022	1434.73	3	8	1.1.1.924.6	Winner
2	99	NIDDASQMDLF	Oxidation(M)@8	cleaved F-H@C-term	-0.0041	1283.53	2	11	1.1.1.1600.8	Winner
0	99	NIDDASQMDLFHR	Oxidation(M)@8		-0.0016	1576.69	3	13	1.1.1.1350.5	Winner
0	99	NIDDASQMDLFHR	Oxidation(M)@8		-0.0016	1576.69	3	10	1.1.1.1355.9	Winner
0	99	NIDDASQMDLFHR	Oxidation(M)@8		-0.0016	1576.69	3	14	1.1.1.1335.10	Winner
0	99	NIDDASQMDLFHR	Oxidation(M)@8		-0.0016	1576.69	3	14	1.1.1.1340.11	Winner
0	97.5	NIDDASQMDLFHR	Oxidation(M)@8		-0.0016	1576.69	3	12	1.1.1.1345.8	Winner
0	70.1	NIDDASQMDLFHR	Oxidation(M)@8		-0.0016	1576.69	3	8	1.1.1.1330.13	Winner
0	64	LGADEDSFVILEPETNRELEALK	Oxidation(P)@13; Phospho(T)@15; Arg->GluSA(R)@17	missed R-E@17	0.0104	2640.22	3	13	1.1.1.1893.7	Winner
0	64	LGADEDSFVILEPETNRELEALK	Oxidation(P)@13; Phospho(T)@15; Arg->GluSA(R)@17	missed R-E@17	0.0104	2640.22	3	13	1.1.1.1896.5	Winner
0	93.4	NASRPMVIQESK	Oxidation(P)@5; Oxidation(M)@6		-0.0023	1390.69	3	11	1.1.1.952.3	Winner
0	93.4	NASRPMVIQESK	Oxidation(P)@5; Oxidation(M)@6		-0.0023	1390.69	3	11	1.1.1.947.3	Winner
0	40.5	LSEPSLPIEDSQDLYNASPEPK	Oxidation(P)@7; Cation:K(E)@9		-0.0356	2482.08	3	12	1.1.1.1705.7	Winner
0	99	LSEPSLPIEDSQDLYNASPEPK	Oxidation(P)@7; Cation:K(E)@9; Oxidation(Y)@15; Ammonia-loss(N)@16		-0.004	2481.08	3	19	1.1.1.1715.11	Winner
0	7.7	SPSPGLFR	Phospho(S)@1		0.006	939.428	2	6	1.1.1.1637.3	Winner
0	99	FTSQDASTPASSELNKQEK	Phospho(S)@12	missed K-Q@16	-0.0033	2146.94	3	15	1.1.1.1191.8	Winner
0	64	GSEQTTGAENEVETNALPVVSK	Phospho(S)@2; Dehydrated(T)@5; Dehydrated(T)@6		0.0167	2303.05	3	10	1.1.1.1455.13	Winner
0	99	SLSSDSTLLLFK	Phospho(S)@3		0.0028	1389.68	2	19	1.1.1.2160.2	Winner
0	99	SLSSDSTLLLFK	Phospho(S)@3		0.0028	1389.68	2	17	1.1.1.2227.5	Winner
0	99	SLSSDSTLLLFK	Phospho(S)@3		0.0046	1389.68	2	19	1.1.1.2195.2	Winner
0	99	SLSSDSTLLLFK	Phospho(S)@3		0.003	1389.68	2	18	1.1.1.2258.2	Winner
0	99	SLSSDSTLLLFK	Phospho(S)@3		0.0028	1389.68	2	19	1.1.1.2233.4	Winner
0	99	SLSSDSTLLLFK	Phospho(S)@3		0.0024	1389.68	2	19	1.1.1.2205.3	Winner
0	99	SLSSDSTLLLFK	Phospho(S)@3		0.0027	1389.68	2	21	1.1.1.2175.3	Winner
0	99	SLSSDSTLLLFK	Phospho(S)@3		0.002	1389.68	2	20	1.1.1.2185.3	Winner
0	99	SLSSDSTLLLFK	Phospho(S)@3		0.0023	1389.68	2	19	1.1.1.2137.3	Winner
0	99	SLSSDSTLLLFK	Phospho(S)@3		0.0014	1389.68	2	19	1.1.1.2216.3	Winner
0	99	SLSSDSTLLLFK	Phospho(S)@3		0.0017	1389.68	2	19	1.1.1.2250.5	Winner
0	99	SLSSDSTLLLFK	Phospho(S)@3		0.0046	1389.68	2	19	1.1.1.2190.3	Winner
0	99	SLSSDSTLLLFK	Phospho(S)@3		0.005	1389.68	2	20	1.1.1.2150.4	Winner
0	99	SLSSDSTLLLFK	Phospho(S)@3		0.0046	1389.68	2	17	1.1.1.2200.4	Winner
0	99	SLSSDSTLLLFK	Phospho(S)@3		0.0048	1389.68	2	19	1.1.1.2145.3	Winner
0	99	SLSSDSTLLLFK	Phospho(S)@3		0.0017	1389.68	2	19	1.1.1.2242.2	Winner
0	99	SPSPGLFR	Phospho(S)@3		0.0012	939.423	2	10	1.1.1.1483.2	Winner
0	99	SPSPGLFR	Phospho(S)@3		0.0012	939.423	2	11	1.1.1.1447.3	Winner
2	99	SPSPGLFR	Phospho(S)@3		0.0012	939.423	2	12	1.1.1.1442.3	Winner
0	99	SPSPGLFR	Phospho(S)@3		0.0012	939.423	2	11	1.1.1.1432.6	Winner
0	99	SPSPGLFR	Phospho(S)@3		0.0016	939.423	2	8	1.1.1.1422.7	Winner
0	99	SPSPGLFR	Phospho(S)@3		0.0014	939.423	2	11	1.1.1.1468.3	Winner
0	99	SPSPGLFR	Phospho(S)@3		0.0018	939.423	2	11	1.1.1.1473.3	Winner
0	99	SPSPGLFR	Phospho(S)@3		0.0018	939.423	2	9	1.1.1.1554.4	Winner
0	99	SPSPGLFR	Phospho(S)@3		0.0012	939.423	2	10	1.1.1.1478.3	Winner
0	99	SPSPGLFR	Phospho(S)@3		0.0012	939.423	2	9	1.1.1.1580.3	Winner
0	99	SPSPGLFR	Phospho(S)@3		0.0014	939.423	2	9	1.1.1.1585.2	Winner
0	99	SPSPGLFR	Phospho(S)@3		0.0018	939.423	2	10	1.1.1.1539.4	Winner
0	99	SPSPGLFR	Phospho(S)@3		0.0014	939.423	2	10	1.1.1.1462.4	Winner
0	99	SPSPGLFR	Phospho(S)@3		0.0018	939.423	2	10	1.1.1.1549.4	Winner
0	99	SPSPGLFR	Phospho(S)@3		-0.0002	939.421	2	10	1.1.1.1518.4	Winner
0	99	SPSPGLFR	Phospho(S)@3		-0.0004	939.421	2	8	1.1.1.1605.2	Winner
0	99	SPSPGLFR	Phospho(S)@3		0.0012	939.423	2	12	1.1.1.1452.2	Winner
0	99	SPSPGLFR	Phospho(S)@3		0.0012	939.423	2	10	1.1.1.1457.3	Winner
0	99	SPSPGLFR	Phospho(S)@3		0.0012	939.423	2	11	1.1.1.1437.6	Winner
0	99	SPSPGLFR	Phospho(S)@3		0.0012	939.423	2	10	1.1.1.1427.7	Winner
0	99	SPSPGLFR	Phospho(S)@3		0.0012	939.423	2	10	1.1.1.1564.4	Winner
0	82.2	SPSPGLFR	Phospho(S)@3		0.0014	939.423	2	10	1.1.1.1569.4	Winner
0	74.1	SPSPGLFR	Phospho(S)@3		-0.0002	939.421	2	8	1.1.1.1590.3	Winner
0	74.1	SPSPGLFR	Phospho(S)@3		0.0012	939.423	2	10	1.1.1.1559.4	Winner
0	69.1	SPSPGLFR	Phospho(S)@3		-0.0002	939.421	2	9	1.1.1.1494.3	Winner
0	67.8	SPSPGLFR	Phospho(S)@3		0.0014	939.423	2	9	1.1.1.1488.3	Winner
0	66.6	SPSPGLFR	Phospho(S)@3		0	939.421	2	10	1.1.1.1506.3	Winner
0	63.7	SPSPGLFR	Phospho(S)@3		0.0016	939.423	2	9	1.1.1.1529.3	Winner
0	63.7	SPSPGLFR	Phospho(S)@3		0.0016	939.423	2	9	1.1.1.1534.4	Winner
0	60.3	SPSPGLFR	Phospho(S)@3		0.0014	939.423	2	8	1.1.1.1524.4	Winner
0	59.8	SPSPGLFR	Phospho(S)@3		0.0012	939.423	2	9	1.1.1.1575.4	Winner
0	59.4	SPSPGLFR	Phospho(S)@3		0.0058	939.427	2	8	1.1.1.1615.2	Winner
0	59	SPSPGLFR	Phospho(S)@3		-0.0002	939.421	2	9	1.1.1.1512.4	Winner
0	51.8	SPSPGLFR	Phospho(S)@3		0	939.421	2	8	1.1.1.1500.5	Winner
0	50.5	SPSPGLFR	Phospho(S)@3		0.0016	939.423	2	8	1.1.1.1544.4	Winner
0	49.9	SPSPGLFR	Phospho(S)@3		-0.0004	939.421	2	7	1.1.1.1600.2	Winner
0	35	SPSPGLFR	Phospho(S)@3		-0.0002	939.421	2	6	1.1.1.1595.2	Winner
0	28.2	SPSPGLFR	Phospho(S)@3		-0.0006	939.421	2	5	1.1.1.1610.2	Winner
0	19.2	SPSPGLFR	Phospho(S)@3		-0.0002	939.421	2	5	1.1.1.1417.5	Winner
0	18	SPSPGLFR	Phospho(S)@3; Deamidated(R)@8		0.0191	940.425	2	7	1.1.1.1445.2	Winner
0	52.8	LDEDDSCSLLTK	Phospho(S)@6; Methyl(C)@7; Dehydrated(S)@8		0.0283	1413.6	2	12	1.1.1.1460.7	Winner
0	99	NFVFHTLSPVK	Phospho(S)@8		-0.0018	1367.66	2	14	1.1.1.1621.4	Winner
0	99	NFVFHTLSPVK	Phospho(S)@8		0.0014	1367.67	2	14	1.1.1.1727.3	Winner
0	99	NFVFHTLSPVK	Phospho(S)@8		-0.0015	1367.66	2	17	1.1.1.1673.5	Winner
0	99	NFVFHTLSPVK	Phospho(S)@8		-0.0018	1367.66	2	16	1.1.1.1663.8	Winner
0	99	NFVFHTLSPVK	Phospho(S)@8		-0.0012	1367.66	2	10	1.1.1.1720.2	Winner
0	99	NFVFHTLSPVK	Phospho(S)@8		-0.0011	1367.66	2	10	1.1.1.1704.8	Winner
0	99	NFVFHTLSPVK	Phospho(S)@8		-0.0012	1367.66	2	13	1.1.1.1715.6	Winner
0	99	NFVFHTLSPVK	Phospho(S)@8		-0.0012	1367.66	2	14	1.1.1.1683.8	Winner
0	99	NFVFHTLSPVK	Phospho(S)@8		-0.0011	1367.66	2	16	1.1.1.1678.5	Winner
0	99	NFVFHTLSPVK	Phospho(S)@8		-0.0008	1367.66	2	12	1.1.1.1698.5	Winner
0	99	NFVFHTLSPVK	Phospho(S)@8		0.0013	1367.67	3	11	1.1.1.1632.2	Winner
0	99	NFVFHTLSPVK	Phospho(S)@8		-0.0011	1367.66	2	15	1.1.1.1710.7	Winner
0	99	NFVFHTLSPVK	Phospho(S)@8		-0.0008	1367.66	2	12	1.1.1.1693.8	Winner
0	99	NFVFHTLSPVK	Phospho(S)@8		-0.0012	1367.66	2	17	1.1.1.1652.10	Winner
0	99	NFVFHTLSPVK	Phospho(S)@8		-0.0017	1367.66	2	18	1.1.1.1631.5	Winner
0	99	NFVFHTLSPVK	Phospho(S)@8		-0.0017	1367.66	2	14	1.1.1.1688.5	Winner
0	99	NFVFHTLSPVK	Phospho(S)@8		-0.0018	1367.66	2	16	1.1.1.1668.8	Winner
0	99	NFVFHTLSPVK	Phospho(S)@8		-0.0017	1367.66	2	16	1.1.1.1658.11	Winner
0	99	NFVFHTLSPVK	Phospho(S)@8		-0.0017	1367.66	2	17	1.1.1.1636.8	Winner
0	99	NFVFHTLSPVK	Phospho(S)@8		0.0014	1367.67	2	13	1.1.1.1732.5	Winner
0	99	NFVFHTLSPVK	Phospho(S)@8		-0.0017	1367.66	2	17	1.1.1.1641.5	Winner
0	99	NFVFHTLSPVK	Phospho(S)@8		-0.0017	1367.66	2	16	1.1.1.1647.7	Winner
0	99	NFVFHTLSPVKAEAAK	Phospho(S)@8	missed K-A@11	-0.0023	1837.91	3	17	1.1.1.1597.3	Winner
0	99	NFVFHTLSPVKAEAAK	Phospho(S)@8	missed K-A@11	-0.0023	1837.91	3	20	1.1.1.1602.3	Winner
0	99	NFVFHTLSPVKAEAAK	Phospho(S)@8	missed K-A@11	-0.0023	1837.91	2	14	1.1.1.1546.10	Winner
0	99	NFVFHTLSPVKAEAAK	Phospho(S)@8	missed K-A@11	0.0007	1837.91	3	23	1.1.1.1550.8	Winner
0	99	NFVFHTLSPVKAEAAK	Phospho(S)@8	missed K-A@11	0.0007	1837.91	3	24	1.1.1.1545.6	Winner
0	99	NFVFHTLSPVKAEAAK	Phospho(S)@8	missed K-A@11	0.0005	1837.91	3	22	1.1.1.1565.5	Winner
0	99	NFVFHTLSPVKAEAAK	Phospho(S)@8	missed K-A@11	-0.0026	1837.91	3	19	1.1.1.1581.6	Winner
0	99	NFVFHTLSPVKAEAAK	Phospho(S)@8	missed K-A@11	-0.0032	1837.91	3	18	1.1.1.1576.6	Winner
2	99	NFVFHTLSPVKAEAAK	Phospho(S)@8	missed K-A@11	-0.0032	1837.91	3	14	1.1.1.1586.7	Winner
0	99	NFVFHTLSPVKAEAAK	Phospho(S)@8	missed K-A@11	-0.0026	1837.91	3	12	1.1.1.1592.7	Winner
0	99	NFVFHTLSPVKAEAAK	Phospho(S)@8	missed K-A@11	-0.0026	1837.91	3	17	1.1.1.1607.3	Winner
0	99	NFVFHTLSPVKAEAAK	Phospho(S)@8	missed K-A@11	-0.0026	1837.91	3	19	1.1.1.1570.5	Winner
0	99	NFVFHTLSPVKAEAAK	Phospho(S)@8	missed K-A@11	0.001	1837.91	3	21	1.1.1.1560.6	Winner
0	99	NFVFHTLSPVKAEAAK	Phospho(S)@8	missed K-A@11	0.0007	1837.91	3	22	1.1.1.1555.7	Winner
0	99	NFVFHTLSPVKAEAAK	Phospho(S)@8	missed K-A@11	0.0007	1837.91	3	22	1.1.1.1540.6	Winner
0	99	NFVFHTLSPVKAEAAK	Phospho(S)@8	missed K-A@11	0.0014	1837.91	3	11	1.1.1.1535.8	Winner
0	58	NFVFHTLSPVK	Phospho(S)@8		0.0051	1367.67	2	9	1.1.1.1754.6	Winner
0	48.3	NFVFHTLSPVK	Phospho(S)@8		0.0022	1367.67	3	9	1.1.1.1662.3	Winner
0	48	NFVFHTLSPVK	Phospho(S)@8		0.0014	1367.67	2	9	1.1.1.1737.5	Winner
0	28.2	NFVFHTLSPVK	Phospho(S)@8		0.0018	1367.67	3	8	1.1.1.1647.2	Winner
0	27.9	NFVFHTLSPVK	Phospho(S)@8		0.0042	1367.67	2	8	1.1.1.1745.10	Winner
0	35.3	LGADEDSFVILEPETNRGEKLQV	Phospho(T)@15; Deamidated(N)@16; Deamidated(Q)@22	cleaved V-L@C-term; missed R-G@17; missed K-L@20	-0.0008	2640.22	3	11	1.1.1.1896.5	Other
0	81.8	ETQIITGSDESCRK	Phospho(T)@2	missed R-K@13	-0.008	1645.69	2	10	1.1.1.1075.5	Winner
0	73.8	ETQIITGSDESCRK	Phospho(T)@2	missed R-K@13	-0.008	1645.69	2	8	1.1.1.1070.10	Winner
0	99	PTCHGNAMALLK	Phospho(T)@2; Cys->Dha(C)@3; Methyl(H)@4; Oxidation(M)@8	cleaved R-P@N-term	-0.0115	1330.6	2	12	1.1.1.1169.14	Winner
0	61.8	RFTLDR	Phospho(T)@3	missed R-F@1	0.0022	886.408	2	8	1.1.1.1160.4	Winner
0	21.6	RFTLDR	Phospho(T)@3	missed R-F@1	0	886.406	2	5	1.1.1.1148.6	Winner
0	19	RFTLDR	Phospho(T)@3	missed R-F@1	-0.001	886.405	2	5	1.1.1.1177.6	Winner
0	18.8	RFTLDR	Phospho(T)@3	missed R-F@1	-0.0004	886.406	2	5	1.1.1.1192.5	Winner
0	99	NFVFHTLSPVK	Phospho(T)@6		-0.0015	1367.66	2	16	1.1.1.1626.7	Winner
0	94.6	QPSKLDEDDSCSLLTK	Propionamide(C)@11	missed K-L@4	-0.0006	1848.88	3	12	1.1.1.1304.9	Winner
0	73.1	QPSKLDEDDSCSLLTK	Propionamide(C)@11	missed K-L@4	-0.0006	1848.88	3	11	1.1.1.1299.9	Winner
0	99	ETQIITGSDESCR	Propionamide(C)@12		0.001	1508.68	2	18	1.1.1.1128.16	Winner
0	99	ETQIITGSDESCR	Propionamide(C)@12		0.001	1508.68	2	15	1.1.1.1113.15	Winner
0	99	ETQIITGSDESCR	Propionamide(C)@12		0.001	1508.68	2	20	1.1.1.1118.17	Winner
0	99	ETQIITGSDESCR	Propionamide(C)@12		0.001	1508.68	2	14	1.1.1.1133.11	Winner
0	99	ETQIITGSDESCR	Propionamide(C)@12		0.001	1508.68	2	21	1.1.1.1123.16	Winner
0	99	ETQIITGSDESCRK	Propionamide(C)@12	missed R-K@13	0.0002	1636.77	3	15	1.1.1.1021.11	Winner
0	99	ETQIITGSDESCRK	Propionamide(C)@12	missed R-K@13	0.0002	1636.77	3	15	1.1.1.1026.14	Winner
0	99	ETQIITGSDESCRK	Propionamide(C)@12	missed R-K@13	0.0002	1636.77	3	13	1.1.1.1031.11	Winner
0	99	ETQIITGSDESCRK	Propionamide(C)@12	missed R-K@13	0.0002	1636.77	3	15	1.1.1.1016.12	Winner
0	99	ETQIITGSDESCRK	Propionamide(C)@12	missed R-K@13	0.0002	1636.77	3	14	1.1.1.1011.11	Winner
0	95.1	ETQIITGSDESCRK	Propionamide(C)@12	missed R-K@13	-0.0002	1636.77	3	11	1.1.1.1036.12	Winner
0	18.8	ETQIITGSDESCRK	Propionamide(C)@12; Deamidated(R)@13	missed R-K@13	0.0016	1637.76	3	8	1.1.1.1066.8	Winner
0	99	ETQIITGSDESCR	Propionamide(C)@12; Dioxidation(R)@13		-0.0198	1540.65	2	15	1.1.1.1195.4	Winner
0	99	NQEDDVEQPFNDSGCLLVDK	Propionamide(C)@15		-0.0076	2335.02	3	16	1.1.1.1648.11	Winner
2	99	NQEDDVEQPFNDSGCLLVDK	Propionamide(C)@15		-0.0076	2335.02	3	15	1.1.1.1655.8	Winner
0	99	SETDENSGKQPSKLDEDDSCSLLTK	Propionamide(C)@20	missed K-Q@9; missed K-L@13	0	2796.26	4	17	1.1.1.1273.4	Winner
0	99	SETDENSGKQPSKLDEDDSCSLLTK	Propionamide(C)@20	missed K-Q@9; missed K-L@13	0	2796.26	4	15	1.1.1.1262.13	Winner
2	99	QSDIRPSPGDSSVLQQESNFLGNNHSEECQVGGLVAFEPHALEGEGPQNPEETDEKVEEPEQQNK	Propionamide(C)@29	missed K-V@56	-0.006	7184.27	6	27	1.1.1.1818.3	Winner
0	99	QSDIRPSPGDSSVLQQESNFLGNNHSEECQVGGLVAFEPHALEGEGPQNPEETDEKVEEPEQQNK	Propionamide(C)@29	missed K-V@56	-0.006	7184.27	6	23	1.1.1.1812.4	Winner
0	99	LDEDDSCSLLTK	Propionamide(C)@7		-0.001	1408.64	2	11	1.1.1.1340.19	Winner
0	99	LDEDDSCSLLTK	Propionamide(C)@7		-0.001	1408.64	2	15	1.1.1.1345.11	Winner
2	99	LDEDDSCSLLTK	Propionamide(C)@7		-0.001	1408.64	2	16	1.1.1.1350.9	Winner
0	88.8	LDEDDSCSLLTK	Propionamide(C)@7		0.0027	1408.64	2	9	1.1.1.1355.15	Winner
0	99	ENMEELLNLCSGK	Trioxidation(C)@10		0.0022	1526.66	2	18	1.1.1.1775.3	Winner
0	99	ENMEELLNLCSGK	Trioxidation(C)@10		0.0022	1526.66	2	21	1.1.1.1780.4	Winner
0	99	ENMEELLNLCSGK	Trioxidation(C)@10; Formyl(K)@13		0.018	1554.67	2	15	1.1.1.1903.2	Winner
0	99	ENMEELLNLCSGK	Trioxidation(C)@10; Formyl(K)@13		0.0181	1554.67	2	15	1.1.1.1896.3	Winner
0.36	99	QPSKLDEDDSCSLLTK	Trioxidation(C)@11	missed K-L@4	0.0005	1825.83	2	10	1.1.1.1297.11	Winner
0	99	ETQIITGSDESCR	Trioxidation(C)@12		0.003	1485.63	2	13	1.1.1.1129.10	Winner
0	99	ETQIITGSDESCR	Trioxidation(C)@12		0.003	1485.63	2	11	1.1.1.1134.13	Winner
0	99	ETQIITGSDESCR	Trioxidation(C)@12		0.003	1485.63	2	11	1.1.1.1139.16	Winner
0	99	ETQIITGSDESCRK	Trioxidation(C)@12	missed R-K@13	0.0023	1613.72	2	18	1.1.1.1046.10	Winner
0	99	ETQIITGSDESCRK	Trioxidation(C)@12	missed R-K@13	0.0023	1613.72	2	18	1.1.1.1036.13	Winner
0	99	ETQIITGSDESCRK	Trioxidation(C)@12	missed R-K@13	0.0023	1613.72	2	19	1.1.1.1041.13	Winner
0	99	ETQIITGSDESCRK	Trioxidation(C)@12	missed R-K@13	0.0023	1613.72	2	14	1.1.1.1051.14	Winner
0	99	ETQIITGSDESCR	Trioxidation(C)@12; Dimethyl(R)@13		-0.0199	1513.64	2	18	1.1.1.1206.15	Winner
0	99	ETQIITGSDESCR	Trioxidation(C)@12; Dimethyl(R)@13		-0.0202	1513.64	2	13	1.1.1.1216.15	Winner
0	99	ETQIITGSDESCR	Trioxidation(C)@12; Dimethyl(R)@13		-0.0199	1513.64	2	17	1.1.1.1211.13	Winner
0	99	ETQIITGSDESCRK	Trioxidation(C)@12; Formyl(K)@14	missed R-K@13	0.0194	1641.73	3	14	1.1.1.1083.6	Winner
0	99	ETQIITGSDESCRK	Trioxidation(C)@12; Formyl(K)@14	missed R-K@13	0.0194	1641.73	3	14	1.1.1.1088.12	Winner
0	99	SETDENSGKQPSKLDEDDSCSLLTK	Trioxidation(C)@20	missed K-Q@9; missed K-L@13	0.0017	2773.21	3	13	1.1.1.1263.16	Winner
2	99	SETDENSGKQPSKLDEDDSCSLLTK	Trioxidation(C)@20	missed K-Q@9; missed K-L@13	0.0017	2773.21	3	15	1.1.1.1257.11	Winner
0	99	PTCHGNAMALLK	Trioxidation(C)@3; Dioxidation(M)@8	cleaved R-P@N-term	-0.0005	1334.6	2	16	1.1.1.1181.13	Winner
0	99	PTCHGNAMALLK	Trioxidation(C)@3; Dioxidation(M)@8	cleaved R-P@N-term	-0.0005	1334.6	2	12	1.1.1.1186.10	Winner
0	99	PTCHGNAMALLK	Trioxidation(C)@3; Dioxidation(M)@8	cleaved R-P@N-term	-0.0005	1334.6	2	12	1.1.1.1171.13	Winner
0	99	PTCHGNAMALLK	Trioxidation(C)@3; Dioxidation(M)@8	cleaved R-P@N-term	-0.0005	1334.6	2	17	1.1.1.1176.15	Winner
0	99	PTCHGNAMALLK	Trioxidation(C)@3; Oxidation(M)@8	cleaved R-P@N-term	-0.0002	1318.6	2	19	1.1.1.1145.11	Winner
2	99	PTCHGNAMALLK	Trioxidation(C)@3; Oxidation(M)@8	cleaved R-P@N-term	-0.0005	1318.6	2	17	1.1.1.1150.11	Winner
0	99	PTCHGNAMALLK	Trioxidation(C)@3; Oxidation(M)@8	cleaved R-P@N-term	-0.0002	1318.6	2	19	1.1.1.1130.11	Winner
0	99	PTCHGNAMALLK	Trioxidation(C)@3; Oxidation(M)@8	cleaved R-P@N-term	-0.0002	1318.6	2	19	1.1.1.1135.15	Winner
0	99	PTCHGNAMALLK	Trioxidation(C)@3; Oxidation(M)@8	cleaved R-P@N-term	-0.0002	1318.6	2	21	1.1.1.1140.13	Winner
0.1	96	KPRPTCHGNAMALLK	Trioxidation(C)@6; Oxidation(M)@11		-0.0032	1699.85	3	11	1.1.1.999.12	Winner
0	99	LDEDDSCSLLTK	Trioxidation(C)@7		0.0032	1385.59	2	9	1.1.1.1340.18	Winner
0	93.4	LDEDDSCSLLTK	Trioxidation(C)@7		0.0032	1385.59	2	9	1.1.1.1333.16	Winner
0	99	AALSDHNPSAPR		cleaved L-A@N-term	-0.0001	1234.61	2	10	1.1.1.1101.11	Winner
0	99	AALSDHNPSAPR		cleaved L-A@N-term	-0.0001	1234.61	2	11	1.1.1.1088.15	Winner
2	99	AALSDHNPSAPR		cleaved L-A@N-term	-0.0001	1234.61	2	15	1.1.1.1094.11	Winner
0	99	ADGDLHSDGPGR		cleaved L-A@N-term	-0.0005	1195.52	2	14	1.1.1.1146.11	Winner
2	99	ADGDLHSDGPGR		cleaved L-A@N-term	-0.0005	1195.52	2	16	1.1.1.1151.11	Winner
0	99	ADGDLHSDGPGR		cleaved L-A@N-term	-0.0005	1195.52	2	14	1.1.1.1157.10	Winner
0	99	ADVVPVTLAPK			-0.002	1108.65	2	11	1.1.1.1445.4	Winner
0	99	ADVVPVTLAPK			0.0002	1108.65	2	16	1.1.1.1420.4	Winner
0	99	ADVVPVTLAPK			0.0002	1108.65	2	15	1.1.1.1415.2	Winner
0	99	ADVVPVTLAPK			0	1108.65	2	14	1.1.1.1440.5	Winner
2	99	ADVVPVTLAPK			-0.0014	1108.65	2	15	1.1.1.1435.5	Winner
0	99	ADVVPVTLAPK			0.0002	1108.65	2	16	1.1.1.1430.7	Winner
0	99	ADVVPVTLAPK			0.0002	1108.65	2	17	1.1.1.1425.6	Winner
0	99	AGQTVNVNVIVK			-0.0002	1240.71	2	15	1.1.1.1405.7	Winner
0	99	AGQTVNVNVIVK			-0.0005	1240.71	2	12	1.1.1.1421.7	Winner
0	99	AGQTVNVNVIVK			-0.0002	1240.71	2	14	1.1.1.1400.11	Winner
2	99	AGQTVNVNVIVK			-0.0014	1240.71	2	17	1.1.1.1364.9	Winner
0	99	AGQTVNVNVIVK			-0.0008	1240.71	2	20	1.1.1.1380.8	Winner
0	99	AGQTVNVNVIVK			-0.0021	1240.71	2	16	1.1.1.1395.10	Winner
0	99	AGQTVNVNVIVK			-0.0022	1240.71	2	17	1.1.1.1390.10	Winner
0	99	AGQTVNVNVIVK			-0.0008	1240.71	2	21	1.1.1.1375.8	Winner
0	99	AGQTVNVNVIVK			-0.0008	1240.71	2	18	1.1.1.1385.11	Winner
0	99	AGQTVNVNVIVK			-0.0008	1240.71	2	20	1.1.1.1370.11	Winner
0	99	AGQTVNVNVIVK			-0.0034	1240.71	2	13	1.1.1.1426.11	Winner
0	99	AGQTVNVNVIVK			-0.0024	1240.71	2	16	1.1.1.1410.7	Winner
0	99	AGQTVNVNVIVK			-0.0024	1240.71	2	16	1.1.1.1416.7	Winner
0	99	ALEGEGPQNPEETDEKVEEPEQQNK		cleaved H-A@N-term; missed K-V@16	-0.0024	2823.27	3	30	1.1.1.1208.18	Winner
0	99	ALEGEGPQNPEETDEKVEEPEQQNK		cleaved H-A@N-term; missed K-V@16	-0.002	2823.27	3	20	1.1.1.1220.7	Winner
2	99	ALEGEGPQNPEETDEKVEEPEQQNK		cleaved H-A@N-term; missed K-V@16	-0.0024	2823.27	3	26	1.1.1.1213.19	Winner
0	99	ALEGEGPQNPEETDEKVEEPEQQNK		cleaved H-A@N-term; missed K-V@16	-0.0024	2823.27	3	22	1.1.1.1203.15	Winner
0	99	ALSDHNPSAPR		cleaved A-A@N-term	0.0021	1163.57	2	13	1.1.1.1097.11	Winner
2	99	ALSDHNPSAPR		cleaved A-A@N-term	0.0021	1163.57	2	15	1.1.1.1091.16	Winner
2	99	ASLVSSASK			-0.0005	848.46	2	10	1.1.1.919.5	Winner
0	99	ASLVSSASK			0.0007	848.461	2	11	1.1.1.898.2	Winner
0	99	ASLVSSASK			0.0011	848.462	2	11	1.1.1.914.2	Winner
0	99	ASLVSSASK			0.0007	848.461	2	12	1.1.1.908.3	Winner
0	99	ASLVSSASK			0.0007	848.461	2	13	1.1.1.903.2	Winner
0	99	AVGFLSVPK			0.0021	916.54	2	10	1.1.1.1539.3	Winner
0	99	AVGFLSVPK			0.0007	916.539	2	15	1.1.1.1518.3	Winner
0	99	AVGFLSVPK			0.0007	916.539	2	12	1.1.1.1494.2	Winner
0	99	AVGFLSVPK			0.0023	916.54	2	9	1.1.1.1544.3	Winner
2	99	AVGFLSVPK			0.0006	916.539	2	15	1.1.1.1512.3	Winner
0	99	AVGFLSVPK			0.0006	916.539	2	15	1.1.1.1500.4	Winner
0	99	AVGFLSVPK			0.0006	916.539	2	14	1.1.1.1506.2	Winner
0	99	AVGFLSVPK			0.0006	916.539	2	10	1.1.1.1534.3	Winner
0	99	AVGFLSVPK			0.0006	916.539	2	11	1.1.1.1529.2	Winner
0	99	AVGFLSVPK			0.0007	916.539	2	12	1.1.1.1524.3	Winner
2	99	DEKEMDKENNDGSSEIGK		missed K-E@3; missed K-E@7	-0.0043	2023.86	3	21	1.1.1.937.4	Winner
0	99	DEKEMDKENNDGSSEIGK		missed K-E@3; missed K-E@7	-0.0043	2023.86	3	21	1.1.1.943.4	Winner
0	99	DLVKNEELEIQEK		missed K-N@4	-0.0015	1585.82	3	18	1.1.1.1398.5	Winner
0	99	DLVKNEELEIQEK		missed K-N@4	-0.0011	1585.82	3	19	1.1.1.1393.7	Winner
0	99	DLVKNEELEIQEK		missed K-N@4	-0.0011	1585.82	3	17	1.1.1.1403.7	Winner
0	99	DLVKNEELEIQEK		missed K-N@4	-0.0011	1585.82	3	10	1.1.1.1419.7	Winner
0	99	DLVKNEELEIQEK		missed K-N@4	-0.0011	1585.82	3	20	1.1.1.1388.6	Winner
0	99	DLVKNEELEIQEK		missed K-N@4	-0.0011	1585.82	3	18	1.1.1.1378.7	Winner
0	99	DLVKNEELEIQEK		missed K-N@4	-0.0011	1585.82	3	20	1.1.1.1383.9	Winner
0	99	DLVKNEELEIQEK		missed K-N@4	-0.0011	1585.82	3	15	1.1.1.1408.6	Winner
2	99	DLVKNEELEIQEK		missed K-N@4	-0.0015	1585.82	3	13	1.1.1.1413.6	Winner
0	99	DLVKNEELEIQEK		missed K-N@4	-0.0015	1585.82	3	19	1.1.1.1373.9	Winner
0	99	DLVKNEELEIQEK		missed K-N@4	-0.0015	1585.82	3	11	1.1.1.1424.12	Winner
2	99	DMGTDGKEELK		missed K-E@7	0.0006	1221.56	2	18	1.1.1.973.3	Winner
0	99	DMGTDGKEELK		missed K-E@7	0.0006	1221.56	2	15	1.1.1.979.5	Winner
0	99	DMGTDGKEELKADVVPVTLAPK		missed K-E@7; missed K-A@11	0.0017	2312.2	4	21	1.1.1.1536.4	Winner
0	99	DMGTDGKEELKADVVPVTLAPK		missed K-E@7; missed K-A@11	0.0017	2312.2	4	22	1.1.1.1551.5	Winner
0	99	DMGTDGKEELKADVVPVTLAPK		missed K-E@7; missed K-A@11	0.0017	2312.2	4	23	1.1.1.1541.4	Winner
0	99	DMGTDGKEELKADVVPVTLAPK		missed K-E@7; missed K-A@11	0.0017	2312.2	4	23	1.1.1.1546.3	Winner
0	99	DMGTDGKEELKADVVPVTLAPK		missed K-E@7; missed K-A@11	0.0012	2312.19	4	17	1.1.1.1561.5	Winner
0	99	DMGTDGKEELKADVVPVTLAPK		missed K-E@7; missed K-A@11	0.0012	2312.19	4	20	1.1.1.1556.6	Winner
2	99	DMGTDGKEELKADVVPVTLAPK		missed K-E@7; missed K-A@11	-0.0036	2312.19	4	14	1.1.1.1567.7	Winner
2	99	EELKADVVPVTLAPK		missed K-A@4	-0.0011	1607.91	3	14	1.1.1.1499.4	Winner
0	99	EELKADVVPVTLAPK		missed K-A@4	-0.0011	1607.91	3	12	1.1.1.1505.3	Winner
0	99	EIIDTANTTEMNSDHHSK			-0.0009	2041.9	4	16	1.1.1.1107.6	Winner
0	99	EIIDTANTTEMNSDHHSK			0.0027	2041.9	3	17	1.1.1.1095.10	Winner
0	99	EIIDTANTTEMNSDHHSK			-0.0009	2041.9	4	19	1.1.1.1101.5	Winner
2	99	EMDKENNDGSSEIGK		missed K-E@4	-0.0042	1651.7	3	15	1.1.1.899.5	Winner
0	99	EMDKENNDGSSEIGK		missed K-E@4	-0.0042	1651.7	3	14	1.1.1.909.7	Winner
0	99	EMDKENNDGSSEIGK		missed K-E@4	-0.0042	1651.7	3	15	1.1.1.904.5	Winner
0	99	EMDKENNDGSSEIGK		missed K-E@4	-0.0048	1651.69	3	14	1.1.1.894.4	Winner
0	99	EPSLESGVHSFEEGSELSK			-0.0022	2046.94	3	15	1.1.1.1566.5	Winner
2	99	EPSLESGVHSFEEGSELSK			-0.0027	2046.94	3	14	1.1.1.1571.5	Winner
0	99	EPSLESGVHSFEEGSELSK			0.0011	2046.94	3	16	1.1.1.1546.8	Winner
0	99	EPSLESGVHSFEEGSELSK			-0.002	2046.94	3	18	1.1.1.1561.10	Winner
0	99	EPSLESGVHSFEEGSELSK			0.0008	2046.94	3	14	1.1.1.1541.9	Winner
0	99	EPSLESGVHSFEEGSELSK			-0.002	2046.94	3	20	1.1.1.1556.10	Winner
0	99	EPSLESGVHSFEEGSELSK			-0.002	2046.94	3	17	1.1.1.1551.8	Winner
0	99	ESALNLPYHMPENK			-0.0011	1641.78	3	16	1.1.1.1483.4	Winner
0	99	ESALNLPYHMPENK			-0.0011	1641.78	3	15	1.1.1.1478.6	Winner
0	99	ESALNLPYHMPENK			-0.0011	1641.78	3	14	1.1.1.1488.5	Winner
0	99	ESALNLPYHMPENK			-0.0011	1641.78	3	14	1.1.1.1494.6	Winner
0	99	FTSQDASTPASSELNK			0.001	1681.78	2	18	1.1.1.1160.11	Winner
0	99	FTSQDASTPASSELNK			-0.0012	1681.78	2	29	1.1.1.1182.13	Winner
0	99	FTSQDASTPASSELNK			-0.0018	1681.78	2	17	1.1.1.1202.15	Winner
0	99	FTSQDASTPASSELNK			-0.0012	1681.78	2	28	1.1.1.1187.12	Winner
2	99	FTSQDASTPASSELNK			-0.0015	1681.78	2	18	1.1.1.1166.16	Winner
0	99	FTSQDASTPASSELNK			-0.0013	1681.78	2	23	1.1.1.1192.13	Winner
0	99	FTSQDASTPASSELNK			-0.0012	1681.78	2	29	1.1.1.1177.18	Winner
0	99	FTSQDASTPASSELNK			-0.0012	1681.78	2	23	1.1.1.1197.16	Winner
0	99	FTSQDASTPASSELNK			-0.0012	1681.78	2	27	1.1.1.1172.18	Winner
2	99	FTSQDASTPASSELNKQEK		missed K-Q@16	-0.001	2066.97	3	18	1.1.1.1161.11	Winner
0	99	FTSQDASTPASSELNKQEK		missed K-Q@16	-0.0001	2066.98	3	25	1.1.1.1139.15	Winner
0	99	FTSQDASTPASSELNKQEK		missed K-Q@16	-0.0005	2066.98	3	25	1.1.1.1149.21	Winner
0	99	FTSQDASTPASSELNKQEK		missed K-Q@16	-0.0005	2066.98	3	23	1.1.1.1155.15	Winner
0	99	FTSQDASTPASSELNKQEK		missed K-Q@16	-0.0005	2066.98	3	24	1.1.1.1144.12	Winner
0	99	FTSQDASTPASSELNKQEK		missed K-Q@16	-0.0009	2066.97	3	13	1.1.1.1134.11	Winner
0	99	GPSFMTSPSPK			-0.0001	1134.54	2	17	1.1.1.1240.7	Winner
0	99	GPSFMTSPSPK			-0.0017	1134.54	2	10	1.1.1.1258.15	Winner
0	99	GPSFMTSPSPK			-0.0001	1134.54	2	17	1.1.1.1252.9	Winner
0	99	GPSFMTSPSPK			-0.0001	1134.54	2	17	1.1.1.1246.9	Winner
0	99	GPSFMTSPSPK			-0.0017	1134.54	2	17	1.1.1.1234.7	Winner
2	99	GSEQTTGAENEVETNALPVVSK			-0.0044	2259.08	3	28	1.1.1.1450.6	Winner
0	99	GSEQTTGAENEVETNALPVVSK			-0.0043	2259.08	3	32	1.1.1.1455.11	Winner
0	99	GSEQTTGAENEVETNALPVVSK			-0.0043	2259.08	3	31	1.1.1.1471.10	Winner
0	99	GSEQTTGAENEVETNALPVVSK			-0.0043	2259.08	3	33	1.1.1.1460.8	Winner
0	99	GSEQTTGAENEVETNALPVVSK			-0.0043	2259.08	3	31	1.1.1.1466.13	Winner
0	99	GTSFFPTAGGFR			-0.0006	1243.6	2	19	1.1.1.1637.7	Winner
0	99	GTSFFPTAGGFR			-0.0006	1243.6	2	18	1.1.1.1632.7	Winner
0	99	GTSFFPTAGGFR			-0.0006	1243.6	2	20	1.1.1.1648.6	Winner
0	99	GTSFFPTAGGFR			-0.0006	1243.6	2	19	1.1.1.1642.5	Winner
0	99	GTSFFPTAGGFR			-0.0004	1243.6	2	12	1.1.1.1627.6	Winner
2	99	GTSFFPTAGGFR			-0.0009	1243.6	2	14	1.1.1.1659.8	Winner
0	99	GTSFFPTAGGFR			-0.0006	1243.6	2	19	1.1.1.1653.3	Winner
0	99	HLKTDDSTSGLTR		missed K-T@3	-0.0006	1429.72	3	13	1.1.1.910.2	Winner
2	99	HLKTDDSTSGLTR		missed K-T@3	-0.0006	1429.72	3	14	1.1.1.916.3	Winner
0	99	ITAEEEEEIGEDSQFMILAK			0.0014	2281.07	3	26	1.1.1.1906.3	Winner
0	99	ITAEEEEEIGEDSQFMILAK			0.0012	2281.07	3	28	1.1.1.1915.2	Winner
0	99	ITAEEEEEIGEDSQFMILAK			0.0023	2281.07	3	28	1.1.1.1936.2	Winner
0	99	ITAEEEEEIGEDSQFMILAK			0.0008	2281.07	3	32	1.1.1.1885.3	Winner
0	99	ITAEEEEEIGEDSQFMILAK			0.0008	2281.07	3	29	1.1.1.1900.5	Winner
2	99	ITAEEEEEIGEDSQFMILAK			0.0008	2281.07	3	25	1.1.1.1880.6	Winner
0	99	ITAEEEEEIGEDSQFMILAK			0.0008	2281.07	3	32	1.1.1.1890.5	Winner
0	99	ITAEEEEEIGEDSQFMILAK			0.0008	2281.07	3	27	1.1.1.1923.3	Winner
0	99	ITAEEEEEIGEDSQFMILAK			0.0008	2281.07	3	30	1.1.1.1895.5	Winner
0	99	ITAEEEEEIGEDSQFMILAK			0.0023	2281.07	3	24	1.1.1.1929.3	Winner
0	99	ITAEEEEEIGEDSQFMILAK			0.0041	2281.07	3	28	1.1.1.2518.2	Winner
0	99	KDLVKNEELEIQEK		missed K-D@1; missed K-N@5	-0.0007	1713.91	3	21	1.1.1.1231.9	Winner
2	99	KDLVKNEELEIQEK		missed K-D@1; missed K-N@5	-0.0009	1713.91	3	23	1.1.1.1222.7	Winner
0	99	KEPSLESGVHSFEEGSELSK		missed K-E@1	-0.0011	2175.03	4	27	1.1.1.1446.9	Winner
0	99	KEPSLESGVHSFEEGSELSK		missed K-E@1	-0.0011	2175.03	4	19	1.1.1.1461.7	Winner
0	99	KEPSLESGVHSFEEGSELSK		missed K-E@1	-0.0011	2175.03	4	24	1.1.1.1441.7	Winner
0	99	KEPSLESGVHSFEEGSELSK		missed K-E@1	-0.0011	2175.03	4	21	1.1.1.1456.4	Winner
0	99	KEPSLESGVHSFEEGSELSK		missed K-E@1	-0.0011	2175.03	4	23	1.1.1.1451.7	Winner
2	99	KEPSLESGVHSFEEGSELSK		missed K-E@1	-0.0016	2175.03	4	15	1.1.1.1469.3	Winner
0	99	KEPSLESGVHSFEEGSELSK		missed K-E@1	-0.0011	2175.03	4	21	1.1.1.1436.5	Winner
0	99	KKEPSLESGVHSFEEGSELSK		missed K-K@1; missed K-E@2	-0.0004	2303.13	4	25	1.1.1.1365.9	Winner
0	99	KKEPSLESGVHSFEEGSELSK		missed K-K@1; missed K-E@2	0.0001	2303.13	4	28	1.1.1.1348.9	Winner
2	99	KKEPSLESGVHSFEEGSELSK		missed K-K@1; missed K-E@2	-0.0015	2303.13	3	32	1.1.1.1352.11	Winner
0	99	KKEPSLESGVHSFEEGSELSK		missed K-K@1; missed K-E@2	-0.0004	2303.13	4	27	1.1.1.1359.10	Winner
0	99	KKEPSLESGVHSFEEGSELSK		missed K-K@1; missed K-E@2	-0.0004	2303.13	4	28	1.1.1.1353.10	Winner
0	99	KKEPSLESGVHSFEEGSELSK		missed K-K@1; missed K-E@2	-0.0015	2303.13	3	25	1.1.1.1350.10	Winner
0	99	KKEPSLESGVHSFEEGSELSK		missed K-K@1; missed K-E@2	-0.0007	2303.13	4	22	1.1.1.1376.8	Winner
0	99	KKEPSLESGVHSFEEGSELSK		missed K-K@1; missed K-E@2	-0.0002	2303.13	4	13	1.1.1.1381.9	Winner
0	99	KKEPSLESGVHSFEEGSELSK		missed K-K@1; missed K-E@2	-0.0044	2303.12	4	12	1.1.1.1396.8	Winner
0	99	KKEPSLESGVHSFEEGSELSK		missed K-K@1; missed K-E@2	-0.0044	2303.12	4	13	1.1.1.1411.8	Winner
0	99	KKEPSLESGVHSFEEGSELSK		missed K-K@1; missed K-E@2	-0.0002	2303.13	4	26	1.1.1.1371.10	Winner
0	99	KKEPSLESGVHSFEEGSELSK		missed K-K@1; missed K-E@2	-0.0007	2303.13	4	15	1.1.1.1386.9	Winner
0	99	LAALSDHN		cleaved N-P@C-term	0.0005	839.414	2	9	1.1.1.972.3	Winner
1.07	99	LAALSDHN		cleaved N-P@C-term	0.0006	839.414	2	9	1.1.1.977.3	Winner
0	99	LAALSDHNPSAPR			0.0024	1347.69	2	11	1.1.1.1110.17	Winner
0	99	LAALSDHNPSAPR			0.0008	1347.69	3	13	1.1.1.1121.6	Winner
0	99	LAALSDHNPSAPR			0.001	1347.69	3	18	1.1.1.1105.4	Winner
0	99	LAALSDHNPSAPR			0.0008	1347.69	3	12	1.1.1.1153.5	Winner
2	99	LAALSDHNPSAPR			0.0002	1347.69	2	20	1.1.1.1102.9	Winner
0	99	LAALSDHNPSAPR			0.001	1347.69	3	17	1.1.1.1099.4	Winner
0	99	LAALSDHNPSAPR			0.001	1347.69	3	18	1.1.1.1093.5	Winner
0	99	LAALSDHNPSAPR			0.001	1347.69	3	16	1.1.1.1116.6	Winner
0	99	LAALSDHNPSAPR			0.001	1347.69	3	16	1.1.1.1087.5	Winner
0	99	LAALSDHNPSAPR			0.001	1347.69	3	13	1.1.1.1082.4	Winner
0	99	LAALSDHNPSAPR			0.001	1347.69	3	16	1.1.1.1111.7	Winner
0	99	LGADEDSFVILEPETNR			0.0031	1903.92	2	19	1.1.1.1785.5	Winner
0	99	LGADEDSFVILEPETNR			0.0031	1903.92	2	23	1.1.1.1739.15	Winner
0	99	LGADEDSFVILEPETNR			0.0031	1903.92	2	24	1.1.1.1734.9	Winner
0	99	LGADEDSFVILEPETNR			0.0025	1903.92	2	20	1.1.1.1779.9	Winner
0	99	LGADEDSFVILEPETNR			0.0015	1903.92	2	19	1.1.1.1704.13	Winner
2	99	LGADEDSFVILEPETNR			0.0015	1903.92	2	18	1.1.1.1711.7	Winner
0	99	LGADEDSFVILEPETNR			0.0031	1903.92	2	22	1.1.1.1764.6	Winner
0	99	LGADEDSFVILEPETNR			0.0026	1903.92	2	22	1.1.1.1774.4	Winner
0	99	LGADEDSFVILEPETNR			0.0025	1903.92	2	22	1.1.1.1769.4	Winner
0	99	LGADEDSFVILEPETNR			0.0031	1903.92	2	24	1.1.1.1749.12	Winner
0	99	LGADEDSFVILEPETNR			0.0032	1903.92	2	24	1.1.1.1759.7	Winner
0	99	LGADEDSFVILEPETNR			0.0034	1903.92	2	19	1.1.1.1729.7	Winner
0	99	LGADEDSFVILEPETNR			0.0032	1903.92	2	22	1.1.1.1754.11	Winner
0	99	LGADEDSFVILEPETNR			0.0031	1903.92	2	23	1.1.1.1744.15	Winner
0	99	LGADEDSFVILEPETNRELEALK		missed R-E@17	0.0009	2587.3	3	29	1.1.1.1907.3	Winner
0	99	LGADEDSFVILEPETNRELEALK		missed R-E@17	0.0009	2587.3	3	32	1.1.1.1901.2	Winner
2	99	LGADEDSFVILEPETNRELEALK		missed R-E@17	0.0006	2587.3	3	24	1.1.1.1916.5	Winner
0	99	LGADEDSFVILEPETNRELEALK		missed R-E@17	0.0006	2587.3	3	27	1.1.1.1886.3	Winner
0	99	LGADEDSFVILEPETNRELEALK		missed R-E@17	0.0009	2587.3	3	32	1.1.1.1891.2	Winner
0	99	LGADEDSFVILEPETNRELEALK		missed R-E@17	0.0009	2587.3	3	31	1.1.1.1896.4	Winner
0	99	LGADEDSFVILEPETNRGEK		missed R-G@17	-0.004	2218.07	3	17	1.1.1.1622.9	Other
2	99	LGADEDSFVILEPETNRGEK		missed R-G@17	-0.004	2218.07	3	14	1.1.1.1628.10	Other
0	99	LSEPSLPIEDSQDLYNASPEPK			0.0013	2428.17	3	31	1.1.1.1712.9	Winner
0	99	LSEPSLPIEDSQDLYNASPEPK			0.0013	2428.17	3	33	1.1.1.1717.5	Winner
2	99	LSEPSLPIEDSQDLYNASPEPK			-0.0026	2428.16	3	21	1.1.1.1701.9	Winner
0	99	LSEPSLPIEDSQDLYNASPEPK			0.0011	2428.17	3	33	1.1.1.1707.11	Winner
0	99	LSEPSLPIEDSQDLYNASPEPK			0.0013	2428.17	3	31	1.1.1.1728.4	Winner
0	99	LSEPSLPIEDSQDLYNASPEPK			0.0013	2428.17	3	30	1.1.1.1722.5	Winner
0	99	LSEPSLPIEDSQDLYNASPEPK			0.0016	2428.17	3	28	1.1.1.1733.4	Winner
0	99	MGYFPTEEK			0.0006	1100.49	2	12	1.1.1.1351.13	Winner
0	99	MGYFPTEEK			-0.001	1100.48	2	13	1.1.1.1331.14	Winner
0	99	MGYFPTEEK			-0.001	1100.48	2	13	1.1.1.1336.15	Winner
0	99	MGYFPTEEK			-0.001	1100.48	2	13	1.1.1.1341.9	Winner
0	99	MGYFPTEEK			-0.0008	1100.48	2	9	1.1.1.1363.4	Winner
0	99	MGYFPTEEK			-0.001	1100.48	2	11	1.1.1.1326.12	Winner
0	99	MGYFPTEEKSETDENSGK		missed K-S@9	-0.0006	2047.87	3	18	1.1.1.1253.9	Winner
2	99	MGYFPTEEKSETDENSGK		missed K-S@9	-0.0006	2047.87	3	17	1.1.1.1265.13	Winner
0	99	MGYFPTEEKSETDENSGK		missed K-S@9	-0.0006	2047.87	3	18	1.1.1.1259.13	Winner
2	99	NASRPMVIQESK			0.0012	1358.7	3	17	1.1.1.1007.5	Winner
0	99	NASRPMVIQESK			0.0012	1358.7	3	15	1.1.1.1013.5	Winner
0	99	NASRPMVIQESK			0.0012	1358.7	3	14	1.1.1.1018.5	Winner
0	99	NASRPMVIQESK			-0.0011	1358.7	3	15	1.1.1.1001.4	Winner
0	99	NEELEIQEK			-0.0008	1130.54	2	14	1.1.1.1148.19	Winner
0	99	NEELEIQEK			-0.0008	1130.54	2	15	1.1.1.1138.12	Winner
0	99	NEELEIQEK			-0.0008	1130.54	2	15	1.1.1.1133.9	Winner
0	99	NEELEIQEK			-0.0005	1130.55	2	15	1.1.1.1123.10	Winner
0	99	NEELEIQEK			-0.0005	1130.55	2	15	1.1.1.1128.13	Winner
2	99	NEELEIQEK			-0.0011	1130.54	2	14	1.1.1.1154.15	Winner
0	99	NEELEIQEK			-0.0011	1130.54	2	12	1.1.1.1177.16	Winner
0	99	NEELEIQEK			-0.0011	1130.54	2	12	1.1.1.1172.16	Winner
0	99	NEELEIQEK			-0.0011	1130.54	2	11	1.1.1.1166.12	Winner
0	99	NEELEIQEK			-0.0008	1130.54	2	15	1.1.1.1143.19	Winner
0	99	NEELEIQEK			-0.0008	1130.54	2	10	1.1.1.1118.13	Winner
2	99	NFVFHTLSPVK			-0.0004	1287.7	2	16	1.1.1.1516.5	Winner
0	99	NFVFHTLSPVK			0	1287.7	2	11	1.1.1.1504.7	Winner
0	99	NIDDASQMDLFHR			-0.0017	1560.7	3	13	1.1.1.1507.4	Winner
2	99	NIDDASQMDLFHR			-0.0017	1560.7	3	15	1.1.1.1513.4	Winner
0	99	NIDDASQMDLFHR			-0.0008	1560.7	3	9	1.1.1.1524.7	Winner
0	99	NIDDASQMDLFHR			-0.0017	1560.7	3	13	1.1.1.1519.7	Winner
0	99	NPFEAIRPGSAQQVK			-0.0009	1640.86	3	14	1.1.1.1329.4	Winner
0	99	NPFEAIRPGSAQQVK			-0.0009	1640.86	3	14	1.1.1.1339.6	Winner
0	99	NPFEAIRPGSAQQVK			-0.0009	1640.86	3	14	1.1.1.1334.5	Winner
2	99	NPFEAIRPGSAQQVK			-0.0013	1640.86	3	15	1.1.1.1344.9	Winner
0	99	NQEDDVEQPFNDSG		cleaved G-C@C-term	0.0009	1592.62	2	10	1.1.1.1338.17	Winner
0	99	NQYQALKPR			-0.0008	1116.6	2	15	1.1.1.986.8	Winner
2	99	NQYQALKPR			-0.0008	1116.6	2	12	1.1.1.974.11	Winner
0	99	NQYQALKPR			-0.0008	1116.6	2	15	1.1.1.980.9	Winner
0	99	NQYQALKPR			-0.0008	1116.6	2	14	1.1.1.991.8	Winner
1.24	99	PFEAIRPGSAQQVK		cleaved N-P@N-term	0.0002	1526.82	3	13	1.1.1.1211.7	Winner
0	99	PMVIQESK		cleaved R-P@N-term	0.0002	930.485	2	12	1.1.1.1045.3	Winner
0	99	PMVIQESK		cleaved R-P@N-term	0.0002	930.485	2	13	1.1.1.1035.2	Winner
0	99	PMVIQESK		cleaved R-P@N-term	0.0002	930.485	2	13	1.1.1.1030.3	Winner
0	99	PMVIQESK		cleaved R-P@N-term	0.0002	930.485	2	13	1.1.1.1040.3	Winner
0	99	RGPSFMTSPSPK		missed R-G@1	-0.996	1289.64	3	11	1.1.1.1143.5	Winner
0	99	SLSSDSTLLLFK			0.0007	1309.71	2	21	1.1.1.1808.6	Winner
0	99	SLSSDSTLLLFK			0.0045	1309.72	2	13	1.1.1.1855.3	Winner
0	99	SLSSDSTLLLFK			0.0007	1309.71	2	17	1.1.1.1825.3	Winner
0	99	SLSSDSTLLLFK			0.0009	1309.71	2	19	1.1.1.1777.3	Winner
0	99	SLSSDSTLLLFK			0.0007	1309.71	2	21	1.1.1.1782.3	Winner
0	99	SLSSDSTLLLFK			-0.0011	1309.71	2	17	1.1.1.1830.3	Winner
0	99	SLSSDSTLLLFK			0.0003	1309.71	2	18	1.1.1.1818.2	Winner
0	99	SLSSDSTLLLFK			0.0003	1309.71	2	15	1.1.1.1767.4	Winner
2	99	SLSSDSTLLLFK			-0.0019	1309.71	2	17	1.1.1.1835.5	Winner
0	99	SLSSDSTLLLFK			-0.0017	1309.71	2	13	1.1.1.1847.5	Winner
0	99	SLSSDSTLLLFK			-0.0013	1309.71	2	16	1.1.1.1840.4	Winner
0	99	SLSSDSTLLLFK			0.0005	1309.71	2	21	1.1.1.1798.4	Winner
0	99	SLSSDSTLLLFK			0.0005	1309.71	2	18	1.1.1.1772.3	Winner
0	99	SLSSDSTLLLFK			0.0005	1309.71	2	20	1.1.1.1813.5	Winner
0	99	SLSSDSTLLLFK			0.0005	1309.71	2	21	1.1.1.1787.2	Winner
0	99	SLSSDSTLLLFK			0.0005	1309.71	2	20	1.1.1.1792.3	Winner
0	99	SLSSDSTLLLFK			0.0005	1309.71	2	21	1.1.1.1803.5	Winner
0	99	SLYQENLEAQVK		cleaved K-P@C-term	-0.004	1420.72	2	16	1.1.1.1378.14	Winner
0	99	SLYQENLEAQVK		cleaved K-P@C-term	-0.004	1420.72	2	20	1.1.1.1383.17	Winner
2	99	SLYQENLEAQVK		cleaved K-P@C-term	-0.004	1420.72	2	20	1.1.1.1388.13	Winner
0	99	SLYQENLEAQVK		cleaved K-P@C-term	-0.004	1420.72	2	17	1.1.1.1393.14	Winner
0	99	SLYQENLEAQVKP		cleaved P-C@C-term	-0.0025	1517.77	2	18	1.1.1.1468.11	Winner
0	99	SSAVGPPEK			0.0001	870.445	2	14	1.1.1.877.2	Winner
0	99	SSAVGPPEK			0.0001	870.445	2	13	1.1.1.882.2	Winner
0	99	SSAVGPPEK			0.0001	870.445	2	14	1.1.1.871.2	Winner
0	99	SSAVGPPEK			-0.0019	870.443	2	10	1.1.1.897.2	Winner
0	99	SSAVGPPEK			0.0001	870.445	2	12	1.1.1.887.2	Winner
0	99	SSAVGPPEK			0.0001	870.445	2	14	1.1.1.866.2	Winner
0	99	STDFTTDR		cleaved N-S@N-term	-0.0006	941.408	2	11	1.1.1.972.6	Winner
1.25	99	STDFTTDR		cleaved N-S@N-term	-0.0006	941.408	2	11	1.1.1.967.5	Winner
0	99	TDDSTSGLTR			-0.0013	1051.48	2	13	1.1.1.928.5	Winner
0	99	TDDSTSGLTR			-0.0025	1051.48	2	14	1.1.1.945.3	Winner
0	99	TDDSTSGLTR			-0.0025	1051.48	2	13	1.1.1.940.4	Winner
0	99	TDDSTSGLTR			-0.0011	1051.48	2	16	1.1.1.918.3	Winner
0	99	TDDSTSGLTR			-0.0011	1051.48	2	14	1.1.1.902.4	Winner
0	99	TDDSTSGLTR			-0.0011	1051.48	2	16	1.1.1.913.4	Winner
0	99	TDDSTSGLTR			-0.0011	1051.48	2	14	1.1.1.923.6	Winner
2	99	TDDSTSGLTR			-0.0011	1051.48	2	17	1.1.1.907.4	Winner
0	99	TGSLLNQPK			0.0008	956.53	2	13	1.1.1.1074.6	Winner
2	99	TGSLLNQPK			0.0008	956.53	2	14	1.1.1.1057.5	Winner
0	99	TGSLLNQPK			0.0006	956.53	2	12	1.1.1.1079.8	Winner
0	99	TGSLLNQPK			0.0008	956.53	2	13	1.1.1.1069.8	Winner
0	99	TGSLLNQPK			0.0008	956.53	2	14	1.1.1.1063.5	Winner
0	99	TGSLLNQPK			0.001	956.53	2	11	1.1.1.1041.8	Winner
0	99	TGSLLNQPK			0.0008	956.53	2	14	1.1.1.1051.8	Winner
0	99	TIHDFFK			0.0019	906.462	2	11	1.1.1.1296.6	Winner
2	99	TIHDFFK			0.0013	906.461	2	11	1.1.1.1290.6	Winner
0	99	TIHDFFK			0.0015	906.462	2	11	1.1.1.1321.8	Winner
0	99	TLFLGAGDFQF		cleaved F-C@C-term	0.0004	1214.6	2	13	1.1.1.2266.3	Winner
2	99	TLFLGAGDFQF		cleaved F-C@C-term	0.0003	1214.6	2	14	1.1.1.2260.2	Winner
2	99	TMLDDDKR		missed K-R@7	-0.001	992.459	2	13	1.1.1.898.3	Winner
2	99	TTYDSAEEENKENLYAGK		missed K-E@11	-0.0032	2060.91	3	15	1.1.1.1181.14	Winner
0	99	TVADSDESYMEK			0.0013	1373.57	2	21	1.1.1.1121.9	Winner
0	99	TVADSDESYMEK			0.0013	1373.57	2	21	1.1.1.1126.13	Winner
0	99	TVADSDESYMEK			0.0013	1373.57	2	20	1.1.1.1116.13	Winner
0	99	TVADSDESYMEK			-0.0012	1373.56	2	10	1.1.1.1146.13	Winner
0	99	TVADSDESYMEK			0.0011	1373.57	2	12	1.1.1.1141.11	Winner
2	99	TVADSDESYMEK			0.0013	1373.57	2	20	1.1.1.1131.9	Winner
0	99	TVADSDESYMEK			0.0013	1373.57	2	17	1.1.1.1136.10	Winner
0	99	TVADSDESYMEK			0.0017	1373.57	2	13	1.1.1.1111.13	Winner
2	99	VKNEELEIQEK		cleaved L-V@N-term; missed K-N@2	-0.0021	1357.71	2	12	1.1.1.1381.13	Winner
0	99	YLADGDLHSDGPGR			0.0003	1471.67	3	18	1.1.1.1148.12	Winner
0	99	YLADGDLHSDGPGR			0.0003	1471.67	3	18	1.1.1.1143.13	Winner
0	99	YLADGDLHSDGPGR			0.0003	1471.67	3	15	1.1.1.1166.8	Winner
2	99	YLADGDLHSDGPGR			0.0003	1471.67	3	18	1.1.1.1160.6	Winner
0	99	YLADGDLHSDGPGR			0.0003	1471.67	3	11	1.1.1.1123.5	Winner
0	99	YLADGDLHSDGPGR			0.0003	1471.67	3	18	1.1.1.1154.8	Winner
0	99	YLADGDLHSDGPGR			0.0003	1471.67	3	14	1.1.1.1138.7	Winner
0	99	YLADGDLHSDGPGR			-0.0018	1471.67	3	14	1.1.1.1172.10	Winner
0	99	YLADGDLHSDGPGR			-0.0013	1471.67	3	13	1.1.1.1192.8	Winner
0	99	YLADGDLHSDGPGR			-0.0016	1471.67	3	16	1.1.1.1133.7	Winner
0	99	YLADGDLHSDGPGR			-0.0016	1471.67	3	14	1.1.1.1128.7	Winner
0	98.8	EIIDTANTTEMNSDHHSK			-0.0004	2041.9	4	13	1.1.1.1113.6	Winner
0	98.8	FTSQDASTPASSELNK			0.0013	1681.78	2	10	1.1.1.1215.13	Winner
0	98.8	PMVIQESK		cleaved R-P@N-term	0.0001	930.485	2	12	1.1.1.1050.4	Winner
0	98.8	SPSPGLFR			-0.0001	859.455	2	12	1.1.1.1246.3	Winner
0	98.8	SSAVGPPEK			-0.0001	870.445	2	10	1.1.1.902.2	Winner
0	98.8	TDDSTSGLTR			-0.0025	1051.48	2	12	1.1.1.934.4	Winner
0	98.8	TIHDFFK			0.0015	906.462	2	11	1.1.1.1326.4	Winner
0	98.7	ASLVSSASK			-0.0005	848.46	2	10	1.1.1.924.4	Winner
0	98.7	DEKEMDKENNDGSSEIGK		missed K-E@3; missed K-E@7	0.0001	2023.86	4	12	1.1.1.948.5	Winner
0	98.7	LAALSDHN		cleaved N-P@C-term	0.0006	839.414	2	8	1.1.1.983.3	Winner
0	98.7	RGPSFMTSPSPK		missed R-G@1	-0.996	1289.64	3	10	1.1.1.1148.4	Winner
0	98.7	SPSPGLFR			-0.0001	859.455	2	12	1.1.1.1252.2	Winner
0	98.7	SPSPGLFR			0.0001	859.455	2	11	1.1.1.1264.2	Winner
0	98.7	SSAVGPPEK			-0.0003	870.444	2	11	1.1.1.858.2	Winner
0	98.7	TDDSTSGLTR			-0.0009	1051.48	2	12	1.1.1.950.3	Winner
0.31	98.6	ETQIITGSDES		cleaved S-C@C-term	-0.0005	1178.53	2	11	1.1.1.1143.20	Winner
0	98.6	KKEPSLESGVHSFEEGSELSK		missed K-K@1; missed K-E@2	-0.0039	2303.12	4	12	1.1.1.1391.8	Winner
0	98.6	MGYFPTEEK			-0.001	1100.48	2	12	1.1.1.1346.9	Winner
0	98.6	TGSLLNQPK			0.001	956.53	2	12	1.1.1.1046.6	Winner
0	98.5	PMVIQESK		cleaved R-P@N-term	-0.0005	930.484	2	11	1.1.1.1056.3	Winner
0	98.5	VKNEELEIQEK		cleaved L-V@N-term; missed K-N@2	-0.0021	1357.71	2	9	1.1.1.1386.14	Winner
0	98.4	TMLDDDKR		missed K-R@7	-0.001	992.459	2	11	1.1.1.903.4	Winner
0	98.3	ASLVSSASK			-0.0007	848.46	2	9	1.1.1.929.2	Winner
0	98.3	QLGVDVSIKPR			0.0015	1210.7	3	11	1.1.1.1315.2	Winner
0	98.3	SPSPGLFR			-0.0001	859.455	2	12	1.1.1.1248.3	Winner
0	98.1	LAALSDHNPSAPR			0.0004	1347.69	3	12	1.1.1.1131.4	Winner
0	98.1	TIHDFFK			0.0019	906.462	2	11	1.1.1.1316.7	Winner
0	98	GTSFFPTAGGFR			-0.0013	1243.6	2	11	1.1.1.1664.8	Winner
0	98	TIHDFFK			0.0015	906.462	2	10	1.1.1.1331.7	Winner
0	97.9	SSAVGPPEK			0.0001	870.445	2	11	1.1.1.892.2	Winner
0	97.9	YLADGDLHSDGPGR			-0.0018	1471.67	3	11	1.1.1.1182.9	Winner
0	97.8	RGPSFMTSPSPK		missed R-G@1	-0.0006	1290.64	2	9	1.1.1.1149.20	Winner
0	97.8	TGSLLNQPK			0.0008	956.53	2	10	1.1.1.1084.9	Winner
0	97.7	LAALSDHNPSAPR			-0.0032	1347.69	3	8	1.1.1.1183.6	Winner
0	97.7	SPSPGLFR			-0.0001	859.455	2	11	1.1.1.1258.3	Winner
0.23	97.5	IHDFFK		cleaved T-I@N-term	0.0004	805.413	2	9	1.1.1.1304.2	Winner
0	97.5	TIHDFFK			0.0019	906.462	2	11	1.1.1.1306.5	Winner
0	97.3	NEELEIQEK			-0.0011	1130.54	2	11	1.1.1.1160.8	Winner
0	97.3	YLADGDLHSDGPGR			-0.0018	1471.67	3	12	1.1.1.1187.10	Winner
0	97.2	MGYFPTEEK			-0.001	1100.48	2	11	1.1.1.1334.6	Winner
0	97.1	MGYFPTEEK			-0.001	1100.48	2	11	1.1.1.1329.5	Winner
0	97.1	NPFEAIRPGSAQQVK			-0.0004	1640.86	3	12	1.1.1.1324.8	Winner
0	97.1	TIHDFFK			0.0019	906.462	2	11	1.1.1.1301.5	Winner
0	97.1	TIHDFFK			-0.0003	906.46	2	9	1.1.1.1336.6	Winner
0	97	GTSFFPTAGGFR			-0.001	1243.6	2	11	1.1.1.1669.7	Winner
0	96.6	LAALSDHNPSAPR			0.0062	1347.7	3	10	1.1.1.1261.4	Winner
0	96.6	YLADGDLHSDGPGR			-0.0022	1471.67	3	9	1.1.1.1202.9	Winner
0	95.8	SPSPGLFR			-0.0004	859.455	2	10	1.1.1.1276.3	Winner
0	95.8	SPSPGLFR			-0.0001	859.455	2	10	1.1.1.1234.4	Winner
0	95.8	TIHDFFK			0.0019	906.462	2	11	1.1.1.1311.5	Winner
0	95.5	KKEPSLESGVHSFEEGSELSK		missed K-K@1; missed K-E@2	0.0026	2303.13	4	12	1.1.1.1308.9	Winner
0	95.3	DMGTDGKEELK		missed K-E@7	-0.0002	1221.55	3	11	1.1.1.974.3	Winner
0.28	95.3	EAIRPGSAQQVK		cleaved F-E@N-term	-0.0016	1282.7	3	11	1.1.1.922.3	Winner
0	95.3	NQYQALKPR			-0.0005	1116.6	2	11	1.1.1.996.5	Winner
0	95.3	YLADGDLHSDGPGR			-0.0022	1471.67	3	11	1.1.1.1177.11	Winner
0	95.1	LAALSDHNPSAPR			-0.0044	1347.69	3	7	1.1.1.1173.5	Winner
0	95	SPSPGLFR			-0.0001	859.455	2	11	1.1.1.1240.3	Winner
0	94.6	KDLVKNEELEIQEK		missed K-D@1; missed K-N@5	-0.004	1713.91	3	11	1.1.1.1215.10	Winner
0	94.6	SPSPGLFR			0.0001	859.455	2	10	1.1.1.1270.2	Winner
0	94.6	TGSLLNQPK			0.0008	956.53	2	9	1.1.1.1089.7	Winner
0	94.5	LAALSDHNPSAPR			-0.0074	1347.68	3	10	1.1.1.1168.5	Winner
0	94.4	DMGTDGKEELK		missed K-E@7	0.0006	1221.56	2	11	1.1.1.968.3	Winner
0.39	93.8	SDHNPSAPR		cleaved L-S@N-term	0.0005	979.448	2	8	1.1.1.1097.5	Winner
0	93.7	QLGVDVSIKPR			0.0015	1210.7	3	10	1.1.1.1310.2	Winner
0	93.4	ASRPMVIQESK		cleaved N-A@N-term	0.0014	1244.66	3	7	1.1.1.992.3	Winner
0	93.3	SPSPGLFR			0.0007	859.456	2	9	1.1.1.1284.2	Winner
0.11	93	ASTPASSELNK		cleaved D-A@N-term	0	1103.55	2	7	1.1.1.944.9	Winner
0	91.5	LAALSDHN		cleaved N-P@C-term	0.0006	839.414	2	8	1.1.1.988.3	Winner
0	90.4	RGPSFMTSPSPK		missed R-G@1	-0.0006	1290.64	2	8	1.1.1.1144.11	Winner
0	90.2	TMLDDDKR		missed K-R@7	-0.001	992.459	2	9	1.1.1.908.4	Winner
0	89.5	YLADGDLHSDGPGR			-0.0001	1471.67	3	11	1.1.1.1167.6	Winner
0	85.7	QLGVDVSIKPR			0.0015	1210.7	3	8	1.1.1.1330.3	Winner
0.14	85.4	FEAIRPGSAQQVK		cleaved P-F@N-term	-0.0007	1429.77	3	10	1.1.1.1145.4	Winner
0.05	85	NPFEAIRPG		cleaved G-S@C-term	-0.0034	999.51	2	7	1.1.1.1390.6	Winner
0	84.6	IHDFFK		cleaved T-I@N-term	0.0004	805.413	2	7	1.1.1.1294.2	Winner
0	81.2	KKEPSLESGVHSFEEGSELSK		missed K-K@1; missed K-E@2	0.0026	2303.13	4	11	1.1.1.1303.12	Winner
0	80.9	LAALSDHNPSAPR			-0.0004	1347.69	3	7	1.1.1.1189.6	Winner
0	80.9	PMVIQESK		cleaved R-P@N-term	0.0002	930.485	2	9	1.1.1.1025.3	Winner
0	80.9	TMLDDDKR		missed K-R@7	-0.001	992.459	2	7	1.1.1.914.5	Winner
0	80.7	ETQIITGSDES		cleaved S-C@C-term	0.0099	1178.54	2	9	1.1.1.1133.10	Winner
0	78	ESALNLPYHMPENK			-0.0007	1641.78	3	11	1.1.1.1500.7	Winner
0.03	74.9	YQALKPR		cleaved Q-Y@N-term	0	874.503	2	8	1.1.1.990.4	Winner
0	72.3	QLGVDVSIKPR			0.0015	1210.7	3	9	1.1.1.1325.2	Winner
0	72	QLGVDVSIKPR			0.0015	1210.7	3	9	1.1.1.1320.2	Winner
0	70.6	ADVVPVTLAPK			0.0004	1108.65	2	9	1.1.1.1410.3	Winner
0	69.4	QLGVDVSIKPR			0.0006	1210.7	3	7	1.1.1.1335.2	Winner
0.02	69.4	QYQALKPR		cleaved N-Q@N-term	-0.0002	1002.56	2	7	1.1.1.982.6	Winner
0	69.1	NFVFHTLSPVK			-0.0005	1287.7	3	11	1.1.1.1510.2	Winner
0	68.7	MGYFPTEEK			-0.001	1100.48	2	7	1.1.1.1356.8	Winner
0	67.9	TMLDDDKR		missed K-R@7	-0.001	992.459	2	9	1.1.1.893.2	Winner
0	67.8	EELKADVVPVTLAPK		missed K-A@4	-0.0011	1607.91	3	11	1.1.1.1493.3	Winner
0	67.8	NIDDASQMDLFHR			-0.0017	1560.7	3	11	1.1.1.1501.6	Winner
0	66.6	KKEPSLESGVHSFEEGSELSK		missed K-K@1; missed K-E@2	-0.0044	2303.12	4	10	1.1.1.1417.11	Winner
0	64.8	EAIRPGSAQQVK		cleaved F-E@N-term	-0.0016	1282.7	3	10	1.1.1.917.3	Winner
0.44	63.9	RFTLDR		missed R-F@1	0.0001	806.44	2	8	1.1.1.1051.2	Winner
0	62.3	KKEPSLESGVHSFEEGSELSK		missed K-K@1; missed K-E@2	-0.0046	2303.12	4	11	1.1.1.1406.5	Winner
0	61.8	KKEPSLESGVHSFEEGSELSK		missed K-K@1; missed K-E@2	-0.0031	2303.12	4	11	1.1.1.1401.12	Winner
0	60.3	AGQTVNVNVIVK			-0.0033	1240.71	2	10	1.1.1.1431.8	Winner
0	60.3	AVGFLSVPK			0.0006	916.539	2	6	1.1.1.1488.2	Winner
0	59.9	SPSPGLFR			0.0007	859.456	2	7	1.1.1.1290.3	Winner
0	58.7	KEPSLESGVHSFEEGSELSK		missed K-E@1	-0.0055	2175.03	3	10	1.1.1.1465.9	Winner
0	58.1	SRPMVIQESK		cleaved A-S@N-term	-0.0011	1173.62	2	8	1.1.1.1007.7	Winner
0	58.1	YQALKPR		cleaved Q-Y@N-term	0	874.503	2	8	1.1.1.985.3	Winner
0	54	QLGVDVSIKPR			0.0015	1210.7	3	7	1.1.1.1324.2	Winner
0	50.9	PFEAIRPGSAQQVK		cleaved N-P@N-term	0.0002	1526.82	3	8	1.1.1.1206.8	Winner
0	50.2	PMVIQESK		cleaved R-P@N-term	-0.0023	930.482	2	7	1.1.1.1062.4	Winner
0	49.9	AVGFLSVPK			0.0006	916.539	2	7	1.1.1.1549.3	Winner
0	49.6	TIHDFFK			-0.0003	906.46	2	6	1.1.1.1341.5	Winner
0	48.6	ESALNLPYHMPENK			-0.0011	1641.78	3	9	1.1.1.1473.7	Winner
0	48.3	ADVVPVTLAPK			-0.002	1108.65	2	9	1.1.1.1450.3	Winner
0	48.3	NFVFHTLSPVK			-0.0005	1287.7	3	8	1.1.1.1522.2	Winner
0	47.7	KKEPSLESGVHSFEEGSELSK		missed K-K@1; missed K-E@2	0.0026	2303.13	4	10	1.1.1.1298.8	Winner
0	47.2	FEAIRPGSAQQVK		cleaved P-F@N-term	-0.0007	1429.77	3	8	1.1.1.1140.4	Winner
0	46.6	NPFEAIRPG		cleaved G-S@C-term	-0.0034	999.51	2	7	1.1.1.1395.5	Winner
0	45.1	AVGFLSVPK			0.0017	916.54	2	7	1.1.1.1559.3	Winner
0	45.1	KKEPSLESGVHSFEEGSELSK		missed K-K@1; missed K-E@2	-0.0039	2303.12	4	9	1.1.1.1438.8	Winner
0	44.8	GPSFMTSPSPK			-0.0003	1134.54	2	8	1.1.1.1265.9	Winner
0	44.8	YLADGDLHSDGPGR			-0.0018	1471.67	3	7	1.1.1.1197.11	Winner
0	43.1	KKEPSLESGVHSFEEGSELSK		missed K-K@1; missed K-E@2	0.0004	2303.13	4	10	1.1.1.1343.14	Winner
0	40.7	EIIDTANTTEMNSDHHSK			-0.0009	2041.9	4	9	1.1.1.1109.10	Winner
0	40.7	QLGVDVSIKPR			-0.003	1210.7	3	7	1.1.1.1350.2	Winner
0	37.8	AVGFLSVPK			0.0023	916.54	2	6	1.1.1.1564.3	Winner
0.13	37.6	NPFEAIR		cleaved R-P@C-term	0.0016	845.441	2	7	1.1.1.1300.4	Winner
0	36.1	ESLESIR		cleaved E-E@N-term	-0.014	832.415	2	7	1.1.1.1102.3	Winner
0	35.9	NPFEAIR		cleaved R-P@C-term	0.0014	845.441	2	7	1.1.1.1295.4	Winner
0	33.7	NQYQALKPR			-0.001	1116.6	2	8	1.1.1.1002.2	Winner
0	32.8	ADVVPVTLAPK			0.0006	1108.65	2	7	1.1.1.1520.4	Winner
0	32.5	ASTPASSELNK		cleaved D-A@N-term	0	1103.55	2	7	1.1.1.939.9	Winner
0	31.9	MGYFPTEEK			-0.0008	1100.48	2	6	1.1.1.1321.15	Winner
0	31.7	NPFEAIRPG		cleaved G-S@C-term	-0.0034	999.51	2	5	1.1.1.1384.7	Winner
0	30.2	QLGVDVSIKPR			-0.0012	1210.7	3	6	1.1.1.1340.2	Winner
0	28.2	AVGFLSVPK			0.0028	916.541	2	6	1.1.1.1594.2	Winner
0	27.9	SPSPGLFR			0.0004	859.456	2	7	1.1.1.1297.3	Winner
0	27.4	DMGTDGKEELK		missed K-E@7	-0.0002	1221.55	3	8	1.1.1.985.2	Winner
0	27.4	VKNEELEIQEK		cleaved L-V@N-term; missed K-N@2	-0.0021	1357.71	2	6	1.1.1.1391.13	Winner
0	27.1	QLGVDVSIKPR			0.0015	1210.7	3	6	1.1.1.1305.2	Winner
0	26.1	RFTLDR		missed R-F@1	0.0015	806.442	2	8	1.1.1.1036.2	Winner
0	26.1	STDFTTDR		cleaved N-S@N-term	-0.0008	941.408	2	8	1.1.1.962.4	Winner
0	25.7	RFTLDR		missed R-F@1	0.0015	806.442	2	8	1.1.1.1041.2	Winner
0	25.5	AVGFLSVPK			-0.0005	916.538	2	7	1.1.1.1569.3	Winner
0	25.2	RFTLDR		missed R-F@1	0.0015	806.442	2	8	1.1.1.1046.2	Winner
0	24.3	QLGVDVSIKPR			0.0015	1210.7	3	7	1.1.1.1319.2	Winner
0	23.2	NPFEAIR		cleaved R-P@C-term	0.0016	845.441	2	7	1.1.1.1310.3	Winner
0	22.1	RFTLDR		missed R-F@1	0.0015	806.442	2	7	1.1.1.1031.2	Winner
0	21.7	NASRPMVIQESK			0.0012	1358.7	3	8	1.1.1.1023.5	Winner
0	21.3	RFTLDR		missed R-F@1	-0.0001	806.44	2	6	1.1.1.1026.2	Winner
0	20.5	QLGVDVSIKPR			-0.0015	1210.7	3	6	1.1.1.1345.2	Winner
0	19.5	AVGFLSVPK			0.0021	916.54	2	6	1.1.1.1554.3	Winner
0	18.9	ESALNLPYHMPENK			-0.0014	1641.78	3	8	1.1.1.1506.4	Winner
0	18.4	NPFEAIR		cleaved R-P@C-term	0.0016	845.441	2	6	1.1.1.1315.3	Winner
0	18.3	NPFEAIRPGSAQQVK			-0.0009	1640.86	3	8	1.1.1.1349.9	Winner
0	18.2	RFTLDR		missed R-F@1	0.0001	806.44	2	5	1.1.1.1057.2	Winner
0	17.9	NPFEAIR		cleaved R-P@C-term	0.0016	845.441	2	6	1.1.1.1309.3	Winner
0	17.6	FTSQDASTPASSELNK			-0.0027	1681.78	3	8	1.1.1.1191.7	Winner
0	17.6	NPFEAIR		cleaved R-P@C-term	0.0016	845.441	2	6	1.1.1.1305.5	Winner
0	17.2	RGPSFMTSPSPK		missed R-G@1	-0.001	1290.64	2	5	1.1.1.1155.14	Winner
0	14.1	YLADGDLHSD		cleaved D-G@C-term	0.0005	1104.47	2	7	1.1.1.1161.10	Winner
0	6.9	ALSDHNPSAPR		cleaved A-A@N-term	0.0019	1163.57	2	6	1.1.1.1086.13	Winner

## Sheet: HU
Contrib	Conf	Sequence	Modifications	Cleavages	∆Mass	Prec MW	z	Sc	Spectrum	Type
0	19.9	MGYFPTEEK	Acetyl@N-term		-0.0012	1142.49	2	9	1.1.1.1286.14	Winner
0	99	NQEDDVEQPFNDSG	Amidated@C-term	cleaved G-C@C-term	-0.0015	1591.64	2	17	1.1.1.1245.20	Winner
0.08	99	NQEDDVEQPFNDSG	Amidated@C-term	cleaved G-C@C-term	-0.0025	1591.64	2	13	1.1.1.1250.21	Winner
0	99	NQEDDVEQPFNDSG	Amidated@C-term	cleaved G-C@C-term	-0.0015	1591.64	2	15	1.1.1.1240.17	Winner
0	99	SLYQENLEAQVKP	Amidated@C-term	cleaved P-C@C-term	-0.0014	1516.79	2	18	1.1.1.1345.16	Winner
0.06	99	SLYQENLEAQVKP	Amidated@C-term	cleaved P-C@C-term	-0.0014	1516.79	2	18	1.1.1.1350.17	Winner
0	99	SLYQENLEAQVKP	Amidated@C-term	cleaved P-C@C-term	-0.0014	1516.79	2	14	1.1.1.1340.19	Winner
0	99	NQEDDVEQPFNDSGCLLVDK	Carboxy(D)@12; Dioxidation(C)@15		0.0225	2339.99	3	15	1.1.1.1663.6	Winner
0	99	SETDENSGKQPSKLDEDDSCSLLTK	Carboxy(D)@18; Dioxidation(C)@20	missed K-Q@9; missed K-L@13	0.0183	2801.22	4	14	1.1.1.1291.13	Winner
0	99	SETDENSGKQPSKLDEDDSCSLLTK	Carboxy(D)@18; Dioxidation(C)@20	missed K-Q@9; missed K-L@13	0.0183	2801.22	4	15	1.1.1.1286.16	Winner
0	99	LDEDDSCSLLTK	Carboxy(D)@5; Dioxidation(C)@7		0.0189	1413.6	2	12	1.1.1.1395.17	Winner
0	96	LDEDDSCSLLTK	Carboxy(D)@5; Dioxidation(C)@7		0.0189	1413.6	2	13	1.1.1.1400.12	Winner
0	96	LDEDDSCSLLTK	Carboxy(D)@5; Dioxidation(C)@7		0.0189	1413.6	2	10	1.1.1.1390.16	Winner
0	99	ETQIITGSDESCR	Carboxy(E)@10; Dioxidation(C)@12		0.0212	1513.64	2	15	1.1.1.1138.17	Winner
0	65.4	LSEPSLPIEDSQDLYNASPEPK	Carboxy(E)@9		-0.023	2472.13	3	10	1.1.1.1652.15	Winner
0	94.9	LSEPSLPIEDSQDLYNASPEPK	Cation:K(D)@13		-0.0094	2466.11	4	11	1.1.1.1658.6	Winner
0	99	GSEQTTGAENEVETNALPVVSK	Cation:K(E)@11		-0.0046	2297.04	3	15	1.1.1.1404.14	Winner
0	99	GSEQTTGAENEVETNALPVVSK	Cation:K(E)@11		-0.0046	2297.04	3	19	1.1.1.1403.19	Winner
0	99	GSEQTTGAENEVETNALPVVSK	Cation:K(E)@11		-0.0046	2297.04	3	15	1.1.1.1405.16	Winner
0	98	GSEQTTGAENEVETNALPVVSK	Cation:K(E)@11		-0.0046	2297.04	3	13	1.1.1.1401.12	Winner
0	75.1	GSEQTTGAENEVETNALPVVSK	Cation:K(E)@11		-0.006	2297.04	4	11	1.1.1.1400.5	Winner
0	94.2	ITAEEEEEIGEDSQFMILAK	Cation:K(E)@11; Oxidation(D)@12; Oxidation(M)@16		-0.0313	2350.98	4	14	1.1.1.1690.8	Winner
0	80.3	ITAEEEEEIGEDSQFMILAK	Cation:K(E)@11; Oxidation(D)@12; Oxidation(M)@16		-0.0294	2350.98	4	13	1.1.1.1711.6	Winner
0	32.6	LGADEDSFVILEPETNR	Cation:K(E)@5		-0.0081	1941.86	3	10	1.1.1.1676.6	Winner
0	99	GSEQTTGAENEVETNALPVVSK	Cation:K(E)@9		-0.0046	2297.04	3	13	1.1.1.1402.19	Winner
0	20.9	GSEQTTGAENEVETNALPVVSK	Cation:K(E)@9		-0.0104	2297.03	4	9	1.1.1.1395.7	Winner
0	92.6	GSEQTTGAENEVETNALPVVSK	Cation:K(E)@9; Oxidation(N)@10		-0.0556	2312.98	3	14	1.1.1.1353.13	Winner
0	99	LSEPSLPIEDSQDLYNASPEPK	Cation:Na(D)@13		-0.0029	2450.14	3	20	1.1.1.1658.13	Winner
0	99	LSEPSLPIEDSQDLYNASPEPK	Cation:Na(D)@13		-0.0029	2450.14	3	20	1.1.1.1663.7	Winner
0	97.5	SLSSDSTLLLFK	Cation:Na(D)@5		0.0014	1331.7	2	13	1.1.1.1735.6	Winner
0	94.2	SLSSDSTLLLFK	Cation:Na(D)@5		0.0014	1331.7	2	12	1.1.1.1730.7	Winner
0	87.9	SLSSDSTLLLFK	Cation:Na(D)@5		0.0019	1331.7	2	10	1.1.1.1746.8	Winner
0	75.1	SLSSDSTLLLFK	Cation:Na(D)@5		0.0013	1331.7	2	10	1.1.1.1741.8	Winner
0	99	LAALSDHNPSAPR	Cation:Na(D)@6		-0.0007	1369.67	3	15	1.1.1.1027.4	Winner
0	99	LGADEDSFVILEPETNR	Cation:Na(D)@6		0.0002	1925.9	3	25	1.1.1.1686.4	Winner
0	99	LGADEDSFVILEPETNR	Cation:Na(D)@6		0.0002	1925.9	3	24	1.1.1.1691.5	Winner
0	99	LGADEDSFVILEPETNR	Cation:Na(D)@6		0.0002	1925.9	3	22	1.1.1.1681.5	Winner
0	99	LGADEDSFVILEPETNR	Cation:Na(D)@6		0.0003	1925.9	3	21	1.1.1.1701.3	Winner
0	99	LGADEDSFVILEPETNR	Cation:Na(D)@6		0.0003	1925.9	3	18	1.1.1.1671.5	Winner
0	99	GSEQTTGAENEVETNALPVVSK	Cation:Na(E)@11; Deamidated(N)@15		-0.0011	2282.05	3	18	1.1.1.1357.11	Winner
0	99	ITAEEEEEIGEDSQFMILAK	Cation:Na(E)@11; Oxidation(M)@16		0.0004	2319.04	3	24	1.1.1.2580.2	Winner
0	99	LGADEDSFVILEPETNR	Cation:Na(E)@5		0.0002	1925.9	3	23	1.1.1.1676.5	Winner
0	99	LGADEDSFVILEPETNR	Cation:Na(E)@5		-0.0006	1925.9	3	23	1.1.1.1696.4	Winner
0	98	LGADEDSFVILEPETNR	Cation:Na(E)@5		0.0003	1925.9	3	11	1.1.1.1707.3	Winner
0	99	GSEQTTGAENEVETNALPVVSK	Cation:Na(E)@9		-0.0029	2281.07	3	24	1.1.1.1407.13	Winner
0	99	GSEQTTGAENEVETNALPVVSK	Cation:Na(E)@9		-0.0029	2281.07	3	28	1.1.1.1402.18	Winner
0	99	GSEQTTGAENEVETNALPVVSK	Cation:Na(E)@9		-0.0029	2281.07	3	31	1.1.1.1396.8	Winner
0	99	GSEQTTGAENEVETNALPVVSK	Cation:Na(E)@9		-0.0029	2281.07	3	27	1.1.1.1391.9	Winner
0	99	LSEPSLPIEDSQDLYNASPEPK	Cation:Na(E)@9		-0.0029	2450.14	3	24	1.1.1.1653.11	Winner
0	99	LSEPSLPIEDSQDLYNASPEPK	Cation:Na(E)@9		-0.0029	2450.14	3	18	1.1.1.1648.7	Winner
0	99	LSEPSLPIEDSQDLYNASPEPK	Cation:Na(E)@9		-0.0024	2450.14	3	15	1.1.1.1668.9	Winner
0	99	GSEQTTGAENEVETNALPVVSK	Cation:Na(E)@9; Deamidated(N)@15		-0.0011	2282.05	3	14	1.1.1.1362.19	Winner
0	99	ESALNLPYHMPENK	Chloro(Y)@8		0.0073	1675.75	2	14	1.1.1.1315.11	Winner
0	99	ESALNLPYHMPENK	Chloro(Y)@8		0.0073	1675.75	2	12	1.1.1.1310.12	Winner
0	99	CLEDDTQSQLLDADGFLNVR	Cyano(C)@1	cleaved F-C@N-term	-0.0036	2276.03	3	27	1.1.1.1879.4	Winner
0	99	CLEDDTQSQLLDADGFLNVR	Cyano(C)@1	cleaved F-C@N-term	-0.0036	2276.03	3	29	1.1.1.1874.3	Winner
2	99	CLEDDTQSQLLDADGFLNVR	Cyano(C)@1	cleaved F-C@N-term	-0.004	2276.03	3	24	1.1.1.1884.5	Winner
0	99	CLEDDTQSQLLDADGFLNVR	Cyano(C)@1	cleaved F-C@N-term	-0.0036	2276.03	3	25	1.1.1.1869.3	Winner
0	99	ENMEELLNLCSGK	Cys->Dha(C)@10		0.0003	1444.69	2	11	1.1.1.1705.8	Winner
0	99	ENMEELLNLCSGK	Cys->Dha(C)@10		0.0022	1444.69	2	11	1.1.1.1690.11	Winner
0	99	ENMEELLNLCSGK	Cys->Dha(C)@10		0.0022	1444.69	2	14	1.1.1.1700.9	Winner
0	99	ENMEELLNLCSGK	Cys->Dha(C)@10		0.0022	1444.69	2	13	1.1.1.1695.12	Winner
0	97.8	ENMEELLNLCSGK	Cys->Dha(C)@10		0.0003	1444.69	2	9	1.1.1.1710.8	Winner
0	19.9	QPSKLDEDDSCSLLTK	Cys->Dha(C)@11	missed K-L@4	-0.0012	1743.85	3	8	1.1.1.1235.8	Winner
0	6	QPSKLDEDDSCSLLTK	Cys->Dha(C)@11	missed K-L@4	-0.0012	1743.85	3	6	1.1.1.1240.13	Winner
0	99	ETQIITGSDESCR	Cys->Dha(C)@12		-0.0003	1403.65	2	18	1.1.1.1045.10	Winner
0	99	ETQIITGSDESCR	Cys->Dha(C)@12		-0.0003	1403.65	2	20	1.1.1.1039.11	Winner
0	99	ETQIITGSDESCR	Cys->Dha(C)@12		-0.0003	1403.65	2	17	1.1.1.1050.13	Winner
2	99	ETQIITGSDESCR	Cys->Dha(C)@12		-0.0003	1403.65	2	20	1.1.1.1033.10	Winner
0	99	ETQIITGSDESCRK	Cys->Dha(C)@12	missed R-K@13	-0.0027	1531.75	3	12	1.1.1.945.9	Winner
0	99	ETQIITGSDESCRK	Cys->Dha(C)@12	missed R-K@13	-0.0027	1531.75	3	12	1.1.1.939.5	Winner
0	99	ETQIITGSDESCRK	Cys->Dha(C)@12	missed R-K@13	-0.0027	1531.75	3	15	1.1.1.939.6	Winner
0	99	ETQIITGSDESCRK	Cys->Dha(C)@12	missed R-K@13	-0.0027	1531.75	3	13	1.1.1.950.8	Winner
2	99	ETQIITGSDESCRK	Cys->Dha(C)@12	missed R-K@13	-0.0027	1531.75	3	14	1.1.1.945.10	Winner
0	45.8	ETQIITGSDESCRK	Cys->Dha(C)@12	missed R-K@13	0.0003	1531.75	3	10	1.1.1.955.12	Winner
2	99	SETDENSGKQPSKLDEDDSCSLLTK	Cys->Dha(C)@20	missed K-Q@9; missed K-L@13	0	2691.24	4	13	1.1.1.1199.18	Winner
2	99	PTCHGNAMALLK	Cys->Dha(C)@3; Oxidation(M)@8	cleaved R-P@N-term	0.0004	1236.63	3	10	1.1.1.980.2	Winner
0	99	LDEDDSCSLLTK	Cys->Dha(C)@7		0.0004	1303.61	2	14	1.1.1.1279.16	Winner
2	99	LDEDDSCSLLTK	Cys->Dha(C)@7		0.0004	1303.61	2	12	1.1.1.1284.13	Winner
0	17.3	LDEDDSCSLLTK	Cys->Dha(C)@7		0.0002	1303.61	2	6	1.1.1.1353.11	Winner
0	99	NASRPMVIQESK	Deamidated(N)@1		0.0001	1359.68	3	15	1.1.1.1046.6	Winner
0	99	NASRPMVIQESK	Deamidated(N)@1		-0.0001	1359.68	3	10	1.1.1.1014.5	Winner
0	99	NQYQALKPR	Deamidated(N)@1		-0.0005	1117.59	2	11	1.1.1.975.11	Winner
0	99	NQYQALKPR	Deamidated(N)@1		-0.0013	1117.59	2	13	1.1.1.1030.16	Winner
0	99	NQYQALKPR	Deamidated(N)@1		-0.0013	1117.59	2	13	1.1.1.1024.16	Winner
0	99	NQYQALKPR	Deamidated(N)@1		-0.0007	1117.59	2	11	1.1.1.970.11	Winner
0	99	NQYQALKPR	Deamidated(N)@1		-0.0011	1117.59	2	12	1.1.1.1018.15	Winner
0	98.9	NASRPMVIQESK	Deamidated(N)@1		-0.0001	1359.68	3	10	1.1.1.1008.8	Winner
0	96.4	NQYQALKPR	Deamidated(N)@1		-0.0017	1117.59	2	9	1.1.1.1037.12	Winner
0	95.7	NASRPMVIQESK	Deamidated(N)@1		-0.0014	1359.68	3	8	1.1.1.1003.5	Winner
0	95	NASRPMVIQESK	Deamidated(N)@1		0.0001	1359.68	3	11	1.1.1.1051.8	Winner
0	89.5	NASRPMVIQESK	Deamidated(N)@1		0.0001	1359.68	3	9	1.1.1.1056.8	Winner
0	99	NASRPMVIQESK	Deamidated(N)@1; Deamidated(R)@4; Dioxidation(M)@6		0.0105	1392.67	2	11	1.1.1.957.10	Winner
0	99	NASRPMVIQESK	Deamidated(N)@1; Deamidated(R)@4; Oxidation(P)@5; Oxidation(M)@6		0.0099	1392.67	2	10	1.1.1.952.12	Winner
0	99	NASRPMVIQESK	Deamidated(N)@1; Oxidation(M)@6		0.0002	1375.68	3	14	1.1.1.958.4	Winner
0	99	NASRPMVIQESK	Deamidated(N)@1; Oxidation(M)@6		0.0002	1375.68	3	15	1.1.1.953.5	Winner
0	99	NASRPMVIQESK	Deamidated(N)@1; Oxidation(M)@6		0.0002	1375.68	3	18	1.1.1.948.6	Winner
0	99	NASRPMVIQESK	Deamidated(N)@1; Oxidation(M)@6		0.0007	1375.68	3	13	1.1.1.922.6	Winner
0	99	NASRPMVIQESK	Deamidated(N)@1; Oxidation(M)@6		0.0007	1375.68	3	13	1.1.1.917.7	Winner
0	96.3	NASRPMVIQESK	Deamidated(N)@1; Oxidation(M)@6		-0.0017	1375.67	2	10	1.1.1.942.14	Winner
0	96.2	NASRPMVIQESK	Deamidated(N)@1; Oxidation(M)@6		0.0007	1375.68	3	11	1.1.1.927.5	Winner
0	17.9	NASRPMVIQESK	Deamidated(N)@1; Oxidation(P)@5; Oxidation(M)@6		0.0038	1391.68	3	8	1.1.1.972.3	Winner
0	99	NFVFHTLSPVK	Deamidated(N)@1; Phospho(S)@8		0.0063	1368.65	2	12	1.1.1.1745.6	Winner
0	99	NFVFHTLSPVK	Deamidated(N)@1; Phospho(S)@8		0.0025	1368.65	2	14	1.1.1.1727.5	Winner
0	99	NFVFHTLSPVK	Deamidated(N)@1; Phospho(S)@8		0.0025	1368.65	2	15	1.1.1.1728.4	Winner
0	99	NFVFHTLSPVKAEAAK	Deamidated(N)@1; Phospho(S)@8	missed K-A@11	0.0016	1838.9	3	17	1.1.1.1607.7	Winner
0	99	NFVFHTLSPVKAEAAK	Deamidated(N)@1; Phospho(S)@8	missed K-A@11	0.0016	1838.9	3	20	1.1.1.1611.5	Winner
0	99	NFVFHTLSPVKAEAAK	Deamidated(N)@1; Phospho(S)@8	missed K-A@11	0.0062	1838.9	3	17	1.1.1.1572.6	Winner
0	99	NFVFHTLSPVKAEAAK	Deamidated(N)@1; Phospho(S)@8	missed K-A@11	0.0016	1838.9	3	14	1.1.1.1617.5	Winner
0	99	NFVFHTLSPVKAEAAK	Deamidated(N)@1; Phospho(S)@8	missed K-A@11	0.0009	1838.9	3	14	1.1.1.1624.7	Winner
0	98.7	NFVFHTLSPVKAEAAK	Deamidated(N)@1; Phospho(S)@8	missed K-A@11	0.0058	1838.9	3	12	1.1.1.1582.7	Winner
0	87.9	NFVFHTLSPVK	Deamidated(N)@1; Phospho(S)@8		0.0054	1368.65	2	10	1.1.1.1768.4	Winner
0	83	NFVFHTLSPVK	Deamidated(N)@1; Phospho(S)@8		0.0054	1368.65	2	9	1.1.1.1739.5	Winner
0	32.6	NFVFHTLSPVKAEAAK	Deamidated(N)@1; Phospho(S)@8	missed K-A@11	0.0016	1838.9	3	9	1.1.1.1602.12	Winner
0	23.6	NFVFHTLSPVKAEAAK	Deamidated(N)@1; Phospho(S)@8	missed K-A@11	0.0049	1838.9	3	7	1.1.1.1631.7	Winner
0	20.5	NFVFHTLSPVK	Deamidated(N)@1; Phospho(S)@8		0.002	1368.65	2	8	1.1.1.1733.9	Winner
0	19.6	NFVFHTLSPVK	Deamidated(N)@1; Phospho(S)@8		0.0079	1368.66	2	8	1.1.1.1781.6	Winner
0	19.6	NFVFHTLSPVKAEAAK	Deamidated(N)@1; Phospho(S)@8	missed K-A@11	0.0077	1838.9	3	7	1.1.1.1641.6	Winner
0	99	GSEQTTGAENEVETNALPVVSK	Deamidated(N)@10		0	2260.07	3	29	1.1.1.1345.15	Winner
0	99	GSEQTTGAENEVETNALPVVSK	Deamidated(N)@10		-0.0039	2260.07	3	23	1.1.1.1340.18	Winner
0	99	GSEQTTGAENEVETNALPVVSK	Deamidated(N)@10		-0.0016	2260.07	2	18	1.1.1.1351.13	Winner
0	99	GSEQTTGAENEVETNALPVVSK	Deamidated(N)@10		0.0003	2260.07	2	11	1.1.1.1423.13	Winner
0	99	GSEQTTGAENEVETNALPVVSK	Deamidated(N)@10		0.0005	2260.07	3	31	1.1.1.1350.16	Winner
0	80.3	GSEQTTGAENEVETNALPVVSK	Deamidated(N)@10; Oxidation(N)@15		0.0482	2276.11	3	12	1.1.1.1405.15	Winner
0	99	EIIDTANTTEMNSDHHSK	Deamidated(N)@12		0.0037	2042.89	3	13	1.1.1.1070.10	Winner
0	99	EIIDTANTTEMNSDHHSK	Deamidated(N)@12		0.0037	2042.89	3	15	1.1.1.1062.16	Winner
0	99	EIIDTANTTEMNSDHHSK	Deamidated(N)@12		0.0037	2042.89	3	15	1.1.1.1056.20	Winner
0	85.9	EIIDTANTTEMNSDHHSK	Deamidated(N)@12		0.0031	2042.89	4	11	1.1.1.1056.14	Winner
0	20.9	EIIDTANTTEMNSDHHSK	Deamidated(N)@12		0.0031	2042.89	4	9	1.1.1.1061.12	Winner
0	99	FTSQDASTPASSELNKQEK	Deamidated(N)@15	missed K-Q@16	0.0047	2067.96	3	17	1.1.1.1051.21	Winner
0	99	FTSQDASTPASSELNKQEK	Deamidated(N)@15	missed K-Q@16	0.0049	2067.96	3	20	1.1.1.1103.11	Winner
0	99	FTSQDASTPASSELNKQEK	Deamidated(N)@15	missed K-Q@16	0.0047	2067.96	3	12	1.1.1.1046.21	Winner
0	99	FTSQDASTPASSELNKQEK	Deamidated(N)@15	missed K-Q@16	0.0049	2067.96	3	22	1.1.1.1108.16	Winner
0	99	GSEQTTGAENEVETNALPVVSK	Deamidated(N)@15		-0.0019	2260.07	2	19	1.1.1.1353.17	Winner
0	99	GSEQTTGAENEVETNALPVVSK	Deamidated(N)@15		-0.0004	2260.07	2	13	1.1.1.1438.14	Winner
0	99	GSEQTTGAENEVETNALPVVSK	Deamidated(N)@15		-0.0004	2260.07	2	16	1.1.1.1437.19	Winner
0	99	GSEQTTGAENEVETNALPVVSK	Deamidated(N)@15		-0.0006	2260.07	3	24	1.1.1.1370.17	Winner
0	99	GSEQTTGAENEVETNALPVVSK	Deamidated(N)@15		-0.0004	2260.07	2	18	1.1.1.1431.12	Winner
0	99	GSEQTTGAENEVETNALPVVSK	Deamidated(N)@15		0	2260.07	3	24	1.1.1.1440.10	Winner
0	99	GSEQTTGAENEVETNALPVVSK	Deamidated(N)@15		0	2260.07	3	28	1.1.1.1428.13	Winner
0	99	GSEQTTGAENEVETNALPVVSK	Deamidated(N)@15		0	2260.07	3	31	1.1.1.1434.6	Winner
0	99	GSEQTTGAENEVETNALPVVSK	Deamidated(N)@15		-0.0039	2260.07	3	21	1.1.1.1375.13	Winner
0	99	GSEQTTGAENEVETNALPVVSK	Deamidated(N)@15		-0.0019	2260.07	2	21	1.1.1.1357.13	Winner
0	99	GSEQTTGAENEVETNALPVVSK	Deamidated(N)@15		-0.0019	2260.07	2	21	1.1.1.1354.15	Winner
0	99	GSEQTTGAENEVETNALPVVSK	Deamidated(N)@15		-0.0019	2260.07	2	18	1.1.1.1352.17	Winner
0	99	GSEQTTGAENEVETNALPVVSK	Deamidated(N)@15		0.0003	2260.07	3	30	1.1.1.1355.15	Winner
0	99	GSEQTTGAENEVETNALPVVSK	Deamidated(N)@15		0.0003	2260.07	3	24	1.1.1.1365.20	Winner
0	99	GSEQTTGAENEVETNALPVVSK	Deamidated(N)@15		0.0003	2260.07	3	30	1.1.1.1360.16	Winner
0	99	GSEQTTGAENEVETNALPVVSK	Deamidated(N)@15		0.0014	2260.07	3	13	1.1.1.1453.11	Winner
0	99	GSEQTTGAENEVETNALPVVSK	Deamidated(N)@15		0.0023	2260.07	2	17	1.1.1.1439.18	Winner
0	99	GSEQTTGAENEVETNALPVVSK	Deamidated(N)@15		0.0009	2260.07	3	17	1.1.1.1446.9	Winner
0	58.7	FTSQDASTPASSELNKQEK	Deamidated(N)@15	missed K-Q@16	0.0047	2067.96	3	10	1.1.1.1057.16	Winner
0	46	FTSQDASTPASSELNKQEK	Deamidated(N)@15	missed K-Q@16	0.0044	2067.96	3	8	1.1.1.1118.19	Winner
0	98.8	GSEQTTGAENEVETNALPVVSK	Deamidated(N)@15; Oxidation(P)@18		0.0482	2276.11	3	14	1.1.1.1399.9	Winner
0	97.5	GSEQTTGAENEVETNALPVVSK	Deamidated(N)@15; Oxidation(P)@18		0.0482	2276.11	3	13	1.1.1.1394.16	Winner
0	99	LGADEDSFVILEPETNRELEALK	Deamidated(N)@16	missed R-E@17	-0.0008	2588.28	3	20	1.1.1.1884.6	Winner
0	99	LGADEDSFVILEPETNRELEALK	Deamidated(N)@16	missed R-E@17	-0.0004	2588.29	3	29	1.1.1.1874.4	Winner
0	99	LGADEDSFVILEPETNRELEALK	Deamidated(N)@16	missed R-E@17	0.004	2588.29	3	24	1.1.1.1802.6	Winner
0	99	LGADEDSFVILEPETNRELEALK	Deamidated(N)@16	missed R-E@17	0.004	2588.29	3	25	1.1.1.1807.9	Winner
0	99	LGADEDSFVILEPETNRELEALK	Deamidated(N)@16	missed R-E@17	-0.0004	2588.29	3	23	1.1.1.1879.5	Winner
0	99	LGADEDSFVILEPETNRELEALK	Deamidated(N)@16	missed R-E@17	-0.0004	2588.29	3	27	1.1.1.1869.4	Winner
0	99	LSEPSLPIEDSQDLYNASPEPK	Deamidated(N)@16		0.0072	2429.16	2	12	1.1.1.1641.14	Winner
0	99	LSEPSLPIEDSQDLYNASPEPK	Deamidated(N)@16		0.0011	2429.15	3	17	1.1.1.1629.18	Winner
0	99	LSEPSLPIEDSQDLYNASPEPK	Deamidated(N)@16		0.0005	2429.15	3	26	1.1.1.1635.13	Winner
0	99	LSEPSLPIEDSQDLYNASPEPK	Deamidated(N)@16		0.0011	2429.15	3	14	1.1.1.1632.13	Winner
0	99	LSEPSLPIEDSQDLYNASPEPK	Deamidated(N)@16		0.0058	2429.15	3	23	1.1.1.1676.9	Winner
0	99	LSEPSLPIEDSQDLYNASPEPK	Deamidated(N)@16		0.0067	2429.16	2	14	1.1.1.1634.7	Winner
0	55.8	GGLVAFEPHALEGEGPQNPEETDEKVEEPEQQNK	Deamidated(N)@18; Phospho(T)@22; Propionamide(K)@25	cleaved V-G@N-term; missed K-V@25	-0.0085	3882.7	5	12	1.1.1.1533.8	Winner
0	99	DLVKNEELEIQEK	Deamidated(N)@5	missed K-N@4	-0.0005	1586.8	3	10	1.1.1.1388.7	Winner
0	99	DLVKNEELEIQEK	Deamidated(N)@5	missed K-N@4	-0.0015	1586.8	3	15	1.1.1.1304.7	Winner
0	99	DLVKNEELEIQEK	Deamidated(N)@5	missed K-N@4	-0.0015	1586.8	3	20	1.1.1.1294.9	Winner
0	99	DLVKNEELEIQEK	Deamidated(N)@5	missed K-N@4	0.0006	1586.8	3	18	1.1.1.1383.5	Winner
0	99	DLVKNEELEIQEK	Deamidated(N)@5	missed K-N@4	0.0005	1586.8	3	18	1.1.1.1378.6	Winner
0	99	DLVKNEELEIQEK	Deamidated(N)@5	missed K-N@4	-0.0015	1586.8	3	19	1.1.1.1299.6	Winner
0	98.6	DLVKNEELEIQEK	Deamidated(N)@5	missed K-N@4	-0.0015	1586.8	3	11	1.1.1.1289.10	Winner
0	75.7	ESALNLPYHMPENK	Deamidated(N)@5		0.0007	1642.77	3	9	1.1.1.1454.6	Winner
0	99	ESALNLPYHMPENK	Deamidated(N)@5; Oxidation(M)@10		0.0024	1658.76	3	13	1.1.1.1299.7	Winner
0	97.4	ESALNLPYHMPENK	Deamidated(N)@5; Oxidation(M)@10		0.0024	1658.76	3	12	1.1.1.1288.11	Winner
0	51.3	ESALNLPYHMPENK	Deamidated(N)@5; Oxidation(M)@10		0.0024	1658.76	3	10	1.1.1.1293.11	Winner
0	51.3	ESALNLPYHMPENK	Deamidated(N)@5; Oxidation(M)@10		-0.0001	1658.76	3	10	1.1.1.1304.10	Winner
0	99	TGSLLNQPK	Deamidated(N)@6		0.0011	957.514	2	12	1.1.1.1041.5	Winner
0	99	TGSLLNQPK	Deamidated(N)@6		0.0007	957.514	2	10	1.1.1.1061.11	Winner
0	99	TGSLLNQPK	Deamidated(N)@6		0.0011	957.514	2	12	1.1.1.1035.7	Winner
0	99	EIIDTANTTEMNSDHHSK	Deamidated(N)@7		0.0031	2042.89	4	13	1.1.1.1067.8	Winner
0	96.4	EIIDTANTTEMNSDHHSK	Deamidated(N)@7		0.0031	2042.89	4	12	1.1.1.1072.8	Winner
0	96.4	EIIDTANTTEMNSDHHSK	Deamidated(N)@7; Oxidation(M)@11		0.0018	2058.88	4	12	1.1.1.969.10	Winner
0	99	AGQTVNVNVIVK	Deamidated(N)@8		-0.0002	1241.7	2	14	1.1.1.1241.14	Winner
0	99	AGQTVNVNVIVK	Deamidated(N)@8		-0.0002	1241.7	2	12	1.1.1.1236.16	Winner
0	99	LAALSDHNPSAPR	Deamidated(N)@8		0.0032	1348.68	3	15	1.1.1.1056.7	Winner
0	99	LAALSDHNPSAPR	Deamidated(N)@8		0.0032	1348.68	3	13	1.1.1.1061.7	Winner
0	98	AGQTVNVNVIVK	Deamidated(N)@8		-0.003	1241.69	2	10	1.1.1.1287.11	Winner
0	91.7	LAALSDHNPSAPR	Deamidated(N)@8		0.0021	1348.68	2	8	1.1.1.1059.14	Winner
0	97.5	LLDADGFLNVR	Deamidated(N)@9	cleaved Q-L@N-term	0.0192	1232.66	2	11	1.1.1.1664.2	Winner
0	99	DLVKNEELEIQEK	Deamidated(Q)@11	missed K-N@4	-0.0007	1586.8	2	16	1.1.1.1363.20	Winner
0	99	DLVKNEELEIQEK	Deamidated(Q)@11	missed K-N@4	0.0005	1586.8	3	16	1.1.1.1373.7	Winner
0	99	DLVKNEELEIQEK	Deamidated(Q)@11	missed K-N@4	0.0005	1586.8	3	18	1.1.1.1368.7	Winner
0	99	LSEPSLPIEDSQDLYNASPEPK	Deamidated(Q)@12		0.0031	2429.15	2	10	1.1.1.1675.15	Winner
0	99	LSEPSLPIEDSQDLYNASPEPK	Deamidated(Q)@12		0.0058	2429.15	3	25	1.1.1.1678.14	Winner
0	99	LSEPSLPIEDSQDLYNASPEPK	Deamidated(Q)@12		0.0062	2429.15	3	20	1.1.1.1688.15	Winner
0	99	LSEPSLPIEDSQDLYNASPEPK	Deamidated(Q)@12		0.0058	2429.15	3	20	1.1.1.1681.14	Winner
0	98.6	LSEPSLPIEDSQDLYNASPEPK	Deamidated(Q)@12; Oxidation(D)@13		0.0485	2445.19	3	15	1.1.1.1657.9	Winner
0	99	NPFEAIRPGSAQQVK	Deamidated(Q)@13		-0.0004	1641.85	3	13	1.1.1.1296.11	Winner
0	97.1	NPFEAIRPGSAQQVK	Deamidated(Q)@13		-0.0004	1641.85	3	12	1.1.1.1301.14	Winner
0	97.1	NPFEAIRPGSAQQVK	Deamidated(Q)@13		0	1641.85	3	12	1.1.1.1306.16	Winner
0	99	ITAEEEEEIGEDSQFMILAK	Deamidated(Q)@14; Oxidation(M)@16		0.0569	2298.1	3	22	1.1.1.1742.6	Winner
0	99	FTSQDASTPASSELNKQEK	Deamidated(Q)@17	missed K-Q@16	0.0049	2067.96	3	23	1.1.1.1113.18	Winner
0	96.6	NQYQALKPR	Deamidated(Q)@2		-0.0005	1117.59	2	11	1.1.1.955.14	Winner
0	99	ETQIITGSDESCRK	Deamidated(Q)@3; Propionamide(C)@12	missed R-K@13	0.0035	1637.76	3	11	1.1.1.976.11	Winner
0	99	GSEQTTGAENEVETNALPVVSK	Deamidated(Q)@4		0.0003	2260.07	2	17	1.1.1.1418.16	Winner
0	99	NQYQALKPR	Deamidated(Q)@4		-0.0005	1117.59	2	12	1.1.1.960.12	Winner
0	98	NQYQALKPR	Deamidated(Q)@4		-0.0005	1117.59	2	9	1.1.1.965.13	Winner
0	98	GSEQTTGAENEVETNALPVVSK	Deamidated(Q)@4; Cation:Na(E)@11		-0.0007	2282.05	3	14	1.1.1.1418.14	Winner
0	32.6	GSEQTTGAENEVETNALPVVSK	Deamidated(Q)@4; Deamidated(N)@10; Deamidated(N)@15		0.0418	2262.08	3	10	1.1.1.1440.11	Winner
0	77.8	GSEQTTGAENEVETNALPVVSK	Deamidated(Q)@4; Oxidation(N)@10		0.0483	2276.11	3	12	1.1.1.1402.17	Winner
2	99	PMVIQESK	Deamidated(Q)@5	cleaved R-P@N-term	0.0044	931.473	2	7	1.1.1.1001.4	Winner
0	99	TGSLLNQPK	Deamidated(Q)@7		0.0011	957.514	2	13	1.1.1.1051.11	Winner
0	99	TGSLLNQPK	Deamidated(Q)@7		0.0011	957.514	2	12	1.1.1.1056.11	Winner
0	99	TGSLLNQPK	Deamidated(Q)@7		0.0011	957.514	2	11	1.1.1.1046.9	Winner
0.57	95	ELEALKQR	Deamidated(Q)@7	missed K-Q@6	-0.0007	986.539	2	7	1.1.1.965.6	Winner
0	49.1	NEELEIQEK	Deamidated(Q)@7		0.0188	1131.55	2	9	1.1.1.1055.7	Winner
0	21	ELEALKQR	Deamidated(Q)@7	missed K-Q@6	-0.0009	986.539	2	5	1.1.1.960.6	Winner
0	20.9	ELEALKQR	Deamidated(Q)@7	missed K-Q@6	-0.0007	986.539	2	6	1.1.1.970.7	Winner
0	19.6	NIDDASQMDLFHR	Deamidated(Q)@7; Oxidation(M)@8		0.0025	1577.68	3	6	1.1.1.1340.9	Winner
0	89.4	NASRPMVIQESK	Deamidated(Q)@9		0.0025	1359.68	3	11	1.1.1.970.5	Winner
0	20.8	NASRPMVIQESK	Deamidated(Q)@9		0.0025	1359.68	3	6	1.1.1.965.4	Winner
0	99	RGPSFMTSPSPK	Deamidated(R)@1; Oxidation(M)@6	missed R-G@1	0.0193	1307.64	3	11	1.1.1.953.4	Winner
0	21.9	RGPSFMTSPSPK	Deamidated(R)@1; Oxidation(M)@6	missed R-G@1	0.0196	1307.64	3	7	1.1.1.961.4	Winner
1.23	99	KLDGASHTKPGEK	Dehydrated(E)@12	missed K-L@1	-0.0013	1348.71	3	12	1.1.1.628.2	Winner
0	27.9	TGSLLNQPK	Dehydrated(S)@3		-0.0012	938.518	2	6	1.1.1.989.3	Winner
0	99	KLDGASHTKPGEK	Delta:H(2)C(2)(K)@1	missed K-L@1	-0.0011	1392.73	3	14	1.1.1.742.2	Winner
0.96	99	ASLVSSASK	Delta:H(2)C(2)@N-term		0.0013	874.477	2	10	1.1.1.879.2	Winner
0.97	99	SSAVGPPEK	Delta:H(2)C(2)@N-term		0.0016	896.462	2	9	1.1.1.869.2	Winner
0.95	99	TDDSTSGLTR	Delta:H(2)C(2)@N-term		0.0002	1077.49	2	9	1.1.1.927.11	Winner
0	33.9	SSAVGPPEK	Delta:H(2)C(2)@N-term		-0.0001	896.46	2	6	1.1.1.875.3	Winner
0	19.9	TDDSTSGLTR	Delta:H(2)C(2)@N-term		0.0002	1077.49	2	7	1.1.1.921.7	Winner
0	11.9	ASLVSSASK	Delta:H(2)C(2)@N-term		0.0013	874.477	2	8	1.1.1.884.4	Winner
0	82.5	ESALNLPYHMPENK	Delta:H(2)C(2)@N-term; Oxidation(M)@10		-0.0005	1683.79	3	10	1.1.1.1337.8	Winner
0	93.5	DLVKNEELEIQEK	Delta:H(4)C(2)(K)@13	missed K-N@4	-0.0021	1613.85	3	11	1.1.1.1460.6	Winner
0	99	SSAVGPPEK	Delta:H(4)C(2)(K)@9		0.0005	898.476	2	10	1.1.1.975.6	Winner
0	43.9	SSAVGPPEK	Delta:H(4)C(2)(K)@9		0.0005	898.476	2	7	1.1.1.970.3	Winner
0	99	GSEQTTGAENEVETNALPVVSK	Delta:H(4)C(2)@N-term		0.0014	2287.12	3	19	1.1.1.1463.13	Winner
0	99	LGADEDSFVILEPETNR	Delta:H(4)C(2)@N-term		-0.003	1931.94	2	18	1.1.1.1826.4	Winner
0.94	99	VEEPEQQNK	Delta:H(4)C(2)@N-term		-0.0002	1127.55	2	10	1.1.1.856.9	Winner
0	99	VEEPEQQNK	Delta:H(4)C(2)@N-term		-0.0002	1127.55	2	12	1.1.1.851.8	Winner
0	17.9	VEEPEQQNK	Delta:H(4)C(2)@N-term		-0.0002	1127.55	2	8	1.1.1.846.6	Winner
0	99	GSEQTTGAENEVETNALPVVSK	Dimethyl(N)@10		-0.0033	2287.11	3	18	1.1.1.1537.10	Winner
0	99	GSEQTTGAENEVETNALPVVSK	Dimethyl(N)@10		-0.0033	2287.11	3	18	1.1.1.1532.11	Winner
0	99	GSEQTTGAENEVETNALPVVSK	Dimethyl(N)@15		0.0014	2287.12	3	15	1.1.1.1542.9	Winner
0	99	LGADEDSFVILEPETNR	Dimethyl(R)@17		-0.003	1931.94	2	19	1.1.1.1831.4	Winner
0	97.8	NQEDDVEQPFNDSGCLLVDK	Dioxidation(C)@15; Carboxy(D)@19		0.0225	2339.99	3	13	1.1.1.1658.12	Winner
2	99	MGYFPTEEK	Dioxidation(M)@1		0.0005	1132.48	2	14	1.1.1.1209.4	Winner
0	99	MGYFPTEEK	Dioxidation(M)@1		0.0009	1132.48	2	11	1.1.1.1186.8	Winner
0	99	MGYFPTEEK	Dioxidation(M)@1		0.0009	1132.48	2	14	1.1.1.1192.9	Winner
0	99	MGYFPTEEK	Dioxidation(M)@1		0.0009	1132.48	2	14	1.1.1.1202.12	Winner
0	99	MGYFPTEEK	Dioxidation(M)@1		0.0009	1132.48	2	11	1.1.1.1197.7	Winner
0	99	ESALNLPYHMPENK	Dioxidation(M)@10		-0.0017	1673.77	3	10	1.1.1.1303.12	Winner
0	99	ESALNLPYHMPENK	Dioxidation(M)@10		-0.0017	1673.77	3	13	1.1.1.1293.13	Winner
0	99	ESALNLPYHMPENK	Dioxidation(M)@10		-0.0017	1673.77	3	12	1.1.1.1288.12	Winner
0	99	ESALNLPYHMPENK	Dioxidation(M)@10		-0.0014	1673.77	3	9	1.1.1.1283.13	Winner
0	99	TVADSDESYMEK	Dioxidation(M)@10		-0.0018	1405.55	2	9	1.1.1.917.13	Winner
0	99	TVADSDESYMEK	Dioxidation(M)@10		-0.0018	1405.55	2	11	1.1.1.922.11	Winner
0	43.9	ESALNLPYHMPENK	Dioxidation(M)@10		-0.0017	1673.77	3	10	1.1.1.1298.11	Winner
0	99	EIIDTANTTEMNSDHHSK	Dioxidation(M)@11		-0.0013	2073.89	4	14	1.1.1.948.11	Winner
0	99	EIIDTANTTEMNSDHHSK	Dioxidation(M)@11		0.0002	2073.89	3	12	1.1.1.948.16	Winner
0	99	EIIDTANTTEMNSDHHSK	Dioxidation(M)@11		-0.0013	2073.89	4	16	1.1.1.958.8	Winner
0	99	EIIDTANTTEMNSDHHSK	Dioxidation(M)@11		-0.0013	2073.89	4	14	1.1.1.953.12	Winner
0	99	EIIDTANTTEMNSDHHSK	Dioxidation(M)@11		0.0002	2073.89	3	18	1.1.1.959.14	Winner
0	19.9	EIIDTANTTEMNSDHHSK	Dioxidation(M)@11		-0.0013	2073.89	4	8	1.1.1.948.10	Winner
0	99	EIIDTANTTEMNSDHHSK	Dioxidation(M)@11; Deamidated(N)@12		0.0058	2074.88	4	13	1.1.1.969.11	Winner
0	99	LPLASMDENAMDANMDELLDLCTGK	Dioxidation(M)@11; Oxidation(M)@15; Trioxidation(C)@22; Formyl(K)@25		0.019	2833.18	3	23	1.1.1.1833.7	Winner
0	99	LPLASMDENAMDANMDELLDLCTGK	Dioxidation(M)@11; Oxidation(M)@15; Trioxidation(C)@22; Formyl(K)@25		0.019	2833.18	3	19	1.1.1.1843.8	Winner
0	99	LPLASMDENAMDANMDELLDLCTGK	Dioxidation(M)@11; Oxidation(M)@15; Trioxidation(C)@22; Formyl(K)@25		0.019	2833.18	3	21	1.1.1.1823.5	Winner
0	99	LPLASMDENAMDANMDELLDLCTGK	Dioxidation(M)@11; Oxidation(M)@15; Trioxidation(C)@22; Formyl(K)@25		0.019	2833.18	3	24	1.1.1.1828.5	Winner
0	99	LPLASMDENAMDANMDELLDLCTGK	Dioxidation(M)@11; Oxidation(M)@15; Trioxidation(C)@22; Formyl(K)@25		0.019	2833.18	3	22	1.1.1.1838.4	Winner
0	99	DMGTDGKEELKADVVPVTLAPK	Dioxidation(M)@2	missed K-E@7; missed K-A@11	-0.0001	2344.18	3	21	1.1.1.1444.12	Winner
0	99	DMGTDGKEELKADVVPVTLAPK	Dioxidation(M)@2	missed K-E@7; missed K-A@11	-0.0001	2344.18	3	23	1.1.1.1443.14	Winner
0	99	DMGTDGKEELKADVVPVTLAPK	Dioxidation(M)@2	missed K-E@7; missed K-A@11	-0.0001	2344.18	3	16	1.1.1.1452.10	Winner
0	99	DMGTDGKEELKADVVPVTLAPK	Dioxidation(M)@2	missed K-E@7; missed K-A@11	-0.0001	2344.18	3	19	1.1.1.1446.11	Winner
0	99	DMGTDGKEELKADVVPVTLAPK	Dioxidation(M)@2	missed K-E@7; missed K-A@11	-0.0001	2344.18	3	19	1.1.1.1436.10	Winner
0	99	DMGTDGKEELKADVVPVTLAPK	Dioxidation(M)@2	missed K-E@7; missed K-A@11	-0.0001	2344.18	4	14	1.1.1.1455.7	Winner
0	99	DMGTDGKEELKADVVPVTLAPK	Dioxidation(M)@2	missed K-E@7; missed K-A@11	-0.0021	2344.18	4	20	1.1.1.1448.8	Winner
0	99	DMGTDGKEELKADVVPVTLAPK	Dioxidation(M)@2	missed K-E@7; missed K-A@11	-0.0021	2344.18	4	21	1.1.1.1442.11	Winner
0	99	DMGTDGKEELKADVVPVTLAPK	Dioxidation(M)@2	missed K-E@7; missed K-A@11	-0.0013	2344.18	4	18	1.1.1.1436.8	Winner
0	99	PMVIQESK	Dioxidation(M)@2	cleaved R-P@N-term	0.0013	962.476	2	8	1.1.1.874.7	Winner
0	97.8	DMGTDGKEELKADVVPVTLAPK	Dioxidation(M)@2	missed K-E@7; missed K-A@11	-0.0003	2344.18	3	10	1.1.1.1457.11	Winner
0	93.5	DMGTDGKEELKADVVPVTLAPK	Dioxidation(M)@2	missed K-E@7; missed K-A@11	-0.0016	2344.18	4	9	1.1.1.1462.11	Winner
0	49.5	DMGTDGKEELKADVVPVTLAPK	Dioxidation(M)@2	missed K-E@7; missed K-A@11	-0.0001	2344.18	3	8	1.1.1.1453.12	Winner
0	19.9	PMVIQESK	Dioxidation(M)@2	cleaved R-P@N-term	0.0013	962.476	2	5	1.1.1.880.9	Winner
0	99	NASRPMVIQESK	Dioxidation(M)@6		-0.0013	1390.69	3	11	1.1.1.892.11	Winner
0	99	RGPSFMTSPSPK	Dioxidation(M)@6	missed R-G@1	-0.0007	1322.63	3	13	1.1.1.963.6	Winner
0	99	RGPSFMTSPSPK	Dioxidation(M)@6	missed R-G@1	-0.0007	1322.63	3	10	1.1.1.968.4	Winner
0	99	NASRPMVIQESK	Dioxidation(R)@4; Oxidation(P)@5; Met->Hcy(M)@6		-0.0013	1392.67	2	15	1.1.1.947.9	Winner
0	99	PMVIQESK	Formyl@N-term	cleaved R-P@N-term	0.0019	958.481	2	10	1.1.1.882.7	Winner
0	99	PMVIQESK	Formyl@N-term	cleaved R-P@N-term	0.0019	958.481	2	10	1.1.1.877.5	Winner
0	99	PMVIQESK	Formyl@N-term	cleaved R-P@N-term	0.0024	958.482	2	10	1.1.1.892.13	Winner
0	45.8	PMVIQESK	Formyl@N-term	cleaved R-P@N-term	0.0024	958.482	2	9	1.1.1.887.8	Winner
0	99	PTCHGNAMALLK	Formyl@N-term; Dioxidation(C)@3; Oxidation(M)@8	cleaved R-P@N-term	0.0016	1330.6	2	13	1.1.1.1112.15	Winner
0	99	PTCHGNAMALLK	Formyl@N-term; Dioxidation(C)@3; Oxidation(M)@8	cleaved R-P@N-term	0.0016	1330.6	2	12	1.1.1.1107.20	Winner
0	99	PTCHGNAMALLK	Formyl@N-term; Dioxidation(C)@3; Oxidation(M)@8	cleaved R-P@N-term	0.0016	1330.6	2	15	1.1.1.1102.18	Winner
0	99	QLGVDVSIKPR	Gln->pyro-Glu@N-term		0.0001	1193.68	2	12	1.1.1.1473.8	Winner
0	99	QLGVDVSIKPR	Gln->pyro-Glu@N-term		0.0021	1193.68	2	10	1.1.1.1498.8	Winner
0	99	QLGVDVSIKPR	Gln->pyro-Glu@N-term		-0.0001	1193.68	2	11	1.1.1.1483.9	Winner
0	99	QLGVDVSIKPR	Gln->pyro-Glu@N-term		0.0001	1193.68	2	13	1.1.1.1468.8	Winner
0	99	QLGVDVSIKPR	Gln->pyro-Glu@N-term		0.0001	1193.68	2	12	1.1.1.1470.9	Winner
0	99	QLGVDVSIKPR	Gln->pyro-Glu@N-term		-0.0001	1193.68	2	13	1.1.1.1478.6	Winner
0	99	QLGVDVSIKPR	Gln->pyro-Glu@N-term		-0.0004	1193.68	2	12	1.1.1.1463.8	Winner
0	99	QLGVDVSIKPR	Gln->pyro-Glu@N-term		-0.0004	1193.68	2	15	1.1.1.1452.4	Winner
0	99	QLGVDVSIKPR	Gln->pyro-Glu@N-term		-0.0004	1193.68	2	16	1.1.1.1458.6	Winner
2	99	QLGVDVSIKPR	Gln->pyro-Glu@N-term		-0.0004	1193.68	2	14	1.1.1.1456.8	Winner
0	99	QLHSETQR	Gln->pyro-Glu@N-term		-0.0007	980.467	2	11	1.1.1.833.4	Winner
0	99	QLHSETQR	Gln->pyro-Glu@N-term		-0.0005	980.467	2	12	1.1.1.828.5	Winner
0	99	QLHSETQR	Gln->pyro-Glu@N-term		-0.0005	980.467	2	12	1.1.1.818.3	Winner
2	99	QLHSETQR	Gln->pyro-Glu@N-term		-0.0005	980.467	2	10	1.1.1.838.4	Winner
0	99	QLHSETQR	Gln->pyro-Glu@N-term		-0.0005	980.467	2	12	1.1.1.823.5	Winner
0	99	QSDIRPSPGDSSVLQQ	Gln->pyro-Glu@N-term	cleaved Q-E@C-term	0.0006	1695.81	2	16	1.1.1.1353.15	Winner
2	99	QSDIRPSPGDSSVLQQ	Gln->pyro-Glu@N-term	cleaved Q-E@C-term	0.0006	1695.81	2	19	1.1.1.1348.16	Winner
1.82	99	QYQALKPR	Gln->pyro-Glu@N-term	cleaved N-Q@N-term	-0.0001	985.534	2	9	1.1.1.914.7	Winner
0	98.2	QLGVDVSIKPR	Gln->pyro-Glu@N-term		-0.0004	1193.68	2	10	1.1.1.1493.9	Winner
0	98.2	QLHSETQR	Gln->pyro-Glu@N-term		-0.0005	980.467	2	10	1.1.1.844.4	Winner
0	45.8	QYQALKPR	Gln->pyro-Glu@N-term	cleaved N-Q@N-term	-0.0001	985.534	2	8	1.1.1.919.9	Winner
0	19.6	QLGVDVSIKPR	Gln->pyro-Glu@N-term		0.0019	1193.68	2	7	1.1.1.1503.9	Winner
0	21	QLGVDVSIKPR	Gln->pyro-Glu@N-term; Phospho(S)@7		0.0082	1273.65	3	7	1.1.1.924.5	Winner
0	92.6	ESSMGDPMEEALALCSGSFPTDKEEEDEEEEFGDFR	Glu->pyro-Glu@N-term; Dehydrated(S)@3; Oxidation(M)@8; Propionamide(C)@15	missed K-E@23	-0.0992	4092.53	4	13	1.1.1.1855.8	Winner
0	99	ESALNLPYHMPENK	Glu->pyro-Glu@N-term; Oxidation(M)@10		0.0026	1639.77	2	10	1.1.1.1395.20	Winner
0	99	ESALNLPYHMPENK	Glu->pyro-Glu@N-term; Oxidation(M)@10		0.0026	1639.77	2	11	1.1.1.1388.15	Winner
0	19.7	ESALNLPYHMPENK	Glu->pyro-Glu@N-term; Oxidation(M)@10		0.0032	1639.77	2	7	1.1.1.1401.14	Winner
0	19.6	ESALNLPYHMPENK	Glu->pyro-Glu@N-term; Oxidation(M)@10		0.0026	1639.77	2	6	1.1.1.1390.19	Winner
0	99	EIIDTANTTEMNSDHHSK	Glu->pyro-Glu@N-term; Oxidation(M)@11		-0.0022	2039.88	3	18	1.1.1.1092.10	Winner
0	99	EIIDTANTTEMNSDHHSK	Glu->pyro-Glu@N-term; Oxidation(M)@11		-0.0022	2039.88	3	13	1.1.1.1098.10	Winner
0	95.5	EIIDTANTTEMNSDHHSK	Glu->pyro-Glu@N-term; Oxidation(M)@11		-0.0022	2039.88	3	11	1.1.1.1086.13	Winner
0	99	ETQIITGSDESCRK	Glu->pyro-Glu@N-term; Propionamide(C)@12	missed R-K@13	-0.0012	1618.76	3	9	1.1.1.952.9	Winner
0	99	TVADSDESYMEK	Methyl(D)@6; Methyl(E)@7; Oxidation(M)@10		0.0013	1417.59	2	13	1.1.1.1064.10	Winner
0	99	TVADSDESYMEK	Oxidation(D)@4		-0.0003	1389.56	2	11	1.1.1.1047.20	Winner
0	89.3	SLSSDSTLLLFK	Oxidation(D)@5		0.0004	1325.71	2	9	1.1.1.1705.6	Winner
0	84.5	SLSSDSTLLLFK	Oxidation(D)@5		0.0002	1325.71	2	9	1.1.1.1700.7	Winner
0	80.3	SLSSDSTLLLFK	Oxidation(D)@5		0.0026	1325.71	2	8	1.1.1.1711.8	Winner
0	57.8	SLSSDSTLLLFK	Oxidation(D)@5		0.0004	1325.71	2	8	1.1.1.1695.10	Winner
0	99	MGYFPTEEK	Oxidation(M)@1		-0.0015	1116.48	2	9	1.1.1.1236.13	Winner
0	99	MGYFPTEEK	Oxidation(M)@1		0.001	1116.48	2	14	1.1.1.1180.5	Winner
0	99	MGYFPTEEK	Oxidation(M)@1		0.001	1116.48	2	14	1.1.1.1168.5	Winner
0	99	MGYFPTEEK	Oxidation(M)@1		0.001	1116.48	2	14	1.1.1.1162.4	Winner
0	99	MGYFPTEEK	Oxidation(M)@1		0.0008	1116.48	2	12	1.1.1.1186.6	Winner
0	99	MGYFPTEEK	Oxidation(M)@1		0.001	1116.48	2	12	1.1.1.1192.7	Winner
0	99	MGYFPTEEK	Oxidation(M)@1		0.001	1116.48	2	12	1.1.1.1197.5	Winner
0	99	MGYFPTEEK	Oxidation(M)@1		0.001	1116.48	2	14	1.1.1.1156.3	Winner
0	99	MGYFPTEEK	Oxidation(M)@1		0.001	1116.48	2	14	1.1.1.1174.3	Winner
0	99	MGYFPTEEKSETDENSGK	Oxidation(M)@1	missed K-S@9	0.0041	2063.87	3	20	1.1.1.1116.19	Winner
0	99	MGYFPTEEKSETDENSGK	Oxidation(M)@1	missed K-S@9	0.0041	2063.87	3	22	1.1.1.1106.20	Winner
0	99	MGYFPTEEKSETDENSGK	Oxidation(M)@1	missed K-S@9	0.0036	2063.87	3	18	1.1.1.1121.12	Winner
0	99	MGYFPTEEKSETDENSGK	Oxidation(M)@1	missed K-S@9	0.0041	2063.87	3	18	1.1.1.1100.18	Winner
0	99	MGYFPTEEKSETDENSGK	Oxidation(M)@1	missed K-S@9	0.0041	2063.87	3	22	1.1.1.1111.18	Winner
0	98.7	MGYFPTEEK	Oxidation(M)@1		-0.0015	1116.48	2	8	1.1.1.1277.10	Winner
0	98.7	MGYFPTEEK	Oxidation(M)@1		-0.0018	1116.48	2	9	1.1.1.1256.18	Winner
0	98.7	MGYFPTEEK	Oxidation(M)@1		0.001	1116.48	2	10	1.1.1.1150.13	Winner
0	98.5	MGYFPTEEK	Oxidation(M)@1		-0.0009	1116.48	2	11	1.1.1.1208.6	Winner
0	96.1	MGYFPTEEK	Oxidation(M)@1		-0.0006	1116.48	2	10	1.1.1.1202.10	Winner
1.03	90.7	MGYFPTEEKSETDENSGKQPSK	Oxidation(M)@1	missed K-S@9; missed K-Q@18	0.002	2504.1	4	11	1.1.1.1054.19	Winner
0	87.3	MGYFPTEEK	Oxidation(M)@1		-0.0015	1116.48	2	7	1.1.1.1231.12	Winner
0	79.6	MGYFPTEEK	Oxidation(M)@1		-0.0008	1116.48	2	7	1.1.1.1267.12	Winner
0	67.6	MGYFPTEEK	Oxidation(M)@1		0.0019	1116.48	2	9	1.1.1.1214.9	Winner
0	67	MGYFPTEEK	Oxidation(M)@1		-0.0006	1116.48	2	6	1.1.1.1241.10	Winner
0	21.6	MGYFPTEEK	Oxidation(M)@1		-0.0018	1116.48	2	6	1.1.1.1251.14	Winner
0	20.8	MGYFPTEEK	Oxidation(M)@1		-0.0018	1116.48	2	5	1.1.1.1272.8	Winner
0	99	MGYFPTEEKSETDENSGK	Oxidation(M)@1; Deamidated(N)@15	missed K-S@9	0.0057	2064.85	3	11	1.1.1.1134.16	Winner
0	99	MGYFPTEEKSETDENSGK	Oxidation(M)@1; Deamidated(N)@15	missed K-S@9	0.0057	2064.85	3	20	1.1.1.1129.10	Winner
0	97.8	MGYFPTEEKSETDENSGK	Oxidation(M)@1; Deamidated(N)@15	missed K-S@9	0.0057	2064.85	3	12	1.1.1.1123.16	Winner
0	30.6	MGYFPTEEK	Oxidation(M)@1; Delta:H(4)C(2)(K)@9		0.0002	1144.51	2	8	1.1.1.1352.11	Winner
0	8	MGYFPTEEK	Oxidation(M)@1; Oxidation(Y)@3		0.0005	1132.48	2	8	1.1.1.1017.13	Winner
0	99	ESALNLPYHMPENK	Oxidation(M)@10		-0.0032	1657.77	3	14	1.1.1.1278.13	Winner
0	99	ESALNLPYHMPENK	Oxidation(M)@10		-0.0028	1657.77	3	16	1.1.1.1258.12	Winner
0	99	ESALNLPYHMPENK	Oxidation(M)@10		-0.0028	1657.77	3	14	1.1.1.1273.11	Winner
0	99	ESALNLPYHMPENK	Oxidation(M)@10		-0.0028	1657.77	3	14	1.1.1.1253.12	Winner
0	99	ESALNLPYHMPENK	Oxidation(M)@10		-0.0028	1657.77	3	17	1.1.1.1263.14	Winner
0	99	ESALNLPYHMPENK	Oxidation(M)@10		-0.0028	1657.77	3	16	1.1.1.1268.12	Winner
0	99	TVADSDESYMEK	Oxidation(M)@10		-0.0013	1389.56	2	9	1.1.1.958.11	Winner
0	99	TVADSDESYMEK	Oxidation(M)@10		-0.0006	1389.56	2	13	1.1.1.926.9	Winner
0	99	TVADSDESYMEK	Oxidation(M)@10		-0.0013	1389.56	2	9	1.1.1.979.13	Winner
0	99	TVADSDESYMEK	Oxidation(M)@10		-0.0009	1389.56	2	12	1.1.1.921.11	Winner
0	99	TVADSDESYMEK	Oxidation(M)@10		-0.0012	1389.56	2	15	1.1.1.891.4	Winner
0	99	TVADSDESYMEK	Oxidation(M)@10		-0.0003	1389.56	2	9	1.1.1.950.12	Winner
0	99	TVADSDESYMEK	Oxidation(M)@10		0.0009	1389.56	2	21	1.1.1.901.8	Winner
0	99	TVADSDESYMEK	Oxidation(M)@10		0.0009	1389.56	2	18	1.1.1.916.11	Winner
0	99	TVADSDESYMEK	Oxidation(M)@10		0.0009	1389.56	2	21	1.1.1.911.10	Winner
0	99	TVADSDESYMEK	Oxidation(M)@10		0.0009	1389.56	2	21	1.1.1.906.7	Winner
0	99	TVADSDESYMEK	Oxidation(M)@10		0.0009	1389.56	2	21	1.1.1.896.5	Winner
0	99	TVADSDESYMEK	Oxidation(M)@10		-0.0019	1389.56	2	9	1.1.1.932.15	Winner
0	97.3	TVADSDESYMEK	Oxidation(M)@10		-0.0013	1389.56	2	8	1.1.1.972.11	Winner
0	85.6	ESALNLPYHMPENK	Oxidation(M)@10		0.002	1657.78	3	10	1.1.1.1357.6	Winner
0	68.4	ESALNLPYHMPENK	Oxidation(M)@10		-0.0034	1657.77	3	10	1.1.1.1283.12	Winner
0	67	TVADSDESYMEK	Oxidation(M)@10		-0.0012	1389.56	2	7	1.1.1.1009.16	Winner
0	27.8	ESALNLPYHMPENK	Oxidation(M)@10		-0.0032	1657.77	3	7	1.1.1.1248.9	Winner
0	21.4	ESALNLPYHMPENK	Oxidation(M)@10		-0.0009	1657.78	3	8	1.1.1.1347.9	Winner
0	20.8	TVADSDESYMEK	Oxidation(M)@10		0.0043	1389.56	2	6	1.1.1.1041.17	Winner
0	20	ESALNLPYHMPENK	Oxidation(M)@10		0.002	1657.78	3	6	1.1.1.1388.8	Winner
0	19.7	ESALNLPYHMPENK	Oxidation(M)@10		-0.0018	1657.78	3	7	1.1.1.1367.10	Winner
0	19.7	ESALNLPYHMPENK	Oxidation(M)@10		-0.0013	1657.78	3	8	1.1.1.1341.10	Winner
0	25.9	TVADSDESYMEK	Oxidation(M)@10; Delta:H(4)C(2)(K)@12		0.0013	1417.59	2	9	1.1.1.1069.12	Winner
0	99	EIIDTANTTEMNSDHHSK	Oxidation(M)@11		-0.0017	2057.89	4	19	1.1.1.939.7	Winner
0	99	EIIDTANTTEMNSDHHSK	Oxidation(M)@11		-0.0017	2057.89	4	20	1.1.1.930.6	Winner
0	99	EIIDTANTTEMNSDHHSK	Oxidation(M)@11		-0.0017	2057.89	4	14	1.1.1.925.10	Winner
0	99	EIIDTANTTEMNSDHHSK	Oxidation(M)@11		-0.0017	2057.89	4	14	1.1.1.945.11	Winner
0	99	EIIDTANTTEMNSDHHSK	Oxidation(M)@11		-0.0044	2057.89	3	18	1.1.1.943.10	Winner
0	97.3	LPLASMDENAM	Oxidation(M)@11	cleaved M-D@C-term	-0.0016	1206.52	2	11	1.1.1.1371.10	Winner
0	72.5	EIIDTANTTEMNSDHHSK	Oxidation(M)@11		-0.0044	2057.89	4	10	1.1.1.920.10	Winner
0	60.1	EIIDTANTTEMNSDHHSK	Oxidation(M)@11		0.0008	2057.9	4	10	1.1.1.979.8	Winner
0	36.8	LPLASMDENAM	Oxidation(M)@11	cleaved M-D@C-term	-0.0016	1206.52	2	8	1.1.1.1379.9	Winner
0	2.1	LPLASMDENAM	Oxidation(M)@11	cleaved M-D@C-term	-0.002	1206.52	2	6	1.1.1.1366.14	Winner
0	99	EIIDTANTTEMNSDHHSK	Oxidation(M)@11; Deamidated(N)@12		0.0018	2058.88	4	16	1.1.1.964.8	Winner
0	99	EIIDTANTTEMNSDHHSK	Oxidation(M)@11; Deamidated(N)@12		0.0018	2058.88	4	14	1.1.1.959.10	Winner
0	99	EIIDTANTTEMNSDHHSK	Oxidation(M)@11; Deamidated(N)@12		0.0018	2058.88	4	17	1.1.1.954.7	Winner
0	99	EIIDTANTTEMNSDHHSK	Oxidation(M)@11; Deamidated(N)@12		0.0003	2058.88	3	18	1.1.1.949.12	Winner
0	97.1	EIIDTANTTEMNSDHHSK	Oxidation(M)@11; Deamidated(N)@12		0.0003	2058.88	3	11	1.1.1.969.15	Winner
0	99	LPLASMDENAMDANMDELLDLCTGK	Oxidation(M)@11; Oxidation(M)@15; Trioxidation(C)@22; Formyl(K)@25		0.019	2817.19	3	28	1.1.1.1915.4	Winner
0	99	LPLASMDENAMDANMDELLDLCTGK	Oxidation(M)@11; Oxidation(M)@15; Trioxidation(C)@22; Formyl(K)@25		0.019	2817.19	3	27	1.1.1.1910.5	Winner
0	99	ITAEEEEEIGEDSQFMILAK	Oxidation(M)@16		-0.0051	2297.06	3	24	1.1.1.1878.6	Winner
0	99	ITAEEEEEIGEDSQFMILAK	Oxidation(M)@16		-0.0051	2297.06	3	21	1.1.1.1868.8	Winner
0	99	ITAEEEEEIGEDSQFMILAK	Oxidation(M)@16		-0.0054	2297.06	3	31	1.1.1.3070.3	Winner
0	99	ITAEEEEEIGEDSQFMILAK	Oxidation(M)@16		-0.0018	2297.06	3	28	1.1.1.1790.3	Winner
0	99	ITAEEEEEIGEDSQFMILAK	Oxidation(M)@16		-0.0012	2297.06	3	23	1.1.1.1863.9	Winner
0	99	ITAEEEEEIGEDSQFMILAK	Oxidation(M)@16		-0.0021	2297.06	3	28	1.1.1.1785.4	Winner
0	99	ITAEEEEEIGEDSQFMILAK	Oxidation(M)@16		-0.0049	2297.06	3	22	1.1.1.1888.9	Winner
0	99	ITAEEEEEIGEDSQFMILAK	Oxidation(M)@16		-0.0049	2297.06	3	23	1.1.1.1883.6	Winner
0	99	ITAEEEEEIGEDSQFMILAK	Oxidation(M)@16		-0.0009	2297.06	3	28	1.1.1.1952.3	Winner
0	99	ITAEEEEEIGEDSQFMILAK	Oxidation(M)@16		0.0002	2297.06	3	24	1.1.1.1981.4	Winner
0	99	ITAEEEEEIGEDSQFMILAK	Oxidation(M)@16		0.0002	2297.06	3	24	1.1.1.1899.5	Winner
0	99	ITAEEEEEIGEDSQFMILAK	Oxidation(M)@16		0.0002	2297.06	3	26	1.1.1.1893.5	Winner
0	99	ITAEEEEEIGEDSQFMILAK	Oxidation(M)@16		0.0002	2297.06	3	30	1.1.1.1943.2	Winner
0	99	ITAEEEEEIGEDSQFMILAK	Oxidation(M)@16		0.0002	2297.06	3	29	1.1.1.2559.2	Winner
0	99	ITAEEEEEIGEDSQFMILAK	Oxidation(M)@16		0.0008	2297.06	3	29	1.1.1.1690.12	Winner
0	99	ITAEEEEEIGEDSQFMILAK	Oxidation(M)@16		0.0008	2297.06	3	28	1.1.1.1873.4	Winner
0	99	ITAEEEEEIGEDSQFMILAK	Oxidation(M)@16		0.0006	2297.06	3	30	1.1.1.2571.3	Winner
0	99	ITAEEEEEIGEDSQFMILAK	Oxidation(M)@16		0.0002	2297.06	3	22	1.1.1.1837.5	Winner
0	99	ITAEEEEEIGEDSQFMILAK	Oxidation(M)@16		0.0006	2297.06	3	24	1.1.1.1847.2	Winner
0	99	ITAEEEEEIGEDSQFMILAK	Oxidation(M)@16		-0.0007	2297.06	3	24	1.1.1.1852.5	Winner
0	99	ITAEEEEEIGEDSQFMILAK	Oxidation(M)@16		-0.0007	2297.06	3	22	1.1.1.1858.10	Winner
0	99	ITAEEEEEIGEDSQFMILAK	Oxidation(M)@16		-0.0009	2297.06	3	26	1.1.1.1842.4	Winner
0	99	ITAEEEEEIGEDSQFMILAK	Oxidation(M)@16		-0.0001	2297.06	3	27	1.1.1.2586.3	Winner
0	99	ITAEEEEEIGEDSQFMILAK	Oxidation(M)@16		0.0002	2297.06	3	26	1.1.1.1918.4	Winner
0	99	ITAEEEEEIGEDSQFMILAK	Oxidation(M)@16		-0.0001	2297.06	3	27	1.1.1.1905.4	Winner
0	99	ITAEEEEEIGEDSQFMILAK	Oxidation(M)@16		-0.0003	2297.06	3	18	1.1.1.1931.10	Winner
0	99	ITAEEEEEIGEDSQFMILAK	Oxidation(M)@16		-0.0001	2297.06	3	28	1.1.1.2415.2	Winner
0	99	ITAEEEEEIGEDSQFMILAK	Oxidation(M)@16		0.0021	2297.06	3	26	1.1.1.1715.11	Winner
0	99	ITAEEEEEIGEDSQFMILAK	Oxidation(M)@16		0.0021	2297.06	3	25	1.1.1.1759.5	Winner
0	99	ITAEEEEEIGEDSQFMILAK	Oxidation(M)@16		0.0021	2297.06	3	25	1.1.1.1764.9	Winner
0	99	ITAEEEEEIGEDSQFMILAK	Oxidation(M)@16		0.0021	2297.06	3	28	1.1.1.1832.4	Winner
0	99	ITAEEEEEIGEDSQFMILAK	Oxidation(M)@16		0.0021	2297.06	3	27	1.1.1.1827.5	Winner
0	99	ITAEEEEEIGEDSQFMILAK	Oxidation(M)@16		0.0021	2297.06	3	29	1.1.1.2377.2	Winner
0	99	ITAEEEEEIGEDSQFMILAK	Oxidation(M)@16		0.0017	2297.06	3	23	1.1.1.1812.4	Winner
0	99	ITAEEEEEIGEDSQFMILAK	Oxidation(M)@16		0.0015	2297.06	3	28	1.1.1.1710.9	Winner
0	99	ITAEEEEEIGEDSQFMILAK	Oxidation(M)@16		0.0017	2297.06	3	26	1.1.1.1817.3	Winner
0	99	ITAEEEEEIGEDSQFMILAK	Oxidation(M)@16		0.0017	2297.06	3	22	1.1.1.1675.12	Winner
0	99	ITAEEEEEIGEDSQFMILAK	Oxidation(M)@16		0.0017	2297.06	3	23	1.1.1.1730.11	Winner
0	99	ITAEEEEEIGEDSQFMILAK	Oxidation(M)@16		0.0024	2297.06	3	28	1.1.1.1780.7	Winner
0	99	ITAEEEEEIGEDSQFMILAK	Oxidation(M)@16		0.0035	2297.07	3	25	1.1.1.1754.8	Winner
0	99	ITAEEEEEIGEDSQFMILAK	Oxidation(M)@16		0.0033	2297.07	2	19	1.1.1.1684.11	Winner
0	99	ITAEEEEEIGEDSQFMILAK	Oxidation(M)@16		0.0063	2297.07	3	27	1.1.1.1749.10	Winner
0	99	ITAEEEEEIGEDSQFMILAK	Oxidation(M)@16		0.0063	2297.07	3	19	1.1.1.1751.8	Winner
0	99	ITAEEEEEIGEDSQFMILAK	Oxidation(M)@16		0.0032	2297.07	3	24	1.1.1.1744.15	Winner
0	99	ITAEEEEEIGEDSQFMILAK	Oxidation(M)@16		0.0024	2297.06	3	22	1.1.1.2277.3	Winner
0	99	ITAEEEEEIGEDSQFMILAK	Oxidation(M)@16		0.0024	2297.06	3	23	1.1.1.1774.8	Winner
0	99	ITAEEEEEIGEDSQFMILAK	Oxidation(M)@16		0.0026	2297.06	3	28	1.1.1.1822.4	Winner
0	99	ITAEEEEEIGEDSQFMILAK	Oxidation(M)@16		0.003	2297.06	3	29	1.1.1.1736.4	Winner
0	99	ITAEEEEEIGEDSQFMILAK	Oxidation(M)@16		0.0026	2297.06	3	26	1.1.1.1769.9	Winner
0	99	ITAEEEEEIGEDSQFMILAK	Oxidation(M)@16		0.0015	2297.06	3	27	1.1.1.1705.9	Winner
0	99	ITAEEEEEIGEDSQFMILAK	Oxidation(M)@16		0.0015	2297.06	3	16	1.1.1.1936.8	Winner
0	99	ITAEEEEEIGEDSQFMILAK	Oxidation(M)@16		0.0015	2297.06	3	23	1.1.1.1725.11	Winner
0	99	ITAEEEEEIGEDSQFMILAK	Oxidation(M)@16		0.0015	2297.06	3	24	1.1.1.1720.12	Winner
0	99	ITAEEEEEIGEDSQFMILAK	Oxidation(M)@16		0.0015	2297.06	3	18	1.1.1.1925.9	Winner
0	99	ITAEEEEEIGEDSQFMILAK	Oxidation(M)@16		0.0011	2297.06	3	28	1.1.1.1700.10	Winner
0	99	ITAEEEEEIGEDSQFMILAK	Oxidation(M)@16		0.0011	2297.06	3	29	1.1.1.1685.8	Winner
0	99	ITAEEEEEIGEDSQFMILAK	Oxidation(M)@16		0.0008	2297.06	3	25	1.1.1.1970.3	Winner
0	99	ITAEEEEEIGEDSQFMILAK	Oxidation(M)@16		0.0011	2297.06	3	28	1.1.1.1695.13	Winner
0	99	ITAEEEEEIGEDSQFMILAK	Oxidation(M)@16		0.0011	2297.06	3	29	1.1.1.1680.8	Winner
0	99	ITAEEEEEIGEDSQFMILAK	Oxidation(M)@16		0.0011	2297.06	3	28	1.1.1.1958.2	Winner
0	99	DMGTDGKEELKADVVPVTLAPK	Oxidation(M)@2	missed K-E@7; missed K-A@11	0.0008	2328.19	4	20	1.1.1.1460.9	Winner
0	99	DMGTDGKEELKADVVPVTLAPK	Oxidation(M)@2	missed K-E@7; missed K-A@11	-0.0043	2328.18	4	12	1.1.1.1513.5	Winner
0	99	DMGTDGKEELKADVVPVTLAPK	Oxidation(M)@2	missed K-E@7; missed K-A@11	-0.0031	2328.19	4	20	1.1.1.1466.5	Winner
0	99	DMGTDGKEELKADVVPVTLAPK	Oxidation(M)@2	missed K-E@7; missed K-A@11	-0.0031	2328.19	4	12	1.1.1.1480.7	Winner
0	99	DMGTDGKEELKADVVPVTLAPK	Oxidation(M)@2	missed K-E@7; missed K-A@11	-0.0031	2328.19	4	16	1.1.1.1475.5	Winner
0	99	DMGTDGKEELKADVVPVTLAPK	Oxidation(M)@2	missed K-E@7; missed K-A@11	-0.0026	2328.19	4	13	1.1.1.1508.6	Winner
0	99	DMGTDGKEELKADVVPVTLAPK	Oxidation(M)@2	missed K-E@7; missed K-A@11	-0.0031	2328.19	4	16	1.1.1.1485.7	Winner
0	99	DMGTDGKEELKADVVPVTLAPK	Oxidation(M)@2	missed K-E@7; missed K-A@11	-0.0038	2328.18	4	13	1.1.1.1527.8	Winner
0	99	DMGTDGKEELKADVVPVTLAPK	Oxidation(M)@2	missed K-E@7; missed K-A@11	-0.0036	2328.19	4	17	1.1.1.1465.4	Winner
0	99	DMGTDGKEELKADVVPVTLAPK	Oxidation(M)@2	missed K-E@7; missed K-A@11	-0.0038	2328.18	4	12	1.1.1.1520.8	Winner
0	99	DMGTDGKEELKADVVPVTLAPK	Oxidation(M)@2	missed K-E@7; missed K-A@11	0.0013	2328.19	4	25	1.1.1.1430.5	Winner
0	99	DMGTDGKEELKADVVPVTLAPK	Oxidation(M)@2	missed K-E@7; missed K-A@11	-0.0005	2328.19	3	32	1.1.1.1426.15	Winner
0	99	DMGTDGKEELKADVVPVTLAPK	Oxidation(M)@2	missed K-E@7; missed K-A@11	-0.0005	2328.19	3	28	1.1.1.1445.12	Winner
0	99	DMGTDGKEELKADVVPVTLAPK	Oxidation(M)@2	missed K-E@7; missed K-A@11	-0.0005	2328.19	3	30	1.1.1.1437.17	Winner
0	99	DMGTDGKEELKADVVPVTLAPK	Oxidation(M)@2	missed K-E@7; missed K-A@11	-0.0005	2328.19	3	29	1.1.1.1446.10	Winner
0	99	DMGTDGKEELKADVVPVTLAPK	Oxidation(M)@2	missed K-E@7; missed K-A@11	-0.0005	2328.19	3	32	1.1.1.1438.12	Winner
0	99	DMGTDGKEELKADVVPVTLAPK	Oxidation(M)@2	missed K-E@7; missed K-A@11	-0.0005	2328.19	3	32	1.1.1.1435.9	Winner
0	99	DMGTDGKEELKADVVPVTLAPK	Oxidation(M)@2	missed K-E@7; missed K-A@11	-0.0005	2328.19	3	30	1.1.1.1441.6	Winner
0	99	DMGTDGKEELKADVVPVTLAPK	Oxidation(M)@2	missed K-E@7; missed K-A@11	-0.0005	2328.19	3	10	1.1.1.1488.15	Winner
0	99	DMGTDGKEELKADVVPVTLAPK	Oxidation(M)@2	missed K-E@7; missed K-A@11	-0.0005	2328.19	3	30	1.1.1.1444.11	Winner
0	99	DMGTDGKEELKADVVPVTLAPK	Oxidation(M)@2	missed K-E@7; missed K-A@11	0.0001	2328.19	3	14	1.1.1.1481.19	Winner
0	99	DMGTDGKEELKADVVPVTLAPK	Oxidation(M)@2	missed K-E@7; missed K-A@11	0.0001	2328.19	3	24	1.1.1.1465.9	Winner
0	99	DMGTDGKEELKADVVPVTLAPK	Oxidation(M)@2	missed K-E@7; missed K-A@11	-0.0005	2328.19	3	14	1.1.1.1487.8	Winner
0	99	DMGTDGKEELKADVVPVTLAPK	Oxidation(M)@2	missed K-E@7; missed K-A@11	-0.0001	2328.19	3	30	1.1.1.1443.13	Winner
0	99	DMGTDGKEELKADVVPVTLAPK	Oxidation(M)@2	missed K-E@7; missed K-A@11	-0.0001	2328.19	3	23	1.1.1.1461.8	Winner
0	99	DMGTDGKEELKADVVPVTLAPK	Oxidation(M)@2	missed K-E@7; missed K-A@11	-0.001	2328.19	3	29	1.1.1.1455.10	Winner
0	99	DMGTDGKEELKADVVPVTLAPK	Oxidation(M)@2	missed K-E@7; missed K-A@11	-0.0007	2328.19	3	22	1.1.1.1458.10	Winner
0	99	DMGTDGKEELKADVVPVTLAPK	Oxidation(M)@2	missed K-E@7; missed K-A@11	-0.001	2328.19	3	13	1.1.1.1476.9	Winner
0	99	DMGTDGKEELKADVVPVTLAPK	Oxidation(M)@2	missed K-E@7; missed K-A@11	-0.001	2328.19	3	29	1.1.1.1452.9	Winner
0	99	DMGTDGKEELKADVVPVTLAPK	Oxidation(M)@2	missed K-E@7; missed K-A@11	-0.0024	2328.19	4	23	1.1.1.1448.7	Winner
0	99	DMGTDGKEELKADVVPVTLAPK	Oxidation(M)@2	missed K-E@7; missed K-A@11	-0.001	2328.19	3	25	1.1.1.1457.10	Winner
0	99	DMGTDGKEELKADVVPVTLAPK	Oxidation(M)@2	missed K-E@7; missed K-A@11	-0.0014	2328.19	3	21	1.1.1.1456.12	Winner
0	99	DMGTDGKEELKADVVPVTLAPK	Oxidation(M)@2	missed K-E@7; missed K-A@11	0.0013	2328.19	4	21	1.1.1.1454.9	Winner
0	99	DMGTDGKEELKADVVPVTLAPK	Oxidation(M)@2	missed K-E@7; missed K-A@11	0.0013	2328.19	4	24	1.1.1.1442.10	Winner
0	99	DMGTDGKEELKADVVPVTLAPK	Oxidation(M)@2	missed K-E@7; missed K-A@11	-0.0005	2328.19	3	20	1.1.1.1422.13	Winner
0	99	DMGTDGKEELKADVVPVTLAPK	Oxidation(M)@2	missed K-E@7; missed K-A@11	-0.0005	2328.19	3	24	1.1.1.1423.12	Winner
0	99	DMGTDGKEELKADVVPVTLAPK	Oxidation(M)@2	missed K-E@7; missed K-A@11	0.0013	2328.19	4	23	1.1.1.1436.7	Winner
0	99	DMGTDGKEELKADVVPVTLAPK	Oxidation(M)@2	missed K-E@7; missed K-A@11	-0.0005	2328.19	3	28	1.1.1.1424.8	Winner
0	99	DMGTDGKEELKADVVPVTLAPK	Oxidation(M)@2	missed K-E@7; missed K-A@11	-0.0005	2328.19	3	27	1.1.1.1459.7	Winner
0	99	DMGTDGKEELKADVVPVTLAPK	Oxidation(M)@2	missed K-E@7; missed K-A@11	0.0013	2328.19	4	21	1.1.1.1425.13	Winner
0	99	DMGTDGKEELKADVVPVTLAPK	Oxidation(M)@2	missed K-E@7; missed K-A@11	-0.0005	2328.19	3	32	1.1.1.1427.17	Winner
0	99	DMGTDGKEELKADVVPVTLAPK	Oxidation(M)@2	missed K-E@7; missed K-A@11	0.0018	2328.19	4	13	1.1.1.1490.5	Winner
0	99	DMGTDGKEELKADVVPVTLAPK	Oxidation(M)@2	missed K-E@7; missed K-A@11	0.0013	2328.19	4	12	1.1.1.1428.8	Winner
2	99	EMDKENNDGSSEIGK	Oxidation(M)@2	missed K-E@4	-0.0031	1667.69	3	17	1.1.1.767.2	Winner
0	99	PMVIQESK	Oxidation(M)@2	cleaved R-P@N-term	-0.0002	946.479	2	8	1.1.1.880.8	Winner
0	99	PMVIQESK	Oxidation(M)@2	cleaved R-P@N-term	0.002	946.481	2	10	1.1.1.869.5	Winner
0	99	PMVIQESK	Oxidation(M)@2	cleaved R-P@N-term	-0.0006	946.479	2	12	1.1.1.890.6	Winner
0	99	PMVIQESK	Oxidation(M)@2	cleaved R-P@N-term	0.0022	946.481	2	9	1.1.1.900.4	Winner
0	99	PMVIQESK	Oxidation(M)@2	cleaved R-P@N-term	-0.0006	946.479	2	11	1.1.1.852.8	Winner
0	99	PMVIQESK	Oxidation(M)@2	cleaved R-P@N-term	-0.0006	946.479	2	13	1.1.1.847.7	Winner
0	99	PMVIQESK	Oxidation(M)@2	cleaved R-P@N-term	-0.0006	946.479	2	13	1.1.1.842.4	Winner
0	99	PMVIQESK	Oxidation(M)@2	cleaved R-P@N-term	-0.0006	946.479	2	8	1.1.1.836.6	Winner
0	98.8	DMGTDGKEELKADVVPVTLAPK	Oxidation(M)@2	missed K-E@7; missed K-A@11	-0.001	2328.19	3	11	1.1.1.1470.14	Winner
0	98.7	EMDKENNDGSSEIGK	Oxidation(M)@2	missed K-E@4	-0.0005	1667.69	3	12	1.1.1.750.2	Winner
0	96.6	PMVIQESK	Oxidation(M)@2	cleaved R-P@N-term	-0.003	946.476	2	10	1.1.1.863.6	Winner
0	96.4	PMVIQESK	Oxidation(M)@2	cleaved R-P@N-term	0.0022	946.481	2	8	1.1.1.895.6	Winner
0	96.3	PMVIQESK	Oxidation(M)@2	cleaved R-P@N-term	-0.0004	946.479	2	9	1.1.1.858.4	Winner
0	94.6	PMVIQESK	Oxidation(M)@2	cleaved R-P@N-term	0.0024	946.482	2	9	1.1.1.905.3	Winner
0	94	PMVIQESK	Oxidation(M)@2	cleaved R-P@N-term	-0.0024	946.477	2	7	1.1.1.875.7	Winner
0	92.1	DMGTDGKEELKADVVPVTLAPK	Oxidation(M)@2	missed K-E@7; missed K-A@11	-0.0005	2328.19	3	9	1.1.1.1491.17	Winner
0	91.7	PMVIQESK	Oxidation(M)@2	cleaved R-P@N-term	-0.0002	946.479	2	9	1.1.1.964.6	Winner
0	90.8	PMVIQESK	Oxidation(M)@2	cleaved R-P@N-term	0.0024	946.482	2	8	1.1.1.930.3	Winner
0	84.8	DMGTDGKEELK	Oxidation(M)@2	missed K-E@7	-0.0004	1237.55	3	10	1.1.1.786.2	Winner
0	84.8	DMGTDGKEELKADVVPVTLAPK	Oxidation(M)@2	missed K-E@7; missed K-A@11	0.0001	2328.19	4	11	1.1.1.1533.5	Winner
0	83.9	DMGTDGKEELKADVVPVTLAPK	Oxidation(M)@2	missed K-E@7; missed K-A@11	-0.0038	2328.18	4	11	1.1.1.1558.5	Winner
0	82.7	DMGTDGKEELK	Oxidation(M)@2	missed K-E@7	-0.0004	1237.55	3	10	1.1.1.791.2	Winner
0	82.1	DMGTDGKEELKADVVPVTLAPK	Oxidation(M)@2	missed K-E@7; missed K-A@11	-0.0048	2328.18	4	8	1.1.1.1539.6	Winner
0	51.3	PMVIQESK	Oxidation(M)@2	cleaved R-P@N-term	0.0025	946.482	2	8	1.1.1.954.6	Winner
0	38.8	DMGTDGKEELKADVVPVTLAPK	Oxidation(M)@2	missed K-E@7; missed K-A@11	0.0008	2328.19	4	10	1.1.1.1503.7	Winner
0	27.7	DMGTDGKEELKADVVPVTLAPK	Oxidation(M)@2	missed K-E@7; missed K-A@11	0.0006	2328.19	4	9	1.1.1.1496.8	Winner
0	25.9	DMGTDGKEELKADVVPVTLAPK	Oxidation(M)@2	missed K-E@7; missed K-A@11	-0.0024	2328.19	4	8	1.1.1.1420.9	Winner
0	24.2	PMVIQESK	Oxidation(M)@2	cleaved R-P@N-term	-0.0002	946.479	2	6	1.1.1.969.7	Winner
0	21.8	PMVIQESK	Oxidation(M)@2	cleaved R-P@N-term	-0.0002	946.479	2	5	1.1.1.885.7	Winner
0	20.9	PMVIQESK	Oxidation(M)@2	cleaved R-P@N-term	0.0024	946.482	2	8	1.1.1.910.4	Winner
0	20.8	PMVIQESK	Oxidation(M)@2	cleaved R-P@N-term	0.0022	946.481	2	5	1.1.1.959.7	Winner
0	19.8	DMGTDGKEELKADVVPVTLAPK	Oxidation(M)@2	missed K-E@7; missed K-A@11	-0.0001	2328.19	3	8	1.1.1.1498.13	Winner
0	19.7	DMGTDGKEELKADVVPVTLAPK	Oxidation(M)@2	missed K-E@7; missed K-A@11	0.0018	2328.19	4	9	1.1.1.1501.10	Winner
0	19.6	DMGTDGKEELKADVVPVTLAPK	Oxidation(M)@2	missed K-E@7; missed K-A@11	-0.0043	2328.18	4	8	1.1.1.3072.7	Winner
0	68.8	DMGTDGKEELKADVVPVTLAPK	Oxidation(M)@2; Cation:K(E)@9	missed K-E@7; missed K-A@11	0.0001	2366.14	4	11	1.1.1.1431.6	Winner
0	52.1	EMDKENNDGSSEIGK	Oxidation(M)@2; Deamidated(N)@7	missed K-E@4	-0.0026	1668.68	3	10	1.1.1.790.3	Winner
0.03	99	DMGTDGKEELKADVV	Oxidation(M)@2; Dehydrated(D)@13	cleaved V-P@C-term; missed K-E@7; missed K-A@11	-0.0011	1603.74	2	16	1.1.1.1434.7	Winner
2	99	SFMTSPSPK	Oxidation(M)@3	cleaved P-S@N-term	0.0006	996.459	2	9	1.1.1.895.8	Winner
0	45.8	SFMTSPSPK	Oxidation(M)@3	cleaved P-S@N-term	0.0006	996.459	2	8	1.1.1.890.8	Winner
0	99	ENMEELLNLCSGK	Oxidation(M)@3; Cys->Dha(C)@10		-0.001	1460.68	2	15	1.1.1.1441.4	Winner
0	99	ENMEELLNLCSGK	Oxidation(M)@3; Cys->Dha(C)@10		-0.0003	1460.68	2	17	1.1.1.1453.10	Winner
0	99	ENMEELLNLCSGK	Oxidation(M)@3; Cys->Dha(C)@10		0.0022	1460.68	2	19	1.1.1.1459.5	Winner
0	99	ENMEELLNLCSGK	Oxidation(M)@3; Cys->Dha(C)@10		-0.0006	1460.68	2	14	1.1.1.1435.8	Winner
0	99	ENMEELLNLCSGK	Oxidation(M)@3; Cys->Dha(C)@10		-0.0006	1460.68	2	15	1.1.1.1429.7	Winner
0	99	ENMEELLNLCSGK	Oxidation(M)@3; Cys->Dha(C)@10		-0.0008	1460.68	2	14	1.1.1.1407.12	Winner
2	99	ENMEELLNLCSGK	Oxidation(M)@3; Cys->Dha(C)@10		-0.0014	1460.68	2	19	1.1.1.1464.6	Winner
0	99	ENMEELLNLCSGK	Oxidation(M)@3; Cys->Dha(C)@10		-0.0012	1460.68	2	17	1.1.1.1447.6	Winner
0	98.6	ENMEELLNLCSGK	Oxidation(M)@3; Cys->Dha(C)@10		-0.0008	1460.68	2	10	1.1.1.1401.10	Winner
0	98	ENMEELLNLCSGK	Oxidation(M)@3; Cys->Dha(C)@10		-0.0006	1460.68	2	10	1.1.1.1424.7	Winner
0	97.5	ENMEELLNLCSGK	Oxidation(M)@3; Cys->Dha(C)@10		-0.0008	1460.68	2	11	1.1.1.1412.7	Winner
0	77.8	ENMEELLNLCSGK	Oxidation(M)@3; Cys->Dha(C)@10		-0.0014	1460.68	2	9	1.1.1.1469.8	Winner
0	98	ENMEELLNLCSGK	Oxidation(M)@3; Dioxidation(C)@10		0.0033	1526.66	2	12	1.1.1.1441.5	Winner
0	97.2	ENMEELLNLCSGK	Oxidation(M)@3; Dioxidation(C)@10; Propionamide(K)@13		-0.021	1597.68	2	10	1.1.1.1547.11	Winner
0	99	ENMEELLNLCSGK	Oxidation(M)@3; Trioxidation(C)@10		-0.0025	1542.65	2	19	1.1.1.1457.9	Winner
0	99	ENMEELLNLCSGK	Oxidation(M)@3; Trioxidation(C)@10		-0.0024	1542.65	2	21	1.1.1.1451.7	Winner
0	99	ENMEELLNLCSGK	Oxidation(M)@3; Trioxidation(C)@10		-0.0024	1542.65	2	20	1.1.1.1445.11	Winner
0	99	ENMEELLNLCSGK	Oxidation(M)@3; Trioxidation(C)@10		-0.0022	1542.65	2	13	1.1.1.1463.15	Winner
0	99	ENMEELLNLCSGK	Oxidation(M)@3; Trioxidation(C)@10; Delta:H(4)C(2)(K)@13		-0.0182	1570.67	2	16	1.1.1.1583.13	Winner
0	99	ENMEELLNLCSGK	Oxidation(M)@3; Trioxidation(C)@10; Formyl(K)@13		0.0182	1570.67	2	16	1.1.1.1578.11	Winner
0	99	ENMEELLNLCSGK	Oxidation(M)@3; Trioxidation(C)@10; Formyl(K)@13		0.0182	1570.67	2	16	1.1.1.1589.14	Winner
0	99	ENMEELLNLCSGK	Oxidation(M)@3; Trioxidation(C)@10; Formyl(K)@13		0.0182	1570.67	2	16	1.1.1.1573.9	Winner
0	98.6	ENMEELLNLCSGK	Oxidation(M)@3; Trioxidation(C)@10; Formyl(K)@13		0.0178	1570.67	2	14	1.1.1.1568.9	Winner
2	99	GNAMALLK	Oxidation(M)@4	cleaved H-G@N-term	-0.004	832.444	2	9	1.1.1.975.3	Winner
0	99	SRPMVIQESK	Oxidation(M)@4	cleaved A-S@N-term	-0.0013	1189.61	2	12	1.1.1.862.7	Winner
0	99	SRPMVIQESK	Oxidation(M)@4	cleaved A-S@N-term	-0.0013	1189.61	2	13	1.1.1.868.6	Winner
0	37.9	GNAMALLK	Oxidation(M)@4	cleaved H-G@N-term	-0.004	832.444	2	8	1.1.1.980.3	Winner
0	37.9	KENMEELLNLCSGK	Oxidation(M)@4; Cys->Dha(C)@11	missed K-E@1	0.0054	1588.78	3	10	1.1.1.1308.10	Winner
0.62	98.9	ESSMGDPMEEALAL	Oxidation(M)@4; Oxidation(M)@8	cleaved L-C@C-term	-0.0002	1510.62	2	11	1.1.1.1503.13	Winner
0	28.6	ESSMGDPMEEALAL	Oxidation(M)@4; Oxidation(M)@8	cleaved L-C@C-term	-0.0002	1510.62	2	7	1.1.1.1498.12	Winner
2	99	ESSMGDPMEEALALCSGSFPTDKEEEDEEEEFGDFR	Oxidation(M)@4; Oxidation(M)@8; Cys->Dha(C)@15	missed K-E@23	-0.0037	4039.62	4	29	1.1.1.1857.5	Winner
0	99	ESSMGDPMEEALALCSGSFPTDKEEEDEEEEFGDFR	Oxidation(M)@4; Oxidation(M)@8; Cys->Dha(C)@15	missed K-E@23	-0.0034	4039.62	4	29	1.1.1.1847.4	Winner
0	99	ESSMGDPMEEALALCSGSFPTDKEEEDEEEEFGDFR	Oxidation(M)@4; Oxidation(M)@8; Propionamide(C)@15	missed K-E@23	0.0005	4144.65	4	30	1.1.1.1818.5	Winner
0	99	ESSMGDPMEEALALCSGSFPTDKEEEDEEEEFGDFR	Oxidation(M)@4; Oxidation(M)@8; Propionamide(C)@15	missed K-E@23	0.0005	4144.65	4	33	1.1.1.1813.5	Winner
2	99	KENMEELLNLCSGK	Oxidation(M)@4; Trioxidation(C)@11	missed K-E@1	-0.004	1670.75	2	18	1.1.1.1324.21	Winner
0	99	KENMEELLNLCSGK	Oxidation(M)@4; Trioxidation(C)@11	missed K-E@1	-0.004	1670.75	2	18	1.1.1.1329.12	Winner
0	99	KENMEELLNLCSGK	Oxidation(M)@4; Trioxidation(C)@11	missed K-E@1	-0.004	1670.75	2	19	1.1.1.1334.15	Winner
0	99	KENMEELLNLCSGK	Oxidation(M)@4; Trioxidation(C)@11	missed K-E@1	-0.0017	1670.75	2	15	1.1.1.1319.21	Winner
0	82.5	KENMEELLNLCSGK	Oxidation(M)@4; Trioxidation(C)@11; Formyl(K)@14	missed K-E@1	0.0202	1698.76	3	12	1.1.1.1454.8	Winner
2	99	ASRPMVIQESK	Oxidation(M)@5	cleaved N-A@N-term	-0.0019	1260.65	2	11	1.1.1.868.7	Winner
0	99	ASRPMVIQESK	Oxidation(M)@5	cleaved N-A@N-term	0	1260.65	3	12	1.1.1.852.3	Winner
0	99	ASRPMVIQESK	Oxidation(M)@5	cleaved N-A@N-term	0	1260.65	3	14	1.1.1.857.3	Winner
2	99	DEKEMDKENNDGSSEIGK	Oxidation(M)@5	missed K-E@3; missed K-E@7	-0.0053	2039.85	3	29	1.1.1.787.2	Winner
0	99	DEKEMDKENNDGSSEIGK	Oxidation(M)@5	missed K-E@3; missed K-E@7	-0.0053	2039.85	3	24	1.1.1.790.4	Winner
0	99	DEKEMDKENNDGSSEIGK	Oxidation(M)@5	missed K-E@3; missed K-E@7	-0.0053	2039.85	3	17	1.1.1.794.3	Winner
0	99	DEKEMDKENNDGSSEIGK	Oxidation(M)@5	missed K-E@3; missed K-E@7	-0.0033	2039.86	4	16	1.1.1.791.4	Winner
0	99	DEKEMDKENNDGSSEIGK	Oxidation(M)@5	missed K-E@3; missed K-E@7	-0.0053	2039.85	3	24	1.1.1.788.4	Winner
0	99	DEKEMDKENNDGSSEIGK	Oxidation(M)@5	missed K-E@3; missed K-E@7	-0.0053	2039.85	3	26	1.1.1.789.3	Winner
0	99	DEKEMDKENNDGSSEIGK	Oxidation(M)@5	missed K-E@3; missed K-E@7	-0.0033	2039.86	4	13	1.1.1.779.2	Winner
0	99	DEKEMDKENNDGSSEIGK	Oxidation(M)@5	missed K-E@3; missed K-E@7	-0.0033	2039.86	4	19	1.1.1.786.3	Winner
0	99	GPSFMTSPSPK	Oxidation(M)@5		-0.0005	1150.53	2	13	1.1.1.1026.12	Winner
0	99	GPSFMTSPSPK	Oxidation(M)@5		0.0003	1150.53	2	9	1.1.1.960.14	Winner
0	99	GPSFMTSPSPK	Oxidation(M)@5		0.0001	1150.53	2	15	1.1.1.997.6	Winner
0	99	GPSFMTSPSPK	Oxidation(M)@5		0.0001	1150.53	2	19	1.1.1.1014.14	Winner
0	99	GPSFMTSPSPK	Oxidation(M)@5		0.0001	1150.53	2	18	1.1.1.1008.18	Winner
0	99	GPSFMTSPSPK	Oxidation(M)@5		-0.0001	1150.53	2	16	1.1.1.1020.12	Winner
0	99	GPSFMTSPSPK	Oxidation(M)@5		0.0001	1150.53	2	18	1.1.1.1003.13	Winner
2	99	NTTEMNSDHHSK	Oxidation(M)@5	cleaved A-N@N-term	-0.0044	1415.57	2	13	1.1.1.935.4	Winner
0	95.6	GPSFMTSPSPK	Oxidation(M)@5		0.004	1150.54	2	9	1.1.1.1091.16	Winner
0	92.1	GPSFMTSPSPK	Oxidation(M)@5		0.0137	1150.55	2	8	1.1.1.1050.10	Winner
0.06	89.9	DSQFMILAK	Oxidation(M)@5	cleaved E-D@N-term	-0.0003	1067.53	2	7	1.1.1.1363.5	Winner
0	75.1	DSQFMILAK	Oxidation(M)@5	cleaved E-D@N-term	-0.0003	1067.53	2	7	1.1.1.1368.9	Winner
0	70.6	GPSFMTSPSPK	Oxidation(M)@5		0.0075	1150.54	2	8	1.1.1.1099.10	Winner
0	27.9	ASRPMVIQESK	Oxidation(M)@5	cleaved N-A@N-term	0	1260.65	3	8	1.1.1.862.3	Winner
0	21.7	GPSFMTSPSPK	Oxidation(M)@5		-0.0016	1150.53	2	6	1.1.1.1036.14	Winner
0	20.8	GPSFMTSPSPK	Oxidation(M)@5		0.0141	1150.55	2	6	1.1.1.1045.7	Winner
0	17.9	ASRPMVIQESK	Oxidation(M)@5	cleaved N-A@N-term	0	1260.65	3	7	1.1.1.847.3	Winner
0	99	DEKEMDKENNDGSSEIGK	Oxidation(M)@5; Deamidated(N)@10	missed K-E@3; missed K-E@7	0.0011	2040.84	4	18	1.1.1.806.2	Winner
0	99	DEKEMDKENNDGSSEIGK	Oxidation(M)@5; Deamidated(N)@10	missed K-E@3; missed K-E@7	0.0011	2040.84	4	13	1.1.1.812.4	Winner
0	99	DEKEMDKENNDGSSEIGK	Oxidation(M)@5; Deamidated(N)@9	missed K-E@3; missed K-E@7	-0.0005	2040.84	3	21	1.1.1.806.3	Winner
0	85.9	GPSFMTSPSPK	Oxidation(M)@5; Phospho(S)@7		0.0012	1230.5	2	9	1.1.1.1229.11	Winner
0	20.8	GPSFMTSPSPK	Oxidation(M)@5; Phospho(S)@7		0.0001	1230.5	2	6	1.1.1.1139.11	Winner
0	99	GPSFMTSPSPK	Oxidation(M)@5; Phospho(S)@9		0.0002	1230.5	2	11	1.1.1.1187.14	Winner
0	94.9	GPSFMTSPSPK	Oxidation(M)@5; Phospho(S)@9		0.0008	1230.5	2	9	1.1.1.1234.11	Winner
0	75.3	GPSFMTSPSPK	Oxidation(M)@5; Phospho(S)@9		-0.0016	1230.5	2	8	1.1.1.1240.15	Winner
0	61.9	GPSFMTSPSPK	Oxidation(M)@5; Phospho(S)@9		0.0001	1230.5	2	8	1.1.1.1193.14	Winner
0	58.1	GPSFMTSPSPK	Oxidation(M)@5; Phospho(S)@9		0.0001	1230.5	2	8	1.1.1.1224.12	Winner
0	22.6	GPSFMTSPSPK	Oxidation(M)@5; Phospho(S)@9		0.0001	1230.5	2	7	1.1.1.1145.16	Winner
0	99	NASRPMVIQESK	Oxidation(M)@6		0.0005	1374.69	3	13	1.1.1.880.5	Winner
0	99	NASRPMVIQESK	Oxidation(M)@6		0.0002	1374.69	3	15	1.1.1.868.3	Winner
0	99	NASRPMVIQESK	Oxidation(M)@6		0.0002	1374.69	3	15	1.1.1.862.5	Winner
0	99	NASRPMVIQESK	Oxidation(M)@6		0.0002	1374.69	3	15	1.1.1.874.5	Winner
0	99	RGPSFMTSPSPK	Oxidation(M)@6	missed R-G@1	0.002	1306.64	3	13	1.1.1.956.5	Winner
0	99	RGPSFMTSPSPK	Oxidation(M)@6	missed R-G@1	0.0017	1306.64	3	13	1.1.1.951.5	Winner
0	99	RGPSFMTSPSPK	Oxidation(M)@6	missed R-G@1	0.0017	1306.64	3	15	1.1.1.946.2	Winner
0	99	RGPSFMTSPSPK	Oxidation(M)@6	missed R-G@1	0.0017	1306.64	3	13	1.1.1.940.3	Winner
0	77.5	NASRPMVIQESK	Oxidation(M)@6		0.0002	1374.69	3	10	1.1.1.902.4	Winner
0	35.8	RGPSFMTSPSPK	Oxidation(M)@6	missed R-G@1	0.0175	1306.65	3	6	1.1.1.969.5	Winner
0	35.5	NASRPMVIQESK	Oxidation(M)@6		0.0002	1374.69	3	9	1.1.1.857.7	Winner
0	21.5	RGPSFMTSPSPK	Oxidation(M)@6	missed R-G@1	-0.0028	1306.63	2	6	1.1.1.934.16	Winner
0	84.5	LPLASMDENAMDANMDELLDLCTGK	Oxidation(M)@6; Carboxy(E)@17; Phospho(T)@23		0.0274	2849.18	3	12	1.1.1.1847.3	Winner
0	99	NASRPMVIQESK	Oxidation(M)@6; Deamidated(Q)@9		0.0013	1375.68	2	11	1.1.1.887.11	Winner
0	92.9	NASRPMVIQESK	Oxidation(M)@6; Deamidated(Q)@9		0.0013	1375.68	2	7	1.1.1.892.16	Winner
0	21.1	NASRPMVIQESK	Oxidation(M)@6; Deamidated(Q)@9		0.0019	1375.68	3	9	1.1.1.892.8	Winner
0	97.5	LPLASMDENAMDANMDELLDLCTGK	Oxidation(M)@6; Dioxidation(M)@11; Cation:Na(E)@17; Propionamide(C)@22		-0.0278	2850.18	3	14	1.1.1.1843.9	Winner
0	99	LPLASMDENAMDANM	Oxidation(M)@6; Dioxidation(M)@11; Oxidation(M)@15	cleaved M-D@C-term	0.0004	1685.66	2	14	1.1.1.1223.15	Winner
0	99	LPLASMDENAMDANM	Oxidation(M)@6; Dioxidation(M)@11; Oxidation(M)@15	cleaved M-D@C-term	0.0004	1685.66	2	19	1.1.1.1228.10	Winner
0	99	LPLASMDENAMDANMDELLDLCTGK	Oxidation(M)@6; Dioxidation(M)@11; Oxidation(M)@15; Cys->Dha(C)@22		0.0096	2739.2	3	22	1.1.1.1729.7	Winner
2	99	LPLASMDENAM	Oxidation(M)@6; Oxidation(M)@11	cleaved M-D@C-term	-0.0025	1222.52	2	14	1.1.1.1151.15	Winner
0	99	LPLASMDENAM	Oxidation(M)@6; Oxidation(M)@11	cleaved M-D@C-term	-0.0025	1222.52	2	12	1.1.1.1157.11	Winner
2	99	LPLASMDENAMD	Oxidation(M)@6; Oxidation(M)@11	cleaved D-A@C-term	0.0025	1337.55	2	9	1.1.1.1169.11	Winner
0	17.9	LPLASMDENAM	Oxidation(M)@6; Oxidation(M)@11	cleaved M-D@C-term	0.0039	1222.52	2	9	1.1.1.1164.9	Winner
0	99	LPLASMDENAMDANM	Oxidation(M)@6; Oxidation(M)@11; Oxidation(M)@15	cleaved M-D@C-term	0.0026	1669.67	2	15	1.1.1.1195.18	Winner
0	99	LPLASMDENAMDANM	Oxidation(M)@6; Oxidation(M)@11; Oxidation(M)@15	cleaved M-D@C-term	0.0026	1669.67	2	19	1.1.1.1206.9	Winner
2	99	LPLASMDENAMDANM	Oxidation(M)@6; Oxidation(M)@11; Oxidation(M)@15	cleaved M-D@C-term	0.0026	1669.67	2	18	1.1.1.1200.16	Winner
0	95.2	LPLASMDENAMDANMDELLDL	Oxidation(M)@6; Oxidation(M)@11; Oxidation(M)@15; Amidated@C-term	cleaved L-C@C-term	-0.0087	2367.02	3	13	1.1.1.1815.7	Winner
2	99	LPLASMDENAMDANMDELLDLCTGK	Oxidation(M)@6; Oxidation(M)@11; Oxidation(M)@15; Cys->Dha(C)@22		0.0045	2723.2	3	24	1.1.1.1702.9	Winner
0	99	LPLASMDENAMDANMDELLDLCTGK	Oxidation(M)@6; Oxidation(M)@11; Oxidation(M)@15; Cys->Dha(C)@22		0.0045	2723.2	3	27	1.1.1.1712.7	Winner
0	99	LPLASMDENAMDANMDELLDLCTGK	Oxidation(M)@6; Oxidation(M)@11; Oxidation(M)@15; Cys->Dha(C)@22		0.0045	2723.2	3	25	1.1.1.1707.8	Winner
0	99	LPLASMDENAMDANMDELLDLCTGK	Oxidation(M)@6; Oxidation(M)@11; Oxidation(M)@15; Cys->Dha(C)@22		0.0051	2723.2	3	19	1.1.1.1741.11	Winner
0	99	LPLASMDENAMDANMDELLDLCTGK	Oxidation(M)@6; Oxidation(M)@11; Oxidation(M)@15; Trioxidation(C)@22		0.0044	2805.17	3	26	1.1.1.1697.10	Winner
0	99	LPLASMDENAMDANMDELLDLCTGK	Oxidation(M)@6; Oxidation(M)@11; Oxidation(M)@15; Trioxidation(C)@22		0.0044	2805.17	3	27	1.1.1.1712.8	Winner
0	99	LPLASMDENAMDANMDELLDLCTGK	Oxidation(M)@6; Oxidation(M)@11; Oxidation(M)@15; Trioxidation(C)@22		0.0044	2805.17	3	29	1.1.1.1707.9	Winner
0	99	LPLASMDENAMDANMDELLDLCTGK	Oxidation(M)@6; Oxidation(M)@11; Oxidation(M)@15; Trioxidation(C)@22		0.0044	2805.17	3	28	1.1.1.1702.10	Winner
0	32.6	LPLASMDENAMDANMDELLDLCTGK	Oxidation(M)@6; Oxidation(M)@11; Phospho(T)@23; Formyl(K)@25		0.0274	2849.18	3	10	1.1.1.1852.6	Winner
0	21.5	RGPSFMTSPSPK	Oxidation(M)@6; Phospho(S)@8	missed R-G@1	-0.0019	1386.6	2	6	1.1.1.1055.10	Winner
0	20.8	RGPSFMTSPSPK	Oxidation(M)@6; Phospho(S)@8	missed R-G@1	0.0005	1386.6	2	5	1.1.1.1066.14	Winner
0.1	20.8	KRGPSFMTSPSPK	Oxidation(M)@7	missed K-R@1; missed R-G@2	-0.002	1434.73	3	8	1.1.1.866.3	Winner
0	99	NIDDASQMDLFHR	Oxidation(M)@8		-0.0025	1576.69	3	11	1.1.1.1299.5	Winner
0	99	NIDDASQMDLFHR	Oxidation(M)@8		-0.0025	1576.69	3	13	1.1.1.1279.7	Winner
0	99	NIDDASQMDLFHR	Oxidation(M)@8		-0.0025	1576.69	3	15	1.1.1.1284.5	Winner
0	99	NIDDASQMDLFHR	Oxidation(M)@8		-0.002	1576.69	3	13	1.1.1.1294.8	Winner
0	99	NIDDASQMDLFHR	Oxidation(M)@8		-0.0025	1576.69	3	10	1.1.1.1264.7	Winner
0	99	NIDDASQMDLFHR	Oxidation(M)@8		-0.0025	1576.69	3	13	1.1.1.1269.11	Winner
0	99	NIDDASQMDLFHR	Oxidation(M)@8		-0.0025	1576.69	3	16	1.1.1.1274.8	Winner
0	98.8	NIDDASQMDLFHR	Oxidation(M)@8		-0.0025	1576.69	3	12	1.1.1.1289.9	Winner
0.03	63.5	NIDDASQMDLF	Oxidation(M)@8	cleaved F-H@C-term	-0.0045	1283.53	2	8	1.1.1.1540.12	Winner
0	97.8	GSEQTTGAENEVETNALPVVSK	Oxidation(N)@10; Cation:K(E)@11		-0.0368	2313	3	15	1.1.1.1388.14	Winner
0	25.9	PMVIQESK	Oxidation(P)@1	cleaved R-P@N-term	0.0082	946.487	2	8	1.1.1.947.7	Winner
2	99	NASRPMVIQESK	Oxidation(P)@5; Oxidation(M)@6		-0.0013	1390.69	3	12	1.1.1.887.6	Winner
0	92.6	LSEPSLPIEDSQDLYNASPEPK	Oxidation(P)@7; Cation:K(E)@9		-0.0339	2482.08	3	13	1.1.1.1677.8	Winner
0	99	LSEPSLPIEDSQDLYNASPEPK	Oxidation(P)@7; Cation:K(E)@9; Oxidation(D)@10; Ammonia-loss(N)@16		-0.0058	2481.08	3	18	1.1.1.1651.10	Winner
0	99	LSEPSLPIEDSQDLYNASPEPK	Oxidation(P)@7; Cation:K(E)@9; Oxidation(D)@10; Ammonia-loss(N)@16		-0.0058	2481.08	3	21	1.1.1.1661.8	Winner
0	99	LSEPSLPIEDSQDLYNASPEPK	Phospho(S)@18; Oxidation(P)@21; Hypusine(K)@22		0.0088	2611.2	3	18	1.1.1.1727.6	Winner
0	87.9	LSEPSLPIEDSQDLYNASPEPK	Phospho(S)@18; Oxidation(P)@21; Hypusine(K)@22		0.0088	2611.2	3	13	1.1.1.1722.5	Winner
0	97.5	LSEPSLPIEDSQDLYNASPEPK	Phospho(S)@2; Dehydrated(S)@5; Dehydrated(S)@11		0.0216	2472.13	3	13	1.1.1.1653.13	Winner
0	99	FTSQDASTPASSELNK	Phospho(S)@3		-0.0007	1761.75	2	9	1.1.1.1241.16	Winner
0	99	SLSSDSTLLLFK	Phospho(S)@3		-0.0008	1389.68	2	19	1.1.1.2057.2	Winner
0	99	SLSSDSTLLLFK	Phospho(S)@3		-0.0011	1389.68	2	20	1.1.1.2018.3	Winner
0	99	SLSSDSTLLLFK	Phospho(S)@3		-0.0002	1389.68	2	19	1.1.1.2028.3	Winner
0	99	SLSSDSTLLLFK	Phospho(S)@3		-0.0008	1389.68	2	18	1.1.1.2013.6	Winner
0	99	SLSSDSTLLLFK	Phospho(S)@3		-0.0009	1389.68	2	21	1.1.1.2052.2	Winner
0	99	SLSSDSTLLLFK	Phospho(S)@3		-0.0008	1389.68	2	19	1.1.1.2083.4	Winner
0	99	SLSSDSTLLLFK	Phospho(S)@3		0.0008	1389.68	2	19	1.1.1.2093.4	Winner
0	99	SLSSDSTLLLFK	Phospho(S)@3		0.0007	1389.68	2	19	1.1.1.2206.2	Winner
0	99	SLSSDSTLLLFK	Phospho(S)@3		0.0011	1389.68	2	21	1.1.1.2286.2	Winner
0	99	SLSSDSTLLLFK	Phospho(S)@3		0.0003	1389.68	2	20	1.1.1.2100.3	Winner
0	99	SLSSDSTLLLFK	Phospho(S)@3		-0.0002	1389.68	2	20	1.1.1.2088.5	Winner
0	99	SLSSDSTLLLFK	Phospho(S)@3		-0.0002	1389.68	2	20	1.1.1.2047.4	Winner
0	99	SLSSDSTLLLFK	Phospho(S)@3		0.0001	1389.68	2	19	1.1.1.2008.5	Winner
0	99	SLSSDSTLLLFK	Phospho(S)@3		-0.0002	1389.68	2	20	1.1.1.2042.2	Winner
0	99	SLSSDSTLLLFK	Phospho(S)@3		-0.0003	1389.68	2	19	1.1.1.2128.2	Winner
0	99	SLSSDSTLLLFK	Phospho(S)@3		-0.0002	1389.68	2	20	1.1.1.2023.3	Winner
0	99	SLSSDSTLLLFK	Phospho(S)@3		-0.0002	1389.68	2	21	1.1.1.2033.3	Winner
0	99	SLSSDSTLLLFK	Phospho(S)@3		-0.0003	1389.68	2	19	1.1.1.2150.2	Winner
0	99	SLSSDSTLLLFK	Phospho(S)@3		-0.0005	1389.68	2	20	1.1.1.2073.4	Winner
0	99	SLSSDSTLLLFK	Phospho(S)@3		-0.0005	1389.68	2	19	1.1.1.2063.6	Winner
0	99	SLSSDSTLLLFK	Phospho(S)@3		-0.0005	1389.68	2	18	1.1.1.2068.6	Winner
0	99	SLSSDSTLLLFK	Phospho(S)@3		-0.0005	1389.68	2	19	1.1.1.2113.4	Winner
0	99	SLSSDSTLLLFK	Phospho(S)@3		-0.0005	1389.68	2	20	1.1.1.2108.4	Winner
0	99	SLSSDSTLLLFK	Phospho(S)@3		0.0003	1389.68	2	19	1.1.1.2162.3	Winner
0	99	SLSSDSTLLLFK	Phospho(S)@3		0.0001	1389.68	2	18	1.1.1.2003.5	Winner
0	99	SLSSDSTLLLFK	Phospho(S)@3		-0.0003	1389.68	2	20	1.1.1.2121.3	Winner
0	99	SLSSDSTLLLFK	Phospho(S)@3		-0.0003	1389.68	2	20	1.1.1.2133.2	Winner
0	99	SPSPGLFR	Phospho(S)@3		0.0006	939.422	2	12	1.1.1.1392.4	Winner
0	99	SPSPGLFR	Phospho(S)@3		0.0006	939.422	2	9	1.1.1.1478.2	Winner
0	99	SPSPGLFR	Phospho(S)@3		0.0006	939.422	2	11	1.1.1.1382.4	Winner
0	99	SPSPGLFR	Phospho(S)@3		0.0006	939.422	2	12	1.1.1.1377.6	Winner
0	99	SPSPGLFR	Phospho(S)@3		0.0003	939.422	2	11	1.1.1.1367.5	Winner
0	99	SPSPGLFR	Phospho(S)@3		0.0006	939.422	2	10	1.1.1.1428.3	Winner
0	99	SPSPGLFR	Phospho(S)@3		0.0003	939.422	2	8	1.1.1.1483.2	Winner
0	99	SPSPGLFR	Phospho(S)@3		0.0019	939.423	2	9	1.1.1.1488.3	Winner
0	99	SPSPGLFR	Phospho(S)@3		0.0006	939.422	2	10	1.1.1.1397.2	Winner
0	99	SPSPGLFR	Phospho(S)@3		0.0006	939.422	2	11	1.1.1.1408.4	Winner
0	99	SPSPGLFR	Phospho(S)@3		0.0002	939.422	2	10	1.1.1.1413.4	Winner
0	99	SPSPGLFR	Phospho(S)@3		0.0003	939.422	2	9	1.1.1.1357.3	Winner
0	99	SPSPGLFR	Phospho(S)@3		0.0002	939.422	2	9	1.1.1.1463.2	Winner
0	99	SPSPGLFR	Phospho(S)@3		0	939.421	2	9	1.1.1.1445.2	Winner
0	99	SPSPGLFR	Phospho(S)@3		0	939.421	2	10	1.1.1.1439.4	Winner
0	99	SPSPGLFR	Phospho(S)@3		0.0002	939.422	2	10	1.1.1.1418.4	Winner
0	99	SPSPGLFR	Phospho(S)@3		0.0003	939.422	2	10	1.1.1.1423.3	Winner
2	99	SPSPGLFR	Phospho(S)@3		0.0003	939.422	2	12	1.1.1.1387.4	Winner
0	98.9	SPSPGLFR	Phospho(S)@3		0.0008	939.422	2	7	1.1.1.1493.2	Winner
0	98.7	SPSPGLFR	Phospho(S)@3		0.0003	939.422	2	8	1.1.1.1550.4	Winner
0	98.6	SPSPGLFR	Phospho(S)@3		0.0008	939.422	2	7	1.1.1.1498.2	Winner
0	97.8	SPSPGLFR	Phospho(S)@3		0.0003	939.422	2	9	1.1.1.1362.5	Winner
0	97.8	SPSPGLFR	Phospho(S)@3		0.0025	939.424	2	9	1.1.1.1514.2	Winner
0	97.7	SPSPGLFR	Phospho(S)@3		0.0003	939.422	2	10	1.1.1.1372.7	Winner
0	94.2	SPSPGLFR	Phospho(S)@3		0	939.421	2	10	1.1.1.1451.2	Winner
0	92.5	SPSPGLFR	Phospho(S)@3		0.0006	939.422	2	9	1.1.1.1403.3	Winner
0	85.6	SPSPGLFR	Phospho(S)@3		0.0025	939.424	2	8	1.1.1.1509.2	Winner
0	75.7	SPSPGLFR	Phospho(S)@3		0.0008	939.422	2	6	1.1.1.1525.3	Winner
0	69.5	SPSPGLFR	Phospho(S)@3		0.0006	939.422	2	6	1.1.1.1503.2	Winner
0	44.2	SPSPGLFR	Phospho(S)@3		0.0003	939.422	2	8	1.1.1.1457.2	Winner
0	20.7	SPSPGLFR	Phospho(S)@3		0.0003	939.422	2	5	1.1.1.1540.3	Winner
0	19.6	SPSPGLFR	Phospho(S)@3		0.0006	939.422	2	5	1.1.1.1520.3	Winner
0	19.6	SPSPGLFR	Phospho(S)@3		0.0008	939.422	2	5	1.1.1.1530.3	Winner
0	19.6	SPSPGLFR	Phospho(S)@3		0.0003	939.422	2	5	1.1.1.1545.3	Winner
0	99	ESSMGDPMEEALALCSGSFPTDKEEEDEEEEFGDFR	Phospho(S)@3; Oxidation(M)@4; Oxidation(M)@8; Carboxy(E)@10	missed K-E@23	0.0009	4197.57	4	17	1.1.1.1821.6	Winner
0	99	SLSSDSTLLLFK	Phospho(S)@4		0.0011	1389.68	2	19	1.1.1.2174.2	Winner
0	68.8	LSEPSLPIEDSQDLYNASPEPK	Phospho(S)@5; Dehydrated(S)@11; Dehydrated(D)@13		0.0216	2472.13	3	11	1.1.1.1658.14	Winner
0	99	NFVFHTLSPVK	Phospho(S)@8		0.0026	1367.67	2	9	1.1.1.1678.11	Winner
0	99	NFVFHTLSPVK	Phospho(S)@8		0.002	1367.67	2	9	1.1.1.1658.9	Winner
0	99	NFVFHTLSPVK	Phospho(S)@8		0.002	1367.67	2	14	1.1.1.1663.5	Winner
0	99	NFVFHTLSPVK	Phospho(S)@8		-0.0005	1367.66	2	18	1.1.1.1574.8	Winner
0	99	NFVFHTLSPVK	Phospho(S)@8		-0.0014	1367.66	2	16	1.1.1.1605.10	Winner
0	99	NFVFHTLSPVK	Phospho(S)@8		-0.0027	1367.66	2	19	1.1.1.1595.8	Winner
0	99	NFVFHTLSPVK	Phospho(S)@8		-0.0036	1367.66	2	13	1.1.1.1716.7	Winner
0	99	NFVFHTLSPVK	Phospho(S)@8		-0.0007	1367.66	2	13	1.1.1.1636.8	Winner
0	99	NFVFHTLSPVK	Phospho(S)@8		-0.0002	1367.66	2	15	1.1.1.1630.6	Winner
0	99	NFVFHTLSPVK	Phospho(S)@8		-0.0005	1367.66	2	18	1.1.1.1579.9	Winner
0	99	NFVFHTLSPVK	Phospho(S)@8		-0.0005	1367.66	2	15	1.1.1.1668.8	Winner
0	99	NFVFHTLSPVK	Phospho(S)@8		-0.0007	1367.66	2	12	1.1.1.1648.4	Winner
0	99	NFVFHTLSPVK	Phospho(S)@8		-0.0005	1367.66	2	18	1.1.1.1590.8	Winner
0	99	NFVFHTLSPVK	Phospho(S)@8		-0.0007	1367.66	2	16	1.1.1.1642.7	Winner
0	99	NFVFHTLSPVK	Phospho(S)@8		-0.0007	1367.66	2	18	1.1.1.1620.9	Winner
0	99	NFVFHTLSPVK	Phospho(S)@8		-0.0005	1367.66	2	18	1.1.1.1584.6	Winner
0	99	NFVFHTLSPVK	Phospho(S)@8		-0.0011	1367.66	2	16	1.1.1.1615.7	Winner
0	99	NFVFHTLSPVK	Phospho(S)@8		-0.0013	1367.66	2	17	1.1.1.1600.10	Winner
0	99	NFVFHTLSPVK	Phospho(S)@8		-0.0014	1367.66	2	18	1.1.1.1610.7	Winner
0	99	NFVFHTLSPVK	Phospho(S)@8		-0.0007	1367.66	2	17	1.1.1.1569.12	Winner
0	99	NFVFHTLSPVK	Phospho(S)@8		-0.0008	1367.66	2	18	1.1.1.1564.5	Winner
0	99	NFVFHTLSPVK	Phospho(S)@8		-0.0002	1367.66	2	12	1.1.1.1673.10	Winner
0	99	NFVFHTLSPVK	Phospho(S)@8		-0.0002	1367.66	2	16	1.1.1.1625.6	Winner
0	99	NFVFHTLSPVKAEAAK	Phospho(S)@8	missed K-A@11	0.0006	1837.91	3	23	1.1.1.1480.9	Winner
0	99	NFVFHTLSPVKAEAAK	Phospho(S)@8	missed K-A@11	0.0006	1837.91	3	23	1.1.1.1510.9	Winner
0	99	NFVFHTLSPVKAEAAK	Phospho(S)@8	missed K-A@11	0.0006	1837.91	3	22	1.1.1.1515.8	Winner
0	99	NFVFHTLSPVKAEAAK	Phospho(S)@8	missed K-A@11	0.001	1837.91	3	23	1.1.1.1505.6	Winner
0	99	NFVFHTLSPVKAEAAK	Phospho(S)@8	missed K-A@11	0.0011	1837.91	3	22	1.1.1.1490.6	Winner
0	99	NFVFHTLSPVKAEAAK	Phospho(S)@8	missed K-A@11	0.0011	1837.91	3	22	1.1.1.1485.9	Winner
0	99	NFVFHTLSPVKAEAAK	Phospho(S)@8	missed K-A@11	0.0011	1837.91	3	24	1.1.1.1500.8	Winner
0	99	NFVFHTLSPVKAEAAK	Phospho(S)@8	missed K-A@11	0.0011	1837.91	3	20	1.1.1.1495.7	Winner
0	99	NFVFHTLSPVKAEAAK	Phospho(S)@8	missed K-A@11	-0.0007	1837.91	3	17	1.1.1.1535.11	Winner
0	99	NFVFHTLSPVKAEAAK	Phospho(S)@8	missed K-A@11	-0.0003	1837.91	3	16	1.1.1.1545.7	Winner
0	99	NFVFHTLSPVKAEAAK	Phospho(S)@8	missed K-A@11	-0.0007	1837.91	3	17	1.1.1.1550.5	Winner
0	99	NFVFHTLSPVKAEAAK	Phospho(S)@8	missed K-A@11	-0.0007	1837.91	3	22	1.1.1.1525.9	Winner
0	99	NFVFHTLSPVKAEAAK	Phospho(S)@8	missed K-A@11	-0.0003	1837.91	3	17	1.1.1.1530.9	Winner
0	99	NFVFHTLSPVKAEAAK	Phospho(S)@8	missed K-A@11	0	1837.91	3	15	1.1.1.1557.5	Winner
0	99	NFVFHTLSPVKAEAAK	Phospho(S)@8	missed K-A@11	0.0002	1837.91	3	22	1.1.1.1520.10	Winner
0	99	NFVFHTLSPVKAEAAK	Phospho(S)@8	missed K-A@11	0	1837.91	3	16	1.1.1.1567.6	Winner
0	99	NFVFHTLSPVKAEAAK	Phospho(S)@8	missed K-A@11	0	1837.91	3	15	1.1.1.1562.5	Winner
2	99	NFVFHTLSPVKAEAAK	Phospho(S)@8	missed K-A@11	-0.0007	1837.91	3	15	1.1.1.1540.10	Winner
0	98.7	NFVFHTLSPVK	Phospho(S)@8		-0.008	1367.66	2	8	1.1.1.1744.12	Winner
0	98.7	NFVFHTLSPVK	Phospho(S)@8		-0.0008	1367.66	2	11	1.1.1.1559.10	Winner
0	92.5	NFVFHTLSPVK	Phospho(S)@8		0.0023	1367.67	2	9	1.1.1.1689.5	Winner
0	92.5	NFVFHTLSPVK	Phospho(S)@8		0.002	1367.67	2	8	1.1.1.1653.9	Winner
0	89.2	NFVFHTLSPVK	Phospho(S)@8		-0.0007	1367.66	2	8	1.1.1.1632.7	Winner
0	84.8	NFVFHTLSPVKAEAAK	Phospho(S)@8	missed K-A@11	-0.0009	1837.91	3	13	1.1.1.1577.6	Winner
0	83	NFVFHTLSPVK	Phospho(S)@8		0.002	1367.67	2	10	1.1.1.1694.6	Winner
0	80.1	NFVFHTLSPVKAEAAK	Phospho(S)@8	missed K-A@11	-0.0051	1837.91	3	10	1.1.1.1589.10	Winner
0	57.2	NFVFHTLSPVK	Phospho(S)@8		0.0017	1367.67	3	10	1.1.1.1582.4	Winner
0	55.8	NFVFHTLSPVK	Phospho(S)@8		0.0017	1367.67	3	10	1.1.1.1572.3	Winner
0	49.1	NFVFHTLSPVK	Phospho(S)@8		0.0026	1367.67	2	9	1.1.1.1684.7	Winner
0	19.7	NFVFHTLSPVKAEAAK	Phospho(S)@8	missed K-A@11	0.0002	1837.91	3	8	1.1.1.1475.7	Winner
0	19.6	NFVFHTLSPVKAEAAK	Phospho(S)@8	missed K-A@11	-0.0042	1837.91	3	7	1.1.1.1597.9	Winner
0	99	ETQIITGSDESCR	Phospho(T)@2		-0.0049	1517.6	2	10	1.1.1.1108.18	Winner
0	96.5	ETQIITGSDESCRK	Phospho(T)@2	missed R-K@13	-0.0065	1645.7	2	8	1.1.1.1008.21	Winner
0	37.7	ETQIITGSDESCRK	Phospho(T)@2	missed R-K@13	-0.0065	1645.7	2	7	1.1.1.1002.16	Winner
0.56	72.6	RFTLDR	Phospho(T)@3	missed R-F@1	0.0015	886.408	2	8	1.1.1.1098.5	Winner
0	66.8	RFTLDR	Phospho(T)@3	missed R-F@1	0.0033	886.409	2	7	1.1.1.1086.4	Winner
0	34.8	RFTLDR	Phospho(T)@3	missed R-F@1	0.0015	886.408	2	8	1.1.1.1104.5	Winner
0	22.2	RFTLDR	Phospho(T)@3	missed R-F@1	0.0015	886.408	2	8	1.1.1.1092.2	Winner
0	21.3	RFTLDR	Phospho(T)@3	missed R-F@1	0.0005	886.407	2	5	1.1.1.1114.7	Winner
0	20.8	RFTLDR	Phospho(T)@3	missed R-F@1	0.0001	886.406	2	5	1.1.1.1124.4	Winner
0	99	QPSKLDEDDSCSLLTK	Propionamide(C)@11	missed K-L@4	-0.0008	1848.88	3	13	1.1.1.1241.13	Winner
0	99	QPSKLDEDDSCSLLTK	Propionamide(C)@11	missed K-L@4	-0.0008	1848.88	3	12	1.1.1.1231.16	Winner
0	37.9	QPSKLDEDDSCSLLTK	Propionamide(C)@11	missed K-L@4	-0.0008	1848.88	3	10	1.1.1.1236.15	Winner
0	20.9	QPSKLDEDDSCSLLTK	Propionamide(C)@11	missed K-L@4	-0.0008	1848.88	3	9	1.1.1.1226.15	Winner
0.52	99	KENMEELLNLCSGKFTSQDASTPASSELNK	Propionamide(C)@11; Phospho(S)@12; Propionamide(K)@14; Phospho(S)@17	missed K-E@1; missed K-F@14	-0.0114	3572.53	4	15	1.1.1.1112.18	Winner
0	99	ETQIITGSDESCR	Propionamide(C)@12		0.0025	1508.68	2	22	1.1.1.1050.14	Winner
0	99	ETQIITGSDESCR	Propionamide(C)@12		0.0025	1508.68	2	16	1.1.1.1065.13	Winner
0	99	ETQIITGSDESCR	Propionamide(C)@12		0.0025	1508.68	2	19	1.1.1.1060.12	Winner
0	99	ETQIITGSDESCR	Propionamide(C)@12		0.0025	1508.68	2	13	1.1.1.1045.11	Winner
0	99	ETQIITGSDESCR	Propionamide(C)@12		0.0026	1508.68	2	12	1.1.1.1070.12	Winner
0	99	ETQIITGSDESCR	Propionamide(C)@12		0.0025	1508.68	2	21	1.1.1.1055.12	Winner
0	99	ETQIITGSDESCRK	Propionamide(C)@12	missed R-K@13	-0.0012	1636.77	3	13	1.1.1.966.12	Winner
0	99	ETQIITGSDESCRK	Propionamide(C)@12	missed R-K@13	-0.0012	1636.77	3	14	1.1.1.956.11	Winner
0	99	ETQIITGSDESCRK	Propionamide(C)@12	missed R-K@13	0.0017	1636.77	2	17	1.1.1.951.14	Winner
0	99	ETQIITGSDESCRK	Propionamide(C)@12	missed R-K@13	0.0015	1636.77	2	12	1.1.1.946.10	Winner
0	99	ETQIITGSDESCRK	Propionamide(C)@12	missed R-K@13	-0.0012	1636.77	3	14	1.1.1.950.9	Winner
0	99	ETQIITGSDESCRK	Propionamide(C)@12	missed R-K@13	-0.0012	1636.77	3	15	1.1.1.961.11	Winner
0	85.7	ETQIITGSDESCRK	Propionamide(C)@12	missed R-K@13	-0.001	1636.77	3	11	1.1.1.971.8	Winner
0	37.5	ETQIITGSDESCRK	Propionamide(C)@12	missed R-K@13	-0.0012	1636.77	3	10	1.1.1.943.9	Winner
0	33.9	ETQIITGSDESCRK	Propionamide(C)@12; Deamidated(R)@13	missed R-K@13	0.0008	1637.76	3	11	1.1.1.999.8	Winner
0	99	ETQIITGSDESCR	Propionamide(C)@12; Dioxidation(R)@13		-0.0157	1540.65	2	12	1.1.1.1125.9	Winner
0	99	ETQIITGSDESCR	Propionamide(C)@12; Dioxidation(R)@13		-0.0157	1540.65	2	11	1.1.1.1132.13	Winner
2	99	NQEDDVEQPFNDSGCLLVDK	Propionamide(C)@15		-0.0014	2335.03	3	19	1.1.1.1586.13	Winner
0	99	NQEDDVEQPFNDSGCLLVDK	Propionamide(C)@15		-0.0014	2335.03	3	16	1.1.1.1592.21	Winner
0	99	SETDENSGKQPSKLDEDDSCSLLTK	Propionamide(C)@20	missed K-Q@9; missed K-L@13	0.0011	2796.26	4	18	1.1.1.1205.13	Winner
0	99	SETDENSGKQPSKLDEDDSCSLLTK	Propionamide(C)@20	missed K-Q@9; missed K-L@13	0.0011	2796.26	4	18	1.1.1.1199.20	Winner
0	99	SETDENSGKQPSKLDEDDSCSLLTK	Propionamide(C)@20	missed K-Q@9; missed K-L@13	0.0011	2796.26	4	13	1.1.1.1194.18	Winner
0.01	92.1	QSDIRPSPGDSSVLQQESNFLGNNHSEECQ	Propionamide(C)@29	cleaved Q-V@C-term	-0.0018	3372.49	4	12	1.1.1.1541.9	Winner
0	99	LDEDDSCSLLTK	Propionamide(C)@7		-0.0026	1408.64	2	21	1.1.1.1282.16	Winner
0	99	LDEDDSCSLLTK	Propionamide(C)@7		-0.0026	1408.64	2	18	1.1.1.1287.14	Winner
0	99	LDEDDSCSLLTK	Propionamide(C)@7		-0.0026	1408.64	2	15	1.1.1.1277.19	Winner
0	99	LDEDDSCSLLTK	Propionamide(C)@7		-0.0029	1408.64	2	13	1.1.1.1292.11	Winner
0	65.4	GSEQTTGAENEVETNALPVVSK	Propionamide@N-term; Phospho(S)@2; Deamidated(N)@10		-0.0233	2411.05	3	10	1.1.1.1399.14	Winner
0	99	ENMEELLNLCSGK	Trioxidation(C)@10		0.0003	1526.66	2	19	1.1.1.1718.5	Winner
0	99	ENMEELLNLCSGK	Trioxidation(C)@10		0.0003	1526.66	2	19	1.1.1.1713.5	Winner
0	99	ENMEELLNLCSGK	Trioxidation(C)@10		0.0003	1526.66	2	16	1.1.1.1723.7	Winner
0	99	ENMEELLNLCSGK	Trioxidation(C)@10; Formyl(K)@13		0.0177	1554.67	2	16	1.1.1.1839.3	Winner
0	99	ENMEELLNLCSGK	Trioxidation(C)@10; Formyl(K)@13		0.0179	1554.67	2	15	1.1.1.1829.4	Winner
0	99	ENMEELLNLCSGK	Trioxidation(C)@10; Formyl(K)@13		0.0177	1554.67	2	15	1.1.1.1834.6	Winner
0	97.8	ENMEELLNLCSGK	Trioxidation(C)@10; Formyl(K)@13		0.0177	1554.67	2	14	1.1.1.1845.5	Winner
2	99	QPSKLDEDDSCSLLTK	Trioxidation(C)@11	missed K-L@4	0.0026	1825.83	2	11	1.1.1.1231.19	Winner
0	99	QPSKLDEDDSCSLLTK	Trioxidation(C)@11	missed K-L@4	0.0026	1825.83	2	13	1.1.1.1236.18	Winner
0	99	QPSKLDEDDSCSLLTK	Trioxidation(C)@11	missed K-L@4	0.0026	1825.83	2	9	1.1.1.1226.16	Winner
0	99	ETQIITGSDESCR	Trioxidation(C)@12		0.0002	1485.63	2	13	1.1.1.1075.19	Winner
0	99	ETQIITGSDESCR	Trioxidation(C)@12		0.0021	1485.63	2	12	1.1.1.1060.11	Winner
0	99	ETQIITGSDESCR	Trioxidation(C)@12		0.0021	1485.63	2	13	1.1.1.1070.11	Winner
0	99	ETQIITGSDESCR	Trioxidation(C)@12		0.0021	1485.63	2	13	1.1.1.1065.12	Winner
0	99	ETQIITGSDESCRK	Trioxidation(C)@12	missed R-K@13	0.0032	1613.72	2	18	1.1.1.968.12	Winner
0	99	ETQIITGSDESCRK	Trioxidation(C)@12	missed R-K@13	0.0032	1613.72	2	19	1.1.1.973.14	Winner
0	99	ETQIITGSDESCRK	Trioxidation(C)@12	missed R-K@13	0.0032	1613.72	2	21	1.1.1.978.13	Winner
0	99	ETQIITGSDESCRK	Trioxidation(C)@12	missed R-K@13	0.0032	1613.72	2	15	1.1.1.983.15	Winner
0	99	ETQIITGSDESCR	Trioxidation(C)@12; Dimethyl(R)@13		-0.0152	1513.64	2	16	1.1.1.1143.19	Winner
0	99	ETQIITGSDESCR	Trioxidation(C)@12; Dimethyl(R)@13		-0.0152	1513.64	2	16	1.1.1.1133.14	Winner
0	99	ETQIITGSDESCR	Trioxidation(C)@12; Dimethyl(R)@13		-0.0149	1513.64	2	13	1.1.1.1148.16	Winner
0	99	ETQIITGSDESCRK	Trioxidation(C)@12; Formyl(K)@14	missed R-K@13	0.018	1641.73	3	15	1.1.1.1025.6	Winner
0	99	SETDENSGKQPSKLDEDDSCSLLTK	Trioxidation(C)@20	missed K-Q@9; missed K-L@13	0.0084	2773.22	3	26	1.1.1.1192.13	Winner
0	99	SETDENSGKQPSKLDEDDSCSLLTK	Trioxidation(C)@20	missed K-Q@9; missed K-L@13	0.0084	2773.22	3	25	1.1.1.1186.9	Winner
0	99	SETDENSGKQPSKLDEDDSCSLLTK	Trioxidation(C)@20	missed K-Q@9; missed K-L@13	0.0084	2773.22	3	13	1.1.1.1197.11	Winner
0	99	PTCHGNAMALLK	Trioxidation(C)@3	cleaved R-P@N-term	-0.0036	1302.6	2	9	1.1.1.1310.11	Winner
0	99	PTCHGNAMALLK	Trioxidation(C)@3; Dioxidation(M)@8	cleaved R-P@N-term	0.002	1334.6	2	16	1.1.1.1115.10	Winner
0	99	PTCHGNAMALLK	Trioxidation(C)@3; Dioxidation(M)@8	cleaved R-P@N-term	0.002	1334.6	2	13	1.1.1.1105.13	Winner
0	99	PTCHGNAMALLK	Trioxidation(C)@3; Dioxidation(M)@8	cleaved R-P@N-term	0.002	1334.6	2	12	1.1.1.1110.12	Winner
0	99	PTCHGNAMALLK	Trioxidation(C)@3; Oxidation(M)@8	cleaved R-P@N-term	0.0022	1318.6	2	20	1.1.1.1077.17	Winner
0	99	PTCHGNAMALLK	Trioxidation(C)@3; Oxidation(M)@8	cleaved R-P@N-term	0.0003	1318.6	2	13	1.1.1.1062.15	Winner
0	99	PTCHGNAMALLK	Trioxidation(C)@3; Oxidation(M)@8	cleaved R-P@N-term	0.0022	1318.6	2	18	1.1.1.1067.12	Winner
0	99	PTCHGNAMALLK	Trioxidation(C)@3; Oxidation(M)@8	cleaved R-P@N-term	0.0022	1318.6	2	18	1.1.1.1072.14	Winner
0	99	PTCHGNAMALLK	Trioxidation(C)@3; Oxidation(M)@8	cleaved R-P@N-term	0.0022	1318.6	2	18	1.1.1.1082.16	Winner
0	99	LDEDDSCSLLTK	Trioxidation(C)@7		0.0057	1385.59	2	10	1.1.1.1272.17	Winner
0	99	LDEDDSCSLLTK	Trioxidation(C)@7		-0.0006	1385.59	2	12	1.1.1.1277.18	Winner
0	99	AALSDHNPSAPR		cleaved L-A@N-term	0.0003	1234.61	2	15	1.1.1.1027.10	Winner
0	99	AALSDHNPSAPR		cleaved L-A@N-term	0.0005	1234.61	2	12	1.1.1.1021.10	Winner
2	99	AALSDHNPSAPR		cleaved L-A@N-term	0.0003	1234.61	2	12	1.1.1.1034.18	Winner
2	99	ADGDLHSDGPGR		cleaved L-A@N-term	0.0011	1195.52	2	15	1.1.1.1092.9	Winner
0	99	ADGDLHSDGPGR		cleaved L-A@N-term	0.0014	1195.52	2	15	1.1.1.1080.12	Winner
0	99	ADGDLHSDGPGR		cleaved L-A@N-term	0.0014	1195.52	2	15	1.1.1.1086.12	Winner
0	99	ADGDLHSDGPGR		cleaved L-A@N-term	0.0014	1195.52	2	8	1.1.1.1075.16	Winner
0	99	ADVVPVTLAPK			0.0004	1108.65	2	11	1.1.1.1348.7	Winner
2	99	ADVVPVTLAPK			0	1108.65	2	16	1.1.1.1373.9	Winner
0	99	ADVVPVTLAPK			0.0002	1108.65	2	17	1.1.1.1358.7	Winner
0	99	ADVVPVTLAPK			0.0002	1108.65	2	14	1.1.1.1378.7	Winner
0	99	ADVVPVTLAPK			0.0002	1108.65	2	15	1.1.1.1363.7	Winner
0	99	ADVVPVTLAPK			0.0002	1108.65	2	16	1.1.1.1353.6	Winner
0	99	ADVVPVTLAPK			0.0002	1108.65	2	16	1.1.1.1368.10	Winner
0	99	AGQTVNVNVIVK			-0.0004	1240.71	2	12	1.1.1.1338.8	Winner
0	99	AGQTVNVNVIVK			-0.0004	1240.71	2	15	1.1.1.1328.17	Winner
2	99	AGQTVNVNVIVK			-0.0004	1240.71	2	14	1.1.1.1333.11	Winner
0	99	AGQTVNVNVIVK			-0.0003	1240.71	2	14	1.1.1.1323.19	Winner
0	99	AGQTVNVNVIVK			0.0022	1240.72	2	13	1.1.1.1343.4	Winner
0	99	AGQTVNVNVIVK			0.0022	1240.72	2	12	1.1.1.1348.12	Winner
0	99	AGQTVNVNVIVK			-0.0011	1240.71	2	12	1.1.1.1313.16	Winner
0	99	AGQTVNVNVIVK			-0.0011	1240.71	2	13	1.1.1.1318.18	Winner
0	99	ALEGEGPQNPEETDEKVEEPEQQNK		cleaved H-A@N-term; missed K-V@16	0.007	2823.28	3	16	1.1.1.1152.13	Winner
2	99	ALEGEGPQNPEETDEKVEEPEQQNK		cleaved H-A@N-term; missed K-V@16	0.0075	2823.28	3	31	1.1.1.1137.16	Winner
0	99	ALEGEGPQNPEETDEKVEEPEQQNK		cleaved H-A@N-term; missed K-V@16	0.0075	2823.28	3	33	1.1.1.1142.15	Winner
0	99	ALEGEGPQNPEETDEKVEEPEQQNK		cleaved H-A@N-term; missed K-V@16	0.0075	2823.28	3	26	1.1.1.1132.16	Winner
0	99	ALEGEGPQNPEETDEKVEEPEQQNK		cleaved H-A@N-term; missed K-V@16	0.0075	2823.28	3	22	1.1.1.1147.15	Winner
2	99	ALSDHNPSAPR		cleaved A-A@N-term	-0.0017	1163.57	2	15	1.1.1.1028.12	Winner
0	99	ALSDHNPSAPR		cleaved A-A@N-term	-0.0017	1163.57	2	10	1.1.1.1034.16	Winner
0	99	ASLVSSASK			0.0001	848.46	2	11	1.1.1.848.2	Winner
0	99	ASLVSSASK			0.0001	848.46	2	11	1.1.1.837.2	Winner
0	99	ASLVSSASK			0.0001	848.46	2	11	1.1.1.843.2	Winner
0	99	ASLVSSASK			0.0004	848.461	2	9	1.1.1.863.2	Winner
0	99	ASLVSSASK			0.0004	848.461	2	12	1.1.1.853.2	Winner
0	99	ASLVSSASK			0.0004	848.461	2	11	1.1.1.858.2	Winner
2	99	ASTPASSELNK		cleaved D-A@N-term	-0.0006	1103.55	2	9	1.1.1.875.12	Winner
0	99	AVGFLSVPK			0.001	916.539	2	13	1.1.1.1465.2	Winner
0	99	AVGFLSVPK			0.001	916.539	2	12	1.1.1.1470.3	Winner
0	99	AVGFLSVPK			0.001	916.539	2	13	1.1.1.1448.2	Winner
0	99	AVGFLSVPK			0.001	916.539	2	14	1.1.1.1436.2	Winner
0	99	AVGFLSVPK			0.001	916.539	2	13	1.1.1.1454.2	Winner
0	99	AVGFLSVPK			0.001	916.539	2	13	1.1.1.1460.2	Winner
0	99	AVGFLSVPK			0.0012	916.539	2	9	1.1.1.1475.2	Winner
0	99	AVGFLSVPK			0.0007	916.539	2	9	1.1.1.1490.2	Winner
0	99	AVGFLSVPK			0.0007	916.539	2	11	1.1.1.1430.2	Winner
0	99	AVGFLSVPK			0.001	916.539	2	8	1.1.1.1480.3	Winner
2	99	AVGFLSVPK			0.001	916.539	2	15	1.1.1.1442.3	Winner
0	99	AVGFLSVPK			0.0008	916.539	2	9	1.1.1.1495.3	Winner
2	99	DASTPASSELNK		cleaved Q-D@N-term	0.0037	1218.58	2	9	1.1.1.942.12	Winner
0	99	DEKEMDKENNDGSSEIGK		missed K-E@3; missed K-E@7	0.0009	2023.87	4	10	1.1.1.880.11	Winner
0	99	DLVKNEELEIQEK		missed K-N@4	-0.0004	1585.82	3	14	1.1.1.1354.4	Winner
0	99	DLVKNEELEIQEK		missed K-N@4	-0.001	1585.82	3	20	1.1.1.1339.6	Winner
0	99	DLVKNEELEIQEK		missed K-N@4	-0.001	1585.82	3	9	1.1.1.1410.6	Winner
0	99	DLVKNEELEIQEK		missed K-N@4	-0.001	1585.82	3	14	1.1.1.1359.6	Winner
0	99	DLVKNEELEIQEK		missed K-N@4	-0.001	1585.82	3	11	1.1.1.1393.4	Winner
0	99	DLVKNEELEIQEK		missed K-N@4	-0.0024	1585.82	3	14	1.1.1.1309.7	Winner
0	99	DLVKNEELEIQEK		missed K-N@4	-0.0026	1585.82	3	20	1.1.1.1319.10	Winner
2	99	DLVKNEELEIQEK		missed K-N@4	-0.001	1585.82	3	20	1.1.1.1324.12	Winner
0	99	DLVKNEELEIQEK		missed K-N@4	-0.0008	1585.82	3	18	1.1.1.1344.9	Winner
0	99	DLVKNEELEIQEK		missed K-N@4	-0.0004	1585.82	3	18	1.1.1.1349.6	Winner
0	99	DLVKNEELEIQEK		missed K-N@4	-0.0024	1585.82	3	18	1.1.1.1314.10	Winner
0	99	DLVKNEELEIQEK		missed K-N@4	-0.001	1585.82	3	19	1.1.1.1334.11	Winner
0	99	DLVKNEELEIQEK		missed K-N@4	-0.001	1585.82	3	20	1.1.1.1329.7	Winner
0	99	DMGTDGKEELK		missed K-E@7	-0.001	1221.55	2	16	1.1.1.904.7	Winner
2	99	DMGTDGKEELK		missed K-E@7	-0.001	1221.55	2	15	1.1.1.909.11	Winner
0	99	DMGTDGKEELK		missed K-E@7	0.0019	1221.56	2	14	1.1.1.899.10	Winner
0	99	DMGTDGKEELKADVVPVTLAPK		missed K-E@7; missed K-A@11	0.001	2312.19	4	17	1.1.1.1518.6	Winner
0	99	DMGTDGKEELKADVVPVTLAPK		missed K-E@7; missed K-A@11	0.0008	2312.19	4	18	1.1.1.2566.2	Winner
0	99	DMGTDGKEELKADVVPVTLAPK		missed K-E@7; missed K-A@11	0.0003	2312.19	4	21	1.1.1.1498.7	Winner
0	99	DMGTDGKEELKADVVPVTLAPK		missed K-E@7; missed K-A@11	-0.0003	2312.19	3	10	1.1.1.1520.14	Winner
0	99	DMGTDGKEELKADVVPVTLAPK		missed K-E@7; missed K-A@11	-0.0003	2312.19	3	20	1.1.1.1505.8	Winner
0	99	DMGTDGKEELKADVVPVTLAPK		missed K-E@7; missed K-A@11	-0.0002	2312.19	4	13	1.1.1.1538.5	Winner
0	99	DMGTDGKEELKADVVPVTLAPK		missed K-E@7; missed K-A@11	-0.0003	2312.19	3	15	1.1.1.1521.7	Winner
0	99	DMGTDGKEELKADVVPVTLAPK		missed K-E@7; missed K-A@11	-0.0003	2312.19	3	19	1.1.1.1514.5	Winner
0	99	DMGTDGKEELKADVVPVTLAPK		missed K-E@7; missed K-A@11	-0.0005	2312.19	4	13	1.1.1.1528.4	Winner
0	99	DMGTDGKEELKADVVPVTLAPK		missed K-E@7; missed K-A@11	-0.0005	2312.19	3	21	1.1.1.1500.11	Winner
0	99	DMGTDGKEELKADVVPVTLAPK		missed K-E@7; missed K-A@11	-0.0003	2312.19	3	21	1.1.1.1506.10	Winner
0	99	DMGTDGKEELKADVVPVTLAPK		missed K-E@7; missed K-A@11	-0.0003	2312.19	3	19	1.1.1.1507.8	Winner
0	99	DMGTDGKEELKADVVPVTLAPK		missed K-E@7; missed K-A@11	-0.0002	2312.19	4	24	1.1.1.1493.8	Winner
0	99	DMGTDGKEELKADVVPVTLAPK		missed K-E@7; missed K-A@11	0.0003	2312.19	4	17	1.1.1.1508.5	Winner
0	99	DMGTDGKEELKADVVPVTLAPK		missed K-E@7; missed K-A@11	0.0003	2312.19	4	17	1.1.1.1513.4	Winner
0	99	DMGTDGKEELKADVVPVTLAPK		missed K-E@7; missed K-A@11	0.0003	2312.19	4	23	1.1.1.1503.6	Winner
0	99	DMGTDGKEELKADVVPVTLAPK		missed K-E@7; missed K-A@11	-0.0002	2312.19	4	13	1.1.1.1478.5	Winner
0	99	DMGTDGKEELKADVVPVTLAPK		missed K-E@7; missed K-A@11	-0.0002	2312.19	4	24	1.1.1.1483.7	Winner
0	99	DMGTDGKEELKADVVPVTLAPK		missed K-E@7; missed K-A@11	-0.0002	2312.19	4	17	1.1.1.1533.4	Winner
0	99	DMGTDGKEELKADVVPVTLAPK		missed K-E@7; missed K-A@11	-0.0002	2312.19	4	20	1.1.1.1488.10	Winner
0	99	DMGTDGKEELKADVVPVTLAPK		missed K-E@7; missed K-A@11	-0.0056	2312.19	4	10	1.1.1.3072.6	Winner
0	99	DMGTDGKEELKADVVPVTLAPK		missed K-E@7; missed K-A@11	-0.0005	2312.19	3	23	1.1.1.1480.14	Winner
0	99	DMGTDGKEELKADVVPVTLAPK		missed K-E@7; missed K-A@11	-0.0005	2312.19	3	21	1.1.1.1479.10	Winner
0	99	DMGTDGKEELKADVVPVTLAPK		missed K-E@7; missed K-A@11	-0.0005	2312.19	3	30	1.1.1.1482.10	Winner
0	99	DMGTDGKEELKADVVPVTLAPK		missed K-E@7; missed K-A@11	-0.0005	2312.19	3	25	1.1.1.1481.18	Winner
0	99	DMGTDGKEELKADVVPVTLAPK		missed K-E@7; missed K-A@11	-0.0005	2312.19	3	29	1.1.1.1491.16	Winner
0	99	DMGTDGKEELKADVVPVTLAPK		missed K-E@7; missed K-A@11	-0.0005	2312.19	3	27	1.1.1.1502.7	Winner
0	99	DMGTDGKEELKADVVPVTLAPK		missed K-E@7; missed K-A@11	-0.0005	2312.19	3	24	1.1.1.1504.9	Winner
0	99	DMGTDGKEELKADVVPVTLAPK		missed K-E@7; missed K-A@11	0.0003	2312.19	4	18	1.1.1.1523.4	Winner
2	99	DMGTDGKEELKADVVPVTLAPK		missed K-E@7; missed K-A@11	-0.0009	2312.19	3	26	1.1.1.1499.10	Winner
0	99	EELKADVVPVTLAPK		missed K-A@4	-0.0007	1607.91	3	13	1.1.1.1445.5	Winner
0	99	EELKADVVPVTLAPK		missed K-A@4	-0.0007	1607.91	3	14	1.1.1.1433.3	Winner
2	99	EELKADVVPVTLAPK		missed K-A@4	-0.0007	1607.91	3	16	1.1.1.1439.10	Winner
0	99	EIIDTANTTEMNSDHHSK			-0.0012	2041.9	4	17	1.1.1.1041.10	Winner
0	99	EIIDTANTTEMNSDHHSK			-0.0012	2041.9	4	13	1.1.1.1029.8	Winner
0	99	EIIDTANTTEMNSDHHSK			-0.0012	2041.9	4	13	1.1.1.1041.9	Winner
0	99	EIIDTANTTEMNSDHHSK			0.0019	2041.9	3	18	1.1.1.1034.20	Winner
0	99	EIIDTANTTEMNSDHHSK			-0.0012	2041.9	4	14	1.1.1.1046.12	Winner
0	99	EIIDTANTTEMNSDHHSK			-0.0012	2041.9	4	18	1.1.1.1035.8	Winner
0	99	EIIDTANTTEMNSDHHSK			0.0019	2041.9	3	18	1.1.1.1032.8	Winner
0	99	EIIDTANTTEMNSDHHSK			0.0025	2041.9	4	13	1.1.1.1051.14	Winner
0	99	EIIDTANTTEMNSDHHSK			0.0019	2041.9	3	19	1.1.1.1033.9	Winner
0	99	EIIDTANTTEMNSDHHSK			0.0019	2041.9	3	18	1.1.1.1031.4	Winner
2	99	EIIDTANTTEMNSDHHSK			0.0019	2041.9	3	20	1.1.1.1042.16	Winner
0	99	EPSLESGVHSFEEGSELSK			0.0003	2046.94	3	14	1.1.1.1511.8	Winner
2	99	EPSLESGVHSFEEGSELSK			-0.0005	2046.94	3	19	1.1.1.1506.9	Winner
0	99	EPSLESGVHSFEEGSELSK			-0.0001	2046.94	3	20	1.1.1.1496.11	Winner
0	99	EPSLESGVHSFEEGSELSK			0.0003	2046.94	3	12	1.1.1.1517.8	Winner
0	99	EPSLESGVHSFEEGSELSK			0.0004	2046.94	3	15	1.1.1.1486.11	Winner
0	99	EPSLESGVHSFEEGSELSK			-0.0001	2046.94	3	17	1.1.1.1501.12	Winner
0	99	EPSLESGVHSFEEGSELSK			-0.0001	2046.94	3	15	1.1.1.1491.13	Winner
0	99	ESALNLPYHMPENK			0.0012	1641.78	3	15	1.1.1.1420.7	Winner
0	99	ESALNLPYHMPENK			0.0015	1641.78	3	13	1.1.1.1436.5	Winner
0	99	ESALNLPYHMPENK			0.0012	1641.78	3	14	1.1.1.1425.10	Winner
0	99	ESALNLPYHMPENK			-0.0016	1641.78	3	10	1.1.1.1448.4	Winner
2	99	ESALNLPYHMPENK			0.0012	1641.78	3	15	1.1.1.1430.4	Winner
0	99	ESSHNSSFELIGSTIPS		cleaved S-Y@C-term	-0.0001	1790.83	2	13	1.1.1.1620.10	Winner
1.01	99	ESSHNSSFELIGSTIPS		cleaved S-Y@C-term	-0.0001	1790.83	2	15	1.1.1.1615.9	Winner
0	99	ESSHNSSFELIGSTIPS		cleaved S-Y@C-term	-0.0001	1790.83	2	12	1.1.1.1610.11	Winner
2	99	ETQIITGSDES		cleaved S-C@C-term	0.0033	1178.53	2	9	1.1.1.1074.18	Winner
2	99	EVETNALPVVSK		cleaved N-E@N-term	0.0009	1284.69	2	9	1.1.1.1264.18	Winner
0	99	FTSQDASTPASSELNK			0.0054	1681.78	2	28	1.1.1.1112.17	Winner
0	99	FTSQDASTPASSELNK			5.0023	1686.78	2	13	1.1.1.1117.17	Winner
0	99	FTSQDASTPASSELNK			0.006	1681.79	2	16	1.1.1.1139.12	Winner
0	99	FTSQDASTPASSELNK			0.0059	1681.79	2	20	1.1.1.1096.14	Winner
2	99	FTSQDASTPASSELNK			0.0032	1681.78	2	21	1.1.1.1132.14	Winner
0	99	FTSQDASTPASSELNK			0.0057	1681.79	2	24	1.1.1.1102.19	Winner
0	99	FTSQDASTPASSELNK			0.0022	1681.78	2	11	1.1.1.1149.15	Winner
0	99	FTSQDASTPASSELNK			0.0031	1681.78	2	16	1.1.1.1090.12	Winner
0	99	FTSQDASTPASSELNK			0.0057	1681.79	2	23	1.1.1.1122.16	Winner
0	99	FTSQDASTPASSELNK			0.0054	1681.78	2	28	1.1.1.1107.21	Winner
0	99	FTSQDASTPASSELNK			0.0065	1681.79	2	14	1.1.1.1144.12	Winner
0	99	FTSQDASTPASSELNK			0.0054	1681.78	2	23	1.1.1.1127.16	Winner
0	99	FTSQDASTPASSELNK			0.0054	1681.78	2	27	1.1.1.1117.16	Winner
0	99	FTSQDASTPASSELNKQEK		missed K-Q@16	0.0035	2066.98	3	20	1.1.1.1069.11	Winner
2	99	FTSQDASTPASSELNKQEK		missed K-Q@16	0	2066.98	3	26	1.1.1.1079.13	Winner
0	99	FTSQDASTPASSELNKQEK		missed K-Q@16	0	2066.98	3	25	1.1.1.1085.13	Winner
0	99	FTSQDASTPASSELNKQEK		missed K-Q@16	0	2066.98	3	19	1.1.1.1097.12	Winner
0	99	FTSQDASTPASSELNKQEK		missed K-Q@16	0.0033	2066.98	3	12	1.1.1.1064.9	Winner
0	99	FTSQDASTPASSELNKQEK		missed K-Q@16	0	2066.98	3	22	1.1.1.1074.19	Winner
0	99	FTSQDASTPASSELNKQEK		missed K-Q@16	0	2066.98	3	19	1.1.1.1091.17	Winner
0	99	GNSTDFTTDR		cleaved S-G@N-term	-0.0005	1112.47	2	13	1.1.1.929.8	Winner
0	99	GNSTDFTTDR		cleaved S-G@N-term	-0.0028	1112.47	2	12	1.1.1.940.13	Winner
2	99	GNSTDFTTDR		cleaved S-G@N-term	-0.0028	1112.47	2	13	1.1.1.934.14	Winner
2	99	GPSFMTSPSPK			-0.0005	1134.54	2	19	1.1.1.1169.9	Winner
0	99	GPSFMTSPSPK			-0.0014	1134.54	2	13	1.1.1.1193.10	Winner
0	99	GPSFMTSPSPK			-0.0005	1134.54	2	15	1.1.1.1187.9	Winner
0	99	GPSFMTSPSPK			-0.0005	1134.54	2	19	1.1.1.1175.5	Winner
0	99	GPSFMTSPSPK			-0.0005	1134.54	2	18	1.1.1.1181.3	Winner
0	99	GPSFMTSPSPK			0.0017	1134.54	2	17	1.1.1.1163.7	Winner
0	99	GSEQTTGAENEVETNALPVVSK			0.0019	2259.09	3	33	1.1.1.1403.18	Winner
2	99	GSEQTTGAENEVETNALPVVSK			-0.0007	2259.09	2	19	1.1.1.1414.9	Winner
0	99	GSEQTTGAENEVETNALPVVSK			0.0015	2259.09	3	28	1.1.1.1413.16	Winner
0	99	GSEQTTGAENEVETNALPVVSK			-0.0002	2259.09	2	14	1.1.1.1390.21	Winner
0	99	GSEQTTGAENEVETNALPVVSK			0.0019	2259.09	3	33	1.1.1.1397.11	Winner
0	99	GSEQTTGAENEVETNALPVVSK			0.0019	2259.09	3	21	1.1.1.1387.8	Winner
0	99	GSEQTTGAENEVETNALPVVSK			0.0019	2259.09	3	30	1.1.1.1408.14	Winner
0	99	GSEQTTGAENEVETNALPVVSK			0.0019	2259.09	3	31	1.1.1.1392.11	Winner
0	99	GTSFFPTAGGFR			0.0006	1243.6	2	19	1.1.1.1574.6	Winner
0	99	GTSFFPTAGGFR			-0.0014	1243.6	2	12	1.1.1.1600.8	Winner
0	99	GTSFFPTAGGFR			0.0006	1243.6	2	15	1.1.1.1590.7	Winner
0	99	GTSFFPTAGGFR			-0.0014	1243.6	2	11	1.1.1.1605.9	Winner
0	99	GTSFFPTAGGFR			0.0003	1243.6	2	15	1.1.1.1569.10	Winner
2	99	GTSFFPTAGGFR			-0.0014	1243.6	2	16	1.1.1.1595.7	Winner
0	99	GTSFFPTAGGFR			0.0006	1243.6	2	19	1.1.1.1584.5	Winner
0	99	GTSFFPTAGGFR			0.0006	1243.6	2	19	1.1.1.1579.6	Winner
2	99	HLKTDDSTSGLTR		missed K-T@3	0.0002	1429.72	3	12	1.1.1.857.9	Winner
0	99	IHDFFK		cleaved T-I@N-term	0.0002	805.413	2	7	1.1.1.1231.2	Winner
0	99	IHDFFK		cleaved T-I@N-term	0.0002	805.413	2	8	1.1.1.1236.2	Winner
2	99	IHDFFK		cleaved T-I@N-term	-0.001	805.411	2	7	1.1.1.1241.2	Winner
0	99	ITAEEEEEIGEDSQFMILAK			0.0035	2281.07	3	22	1.1.1.1931.9	Winner
0	99	ITAEEEEEIGEDSQFMILAK			0.0022	2281.07	3	30	1.1.1.2571.2	Winner
0	99	ITAEEEEEIGEDSQFMILAK			-0.002	2281.07	3	29	1.1.1.1850.4	Winner
0	99	ITAEEEEEIGEDSQFMILAK			-0.002	2281.07	3	27	1.1.1.1845.4	Winner
0	99	ITAEEEEEIGEDSQFMILAK			-0.002	2281.07	3	22	1.1.1.1902.8	Winner
0	99	ITAEEEEEIGEDSQFMILAK			-0.002	2281.07	3	30	1.1.1.1830.5	Winner
0	99	ITAEEEEEIGEDSQFMILAK			-0.002	2281.07	3	22	1.1.1.1876.7	Winner
0	99	ITAEEEEEIGEDSQFMILAK			-0.0011	2281.07	3	26	1.1.1.1865.5	Winner
0	99	ITAEEEEEIGEDSQFMILAK			-0.0011	2281.07	3	27	1.1.1.2586.2	Winner
0	99	ITAEEEEEIGEDSQFMILAK			-0.0014	2281.07	3	25	1.1.1.1825.3	Winner
0	99	ITAEEEEEIGEDSQFMILAK			-0.0016	2281.07	3	23	1.1.1.1860.5	Winner
0	99	ITAEEEEEIGEDSQFMILAK			-0.0016	2281.07	3	22	1.1.1.1941.6	Winner
0	99	ITAEEEEEIGEDSQFMILAK			-0.0025	2281.06	3	24	1.1.1.1892.4	Winner
0	99	ITAEEEEEIGEDSQFMILAK			-0.0025	2281.06	3	23	1.1.1.1887.7	Winner
0	99	ITAEEEEEIGEDSQFMILAK			-0.0029	2281.06	3	27	1.1.1.1897.3	Winner
0	99	ITAEEEEEIGEDSQFMILAK			-0.0029	2281.06	3	27	1.1.1.1855.6	Winner
0	99	ITAEEEEEIGEDSQFMILAK			-0.0029	2281.06	3	24	1.1.1.1984.4	Winner
0	99	ITAEEEEEIGEDSQFMILAK			-0.0024	2281.06	3	25	1.1.1.1870.5	Winner
0	99	ITAEEEEEIGEDSQFMILAK			-0.002	2281.07	3	25	1.1.1.1907.6	Winner
0	99	ITAEEEEEIGEDSQFMILAK			-0.002	2281.07	3	25	1.1.1.1915.3	Winner
0	99	ITAEEEEEIGEDSQFMILAK			-0.002	2281.07	3	29	1.1.1.1840.8	Winner
0	99	ITAEEEEEIGEDSQFMILAK			-0.002	2281.07	3	23	1.1.1.1881.7	Winner
0	99	ITAEEEEEIGEDSQFMILAK			-0.002	2281.07	3	27	1.1.1.1835.6	Winner
2	99	ITAEEEEEIGEDSQFMILAK			-0.0115	2281.06	3	27	1.1.1.3069.4	Winner
0	99	KDLVKNEELEIQEK		missed K-D@1; missed K-N@5	-0.0008	1713.91	3	13	1.1.1.1198.15	Winner
0	99	KDLVKNEELEIQEK		missed K-D@1; missed K-N@5	-0.0251	1713.89	3	15	1.1.1.1215.2	Winner
0	99	KDLVKNEELEIQEK		missed K-D@1; missed K-N@5	-0.0008	1713.91	3	16	1.1.1.1187.10	Winner
0	99	KDLVKNEELEIQEK		missed K-D@1; missed K-N@5	0.0025	1713.92	3	16	1.1.1.1193.11	Winner
2	99	KDLVKNEELEIQEK		missed K-D@1; missed K-N@5	-0.0004	1713.91	3	20	1.1.1.1175.6	Winner
0	99	KDLVKNEELEIQEK		missed K-D@1; missed K-N@5	-0.0004	1713.91	3	17	1.1.1.1181.4	Winner
0	99	KEPSLESGVHSFEEGSELSK		missed K-E@1	-0.0015	2175.03	3	15	1.1.1.1429.6	Winner
0	99	KEPSLESGVHSFEEGSELSK		missed K-E@1	-0.0015	2175.03	3	11	1.1.1.1426.13	Winner
0	99	KEPSLESGVHSFEEGSELSK		missed K-E@1	0.0027	2175.04	3	17	1.1.1.1434.5	Winner
0	99	KEPSLESGVHSFEEGSELSK		missed K-E@1	0.006	2175.04	3	12	1.1.1.1440.9	Winner
0	99	KEPSLESGVHSFEEGSELSK		missed K-E@1	0.0031	2175.04	4	17	1.1.1.1443.5	Winner
0	99	KEPSLESGVHSFEEGSELSK		missed K-E@1	-0.0017	2175.03	4	19	1.1.1.1428.5	Winner
0	99	KEPSLESGVHSFEEGSELSK		missed K-E@1	-0.0017	2175.03	4	19	1.1.1.1423.5	Winner
0	99	KEPSLESGVHSFEEGSELSK		missed K-E@1	-0.0017	2175.03	4	21	1.1.1.1418.7	Winner
2	99	KEPSLESGVHSFEEGSELSK		missed K-E@1	-0.002	2175.03	3	18	1.1.1.1390.17	Winner
0	99	KEPSLESGVHSFEEGSELSK		missed K-E@1	-0.0015	2175.03	3	24	1.1.1.1404.12	Winner
0	99	KEPSLESGVHSFEEGSELSK		missed K-E@1	-0.0015	2175.03	3	18	1.1.1.1405.13	Winner
0	99	KEPSLESGVHSFEEGSELSK		missed K-E@1	-0.0017	2175.03	3	23	1.1.1.1398.9	Winner
0	99	KEPSLESGVHSFEEGSELSK		missed K-E@1	0.0027	2175.04	3	17	1.1.1.1433.4	Winner
0	99	KEPSLESGVHSFEEGSELSK		missed K-E@1	-0.0011	2175.03	3	20	1.1.1.1411.11	Winner
0	99	KEPSLESGVHSFEEGSELSK		missed K-E@1	-0.0011	2175.03	3	20	1.1.1.1410.12	Winner
0	99	KEPSLESGVHSFEEGSELSK		missed K-E@1	-0.0011	2175.03	3	19	1.1.1.1406.19	Winner
0	99	KEPSLESGVHSFEEGSELSK		missed K-E@1	-0.0011	2175.03	3	22	1.1.1.1409.10	Winner
0	99	KEPSLESGVHSFEEGSELSK		missed K-E@1	-0.0012	2175.03	4	19	1.1.1.1413.7	Winner
0	99	KEPSLESGVHSFEEGSELSK		missed K-E@1	-0.0008	2175.03	4	23	1.1.1.1382.6	Winner
0	99	KEPSLESGVHSFEEGSELSK		missed K-E@1	-0.0005	2175.03	4	24	1.1.1.1397.3	Winner
0	99	KEPSLESGVHSFEEGSELSK		missed K-E@1	-0.0005	2175.03	4	24	1.1.1.1392.6	Winner
0	99	KEPSLESGVHSFEEGSELSK		missed K-E@1	-0.0005	2175.03	4	28	1.1.1.1387.6	Winner
0	99	KEPSLESGVHSFEEGSELSK		missed K-E@1	-0.0008	2175.03	4	23	1.1.1.1408.6	Winner
0	99	KEPSLESGVHSFEEGSELSK		missed K-E@1	-0.0008	2175.03	4	22	1.1.1.1403.5	Winner
0	99	KEPSLESGVHSFEEGSELSK		missed K-E@1	-0.0012	2175.03	4	17	1.1.1.1377.9	Winner
2	99	KKEPSLESGVHSF		cleaved F-E@C-term; missed K-K@1; missed K-E@2	0.0048	1443.74	3	8	1.1.1.1137.8	Winner
0	99	KKEPSLESGVHSFEEGSELSK		missed K-K@1; missed K-E@2	-0.0001	2303.13	3	14	1.1.1.1626.9	Winner
0	99	KKEPSLESGVHSFEEGSELSK		missed K-K@1; missed K-E@2	-0.0001	2303.13	3	16	1.1.1.1432.11	Winner
0	99	KKEPSLESGVHSFEEGSELSK		missed K-K@1; missed K-E@2	0.0014	2303.13	3	11	1.1.1.1452.8	Winner
0	99	KKEPSLESGVHSFEEGSELSK		missed K-K@1; missed K-E@2	0.0013	2303.13	4	15	1.1.1.1725.6	Winner
0	99	KKEPSLESGVHSFEEGSELSK		missed K-K@1; missed K-E@2	-0.0001	2303.13	3	13	1.1.1.1532.12	Winner
0	99	KKEPSLESGVHSFEEGSELSK		missed K-K@1; missed K-E@2	0.0016	2303.13	4	14	1.1.1.1710.4	Winner
0	99	KKEPSLESGVHSFEEGSELSK		missed K-K@1; missed K-E@2	-0.0001	2303.13	3	12	1.1.1.1625.7	Winner
0	99	KKEPSLESGVHSFEEGSELSK		missed K-K@1; missed K-E@2	-0.0001	2303.13	3	17	1.1.1.1512.11	Winner
0	99	KKEPSLESGVHSFEEGSELSK		missed K-K@1; missed K-E@2	0.0013	2303.13	4	19	1.1.1.1680.6	Winner
0	99	KKEPSLESGVHSFEEGSELSK		missed K-K@1; missed K-E@2	-0.0001	2303.13	3	15	1.1.1.1533.7	Winner
0	99	KKEPSLESGVHSFEEGSELSK		missed K-K@1; missed K-E@2	-0.0001	2303.13	3	14	1.1.1.1594.12	Winner
0	99	KKEPSLESGVHSFEEGSELSK		missed K-K@1; missed K-E@2	0.0008	2303.13	4	20	1.1.1.1506.5	Winner
0	99	KKEPSLESGVHSFEEGSELSK		missed K-K@1; missed K-E@2	0.0008	2303.13	4	16	1.1.1.1685.5	Winner
0	99	KKEPSLESGVHSFEEGSELSK		missed K-K@1; missed K-E@2	0.0007	2303.13	3	18	1.1.1.1479.9	Winner
0	99	KKEPSLESGVHSFEEGSELSK		missed K-K@1; missed K-E@2	-0.0004	2303.13	4	21	1.1.1.1576.9	Winner
0	99	KKEPSLESGVHSFEEGSELSK		missed K-K@1; missed K-E@2	0.0008	2303.13	4	13	1.1.1.1705.3	Winner
0	99	KKEPSLESGVHSFEEGSELSK		missed K-K@1; missed K-E@2	0.0008	2303.13	4	15	1.1.1.1700.5	Winner
0	99	KKEPSLESGVHSFEEGSELSK		missed K-K@1; missed K-E@2	0.0005	2303.13	3	21	1.1.1.1507.7	Winner
0	99	KKEPSLESGVHSFEEGSELSK		missed K-K@1; missed K-E@2	-0.0004	2303.13	4	21	1.1.1.1355.9	Winner
0	99	KKEPSLESGVHSFEEGSELSK		missed K-K@1; missed K-E@2	-0.0004	2303.13	4	25	1.1.1.1561.4	Winner
0	99	KKEPSLESGVHSFEEGSELSK		missed K-K@1; missed K-E@2	-0.0004	2303.13	4	20	1.1.1.1365.13	Winner
0	99	KKEPSLESGVHSFEEGSELSK		missed K-K@1; missed K-E@2	0.0013	2303.13	4	22	1.1.1.1638.4	Winner
0	99	KKEPSLESGVHSFEEGSELSK		missed K-K@1; missed K-E@2	0.0005	2303.13	3	16	1.1.1.1497.8	Winner
0	99	KKEPSLESGVHSFEEGSELSK		missed K-K@1; missed K-E@2	-0.0004	2303.13	4	24	1.1.1.1380.7	Winner
0	99	KKEPSLESGVHSFEEGSELSK		missed K-K@1; missed K-E@2	-0.0004	2303.13	4	24	1.1.1.1546.7	Winner
0	99	KKEPSLESGVHSFEEGSELSK		missed K-K@1; missed K-E@2	-0.0001	2303.13	3	10	1.1.1.1631.12	Winner
0	99	KKEPSLESGVHSFEEGSELSK		missed K-K@1; missed K-E@2	-0.0001	2303.13	3	12	1.1.1.1596.14	Winner
0	99	KKEPSLESGVHSFEEGSELSK		missed K-K@1; missed K-E@2	-0.0001	2303.13	3	13	1.1.1.1590.9	Winner
0	99	KKEPSLESGVHSFEEGSELSK		missed K-K@1; missed K-E@2	-0.0001	2303.13	3	13	1.1.1.1430.10	Winner
0	99	KKEPSLESGVHSFEEGSELSK		missed K-K@1; missed K-E@2	0.0001	2303.13	4	12	1.1.1.1803.3	Winner
0	99	KKEPSLESGVHSFEEGSELSK		missed K-K@1; missed K-E@2	0.0001	2303.13	4	20	1.1.1.1406.10	Winner
0	99	KKEPSLESGVHSFEEGSELSK		missed K-K@1; missed K-E@2	0.0001	2303.13	4	12	1.1.1.1695.8	Winner
0	99	KKEPSLESGVHSFEEGSELSK		missed K-K@1; missed K-E@2	0.0001	2303.13	4	24	1.1.1.1461.5	Winner
0	99	KKEPSLESGVHSFEEGSELSK		missed K-K@1; missed K-E@2	0.0001	2303.13	4	25	1.1.1.1531.3	Winner
0	99	KKEPSLESGVHSFEEGSELSK		missed K-K@1; missed K-E@2	0.0001	2303.13	4	25	1.1.1.1455.6	Winner
0	99	KKEPSLESGVHSFEEGSELSK		missed K-K@1; missed K-E@2	0.0001	2303.13	4	26	1.1.1.1526.3	Winner
0	99	KKEPSLESGVHSFEEGSELSK		missed K-K@1; missed K-E@2	0.0001	2303.13	4	16	1.1.1.1675.7	Winner
0	99	KKEPSLESGVHSFEEGSELSK		missed K-K@1; missed K-E@2	0.0001	2303.13	4	17	1.1.1.1426.7	Winner
0	99	KKEPSLESGVHSFEEGSELSK		missed K-K@1; missed K-E@2	0.0001	2303.13	4	20	1.1.1.1481.9	Winner
0	99	KKEPSLESGVHSFEEGSELSK		missed K-K@1; missed K-E@2	0.0001	2303.13	4	24	1.1.1.1466.4	Winner
0	99	KKEPSLESGVHSFEEGSELSK		missed K-K@1; missed K-E@2	-0.0001	2303.13	3	18	1.1.1.1588.6	Winner
0	99	KKEPSLESGVHSFEEGSELSK		missed K-K@1; missed K-E@2	0.0001	2303.13	4	21	1.1.1.1670.4	Winner
0	99	KKEPSLESGVHSFEEGSELSK		missed K-K@1; missed K-E@2	0.0001	2303.13	4	24	1.1.1.1501.9	Winner
0	99	KKEPSLESGVHSFEEGSELSK		missed K-K@1; missed K-E@2	0.0001	2303.13	4	15	1.1.1.1632.2	Winner
0	99	KKEPSLESGVHSFEEGSELSK		missed K-K@1; missed K-E@2	0.0001	2303.13	4	22	1.1.1.1421.6	Winner
0	99	KKEPSLESGVHSFEEGSELSK		missed K-K@1; missed K-E@2	0.0001	2303.13	4	22	1.1.1.1556.5	Winner
0	99	KKEPSLESGVHSFEEGSELSK		missed K-K@1; missed K-E@2	0.0001	2303.13	4	23	1.1.1.1516.4	Winner
0	99	KKEPSLESGVHSFEEGSELSK		missed K-K@1; missed K-E@2	0.0001	2303.13	4	14	1.1.1.1690.7	Winner
0	99	KKEPSLESGVHSFEEGSELSK		missed K-K@1; missed K-E@2	0.0001	2303.13	4	20	1.1.1.1536.5	Winner
0	99	KKEPSLESGVHSFEEGSELSK		missed K-K@1; missed K-E@2	0.0001	2303.13	4	25	1.1.1.1521.4	Winner
0	99	KKEPSLESGVHSFEEGSELSK		missed K-K@1; missed K-E@2	0.0001	2303.13	4	19	1.1.1.1627.5	Winner
0	99	KKEPSLESGVHSFEEGSELSK		missed K-K@1; missed K-E@2	0.0001	2303.13	4	21	1.1.1.1416.4	Winner
0	99	KKEPSLESGVHSFEEGSELSK		missed K-K@1; missed K-E@2	0.0001	2303.13	4	19	1.1.1.1644.5	Winner
0	99	KKEPSLESGVHSFEEGSELSK		missed K-K@1; missed K-E@2	0.0001	2303.13	4	26	1.1.1.1449.5	Winner
0	99	KKEPSLESGVHSFEEGSELSK		missed K-K@1; missed K-E@2	0.0003	2303.13	4	24	1.1.1.1443.7	Winner
0	99	KKEPSLESGVHSFEEGSELSK		missed K-K@1; missed K-E@2	0.0003	2303.13	4	18	1.1.1.1665.5	Winner
0	99	KKEPSLESGVHSFEEGSELSK		missed K-K@1; missed K-E@2	0.0003	2303.13	4	12	1.1.1.1780.5	Winner
0	99	KKEPSLESGVHSFEEGSELSK		missed K-K@1; missed K-E@2	0.0003	2303.13	4	13	1.1.1.1655.7	Winner
0	99	KKEPSLESGVHSFEEGSELSK		missed K-K@1; missed K-E@2	0.0003	2303.13	4	20	1.1.1.1496.7	Winner
0	99	KKEPSLESGVHSFEEGSELSK		missed K-K@1; missed K-E@2	0.0003	2303.13	4	21	1.1.1.1491.8	Winner
0	99	KKEPSLESGVHSFEEGSELSK		missed K-K@1; missed K-E@2	0.0003	2303.13	4	22	1.1.1.1431.4	Winner
0	99	KKEPSLESGVHSFEEGSELSK		missed K-K@1; missed K-E@2	0.0003	2303.13	4	15	1.1.1.1749.6	Winner
0	99	KKEPSLESGVHSFEEGSELSK		missed K-K@1; missed K-E@2	-0.0001	2303.13	3	16	1.1.1.1547.10	Winner
0	99	KKEPSLESGVHSFEEGSELSK		missed K-K@1; missed K-E@2	-0.0001	2303.13	3	13	1.1.1.1534.12	Winner
0	99	KKEPSLESGVHSFEEGSELSK		missed K-K@1; missed K-E@2	0.0005	2303.13	3	22	1.1.1.1508.10	Winner
0	99	KKEPSLESGVHSFEEGSELSK		missed K-K@1; missed K-E@2	0.0003	2303.13	4	12	1.1.1.1796.3	Winner
0	99	KKEPSLESGVHSFEEGSELSK		missed K-K@1; missed K-E@2	0.0003	2303.13	4	25	1.1.1.1471.7	Winner
0	99	KKEPSLESGVHSFEEGSELSK		missed K-K@1; missed K-E@2	0.0003	2303.13	4	24	1.1.1.1476.6	Winner
0	99	KKEPSLESGVHSFEEGSELSK		missed K-K@1; missed K-E@2	0.0001	2303.13	3	12	1.1.1.1463.14	Winner
0	99	KKEPSLESGVHSFEEGSELSK		missed K-K@1; missed K-E@2	0.0001	2303.13	3	16	1.1.1.1509.7	Winner
0	99	KKEPSLESGVHSFEEGSELSK		missed K-K@1; missed K-E@2	0.0001	2303.13	3	16	1.1.1.1550.8	Winner
0	99	KKEPSLESGVHSFEEGSELSK		missed K-K@1; missed K-E@2	0.0001	2303.13	3	21	1.1.1.1510.10	Winner
0	99	KKEPSLESGVHSFEEGSELSK		missed K-K@1; missed K-E@2	0.0001	2303.13	4	23	1.1.1.1411.6	Winner
0	99	KKEPSLESGVHSFEEGSELSK		missed K-K@1; missed K-E@2	0.0001	2303.13	4	23	1.1.1.1551.5	Winner
0	99	KKEPSLESGVHSFEEGSELSK		missed K-K@1; missed K-E@2	0.0001	2303.13	3	19	1.1.1.1459.6	Winner
0	99	KKEPSLESGVHSFEEGSELSK		missed K-K@1; missed K-E@2	0.0003	2303.13	4	23	1.1.1.1511.5	Winner
0	99	KKEPSLESGVHSFEEGSELSK		missed K-K@1; missed K-E@2	0.0003	2303.13	4	15	1.1.1.1650.6	Winner
0	99	KKEPSLESGVHSFEEGSELSK		missed K-K@1; missed K-E@2	0.0003	2303.13	4	16	1.1.1.1660.4	Winner
0	99	KKEPSLESGVHSFEEGSELSK		missed K-K@1; missed K-E@2	0.0003	2303.13	4	20	1.1.1.1437.8	Winner
0	99	KKEPSLESGVHSFEEGSELSK		missed K-K@1; missed K-E@2	0.0001	2303.13	3	22	1.1.1.1552.6	Winner
0	99	KKEPSLESGVHSFEEGSELSK		missed K-K@1; missed K-E@2	0.0001	2303.13	3	18	1.1.1.1460.13	Winner
0	99	KKEPSLESGVHSFEEGSELSK		missed K-K@1; missed K-E@2	0.0001	2303.13	3	16	1.1.1.1456.11	Winner
0	99	KKEPSLESGVHSFEEGSELSK		missed K-K@1; missed K-E@2	-0.0008	2303.13	3	10	1.1.1.1372.16	Winner
0	99	KKEPSLESGVHSFEEGSELSK		missed K-K@1; missed K-E@2	-0.0008	2303.13	3	15	1.1.1.1357.12	Winner
0	99	KKEPSLESGVHSFEEGSELSK		missed K-K@1; missed K-E@2	-0.0008	2303.13	3	11	1.1.1.1358.14	Winner
0	99	KKEPSLESGVHSFEEGSELSK		missed K-K@1; missed K-E@2	-0.0008	2303.13	3	16	1.1.1.1467.11	Winner
0	99	KKEPSLESGVHSFEEGSELSK		missed K-K@1; missed K-E@2	-0.0008	2303.13	3	12	1.1.1.1623.8	Winner
0	99	KKEPSLESGVHSFEEGSELSK		missed K-K@1; missed K-E@2	-0.0008	2303.13	3	16	1.1.1.1468.13	Winner
0	99	KKEPSLESGVHSFEEGSELSK		missed K-K@1; missed K-E@2	-0.0008	2303.13	3	15	1.1.1.1489.13	Winner
0	99	KKEPSLESGVHSFEEGSELSK		missed K-K@1; missed K-E@2	-0.0008	2303.13	3	13	1.1.1.1359.18	Winner
0	99	KKEPSLESGVHSFEEGSELSK		missed K-K@1; missed K-E@2	-0.0009	2303.13	4	22	1.1.1.1385.8	Winner
0	99	KKEPSLESGVHSFEEGSELSK		missed K-K@1; missed K-E@2	-0.0008	2303.13	3	21	1.1.1.1465.8	Winner
0	99	KKEPSLESGVHSFEEGSELSK		missed K-K@1; missed K-E@2	-0.0008	2303.13	3	19	1.1.1.1488.14	Winner
0	99	KKEPSLESGVHSFEEGSELSK		missed K-K@1; missed K-E@2	-0.0008	2303.13	3	13	1.1.1.1356.12	Winner
0	99	KKEPSLESGVHSFEEGSELSK		missed K-K@1; missed K-E@2	0.9987	2304.13	3	22	1.1.1.1548.6	Winner
0	99	KKEPSLESGVHSFEEGSELSK		missed K-K@1; missed K-E@2	-0.0004	2303.13	3	15	1.1.1.1579.11	Winner
0	99	KKEPSLESGVHSFEEGSELSK		missed K-K@1; missed K-E@2	-0.0004	2303.13	3	15	1.1.1.1384.11	Winner
0	99	KKEPSLESGVHSFEEGSELSK		missed K-K@1; missed K-E@2	-0.0004	2303.13	3	15	1.1.1.1580.8	Winner
0	99	KKEPSLESGVHSFEEGSELSK		missed K-K@1; missed K-E@2	-0.0004	2303.13	3	13	1.1.1.1529.12	Winner
0	99	KKEPSLESGVHSFEEGSELSK		missed K-K@1; missed K-E@2	0.9987	2304.13	3	18	1.1.1.1549.8	Winner
0	99	KKEPSLESGVHSFEEGSELSK		missed K-K@1; missed K-E@2	-0.0008	2303.13	3	21	1.1.1.1464.7	Winner
0	99	KKEPSLESGVHSFEEGSELSK		missed K-K@1; missed K-E@2	-0.0008	2303.13	3	10	1.1.1.1374.13	Winner
0	99	KKEPSLESGVHSFEEGSELSK		missed K-K@1; missed K-E@2	-0.0008	2303.13	3	17	1.1.1.1487.7	Winner
0	99	KKEPSLESGVHSFEEGSELSK		missed K-K@1; missed K-E@2	-0.001	2303.13	3	18	1.1.1.1564.6	Winner
0	99	KKEPSLESGVHSFEEGSELSK		missed K-K@1; missed K-E@2	-0.001	2303.13	3	9	1.1.1.1420.19	Winner
0	99	KKEPSLESGVHSFEEGSELSK		missed K-K@1; missed K-E@2	-0.0011	2303.13	4	20	1.1.1.1622.5	Winner
0	99	KKEPSLESGVHSFEEGSELSK		missed K-K@1; missed K-E@2	-0.001	2303.13	3	14	1.1.1.1569.13	Winner
0	99	KKEPSLESGVHSFEEGSELSK		missed K-K@1; missed K-E@2	-0.001	2303.13	3	13	1.1.1.1354.13	Winner
0	99	KKEPSLESGVHSFEEGSELSK		missed K-K@1; missed K-E@2	-0.001	2303.13	3	18	1.1.1.1473.13	Winner
0	99	KKEPSLESGVHSFEEGSELSK		missed K-K@1; missed K-E@2	-0.0011	2303.13	4	16	1.1.1.1602.10	Winner
0	99	KKEPSLESGVHSFEEGSELSK		missed K-K@1; missed K-E@2	-0.001	2303.13	3	16	1.1.1.1470.13	Winner
0	99	KKEPSLESGVHSFEEGSELSK		missed K-K@1; missed K-E@2	-0.001	2303.13	3	14	1.1.1.1567.11	Winner
0	99	KKEPSLESGVHSFEEGSELSK		missed K-K@1; missed K-E@2	-0.001	2303.13	3	17	1.1.1.1422.12	Winner
0	99	KKEPSLESGVHSFEEGSELSK		missed K-K@1; missed K-E@2	-0.001	2303.13	3	16	1.1.1.1568.8	Winner
0	99	KKEPSLESGVHSFEEGSELSK		missed K-K@1; missed K-E@2	-0.001	2303.13	3	19	1.1.1.1565.6	Winner
0	99	KKEPSLESGVHSFEEGSELSK		missed K-K@1; missed K-E@2	-0.001	2303.13	3	19	1.1.1.1419.6	Winner
0	99	KKEPSLESGVHSFEEGSELSK		missed K-K@1; missed K-E@2	-0.001	2303.13	3	17	1.1.1.1570.9	Winner
0	99	KKEPSLESGVHSFEEGSELSK		missed K-K@1; missed K-E@2	-0.0009	2303.13	4	19	1.1.1.1390.11	Winner
0	99	KKEPSLESGVHSFEEGSELSK		missed K-K@1; missed K-E@2	-0.0009	2303.13	4	18	1.1.1.1566.9	Winner
0	99	KKEPSLESGVHSFEEGSELSK		missed K-K@1; missed K-E@2	-0.0014	2303.13	3	21	1.1.1.1433.5	Winner
0	99	KKEPSLESGVHSFEEGSELSK		missed K-K@1; missed K-E@2	-0.0009	2303.13	4	18	1.1.1.1592.9	Winner
0	99	KKEPSLESGVHSFEEGSELSK		missed K-K@1; missed K-E@2	-0.0009	2303.13	4	14	1.1.1.1395.8	Winner
0	99	KKEPSLESGVHSFEEGSELSK		missed K-K@1; missed K-E@2	-0.0009	2303.13	4	15	1.1.1.1597.7	Winner
0	99	KKEPSLESGVHSFEEGSELSK		missed K-K@1; missed K-E@2	-0.0014	2303.13	3	21	1.1.1.1573.8	Winner
0	99	KKEPSLESGVHSFEEGSELSK		missed K-K@1; missed K-E@2	-0.0009	2303.13	4	20	1.1.1.1486.6	Winner
0	99	KKEPSLESGVHSFEEGSELSK		missed K-K@1; missed K-E@2	-0.0009	2303.13	4	21	1.1.1.1400.6	Winner
0	99	KKEPSLESGVHSFEEGSELSK		missed K-K@1; missed K-E@2	-0.0009	2303.13	4	17	1.1.1.1586.6	Winner
0	99	KKEPSLESGVHSFEEGSELSK		missed K-K@1; missed K-E@2	-0.0011	2303.13	4	20	1.1.1.1617.4	Winner
0	99	KKEPSLESGVHSFEEGSELSK		missed K-K@1; missed K-E@2	-0.0011	2303.13	4	16	1.1.1.1607.5	Winner
0	99	KKEPSLESGVHSFEEGSELSK		missed K-K@1; missed K-E@2	-0.0004	2303.13	4	15	1.1.1.1330.12	Winner
0	99	KKEPSLESGVHSFEEGSELSK		missed K-K@1; missed K-E@2	-0.0004	2303.13	3	19	1.1.1.1519.5	Winner
0	99	KKEPSLESGVHSFEEGSELSK		missed K-K@1; missed K-E@2	-0.0004	2303.13	3	15	1.1.1.1500.10	Winner
0	99	KKEPSLESGVHSFEEGSELSK		missed K-K@1; missed K-E@2	-0.0004	2303.13	4	20	1.1.1.1360.10	Winner
0	99	KKEPSLESGVHSFEEGSELSK		missed K-K@1; missed K-E@2	-0.0004	2303.13	4	19	1.1.1.1340.12	Winner
0	99	KKEPSLESGVHSFEEGSELSK		missed K-K@1; missed K-E@2	-0.0004	2303.13	4	19	1.1.1.1335.10	Winner
0	99	KKEPSLESGVHSFEEGSELSK		missed K-K@1; missed K-E@2	-0.0004	2303.13	3	13	1.1.1.1645.9	Winner
0	99	KKEPSLESGVHSFEEGSELSK		missed K-K@1; missed K-E@2	-0.0004	2303.13	3	12	1.1.1.1528.8	Winner
0	99	KKEPSLESGVHSFEEGSELSK		missed K-K@1; missed K-E@2	-0.0004	2303.13	3	13	1.1.1.1609.10	Winner
0	99	KKEPSLESGVHSFEEGSELSK		missed K-K@1; missed K-E@2	-0.0004	2303.13	3	13	1.1.1.1578.10	Winner
0	99	KKEPSLESGVHSFEEGSELSK		missed K-K@1; missed K-E@2	-0.0004	2303.13	3	13	1.1.1.1575.10	Winner
0	99	KKEPSLESGVHSFEEGSELSK		missed K-K@1; missed K-E@2	-0.0004	2303.13	3	20	1.1.1.1499.9	Winner
0	99	KKEPSLESGVHSFEEGSELSK		missed K-K@1; missed K-E@2	-0.0004	2303.13	3	16	1.1.1.1520.13	Winner
0	99	KKEPSLESGVHSFEEGSELSK		missed K-K@1; missed K-E@2	-0.0004	2303.13	4	19	1.1.1.1345.8	Winner
0	99	KKEPSLESGVHSFEEGSELSK		missed K-K@1; missed K-E@2	0.0016	2303.13	3	14	1.1.1.1444.10	Winner
0	99	KKEPSLESGVHSFEEGSELSK		missed K-K@1; missed K-E@2	0.0016	2303.13	4	13	1.1.1.1715.6	Winner
0	99	KKEPSLESGVHSFEEGSELSK		missed K-K@1; missed K-E@2	0.0016	2303.13	4	14	1.1.1.1720.6	Winner
0	99	KKEPSLESGVHSFEEGSELSK		missed K-K@1; missed K-E@2	-0.0004	2303.13	4	17	1.1.1.1581.11	Winner
0	99	KKEPSLESGVHSFEEGSELSK		missed K-K@1; missed K-E@2	-0.0004	2303.13	4	23	1.1.1.1541.5	Winner
0	99	KKEPSLESGVHSFEEGSELSK		missed K-K@1; missed K-E@2	-0.0004	2303.13	4	15	1.1.1.1785.3	Winner
0	99	KKEPSLESGVHSFEEGSELSK		missed K-K@1; missed K-E@2	-0.0004	2303.13	4	18	1.1.1.1350.8	Winner
0	99	KKEPSLESGVHSFEEGSELSK		missed K-K@1; missed K-E@2	-0.0011	2303.13	4	20	1.1.1.1571.11	Winner
0	99	KKEPSLESGVHSFEEGSELSK		missed K-K@1; missed K-E@2	-0.0004	2303.13	4	14	1.1.1.1325.15	Winner
0	99	KKEPSLESGVHSFEEGSELSK		missed K-K@1; missed K-E@2	-0.0004	2303.13	3	18	1.1.1.1517.10	Winner
0	99	KKEPSLESGVHSFEEGSELSK		missed K-K@1; missed K-E@2	-0.0016	2303.13	4	19	1.1.1.1375.8	Winner
0	99	KKEPSLESGVHSFEEGSELSK		missed K-K@1; missed K-E@2	-0.0014	2303.13	3	11	1.1.1.1418.15	Winner
0	99	KKEPSLESGVHSFEEGSELSK		missed K-K@1; missed K-E@2	-0.0016	2303.13	4	23	1.1.1.1612.5	Winner
0	99	KKEPSLESGVHSFEEGSELSK		missed K-K@1; missed K-E@2	-0.0014	2303.13	3	14	1.1.1.1417.13	Winner
0	99	KKEPSLESGVHSFEEGSELSK		missed K-K@1; missed K-E@2	-0.0014	2303.13	3	17	1.1.1.1383.12	Winner
0	99	KKEPSLESGVHSFEEGSELSK		missed K-K@1; missed K-E@2	-0.0014	2303.13	3	13	1.1.1.1351.12	Winner
0	99	KKEPSLESGVHSFEEGSELSK		missed K-K@1; missed K-E@2	0.0052	2303.13	4	14	1.1.1.1730.6	Winner
0	99	KKEPSLESGVHSFEEGSELSK		missed K-K@1; missed K-E@2	-0.0014	2303.13	3	11	1.1.1.1378.11	Winner
0	99	KKEPSLESGVHSFEEGSELSK		missed K-K@1; missed K-E@2	-0.0014	2303.13	3	10	1.1.1.1352.15	Winner
0	99	KKEPSLESGVHSFEEGSELSK		missed K-K@1; missed K-E@2	-0.0017	2303.13	3	12	1.1.1.1614.11	Winner
0	99	KKEPSLESGVHSFEEGSELSK		missed K-K@1; missed K-E@2	0.0052	2303.13	4	15	1.1.1.1738.9	Winner
0	99	KKEPSLESGVHSFEEGSELSK		missed K-K@1; missed K-E@2	0.0016	2303.13	3	14	1.1.1.1448.12	Winner
0	99	KKEPSLESGVHSFEEGSELSK		missed K-K@1; missed K-E@2	-0.0019	2303.13	3	11	1.1.1.1600.12	Winner
2	99	KKEPSLESGVHSFEEGSELSK		missed K-K@1; missed K-E@2	-0.0017	2303.13	3	16	1.1.1.1615.8	Winner
0	99	KKEPSLESGVHSFEEGSELSK		missed K-K@1; missed K-E@2	-0.0016	2303.13	4	18	1.1.1.1370.10	Winner
0	99	KKEPSLESGVHSFEEGSELSK		missed K-K@1; missed K-E@2	-0.0019	2303.13	3	13	1.1.1.1606.10	Winner
0	99	LAALSDHN		cleaved N-P@C-term	0	839.414	2	8	1.1.1.919.4	Winner
2	99	LAALSDHN		cleaved N-P@C-term	0	839.414	2	8	1.1.1.924.4	Winner
0	99	LAALSDHN		cleaved N-P@C-term	0	839.414	2	8	1.1.1.909.5	Winner
2	99	LAALSDHNPSAPR			-0.0006	1347.69	2	23	1.1.1.1025.9	Winner
0	99	LAALSDHNPSAPR			0.0013	1347.69	3	19	1.1.1.1028.5	Winner
0	99	LAALSDHNPSAPR			0.0013	1347.69	3	18	1.1.1.1034.7	Winner
0	99	LAALSDHNPSAPR			0.0013	1347.69	3	16	1.1.1.1022.4	Winner
0	99	LAALSDHNPSAPR			0.0009	1347.69	3	12	1.1.1.1071.7	Winner
0	99	LAALSDHNPSAPR			-0.0006	1347.69	2	19	1.1.1.1038.13	Winner
0	99	LAALSDHNPSAPR			-0.0006	1347.69	2	23	1.1.1.1032.7	Winner
0	99	LAALSDHNPSAPR			0.0013	1347.69	3	13	1.1.1.1028.6	Winner
0	99	LAALSDHNPSAPR			0.0013	1347.69	3	15	1.1.1.1051.7	Winner
0	99	LAALSDHNPSAPR			0.0009	1347.69	3	10	1.1.1.1016.6	Winner
0	99	LAALSDHNPSAPR			-0.0008	1347.69	3	12	1.1.1.1094.2	Winner
0	99	LAALSDHNPSAPR			0.0018	1347.69	3	15	1.1.1.1046.5	Winner
0	99	LAALSDHNPSAPR			0.0018	1347.69	3	15	1.1.1.1040.8	Winner
2	99	LADGDLHSDGPGR		cleaved Y-L@N-term	-0.0025	1308.6	2	11	1.1.1.1084.10	Winner
0	99	LGADEDSFVILEPETNR			0.0048	1903.92	2	20	1.1.1.1712.9	Winner
0	99	LGADEDSFVILEPETNR			1.0069	1904.92	2	20	1.1.1.1699.8	Winner
0	99	LGADEDSFVILEPETNR			1.007	1904.92	2	19	1.1.1.1704.8	Winner
0	99	LGADEDSFVILEPETNR			0.0057	1903.92	2	19	1.1.1.1738.12	Winner
0	99	LGADEDSFVILEPETNR			0.0045	1903.92	2	23	1.1.1.1697.11	Winner
0	99	LGADEDSFVILEPETNR			0.0045	1903.92	2	18	1.1.1.1750.7	Winner
0	99	LGADEDSFVILEPETNR			0.0045	1903.92	2	21	1.1.1.1702.11	Winner
0	99	LGADEDSFVILEPETNR			0.0045	1903.92	2	18	1.1.1.1755.7	Winner
0	99	LGADEDSFVILEPETNR			0.0051	1903.92	2	25	1.1.1.1722.6	Winner
0	99	LGADEDSFVILEPETNR			0.0048	1903.92	2	22	1.1.1.1717.3	Winner
0	99	LGADEDSFVILEPETNR			0.0047	1903.92	2	21	1.1.1.1727.7	Winner
0	99	LGADEDSFVILEPETNR			0.0042	1903.92	2	25	1.1.1.1677.10	Winner
0	99	LGADEDSFVILEPETNR			0.0042	1903.92	2	23	1.1.1.1682.12	Winner
0	99	LGADEDSFVILEPETNR			0.002	1903.92	2	23	1.1.1.1672.6	Winner
0	99	LGADEDSFVILEPETNR			0.0042	1903.92	2	24	1.1.1.1692.10	Winner
0	99	LGADEDSFVILEPETNR			0.0045	1903.92	2	22	1.1.1.1707.10	Winner
0	99	LGADEDSFVILEPETNR			0.0042	1903.92	2	24	1.1.1.1687.14	Winner
0	99	LGADEDSFVILEPETNR			0.0042	1903.92	2	18	1.1.1.1778.5	Winner
0	99	LGADEDSFVILEPETNR			0.0053	1903.92	2	19	1.1.1.1772.9	Winner
2	99	LGADEDSFVILEPETNR			-0.0014	1903.91	2	21	1.1.1.2585.2	Winner
0	99	LGADEDSFVILEPETNR			-0.0014	1903.91	2	16	1.1.1.1657.12	Winner
0	99	LGADEDSFVILEPETNR			-0.0009	1903.92	2	21	1.1.1.2570.2	Winner
0	99	LGADEDSFVILEPETNR			0.0054	1903.92	2	16	1.1.1.1764.10	Winner
0	99	LGADEDSFVILEPETNR			0.0057	1903.92	2	18	1.1.1.1732.10	Winner
0	99	LGADEDSFVILEPETNR			0.0054	1903.92	2	17	1.1.1.1763.6	Winner
0	99	LGADEDSFVILEPETNR			0.0054	1903.92	2	20	1.1.1.1765.3	Winner
0	99	LGADEDSFVILEPETNR			0.0054	1903.92	2	20	1.1.1.1762.7	Winner
0	99	LGADEDSFVILEPETNR			0.0053	1903.92	2	19	1.1.1.1744.17	Winner
0	99	LGADEDSFVILEPETNR			0.0019	1903.92	2	23	1.1.1.1667.5	Winner
0	99	LGADEDSFVILEPETNR			0.0008	1903.92	2	20	1.1.1.1643.7	Winner
0	99	LGADEDSFVILEPETNR			-0.0001	1903.92	3	15	1.1.1.1760.3	Winner
0	99	LGADEDSFVILEPETNR			0.0008	1903.92	2	16	1.1.1.1649.11	Winner
2	99	LGADEDSFVILEPETNRELEALK		missed R-E@17	-0.0011	2587.3	3	19	1.1.1.1829.5	Winner
0	99	LGADEDSFVILEPETNRELEALK		missed R-E@17	-0.0007	2587.3	3	30	1.1.1.1849.2	Winner
0	99	LGADEDSFVILEPETNRELEALK		missed R-E@17	-0.0007	2587.3	3	27	1.1.1.1834.7	Winner
0	99	LGADEDSFVILEPETNRELEALK		missed R-E@17	-0.0007	2587.3	3	28	1.1.1.1859.2	Winner
0	99	LGADEDSFVILEPETNRELEALK		missed R-E@17	-0.0003	2587.3	3	31	1.1.1.1854.2	Winner
0	99	LGADEDSFVILEPETNRELEALK		missed R-E@17	-0.0007	2587.3	3	29	1.1.1.1844.3	Winner
0	99	LGADEDSFVILEPETNRELEALK		missed R-E@17	-0.0007	2587.3	3	31	1.1.1.1839.4	Winner
0	99	LLDADGFLNVR		cleaved Q-L@N-term	0.0005	1231.66	2	19	1.1.1.1670.6	Winner
0	99	LLDADGFLNVR		cleaved Q-L@N-term	0.0022	1231.66	2	14	1.1.1.1705.5	Winner
0	99	LLDADGFLNVR		cleaved Q-L@N-term	0.0007	1231.66	2	18	1.1.1.1690.9	Winner
0	99	LLDADGFLNVR		cleaved Q-L@N-term	0.0007	1231.66	2	19	1.1.1.1685.6	Winner
0	99	LLDADGFLNVR		cleaved Q-L@N-term	0.0005	1231.66	2	19	1.1.1.1680.7	Winner
2	99	LLDADGFLNVR		cleaved Q-L@N-term	0.0005	1231.66	2	19	1.1.1.1665.7	Winner
0	99	LLDADGFLNVR		cleaved Q-L@N-term	0.0005	1231.66	2	14	1.1.1.1695.9	Winner
0	99	LLDADGFLNVR		cleaved Q-L@N-term	0.0005	1231.66	2	19	1.1.1.1675.9	Winner
0	99	LLDADGFLNVR		cleaved Q-L@N-term	0.0004	1231.66	2	12	1.1.1.1660.6	Winner
0	99	LLDADGFLNVR		cleaved Q-L@N-term	0.0022	1231.66	2	16	1.1.1.1700.6	Winner
2	99	LQSGNSTDFTTDR		cleaved S-L@N-term	0.0024	1440.65	2	8	1.1.1.1053.13	Winner
2	99	LSDHNPSAPR		cleaved A-L@N-term	-0.0129	1092.52	2	10	1.1.1.1030.14	Winner
0	99	LSEPSLPIEDSQDLYNASPEPK			0.9851	2429.15	3	20	1.1.1.1640.8	Winner
0	99	LSEPSLPIEDSQDLYNASPEPK			0.0017	2428.17	3	32	1.1.1.1661.7	Winner
0	99	LSEPSLPIEDSQDLYNASPEPK			0.0017	2428.17	3	31	1.1.1.1656.11	Winner
0	99	LSEPSLPIEDSQDLYNASPEPK			0.002	2428.17	3	32	1.1.1.1666.7	Winner
0	99	LSEPSLPIEDSQDLYNASPEPK			0.0017	2428.17	3	33	1.1.1.1646.6	Winner
0	99	LSEPSLPIEDSQDLYNASPEPK			0.0017	2428.17	3	33	1.1.1.1651.9	Winner
0	99	LSEPSLPIEDSQDLYNASPEPK			-0.0011	2428.16	2	23	1.1.1.1655.14	Winner
0	99	LSEPSLPIEDSQDLYNASPEPK			-0.0011	2428.16	2	21	1.1.1.1652.20	Winner
0	99	LSEPSLPIEDSQDLYNASPEPK			-0.0011	2428.16	2	18	1.1.1.1648.9	Winner
0	99	LSEPSLPIEDSQDLYNASPEPK			-0.0011	2428.16	2	21	1.1.1.1658.18	Winner
0	99	LSEPSLPIEDSQDLYNASPEPK			-0.0011	2428.16	2	21	1.1.1.1659.12	Winner
0	99	LSEPSLPIEDSQDLYNASPEPK			-0.0011	2428.16	2	17	1.1.1.1649.12	Winner
0	99	LSEPSLPIEDSQDLYNASPEPK			-0.0011	2428.16	2	21	1.1.1.1654.11	Winner
2	99	LSEPSLPIEDSQDLYNASPEPK			-0.0014	2428.16	2	13	1.1.1.1647.15	Winner
0	99	LSEPSLPIEDSQDLYNASPEPK			0.0015	2428.17	3	28	1.1.1.1671.8	Winner
0	99	LSEPSLPIEDSQDLYNASPEPK			-0.0009	2428.16	2	17	1.1.1.1667.7	Winner
0	99	LSEPSLPIEDSQDLYNASPEPK			-0.0011	2428.16	2	15	1.1.1.1650.16	Winner
0	99	LSEPSLPIEDSQDLYNASPEPK			-0.0011	2428.16	2	18	1.1.1.1663.10	Winner
0	99	LSEPSLPIEDSQDLYNASPEPK			-0.0011	2428.16	2	23	1.1.1.1660.11	Winner
0	99	MGYFPTEEK			-0.0004	1100.48	2	12	1.1.1.1291.11	Winner
0	99	MGYFPTEEK			-0.0006	1100.48	2	13	1.1.1.1276.14	Winner
0	99	MGYFPTEEK			-0.0006	1100.48	2	13	1.1.1.1271.15	Winner
0	99	MGYFPTEEK			-0.0006	1100.48	2	12	1.1.1.1266.14	Winner
0	99	MGYFPTEEK			-0.0006	1100.48	2	12	1.1.1.1261.15	Winner
0	99	MGYFPTEEK			-0.0006	1100.48	2	13	1.1.1.1281.14	Winner
0	99	MGYFPTEEK			-0.002	1100.48	2	12	1.1.1.1286.13	Winner
0	99	MGYFPTEEKSETDENSGK		missed K-S@9	0.004	2047.87	3	17	1.1.1.1195.17	Winner
0	99	MGYFPTEEKSETDENSGK		missed K-S@9	0.004	2047.87	3	18	1.1.1.1183.8	Winner
2	99	MGYFPTEEKSETDENSGK		missed K-S@9	0.004	2047.87	3	23	1.1.1.1189.7	Winner
0	99	NASRPMVIQESK			-0.0026	1358.69	3	13	1.1.1.950.6	Winner
0	99	NASRPMVIQESK			-0.0028	1358.69	3	16	1.1.1.939.4	Winner
0	99	NASRPMVIQESK			-0.0026	1358.69	3	14	1.1.1.945.6	Winner
0	99	NEELEIQEK			0.0012	1130.55	2	14	1.1.1.1062.12	Winner
0	99	NEELEIQEK			0.0009	1130.55	2	9	1.1.1.1052.15	Winner
2	99	NEELEIQEK			0.0012	1130.55	2	15	1.1.1.1077.14	Winner
0	99	NEELEIQEK			0.0007	1130.55	2	13	1.1.1.1094.9	Winner
0	99	NEELEIQEK			0.0012	1130.55	2	11	1.1.1.1088.17	Winner
0	99	NEELEIQEK			0.0021	1130.55	2	9	1.1.1.1100.15	Winner
0	99	NEELEIQEK			0.0015	1130.55	2	14	1.1.1.1057.12	Winner
0	99	NEELEIQEK			0.0012	1130.55	2	15	1.1.1.1067.11	Winner
0	99	NEELEIQEK			0.0012	1130.55	2	15	1.1.1.1072.12	Winner
0	99	NEELEIQEK			0.0013	1130.55	2	13	1.1.1.1082.12	Winner
0	99	NFVFHTLSPVK			-0.0013	1287.7	2	13	1.1.1.1463.9	Winner
2	99	NFVFHTLSPVK			-0.0013	1287.7	2	14	1.1.1.1452.5	Winner
0	99	NFVFHTLSPVK			-0.0013	1287.7	2	13	1.1.1.1458.7	Winner
0	99	NFVFHTLSPVK			-0.0013	1287.7	2	11	1.1.1.1449.7	Winner
0	99	NIDDASQMDLFHR			-0.0005	1560.7	3	14	1.1.1.1451.5	Winner
0	99	NIDDASQMDLFHR			-0.0005	1560.7	3	13	1.1.1.1457.4	Winner
0	99	NIDDASQMDLFHR			-0.0009	1560.7	3	11	1.1.1.1463.4	Winner
2	99	NIDDASQMDLFHR			-0.0005	1560.7	3	14	1.1.1.1445.4	Winner
0	99	NIDDASQMDLFHR			-0.0003	1560.7	3	12	1.1.1.1439.7	Winner
0	99	NPFEAIRPG		cleaved G-S@C-term	-0.0021	999.512	2	8	1.1.1.1322.6	Winner
2	99	NPFEAIRPG		cleaved G-S@C-term	-0.0021	999.512	2	10	1.1.1.1322.5	Winner
0	99	NPFEAIRPGSAQQVK			-0.0012	1640.86	2	16	1.1.1.1258.20	Winner
2	99	NPFEAIRPGSAQQVK			-0.0012	1640.86	2	20	1.1.1.1263.21	Winner
0	99	NPFEAIRPGSAQQVK			-0.0027	1640.86	3	18	1.1.1.1278.12	Winner
0	99	NPFEAIRPGSAQQVK			-0.0027	1640.86	3	13	1.1.1.1265.10	Winner
0	99	NPFEAIRPGSAQQVK			-0.0027	1640.86	3	15	1.1.1.1273.10	Winner
0	99	NPFEAIRPGSAQQVK			-0.0012	1640.86	2	20	1.1.1.1268.21	Winner
0	99	NPFEAIRPGSAQQVK			-0.0009	1640.86	3	13	1.1.1.1288.10	Winner
0	99	NQYQALKPR			-0.0013	1116.6	2	14	1.1.1.912.13	Winner
2	99	NQYQALKPR			-0.0013	1116.6	2	15	1.1.1.917.12	Winner
0	99	NQYQALKPR			-0.0013	1116.6	2	13	1.1.1.927.12	Winner
0	99	NQYQALKPR			-0.0013	1116.6	2	15	1.1.1.922.10	Winner
2	99	PFEAIRPGSAQQVK		cleaved N-P@N-term	0	1526.82	3	11	1.1.1.1140.8	Winner
0	99	PMVIQESK		cleaved R-P@N-term	0.0003	930.485	2	13	1.1.1.967.5	Winner
0	99	PMVIQESK		cleaved R-P@N-term	0.0003	930.485	2	13	1.1.1.977.4	Winner
0	99	PMVIQESK		cleaved R-P@N-term	0.0003	930.485	2	13	1.1.1.972.4	Winner
0	99	PMVIQESK		cleaved R-P@N-term	0.0005	930.485	2	12	1.1.1.982.2	Winner
0	99	PMVIQESK		cleaved R-P@N-term	0.0003	930.485	2	13	1.1.1.962.5	Winner
2	99	QSDIRPSPGDSSV		cleaved V-L@C-term	-0.0062	1343.63	2	12	1.1.1.1023.16	Winner
0	99	QSDIRPSPGDSSVLQQ		cleaved Q-E@C-term	0.0023	1712.84	2	19	1.1.1.1211.13	Winner
0	99	QSDIRPSPGDSSVLQQ		cleaved Q-E@C-term	0.0043	1712.84	2	21	1.1.1.1205.14	Winner
0	99	QSDIRPSPGDSSVLQQ		cleaved Q-E@C-term	0.0043	1712.84	2	10	1.1.1.1199.21	Winner
2	99	QSDIRPSPGDSSVLQQESN		cleaved N-F@C-term	0.0051	2042.96	3	9	1.1.1.1219.20	Winner
1.35	99	QSDIRPSPGDSSVLQQESNFLGNNHSEE		cleaved E-C@C-term	-0.0012	3070.39	3	18	1.1.1.1545.12	Winner
0	99	QSDIRPSPGDSSVLQQESNFLGNNHSEE		cleaved E-C@C-term	-0.0012	3070.39	3	17	1.1.1.1540.14	Winner
1.46	99	RGPSFMTSPSPK		missed R-G@1	-0.9943	1289.64	3	12	1.1.1.1081.5	Winner
0	99	RGPSFMTSPSPK		missed R-G@1	-0.0018	1290.64	2	10	1.1.1.1082.15	Winner
2	99	SDHNPSAPR		cleaved L-S@N-term	0.0005	979.448	2	9	1.1.1.1028.7	Winner
2	99	SGNSTDFTTDR		cleaved Q-S@N-term	-0.0006	1199.5	2	9	1.1.1.940.15	Winner
2	99	SGNSTDFTTDRK		cleaved Q-S@N-term; missed R-K@11	-0.0012	1327.6	3	11	1.1.1.837.3	Winner
0	99	SGNSTDFTTDRK		cleaved Q-S@N-term; missed R-K@11	-0.0012	1327.6	3	10	1.1.1.843.3	Winner
0	99	SLSSDSTLLLFK			0.0067	1309.72	2	11	1.1.1.1843.4	Winner
0	99	SLSSDSTLLLFK			-0.0004	1309.71	2	13	1.1.1.1826.3	Winner
0	99	SLSSDSTLLLFK			0.0002	1309.71	2	20	1.1.1.1770.4	Winner
0	99	SLSSDSTLLLFK			0	1309.71	2	17	1.1.1.1781.5	Winner
2	99	SLSSDSTLLLFK			0	1309.71	2	19	1.1.1.1775.4	Winner
0	99	SLSSDSTLLLFK			0.0027	1309.72	2	15	1.1.1.1813.3	Winner
0	99	SLSSDSTLLLFK			0.0024	1309.72	2	17	1.1.1.1786.4	Winner
0	99	SLSSDSTLLLFK			0.0022	1309.72	2	13	1.1.1.1803.5	Winner
0	99	SLSSDSTLLLFK			0.0022	1309.72	2	16	1.1.1.1791.4	Winner
0	99	SLSSDSTLLLFK			0.0011	1309.71	2	20	1.1.1.1740.3	Winner
0	99	SLSSDSTLLLFK			0.0022	1309.72	2	17	1.1.1.1808.4	Winner
0	99	SLSSDSTLLLFK			0.0028	1309.72	2	20	1.1.1.1750.6	Winner
0	99	SLSSDSTLLLFK			0.0028	1309.72	2	20	1.1.1.1755.5	Winner
0	99	SLSSDSTLLLFK			0.0011	1309.71	2	21	1.1.1.1724.5	Winner
0	99	SLSSDSTLLLFK			0.0011	1309.71	2	20	1.1.1.1734.5	Winner
0	99	SLSSDSTLLLFK			0.0027	1309.72	2	13	1.1.1.1818.3	Winner
0	99	SLSSDSTLLLFK			0.0011	1309.71	2	21	1.1.1.1745.5	Winner
0	99	SLSSDSTLLLFK			0.0011	1309.71	2	20	1.1.1.1729.3	Winner
0	99	SLSSDSTLLLFK			0.0005	1309.71	2	14	1.1.1.1797.3	Winner
0	99	SLSSDSTLLLFK			0.0005	1309.71	2	15	1.1.1.1709.6	Winner
0	99	SLSSDSTLLLFK			0.0005	1309.71	2	18	1.1.1.1765.2	Winner
0	99	SLSSDSTLLLFK			0.0006	1309.71	2	20	1.1.1.1760.4	Winner
0	99	SLSSDSTLLLFK			0.0027	1309.72	2	11	1.1.1.1704.4	Winner
0	99	SLSSDSTLLLFK			0.003	1309.72	2	20	1.1.1.1719.4	Winner
0	99	SLSSDSTLLLFK			0.0006	1309.71	2	18	1.1.1.1714.6	Winner
2	99	SLYQENLEAQ		cleaved Q-V@C-term	0.0022	1193.56	2	15	1.1.1.1292.6	Winner
2	99	SLYQENLEAQVK		cleaved K-P@C-term	-0.0001	1420.72	2	13	1.1.1.1331.20	Winner
0	99	SLYQENLEAQVK		cleaved K-P@C-term	-0.0007	1420.72	2	16	1.1.1.1316.14	Winner
0	99	SLYQENLEAQVK		cleaved K-P@C-term	-0.0001	1420.72	2	20	1.1.1.1326.21	Winner
0	99	SLYQENLEAQVK		cleaved K-P@C-term	-0.0007	1420.72	2	19	1.1.1.1321.18	Winner
0	99	SPSPGLFR			-0.0006	859.455	2	12	1.1.1.1173.4	Winner
0	99	SPSPGLFR			-0.0004	859.455	2	11	1.1.1.1196.6	Winner
0	99	SPSPGLFR			-0.0006	859.455	2	12	1.1.1.1185.4	Winner
0	99	SQLLDADGFLNVR		cleaved Q-S@N-term	0.0013	1446.75	2	19	1.1.1.1746.9	Winner
0	99	SQLLDADGFLNVR		cleaved Q-S@N-term	0.0013	1446.75	2	22	1.1.1.1741.9	Winner
0	99	SQLLDADGFLNVR		cleaved Q-S@N-term	0.0013	1446.75	2	22	1.1.1.1730.8	Winner
0	99	SQLLDADGFLNVR		cleaved Q-S@N-term	0.0013	1446.75	2	21	1.1.1.1725.9	Winner
2	99	SQLLDADGFLNVR		cleaved Q-S@N-term	0.0011	1446.75	2	20	1.1.1.1756.5	Winner
0	99	SQLLDADGFLNVR		cleaved Q-S@N-term	0.0014	1446.75	2	19	1.1.1.1751.6	Winner
0	99	SQLLDADGFLNVR		cleaved Q-S@N-term	0.0042	1446.75	2	14	1.1.1.1720.10	Winner
0	99	SQLLDADGFLNVR		cleaved Q-S@N-term	0.0004	1446.75	2	14	1.1.1.1662.3	Winner
0	99	SQLLDADGFLNVR		cleaved Q-S@N-term	0.0013	1446.75	2	22	1.1.1.1735.7	Winner
2	99	SRPMVIQESK		cleaved A-S@N-term	-0.003	1173.61	2	8	1.1.1.944.12	Winner
0	99	SSAVGPPEK			-0.0006	870.444	2	13	1.1.1.807.2	Winner
0	99	SSAVGPPEK			-0.0011	870.444	2	10	1.1.1.828.4	Winner
0	99	SSAVGPPEK			-0.0006	870.444	2	13	1.1.1.818.2	Winner
0	99	SSAVGPPEK			-0.0006	870.444	2	11	1.1.1.823.4	Winner
0	99	SSAVGPPEK			-0.0006	870.444	2	14	1.1.1.813.2	Winner
0	99	SSAVGPPEK			-0.0011	870.444	2	12	1.1.1.794.2	Winner
0	99	TDDSTSGLTR			-0.0012	1051.48	2	13	1.1.1.859.5	Winner
0	99	TDDSTSGLTR			-0.0009	1051.48	2	13	1.1.1.864.6	Winner
0	99	TDDSTSGLTR			-0.0009	1051.48	2	16	1.1.1.849.6	Winner
0	99	TDDSTSGLTR			-0.0012	1051.48	2	13	1.1.1.876.6	Winner
0	99	TDDSTSGLTR			-0.0009	1051.48	2	15	1.1.1.854.5	Winner
0	99	TDDSTSGLTR			-0.0012	1051.48	2	12	1.1.1.870.7	Winner
0	99	TDDSTSGLTR			-0.0009	1051.48	2	14	1.1.1.838.5	Winner
0	99	TDDSTSGLTR			-0.0009	1051.48	2	16	1.1.1.844.5	Winner
0	99	TDDSTSGLTR			-0.0012	1051.48	2	12	1.1.1.881.5	Winner
0	99	TGSLLNQPK			0.0013	956.53	2	14	1.1.1.1006.8	Winner
0	99	TGSLLNQPK			0.0013	956.53	2	14	1.1.1.988.6	Winner
0	99	TGSLLNQPK			0.0013	956.53	2	14	1.1.1.994.4	Winner
0	99	TGSLLNQPK			0.0013	956.53	2	14	1.1.1.1000.7	Winner
0	99	TGSLLNQPK			0.0013	956.53	2	13	1.1.1.983.7	Winner
0	99	TGSLLNQPK			-0.0004	956.529	2	13	1.1.1.1029.7	Winner
2	99	TGSLLNQPK			-0.0004	956.529	2	13	1.1.1.1017.9	Winner
0	99	TGSLLNQPK			0.001	956.53	2	12	1.1.1.1011.7	Winner
0	99	TGSLLNQPK			0.0011	956.53	2	13	1.1.1.978.7	Winner
0	99	TIHDFFK			-0.0015	906.458	2	11	1.1.1.1253.4	Winner
0	99	TIHDFFK			-0.0016	906.458	2	11	1.1.1.1258.3	Winner
0	99	TIHDFFK			-0.0016	906.458	2	10	1.1.1.1263.5	Winner
2	99	TIHDFFK			-0.0002	906.46	2	10	1.1.1.1283.6	Winner
0	99	TIHDFFK			-0.0018	906.458	2	9	1.1.1.1278.6	Winner
0	99	TIHDFFK			-0.0001	906.46	2	11	1.1.1.1268.4	Winner
0	99	TLFLGAGDFQF		cleaved F-C@C-term	0.0001	1214.6	2	15	1.1.1.2120.2	Winner
0	99	TLFLGAGDFQF		cleaved F-C@C-term	0.0002	1214.6	2	15	1.1.1.2126.3	Winner
0	99	TLFLGAGDFQF		cleaved F-C@C-term	0.0002	1214.6	2	16	1.1.1.2132.3	Winner
2	99	TLFLGAGDFQF		cleaved F-C@C-term	-0.0002	1214.6	2	15	1.1.1.2147.2	Winner
0	99	TLFLGAGDFQF		cleaved F-C@C-term	-0.0002	1214.6	2	15	1.1.1.2157.2	Winner
2	99	TMLDDDKR		missed K-R@7	-0.0011	992.459	2	9	1.1.1.845.4	Winner
0	99	TVADSDESYMEK			0.0019	1373.57	2	15	1.1.1.1067.13	Winner
0	99	TVADSDESYMEK			0.0019	1373.57	2	11	1.1.1.1072.15	Winner
0	99	TVADSDESYMEK			0.0019	1373.57	2	21	1.1.1.1052.20	Winner
0	99	TVADSDESYMEK			0.0019	1373.57	2	11	1.1.1.1077.19	Winner
0	99	TVADSDESYMEK			0.0017	1373.57	2	12	1.1.1.1036.16	Winner
2	99	TVADSDESYMEK			0.0019	1373.57	2	20	1.1.1.1057.15	Winner
0	99	TVADSDESYMEK			0.0019	1373.57	2	20	1.1.1.1047.19	Winner
0	99	TVADSDESYMEK			0.0019	1373.57	2	20	1.1.1.1062.17	Winner
0	99	TVADSDESYMEK			0.0019	1373.57	2	21	1.1.1.1042.17	Winner
0	99	VGGLVAFEPH		cleaved Q-V@N-term; cleaved H-A@C-term	0.0001	1024.53	2	15	1.1.1.1465.3	Winner
2	99	VGGLVAFEPH		cleaved Q-V@N-term; cleaved H-A@C-term	0.0001	1024.53	2	17	1.1.1.1460.5	Winner
0	99	VGGLVAFEPH		cleaved Q-V@N-term; cleaved H-A@C-term	0.0004	1024.53	2	11	1.1.1.1470.5	Winner
0	99	VGGLVAFEPH		cleaved Q-V@N-term; cleaved H-A@C-term	0.0001	1024.53	2	13	1.1.1.1454.4	Winner
0	99	VGGLVAFEPHALEGEGPQNPEETDEKVEEPEQQNK		cleaved Q-V@N-term; missed K-V@26	-0.0017	3829.79	4	33	1.1.1.1535.15	Winner
2	99	VGGLVAFEPHALEGEGPQNPEETDEKVEEPEQQNK		cleaved Q-V@N-term; missed K-V@26	-0.0017	3829.79	4	26	1.1.1.1545.11	Winner
0	99	VGGLVAFEPHALEGEGPQNPEETDEKVEEPEQQNK		cleaved Q-V@N-term; missed K-V@26	-0.0017	3829.79	4	23	1.1.1.1550.9	Winner
0	99	VGGLVAFEPHALEGEGPQNPEETDEKVEEPEQQNK		cleaved Q-V@N-term; missed K-V@26	-0.0017	3829.79	4	28	1.1.1.1530.13	Winner
0	99	VGGLVAFEPHALEGEGPQNPEETDEKVEEPEQQNK		cleaved Q-V@N-term; missed K-V@26	-0.0017	3829.79	4	32	1.1.1.1540.13	Winner
2	99	VKNEELEIQEK		cleaved L-V@N-term; missed K-N@2	-0.0033	1357.71	2	8	1.1.1.1319.18	Winner
0	99	YLADGDLHSDGPGR			0.0019	1471.67	3	14	1.1.1.1103.7	Winner
0	99	YLADGDLHSDGPGR			0.0021	1471.67	3	12	1.1.1.1118.6	Winner
0	99	YLADGDLHSDGPGR			0.0019	1471.67	3	14	1.1.1.1108.6	Winner
0	99	YLADGDLHSDGPGR			0.0021	1471.67	3	14	1.1.1.1113.5	Winner
0	99	YLADGDLHSDGPGR			0.0021	1471.67	3	9	1.1.1.1143.8	Winner
0	99	YLADGDLHSDGPGR			0.0012	1471.67	3	10	1.1.1.1054.9	Winner
2	99	YLADGDLHSDGPGR			0.0012	1471.67	3	18	1.1.1.1079.6	Winner
0	99	YLADGDLHSDGPGR			0.0012	1471.67	3	18	1.1.1.1085.7	Winner
0	99	YLADGDLHSDGPGR			0.0012	1471.67	3	17	1.1.1.1074.10	Winner
0	99	YLADGDLHSDGPGR			0.0012	1471.67	3	14	1.1.1.1076.11	Winner
0	99	YLADGDLHSDGPGR			0.0015	1471.67	3	14	1.1.1.1069.6	Winner
0	99	YLADGDLHSDGPGR			0.0015	1471.67	3	11	1.1.1.1123.6	Winner
0	99	YLADGDLHSDGPGR			0.0015	1471.67	3	14	1.1.1.1064.5	Winner
0	99	YLADGDLHSDGPGR			0.0015	1471.67	3	16	1.1.1.1097.8	Winner
0	99	YLADGDLHSDGPGR			0.0015	1471.67	3	13	1.1.1.1059.6	Winner
0	99	YLADGDLHSDGPGR			0.0012	1471.67	3	17	1.1.1.1091.11	Winner
2	99	YQALKPR		cleaved Q-Y@N-term	0.0006	874.503	2	9	1.1.1.916.4	Winner
0	98.9	AGQTVNVNVIVK			0.0019	1240.72	2	10	1.1.1.1355.12	Winner
0	98.9	TIHDFFK			-0.0015	906.458	2	11	1.1.1.1243.5	Winner
0	98.9	TIHDFFK			-0.0018	906.458	2	10	1.1.1.1273.4	Winner
0	98.8	SPSPGLFR			0.001	859.456	2	10	1.1.1.1207.3	Winner
0	98.7	EMDKENNDGSSEIGK		missed K-E@4	-0.0025	1651.7	3	12	1.1.1.839.5	Winner
0	98.7	NPFEAIRPG		cleaved G-S@C-term	-0.001	999.513	2	10	1.1.1.1327.7	Winner
0	98.7	RGPSFMTSPSPK		missed R-G@1	-0.0018	1290.64	2	9	1.1.1.1088.20	Winner
0	98.7	SPSPGLFR			-0.0006	859.455	2	10	1.1.1.1201.3	Winner
0	98.7	TIHDFFK			-0.0015	906.458	2	11	1.1.1.1248.3	Winner
0	98.6	KKEPSLESGVHSFEEGSELSK		missed K-K@1; missed K-E@2	-0.0008	2303.13	3	9	1.1.1.1373.14	Winner
0	98.5	YLADGDLHSDGPGR			0.0012	1471.67	3	12	1.1.1.1091.12	Winner
0	98.4	NPFEAIRPGSAQQVK			-0.0027	1640.86	3	12	1.1.1.1283.11	Winner
0	98.3	EMDKENNDGSSEIGK		missed K-E@4	-0.0025	1651.7	3	12	1.1.1.834.8	Winner
0	98.3	KKEPSLESGVHSFEEGSELSK		missed K-K@1; missed K-E@2	-0.0028	2303.13	4	11	1.1.1.1320.10	Winner
0.79	98.3	SSDSTLLLFK		cleaved L-S@N-term	-0.0021	1109.59	2	8	1.1.1.1589.4	Winner
0	98.3	TIHDFFK			-0.0001	906.46	2	11	1.1.1.1228.5	Winner
0	98.2	YLADGDLHSDGPGR			0.0021	1471.67	3	9	1.1.1.1133.5	Winner
0	98.1	SPSPGLFR			-0.0006	859.455	2	11	1.1.1.1167.4	Winner
0	98	KKEPSLESGVHSFEEGSELSK		missed K-K@1; missed K-E@2	-0.0023	2303.13	4	12	1.1.1.1315.7	Winner
0	98	NQYQALKPR			0.0004	1116.6	2	9	1.1.1.907.13	Winner
0	97.9	TIHDFFK			-0.0001	906.46	2	11	1.1.1.1233.2	Winner
0	97.8	LLDADGFLNVR		cleaved Q-L@N-term	0.0022	1231.66	2	11	1.1.1.1710.6	Winner
0	97.6	TIHDFFK			0.0002	906.46	2	9	1.1.1.1223.7	Winner
0	97.5	ESALNLPYHMPENK			0.0008	1641.78	3	11	1.1.1.1415.7	Winner
0	97.5	ESSHNSSFELIGSTIPS		cleaved S-Y@C-term	-0.0001	1790.83	2	11	1.1.1.1625.9	Winner
0	97.5	SSDSTLLLFK		cleaved L-S@N-term	-0.0021	1109.59	2	8	1.1.1.1583.4	Winner
0	97.4	TIHDFFK			-0.0015	906.458	2	11	1.1.1.1238.4	Winner
0	97.2	SPSPGLFR			-0.0004	859.455	2	11	1.1.1.1191.3	Winner
0	97.2	SPSPGLFR			-0.0006	859.455	2	11	1.1.1.1179.3	Winner
0	97.1	TMLDDDKR		missed K-R@7	-0.0008	992.459	2	10	1.1.1.829.3	Winner
0.35	97	QSDIRPSPGDSSVLQQESNFLGNN		cleaved N-H@C-term	-0.0066	2588.2	3	12	1.1.1.1598.10	Winner
0	96.8	QLGVDVSIKPR			0.0001	1210.7	3	8	1.1.1.1265.2	Winner
0	96.7	LAALSDHNPSAPR			0.0013	1347.69	3	7	1.1.1.1123.4	Winner
0	96.7	MGYFPTEEK			-0.0006	1100.48	2	11	1.1.1.1267.10	Winner
0	96.6	NFVFHTLSPVK			0.0009	1287.7	3	8	1.1.1.1462.2	Winner
1.47	96.6	TTYDSAEEENKENLYAGK		missed K-E@11	0.0012	2060.92	3	10	1.1.1.1110.13	Winner
0	96.6	YLADGDLHSDGPGR			0.0012	1471.67	3	10	1.1.1.1128.5	Winner
0	96.5	MGYFPTEEK			-0.0006	1100.48	2	10	1.1.1.1262.7	Winner
0	96.3	DMGTDGKEELK		missed K-E@7	0.001	1221.56	3	11	1.1.1.906.2	Winner
0	96.3	LAALSDHNPSAPR			-0.0012	1347.69	3	8	1.1.1.1087.6	Winner
0	96.3	PMVIQESK		cleaved R-P@N-term	-0.0001	930.485	2	7	1.1.1.987.5	Winner
0.13	96.2	DGKEELKADVVPVTLAPK		cleaved T-D@N-term; missed K-E@3; missed K-A@7	-0.0017	1908.05	3	10	1.1.1.1406.15	Winner
0	96.1	QLGVDVSIKPR			-0.0027	1210.7	3	8	1.1.1.1270.2	Winner
0	96	KKEPSLESGVHSFEEGSELSK		missed K-K@1; missed K-E@2	0.9996	2304.13	4	12	1.1.1.1586.7	Winner
0	95.7	LDRLKQLGVDVSIKPRLGADEDSFVILEPETNRELEALK		cleaved T-L@N-term; missed R-L@3; missed K-Q@5; missed R-L@16; missed R-E@33	-5.0298	4400.36	5	13	1.1.1.1839.5	Winner
0	95.7	QLGVDVSIKPR			-0.0027	1210.7	3	8	1.1.1.1283.2	Winner
0	95	EMDKENNDGSSEIGK		missed K-E@4	-0.0025	1651.7	3	11	1.1.1.845.8	Winner
0	95	EMDKENNDGSSEIGK		missed K-E@4	-0.003	1651.7	3	11	1.1.1.829.5	Winner
0	95	KDLVKNEELEIQEK		missed K-D@1; missed K-N@5	-0.0032	1713.91	3	11	1.1.1.1226.14	Winner
0.03	95	QSDIRPSPGD		cleaved D-S@C-term	0.0012	1070.5	2	10	1.1.1.855.4	Winner
0	94.7	TMLDDDKR		missed K-R@7	-0.0008	992.459	2	10	1.1.1.834.5	Winner
0	94	YLADGDLHSDGPGR			0.0021	1471.67	3	8	1.1.1.1138.6	Winner
0	93.9	NPFEAIRPGSAQQVK			-0.0027	1640.86	3	11	1.1.1.1260.13	Winner
0	93.8	GTSFFPTAGGFR			-0.002	1243.6	2	10	1.1.1.1610.6	Winner
0	93.8	RGPSFMTSPSPK		missed R-G@1	-0.0018	1290.64	2	7	1.1.1.1077.16	Winner
0	93.4	LAALSDHNPSAPR			-0.0012	1347.69	3	7	1.1.1.1102.6	Winner
0	93.4	MGYFPTEEK			0.0002	1100.49	2	9	1.1.1.1296.12	Winner
0	93.4	NASRPMVIQESK			0.0002	1358.7	3	8	1.1.1.960.4	Winner
0	92.9	EIIDTANTTEMNSDHHSK			-0.0012	2041.9	4	11	1.1.1.1033.6	Winner
0	92.7	SSAVGPPEK			-0.0011	870.444	2	8	1.1.1.833.2	Winner
0	92.6	NPFEAIRPG		cleaved G-S@C-term	-0.0007	999.513	2	8	1.1.1.1337.5	Winner
0	92.6	NPFEAIRPG		cleaved G-S@C-term	-0.001	999.513	2	7	1.1.1.1332.6	Winner
0.41	92.6	STDFTTDR		cleaved N-S@N-term	0.0001	941.409	2	10	1.1.1.896.4	Winner
0	92.5	KKEPSLESGVHSFEEGSELSK		missed K-K@1; missed K-E@2	-0.0014	2303.13	3	11	1.1.1.1535.14	Winner
0	92.4	STDFTTDR		cleaved N-S@N-term	0.0001	941.409	2	10	1.1.1.901.6	Winner
0	92.1	AVGFLSVPK			0.001	916.539	2	6	1.1.1.1500.4	Winner
0	92.1	KKEPSLESGVHSFEEGSELSK		missed K-K@1; missed K-E@2	0.0007	2303.13	3	11	1.1.1.1636.9	Winner
0	91.7	SPSPGLFR			-0.0006	859.455	2	9	1.1.1.1200.5	Winner
0	91.7	YLADGDLHSDGPGR			0.0015	1471.67	3	10	1.1.1.1070.7	Winner
0	90.9	HLKTDDSTSGLTR		missed K-T@3	0.0002	1429.72	3	9	1.1.1.852.9	Winner
0	90.9	LAALSDHNPSAPR			-0.0015	1347.69	3	7	1.1.1.1107.10	Winner
0.77	90.8	NPFEAIR		cleaved R-P@C-term	-0.0005	845.439	2	8	1.1.1.1246.3	Winner
0	90.6	SLYQENLEAQVKP		cleaved P-C@C-term	0.0009	1517.77	2	10	1.1.1.1410.13	Winner
0	89.8	KLDGASHTKPGEK		missed K-L@1	0.0028	1366.72	3	8	1.1.1.610.4	Winner
0	89.2	TMLDDDKR		missed K-R@7	-0.0008	992.459	2	9	1.1.1.839.2	Winner
0	87.3	SPSPGLFR			-0.0006	859.455	2	10	1.1.1.1187.3	Winner
0	85.9	TIHDFFK			-0.0018	906.458	2	8	1.1.1.1291.6	Winner
0	85.7	TGSLLNQPK			-0.0009	956.528	2	8	1.1.1.1023.9	Winner
0	85.6	KKEPSLESGVHSFEEGSELSK		missed K-K@1; missed K-E@2	0.0008	2303.13	4	11	1.1.1.1754.5	Winner
0	85	LAALSDHNPSAPR			0.0025	1347.69	3	9	1.1.1.1066.6	Winner
0	84.8	ADVVPVTLAPK			0	1108.65	2	10	1.1.1.1383.7	Winner
0	84.8	KKEPSLESGVHSFEEGSELSK		missed K-K@1; missed K-E@2	0.0001	2303.13	4	11	1.1.1.1764.4	Winner
0	84.8	KKEPSLESGVHSFEEGSELSK		missed K-K@1; missed K-E@2	0.0001	2303.13	4	11	1.1.1.1769.4	Winner
0	83	NFVFHTLSPVK			-0.0011	1287.7	2	7	1.1.1.1468.9	Winner
0	82.3	DMGTDGKEELK		missed K-E@7	0.001	1221.56	3	9	1.1.1.914.2	Winner
0	80	TGSLLNQPK			0.0011	956.53	2	8	1.1.1.973.8	Winner
0	79.4	SPSPGLFR			-0.0009	859.454	2	8	1.1.1.1213.3	Winner
0	76.8	ESALNLPYHMPENK			-0.0012	1641.78	3	10	1.1.1.1442.7	Winner
0	76.5	VKNEELEIQEK		cleaved L-V@N-term; missed K-N@2	-0.0026	1357.71	2	7	1.1.1.1324.19	Winner
0.12	74.2	VILEPETNR		cleaved F-V@N-term	0.0021	1069.58	2	9	1.1.1.1093.7	Winner
0	74.1	MGYFPTEEK			-0.002	1100.48	2	7	1.1.1.1256.17	Winner
0	73.6	STLLLFK		cleaved D-S@N-term	0.0005	820.506	2	7	1.1.1.1554.2	Winner
0	72.2	TGSLLNQPK			0.001	956.53	2	8	1.1.1.1086.8	Winner
0	70.8	QLGVDVSIKPR			-0.0013	1210.7	3	6	1.1.1.1351.4	Winner
0	70.6	RFTLDR		missed R-F@1	0.0009	806.441	2	8	1.1.1.961.2	Winner
0	70.4	MGYFPTEEK			0.0008	1100.49	2	8	1.1.1.1304.9	Winner
0	69.5	QLGVDVSIKPR			-0.001	1210.7	3	6	1.1.1.1336.2	Winner
0	65.5	AVGFLSVPK			0.0029	916.541	2	7	1.1.1.1546.2	Winner
0	61.9	DEKEMDKENNDGSSEIGK		missed K-E@3; missed K-E@7	0.0009	2023.87	4	9	1.1.1.875.9	Winner
0	61.3	ADVVPVTLAPK			-0.0002	1108.65	2	7	1.1.1.1388.9	Winner
0	58.7	YLADGDLHSDGPGR			0.0021	1471.67	3	7	1.1.1.1148.8	Winner
0	57.2	AVGFLSVPK			0.0008	916.539	2	6	1.1.1.1425.3	Winner
0	55.8	KKEPSLESGVHSFEEGSELSK		missed K-K@1; missed K-E@2	-0.0026	2303.13	3	8	1.1.1.1598.8	Winner
0	54.7	PMVIQESK		cleaved R-P@N-term	0.0009	930.485	2	6	1.1.1.995.2	Winner
0	51.8	DMGTDGKEELKADVVPVTLAPK		missed K-E@7; missed K-A@11	0.0003	2312.19	4	10	1.1.1.1559.7	Winner
0.03	51.5	FEAIRPGSAQQVK		cleaved P-F@N-term	0.0004	1429.77	3	9	1.1.1.1073.6	Winner
0	51.3	RFTLDR		missed R-F@1	0.0004	806.44	2	6	1.1.1.998.2	Winner
0	49.9	KKEPSLESGVHSF		cleaved F-E@C-term; missed K-K@1; missed K-E@2	0.0009	1443.74	3	6	1.1.1.1127.11	Winner
0	47.8	QSDIRPSPGD		cleaved D-S@C-term	0.0012	1070.5	2	9	1.1.1.860.8	Winner
0	45.8	ALSDHNPSAPR		cleaved A-A@N-term	-0.0017	1163.57	2	9	1.1.1.1022.14	Winner
0	45.4	AVGFLSVPK			0.0008	916.539	2	7	1.1.1.1515.4	Winner
0	45.4	KKEPSLESGVHSFEEGSELSK		missed K-K@1; missed K-E@2	-0.0011	2303.13	5	10	1.1.1.1582.5	Winner
0	44.5	NASRPMVIQESK			-0.0004	1358.7	3	8	1.1.1.955.6	Winner
0	44.5	STDFTTDR		cleaved N-S@N-term	0.0001	941.409	2	9	1.1.1.906.4	Winner
0.01	42.9	GNSTDFTTDRK		cleaved S-G@N-term; missed R-K@10	-0.0002	1240.57	3	9	1.1.1.836.4	Winner
0	41.9	ASTPASSELNK		cleaved D-A@N-term	-0.0006	1103.55	2	6	1.1.1.885.12	Winner
0.01	38.9	EAIRPGSAQQVK		cleaved F-E@N-term	-0.0002	1282.7	3	9	1.1.1.856.2	Winner
0	38.8	SLSSDSTLLLFK			0.0061	1309.72	2	7	1.1.1.1833.4	Winner
0	38.1	LAALSDHNPSAPR			-0.0015	1347.69	3	6	1.1.1.1112.7	Winner
0	37.9	GNSTDFTTDRK		cleaved S-G@N-term; missed R-K@10	-0.0002	1240.57	3	9	1.1.1.842.3	Winner
0	37.9	LAALSDHN		cleaved N-P@C-term	0	839.414	2	8	1.1.1.914.4	Winner
0	37.3	EIIDTANTTEMNSDHHSK			-0.0012	2041.9	4	9	1.1.1.1046.11	Winner
0	37.1	DEKEMDKENNDGSSEIGK		missed K-E@3; missed K-E@7	-0.0027	2023.86	3	7	1.1.1.874.11	Winner
0	35.8	NPFEAIR		cleaved R-P@C-term	-0.0005	845.439	2	7	1.1.1.1236.4	Winner
0	35.8	YLADGDLHSDGPGR			-0.0026	1471.67	3	6	1.1.1.1320.4	Winner
0	35	KKEPSLESGVHSFEEGSELSK		missed K-K@1; missed K-E@2	-0.0001	2303.13	3	9	1.1.1.1591.11	Winner
0	34.9	VVPVTLAPK		cleaved D-V@N-term	-0.0004	922.585	2	9	1.1.1.1211.6	Winner
0	34.8	LAALSDHNPSAPR			-0.0015	1347.69	3	6	1.1.1.1117.5	Winner
0	34.8	NPFEAIR		cleaved R-P@C-term	-0.0005	845.439	2	7	1.1.1.1241.3	Winner
0	33.9	QYQALKPR		cleaved N-Q@N-term	0.0001	1002.56	2	7	1.1.1.917.10	Winner
0	33.8	LAALSDHNPSAPR			0.0009	1347.69	3	8	1.1.1.1076.6	Winner
0.02	32.9	SFEEGSELSK		cleaved H-S@N-term	0.0007	1111.5	2	6	1.1.1.1051.19	Winner
0	32.6	STLLLFK		cleaved D-S@N-term	0.0005	820.506	2	7	1.1.1.1544.2	Winner
0	30.7	AGQTVNVNVIVK			-0.0017	1240.71	2	6	1.1.1.1308.20	Winner
0.01	28.9	DGDLHSDGPGR		cleaved A-D@N-term	0.0182	1124.5	2	7	1.1.1.1081.16	Winner
0	28.8	YLADGDLHSDGPGR			0.0015	1471.67	3	9	1.1.1.1099.7	Winner
0	27.9	ASTPASSELNK		cleaved D-A@N-term	-0.0006	1103.55	2	6	1.1.1.880.16	Winner
0	27.9	ESLESIR		cleaved E-E@N-term	-0.0088	832.42	2	6	1.1.1.1030.4	Winner
0	27.9	ETQIITGSDES		cleaved S-C@C-term	0.0066	1178.54	2	8	1.1.1.1069.10	Winner
0	27.9	GNSTDFTTDR		cleaved S-G@N-term	-0.0028	1112.47	2	7	1.1.1.946.7	Winner
0	27.9	LAALSDHN		cleaved N-P@C-term	-0.0002	839.414	2	7	1.1.1.904.3	Winner
0	27.9	QYQALKPR		cleaved N-Q@N-term	0.0002	1002.56	2	7	1.1.1.912.10	Winner
0	27.9	VVPVTLAPK		cleaved D-V@N-term	-0.0003	922.585	2	8	1.1.1.1205.4	Winner
0	27.5	KKEPSLESGVHSFEEGSELSK		missed K-K@1; missed K-E@2	-0.0028	2303.13	4	9	1.1.1.1322.13	Winner
0	25.9	GNSTDFTTDRK		cleaved S-G@N-term; missed R-K@10	0.0005	1240.57	3	8	1.1.1.831.3	Winner
0	25.6	NQYQALKPR			-0.0016	1116.6	2	8	1.1.1.932.14	Winner
0	24.9	RFTLDR		missed R-F@1	0.0006	806.441	2	7	1.1.1.992.2	Winner
0	24.3	NPFEAIR		cleaved R-P@C-term	-0.0003	845.439	2	5	1.1.1.1225.3	Winner
0	24.1	AVGFLSVPK			0.0002	916.538	2	5	1.1.1.1485.2	Winner
0	24	YLADGDLHSDGPGR			-0.0087	1471.66	3	6	1.1.1.1306.14	Winner
0	23.9	QLGVDVSIKPR			-0.038	1210.67	3	7	1.1.1.1293.2	Winner
0	23.9	RFTLDR		missed R-F@1	0.0012	806.441	2	8	1.1.1.981.2	Winner
0	23.6	NIDDASQMDLFHR			0	1560.7	3	9	1.1.1.1471.6	Winner
0	23.5	RFTLDR		missed R-F@1	0.0009	806.441	2	8	1.1.1.966.2	Winner
0	23.5	RFTLDR		missed R-F@1	0.0009	806.441	2	8	1.1.1.971.2	Winner
0	22.1	NASRPMVIQESK			-0.0028	1358.69	3	6	1.1.1.933.7	Winner
0	22.1	TGSLLNQPK			0.0019	956.531	2	5	1.1.1.955.9	Winner
0	21.8	QLGVDVSIKPR			-0.0027	1210.7	3	6	1.1.1.1278.2	Winner
0	21.8	QLGVDVSIKPR			-0.0002	1210.7	3	6	1.1.1.1288.3	Winner
0.02	21.7	ESALNLPY		cleaved Y-H@C-term	-0.0009	905.449	2	7	1.1.1.1562.2	Winner
0	21.4	AVGFLSVPK			0.001	916.539	2	6	1.1.1.1505.2	Winner
0	21	LAALSDHNPSAPR			-0.002	1347.69	3	7	1.1.1.1129.5	Winner
0	21	PMVIQESK		cleaved R-P@N-term	0.0007	930.485	2	7	1.1.1.957.6	Winner
0	20.9	MGYFPTEEK			-0.002	1100.48	2	5	1.1.1.1322.8	Winner
0	20.9	NQEDDVEQPF		cleaved F-N@C-term	-0.0029	1219.5	2	8	1.1.1.1321.15	Winner
0	20.9	RFTLDR		missed R-F@1	0.0014	806.441	2	7	1.1.1.986.2	Winner
0	20.9	TGSLLNQPK			0.004	956.533	2	6	1.1.1.1092.5	Winner
0	20.8	KDLVKNEELEIQEK		missed K-D@1; missed K-N@5	-0.0032	1713.91	3	6	1.1.1.1231.14	Winner
0	20.8	LAALSDHNPSAPR			-0.0017	1347.69	3	6	1.1.1.1081.6	Winner
0	20.8	NPFEAIR		cleaved R-P@C-term	-0.0005	845.439	2	7	1.1.1.1251.3	Winner
0	20.8	RFTLDR		missed R-F@1	0.0009	806.441	2	5	1.1.1.1004.2	Winner
0	20.8	RFTLDR		missed R-F@1	0.0009	806.441	2	7	1.1.1.976.3	Winner
0	20.8	STDFTTDR		cleaved N-S@N-term	0.0001	941.409	2	7	1.1.1.899.7	Winner
0	20.8	TGSLLNQPK			-0.0131	956.516	2	4	1.1.1.1130.5	Winner
0	20.8	TIHDFFK			-0.009	906.451	2	5	1.1.1.1321.7	Winner
0	20.8	TTYDSAEEENKENLYAGK		missed K-E@11	0.0012	2060.92	3	7	1.1.1.1116.18	Winner
0	20.6	ESALNLPYHMPENK			0.0012	1641.78	3	6	1.1.1.1410.7	Winner
0	20.6	KKEPSLESGVHSFEEGSELSK		missed K-K@1; missed K-E@2	-0.0009	2303.13	4	7	1.1.1.3072.5	Winner
0	20.1	AVGFLSVPK			0.0008	916.539	2	6	1.1.1.1510.4	Winner
0	20	KKEPSLESGVHSFEEGSELSK		missed K-K@1; missed K-E@2	-0.0014	2303.13	3	6	1.1.1.1353.12	Winner
0	19.9	VVPVTLAPK		cleaved D-V@N-term	-0.0004	922.585	2	8	1.1.1.1217.5	Winner
0	19.9	YQALKPR		cleaved Q-Y@N-term	0.0006	874.503	2	7	1.1.1.911.4	Winner
0	19.7	KKEPSLESGVHSFEEGSELSK		missed K-K@1; missed K-E@2	0.0001	2303.13	4	9	1.1.1.1815.3	Winner
0	19.6	AVGFLSVPK			0.001	916.539	2	5	1.1.1.1520.2	Winner
0	19.6	AVGFLSVPK			0.0029	916.541	2	4	1.1.1.1530.2	Winner
0	19.6	AVGFLSVPK			-0.0021	916.536	2	4	1.1.1.1398.2	Winner
0	19.6	DMGTDGKEELKADVVPVTLAPK		missed K-E@7; missed K-A@11	0.0046	2312.2	3	8	1.1.1.1534.13	Winner
0	19.6	DMGTDGKEELKADVVPVTLAPK		missed K-E@7; missed K-A@11	0.0008	2312.19	4	8	1.1.1.1569.8	Winner
0	19.6	DMGTDGKEELKADVVPVTLAPK		missed K-E@7; missed K-A@11	-0.0034	2312.19	4	8	1.1.1.1624.6	Winner
0	19.6	EPSLESGVHSFEEGSELSK			-0.0001	2046.94	3	6	1.1.1.1481.15	Winner
0	19.6	KKEPSLESGVHSFEEGSELSK		missed K-K@1; missed K-E@2	-0.0001	2303.13	3	6	1.1.1.1629.17	Winner
0	19.6	KKEPSLESGVHSFEEGSELSK		missed K-K@1; missed K-E@2	0.0001	2303.13	4	8	1.1.1.1809.5	Winner
0	19.6	KKEPSLESGVHSFEEGSELSK		missed K-K@1; missed K-E@2	-0.0008	2303.13	3	6	1.1.1.1366.19	Winner
0	19.6	KKEPSLESGVHSFEEGSELSK		missed K-K@1; missed K-E@2	-0.0004	2303.13	3	8	1.1.1.1583.12	Winner
0	19.6	KKEPSLESGVHSFEEGSELSK		missed K-K@1; missed K-E@2	-0.0007	2303.13	5	8	1.1.1.1554.3	Winner
0	19.6	KKEPSLESGVHSFEEGSELSK		missed K-K@1; missed K-E@2	-0.0026	2303.13	3	8	1.1.1.1599.9	Winner
0	19.6	KKEPSLESGVHSFEEGSELSK		missed K-K@1; missed K-E@2	-0.0019	2303.13	3	8	1.1.1.1601.11	Winner
0	17.9	LAALSDHN		cleaved N-P@C-term	0	839.414	2	7	1.1.1.929.3	Winner
0	11.9	FEAIRPGSAQQVK		cleaved P-F@N-term	0.0004	1429.77	3	9	1.1.1.1078.6	Winner
0	8	IHDFFK		cleaved T-I@N-term	-0.001	805.411	2	6	1.1.1.1246.2	Winner
0	6	ASRPMVIQESK		cleaved N-A@N-term	-0.0001	1244.65	3	7	1.1.1.923.3	Winner
0	0.2	PFEAIRPGSAQQVK		cleaved N-P@N-term	0	1526.82	3	7	1.1.1.1135.8	Winner

## Sheet: sicdc7
Contrib	Conf	Sequence	Modifications	Cleavages	∆Mass	Prec MW	z	Sc	Spectrum	Type
0	96.4	FTSQAEKHLPR	Acetyl(K)@7	missed K-H@7	0.0005	1354.7	3	11	1.1.1.1112.6	Winner
0	48.9	DMGTDGKEELKADVVPVTLAPK	Acetyl@N-term	missed K-E@7; missed K-A@11	-0.0073	2354.2	3	8	1.1.1.1480.16	Winner
2	99	NQEDDVEQPFNDSG	Amidated@C-term	cleaved G-C@C-term	0.0002	1591.64	2	15	1.1.1.1253.12	Winner
0	99	NQEDDVEQPFNDSG	Amidated@C-term	cleaved G-C@C-term	0.0002	1591.64	2	18	1.1.1.1248.11	Winner
2	99	SLYQENLEAQVKP	Amidated@C-term	cleaved P-C@C-term	-0.0006	1516.79	2	14	1.1.1.1349.12	Winner
0	92.4	NQEDDVEQPFNDSG	Amidated@C-term	cleaved G-C@C-term	0.0002	1591.64	2	10	1.1.1.1260.18	Winner
0	52.3	DLVKNEELEIQEK	Carboxy(D)@1	missed K-N@4	-0.0277	1629.78	3	9	1.1.1.1334.9	Winner
0	97.6	LDEDDSCSLLTK	Carboxy(D)@5; Dioxidation(C)@7		0.014	1413.6	2	13	1.1.1.1392.16	Winner
0	68.2	ETQIITGSDESCR	Carboxy(E)@10; Dioxidation(C)@12		0.0195	1513.64	2	9	1.1.1.1158.10	Winner
0	62.6	GSEQTTGAENEVETNALPVVSK	Carboxy(E)@11		-0.0288	2303.05	3	10	1.1.1.1397.18	Winner
0	68.5	LGADEDSFVILEPETNR	Cation:K(D)@6		-0.003	1941.87	3	11	1.1.1.1680.14	Winner
0	68.5	ITAEEEEEIGEDSQFMILAK	Cation:K(E)@11; Oxidation(D)@12		-0.0259	2334.99	4	13	1.1.1.1839.6	Winner
0	92.1	GSEQTTGAENEVETNALPVVSK	Cation:K(E)@13		-0.0133	2297.03	3	13	1.1.1.1399.13	Winner
0	82.2	GSEQTTGAENEVETNALPVVSK	Cation:K(E)@9		-0.0084	2297.03	4	11	1.1.1.1405.6	Winner
0	92.1	LSEPSLPIEDSQDLYNASPEPK	Cation:K(E)@9; Oxidation(D)@10		-0.0335	2482.08	4	15	1.1.1.1651.8	Winner
0	99	LSEPSLPIEDSQDLYNASPEPK	Cation:Na(D)@10		0.0001	2450.15	3	21	1.1.1.1655.12	Winner
0	99	LSEPSLPIEDSQDLYNASPEPK	Cation:Na(D)@13		0.0001	2450.15	3	19	1.1.1.1660.9	Winner
0	93.6	SLSSDSTLLLFK	Cation:Na(D)@5		0.003	1331.7	2	12	1.1.1.1735.11	Winner
0	90.3	SLSSDSTLLLFK	Cation:Na(D)@5		0.003	1331.7	2	12	1.1.1.1730.11	Winner
0	99	LGADEDSFVILEPETNR	Cation:Na(D)@6		0.0012	1925.9	3	20	1.1.1.1688.9	Winner
0	99	LGADEDSFVILEPETNR	Cation:Na(D)@6		0.0012	1925.9	3	19	1.1.1.1673.6	Winner
0	99	LGADEDSFVILEPETNR	Cation:Na(D)@6		0.0012	1925.9	3	17	1.1.1.1699.3	Winner
0	99	LGADEDSFVILEPETNR	Cation:Na(D)@6		0.0012	1925.9	3	19	1.1.1.1678.9	Winner
0	99	LGADEDSFVILEPETNR	Cation:Na(D)@6		0.0012	1925.9	3	24	1.1.1.1683.6	Winner
0	14.9	LAALSDHNPSAPR	Cation:Na(D)@6		0.002	1369.67	3	7	1.1.1.1041.5	Winner
0	99	GSEQTTGAENEVETNALPVVSK	Cation:Na(E)@11		-0.0024	2281.07	3	19	1.1.1.1392.17	Winner
0	99	GSEQTTGAENEVETNALPVVSK	Cation:Na(E)@11; Deamidated(N)@15		-0.0027	2282.05	3	14	1.1.1.1361.12	Winner
0	99	LGADEDSFVILEPETNR	Cation:Na(E)@5		0.0009	1925.9	3	17	1.1.1.1693.10	Winner
0	99	ITAEEEEEIGEDSQFMILAK	Cation:Na(E)@8; Oxidation(M)@16		-0.0067	2319.04	3	22	1.1.1.2229.3	Winner
0	99	GSEQTTGAENEVETNALPVVSK	Cation:Na(E)@9		-0.0028	2281.07	3	23	1.1.1.1403.18	Winner
0	99	GSEQTTGAENEVETNALPVVSK	Cation:Na(E)@9		-0.0028	2281.07	3	25	1.1.1.1397.17	Winner
0	99	GSEQTTGAENEVETNALPVVSK	Cation:Na(E)@9		-0.0028	2281.07	3	20	1.1.1.1408.14	Winner
0	99	LSEPSLPIEDSQDLYNASPEPK	Cation:Na(E)@9		0.0001	2450.15	3	19	1.1.1.1650.7	Winner
0	78.3	LSEPSLPIEDSQDLYNASPEPK	Cation:Na(E)@9		0.0001	2450.15	3	11	1.1.1.1665.11	Winner
0	99	ESALNLPYHMPENK	Chloro(Y)@8		0.0092	1675.75	2	13	1.1.1.1317.16	Winner
2	99	ESALNLPYHMPENK	Chloro(Y)@8		0.0092	1675.75	2	12	1.1.1.1312.11	Winner
0	99	CLEDDTQSQLLDADGFLNVR	Cyano(C)@1	cleaved F-C@N-term	-0.0006	2276.04	3	24	1.1.1.1867.13	Winner
0	99	CLEDDTQSQLLDADGFLNVR	Cyano(C)@1	cleaved F-C@N-term	-0.0006	2276.04	3	20	1.1.1.1878.21	Winner
0	99	CLEDDTQSQLLDADGFLNVR	Cyano(C)@1	cleaved F-C@N-term	-0.0006	2276.04	3	24	1.1.1.1873.11	Winner
0	98.7	ENMEELLNLCSGK	Cys->Dha(C)@10		0.0008	1444.69	2	13	1.1.1.1696.14	Winner
0	98.3	ENMEELLNLCSGK	Cys->Dha(C)@10		0.0088	1444.7	2	11	1.1.1.1736.12	Winner
0	97.8	ENMEELLNLCSGK	Cys->Dha(C)@10		0.0008	1444.69	2	12	1.1.1.1701.15	Winner
0	96.6	ENMEELLNLCSGK	Cys->Dha(C)@10		0.0008	1444.69	2	11	1.1.1.1706.13	Winner
0	90.3	ENMEELLNLCSGK	Cys->Dha(C)@10		0.0008	1444.69	2	9	1.1.1.1691.17	Winner
0	41.6	ENMEELLNLCSGK	Cys->Dha(C)@10		0.002	1444.69	2	9	1.1.1.1729.10	Winner
0	55.6	QPSKLDEDDSCSLLTK	Cys->Dha(C)@11	missed K-L@4	0.0017	1743.85	3	9	1.1.1.1243.11	Winner
0	9	QPSKLDEDDSCSLLTK	Cys->Dha(C)@11	missed K-L@4	0.0017	1743.85	3	9	1.1.1.1238.12	Winner
2	99	ETQIITGSDESCR	Cys->Dha(C)@12		-0.0012	1403.65	2	19	1.1.1.1046.15	Winner
0	99	ETQIITGSDESCR	Cys->Dha(C)@12		-0.0012	1403.65	2	17	1.1.1.1040.10	Winner
0	99	ETQIITGSDESCR	Cys->Dha(C)@12		-0.0012	1403.65	2	14	1.1.1.1056.12	Winner
0	99	ETQIITGSDESCR	Cys->Dha(C)@12		-0.0012	1403.65	2	17	1.1.1.1051.14	Winner
0	99	ETQIITGSDESCRK	Cys->Dha(C)@12	missed R-K@13	-0.0014	1531.75	3	13	1.1.1.942.6	Winner
0	99	ETQIITGSDESCRK	Cys->Dha(C)@12	missed R-K@13	-0.0014	1531.75	3	12	1.1.1.952.6	Winner
0	99	ETQIITGSDESCRK	Cys->Dha(C)@12	missed R-K@13	-0.0014	1531.75	3	13	1.1.1.954.9	Winner
2	99	ETQIITGSDESCRK	Cys->Dha(C)@12	missed R-K@13	-0.0014	1531.75	3	14	1.1.1.948.9	Winner
0	98.7	ETQIITGSDESCRK	Cys->Dha(C)@12	missed R-K@13	-0.0014	1531.75	3	11	1.1.1.959.6	Winner
0	96.9	ETQIITGSDESCRK	Cys->Dha(C)@12	missed R-K@13	-0.0014	1531.75	3	11	1.1.1.946.5	Winner
2	99	SETDENSGKQPSKLDEDDSCSLLTK	Cys->Dha(C)@20	missed K-Q@9; missed K-L@13	-0.0007	2691.24	4	15	1.1.1.1206.11	Winner
0	96.9	SETDENSGKQPSKLDEDDSCSLLTK	Cys->Dha(C)@20	missed K-Q@9; missed K-L@13	0.0037	2691.24	4	9	1.1.1.1261.20	Winner
0	21	PTCHGNAMALLK	Cys->Dha(C)@3; Oxidation(M)@8	cleaved R-P@N-term	0.0005	1236.63	3	6	1.1.1.983.2	Winner
0	99	LDEDDSCSLLTK	Cys->Dha(C)@7		0.0004	1303.61	2	11	1.1.1.1285.8	Winner
0	99	LDEDDSCSLLTK	Cys->Dha(C)@7		0.0006	1303.62	2	9	1.1.1.1280.13	Winner
0	99	NASRPMVIQESK	Deamidated(N)@1		-0.0012	1359.68	3	10	1.1.1.1021.4	Winner
0	99	NASRPMVIQESK	Deamidated(N)@1		0.0018	1359.68	3	11	1.1.1.1051.5	Winner
0	99	NASRPMVIQESK	Deamidated(N)@1		0.0018	1359.68	3	14	1.1.1.1056.3	Winner
0	99	NASRPMVIQESK	Deamidated(N)@1		0.0018	1359.68	3	13	1.1.1.1061.4	Winner
0	99	NQYQALKPR	Deamidated(N)@1		-0.0003	1117.59	2	11	1.1.1.1039.11	Winner
0	99	NQYQALKPR	Deamidated(N)@1		-0.0003	1117.59	2	14	1.1.1.1033.15	Winner
0	99	NQYQALKPR	Deamidated(N)@1		-0.0005	1117.59	2	8	1.1.1.1027.16	Winner
0	99	NQYQALKPR	Deamidated(N)@1		0.0005	1117.59	2	11	1.1.1.969.10	Winner
0	99	NQYQALKPR	Deamidated(N)@1		0	1117.59	2	11	1.1.1.984.9	Winner
0	99	NQYQALKPR	Deamidated(N)@1		0	1117.59	2	12	1.1.1.979.10	Winner
0	97.9	NASRPMVIQESK	Deamidated(N)@1		-0.0003	1359.68	3	9	1.1.1.1046.7	Winner
0	97.1	NQYQALKPR	Deamidated(N)@1		0	1117.59	2	9	1.1.1.1046.12	Winner
0	85.9	NASRPMVIQESK	Deamidated(N)@1		-0.0012	1359.68	3	9	1.1.1.1015.7	Winner
0	61.8	NQYQALKPR	Deamidated(N)@1		0.0023	1117.59	2	7	1.1.1.974.11	Winner
0	99	NASRPMVIQESK	Deamidated(N)@1; Deamidated(R)@4; Oxidation(P)@5; Oxidation(M)@6		0.012	1392.67	2	11	1.1.1.958.14	Winner
0	96.9	NASRPMVIQESK	Deamidated(N)@1; Deamidated(R)@4; Oxidation(P)@5; Oxidation(M)@6		0.012	1392.67	2	10	1.1.1.953.15	Winner
0	99	NASRPMVIQESK	Deamidated(N)@1; Oxidation(M)@6		-0.0013	1375.68	2	14	1.1.1.949.10	Winner
0	99	NASRPMVIQESK	Deamidated(N)@1; Oxidation(M)@6		0.0011	1375.68	3	15	1.1.1.923.3	Winner
0	99	NASRPMVIQESK	Deamidated(N)@1; Oxidation(M)@6		0.0011	1375.68	3	14	1.1.1.928.3	Winner
0	99	NASRPMVIQESK	Deamidated(N)@1; Oxidation(M)@6		-0.0001	1375.68	3	13	1.1.1.960.4	Winner
0	99	NASRPMVIQESK	Deamidated(N)@1; Oxidation(M)@6		0.0002	1375.68	3	16	1.1.1.955.6	Winner
0	98.7	NASRPMVIQESK	Deamidated(N)@1; Oxidation(M)@6		-0.0001	1375.68	3	12	1.1.1.965.6	Winner
0	98	NASRPMVIQESK	Deamidated(N)@1; Oxidation(M)@6		0.0011	1375.68	3	12	1.1.1.933.3	Winner
0	27.1	NASRPMVIQESK	Deamidated(N)@1; Oxidation(P)@5; Oxidation(M)@6		0.0028	1391.67	3	9	1.1.1.982.4	Winner
0	99	NFVFHTLSPVK	Deamidated(N)@1; Phospho(S)@8		0.0036	1368.65	2	10	1.1.1.1732.8	Winner
0	99	NFVFHTLSPVK	Deamidated(N)@1; Phospho(S)@8		0.0052	1368.65	2	12	1.1.1.1727.9	Winner
0	99	NFVFHTLSPVK	Deamidated(N)@1; Phospho(S)@8		0.007	1368.65	2	8	1.1.1.1748.12	Winner
0	99	NFVFHTLSPVKAEAAK	Deamidated(N)@1; Phospho(S)@8	missed K-A@11	0.0024	1838.9	3	19	1.1.1.1622.5	Winner
0	99	NFVFHTLSPVKAEAAK	Deamidated(N)@1; Phospho(S)@8	missed K-A@11	0.0033	1838.9	3	12	1.1.1.1607.11	Winner
0	99	NFVFHTLSPVKAEAAK	Deamidated(N)@1; Phospho(S)@8	missed K-A@11	0.0026	1838.9	3	19	1.1.1.1613.7	Winner
0	99	NFVFHTLSPVKAEAAK	Deamidated(N)@1; Phospho(S)@8	missed K-A@11	0.0026	1838.9	3	15	1.1.1.1619.11	Winner
0	99	NFVFHTLSPVKAEAAK	Deamidated(N)@1; Phospho(S)@8	missed K-A@11	0.0026	1838.9	3	16	1.1.1.1617.9	Winner
0	97.6	NFVFHTLSPVK	Deamidated(N)@1; Phospho(S)@8		0.0004	1368.65	2	9	1.1.1.1743.7	Winner
0	90.7	NFVFHTLSPVKAEAAK	Deamidated(N)@1; Phospho(S)@8	missed K-A@11	0.0026	1838.9	3	10	1.1.1.1612.9	Winner
0	81.9	NFVFHTLSPVKAEAAK	Deamidated(N)@1; Phospho(S)@8	missed K-A@11	0.0077	1838.9	3	8	1.1.1.1642.14	Winner
0	35.4	NFVFHTLSPVK	Deamidated(N)@1; Phospho(S)@8		0.0004	1368.65	2	8	1.1.1.1737.8	Winner
0	99	GSEQTTGAENEVETNALPVVSK	Deamidated(N)@10		-0.0028	2260.07	2	18	1.1.1.1349.14	Winner
0	99	GSEQTTGAENEVETNALPVVSK	Deamidated(N)@10		-0.0031	2260.07	2	21	1.1.1.1350.16	Winner
0	99	GSEQTTGAENEVETNALPVVSK	Deamidated(N)@10		-0.0047	2260.07	3	17	1.1.1.1377.18	Winner
0	99	GSEQTTGAENEVETNALPVVSK	Deamidated(N)@10		-0.0033	2260.07	2	21	1.1.1.1351.8	Winner
2	99	GSEQTTGAENEVETNALPVVSK	Deamidated(N)@10		-0.0051	2260.07	3	26	1.1.1.1342.14	Winner
0	99	GSEQTTGAENEVETNALPVVSK	Deamidated(N)@10		-0.0031	2260.07	2	16	1.1.1.1348.14	Winner
0	99	GSEQTTGAENEVETNALPVVSK	Deamidated(N)@10		-0.0018	2260.07	3	26	1.1.1.1347.12	Winner
0	99	GSEQTTGAENEVETNALPVVSK	Deamidated(N)@10		-0.0021	2260.07	3	29	1.1.1.1421.11	Winner
0	99	GSEQTTGAENEVETNALPVVSK	Deamidated(N)@10		-0.0051	2260.07	3	27	1.1.1.1352.15	Winner
0	99	GSEQTTGAENEVETNALPVVSK	Deamidated(N)@10		-0.0001	2260.07	2	12	1.1.1.1423.15	Winner
0	99	GSEQTTGAENEVETNALPVVSK	Deamidated(N)@10		-0.0001	2260.07	2	16	1.1.1.1416.14	Winner
0	67.2	GSEQTTGAENEVETNALPVVSK	Deamidated(N)@10		-0.0001	2260.07	2	6	1.1.1.1422.21	Winner
0	99	EIIDTANTTEMNSDHHSK	Deamidated(N)@12		0.0114	2042.9	4	14	1.1.1.1065.10	Winner
0	99	EIIDTANTTEMNSDHHSK	Deamidated(N)@12		0.0068	2042.89	3	18	1.1.1.1064.7	Winner
0	96.7	EIIDTANTTEMNSDHHSK	Deamidated(N)@12		0.001	2042.89	4	12	1.1.1.1075.10	Winner
0	77.5	EIIDTANTTEMNSDHHSK	Deamidated(N)@12		0.0114	2042.9	4	11	1.1.1.1060.14	Winner
0	99	FTSQDASTPASSELNKQEK	Deamidated(N)@15	missed K-Q@16	-0.0002	2067.96	3	21	1.1.1.1116.10	Winner
0	99	FTSQDASTPASSELNKQEK	Deamidated(N)@15	missed K-Q@16	-0.0002	2067.96	3	18	1.1.1.1111.16	Winner
0	99	FTSQDASTPASSELNKQEK	Deamidated(N)@15	missed K-Q@16	0.0038	2067.96	3	19	1.1.1.1058.14	Winner
0	99	FTSQDASTPASSELNKQEK	Deamidated(N)@15	missed K-Q@16	0.0038	2067.96	3	15	1.1.1.1053.13	Winner
0	99	GSEQTTGAENEVETNALPVVSK	Deamidated(N)@15		-0.0031	2260.07	2	18	1.1.1.1361.14	Winner
0	99	GSEQTTGAENEVETNALPVVSK	Deamidated(N)@15		-0.0031	2260.07	2	22	1.1.1.1363.9	Winner
0	99	GSEQTTGAENEVETNALPVVSK	Deamidated(N)@15		-0.0031	2260.07	2	21	1.1.1.1360.11	Winner
0	99	GSEQTTGAENEVETNALPVVSK	Deamidated(N)@15		-0.0031	2260.07	2	9	1.1.1.1366.19	Winner
0	99	GSEQTTGAENEVETNALPVVSK	Deamidated(N)@15		-0.0031	2260.07	2	20	1.1.1.1364.16	Winner
0	99	GSEQTTGAENEVETNALPVVSK	Deamidated(N)@15		-0.0031	2260.07	2	17	1.1.1.1354.16	Winner
0	99	GSEQTTGAENEVETNALPVVSK	Deamidated(N)@15		-0.0031	2260.07	2	15	1.1.1.1365.15	Winner
0	99	GSEQTTGAENEVETNALPVVSK	Deamidated(N)@15		-0.0031	2260.07	2	17	1.1.1.1355.12	Winner
0	99	GSEQTTGAENEVETNALPVVSK	Deamidated(N)@15		-0.0031	2260.07	2	21	1.1.1.1359.17	Winner
0	99	GSEQTTGAENEVETNALPVVSK	Deamidated(N)@15		-0.0031	2260.07	2	23	1.1.1.1356.9	Winner
0	99	GSEQTTGAENEVETNALPVVSK	Deamidated(N)@15		-0.0031	2260.07	2	24	1.1.1.1358.11	Winner
0	99	GSEQTTGAENEVETNALPVVSK	Deamidated(N)@15		-0.003	2260.07	3	13	1.1.1.1443.10	Winner
0	99	GSEQTTGAENEVETNALPVVSK	Deamidated(N)@15		-0.0018	2260.07	3	27	1.1.1.1362.15	Winner
0	99	GSEQTTGAENEVETNALPVVSK	Deamidated(N)@15		-0.0018	2260.07	3	23	1.1.1.1367.15	Winner
0	99	GSEQTTGAENEVETNALPVVSK	Deamidated(N)@15		-0.0018	2260.07	3	15	1.1.1.1372.21	Winner
0	99	GSEQTTGAENEVETNALPVVSK	Deamidated(N)@15		-0.0018	2260.07	3	29	1.1.1.1357.15	Winner
0	99	GSEQTTGAENEVETNALPVVSK	Deamidated(N)@15		-0.003	2260.07	3	25	1.1.1.1434.14	Winner
0	99	GSEQTTGAENEVETNALPVVSK	Deamidated(N)@15		-0.003	2260.07	3	26	1.1.1.1440.13	Winner
0	99	GSEQTTGAENEVETNALPVVSK	Deamidated(N)@15		0.0001	2260.07	2	11	1.1.1.1438.21	Winner
0	99	GSEQTTGAENEVETNALPVVSK	Deamidated(N)@15		0.0001	2260.07	2	15	1.1.1.1435.16	Winner
0	99	GSEQTTGAENEVETNALPVVSK	Deamidated(N)@15		0.0001	2260.07	2	16	1.1.1.1437.12	Winner
0	99	GSEQTTGAENEVETNALPVVSK	Deamidated(N)@15		0.0001	2260.07	2	13	1.1.1.1436.14	Winner
0	99	GSEQTTGAENEVETNALPVVSK	Deamidated(N)@15		0.0001	2260.07	2	15	1.1.1.1429.16	Winner
0	78.3	GSEQTTGAENEVETNALPVVSK	Deamidated(N)@15; Oxidation(P)@18		0.0485	2276.11	3	12	1.1.1.1397.16	Winner
0	78.3	GSEQTTGAENEVETNALPVVSK	Deamidated(N)@15; Oxidation(P)@18		0.0485	2276.11	3	12	1.1.1.1403.17	Winner
0	99	LGADEDSFVILEPETNRELEALK	Deamidated(N)@16	missed R-E@17	0.0051	2588.29	3	12	1.1.1.1805.11	Winner
0	99	LGADEDSFVILEPETNRELEALK	Deamidated(N)@16	missed R-E@17	0.0051	2588.29	3	22	1.1.1.1800.7	Winner
0	99	LSEPSLPIEDSQDLYNASPEPK	Deamidated(N)@16		0.0071	2429.16	3	18	1.1.1.1680.16	Winner
0	99	LSEPSLPIEDSQDLYNASPEPK	Deamidated(N)@16		0.0003	2429.15	3	17	1.1.1.1632.17	Winner
0	99	LSEPSLPIEDSQDLYNASPEPK	Deamidated(N)@16		-0.0039	2429.14	3	18	1.1.1.1638.10	Winner
0	99	DLVKNEELEIQEK	Deamidated(N)@5	missed K-N@4	0.0016	1586.81	3	18	1.1.1.1304.11	Winner
0	99	DLVKNEELEIQEK	Deamidated(N)@5	missed K-N@4	0.0016	1586.81	3	16	1.1.1.1294.6	Winner
0	99	DLVKNEELEIQEK	Deamidated(N)@5	missed K-N@4	0.0003	1586.8	3	15	1.1.1.1377.9	Winner
0	99	DLVKNEELEIQEK	Deamidated(N)@5	missed K-N@4	0.0003	1586.8	3	17	1.1.1.1382.7	Winner
0	99	DLVKNEELEIQEK	Deamidated(N)@5	missed K-N@4	0.0016	1586.81	3	16	1.1.1.1299.12	Winner
0	99	DLVKNEELEIQEK	Deamidated(N)@5	missed K-N@4	0.0019	1586.81	3	16	1.1.1.1387.5	Winner
0	96.3	ESALNLPYHMPENK	Deamidated(N)@5		0.0011	1642.77	3	11	1.1.1.1457.11	Winner
0	95.2	ESALNLPYHMPENK	Deamidated(N)@5		0.0033	1642.77	3	11	1.1.1.1451.5	Winner
0	93.1	DLVKNEELEIQEK	Deamidated(N)@5	missed K-N@4	0.0016	1586.81	3	11	1.1.1.1309.10	Winner
0	33.5	DLVKNEELEIQEK	Deamidated(N)@5	missed K-N@4	0.0016	1586.81	3	9	1.1.1.1289.6	Winner
0	99	ESALNLPYHMPENK	Deamidated(N)@5; Oxidation(M)@10		0.0029	1658.76	3	14	1.1.1.1288.12	Winner
0	87.3	ESALNLPYHMPENK	Deamidated(N)@5; Oxidation(M)@10		0.0029	1658.76	3	11	1.1.1.1300.8	Winner
0	99	TGSLLNQPK	Deamidated(N)@6		0.0004	957.514	2	11	1.1.1.1060.9	Winner
2	99	TGSLLNQPK	Deamidated(N)@6		0.0037	957.517	2	14	1.1.1.1039.7	Winner
0	98.3	TGSLLNQPK	Deamidated(N)@6		0.0002	957.513	2	11	1.1.1.1050.10	Winner
0	95.1	TGSLLNQPK	Deamidated(N)@6		0.0004	957.514	2	9	1.1.1.1065.6	Winner
0	88.6	TGSLLNQPK	Deamidated(N)@6		0.0006	957.514	2	8	1.1.1.1070.8	Winner
0	76.6	TGSLLNQPK	Deamidated(N)@6		0.0002	957.513	2	10	1.1.1.1045.6	Winner
0	99	EIIDTANTTEMNSDHHSK	Deamidated(N)@7		0.007	2042.89	4	13	1.1.1.1070.11	Winner
0	96.7	EIIDTANTTEMNSDHHSK	Deamidated(N)@7		0.001	2042.89	4	12	1.1.1.1080.11	Winner
0	99	EIIDTANTTEMNSDHHSK	Deamidated(N)@7; Oxidation(M)@11		0.004	2058.88	4	14	1.1.1.976.3	Winner
0	99	EIIDTANTTEMNSDHHSK	Deamidated(N)@7; Oxidation(M)@11		0.0005	2058.88	3	17	1.1.1.976.7	Winner
0	76.6	EIIDTANTTEMNSDHHSK	Deamidated(N)@7; Oxidation(M)@11		0.001	2058.88	4	11	1.1.1.981.5	Winner
0	99	AGQTVNVNVIVK	Deamidated(N)@8		0.0011	1241.7	2	12	1.1.1.1245.11	Winner
0	99	AGQTVNVNVIVK	Deamidated(N)@8		0.0011	1241.7	2	15	1.1.1.1240.10	Winner
0	99	LAALSDHNPSAPR	Deamidated(N)@8		0.0039	1348.68	3	12	1.1.1.1067.6	Winner
0	74.2	AGQTVNVNVIVK	Deamidated(N)@8		0.0037	1241.7	2	9	1.1.1.1288.14	Winner
0	10.9	SETDENSGKQPSKLDEDDSCSLLTK	Deamidated(Q)@10; Propionamide(C)@20	missed K-Q@9; missed K-L@13	0.0019	2797.25	4	8	1.1.1.1233.14	Winner
0	99	DLVKNEELEIQEK	Deamidated(Q)@11	missed K-N@4	0.0013	1586.81	2	15	1.1.1.1367.17	Winner
0	99	DLVKNEELEIQEK	Deamidated(Q)@11	missed K-N@4	0.0003	1586.8	3	15	1.1.1.1372.11	Winner
0	99	NPFEAIRPGSAQQVK	Deamidated(Q)@12		0.0029	1641.85	2	13	1.1.1.1298.12	Winner
0	85.4	NPFEAIRPGSAQQVK	Deamidated(Q)@12		0.002	1641.85	3	11	1.1.1.1308.6	Winner
0	99	NPFEAIRPGSAQQVK	Deamidated(Q)@13		0.0014	1641.85	3	14	1.1.1.1303.10	Winner
0	97.5	NPFEAIRPGSAQQVK	Deamidated(Q)@13		0.0183	1641.87	3	12	1.1.1.1265.10	Winner
0	97.5	NPFEAIRPGSAQQVK	Deamidated(Q)@13		0.002	1641.85	3	12	1.1.1.1295.10	Winner
0	99	FTSQDASTPASSELNKQEK	Deamidated(Q)@17	missed K-Q@16	-0.0002	2067.96	3	20	1.1.1.1121.9	Winner
0	77.2	FTSQDASTPASSELNKQEK	Deamidated(Q)@17	missed K-Q@16	-0.0002	2067.96	3	11	1.1.1.1126.10	Winner
0	96.7	NQYQALKPR	Deamidated(Q)@2		0.0005	1117.59	2	10	1.1.1.959.9	Winner
0	99	FTSQDASTPASSELNK	Deamidated(Q)@4		0.0029	1682.77	2	19	1.1.1.1145.13	Winner
0	99	FTSQDASTPASSELNK	Deamidated(Q)@4		0.0029	1682.77	2	21	1.1.1.1140.13	Winner
0	99	FTSQDASTPASSELNK	Deamidated(Q)@4		0.0031	1682.77	2	10	1.1.1.1150.16	Winner
0	99	NQYQALKPR	Deamidated(Q)@4		0.0005	1117.59	2	12	1.1.1.964.11	Winner
0	37.7	PMVIQESK	Deamidated(Q)@5	cleaved R-P@N-term	0.0041	931.473	2	8	1.1.1.1007.3	Winner
0	96.8	TGSLLNQPK	Deamidated(Q)@7		0.0002	957.513	2	10	1.1.1.1055.7	Winner
0.05	49.1	ELEALKQR	Deamidated(Q)@7	missed K-Q@6	0.0008	986.54	2	8	1.1.1.975.6	Winner
0	27.1	ELEALKQR	Deamidated(Q)@7	missed K-Q@6	0.0008	986.54	2	6	1.1.1.970.7	Winner
0	36.3	NIDDASQMDLFHR	Deamidated(Q)@7; Oxidation(M)@8		0.0173	1577.7	3	9	1.1.1.1272.11	Winner
0	99	ETQIITGSDESCR	Dehydrated(E)@10; Phospho(S)@11; Methyl(C)@12		0.0275	1513.64	2	18	1.1.1.1143.13	Winner
0	21	KLDGASHTKPGEK	Dehydrated(E)@12	missed K-L@1	-0.0019	1348.71	3	10	1.1.1.609.3	Winner
0	99	ASLVSSASK	Delta:H(2)C(2)@N-term		0.001	874.477	2	10	1.1.1.884.3	Winner
0	99	LAALSDHNPSAPR	Delta:H(2)C(2)@N-term		0.0103	1373.72	3	12	1.1.1.1154.8	Winner
0	95.8	SSAVGPPEK	Delta:H(2)C(2)@N-term		0.005	896.466	2	8	1.1.1.879.2	Winner
0	55.6	SSAVGPPEK	Delta:H(2)C(2)@N-term		0.0016	896.462	2	9	1.1.1.872.3	Winner
0	29.2	ASLVSSASK	Delta:H(2)C(2)@N-term		0.0012	874.477	2	6	1.1.1.897.5	Winner
0	31.3	ESALNLPYHMPENK	Delta:H(2)C(2)@N-term; Oxidation(M)@10		-0.0032	1683.79	3	10	1.1.1.1342.8	Winner
0	97.7	SSAVGPPEK	Delta:H(4)C(2)(K)@9		0.0009	898.477	2	7	1.1.1.983.6	Winner
0	96.9	SSAVGPPEK	Delta:H(4)C(2)(K)@9		0.0009	898.477	2	7	1.1.1.978.8	Winner
0	94.4	SSAVGPPEK	Delta:H(4)C(2)(K)@9		0.0009	898.477	2	8	1.1.1.973.3	Winner
0	88.1	LGADEDSFVILEPETNR	Delta:H(4)C(2)@N-term		0.0021	1931.95	2	9	1.1.1.1825.21	Winner
0	53.9	VEEPEQQNK	Delta:H(4)C(2)@N-term		-0.0017	1127.54	2	10	1.1.1.856.5	Winner
0	5.1	VEEPEQQNK	Delta:H(4)C(2)@N-term		-0.0017	1127.54	2	8	1.1.1.861.5	Winner
0	97.8	GSEQTTGAENEVETNALPVVSK	Dimethyl(N)@10		0.0018	2287.12	3	16	1.1.1.1536.14	Winner
0	97.8	GSEQTTGAENEVETNALPVVSK	Dimethyl(N)@10		-0.0075	2287.11	3	16	1.1.1.1515.8	Winner
0	98.7	GSEQTTGAENEVETNALPVVSK	Dimethyl(N)@15		0.0023	2287.12	3	17	1.1.1.1542.9	Winner
0	97.8	LGADEDSFVILEPETNR	Dimethyl(R)@17		0.0018	1931.95	2	12	1.1.1.1819.12	Winner
0	99	MGYFPTEEK	Dioxidation(M)@1		-0.0009	1132.47	2	13	1.1.1.1198.5	Winner
2	99	MGYFPTEEK	Dioxidation(M)@1		-0.0009	1132.47	2	12	1.1.1.1204.10	Winner
0	99	MGYFPTEEK	Dioxidation(M)@1		-0.0009	1132.47	2	10	1.1.1.1210.9	Winner
0	95.8	MGYFPTEEK	Dioxidation(M)@1		-0.0003	1132.47	2	10	1.1.1.1192.4	Winner
0	99	ESALNLPYHMPENK	Dioxidation(M)@10		0.001	1673.77	3	11	1.1.1.1291.11	Winner
0	99	ESALNLPYHMPENK	Dioxidation(M)@10		0.001	1673.77	3	12	1.1.1.1306.9	Winner
0	99	ESALNLPYHMPENK	Dioxidation(M)@10		0.001	1673.77	3	13	1.1.1.1296.10	Winner
0	99	TVADSDESYMEK	Dioxidation(M)@10		0.0002	1405.56	2	12	1.1.1.934.10	Winner
0	99	TVADSDESYMEK	Dioxidation(M)@10		0.0002	1405.56	2	13	1.1.1.929.12	Winner
0	95.8	ESALNLPYHMPENK	Dioxidation(M)@10		0.001	1673.77	3	10	1.1.1.1301.8	Winner
0	23	ESALNLPYHMPENK	Dioxidation(M)@10		0.001	1673.77	3	7	1.1.1.1286.6	Winner
0	99	EIIDTANTTEMNSDHHSK	Dioxidation(M)@11		-0.0038	2073.89	3	15	1.1.1.966.8	Winner
0	99	EIIDTANTTEMNSDHHSK	Dioxidation(M)@11		-0.0038	2073.89	3	15	1.1.1.958.13	Winner
0	99	EIIDTANTTEMNSDHHSK	Dioxidation(M)@11		-0.0038	2073.89	3	16	1.1.1.967.11	Winner
0	99	EIIDTANTTEMNSDHHSK	Dioxidation(M)@11		-0.0038	2073.89	3	17	1.1.1.965.11	Winner
0	99	EIIDTANTTEMNSDHHSK	Dioxidation(M)@11		-0.0038	2073.89	3	15	1.1.1.964.13	Winner
0	99	EIIDTANTTEMNSDHHSK	Dioxidation(M)@11		-0.0029	2073.89	4	13	1.1.1.963.10	Winner
0	99	EIIDTANTTEMNSDHHSK	Dioxidation(M)@11		-0.0038	2073.89	3	15	1.1.1.968.10	Winner
0	98.7	EIIDTANTTEMNSDHHSK	Dioxidation(M)@11		-0.0029	2073.89	4	12	1.1.1.957.8	Winner
0	94.4	EIIDTANTTEMNSDHHSK	Dioxidation(M)@11		-0.0029	2073.89	4	11	1.1.1.968.8	Winner
0	29.2	EIIDTANTTEMNSDHHSK	Dioxidation(M)@11		-0.0029	2073.89	4	10	1.1.1.962.8	Winner
0	99	EIIDTANTTEMNSDHHSK	Dioxidation(M)@11; Deamidated(N)@12		0.0049	2074.88	4	13	1.1.1.976.5	Winner
0	99	LPLASMDENAMDANMDELLDLCTGK	Dioxidation(M)@11; Oxidation(M)@15; Trioxidation(C)@22; Formyl(K)@25		0.0226	2833.19	3	22	1.1.1.1830.17	Winner
0	99	LPLASMDENAMDANMDELLDLCTGK	Dioxidation(M)@11; Oxidation(M)@15; Trioxidation(C)@22; Formyl(K)@25		0.0226	2833.19	3	19	1.1.1.1825.20	Winner
0	98.7	LPLASMDENAMDANMDELLDLCTGK	Dioxidation(M)@11; Oxidation(M)@15; Trioxidation(C)@22; Formyl(K)@25		0.0226	2833.19	3	18	1.1.1.1820.16	Winner
0	97.8	LPLASMDENAMDANMDELLDLCTGK	Dioxidation(M)@11; Oxidation(M)@15; Trioxidation(C)@22; Formyl(K)@25		0.0193	2833.18	3	17	1.1.1.1835.18	Winner
0	92.1	LPLASMDENAMDANMDELLDLCTGK	Dioxidation(M)@11; Oxidation(M)@15; Trioxidation(C)@22; Formyl(K)@25		0.0193	2833.18	3	14	1.1.1.1841.16	Winner
0	99	DMGTDGKEELKADVVPVTLAPK	Dioxidation(M)@2	missed K-E@7; missed K-A@11	-0.0073	2344.18	3	17	1.1.1.1444.16	Winner
0	99	DMGTDGKEELKADVVPVTLAPK	Dioxidation(M)@2	missed K-E@7; missed K-A@11	-0.0073	2344.18	3	20	1.1.1.1446.7	Winner
0	99	DMGTDGKEELKADVVPVTLAPK	Dioxidation(M)@2	missed K-E@7; missed K-A@11	-0.0073	2344.18	3	25	1.1.1.1445.8	Winner
0	99	DMGTDGKEELKADVVPVTLAPK	Dioxidation(M)@2	missed K-E@7; missed K-A@11	-0.0018	2344.18	4	20	1.1.1.1443.7	Winner
0	99	DMGTDGKEELKADVVPVTLAPK	Dioxidation(M)@2	missed K-E@7; missed K-A@11	-0.0018	2344.18	4	19	1.1.1.1449.10	Winner
0	98.7	DMGTDGKEELKADVVPVTLAPK	Dioxidation(M)@2	missed K-E@7; missed K-A@11	-0.0073	2344.18	3	16	1.1.1.1448.11	Winner
0	98.3	DMGTDGKEELKADVVPVTLAPK	Dioxidation(M)@2	missed K-E@7; missed K-A@11	-0.0073	2344.18	3	15	1.1.1.1449.13	Winner
0	97.8	DMGTDGKEELKADVVPVTLAPK	Dioxidation(M)@2	missed K-E@7; missed K-A@11	-0.0073	2344.18	3	15	1.1.1.1437.10	Winner
0	93.6	DMGTDGKEELKADVVPVTLAPK	Dioxidation(M)@2	missed K-E@7; missed K-A@11	-0.0057	2344.18	4	13	1.1.1.1458.5	Winner
0	93.6	DMGTDGKEELKADVVPVTLAPK	Dioxidation(M)@2	missed K-E@7; missed K-A@11	-0.0021	2344.18	4	11	1.1.1.1436.6	Winner
0	99	RGPSFMTSPSPK	Dioxidation(M)@6	missed R-G@1	0.0027	1322.63	3	12	1.1.1.971.2	Winner
0	98.3	RGPSFMTSPSPK	Dioxidation(M)@6	missed R-G@1	0.0018	1322.63	3	7	1.1.1.978.7	Winner
0	89.8	PMVIQESK	Formyl@N-term	cleaved R-P@N-term	0.0017	958.481	2	9	1.1.1.892.4	Winner
0	14.9	PMVIQESK	Formyl@N-term	cleaved R-P@N-term	0.0011	958.481	2	8	1.1.1.881.4	Winner
0	99	PTCHGNAMALLK	Formyl@N-term; Dioxidation(C)@3; Oxidation(M)@8	cleaved R-P@N-term	-0.0008	1330.6	2	14	1.1.1.1117.13	Winner
0	99	PTCHGNAMALLK	Formyl@N-term; Dioxidation(C)@3; Oxidation(M)@8	cleaved R-P@N-term	-0.0008	1330.6	2	11	1.1.1.1112.14	Winner
0	99	QLGVDVSIKPR	Gln->pyro-Glu@N-term		-0.0024	1193.67	2	14	1.1.1.1452.6	Winner
0	99	QLGVDVSIKPR	Gln->pyro-Glu@N-term		-0.0005	1193.68	2	12	1.1.1.1483.9	Winner
0	99	QLGVDVSIKPR	Gln->pyro-Glu@N-term		-0.0024	1193.67	2	12	1.1.1.1454.6	Winner
0	99	QLGVDVSIKPR	Gln->pyro-Glu@N-term		-0.0005	1193.68	2	15	1.1.1.1478.10	Winner
0	99	QLGVDVSIKPR	Gln->pyro-Glu@N-term		-0.0003	1193.68	2	14	1.1.1.1488.5	Winner
0	99	QLGVDVSIKPR	Gln->pyro-Glu@N-term		-0.0005	1193.68	2	12	1.1.1.1508.4	Winner
0	99	QLGVDVSIKPR	Gln->pyro-Glu@N-term		-0.0005	1193.68	2	11	1.1.1.1518.4	Winner
0	99	QLGVDVSIKPR	Gln->pyro-Glu@N-term		-0.0003	1193.68	2	15	1.1.1.1468.11	Winner
0	99	QLGVDVSIKPR	Gln->pyro-Glu@N-term		-0.0024	1193.67	2	15	1.1.1.1463.7	Winner
0	99	QLGVDVSIKPR	Gln->pyro-Glu@N-term		-0.0031	1193.67	2	12	1.1.1.1513.9	Winner
0	99	QLGVDVSIKPR	Gln->pyro-Glu@N-term		-0.0024	1193.67	2	15	1.1.1.1470.9	Winner
2	99	QLGVDVSIKPR	Gln->pyro-Glu@N-term		-0.0024	1193.67	2	15	1.1.1.1458.6	Winner
0	99	QLGVDVSIKPR	Gln->pyro-Glu@N-term		-0.0003	1193.68	2	13	1.1.1.1473.10	Winner
0	99	QLGVDVSIKPR	Gln->pyro-Glu@N-term		0.0004	1193.68	2	13	1.1.1.1503.3	Winner
0	99	QLGVDVSIKPR	Gln->pyro-Glu@N-term		0.0003	1193.68	2	14	1.1.1.1493.5	Winner
0	99	QLGVDVSIKPR	Gln->pyro-Glu@N-term		0.0004	1193.68	2	13	1.1.1.1540.5	Winner
0	99	QLGVDVSIKPR	Gln->pyro-Glu@N-term		0.0003	1193.68	2	9	1.1.1.1546.9	Winner
0	99	QLGVDVSIKPR	Gln->pyro-Glu@N-term		0.0003	1193.68	2	11	1.1.1.1498.5	Winner
0	99	QLGVDVSIKPR	Gln->pyro-Glu@N-term		-0.0002	1193.68	2	12	1.1.1.1523.6	Winner
0	99	QLGVDVSIKPR	Gln->pyro-Glu@N-term		0.0001	1193.68	2	12	1.1.1.1528.6	Winner
0	99	QLHSETQR	Gln->pyro-Glu@N-term		-0.0001	980.467	2	12	1.1.1.827.3	Winner
0	99	QLHSETQR	Gln->pyro-Glu@N-term		-0.0015	980.466	2	10	1.1.1.847.3	Winner
0	99	QLHSETQR	Gln->pyro-Glu@N-term		0.0001	980.468	2	12	1.1.1.837.2	Winner
2	99	QLHSETQR	Gln->pyro-Glu@N-term		-0.0001	980.467	2	12	1.1.1.822.2	Winner
0	99	QLHSETQR	Gln->pyro-Glu@N-term		-0.0001	980.467	2	12	1.1.1.832.2	Winner
0	99	QYQALKPR	Gln->pyro-Glu@N-term	cleaved N-Q@N-term	0.0022	985.537	2	9	1.1.1.1148.6	Winner
0	98.3	QLHSETQR	Gln->pyro-Glu@N-term		-0.0011	980.466	2	11	1.1.1.842.2	Winner
0	98.3	QYQALKPR	Gln->pyro-Glu@N-term	cleaved N-Q@N-term	0.0017	985.536	2	9	1.1.1.928.6	Winner
0	95.8	QYQALKPR	Gln->pyro-Glu@N-term	cleaved N-Q@N-term	0.0017	985.536	2	9	1.1.1.923.5	Winner
0	90.5	QLHSETQR	Gln->pyro-Glu@N-term		-0.0017	980.466	2	7	1.1.1.853.5	Winner
0	53	QLGVDVSIKPR	Gln->pyro-Glu@N-term		-0.0031	1193.67	2	8	1.1.1.1513.8	Winner
0	38.7	QLGVDVSIKPR	Gln->pyro-Glu@N-term		0.0003	1193.68	2	8	1.1.1.1552.4	Winner
0	20.8	QLGVDVSIKPR	Gln->pyro-Glu@N-term		-0.0003	1193.68	2	5	1.1.1.1567.7	Winner
0	20.7	QLGVDVSIKPR	Gln->pyro-Glu@N-term		0.0003	1193.68	2	8	1.1.1.1533.5	Winner
0	10.9	QPSKLDEDDSCSLLTK	Gln->pyro-Glu@N-term; Cation:Na(E)@7; Propionamide(C)@11	missed K-L@4	0.0039	1853.84	3	10	1.1.1.1337.12	Winner
0	99	ESALNLPYHMPENK	Glu->pyro-Glu@N-term; Oxidation(M)@10		-0.0032	1639.76	2	13	1.1.1.1395.15	Winner
0	97.4	ESALNLPYHMPENK	Glu->pyro-Glu@N-term; Oxidation(M)@10		-0.003	1639.76	2	8	1.1.1.1388.18	Winner
0	29.8	ESALNLPYHMPENK	Glu->pyro-Glu@N-term; Oxidation(M)@10		-0.0032	1639.76	2	7	1.1.1.1400.18	Winner
0	99	EIIDTANTTEMNSDHHSK	Glu->pyro-Glu@N-term; Oxidation(M)@11		-0.0032	2039.88	3	12	1.1.1.1096.21	Winner
0	98.8	EIIDTANTTEMNSDHHSK	Glu->pyro-Glu@N-term; Oxidation(M)@11		-0.0032	2039.88	3	12	1.1.1.1102.18	Winner
0	88.1	ESSMGDPMEEALALCSGSFPTDKEEEDEEEEFGDFR	Glu->pyro-Glu@N-term; Oxidation(M)@4; Oxidation(M)@8; Cation:K(E)@10	missed K-E@23	-0.0135	4093.55	4	9	1.1.1.1844.12	Winner
0	99	ETQIITGSDESCRK	Glu->pyro-Glu@N-term; Propionamide(C)@12	missed R-K@13	0.0003	1618.76	3	10	1.1.1.958.10	Winner
0	29.2	HIHDKEGTAGK	Methylpyrroline(K)@5	missed K-E@5	-0.0003	1300.65	3	11	1.1.1.593.2	Winner
0	99	MGYFPTEEK	Oxidation(M)@1		0.0003	1116.48	2	14	1.1.1.1165.5	Winner
0	99	MGYFPTEEK	Oxidation(M)@1		-0.0004	1116.48	2	12	1.1.1.1201.7	Winner
0	99	MGYFPTEEK	Oxidation(M)@1		0.0003	1116.48	2	14	1.1.1.1177.4	Winner
0	99	MGYFPTEEK	Oxidation(M)@1		-0.0028	1116.48	2	11	1.1.1.1213.9	Winner
0	99	MGYFPTEEK	Oxidation(M)@1		-0.0004	1116.48	2	11	1.1.1.1207.11	Winner
0	99	MGYFPTEEK	Oxidation(M)@1		0	1116.48	2	13	1.1.1.1195.3	Winner
0	99	MGYFPTEEK	Oxidation(M)@1		0.0003	1116.48	2	13	1.1.1.1171.6	Winner
0	99	MGYFPTEEK	Oxidation(M)@1		0.0003	1116.48	2	13	1.1.1.1183.2	Winner
0	99	MGYFPTEEK	Oxidation(M)@1		0	1116.48	2	14	1.1.1.1189.7	Winner
0	99	MGYFPTEEKSETDENSGK	Oxidation(M)@1	missed K-S@9	0.0021	2063.86	3	19	1.1.1.1120.17	Winner
0	99	MGYFPTEEKSETDENSGK	Oxidation(M)@1	missed K-S@9	0.0021	2063.86	3	23	1.1.1.1115.13	Winner
0	99	MGYFPTEEKSETDENSGK	Oxidation(M)@1	missed K-S@9	0.0021	2063.86	3	20	1.1.1.1125.9	Winner
0	99	MGYFPTEEKSETDENSGK	Oxidation(M)@1	missed K-S@9	0.0021	2063.86	3	20	1.1.1.1110.13	Winner
0	99	MGYFPTEEKSETDENSGK	Oxidation(M)@1	missed K-S@9	0.0018	2063.86	3	18	1.1.1.1130.14	Winner
2	99	MGYFPTEEKSETDENSGKQPSK	Oxidation(M)@1	missed K-S@9; missed K-Q@18	0.0031	2504.1	4	16	1.1.1.1063.11	Winner
0	98.6	MGYFPTEEK	Oxidation(M)@1		-0.0026	1116.48	2	11	1.1.1.1219.7	Winner
0	98.2	MGYFPTEEK	Oxidation(M)@1		0	1116.48	2	10	1.1.1.1243.9	Winner
0	96.2	MGYFPTEEK	Oxidation(M)@1		0	1116.48	2	8	1.1.1.1233.9	Winner
0	91.6	MGYFPTEEK	Oxidation(M)@1		0.0025	1116.48	2	9	1.1.1.1238.10	Winner
0	88.6	MGYFPTEEKSETDENSGKQPSK	Oxidation(M)@1	missed K-S@9; missed K-Q@18	0.0031	2504.1	4	11	1.1.1.1068.10	Winner
0	87.9	MGYFPTEEKSETDENSGKQPSK	Oxidation(M)@1	missed K-S@9; missed K-Q@18	0.0031	2504.1	4	11	1.1.1.1058.13	Winner
0	77.2	MGYFPTEEK	Oxidation(M)@1		-0.0022	1116.48	2	8	1.1.1.1265.12	Winner
0	63	MGYFPTEEK	Oxidation(M)@1		0.0028	1116.48	2	6	1.1.1.1249.9	Winner
0	55.8	MGYFPTEEK	Oxidation(M)@1		0	1116.48	2	8	1.1.1.1159.7	Winner
0	30.8	MGYFPTEEK	Oxidation(M)@1		0.0026	1116.48	2	7	1.1.1.1274.8	Winner
0	10.9	MGYFPTEEK	Oxidation(M)@1		0.0003	1116.48	2	7	1.1.1.1169.8	Winner
0	99	MGYFPTEEKSETDENSGK	Oxidation(M)@1; Deamidated(N)@15	missed K-S@9	0.0065	2064.85	3	14	1.1.1.1143.12	Winner
0	99	MGYFPTEEKSETDENSGK	Oxidation(M)@1; Deamidated(N)@15	missed K-S@9	0.0065	2064.85	3	16	1.1.1.1136.12	Winner
0	96.9	MGYFPTEEK	Oxidation(M)@1; Oxidation(Y)@3		-0.001	1132.47	2	11	1.1.1.1019.2	Winner
0	99	ESALNLPYHMPENK	Oxidation(M)@10		0.0018	1657.78	3	16	1.1.1.1266.12	Winner
0	99	ESALNLPYHMPENK	Oxidation(M)@10		0.0018	1657.78	3	14	1.1.1.1261.12	Winner
0	99	ESALNLPYHMPENK	Oxidation(M)@10		0.0018	1657.78	3	15	1.1.1.1256.11	Winner
0	99	ESALNLPYHMPENK	Oxidation(M)@10		0.0018	1657.78	3	14	1.1.1.1272.14	Winner
0	99	TVADSDESYMEK	Oxidation(M)@10		-0.0019	1389.56	2	21	1.1.1.909.8	Winner
0	99	TVADSDESYMEK	Oxidation(M)@10		-0.0019	1389.56	2	21	1.1.1.904.5	Winner
0	99	TVADSDESYMEK	Oxidation(M)@10		-0.002	1389.56	2	13	1.1.1.934.9	Winner
0	99	TVADSDESYMEK	Oxidation(M)@10		-0.0025	1389.56	2	16	1.1.1.899.7	Winner
0	99	TVADSDESYMEK	Oxidation(M)@10		-0.0019	1389.56	2	11	1.1.1.929.11	Winner
0	99	TVADSDESYMEK	Oxidation(M)@10		-0.0019	1389.56	2	20	1.1.1.919.11	Winner
0	99	TVADSDESYMEK	Oxidation(M)@10		-0.0019	1389.56	2	21	1.1.1.914.8	Winner
0	99	TVADSDESYMEK	Oxidation(M)@10		-0.0019	1389.56	2	18	1.1.1.924.9	Winner
0	98.9	ESALNLPYHMPENK	Oxidation(M)@10		0.002	1657.78	3	12	1.1.1.1278.11	Winner
0	93.2	ESALNLPYHMPENK	Oxidation(M)@10		0.002	1657.78	3	11	1.1.1.1283.13	Winner
0	70.8	TVADSDESYMEK	Oxidation(M)@10		-0.002	1389.56	2	8	1.1.1.1054.10	Winner
0	38.7	ESALNLPYHMPENK	Oxidation(M)@10		0.002	1657.78	3	9	1.1.1.1251.13	Winner
0	33.8	TVADSDESYMEK	Oxidation(M)@10		-0.002	1389.56	2	7	1.1.1.1048.10	Winner
0	19.7	ESALNLPYHMPENK	Oxidation(M)@10		0.0022	1657.78	3	7	1.1.1.1394.8	Winner
0	99	TVADSDESYMEK	Oxidation(M)@10; Delta:H(4)C(2)(K)@12		0.0006	1417.59	2	9	1.1.1.1080.15	Winner
0	99	EIIDTANTTEMNSDHHSK	Oxidation(M)@11		-0.0051	2057.89	3	18	1.1.1.935.10	Winner
0	99	EIIDTANTTEMNSDHHSK	Oxidation(M)@11		-0.0051	2057.89	3	20	1.1.1.941.15	Winner
0	99	EIIDTANTTEMNSDHHSK	Oxidation(M)@11		-0.0027	2057.89	4	20	1.1.1.939.10	Winner
0	99	EIIDTANTTEMNSDHHSK	Oxidation(M)@11		-0.0027	2057.89	4	16	1.1.1.934.7	Winner
0	99	EIIDTANTTEMNSDHHSK	Oxidation(M)@11		-0.0027	2057.89	4	19	1.1.1.948.10	Winner
0	99	EIIDTANTTEMNSDHHSK	Oxidation(M)@11		-0.0051	2057.89	3	17	1.1.1.953.14	Winner
0	98.9	EIIDTANTTEMNSDHHSK	Oxidation(M)@11		-0.0044	2057.89	2	9	1.1.1.940.9	Winner
0	90	EIIDTANTTEMNSDHHSK	Oxidation(M)@11		0.0083	2057.9	4	11	1.1.1.986.8	Winner
0	66.7	EIIDTANTTEMNSDHHSK	Oxidation(M)@11		-0.0027	2057.89	4	10	1.1.1.929.9	Winner
0	33.8	EIIDTANTTEMNSDHHSK	Oxidation(M)@11		-0.0044	2057.89	2	6	1.1.1.942.11	Winner
0.02	21.9	EIIDTANTTEMN	Oxidation(M)@11	cleaved N-S@C-term	0.0056	1366.6	2	7	1.1.1.1123.8	Winner
0	99	EIIDTANTTEMNSDHHSK	Oxidation(M)@11; Deamidated(N)@12		0.001	2058.88	4	14	1.1.1.964.8	Winner
0	99	EIIDTANTTEMNSDHHSK	Oxidation(M)@11; Deamidated(N)@12		-0.0004	2058.88	3	18	1.1.1.956.8	Winner
0	99	EIIDTANTTEMNSDHHSK	Oxidation(M)@11; Deamidated(N)@12		0.0005	2058.88	3	18	1.1.1.966.7	Winner
0	99	EIIDTANTTEMNSDHHSK	Oxidation(M)@11; Deamidated(N)@12		-0.0004	2058.88	3	17	1.1.1.961.8	Winner
0	99	EIIDTANTTEMNSDHHSK	Oxidation(M)@11; Deamidated(N)@12		0.0111	2058.89	4	17	1.1.1.959.7	Winner
0	99	EIIDTANTTEMNSDHHSK	Oxidation(M)@11; Deamidated(N)@12		0.0133	2058.89	4	15	1.1.1.954.10	Winner
0	99	EIIDTANTTEMNSDHHSK	Oxidation(M)@11; Deamidated(N)@12		0.004	2058.88	4	15	1.1.1.971.5	Winner
0	99	LPLASMDENAMDANMDELLDLCTGK	Oxidation(M)@11; Oxidation(M)@15; Trioxidation(C)@22; Formyl(K)@25		0.0193	2817.19	3	20	1.1.1.1907.20	Winner
0	98.5	LPLASMDENAMDANMDELLDLCTGK	Oxidation(M)@11; Oxidation(M)@15; Trioxidation(C)@22; Formyl(K)@25		0.0198	2817.19	3	17	1.1.1.1917.16	Winner
0	99	ITAEEEEEIGEDSQFMILAK	Oxidation(M)@16		-0.0005	2297.06	3	19	1.1.1.1916.13	Winner
0	99	ITAEEEEEIGEDSQFMILAK	Oxidation(M)@16		-0.0009	2297.06	3	20	1.1.1.1891.11	Winner
0	99	ITAEEEEEIGEDSQFMILAK	Oxidation(M)@16		-0.0009	2297.06	3	23	1.1.1.1870.14	Winner
0	99	ITAEEEEEIGEDSQFMILAK	Oxidation(M)@16		-0.0065	2297.06	3	25	1.1.1.2224.5	Winner
0	99	ITAEEEEEIGEDSQFMILAK	Oxidation(M)@16		-0.012	2297.05	3	28	1.1.1.2630.4	Winner
0	99	ITAEEEEEIGEDSQFMILAK	Oxidation(M)@16		-0.0065	2297.06	3	30	1.1.1.2230.3	Winner
0	99	ITAEEEEEIGEDSQFMILAK	Oxidation(M)@16		-0.0009	2297.06	3	21	1.1.1.1875.13	Winner
0	99	ITAEEEEEIGEDSQFMILAK	Oxidation(M)@16		-0.0009	2297.06	3	11	1.1.1.1880.16	Winner
0	99	ITAEEEEEIGEDSQFMILAK	Oxidation(M)@16		0.0001	2297.06	3	19	1.1.1.1922.18	Winner
0	99	ITAEEEEEIGEDSQFMILAK	Oxidation(M)@16		0.0012	2297.06	3	15	1.1.1.1928.21	Winner
0	99	ITAEEEEEIGEDSQFMILAK	Oxidation(M)@16		0.0012	2297.06	3	22	1.1.1.1864.8	Winner
0	99	ITAEEEEEIGEDSQFMILAK	Oxidation(M)@16		0.0048	2297.07	3	14	1.1.1.1989.20	Winner
0	99	ITAEEEEEIGEDSQFMILAK	Oxidation(M)@16		0.0015	2297.06	3	17	1.1.1.1906.20	Winner
0	99	ITAEEEEEIGEDSQFMILAK	Oxidation(M)@16		0.001	2297.06	3	17	1.1.1.1897.18	Winner
0	99	ITAEEEEEIGEDSQFMILAK	Oxidation(M)@16		0.0004	2297.06	3	16	1.1.1.1946.19	Winner
0	99	ITAEEEEEIGEDSQFMILAK	Oxidation(M)@16		0.0043	2297.07	3	26	1.1.1.1738.9	Winner
0	99	ITAEEEEEIGEDSQFMILAK	Oxidation(M)@16		0.0043	2297.07	3	23	1.1.1.1780.14	Winner
0	99	ITAEEEEEIGEDSQFMILAK	Oxidation(M)@16		0.0043	2297.07	3	18	1.1.1.1775.21	Winner
0	99	ITAEEEEEIGEDSQFMILAK	Oxidation(M)@16		0.0043	2297.07	3	22	1.1.1.1754.10	Winner
0	99	ITAEEEEEIGEDSQFMILAK	Oxidation(M)@16		0.0029	2297.06	3	20	1.1.1.1819.10	Winner
0	99	ITAEEEEEIGEDSQFMILAK	Oxidation(M)@16		0.0045	2297.07	3	22	1.1.1.1765.13	Winner
0	99	ITAEEEEEIGEDSQFMILAK	Oxidation(M)@16		0.0045	2297.07	3	22	1.1.1.1813.10	Winner
0	99	ITAEEEEEIGEDSQFMILAK	Oxidation(M)@16		0.0029	2297.06	3	25	1.1.1.1718.11	Winner
0	99	ITAEEEEEIGEDSQFMILAK	Oxidation(M)@16		0.0029	2297.06	3	16	1.1.1.1678.12	Winner
0	99	ITAEEEEEIGEDSQFMILAK	Oxidation(M)@16		0.0043	2297.07	3	25	1.1.1.1743.8	Winner
0	99	ITAEEEEEIGEDSQFMILAK	Oxidation(M)@16		0.0034	2297.07	3	13	1.1.1.1835.14	Winner
0	99	ITAEEEEEIGEDSQFMILAK	Oxidation(M)@16		0.0021	2297.06	3	22	1.1.1.1847.15	Winner
0	99	ITAEEEEEIGEDSQFMILAK	Oxidation(M)@16		0.0025	2297.06	3	30	1.1.1.1688.12	Winner
0	99	ITAEEEEEIGEDSQFMILAK	Oxidation(M)@16		0.0025	2297.06	3	24	1.1.1.1693.14	Winner
0	99	ITAEEEEEIGEDSQFMILAK	Oxidation(M)@16		0.0034	2297.07	3	21	1.1.1.1824.6	Winner
0	99	ITAEEEEEIGEDSQFMILAK	Oxidation(M)@16		0.0036	2297.07	3	21	1.1.1.1732.10	Winner
0	99	ITAEEEEEIGEDSQFMILAK	Oxidation(M)@16		0.004	2297.07	3	21	1.1.1.1770.14	Winner
0	99	ITAEEEEEIGEDSQFMILAK	Oxidation(M)@16		0.0034	2297.07	3	24	1.1.1.1748.14	Winner
0	99	ITAEEEEEIGEDSQFMILAK	Oxidation(M)@16		0.0036	2297.07	3	23	1.1.1.1760.14	Winner
0	99	ITAEEEEEIGEDSQFMILAK	Oxidation(M)@16		0.0026	2297.07	2	21	1.1.1.1699.10	Winner
0	99	ITAEEEEEIGEDSQFMILAK	Oxidation(M)@16		0.0016	2297.06	3	23	1.1.1.1830.15	Winner
0	99	ITAEEEEEIGEDSQFMILAK	Oxidation(M)@16		0.0065	2297.07	2	11	1.1.1.1723.15	Winner
0	99	ITAEEEEEIGEDSQFMILAK	Oxidation(M)@16		0.0025	2297.06	3	19	1.1.1.1852.11	Winner
0	99	ITAEEEEEIGEDSQFMILAK	Oxidation(M)@16		0.002	2297.06	3	24	1.1.1.1713.10	Winner
0	99	ITAEEEEEIGEDSQFMILAK	Oxidation(M)@16		0.0057	2297.07	2	17	1.1.1.1692.16	Winner
0	99	ITAEEEEEIGEDSQFMILAK	Oxidation(M)@16		0.0021	2297.06	3	27	1.1.1.1683.10	Winner
0	99	ITAEEEEEIGEDSQFMILAK	Oxidation(M)@16		0.0057	2297.07	2	20	1.1.1.1694.10	Winner
0	99	ITAEEEEEIGEDSQFMILAK	Oxidation(M)@16		0.0057	2297.07	2	16	1.1.1.1689.14	Winner
0	99	ITAEEEEEIGEDSQFMILAK	Oxidation(M)@16		0.0021	2297.06	3	24	1.1.1.1698.16	Winner
0	99	ITAEEEEEIGEDSQFMILAK	Oxidation(M)@16		0.002	2297.06	3	18	1.1.1.1841.14	Winner
0	99	ITAEEEEEIGEDSQFMILAK	Oxidation(M)@16		0.002	2297.06	3	23	1.1.1.1708.17	Winner
0	99	ITAEEEEEIGEDSQFMILAK	Oxidation(M)@16		0.0021	2297.06	3	24	1.1.1.1703.15	Winner
0	99	ITAEEEEEIGEDSQFMILAK	Oxidation(M)@16		0.002	2297.06	3	23	1.1.1.1857.10	Winner
0	99	DMGTDGKEELKADVVPVTLAPK	Oxidation(M)@2	missed K-E@7; missed K-A@11	-0.0017	2328.19	4	22	1.1.1.1438.9	Winner
0	99	DMGTDGKEELKADVVPVTLAPK	Oxidation(M)@2	missed K-E@7; missed K-A@11	-0.0017	2328.19	4	23	1.1.1.1432.8	Winner
0	99	DMGTDGKEELKADVVPVTLAPK	Oxidation(M)@2	missed K-E@7; missed K-A@11	-0.0017	2328.19	4	22	1.1.1.1427.7	Winner
0	99	DMGTDGKEELKADVVPVTLAPK	Oxidation(M)@2	missed K-E@7; missed K-A@11	-0.0017	2328.19	4	12	1.1.1.1496.13	Winner
0	99	DMGTDGKEELKADVVPVTLAPK	Oxidation(M)@2	missed K-E@7; missed K-A@11	-0.0017	2328.19	4	21	1.1.1.1444.7	Winner
0	99	DMGTDGKEELKADVVPVTLAPK	Oxidation(M)@2	missed K-E@7; missed K-A@11	-0.0017	2328.19	4	13	1.1.1.1422.12	Winner
0	99	DMGTDGKEELKADVVPVTLAPK	Oxidation(M)@2	missed K-E@7; missed K-A@11	-0.0156	2328.17	4	13	1.1.1.2632.7	Winner
0	99	DMGTDGKEELKADVVPVTLAPK	Oxidation(M)@2	missed K-E@7; missed K-A@11	-0.001	2328.19	4	12	1.1.1.1501.9	Winner
0	99	DMGTDGKEELKADVVPVTLAPK	Oxidation(M)@2	missed K-E@7; missed K-A@11	-0.001	2328.19	4	15	1.1.1.1554.7	Winner
0	99	DMGTDGKEELKADVVPVTLAPK	Oxidation(M)@2	missed K-E@7; missed K-A@11	-0.0014	2328.19	4	10	1.1.1.1537.9	Winner
0	99	DMGTDGKEELKADVVPVTLAPK	Oxidation(M)@2	missed K-E@7; missed K-A@11	-0.0013	2328.19	3	19	1.1.1.1457.15	Winner
0	99	DMGTDGKEELKADVVPVTLAPK	Oxidation(M)@2	missed K-E@7; missed K-A@11	-0.0048	2328.18	3	29	1.1.1.1428.14	Winner
0	99	DMGTDGKEELKADVVPVTLAPK	Oxidation(M)@2	missed K-E@7; missed K-A@11	-0.0048	2328.18	3	16	1.1.1.1477.9	Winner
0	99	DMGTDGKEELKADVVPVTLAPK	Oxidation(M)@2	missed K-E@7; missed K-A@11	-0.0048	2328.18	3	28	1.1.1.1443.11	Winner
0	99	DMGTDGKEELKADVVPVTLAPK	Oxidation(M)@2	missed K-E@7; missed K-A@11	-0.0048	2328.18	3	31	1.1.1.1437.9	Winner
0	99	DMGTDGKEELKADVVPVTLAPK	Oxidation(M)@2	missed K-E@7; missed K-A@11	-0.0048	2328.18	3	33	1.1.1.1430.16	Winner
0	99	DMGTDGKEELKADVVPVTLAPK	Oxidation(M)@2	missed K-E@7; missed K-A@11	-0.0048	2328.18	3	31	1.1.1.1436.12	Winner
0	99	DMGTDGKEELKADVVPVTLAPK	Oxidation(M)@2	missed K-E@7; missed K-A@11	-0.0048	2328.18	3	31	1.1.1.1439.13	Winner
0	99	DMGTDGKEELKADVVPVTLAPK	Oxidation(M)@2	missed K-E@7; missed K-A@11	-0.0048	2328.18	3	35	1.1.1.1433.10	Winner
0	99	DMGTDGKEELKADVVPVTLAPK	Oxidation(M)@2	missed K-E@7; missed K-A@11	-0.0048	2328.18	3	27	1.1.1.1425.16	Winner
0	99	DMGTDGKEELKADVVPVTLAPK	Oxidation(M)@2	missed K-E@7; missed K-A@11	-0.0048	2328.18	3	24	1.1.1.1424.12	Winner
0	99	DMGTDGKEELKADVVPVTLAPK	Oxidation(M)@2	missed K-E@7; missed K-A@11	-0.0048	2328.18	3	29	1.1.1.1442.11	Winner
0	99	DMGTDGKEELKADVVPVTLAPK	Oxidation(M)@2	missed K-E@7; missed K-A@11	-0.0048	2328.18	3	27	1.1.1.1426.14	Winner
0	99	DMGTDGKEELKADVVPVTLAPK	Oxidation(M)@2	missed K-E@7; missed K-A@11	-0.0048	2328.18	3	30	1.1.1.1435.13	Winner
0	99	DMGTDGKEELKADVVPVTLAPK	Oxidation(M)@2	missed K-E@7; missed K-A@11	-0.0048	2328.18	3	29	1.1.1.1440.15	Winner
0	99	DMGTDGKEELKADVVPVTLAPK	Oxidation(M)@2	missed K-E@7; missed K-A@11	-0.0024	2328.19	4	14	1.1.1.1513.6	Winner
0	99	DMGTDGKEELKADVVPVTLAPK	Oxidation(M)@2	missed K-E@7; missed K-A@11	-0.0029	2328.19	4	15	1.1.1.1467.7	Winner
0	99	DMGTDGKEELKADVVPVTLAPK	Oxidation(M)@2	missed K-E@7; missed K-A@11	-0.0029	2328.19	4	14	1.1.1.1486.10	Winner
0	99	DMGTDGKEELKADVVPVTLAPK	Oxidation(M)@2	missed K-E@7; missed K-A@11	-0.0022	2328.19	4	21	1.1.1.1450.5	Winner
0	99	DMGTDGKEELKADVVPVTLAPK	Oxidation(M)@2	missed K-E@7; missed K-A@11	-0.0022	2328.19	4	13	1.1.1.1481.8	Winner
0	99	DMGTDGKEELKADVVPVTLAPK	Oxidation(M)@2	missed K-E@7; missed K-A@11	-0.0022	2328.19	4	17	1.1.1.1462.6	Winner
0	99	DMGTDGKEELKADVVPVTLAPK	Oxidation(M)@2	missed K-E@7; missed K-A@11	-0.0046	2328.18	3	15	1.1.1.1467.13	Winner
0	99	DMGTDGKEELKADVVPVTLAPK	Oxidation(M)@2	missed K-E@7; missed K-A@11	-0.0046	2328.18	3	23	1.1.1.1458.8	Winner
0	99	DMGTDGKEELKADVVPVTLAPK	Oxidation(M)@2	missed K-E@7; missed K-A@11	-0.0048	2328.18	3	30	1.1.1.1431.17	Winner
0	99	DMGTDGKEELKADVVPVTLAPK	Oxidation(M)@2	missed K-E@7; missed K-A@11	-0.0034	2328.19	4	13	1.1.1.1472.6	Winner
0	99	DMGTDGKEELKADVVPVTLAPK	Oxidation(M)@2	missed K-E@7; missed K-A@11	-0.0034	2328.19	4	16	1.1.1.1456.5	Winner
0	99	DMGTDGKEELKADVVPVTLAPK	Oxidation(M)@2	missed K-E@7; missed K-A@11	-0.0055	2328.18	3	14	1.1.1.1472.12	Winner
0	99	DMGTDGKEELKADVVPVTLAPK	Oxidation(M)@2	missed K-E@7; missed K-A@11	-0.0055	2328.18	3	28	1.1.1.1451.10	Winner
0	99	DMGTDGKEELKADVVPVTLAPK	Oxidation(M)@2	missed K-E@7; missed K-A@11	-0.0055	2328.18	3	28	1.1.1.1452.8	Winner
0	99	DMGTDGKEELKADVVPVTLAPK	Oxidation(M)@2	missed K-E@7; missed K-A@11	-0.0052	2328.18	3	18	1.1.1.1464.14	Winner
0	99	DMGTDGKEELKADVVPVTLAPK	Oxidation(M)@2	missed K-E@7; missed K-A@11	-0.0052	2328.18	3	10	1.1.1.1487.14	Winner
0	99	DMGTDGKEELKADVVPVTLAPK	Oxidation(M)@2	missed K-E@7; missed K-A@11	-0.0052	2328.18	3	23	1.1.1.1453.12	Winner
0	99	DMGTDGKEELKADVVPVTLAPK	Oxidation(M)@2	missed K-E@7; missed K-A@11	-0.0052	2328.18	3	11	1.1.1.1482.12	Winner
0	99	DMGTDGKEELKADVVPVTLAPK	Oxidation(M)@2	missed K-E@7; missed K-A@11	-0.0052	2328.18	3	28	1.1.1.1454.10	Winner
0	99	DMGTDGKEELKADVVPVTLAPK	Oxidation(M)@2	missed K-E@7; missed K-A@11	-0.0052	2328.18	3	25	1.1.1.1455.12	Winner
0	99	DMGTDGKEELKADVVPVTLAPK	Oxidation(M)@2	missed K-E@7; missed K-A@11	-0.0048	2328.18	3	27	1.1.1.1449.12	Winner
0	99	DMGTDGKEELKADVVPVTLAPK	Oxidation(M)@2	missed K-E@7; missed K-A@11	-0.0052	2328.18	3	19	1.1.1.1463.12	Winner
2	99	EMDKENNDGSSEIGK	Oxidation(M)@2	missed K-E@4	-0.0021	1667.69	3	15	1.1.1.766.2	Winner
0	99	EMDKENNDGSSEIGK	Oxidation(M)@2	missed K-E@4	-0.0018	1667.69	3	15	1.1.1.743.2	Winner
0	99	PMVIQESK	Oxidation(M)@2	cleaved R-P@N-term	-0.0008	946.479	2	12	1.1.1.843.3	Winner
0	99	PMVIQESK	Oxidation(M)@2	cleaved R-P@N-term	-0.0008	946.479	2	10	1.1.1.858.3	Winner
0	99	PMVIQESK	Oxidation(M)@2	cleaved R-P@N-term	-0.0008	946.479	2	11	1.1.1.853.3	Winner
0	99	PMVIQESK	Oxidation(M)@2	cleaved R-P@N-term	-0.0008	946.479	2	13	1.1.1.848.2	Winner
0	98.5	DMGTDGKEELKADVVPVTLAPK	Oxidation(M)@2	missed K-E@7; missed K-A@11	-0.0014	2328.19	4	11	1.1.1.1542.6	Winner
0	96.8	PMVIQESK	Oxidation(M)@2	cleaved R-P@N-term	-0.0014	946.478	2	9	1.1.1.890.4	Winner
0	96.3	DMGTDGKEELKADVVPVTLAPK	Oxidation(M)@2	missed K-E@7; missed K-A@11	-0.001	2328.19	4	9	1.1.1.1527.9	Winner
0	95.8	DMGTDGKEELKADVVPVTLAPK	Oxidation(M)@2	missed K-E@7; missed K-A@11	-0.0017	2328.19	4	11	1.1.1.1520.10	Winner
0	95.2	DMGTDGKEELKADVVPVTLAPK	Oxidation(M)@2	missed K-E@7; missed K-A@11	-0.001	2328.19	4	10	1.1.1.1532.7	Winner
0	78.6	PMVIQESK	Oxidation(M)@2	cleaved R-P@N-term	0.0028	946.482	2	8	1.1.1.880.4	Winner
0	66.4	PMVIQESK	Oxidation(M)@2	cleaved R-P@N-term	0.0086	946.488	2	8	1.1.1.929.6	Winner
0	50.5	DMGTDGKEELKADVVPVTLAPK	Oxidation(M)@2	missed K-E@7; missed K-A@11	-0.0036	2328.18	4	8	1.1.1.1658.4	Winner
0	46.9	DMGTDGKEELKADVVPVTLAPK	Oxidation(M)@2	missed K-E@7; missed K-A@11	-0.001	2328.19	4	9	1.1.1.1548.3	Winner
0	42.6	DMGTDGKEELKADVVPVTLAPK	Oxidation(M)@2	missed K-E@7; missed K-A@11	-0.0085	2328.18	4	9	1.1.1.1619.10	Winner
0	29.3	DMGTDGKEELKADVVPVTLAPK	Oxidation(M)@2	missed K-E@7; missed K-A@11	-0.0017	2328.19	4	9	1.1.1.1559.9	Winner
0	27.8	PMVIQESK	Oxidation(M)@2	cleaved R-P@N-term	0.0028	946.482	2	6	1.1.1.968.6	Winner
0	23.3	DMGTDGKEELK	Oxidation(M)@2	missed K-E@7	-0.0001	1237.55	3	7	1.1.1.793.3	Winner
0	21.7	DMGTDGKEELKADVVPVTLAPK	Oxidation(M)@2	missed K-E@7; missed K-A@11	-0.0024	2328.19	4	8	1.1.1.1491.11	Winner
0	20.8	DMGTDGKEELKADVVPVTLAPK	Oxidation(M)@2	missed K-E@7; missed K-A@11	0.002	2328.19	4	8	1.1.1.1740.9	Winner
0	14.4	PMVIQESK	Oxidation(M)@2	cleaved R-P@N-term	0.0018	946.481	2	5	1.1.1.974.6	Winner
0	91.3	DMGTDGKEELKADVV	Oxidation(M)@2; Dehydrated(D)@13	cleaved V-P@C-term; missed K-E@7; missed K-A@11	-0.0019	1603.74	2	12	1.1.1.1430.17	Winner
0	68.5	DMGTDGKEELKADVVPVTLAPKK	Oxidation(M)@2; Lys-loss@C-term	missed K-E@7; missed K-A@11; missed K-K@22	-0.0052	2328.18	3	10	1.1.1.1487.14	Winner
2	99	SFMTSPSPK	Oxidation(M)@3	cleaved P-S@N-term	0.0001	996.459	2	10	1.1.1.896.8	Winner
0	98.3	SFMTSPSPK	Oxidation(M)@3	cleaved P-S@N-term	0.0001	996.459	2	7	1.1.1.901.9	Winner
0	99	ENMEELLNLCSGK	Oxidation(M)@3; Cys->Dha(C)@10		0.0003	1460.68	2	14	1.1.1.1462.11	Winner
0	99	ENMEELLNLCSGK	Oxidation(M)@3; Cys->Dha(C)@10		0.0003	1460.68	2	15	1.1.1.1456.12	Winner
0	98.7	ENMEELLNLCSGK	Oxidation(M)@3; Cys->Dha(C)@10		-0.0003	1460.68	2	15	1.1.1.1450.10	Winner
0	98.3	ENMEELLNLCSGK	Oxidation(M)@3; Cys->Dha(C)@10		-0.0001	1460.68	2	13	1.1.1.1414.9	Winner
0	98.3	ENMEELLNLCSGK	Oxidation(M)@3; Cys->Dha(C)@10		-0.0001	1460.68	2	12	1.1.1.1409.9	Winner
0	95.8	ENMEELLNLCSGK	Oxidation(M)@3; Cys->Dha(C)@10		-0.0007	1460.68	2	11	1.1.1.1438.17	Winner
0	94.8	ENMEELLNLCSGK	Oxidation(M)@3; Cys->Dha(C)@10		-0.0007	1460.68	2	12	1.1.1.1432.17	Winner
0	93.6	ENMEELLNLCSGK	Oxidation(M)@3; Cys->Dha(C)@10		-0.0007	1460.68	2	10	1.1.1.1444.14	Winner
0	78.3	ENMEELLNLCSGK	Oxidation(M)@3; Cys->Dha(C)@10		-0.0001	1460.68	2	8	1.1.1.1404.9	Winner
0	73.8	ENMEELLNLCSGK	Oxidation(M)@3; Cys->Dha(C)@10		-0.0008	1460.68	2	8	1.1.1.1427.14	Winner
0	73.8	ENMEELLNLCSGK	Oxidation(M)@3; Dioxidation(C)@10		-0.0034	1526.66	2	8	1.1.1.1440.14	Winner
0	99	ENMEELLNLCSGK	Oxidation(M)@3; Propionamide(C)@10		-0.0028	1565.7	2	12	1.1.1.1437.11	Winner
0	15.8	ENMEELLNLCSGK	Oxidation(M)@3; Propionamide(C)@10		-0.0028	1565.7	2	8	1.1.1.1431.18	Winner
0	99	ENMEELLNLCSGK	Oxidation(M)@3; Trioxidation(C)@10		-0.0028	1542.65	2	19	1.1.1.1457.14	Winner
0	99	ENMEELLNLCSGK	Oxidation(M)@3; Trioxidation(C)@10		-0.0032	1542.65	2	21	1.1.1.1451.9	Winner
0	99	ENMEELLNLCSGK	Oxidation(M)@3; Trioxidation(C)@10		-0.002	1542.65	2	14	1.1.1.1463.11	Winner
2	99	ENMEELLNLCSGK	Oxidation(M)@3; Trioxidation(C)@10		-0.0032	1542.65	2	21	1.1.1.1445.7	Winner
0	98.7	ENMEELLNLCSGK	Oxidation(M)@3; Trioxidation(C)@10; Formyl(K)@13		0.0158	1570.66	2	17	1.1.1.1582.17	Winner
0	98.3	ENMEELLNLCSGK	Oxidation(M)@3; Trioxidation(C)@10; Formyl(K)@13		0.0158	1570.66	2	16	1.1.1.1577.16	Winner
0	94.8	ENMEELLNLCSGK	Oxidation(M)@3; Trioxidation(C)@10; Formyl(K)@13		0.0152	1570.66	2	13	1.1.1.1592.18	Winner
0	93.6	ENMEELLNLCSGK	Oxidation(M)@3; Trioxidation(C)@10; Formyl(K)@13		0.0158	1570.66	2	14	1.1.1.1572.17	Winner
0	90.3	ENMEELLNLCSGK	Oxidation(M)@3; Trioxidation(C)@10; Formyl(K)@13		0.0158	1570.66	2	13	1.1.1.1587.14	Winner
0	73.8	ENMEELLNLCSGK	Oxidation(M)@3; Trioxidation(C)@10; Formyl(K)@13		0.0158	1570.66	2	10	1.1.1.1567.14	Winner
2	99	SRPMVIQESK	Oxidation(M)@4	cleaved A-S@N-term	-0.0012	1189.61	2	12	1.1.1.868.6	Winner
0	99	SRPMVIQESK	Oxidation(M)@4	cleaved A-S@N-term	-0.0012	1189.61	2	12	1.1.1.873.9	Winner
0	52.3	SRPMVIQESK	Oxidation(M)@4	cleaved A-S@N-term	-0.0012	1189.61	2	8	1.1.1.880.5	Winner
2	99	ESSMGDPMEEALALCSGSFPTDKEEEDEEEEFGDFR	Oxidation(M)@4; Oxidation(M)@8; Propionamide(C)@15	missed K-E@23	0.0025	4144.65	4	22	1.1.1.1810.10	Winner
0	99	ESSMGDPMEEALALCSGSFPTDKEEEDEEEEFGDFR	Oxidation(M)@4; Oxidation(M)@8; Propionamide(C)@15	missed K-E@23	0.0035	4144.65	4	22	1.1.1.1816.14	Winner
0	99	KENMEELLNLCSGK	Oxidation(M)@4; Trioxidation(C)@11	missed K-E@1	-0.0027	1670.75	2	20	1.1.1.1330.15	Winner
2	99	KENMEELLNLCSGK	Oxidation(M)@4; Trioxidation(C)@11	missed K-E@1	-0.0027	1670.75	2	16	1.1.1.1336.11	Winner
0	99	KENMEELLNLCSGK	Oxidation(M)@4; Trioxidation(C)@11	missed K-E@1	-0.0027	1670.75	2	12	1.1.1.1325.21	Winner
0	76.2	KENMEELLNLCSGK	Oxidation(M)@4; Trioxidation(C)@11; Formyl(K)@14	missed K-E@1	0.0166	1698.76	3	11	1.1.1.1455.8	Winner
0	68.5	KENMEELLNLCSGK	Oxidation(M)@4; Trioxidation(C)@11; Formyl(K)@14	missed K-E@1	0.0166	1698.76	3	12	1.1.1.1449.9	Winner
0	99	DEKEMDKENNDGSSEIGK	Oxidation(M)@5	missed K-E@3; missed K-E@7	-0.0051	2039.85	4	20	1.1.1.791.2	Winner
0	99	DEKEMDKENNDGSSEIGK	Oxidation(M)@5	missed K-E@3; missed K-E@7	-0.0062	2039.85	3	23	1.1.1.789.4	Winner
2	99	DEKEMDKENNDGSSEIGK	Oxidation(M)@5	missed K-E@3; missed K-E@7	-0.0062	2039.85	3	25	1.1.1.790.3	Winner
0	99	DEKEMDKENNDGSSEIGK	Oxidation(M)@5	missed K-E@3; missed K-E@7	-0.0062	2039.85	3	18	1.1.1.788.6	Winner
0	99	DEKEMDKENNDGSSEIGK	Oxidation(M)@5	missed K-E@3; missed K-E@7	-0.0051	2039.85	4	18	1.1.1.786.3	Winner
0	99	DEKEMDKENNDGSSEIGK	Oxidation(M)@5	missed K-E@3; missed K-E@7	-0.0062	2039.85	3	25	1.1.1.787.3	Winner
0	99	GPSFMTSPSPK	Oxidation(M)@5		-0.0016	1150.53	2	18	1.1.1.1021.16	Winner
0	99	GPSFMTSPSPK	Oxidation(M)@5		-0.0016	1150.53	2	15	1.1.1.1027.17	Winner
0	99	GPSFMTSPSPK	Oxidation(M)@5		-0.0016	1150.53	2	16	1.1.1.1004.11	Winner
0	99	GPSFMTSPSPK	Oxidation(M)@5		-0.0016	1150.53	2	18	1.1.1.1015.16	Winner
0	99	GPSFMTSPSPK	Oxidation(M)@5		-0.0016	1150.53	2	18	1.1.1.1010.13	Winner
0.58	98	ASRPMVIQESK	Oxidation(M)@5	cleaved N-A@N-term	-0.0001	1260.65	3	11	1.1.1.859.4	Winner
0	97.7	ASRPMVIQESK	Oxidation(M)@5	cleaved N-A@N-term	-0.0001	1260.65	3	10	1.1.1.864.3	Winner
0	97.3	GPSFMTSPSPK	Oxidation(M)@5		-0.0006	1150.53	2	9	1.1.1.1035.14	Winner
0	96.9	ASRPMVIQESK	Oxidation(M)@5	cleaved N-A@N-term	-0.0001	1260.65	3	10	1.1.1.854.3	Winner
0	99	GPSFMTSPSPK	Oxidation(M)@5; Phospho(S)@9		0.0014	1230.5	2	10	1.1.1.1225.14	Winner
0	39.3	GPSFMTSPSPK	Oxidation(M)@5; Phospho(S)@9		0.0017	1230.5	2	7	1.1.1.1210.12	Winner
0	10.7	GPSFMTSPSPK	Oxidation(M)@5; Phospho(T)@6		0.0016	1230.5	2	7	1.1.1.1249.12	Winner
0	99	NASRPMVIQESK	Oxidation(M)@6		0.002	1374.69	3	14	1.1.1.882.3	Winner
2	99	NASRPMVIQESK	Oxidation(M)@6		0.002	1374.69	3	17	1.1.1.876.2	Winner
0	99	NASRPMVIQESK	Oxidation(M)@6		0.002	1374.69	3	15	1.1.1.870.4	Winner
0	99	NASRPMVIQESK	Oxidation(M)@6		0.0002	1374.69	3	12	1.1.1.888.4	Winner
0	99	RGPSFMTSPSPK	Oxidation(M)@6	missed R-G@1	0.0016	1306.64	3	14	1.1.1.954.5	Winner
0	99	RGPSFMTSPSPK	Oxidation(M)@6	missed R-G@1	0.0016	1306.64	3	12	1.1.1.948.4	Winner
0	99	RGPSFMTSPSPK	Oxidation(M)@6	missed R-G@1	0.0025	1306.64	3	13	1.1.1.959.3	Winner
0	96	NASRPMVIQESK	Oxidation(M)@6		0.002	1374.69	3	11	1.1.1.865.4	Winner
0	73	NASRPMVIQESK	Oxidation(M)@6		-0.0001	1374.69	3	10	1.1.1.903.3	Winner
0	60.3	RGPSFMTSPSPK	Oxidation(M)@6	missed R-G@1	-0.0026	1306.63	2	7	1.1.1.942.9	Winner
0	38.4	NASRPMVIQESK	Oxidation(M)@6		-0.001	1374.69	3	9	1.1.1.918.2	Winner
0	37	NASRPMVIQESK	Oxidation(M)@6		-0.0039	1374.69	3	9	1.1.1.913.4	Winner
0	37	NASRPMVIQESK	Oxidation(M)@6		-0.0048	1374.69	3	9	1.1.1.908.5	Winner
0	97.8	NASRPMVIQESK	Oxidation(M)@6; Deamidated(Q)@9		0.0038	1375.68	3	12	1.1.1.898.3	Winner
0	87.3	NASRPMVIQESK	Oxidation(M)@6; Deamidated(Q)@9		0.0038	1375.68	3	11	1.1.1.893.5	Winner
0	87.1	NASRPMVIQESK	Oxidation(M)@6; Deamidated(Q)@9		-0.0017	1375.67	2	9	1.1.1.894.10	Winner
0	99	LPLASMDENAMDANMDELLDLCTGK	Oxidation(M)@6; Oxidation(M)@11; Dioxidation(M)@15; Trioxidation(C)@22		0.0014	2821.17	3	19	1.1.1.1733.9	Winner
0	99	LPLASMDENAMDANMDELLDLCTGK	Oxidation(M)@6; Oxidation(M)@11; Oxidation(M)@15; Cys->Dha(C)@22		0.0009	2723.2	3	28	1.1.1.1705.10	Winner
2	99	LPLASMDENAMDANMDELLDLCTGK	Oxidation(M)@6; Oxidation(M)@11; Oxidation(M)@15; Cys->Dha(C)@22		0.0009	2723.2	3	25	1.1.1.1710.9	Winner
0	99	LPLASMDENAMDANMDELLDLCTGK	Oxidation(M)@6; Oxidation(M)@11; Oxidation(M)@15; Cys->Dha(C)@22		0.0009	2723.2	3	19	1.1.1.1715.17	Winner
0	99	LPLASMDENAMDANMDELLDLCTGK	Oxidation(M)@6; Oxidation(M)@11; Oxidation(M)@15; Trioxidation(C)@22		0.0014	2805.17	3	22	1.1.1.1709.11	Winner
0	99	LPLASMDENAMDANMDELLDLCTGK	Oxidation(M)@6; Oxidation(M)@11; Oxidation(M)@15; Trioxidation(C)@22		0.0014	2805.17	3	29	1.1.1.1699.9	Winner
0	99	LPLASMDENAMDANMDELLDLCTGK	Oxidation(M)@6; Oxidation(M)@11; Oxidation(M)@15; Trioxidation(C)@22		0.0014	2805.17	3	29	1.1.1.1704.8	Winner
0	70.8	RGPSFMTSPSPK	Oxidation(M)@6; Phospho(S)@10	missed R-G@1	-0.0035	1386.6	2	8	1.1.1.1114.9	Winner
0	21.7	RGPSFMTSPSPK	Oxidation(M)@6; Phospho(S)@10	missed R-G@1	-0.001	1386.6	2	6	1.1.1.1100.16	Winner
0	23.2	RGPSFMTSPSPK	Oxidation(M)@6; Phospho(S)@8	missed R-G@1	-0.0005	1386.6	2	6	1.1.1.1081.11	Winner
0.9	88.5	KRGPSFMTSPSPK	Oxidation(M)@7	missed K-R@1; missed R-G@2	-0.0014	1434.73	3	10	1.1.1.904.3	Winner
0	38.2	KRGPSFMTSPSPK	Oxidation(M)@7	missed K-R@1; missed R-G@2	-0.0023	1434.73	3	8	1.1.1.899.5	Winner
0	10.5	KRGPSFMTSPSPK	Oxidation(M)@7	missed K-R@1; missed R-G@2	-0.0014	1434.73	3	7	1.1.1.909.6	Winner
0	99	NIDDASQMDLFHR	Oxidation(M)@8		0.0005	1576.69	3	15	1.1.1.1276.7	Winner
2	99	NIDDASQMDLFHR	Oxidation(M)@8		0.0013	1576.7	2	17	1.1.1.1280.17	Winner
0	99	NIDDASQMDLFHR	Oxidation(M)@8		0.0005	1576.69	3	13	1.1.1.1270.9	Winner
0	99	NIDDASQMDLFHR	Oxidation(M)@8		0.0005	1576.69	3	13	1.1.1.1282.11	Winner
0	99	NIDDASQMDLFHR	Oxidation(M)@8		0.0005	1576.69	3	14	1.1.1.1287.8	Winner
0	94.1	NIDDASQMDLFHR	Oxidation(M)@8		0.0005	1576.69	3	11	1.1.1.1292.7	Winner
0	70.8	NIDDASQMDLFHR	Oxidation(M)@8		0.0029	1576.7	3	9	1.1.1.1298.9	Winner
1.62	99	PMVIQESK	Oxidation(P)@1; Oxidation(M)@2	cleaved R-P@N-term	0.0012	962.476	2	10	1.1.1.879.3	Winner
0	97.7	NASRPMVIQESK	Oxidation(P)@5; Oxidation(M)@6		-0.0017	1390.69	3	11	1.1.1.900.5	Winner
0	73.2	NASRPMVIQESK	Oxidation(P)@5; Oxidation(M)@6		-0.002	1390.69	3	10	1.1.1.895.4	Winner
0	7	NASRPMVIQESK	Oxidation(P)@5; Oxidation(M)@6		-0.0017	1390.69	3	8	1.1.1.905.5	Winner
0	0.3	EQWLRDMAQQGK	Oxidation(W)@3; Oxidation(M)@7	missed R-D@5	0.0011	1520.71	3	7	1.1.1.927.8	Winner
0	14.9	ESALNLPYHMPENK	Oxidation(Y)@8; Oxidation(M)@10		0.001	1673.77	3	8	1.1.1.1126.8	Winner
0	99	FTSQDASTPASSELNKQEK	Phospho(S)@11	missed K-Q@16	0.0027	2146.94	3	13	1.1.1.1132.11	Winner
0	8.4	FTSQDASTPASSELNKQEK	Phospho(S)@11	missed K-Q@16	0.0027	2146.94	3	7	1.1.1.1127.11	Winner
0	99	KKEPSLESGVHSFEEGSELSK	Phospho(S)@12	missed K-K@1; missed K-E@2	-0.0045	2383.09	4	15	1.1.1.1356.7	Winner
0	97.6	KKEPSLESGVHSFEEGSELSK	Phospho(S)@12	missed K-K@1; missed K-E@2	-0.0028	2383.09	4	12	1.1.1.1381.10	Winner
0	97.3	KKEPSLESGVHSFEEGSELSK	Phospho(S)@12	missed K-K@1; missed K-E@2	-0.0028	2383.09	4	12	1.1.1.1376.7	Winner
0	96.5	KKEPSLESGVHSFEEGSELSK	Phospho(S)@12	missed K-K@1; missed K-E@2	-0.0031	2383.09	4	11	1.1.1.1393.12	Winner
0	80	KKEPSLESGVHSFEEGSELSK	Phospho(S)@12	missed K-K@1; missed K-E@2	-0.0018	2383.09	4	9	1.1.1.1417.15	Winner
0	58.1	KKEPSLESGVHSFEEGSELSK	Phospho(S)@12	missed K-K@1; missed K-E@2	0.0026	2383.1	4	10	1.1.1.1386.7	Winner
0	49.3	KKEPSLESGVHSFEEGSELSK	Phospho(S)@12	missed K-K@1; missed K-E@2	-0.0028	2383.09	4	8	1.1.1.1412.11	Winner
0	47.2	FTSQDASTPASSELNKQEK	Phospho(S)@12	missed K-Q@16	0.0027	2146.94	3	9	1.1.1.1139.12	Winner
0	46.8	KKEPSLESGVHSFEEGSELSK	Phospho(S)@12	missed K-K@1; missed K-E@2	-0.0045	2383.09	4	10	1.1.1.1351.5	Winner
0	38	KKEPSLESGVHSFEEGSELSK	Phospho(S)@12	missed K-K@1; missed K-E@2	-0.0025	2383.09	4	8	1.1.1.1371.13	Winner
0	71.2	PSLESGVHSFEEGSELSK	Phospho(S)@2; Cation:Na(E)@4; Phospho(S)@5	cleaved E-P@N-term	0.0401	2099.85	3	11	1.1.1.1492.11	Winner
0	99	SLSSDSTLLLFK	Phospho(S)@3		0.0003	1389.68	2	10	1.1.1.2236.11	Winner
0	99	SLSSDSTLLLFK	Phospho(S)@3		0.0006	1389.68	2	15	1.1.1.1987.15	Winner
0	99	SLSSDSTLLLFK	Phospho(S)@3		0.0006	1389.68	2	11	1.1.1.2115.18	Winner
0	99	SLSSDSTLLLFK	Phospho(S)@3		0.0006	1389.68	2	9	1.1.1.2103.17	Winner
0	99	SLSSDSTLLLFK	Phospho(S)@3		0.0009	1389.68	2	16	1.1.1.2028.17	Winner
0	99	SLSSDSTLLLFK	Phospho(S)@3		0.0011	1389.68	2	17	1.1.1.2004.16	Winner
0	99	SLSSDSTLLLFK	Phospho(S)@3		0.0011	1389.68	2	17	1.1.1.2010.21	Winner
0	99	SLSSDSTLLLFK	Phospho(S)@3		0.0009	1389.68	2	18	1.1.1.2061.8	Winner
0	99	SLSSDSTLLLFK	Phospho(S)@3		0.0006	1389.68	2	17	1.1.1.2022.13	Winner
0	99	SLSSDSTLLLFK	Phospho(S)@3		-0.0007	1389.68	2	9	1.1.1.2131.18	Winner
0	99	SLSSDSTLLLFK	Phospho(S)@3		-0.0032	1389.68	2	13	1.1.1.2180.12	Winner
0	99	SLSSDSTLLLFK	Phospho(S)@3		-0.0067	1389.67	2	19	1.1.1.2634.3	Winner
0	99	SLSSDSTLLLFK	Phospho(S)@3		-0.0004	1389.68	2	9	1.1.1.2191.8	Winner
0	99	SLSSDSTLLLFK	Phospho(S)@3		-0.0004	1389.68	2	19	1.1.1.2045.13	Winner
0	99	SLSSDSTLLLFK	Phospho(S)@3		-0.0004	1389.68	2	12	1.1.1.2148.18	Winner
0	99	SLSSDSTLLLFK	Phospho(S)@3		0.0011	1389.68	2	14	1.1.1.2051.16	Winner
0	99	SLSSDSTLLLFK	Phospho(S)@3		0.0034	1389.68	2	13	1.1.1.2086.17	Winner
0	99	SLSSDSTLLLFK	Phospho(S)@3		0.0021	1389.68	2	14	1.1.1.2067.16	Winner
0	99	SLSSDSTLLLFK	Phospho(S)@3		0.0011	1389.68	2	11	1.1.1.2165.17	Winner
0	99	SLSSDSTLLLFK	Phospho(S)@3		0.0068	1389.69	2	19	1.1.1.2039.12	Winner
0	99	SPSPGLFR	Phospho(S)@3		0.0018	939.423	2	9	1.1.1.1403.5	Winner
0	99	SPSPGLFR	Phospho(S)@3		0.0018	939.423	2	12	1.1.1.1387.4	Winner
0	99	SPSPGLFR	Phospho(S)@3		0.002	939.423	2	9	1.1.1.1523.3	Winner
0	99	SPSPGLFR	Phospho(S)@3		0.002	939.423	2	9	1.1.1.1468.6	Winner
0	99	SPSPGLFR	Phospho(S)@3		0.0018	939.423	2	10	1.1.1.1508.3	Winner
0	99	SPSPGLFR	Phospho(S)@3		0.0018	939.423	2	10	1.1.1.1392.7	Winner
0	99	SPSPGLFR	Phospho(S)@3		0.002	939.423	2	9	1.1.1.1528.3	Winner
0	99	SPSPGLFR	Phospho(S)@3		0.0002	939.422	2	9	1.1.1.1457.7	Winner
0	99	SPSPGLFR	Phospho(S)@3		0.0002	939.422	2	9	1.1.1.1483.7	Winner
0	99	SPSPGLFR	Phospho(S)@3		0.0004	939.422	2	10	1.1.1.1488.4	Winner
0	99	SPSPGLFR	Phospho(S)@3		-0.0002	939.421	2	10	1.1.1.1428.4	Winner
0	99	SPSPGLFR	Phospho(S)@3		0.0002	939.422	2	9	1.1.1.1463.4	Winner
0	99	SPSPGLFR	Phospho(S)@3		0.0018	939.423	2	9	1.1.1.1439.3	Winner
0	99	SPSPGLFR	Phospho(S)@3		0.0018	939.423	2	10	1.1.1.1503.2	Winner
0	99	SPSPGLFR	Phospho(S)@3		0.0018	939.423	2	8	1.1.1.1478.7	Winner
2	99	SPSPGLFR	Phospho(S)@3		0.0002	939.422	2	11	1.1.1.1397.3	Winner
0	99	SPSPGLFR	Phospho(S)@3		0.0021	939.424	2	7	1.1.1.1538.5	Winner
0	99	SPSPGLFR	Phospho(S)@3		0.0003	939.422	2	11	1.1.1.1382.6	Winner
0	98.9	SPSPGLFR	Phospho(S)@3		0.002	939.423	2	9	1.1.1.1408.3	Winner
0	98.8	SPSPGLFR	Phospho(S)@3		0.0004	939.422	2	10	1.1.1.1372.8	Winner
0	98.5	SPSPGLFR	Phospho(S)@3		0.002	939.423	2	8	1.1.1.1518.2	Winner
0	97.7	SPSPGLFR	Phospho(S)@3		-0.0002	939.421	2	9	1.1.1.1433.2	Winner
0	97.7	SPSPGLFR	Phospho(S)@3		0.0015	939.423	2	9	1.1.1.1413.2	Winner
0	97.6	SPSPGLFR	Phospho(S)@3		0.0015	939.423	2	9	1.1.1.1423.4	Winner
0	97.1	SPSPGLFR	Phospho(S)@3		0.0003	939.422	2	10	1.1.1.1377.8	Winner
0	96.5	SPSPGLFR	Phospho(S)@3		0.002	939.423	2	9	1.1.1.1533.3	Winner
0	95.8	SPSPGLFR	Phospho(S)@3		0.0015	939.423	2	8	1.1.1.1498.4	Winner
0	95.8	SPSPGLFR	Phospho(S)@3		0.0026	939.424	2	7	1.1.1.1549.2	Winner
0	95.2	SPSPGLFR	Phospho(S)@3		0.0004	939.422	2	9	1.1.1.1367.6	Winner
0	93.9	SPSPGLFR	Phospho(S)@3		0.0015	939.423	2	9	1.1.1.1418.4	Winner
0	92.2	SPSPGLFR	Phospho(S)@3		0.0002	939.422	2	9	1.1.1.1451.3	Winner
0	88.3	SPSPGLFR	Phospho(S)@3		-0.0001	939.421	2	9	1.1.1.1445.3	Winner
0	73	SPSPGLFR	Phospho(S)@3		0.0004	939.422	2	7	1.1.1.1362.6	Winner
0	72.2	SPSPGLFR	Phospho(S)@3		0.002	939.423	2	7	1.1.1.1473.6	Winner
0	53	SPSPGLFR	Phospho(S)@3		0.0015	939.423	2	7	1.1.1.1493.4	Winner
0	53	SPSPGLFR	Phospho(S)@3		0.0026	939.424	2	6	1.1.1.1554.2	Winner
0	13.8	SPSPGLFR	Phospho(S)@3		0.002	939.423	2	5	1.1.1.1513.4	Winner
0	9.8	SPSPGLFR	Phospho(S)@3		0.0004	939.422	2	5	1.1.1.1357.8	Winner
0	67.5	SLSSDSTLLLFK	Phospho(S)@4		0.0003	1389.68	2	6	1.1.1.2208.10	Winner
0	0.2	SLSSDSTLLLFK	Phospho(S)@4		0.026	1389.71	2	7	1.1.1.1978.17	Winner
0	99	NFVFHTLSPVK	Phospho(S)@8		-0.0014	1367.66	2	17	1.1.1.1580.9	Winner
0	99	NFVFHTLSPVK	Phospho(S)@8		-0.0014	1367.66	2	10	1.1.1.1633.12	Winner
0	99	NFVFHTLSPVK	Phospho(S)@8		-0.0014	1367.66	2	18	1.1.1.1585.10	Winner
0	99	NFVFHTLSPVK	Phospho(S)@8		-0.0014	1367.66	2	16	1.1.1.1610.12	Winner
0	99	NFVFHTLSPVK	Phospho(S)@8		-0.0008	1367.66	2	8	1.1.1.1657.11	Winner
0	99	NFVFHTLSPVK	Phospho(S)@8		-0.0008	1367.66	2	17	1.1.1.1615.9	Winner
0	99	NFVFHTLSPVK	Phospho(S)@8		-0.0007	1367.66	2	9	1.1.1.1647.11	Winner
0	99	NFVFHTLSPVK	Phospho(S)@8		-0.0008	1367.66	2	15	1.1.1.1625.11	Winner
0	99	NFVFHTLSPVK	Phospho(S)@8		-0.0011	1367.66	2	16	1.1.1.1605.12	Winner
0	99	NFVFHTLSPVK	Phospho(S)@8		-0.0013	1367.66	2	16	1.1.1.1565.10	Winner
0	99	NFVFHTLSPVK	Phospho(S)@8		-0.0007	1367.66	2	12	1.1.1.1662.6	Winner
0	99	NFVFHTLSPVK	Phospho(S)@8		0.0009	1367.66	2	15	1.1.1.1620.8	Winner
0	99	NFVFHTLSPVK	Phospho(S)@8		-0.0007	1367.66	2	11	1.1.1.1641.11	Winner
0	99	NFVFHTLSPVK	Phospho(S)@8		-0.0013	1367.66	2	12	1.1.1.1560.7	Winner
0	99	NFVFHTLSPVK	Phospho(S)@8		-0.0013	1367.66	2	15	1.1.1.1595.13	Winner
0	99	NFVFHTLSPVK	Phospho(S)@8		-0.0014	1367.66	2	10	1.1.1.1630.14	Winner
0	99	NFVFHTLSPVK	Phospho(S)@8		0.0024	1367.67	2	10	1.1.1.1691.15	Winner
0	99	NFVFHTLSPVK	Phospho(S)@8		-0.0014	1367.66	2	17	1.1.1.1575.9	Winner
0	99	NFVFHTLSPVK	Phospho(S)@8		0.0017	1367.67	2	15	1.1.1.1667.8	Winner
0	99	NFVFHTLSPVK	Phospho(S)@8		-0.0014	1367.66	2	18	1.1.1.1570.8	Winner
0	99	NFVFHTLSPVK	Phospho(S)@8		-0.0017	1367.66	2	18	1.1.1.1590.10	Winner
0	99	NFVFHTLSPVK	Phospho(S)@8		-0.0017	1367.66	2	17	1.1.1.1600.14	Winner
0	99	NFVFHTLSPVKAEAAK	Phospho(S)@8	missed K-A@11	0.0001	1837.91	3	17	1.1.1.1551.8	Winner
0	99	NFVFHTLSPVKAEAAK	Phospho(S)@8	missed K-A@11	0.0001	1837.91	3	14	1.1.1.1559.11	Winner
0	99	NFVFHTLSPVKAEAAK	Phospho(S)@8	missed K-A@11	0.0001	1837.91	3	18	1.1.1.1476.7	Winner
0	99	NFVFHTLSPVKAEAAK	Phospho(S)@8	missed K-A@11	0.0003	1837.91	3	16	1.1.1.1564.12	Winner
0	99	NFVFHTLSPVKAEAAK	Phospho(S)@8	missed K-A@11	0.0003	1837.91	3	21	1.1.1.1516.6	Winner
0	99	NFVFHTLSPVKAEAAK	Phospho(S)@8	missed K-A@11	-0.0006	1837.91	3	16	1.1.1.1569.11	Winner
2	99	NFVFHTLSPVKAEAAK	Phospho(S)@8	missed K-A@11	-0.0048	1837.91	2	20	1.1.1.1498.9	Winner
0	99	NFVFHTLSPVKAEAAK	Phospho(S)@8	missed K-A@11	-0.0006	1837.91	3	13	1.1.1.1574.11	Winner
0	99	NFVFHTLSPVKAEAAK	Phospho(S)@8	missed K-A@11	-0.0008	1837.91	3	21	1.1.1.1526.6	Winner
0	99	NFVFHTLSPVKAEAAK	Phospho(S)@8	missed K-A@11	-0.0008	1837.91	3	22	1.1.1.1521.6	Winner
0	99	NFVFHTLSPVKAEAAK	Phospho(S)@8	missed K-A@11	0.0016	1837.91	3	18	1.1.1.1546.11	Winner
0	99	NFVFHTLSPVKAEAAK	Phospho(S)@8	missed K-A@11	0.0006	1837.91	3	15	1.1.1.1531.9	Winner
0	99	NFVFHTLSPVKAEAAK	Phospho(S)@8	missed K-A@11	0.0003	1837.91	3	21	1.1.1.1506.8	Winner
0	99	NFVFHTLSPVKAEAAK	Phospho(S)@8	missed K-A@11	0.0006	1837.91	3	25	1.1.1.1491.13	Winner
0	99	NFVFHTLSPVKAEAAK	Phospho(S)@8	missed K-A@11	0.0006	1837.91	3	17	1.1.1.1536.10	Winner
0	99	NFVFHTLSPVKAEAAK	Phospho(S)@8	missed K-A@11	0.0006	1837.91	3	24	1.1.1.1496.16	Winner
0	99	NFVFHTLSPVKAEAAK	Phospho(S)@8	missed K-A@11	0.0006	1837.91	3	19	1.1.1.1501.10	Winner
0	99	NFVFHTLSPVKAEAAK	Phospho(S)@8	missed K-A@11	0.0006	1837.91	3	24	1.1.1.1481.10	Winner
0	99	NFVFHTLSPVKAEAAK	Phospho(S)@8	missed K-A@11	0.0006	1837.91	3	21	1.1.1.1486.12	Winner
0	99	NFVFHTLSPVKAEAAK	Phospho(S)@8	missed K-A@11	0.0006	1837.91	3	19	1.1.1.1541.12	Winner
0	99	NFVFHTLSPVKAEAAK	Phospho(S)@8	missed K-A@11	0.0006	1837.91	3	20	1.1.1.1511.6	Winner
0	98.9	NFVFHTLSPVK	Phospho(S)@8		0.0043	1367.67	2	10	1.1.1.1673.7	Winner
0	98.4	NFVFHTLSPVKAEAAK	Phospho(S)@8	missed K-A@11	-0.0003	1837.91	3	11	1.1.1.1602.10	Winner
0	98.2	NFVFHTLSPVKAEAAK	Phospho(S)@8	missed K-A@11	-0.0012	1837.91	3	10	1.1.1.1584.11	Winner
0	98	NFVFHTLSPVK	Phospho(S)@8		-0.0014	1367.66	2	9	1.1.1.1635.12	Winner
0	97.3	NFVFHTLSPVKAEAAK	Phospho(S)@8	missed K-A@11	-0.0039	1837.91	3	10	1.1.1.1589.9	Winner
0	96.5	NFVFHTLSPVK	Phospho(S)@8		-0.0008	1367.66	2	8	1.1.1.1697.11	Winner
0	89.6	NFVFHTLSPVKAEAAK	Phospho(S)@8	missed K-A@11	0.0045	1837.92	3	8	1.1.1.1630.11	Winner
0	83.7	NFVFHTLSPVK	Phospho(S)@8		0.0046	1367.67	2	8	1.1.1.1684.15	Winner
0	72.2	NFVFHTLSPVKAEAAK	Phospho(S)@8	missed K-A@11	0.0045	1837.92	3	10	1.1.1.1636.8	Winner
0	69.8	NFVFHTLSPVKAEAAK	Phospho(S)@8	missed K-A@11	0.0001	1837.91	3	9	1.1.1.1595.10	Winner
0	32	NFVFHTLSPVK	Phospho(S)@8		0.0027	1367.67	3	6	1.1.1.1564.4	Winner
0	22.7	NFVFHTLSPVK	Phospho(S)@8		0.002	1367.67	2	6	1.1.1.1652.15	Winner
0	16.8	NFVFHTLSPVK	Phospho(S)@8		0.002	1367.67	2	6	1.1.1.1679.18	Winner
0	12.4	NFVFHTLSPVK	Phospho(S)@8		0.0021	1367.67	3	7	1.1.1.1577.4	Winner
0	97.3	ETQIITGSDESCRK	Phospho(T)@2	missed R-K@13	-0.0115	1645.69	2	7	1.1.1.1009.17	Winner
1.28	95.3	RFTLDR	Phospho(T)@3	missed R-F@1	0.0011	886.408	2	9	1.1.1.1099.5	Winner
0	85.9	RFTLDR	Phospho(T)@3	missed R-F@1	0.0011	886.408	2	7	1.1.1.1105.8	Winner
0	84.3	RFTLDR	Phospho(T)@3	missed R-F@1	0.0009	886.407	2	7	1.1.1.1110.6	Winner
0	43.3	RFTLDR	Phospho(T)@3	missed R-F@1	0.0015	886.408	2	6	1.1.1.1093.5	Winner
0	38.7	RFTLDR	Phospho(T)@3	missed R-F@1	0.0025	886.409	2	7	1.1.1.1125.4	Winner
0	31.1	RFTLDR	Phospho(T)@3	missed R-F@1	0.0009	886.407	2	6	1.1.1.1115.7	Winner
0	24.4	RFTLDR	Phospho(T)@3	missed R-F@1	0.0011	886.408	2	6	1.1.1.1135.5	Winner
0	46.8	SETDENSGKQPSKLDEDDSCSLLTK	Phospho(T)@3; Phospho(S)@7; Ser->Oxoalanine(S)@12; Cys->Dha(C)@20	missed K-Q@9; missed K-L@13	0.022	2849.18	4	11	1.1.1.1205.11	Winner
0	99	NFVFHTLSPVK	Phospho(T)@6		-0.0046	1367.66	2	12	1.1.1.1722.10	Winner
0	97.2	ETQIITGSDESCRK	Phospho(T)@6	missed R-K@13	-0.0115	1645.69	2	9	1.1.1.1014.13	Winner
0	73.8	GSEQTTGAENEVETNALPVVSK	Phospho(T)@6; Ammonia-loss(N)@10		-0.0044	2322.02	3	10	1.1.1.1400.17	Winner
0	99	QPSKLDEDDSCSLLTK	Propionamide(C)@11	missed K-L@4	0.001	1848.88	3	14	1.1.1.1242.14	Winner
0	96.8	QPSKLDEDDSCSLLTK	Propionamide(C)@11	missed K-L@4	0.001	1848.88	3	12	1.1.1.1237.14	Winner
0	78.1	QPSKLDEDDSCSLLTK	Propionamide(C)@11	missed K-L@4	0.001	1848.88	3	11	1.1.1.1232.15	Winner
0	99	ETQIITGSDESCR	Propionamide(C)@12		0.0012	1508.68	2	13	1.1.1.1053.14	Winner
0	99	ETQIITGSDESCR	Propionamide(C)@12		0.0013	1508.68	2	22	1.1.1.1058.15	Winner
0	99	ETQIITGSDESCR	Propionamide(C)@12		0.0013	1508.68	2	21	1.1.1.1063.12	Winner
0	99	ETQIITGSDESCR	Propionamide(C)@12		0.0016	1508.68	2	15	1.1.1.1073.11	Winner
0	99	ETQIITGSDESCR	Propionamide(C)@12		0.0013	1508.68	2	20	1.1.1.1068.11	Winner
0	99	ETQIITGSDESCRK	Propionamide(C)@12	missed R-K@13	-0.0032	1636.77	3	14	1.1.1.971.7	Winner
0	99	ETQIITGSDESCRK	Propionamide(C)@12	missed R-K@13	-0.0028	1636.77	3	16	1.1.1.951.4	Winner
0	99	ETQIITGSDESCRK	Propionamide(C)@12	missed R-K@13	-0.0028	1636.77	3	15	1.1.1.966.6	Winner
0	99	ETQIITGSDESCRK	Propionamide(C)@12	missed R-K@13	-0.0028	1636.77	3	14	1.1.1.961.6	Winner
0	99	ETQIITGSDESCRK	Propionamide(C)@12	missed R-K@13	-0.0028	1636.77	3	15	1.1.1.956.7	Winner
0	44.2	ETQIITGSDESCRK	Propionamide(C)@12	missed R-K@13	0.0009	1636.77	3	10	1.1.1.981.8	Winner
0	19.6	ETQIITGSDESCRK	Propionamide(C)@12	missed R-K@13	0.0003	1636.77	3	9	1.1.1.976.6	Winner
0	10.9	ETQIITGSDESCRK	Propionamide(C)@12; Deamidated(R)@13	missed R-K@13	0.0047	1637.76	3	6	1.1.1.1015.15	Winner
2	99	NQEDDVEQPFNDSGCLLVDK	Propionamide(C)@15		-0.0016	2335.03	3	15	1.1.1.1588.13	Winner
0	99	SETDENSGKQPSKLDEDDSCSLLTK	Propionamide(C)@20	missed K-Q@9; missed K-L@13	-0.0018	2796.26	4	18	1.1.1.1203.13	Winner
0	99	SETDENSGKQPSKLDEDDSCSLLTK	Propionamide(C)@20	missed K-Q@9; missed K-L@13	-0.0018	2796.26	4	21	1.1.1.1209.13	Winner
0	99	LDEDDSCSLLTK	Propionamide(C)@7		0.0003	1408.64	2	16	1.1.1.1278.17	Winner
0	99	LDEDDSCSLLTK	Propionamide(C)@7		0.0003	1408.64	2	16	1.1.1.1293.11	Winner
0	99	LDEDDSCSLLTK	Propionamide(C)@7		0.0003	1408.64	2	16	1.1.1.1288.16	Winner
0	99	LDEDDSCSLLTK	Propionamide(C)@7		0.0003	1408.64	2	18	1.1.1.1283.17	Winner
0	99	ENMEELLNLCSGK	Trioxidation(C)@10		0.0003	1526.66	2	17	1.1.1.1720.12	Winner
0	98.7	ENMEELLNLCSGK	Trioxidation(C)@10		0.0003	1526.66	2	13	1.1.1.1715.16	Winner
0	97.8	ENMEELLNLCSGK	Trioxidation(C)@10; Delta:H(4)C(2)(K)@13		-0.0142	1554.68	2	15	1.1.1.1838.9	Winner
0	97.8	ENMEELLNLCSGK	Trioxidation(C)@10; Delta:H(4)C(2)(K)@13		-0.0139	1554.68	2	16	1.1.1.1832.15	Winner
0	48.9	ENMEELLNLCSGK	Trioxidation(C)@10; Formyl(K)@13		0.0225	1554.68	2	9	1.1.1.1825.18	Winner
2	99	QPSKLDEDDSCSLLTK	Trioxidation(C)@11	missed K-L@4	0.0035	1825.83	2	18	1.1.1.1238.13	Winner
0	99	QPSKLDEDDSCSLLTK	Trioxidation(C)@11	missed K-L@4	0.0035	1825.83	2	14	1.1.1.1233.15	Winner
0	99	ETQIITGSDESCR	Trioxidation(C)@12		0.0009	1485.63	2	14	1.1.1.1073.10	Winner
0	99	ETQIITGSDESCRK	Trioxidation(C)@12	missed R-K@13	0.0009	1613.72	2	18	1.1.1.985.9	Winner
0	99	ETQIITGSDESCRK	Trioxidation(C)@12	missed R-K@13	0.0009	1613.72	2	15	1.1.1.990.8	Winner
0	99	ETQIITGSDESCRK	Trioxidation(C)@12	missed R-K@13	0.0009	1613.72	2	21	1.1.1.980.7	Winner
0	99	ETQIITGSDESCRK	Trioxidation(C)@12	missed R-K@13	0.0009	1613.72	2	19	1.1.1.975.9	Winner
0	96.9	ETQIITGSDESCR	Trioxidation(C)@12		0.0009	1485.63	2	10	1.1.1.1079.12	Winner
0	99	ETQIITGSDESCR	Trioxidation(C)@12; Dimethyl(R)@13		-0.0171	1513.64	2	19	1.1.1.1148.12	Winner
0	99	ETQIITGSDESCR	Trioxidation(C)@12; Dimethyl(R)@13		-0.0171	1513.64	2	16	1.1.1.1153.13	Winner
0	99	ETQIITGSDESCR	Trioxidation(C)@12; Dimethyl(R)@13		-0.0171	1513.64	2	14	1.1.1.1138.13	Winner
0	97.7	ETQIITGSDESCRK	Trioxidation(C)@12; Formyl(K)@14	missed R-K@13	0.0167	1641.73	3	13	1.1.1.1033.13	Winner
0	99	SETDENSGKQPSKLDEDDSCSLLTK	Trioxidation(C)@20	missed K-Q@9; missed K-L@13	-0.0015	2773.21	3	26	1.1.1.1199.9	Winner
0	99	SETDENSGKQPSKLDEDDSCSLLTK	Trioxidation(C)@20	missed K-Q@9; missed K-L@13	-0.0015	2773.21	3	19	1.1.1.1193.15	Winner
0	99	SETDENSGKQPSKLDEDDSCSLLTK	Trioxidation(C)@20	missed K-Q@9; missed K-L@13	-0.0015	2773.21	3	14	1.1.1.1205.12	Winner
0	98.7	SETDENSGKQPSKLDEDDSCSLLTK	Trioxidation(C)@20; Delta:H(4)C(2)(K)@25	missed K-Q@9; missed K-L@13	-0.016	2801.22	4	14	1.1.1.1283.16	Winner
0	99	SETDENSGKQPSKLDEDDSCSLLTK	Trioxidation(C)@20; Formyl(K)@25	missed K-Q@9; missed K-L@13	0.0204	2801.22	4	14	1.1.1.1288.15	Winner
0	99	PTCHGNAMALLK	Trioxidation(C)@3; Dioxidation(M)@8	cleaved R-P@N-term	-0.0007	1334.6	2	11	1.1.1.1117.14	Winner
0	99	PTCHGNAMALLK	Trioxidation(C)@3; Dioxidation(M)@8	cleaved R-P@N-term	-0.0007	1334.6	2	10	1.1.1.1122.17	Winner
0	99	PTCHGNAMALLK	Trioxidation(C)@3; Oxidation(M)@8	cleaved R-P@N-term	-0.0006	1318.6	2	13	1.1.1.1091.8	Winner
2	99	PTCHGNAMALLK	Trioxidation(C)@3; Oxidation(M)@8	cleaved R-P@N-term	-0.0008	1318.6	2	19	1.1.1.1086.4	Winner
0	99	PTCHGNAMALLK	Trioxidation(C)@3; Oxidation(M)@8	cleaved R-P@N-term	-0.0008	1318.6	2	20	1.1.1.1076.3	Winner
0	99	PTCHGNAMALLK	Trioxidation(C)@3; Oxidation(M)@8	cleaved R-P@N-term	-0.0008	1318.6	2	17	1.1.1.1071.6	Winner
0	99	PTCHGNAMALLK	Trioxidation(C)@3; Oxidation(M)@8	cleaved R-P@N-term	-0.0008	1318.6	2	19	1.1.1.1081.9	Winner
2	99	LDEDDSCSLLTK	Trioxidation(C)@7		0.0059	1385.59	2	13	1.1.1.1278.16	Winner
0	99	LDEDDSCSLLTK	Trioxidation(C)@7		0.007	1385.59	2	12	1.1.1.1272.20	Winner
0	90.3	LDEDDSCSLLTK	Trioxidation(C)@7; Formyl(K)@12		0.0143	1413.6	2	10	1.1.1.1397.15	Winner
2	99	AALSDHNPSAPR		cleaved L-A@N-term	0.0017	1234.61	2	14	1.1.1.1036.10	Winner
0	99	AALSDHNPSAPR		cleaved L-A@N-term	0.0017	1234.61	2	10	1.1.1.1030.11	Winner
0	99	AALSDHNPSAPR		cleaved L-A@N-term	0.0017	1234.61	2	12	1.1.1.1042.12	Winner
0	99	ADGDLHSDGPGR		cleaved L-A@N-term	-0.0017	1195.52	2	8	1.1.1.1084.15	Winner
0	99	ADGDLHSDGPGR		cleaved L-A@N-term	-0.0017	1195.52	2	14	1.1.1.1089.20	Winner
2	99	ADGDLHSDGPGR		cleaved L-A@N-term	-0.0017	1195.52	2	19	1.1.1.1094.15	Winner
0	99	ADGDLHSDGPGR		cleaved L-A@N-term	-0.0018	1195.52	2	10	1.1.1.1100.13	Winner
0	99	ADVVPVTLAPK			-0.0001	1108.65	2	15	1.1.1.1374.5	Winner
2	99	ADVVPVTLAPK			-0.0001	1108.65	2	16	1.1.1.1364.9	Winner
0	99	ADVVPVTLAPK			-0.0015	1108.65	2	11	1.1.1.1379.8	Winner
0	99	ADVVPVTLAPK			-0.0001	1108.65	2	13	1.1.1.1354.10	Winner
0	99	ADVVPVTLAPK			-0.0001	1108.65	2	15	1.1.1.1359.9	Winner
0	99	ADVVPVTLAPK			-0.0001	1108.65	2	7	1.1.1.1349.7	Winner
0	99	ADVVPVTLAPK			-0.0001	1108.65	2	16	1.1.1.1369.5	Winner
0	99	AGQTVNVNVIVK			-0.001	1240.71	2	13	1.1.1.1343.12	Winner
2	99	AGQTVNVNVIVK			-0.0009	1240.71	2	15	1.1.1.1330.11	Winner
0	99	AGQTVNVNVIVK			-0.002	1240.71	2	12	1.1.1.1379.10	Winner
0	99	AGQTVNVNVIVK			-0.0014	1240.71	2	12	1.1.1.1348.11	Winner
0	99	AGQTVNVNVIVK			-0.002	1240.71	2	13	1.1.1.1384.10	Winner
0	99	AGQTVNVNVIVK			-0.0016	1240.71	2	12	1.1.1.1354.14	Winner
0	99	AGQTVNVNVIVK			-0.0016	1240.71	2	13	1.1.1.1315.7	Winner
0	99	AGQTVNVNVIVK			-0.0016	1240.71	2	14	1.1.1.1320.10	Winner
0	99	AGQTVNVNVIVK			-0.0004	1240.71	2	14	1.1.1.1338.14	Winner
0	99	ALEGEGPQNPEETDEKVEEPEQQNK		cleaved H-A@N-term; missed K-V@16	0.0045	2823.27	3	25	1.1.1.1147.14	Winner
2	99	ALEGEGPQNPEETDEKVEEPEQQNK		cleaved H-A@N-term; missed K-V@16	0.0045	2823.27	3	27	1.1.1.1152.14	Winner
0	99	ALEGEGPQNPEETDEKVEEPEQQNK		cleaved H-A@N-term; missed K-V@16	0.0045	2823.27	3	21	1.1.1.1142.11	Winner
0	99	ALEGEGPQNPEETDEKVEEPEQQNK		cleaved H-A@N-term; missed K-V@16	0.0045	2823.27	3	18	1.1.1.1157.13	Winner
2	99	ALSDHNPSAPR		cleaved A-A@N-term	-0.0006	1163.57	2	13	1.1.1.1035.15	Winner
0	99	ALSDHNPSAPR		cleaved A-A@N-term	-0.0006	1163.57	2	13	1.1.1.1029.15	Winner
0	99	ALSDHNPSAPR		cleaved A-A@N-term	-0.0006	1163.57	2	11	1.1.1.1042.11	Winner
0	99	ASLVSSASK			0.0005	848.461	2	11	1.1.1.856.2	Winner
0	99	ASLVSSASK			0.0003	848.461	2	12	1.1.1.851.2	Winner
2	99	ASLVSSASK			0.0003	848.461	2	12	1.1.1.861.2	Winner
0	99	ASLVSSASK			0.0003	848.461	2	13	1.1.1.846.2	Winner
0	99	ASLVSSASK			0.0005	848.461	2	9	1.1.1.866.2	Winner
0	99	AVGFLSVPK			0.0007	916.539	2	10	1.1.1.1478.6	Winner
0	99	AVGFLSVPK			0.001	916.539	2	15	1.1.1.1440.3	Winner
0	99	AVGFLSVPK			0.0009	916.539	2	15	1.1.1.1458.3	Winner
0	99	AVGFLSVPK			0.001	916.539	2	13	1.1.1.1463.3	Winner
0	99	AVGFLSVPK			0.001	916.539	2	15	1.1.1.1452.3	Winner
0	99	AVGFLSVPK			0.0007	916.539	2	11	1.1.1.1473.5	Winner
0	99	AVGFLSVPK			0.001	916.539	2	15	1.1.1.1446.2	Winner
2	99	AVGFLSVPK			0.0009	916.539	2	14	1.1.1.1434.3	Winner
0	99	AVGFLSVPK			0.0007	916.539	2	12	1.1.1.1468.5	Winner
1.17	99	DGDLHSDGPGR		cleaved A-D@N-term	0	1124.48	2	7	1.1.1.1093.14	Winner
0	99	DLVKNEELEIQEK		missed K-N@4	-0.0042	1585.82	3	13	1.1.1.1364.8	Winner
2	99	DLVKNEELEIQEK		missed K-N@4	-0.0034	1585.82	3	16	1.1.1.1359.6	Winner
0	99	DLVKNEELEIQEK		missed K-N@4	-0.0034	1585.82	3	15	1.1.1.1349.6	Winner
0	99	DLVKNEELEIQEK		missed K-N@4	-0.0001	1585.82	3	18	1.1.1.1339.8	Winner
0	99	DLVKNEELEIQEK		missed K-N@4	-0.0003	1585.82	2	13	1.1.1.1348.13	Winner
0	99	DLVKNEELEIQEK		missed K-N@4	-0.0025	1585.82	3	20	1.1.1.1328.8	Winner
0	99	DLVKNEELEIQEK		missed K-N@4	-0.0003	1585.82	2	14	1.1.1.1347.13	Winner
0	99	DLVKNEELEIQEK		missed K-N@4	-0.0003	1585.82	2	12	1.1.1.1346.12	Winner
0	99	DLVKNEELEIQEK		missed K-N@4	-0.0025	1585.82	3	19	1.1.1.1334.8	Winner
0	99	DLVKNEELEIQEK		missed K-N@4	-0.0032	1585.82	3	11	1.1.1.1354.8	Winner
0	99	DLVKNEELEIQEK		missed K-N@4	-0.0025	1585.82	3	18	1.1.1.1318.8	Winner
0	99	DLVKNEELEIQEK		missed K-N@4	-0.0025	1585.82	3	20	1.1.1.1323.6	Winner
0	99	DLVKNEELEIQEK		missed K-N@4	0	1585.82	2	16	1.1.1.1313.14	Winner
0	99	DLVKNEELEIQEK		missed K-N@4	-0.0001	1585.82	3	15	1.1.1.1344.5	Winner
0	99	DLVKNEELEIQEK		missed K-N@4	-0.0032	1585.82	3	10	1.1.1.1392.10	Winner
0	99	DMGTDGKEELK		missed K-E@7	-0.0006	1221.55	2	11	1.1.1.911.10	Winner
0	99	DMGTDGKEELK		missed K-E@7	-0.0009	1221.55	2	11	1.1.1.906.7	Winner
2	99	DMGTDGKEELK		missed K-E@7	-0.0006	1221.55	2	14	1.1.1.916.10	Winner
0	99	DMGTDGKEELKADVVPVTLAPK		missed K-E@7; missed K-A@11	-0.0039	2312.19	3	17	1.1.1.1511.10	Winner
0	99	DMGTDGKEELKADVVPVTLAPK		missed K-E@7; missed K-A@11	-0.0043	2312.19	3	32	1.1.1.1493.9	Winner
0	99	DMGTDGKEELKADVVPVTLAPK		missed K-E@7; missed K-A@11	-0.0039	2312.19	3	15	1.1.1.1513.12	Winner
0	99	DMGTDGKEELKADVVPVTLAPK		missed K-E@7; missed K-A@11	-0.0039	2312.19	3	18	1.1.1.1509.8	Winner
0	99	DMGTDGKEELKADVVPVTLAPK		missed K-E@7; missed K-A@11	-0.0039	2312.19	3	26	1.1.1.1498.8	Winner
0	99	DMGTDGKEELKADVVPVTLAPK		missed K-E@7; missed K-A@11	-0.0039	2312.19	3	26	1.1.1.1497.8	Winner
0	99	DMGTDGKEELKADVVPVTLAPK		missed K-E@7; missed K-A@11	-0.0039	2312.19	3	13	1.1.1.1512.12	Winner
0	99	DMGTDGKEELKADVVPVTLAPK		missed K-E@7; missed K-A@11	-0.0043	2312.19	3	28	1.1.1.1491.15	Winner
0	99	DMGTDGKEELKADVVPVTLAPK		missed K-E@7; missed K-A@11	-0.0043	2312.19	3	25	1.1.1.1499.9	Winner
0	99	DMGTDGKEELKADVVPVTLAPK		missed K-E@7; missed K-A@11	-0.0043	2312.19	3	25	1.1.1.1494.11	Winner
0	99	DMGTDGKEELKADVVPVTLAPK		missed K-E@7; missed K-A@11	-0.0043	2312.19	3	21	1.1.1.1480.15	Winner
0	99	DMGTDGKEELKADVVPVTLAPK		missed K-E@7; missed K-A@11	-0.0043	2312.19	3	18	1.1.1.1504.9	Winner
0	99	DMGTDGKEELKADVVPVTLAPK		missed K-E@7; missed K-A@11	-0.0043	2312.19	3	21	1.1.1.1501.13	Winner
0	99	DMGTDGKEELKADVVPVTLAPK		missed K-E@7; missed K-A@11	-0.0043	2312.19	3	24	1.1.1.1496.19	Winner
0	99	DMGTDGKEELKADVVPVTLAPK		missed K-E@7; missed K-A@11	-0.0038	2312.19	4	19	1.1.1.1510.8	Winner
0	99	DMGTDGKEELKADVVPVTLAPK		missed K-E@7; missed K-A@11	-0.003	2312.19	4	21	1.1.1.1500.9	Winner
0	99	DMGTDGKEELKADVVPVTLAPK		missed K-E@7; missed K-A@11	-0.003	2312.19	4	13	1.1.1.1520.9	Winner
0	99	DMGTDGKEELKADVVPVTLAPK		missed K-E@7; missed K-A@11	-0.0033	2312.19	3	16	1.1.1.1517.12	Winner
0	99	DMGTDGKEELKADVVPVTLAPK		missed K-E@7; missed K-A@11	-0.0033	2312.19	3	16	1.1.1.1518.10	Winner
0	99	DMGTDGKEELKADVVPVTLAPK		missed K-E@7; missed K-A@11	-0.0035	2312.19	3	18	1.1.1.1506.13	Winner
2	99	DMGTDGKEELKADVVPVTLAPK		missed K-E@7; missed K-A@11	-0.0044	2312.19	3	23	1.1.1.1503.6	Winner
0	99	DMGTDGKEELKADVVPVTLAPK		missed K-E@7; missed K-A@11	-0.0048	2312.19	3	12	1.1.1.1521.11	Winner
0	99	DMGTDGKEELKADVVPVTLAPK		missed K-E@7; missed K-A@11	-0.0043	2312.19	3	31	1.1.1.1486.14	Winner
0	99	DMGTDGKEELKADVVPVTLAPK		missed K-E@7; missed K-A@11	-0.0043	2312.19	3	20	1.1.1.1507.13	Winner
0	99	DMGTDGKEELKADVVPVTLAPK		missed K-E@7; missed K-A@11	-0.0044	2312.19	3	17	1.1.1.1502.12	Winner
0	99	DMGTDGKEELKADVVPVTLAPK		missed K-E@7; missed K-A@11	-0.003	2312.19	4	13	1.1.1.1478.9	Winner
0	99	DMGTDGKEELKADVVPVTLAPK		missed K-E@7; missed K-A@11	0.0031	2312.2	4	17	1.1.1.1535.5	Winner
0	99	DMGTDGKEELKADVVPVTLAPK		missed K-E@7; missed K-A@11	0.0014	2312.2	4	14	1.1.1.1530.10	Winner
0	99	DMGTDGKEELKADVVPVTLAPK		missed K-E@7; missed K-A@11	0.0038	2312.2	4	13	1.1.1.1546.8	Winner
0	99	DMGTDGKEELKADVVPVTLAPK		missed K-E@7; missed K-A@11	-0.0026	2312.19	4	23	1.1.1.1495.9	Winner
0	99	DMGTDGKEELKADVVPVTLAPK		missed K-E@7; missed K-A@11	-0.003	2312.19	4	21	1.1.1.1505.9	Winner
0	99	DMGTDGKEELKADVVPVTLAPK		missed K-E@7; missed K-A@11	-0.0026	2312.19	4	24	1.1.1.1490.13	Winner
0	99	DMGTDGKEELKADVVPVTLAPK		missed K-E@7; missed K-A@11	-0.0026	2312.19	4	20	1.1.1.1485.13	Winner
0	99	DMGTDGKEELKADVVPVTLAPK		missed K-E@7; missed K-A@11	0.0011	2312.19	4	16	1.1.1.1515.6	Winner
0	99	DMGTDGKEELKADVVPVTLAPK		missed K-E@7; missed K-A@11	0.0014	2312.2	4	13	1.1.1.1573.5	Winner
0	99	DMGTDGKEELKADVVPVTLAPK		missed K-E@7; missed K-A@11	0.0006	2312.19	4	16	1.1.1.1525.6	Winner
2	99	EELKADVVPVTLAPK		missed K-A@4	0	1607.91	3	13	1.1.1.1438.6	Winner
0	99	EELKADVVPVTLAPK		missed K-A@4	0	1607.91	3	12	1.1.1.1450.3	Winner
0	99	EELKADVVPVTLAPK		missed K-A@4	0	1607.91	3	11	1.1.1.1444.5	Winner
0	99	EIIDTANTTEMNSDHHSK			0.0003	2041.9	4	19	1.1.1.1050.14	Winner
0	99	EIIDTANTTEMNSDHHSK			-0.0021	2041.9	3	16	1.1.1.1056.10	Winner
2	99	EIIDTANTTEMNSDHHSK			-0.0017	2041.9	3	18	1.1.1.1049.13	Winner
0	99	EIIDTANTTEMNSDHHSK			-0.0017	2041.9	3	17	1.1.1.1052.17	Winner
0	99	EIIDTANTTEMNSDHHSK			0.0003	2041.9	4	15	1.1.1.1055.10	Winner
0	99	EIIDTANTTEMNSDHHSK			0.0003	2041.9	4	16	1.1.1.1044.11	Winner
0	99	EIIDTANTTEMNSDHHSK			-0.0017	2041.9	3	18	1.1.1.1048.9	Winner
0	99	EIIDTANTTEMNSDHHSK			-0.0017	2041.9	3	19	1.1.1.1053.12	Winner
0	99	EIIDTANTTEMNSDHHSK			-0.0017	2041.9	3	16	1.1.1.1038.6	Winner
0	99	EPSLESGVHSFEEGSELSK			-0.0021	2046.94	3	20	1.1.1.1487.10	Winner
0	99	EPSLESGVHSFEEGSELSK			-0.0021	2046.94	3	14	1.1.1.1507.11	Winner
2	99	EPSLESGVHSFEEGSELSK			-0.0021	2046.94	3	15	1.1.1.1482.9	Winner
0	99	EPSLESGVHSFEEGSELSK			-0.0021	2046.94	3	19	1.1.1.1497.6	Winner
0	99	EPSLESGVHSFEEGSELSK			-0.0021	2046.94	3	17	1.1.1.1492.10	Winner
0	99	EPSLESGVHSFEEGSELSK			-0.0021	2046.94	3	17	1.1.1.1502.9	Winner
0	99	ESALNLPYHMPENK			-0.0003	1641.78	3	15	1.1.1.1418.8	Winner
0	99	ESALNLPYHMPENK			-0.0005	1641.78	3	12	1.1.1.1439.8	Winner
0	99	ESALNLPYHMPENK			-0.0003	1641.78	3	14	1.1.1.1423.8	Winner
0	99	ESALNLPYHMPENK			-0.0003	1641.78	3	15	1.1.1.1428.8	Winner
0	99	ESALNLPYHMPENK			-0.0003	1641.78	3	15	1.1.1.1433.4	Winner
2	99	ETQIITGSDES		cleaved S-C@C-term	0.0042	1178.53	2	12	1.1.1.1078.11	Winner
0	99	FTSQDASTPASSELNK			0.0006	1681.78	2	28	1.1.1.1115.14	Winner
0	99	FTSQDASTPASSELNK			0.0006	1681.78	2	28	1.1.1.1125.10	Winner
0	99	FTSQDASTPASSELNK			0.0006	1681.78	2	27	1.1.1.1120.18	Winner
2	99	FTSQDASTPASSELNK			-0.0002	1681.78	2	18	1.1.1.1104.9	Winner
0	99	FTSQDASTPASSELNK			0.0001	1681.78	2	16	1.1.1.1110.14	Winner
0	99	FTSQDASTPASSELNK			0.0004	1681.78	2	23	1.1.1.1135.10	Winner
0	99	FTSQDASTPASSELNKQEK		missed K-Q@16	-0.002	2066.97	3	20	1.1.1.1078.12	Winner
0	99	FTSQDASTPASSELNKQEK		missed K-Q@16	-0.0021	2066.97	3	16	1.1.1.1105.15	Winner
0	99	FTSQDASTPASSELNKQEK		missed K-Q@16	-0.002	2066.97	3	19	1.1.1.1099.12	Winner
2	99	FTSQDASTPASSELNKQEK		missed K-Q@16	-0.0021	2066.97	3	22	1.1.1.1083.13	Winner
0	99	FTSQDASTPASSELNKQEK		missed K-Q@16	-0.0021	2066.97	3	23	1.1.1.1088.16	Winner
0	99	FTSQDASTPASSELNKQEK		missed K-Q@16	-0.0021	2066.97	3	24	1.1.1.1093.18	Winner
0	99	GPSFMTSPSPK			-0.0001	1134.54	2	19	1.1.1.1181.7	Winner
2	99	GPSFMTSPSPK			-0.0002	1134.54	2	17	1.1.1.1175.6	Winner
0	99	GPSFMTSPSPK			-0.0004	1134.54	2	11	1.1.1.1202.3	Winner
0	99	GPSFMTSPSPK			-0.0001	1134.54	2	18	1.1.1.1187.12	Winner
0	99	GPSFMTSPSPK			-0.0001	1134.54	2	17	1.1.1.1194.4	Winner
0	99	GSEQTTGAENEVETNALPVVSK			-0.0033	2259.08	2	27	1.1.1.1400.20	Winner
0	99	GSEQTTGAENEVETNALPVVSK			-0.0014	2259.09	3	32	1.1.1.1399.12	Winner
0	99	GSEQTTGAENEVETNALPVVSK			-0.0014	2259.09	3	32	1.1.1.1410.10	Winner
0	99	GSEQTTGAENEVETNALPVVSK			-0.0033	2259.08	2	26	1.1.1.1407.20	Winner
0	99	GSEQTTGAENEVETNALPVVSK			-0.0011	2259.09	3	23	1.1.1.1389.13	Winner
0	99	GSEQTTGAENEVETNALPVVSK			-0.0033	2259.08	2	18	1.1.1.1411.16	Winner
0	99	GSEQTTGAENEVETNALPVVSK			-0.0014	2259.09	3	33	1.1.1.1394.12	Winner
0	99	GSEQTTGAENEVETNALPVVSK			-0.0014	2259.09	3	32	1.1.1.1405.13	Winner
0	99	GSEQTTGAENEVETNALPVVSK			-0.0031	2259.08	2	16	1.1.1.1412.19	Winner
0	99	GSEQTTGAENEVETNALPVVSK			-0.0026	2259.08	2	18	1.1.1.1413.16	Winner
0	99	GSEQTTGAENEVETNALPVVSK			-0.0033	2259.08	2	23	1.1.1.1396.21	Winner
0	99	GSEQTTGAENEVETNALPVVSK			-0.0014	2259.09	3	25	1.1.1.1415.10	Winner
0	99	GSEQTTGAENEVETNALPVVSK			-0.0033	2259.08	2	25	1.1.1.1408.17	Winner
0	99	GSEQTTGAENEVETNALPVVSK			-0.0033	2259.08	2	26	1.1.1.1397.21	Winner
0	99	GSEQTTGAENEVETNALPVVSK			-0.0033	2259.08	2	26	1.1.1.1401.13	Winner
0	99	GSEQTTGAENEVETNALPVVSK			-0.0033	2259.08	2	23	1.1.1.1395.17	Winner
0	99	GTSFFPTAGGFR			-0.0012	1243.6	2	12	1.1.1.1566.11	Winner
0	99	GTSFFPTAGGFR			-0.0014	1243.6	2	18	1.1.1.1591.4	Winner
0	99	GTSFFPTAGGFR			-0.0014	1243.6	2	18	1.1.1.1581.10	Winner
0	99	GTSFFPTAGGFR			-0.0014	1243.6	2	18	1.1.1.1571.14	Winner
2	99	GTSFFPTAGGFR			-0.0014	1243.6	2	17	1.1.1.1586.6	Winner
0	99	GTSFFPTAGGFR			0.0004	1243.6	2	12	1.1.1.1596.14	Winner
0	99	GTSFFPTAGGFR			0.0004	1243.6	2	10	1.1.1.1606.15	Winner
0	99	GTSFFPTAGGFR			-0.0014	1243.6	2	19	1.1.1.1576.13	Winner
2	99	HIHDKEGTAGK		missed K-E@5	-0.002	1191.6	2	13	1.1.1.583.2	Winner
0.55	99	IHDFFK		cleaved T-I@N-term	0.0018	805.414	2	8	1.1.1.1252.2	Winner
2	99	ITAEEEEEIGEDSQFMILAK			0.0005	2281.07	3	24	1.1.1.1858.15	Winner
0	99	ITAEEEEEIGEDSQFMILAK			-0.0052	2281.06	3	29	1.1.1.2228.3	Winner
0	99	ITAEEEEEIGEDSQFMILAK			-0.0052	2281.06	3	26	1.1.1.2234.3	Winner
0	99	ITAEEEEEIGEDSQFMILAK			-0.0019	2281.07	3	19	1.1.1.1876.11	Winner
0	99	ITAEEEEEIGEDSQFMILAK			-0.0038	2281.06	3	23	1.1.1.1886.16	Winner
0	99	ITAEEEEEIGEDSQFMILAK			0.0024	2281.07	2	13	1.1.1.1831.21	Winner
0	99	ITAEEEEEIGEDSQFMILAK			0.0014	2281.07	3	29	1.1.1.1837.13	Winner
0	99	ITAEEEEEIGEDSQFMILAK			0.0005	2281.07	3	23	1.1.1.1853.19	Winner
0	99	ITAEEEEEIGEDSQFMILAK			0.0014	2281.07	3	26	1.1.1.1848.16	Winner
0	99	ITAEEEEEIGEDSQFMILAK			0.0014	2281.07	3	27	1.1.1.1828.8	Winner
0	99	ITAEEEEEIGEDSQFMILAK			0.0014	2281.07	3	26	1.1.1.1843.15	Winner
0	99	ITAEEEEEIGEDSQFMILAK			0.007	2281.07	3	21	1.1.1.1893.8	Winner
0	99	ITAEEEEEIGEDSQFMILAK			0.0067	2281.07	3	12	1.1.1.1942.20	Winner
0	99	ITAEEEEEIGEDSQFMILAK			0.0074	2281.07	3	19	1.1.1.1925.17	Winner
0	99	ITAEEEEEIGEDSQFMILAK			0.008	2281.08	3	18	1.1.1.1914.11	Winner
0	99	ITAEEEEEIGEDSQFMILAK			0.0074	2281.07	3	16	1.1.1.1920.21	Winner
0	99	ITAEEEEEIGEDSQFMILAK			-0.001	2281.07	3	16	1.1.1.1899.18	Winner
0	99	ITAEEEEEIGEDSQFMILAK			-0.0019	2281.07	3	21	1.1.1.1871.17	Winner
0	99	ITAEEEEEIGEDSQFMILAK			-0.0019	2281.07	3	13	1.1.1.1881.20	Winner
0	99	ITAEEEEEIGEDSQFMILAK			-0.0014	2281.07	3	15	1.1.1.1989.19	Winner
0	99	ITAEEEEEIGEDSQFMILAK			-0.001	2281.07	3	16	1.1.1.1905.21	Winner
0	99	ITAEEEEEIGEDSQFMILAK			-0.0014	2281.07	3	25	1.1.1.1865.11	Winner
0	99	ITAEEEEEIGEDSQFMILAK			0.0078	2281.08	2	13	1.1.1.1838.11	Winner
0	99	ITAEEEEEIGEDSQFMILAK			0.0078	2281.08	2	14	1.1.1.1841.18	Winner
0	99	ITAEEEEEIGEDSQFMILAK			0.0047	2281.07	3	27	1.1.1.1823.6	Winner
0	99	ITAEEEEEIGEDSQFMILAK			0.0078	2281.08	2	21	1.1.1.1839.9	Winner
0	99	ITAEEEEEIGEDSQFMILAK			0.0076	2281.08	2	19	1.1.1.1842.10	Winner
0	99	KDLVKNEELEIQEK		missed K-D@1; missed K-N@5	-0.0028	1713.91	3	16	1.1.1.1222.9	Winner
0	99	KDLVKNEELEIQEK		missed K-D@1; missed K-N@5	-0.0022	1713.91	3	18	1.1.1.1198.6	Winner
0	99	KDLVKNEELEIQEK		missed K-D@1; missed K-N@5	-0.0022	1713.91	3	16	1.1.1.1191.11	Winner
0	99	KDLVKNEELEIQEK		missed K-D@1; missed K-N@5	-0.0004	1713.91	3	16	1.1.1.1228.11	Winner
0	99	KDLVKNEELEIQEK		missed K-D@1; missed K-N@5	0.0034	1713.92	3	14	1.1.1.1210.10	Winner
0	99	KDLVKNEELEIQEK		missed K-D@1; missed K-N@5	0.0005	1713.92	3	16	1.1.1.1248.7	Winner
0	99	KDLVKNEELEIQEK		missed K-D@1; missed K-N@5	-0.0004	1713.91	3	15	1.1.1.1238.11	Winner
0	99	KDLVKNEELEIQEK		missed K-D@1; missed K-N@5	-0.0004	1713.91	3	16	1.1.1.1233.10	Winner
0	99	KDLVKNEELEIQEK		missed K-D@1; missed K-N@5	-0.0031	1713.91	3	14	1.1.1.1204.11	Winner
2	99	KDLVKNEELEIQEK		missed K-D@1; missed K-N@5	-0.0031	1713.91	3	17	1.1.1.1216.7	Winner
0	99	KEPSLESGVHSFEEGSELSK		missed K-E@1	-0.0016	2175.03	3	19	1.1.1.1410.9	Winner
0	99	KEPSLESGVHSFEEGSELSK		missed K-E@1	-0.0016	2175.03	3	21	1.1.1.1406.16	Winner
0	99	KEPSLESGVHSFEEGSELSK		missed K-E@1	-0.0016	2175.03	3	19	1.1.1.1404.8	Winner
0	99	KEPSLESGVHSFEEGSELSK		missed K-E@1	-0.0016	2175.03	3	18	1.1.1.1420.15	Winner
0	99	KEPSLESGVHSFEEGSELSK		missed K-E@1	-0.0016	2175.03	3	16	1.1.1.1422.18	Winner
0	99	KEPSLESGVHSFEEGSELSK		missed K-E@1	-0.0016	2175.03	3	17	1.1.1.1419.10	Winner
0	99	KEPSLESGVHSFEEGSELSK		missed K-E@1	-0.0016	2175.03	3	14	1.1.1.1412.15	Winner
0	99	KEPSLESGVHSFEEGSELSK		missed K-E@1	-0.0016	2175.03	3	23	1.1.1.1405.12	Winner
0	99	KEPSLESGVHSFEEGSELSK		missed K-E@1	-0.0016	2175.03	3	11	1.1.1.1438.15	Winner
0	99	KEPSLESGVHSFEEGSELSK		missed K-E@1	-0.0016	2175.03	3	18	1.1.1.1407.16	Winner
0	99	KEPSLESGVHSFEEGSELSK		missed K-E@1	-0.0016	2175.03	3	20	1.1.1.1415.9	Winner
0	99	KEPSLESGVHSFEEGSELSK		missed K-E@1	0.0013	2175.03	4	16	1.1.1.1392.11	Winner
0	99	KEPSLESGVHSFEEGSELSK		missed K-E@1	-0.0016	2175.03	3	19	1.1.1.1414.8	Winner
0	99	KEPSLESGVHSFEEGSELSK		missed K-E@1	-0.0016	2175.03	3	17	1.1.1.1416.11	Winner
0	99	KEPSLESGVHSFEEGSELSK		missed K-E@1	0.0006	2175.03	4	20	1.1.1.1403.11	Winner
0	99	KEPSLESGVHSFEEGSELSK		missed K-E@1	0.0001	2175.03	4	22	1.1.1.1413.6	Winner
0	99	KEPSLESGVHSFEEGSELSK		missed K-E@1	0.0001	2175.03	4	22	1.1.1.1408.8	Winner
0	99	KEPSLESGVHSFEEGSELSK		missed K-E@1	0.001	2175.03	4	14	1.1.1.1433.3	Winner
0	99	KEPSLESGVHSFEEGSELSK		missed K-E@1	0.001	2175.03	4	17	1.1.1.1428.7	Winner
0	99	KEPSLESGVHSFEEGSELSK		missed K-E@1	0.001	2175.03	4	13	1.1.1.1387.6	Winner
0	99	KEPSLESGVHSFEEGSELSK		missed K-E@1	0.001	2175.03	4	21	1.1.1.1439.7	Winner
0	99	KEPSLESGVHSFEEGSELSK		missed K-E@1	-0.0016	2175.03	3	16	1.1.1.1417.20	Winner
0	99	KEPSLESGVHSFEEGSELSK		missed K-E@1	-0.0016	2175.03	3	24	1.1.1.1411.15	Winner
0	99	KEPSLESGVHSFEEGSELSK		missed K-E@1	-0.0007	2175.03	4	16	1.1.1.1458.4	Winner
0	99	KEPSLESGVHSFEEGSELSK		missed K-E@1	0.0001	2175.03	4	22	1.1.1.1418.7	Winner
0	99	KEPSLESGVHSFEEGSELSK		missed K-E@1	0.0001	2175.03	4	19	1.1.1.1423.7	Winner
0	99	KEPSLESGVHSFEEGSELSK		missed K-E@1	0.0018	2175.03	4	19	1.1.1.1397.8	Winner
0	99	KEPSLESGVHSFEEGSELSK		missed K-E@1	-0.0022	2175.03	3	11	1.1.1.1440.11	Winner
0	99	KEPSLESGVHSFEEGSELSK		missed K-E@1	-0.0025	2175.03	3	10	1.1.1.1456.11	Winner
0	99	KEPSLESGVHSFEEGSELSK		missed K-E@1	-0.0043	2175.03	4	11	1.1.1.1469.8	Winner
0	99	KEPSLESGVHSFEEGSELSK		missed K-E@1	-0.0025	2175.03	3	10	1.1.1.1435.11	Winner
0	99	KEPSLESGVHSFEEGSELSK		missed K-E@1	-0.0016	2175.03	3	18	1.1.1.1409.8	Winner
2	99	KEPSLESGVHSFEEGSELSK		missed K-E@1	-0.0022	2175.03	3	18	1.1.1.1432.16	Winner
0	99	KEPSLESGVHSFEEGSELSK		missed K-E@1	-0.0022	2175.03	3	16	1.1.1.1436.11	Winner
0	99	KKEPSLESGVHSFEEGSELSK		missed K-K@1; missed K-E@2	0.0025	2303.13	4	12	1.1.1.1721.14	Winner
0	99	KKEPSLESGVHSFEEGSELSK		missed K-K@1; missed K-E@2	0.0025	2303.13	4	16	1.1.1.1529.11	Winner
0	99	KKEPSLESGVHSFEEGSELSK		missed K-K@1; missed K-E@2	0.0025	2303.13	4	21	1.1.1.1534.9	Winner
0	99	KKEPSLESGVHSFEEGSELSK		missed K-K@1; missed K-E@2	0.002	2303.13	4	23	1.1.1.1549.6	Winner
0	99	KKEPSLESGVHSFEEGSELSK		missed K-K@1; missed K-E@2	0.002	2303.13	4	21	1.1.1.1544.8	Winner
0	99	KKEPSLESGVHSFEEGSELSK		missed K-K@1; missed K-E@2	0.002	2303.13	4	17	1.1.1.1696.13	Winner
0	99	KKEPSLESGVHSFEEGSELSK		missed K-K@1; missed K-E@2	0.002	2303.13	4	19	1.1.1.1701.13	Winner
0	99	KKEPSLESGVHSFEEGSELSK		missed K-K@1; missed K-E@2	0.0018	2303.13	4	11	1.1.1.1806.7	Winner
0	99	KKEPSLESGVHSFEEGSELSK		missed K-K@1; missed K-E@2	0.0018	2303.13	4	18	1.1.1.1691.13	Winner
0	99	KKEPSLESGVHSFEEGSELSK		missed K-K@1; missed K-E@2	0.0014	2303.13	3	10	1.1.1.1699.6	Winner
0	99	KKEPSLESGVHSFEEGSELSK		missed K-K@1; missed K-E@2	0.0014	2303.13	3	13	1.1.1.1665.8	Winner
0	99	KKEPSLESGVHSFEEGSELSK		missed K-K@1; missed K-E@2	0.0018	2303.13	4	19	1.1.1.1524.12	Winner
0	99	KKEPSLESGVHSFEEGSELSK		missed K-K@1; missed K-E@2	0.0018	2303.13	4	14	1.1.1.1801.5	Winner
0	99	KKEPSLESGVHSFEEGSELSK		missed K-K@1; missed K-E@2	0.0018	2303.13	4	18	1.1.1.1519.6	Winner
0	99	KKEPSLESGVHSFEEGSELSK		missed K-K@1; missed K-E@2	0.0018	2303.13	4	24	1.1.1.1604.7	Winner
0	99	KKEPSLESGVHSFEEGSELSK		missed K-K@1; missed K-E@2	0.0018	2303.13	4	16	1.1.1.1785.8	Winner
0	99	KKEPSLESGVHSFEEGSELSK		missed K-K@1; missed K-E@2	0.001	2303.13	3	11	1.1.1.1682.15	Winner
0	99	KKEPSLESGVHSFEEGSELSK		missed K-K@1; missed K-E@2	0.001	2303.13	3	12	1.1.1.1627.11	Winner
0	99	KKEPSLESGVHSFEEGSELSK		missed K-K@1; missed K-E@2	0.001	2303.13	3	13	1.1.1.1631.10	Winner
0	99	KKEPSLESGVHSFEEGSELSK		missed K-K@1; missed K-E@2	0.0013	2303.13	4	23	1.1.1.1554.6	Winner
0	99	KKEPSLESGVHSFEEGSELSK		missed K-K@1; missed K-E@2	0.0013	2303.13	4	21	1.1.1.1599.10	Winner
0	99	KKEPSLESGVHSFEEGSELSK		missed K-K@1; missed K-E@2	0.0013	2303.13	4	20	1.1.1.1564.9	Winner
0	99	KKEPSLESGVHSFEEGSELSK		missed K-K@1; missed K-E@2	0.0014	2303.13	3	10	1.1.1.1695.12	Winner
0	99	KKEPSLESGVHSFEEGSELSK		missed K-K@1; missed K-E@2	0.0013	2303.13	4	22	1.1.1.1609.7	Winner
0	99	KKEPSLESGVHSFEEGSELSK		missed K-K@1; missed K-E@2	0.0013	2303.13	4	20	1.1.1.1559.8	Winner
0	99	KKEPSLESGVHSFEEGSELSK		missed K-K@1; missed K-E@2	0.0013	2303.13	4	18	1.1.1.1640.11	Winner
0	99	KKEPSLESGVHSFEEGSELSK		missed K-K@1; missed K-E@2	0.0013	2303.13	4	20	1.1.1.1646.12	Winner
0	99	KKEPSLESGVHSFEEGSELSK		missed K-K@1; missed K-E@2	0.0013	2303.13	4	19	1.1.1.1651.7	Winner
0	99	KKEPSLESGVHSFEEGSELSK		missed K-K@1; missed K-E@2	0.0037	2303.13	4	18	1.1.1.1726.11	Winner
0	99	KKEPSLESGVHSFEEGSELSK		missed K-K@1; missed K-E@2	0.0037	2303.13	4	13	1.1.1.1753.7	Winner
0	99	KKEPSLESGVHSFEEGSELSK		missed K-K@1; missed K-E@2	0.0069	2303.14	4	17	1.1.1.1736.10	Winner
0	99	KKEPSLESGVHSFEEGSELSK		missed K-K@1; missed K-E@2	0.0069	2303.14	4	17	1.1.1.1731.8	Winner
0	99	KKEPSLESGVHSFEEGSELSK		missed K-K@1; missed K-E@2	0.0037	2303.13	4	16	1.1.1.1759.10	Winner
0	99	KKEPSLESGVHSFEEGSELSK		missed K-K@1; missed K-E@2	0.0032	2303.13	4	18	1.1.1.1764.6	Winner
0	99	KKEPSLESGVHSFEEGSELSK		missed K-K@1; missed K-E@2	0.0032	2303.13	4	17	1.1.1.1747.9	Winner
0	99	KKEPSLESGVHSFEEGSELSK		missed K-K@1; missed K-E@2	-0.0043	2303.12	3	12	1.1.1.1567.12	Winner
0	99	KKEPSLESGVHSFEEGSELSK		missed K-K@1; missed K-E@2	0.003	2303.13	4	17	1.1.1.1769.9	Winner
0	99	KKEPSLESGVHSFEEGSELSK		missed K-K@1; missed K-E@2	0.003	2303.13	4	16	1.1.1.1681.15	Winner
0	99	KKEPSLESGVHSFEEGSELSK		missed K-K@1; missed K-E@2	0.003	2303.13	4	17	1.1.1.1676.13	Winner
0	99	KKEPSLESGVHSFEEGSELSK		missed K-K@1; missed K-E@2	0.0025	2303.13	4	16	1.1.1.1661.11	Winner
0	99	KKEPSLESGVHSFEEGSELSK		missed K-K@1; missed K-E@2	0.0025	2303.13	4	21	1.1.1.1539.7	Winner
0	99	KKEPSLESGVHSFEEGSELSK		missed K-K@1; missed K-E@2	0.0025	2303.13	4	16	1.1.1.1716.16	Winner
0	99	KKEPSLESGVHSFEEGSELSK		missed K-K@1; missed K-E@2	0.0025	2303.13	4	12	1.1.1.1813.7	Winner
0	99	KKEPSLESGVHSFEEGSELSK		missed K-K@1; missed K-E@2	0.003	2303.13	4	14	1.1.1.1711.14	Winner
0	99	KKEPSLESGVHSFEEGSELSK		missed K-K@1; missed K-E@2	0.003	2303.13	4	15	1.1.1.1791.9	Winner
0	99	KKEPSLESGVHSFEEGSELSK		missed K-K@1; missed K-E@2	0.003	2303.13	4	16	1.1.1.1686.10	Winner
0	99	KKEPSLESGVHSFEEGSELSK		missed K-K@1; missed K-E@2	0.0032	2303.13	4	13	1.1.1.1741.11	Winner
0	99	KKEPSLESGVHSFEEGSELSK		missed K-K@1; missed K-E@2	0.003	2303.13	4	18	1.1.1.1666.12	Winner
0	99	KKEPSLESGVHSFEEGSELSK		missed K-K@1; missed K-E@2	0.003	2303.13	4	21	1.1.1.1706.10	Winner
0	99	KKEPSLESGVHSFEEGSELSK		missed K-K@1; missed K-E@2	0.003	2303.13	4	17	1.1.1.1774.9	Winner
0	99	KKEPSLESGVHSFEEGSELSK		missed K-K@1; missed K-E@2	0.003	2303.13	4	17	1.1.1.1779.10	Winner
0	99	KKEPSLESGVHSFEEGSELSK		missed K-K@1; missed K-E@2	0.003	2303.13	4	21	1.1.1.1671.13	Winner
0	99	KKEPSLESGVHSFEEGSELSK		missed K-K@1; missed K-E@2	-0.0006	2303.13	3	12	1.1.1.1527.14	Winner
0	99	KKEPSLESGVHSFEEGSELSK		missed K-K@1; missed K-E@2	-0.0006	2303.13	3	14	1.1.1.1530.12	Winner
0	99	KKEPSLESGVHSFEEGSELSK		missed K-K@1; missed K-E@2	-0.0006	2303.13	3	11	1.1.1.1575.12	Winner
0	99	KKEPSLESGVHSFEEGSELSK		missed K-K@1; missed K-E@2	-0.0006	2303.13	3	12	1.1.1.1571.16	Winner
0	99	KKEPSLESGVHSFEEGSELSK		missed K-K@1; missed K-E@2	-0.0006	2303.13	3	13	1.1.1.1570.11	Winner
0	99	KKEPSLESGVHSFEEGSELSK		missed K-K@1; missed K-E@2	-0.0006	2303.13	3	16	1.1.1.1573.9	Winner
0	99	KKEPSLESGVHSFEEGSELSK		missed K-K@1; missed K-E@2	-0.001	2303.13	3	11	1.1.1.1590.13	Winner
0	99	KKEPSLESGVHSFEEGSELSK		missed K-K@1; missed K-E@2	-0.001	2303.13	3	17	1.1.1.1588.11	Winner
0	99	KKEPSLESGVHSFEEGSELSK		missed K-K@1; missed K-E@2	-0.001	2303.13	3	12	1.1.1.1586.11	Winner
0	99	KKEPSLESGVHSFEEGSELSK		missed K-K@1; missed K-E@2	-0.001	2303.13	3	15	1.1.1.1587.13	Winner
0	99	KKEPSLESGVHSFEEGSELSK		missed K-K@1; missed K-E@2	0.0001	2303.13	4	16	1.1.1.1453.8	Winner
0	99	KKEPSLESGVHSFEEGSELSK		missed K-K@1; missed K-E@2	0.0001	2303.13	3	14	1.1.1.1620.9	Winner
0	99	KKEPSLESGVHSFEEGSELSK		missed K-K@1; missed K-E@2	-0.0001	2303.13	3	16	1.1.1.1547.6	Winner
0	99	KKEPSLESGVHSFEEGSELSK		missed K-K@1; missed K-E@2	0.0001	2303.13	3	15	1.1.1.1621.14	Winner
0	99	KKEPSLESGVHSFEEGSELSK		missed K-K@1; missed K-E@2	0.0001	2303.13	3	19	1.1.1.1550.4	Winner
0	99	KKEPSLESGVHSFEEGSELSK		missed K-K@1; missed K-E@2	0.0001	2303.13	3	14	1.1.1.1552.7	Winner
0	99	KKEPSLESGVHSFEEGSELSK		missed K-K@1; missed K-E@2	-0.0001	2303.13	3	13	1.1.1.1545.5	Winner
0	99	KKEPSLESGVHSFEEGSELSK		missed K-K@1; missed K-E@2	-0.0006	2303.13	3	12	1.1.1.1522.11	Winner
0	99	KKEPSLESGVHSFEEGSELSK		missed K-K@1; missed K-E@2	-0.0004	2303.13	3	11	1.1.1.1521.10	Winner
0	99	KKEPSLESGVHSFEEGSELSK		missed K-K@1; missed K-E@2	-0.0006	2303.13	3	14	1.1.1.1528.9	Winner
0	99	KKEPSLESGVHSFEEGSELSK		missed K-K@1; missed K-E@2	-0.0006	2303.13	3	14	1.1.1.1572.16	Winner
0	99	KKEPSLESGVHSFEEGSELSK		missed K-K@1; missed K-E@2	-0.0039	2303.12	3	14	1.1.1.1581.14	Winner
0	99	KKEPSLESGVHSFEEGSELSK		missed K-K@1; missed K-E@2	-0.0039	2303.12	3	11	1.1.1.1502.11	Winner
0	99	KKEPSLESGVHSFEEGSELSK		missed K-K@1; missed K-E@2	-0.0039	2303.12	3	18	1.1.1.1578.11	Winner
0	99	KKEPSLESGVHSFEEGSELSK		missed K-K@1; missed K-E@2	-0.0039	2303.12	3	12	1.1.1.1508.8	Winner
0	99	KKEPSLESGVHSFEEGSELSK		missed K-K@1; missed K-E@2	-0.0039	2303.12	3	11	1.1.1.1598.12	Winner
0	99	KKEPSLESGVHSFEEGSELSK		missed K-K@1; missed K-E@2	-0.0039	2303.12	3	10	1.1.1.1501.12	Winner
0	99	KKEPSLESGVHSFEEGSELSK		missed K-K@1; missed K-E@2	-0.0043	2303.12	3	12	1.1.1.1561.16	Winner
0	99	KKEPSLESGVHSFEEGSELSK		missed K-K@1; missed K-E@2	-0.0043	2303.12	3	13	1.1.1.1568.13	Winner
2	99	KKEPSLESGVHSFEEGSELSK		missed K-K@1; missed K-E@2	-0.0043	2303.12	3	15	1.1.1.1562.10	Winner
0	99	KKEPSLESGVHSFEEGSELSK		missed K-K@1; missed K-E@2	-0.0043	2303.12	3	13	1.1.1.1518.9	Winner
0	99	KKEPSLESGVHSFEEGSELSK		missed K-K@1; missed K-E@2	-0.0043	2303.12	3	15	1.1.1.1563.9	Winner
0	99	KKEPSLESGVHSFEEGSELSK		missed K-K@1; missed K-E@2	-0.0039	2303.12	3	12	1.1.1.1505.10	Winner
0	99	KKEPSLESGVHSFEEGSELSK		missed K-K@1; missed K-E@2	-0.0043	2303.12	3	15	1.1.1.1565.12	Winner
0	99	KKEPSLESGVHSFEEGSELSK		missed K-K@1; missed K-E@2	-0.0043	2303.12	3	14	1.1.1.1566.15	Winner
0	99	KKEPSLESGVHSFEEGSELSK		missed K-K@1; missed K-E@2	-0.0039	2303.12	3	9	1.1.1.1596.18	Winner
0	99	KKEPSLESGVHSFEEGSELSK		missed K-K@1; missed K-E@2	-0.0036	2303.12	4	17	1.1.1.1464.8	Winner
0	99	KKEPSLESGVHSFEEGSELSK		missed K-K@1; missed K-E@2	-0.0036	2303.12	4	18	1.1.1.1504.5	Winner
0	99	KKEPSLESGVHSFEEGSELSK		missed K-K@1; missed K-E@2	-0.0036	2303.12	4	18	1.1.1.1509.4	Winner
0	99	KKEPSLESGVHSFEEGSELSK		missed K-K@1; missed K-E@2	-0.0036	2303.12	4	15	1.1.1.1474.5	Winner
0	99	KKEPSLESGVHSFEEGSELSK		missed K-K@1; missed K-E@2	-0.0031	2303.12	4	20	1.1.1.1499.7	Winner
0	99	KKEPSLESGVHSFEEGSELSK		missed K-K@1; missed K-E@2	-0.0026	2303.13	4	15	1.1.1.1479.7	Winner
0	99	KKEPSLESGVHSFEEGSELSK		missed K-K@1; missed K-E@2	-0.0031	2303.12	4	19	1.1.1.1584.8	Winner
0	99	KKEPSLESGVHSFEEGSELSK		missed K-K@1; missed K-E@2	-0.0031	2303.12	4	21	1.1.1.1494.6	Winner
0	99	KKEPSLESGVHSFEEGSELSK		missed K-K@1; missed K-E@2	-0.0036	2303.12	4	11	1.1.1.1469.9	Winner
0	99	KKEPSLESGVHSFEEGSELSK		missed K-K@1; missed K-E@2	-0.0037	2303.12	3	17	1.1.1.1540.6	Winner
0	99	KKEPSLESGVHSFEEGSELSK		missed K-K@1; missed K-E@2	-0.0037	2303.12	3	12	1.1.1.1531.14	Winner
0	99	KKEPSLESGVHSFEEGSELSK		missed K-K@1; missed K-E@2	-0.0037	2303.12	3	18	1.1.1.1533.7	Winner
0	99	KKEPSLESGVHSFEEGSELSK		missed K-K@1; missed K-E@2	-0.0036	2303.12	4	16	1.1.1.1459.6	Winner
0	99	KKEPSLESGVHSFEEGSELSK		missed K-K@1; missed K-E@2	-0.0036	2303.12	4	23	1.1.1.1514.3	Winner
0	99	KKEPSLESGVHSFEEGSELSK		missed K-K@1; missed K-E@2	-0.0037	2303.12	3	15	1.1.1.1535.7	Winner
0	99	KKEPSLESGVHSFEEGSELSK		missed K-K@1; missed K-E@2	-0.0037	2303.12	3	11	1.1.1.1538.11	Winner
0	99	KKEPSLESGVHSFEEGSELSK		missed K-K@1; missed K-E@2	0.0008	2303.13	4	18	1.1.1.1589.7	Winner
0	99	KKEPSLESGVHSFEEGSELSK		missed K-K@1; missed K-E@2	0.0008	2303.13	4	16	1.1.1.1484.7	Winner
0	99	KKEPSLESGVHSFEEGSELSK		missed K-K@1; missed K-E@2	0.0008	2303.13	4	19	1.1.1.1569.9	Winner
0	99	KKEPSLESGVHSFEEGSELSK		missed K-K@1; missed K-E@2	0.0008	2303.13	4	17	1.1.1.1489.6	Winner
0	99	KKEPSLESGVHSFEEGSELSK		missed K-K@1; missed K-E@2	0.0005	2303.13	3	14	1.1.1.1639.5	Winner
0	99	KKEPSLESGVHSFEEGSELSK		missed K-K@1; missed K-E@2	0.0005	2303.13	3	15	1.1.1.1645.5	Winner
0	99	KKEPSLESGVHSFEEGSELSK		missed K-K@1; missed K-E@2	0.0005	2303.13	3	18	1.1.1.1557.10	Winner
0	99	KKEPSLESGVHSFEEGSELSK		missed K-K@1; missed K-E@2	0.0005	2303.13	3	10	1.1.1.1643.12	Winner
0	99	KKEPSLESGVHSFEEGSELSK		missed K-K@1; missed K-E@2	0.0008	2303.13	4	22	1.1.1.1629.7	Winner
0	99	KKEPSLESGVHSFEEGSELSK		missed K-K@1; missed K-E@2	0.0008	2303.13	4	18	1.1.1.1594.8	Winner
0	99	KKEPSLESGVHSFEEGSELSK		missed K-K@1; missed K-E@2	0.0008	2303.13	4	22	1.1.1.1574.9	Winner
0	99	KKEPSLESGVHSFEEGSELSK		missed K-K@1; missed K-E@2	0.0008	2303.13	3	11	1.1.1.1616.10	Winner
0	99	KKEPSLESGVHSFEEGSELSK		missed K-K@1; missed K-E@2	0.0008	2303.13	3	19	1.1.1.1618.7	Winner
0	99	KKEPSLESGVHSFEEGSELSK		missed K-K@1; missed K-E@2	0.0008	2303.13	3	13	1.1.1.1617.13	Winner
0	99	KKEPSLESGVHSFEEGSELSK		missed K-K@1; missed K-E@2	0.0008	2303.13	4	15	1.1.1.1634.11	Winner
0	99	KKEPSLESGVHSFEEGSELSK		missed K-K@1; missed K-E@2	0.0008	2303.13	4	21	1.1.1.1624.7	Winner
0	99	KKEPSLESGVHSFEEGSELSK		missed K-K@1; missed K-E@2	0.0008	2303.13	4	21	1.1.1.1619.9	Winner
0	99	KKEPSLESGVHSFEEGSELSK		missed K-K@1; missed K-E@2	0.0008	2303.13	4	20	1.1.1.1656.8	Winner
0	99	KKEPSLESGVHSFEEGSELSK		missed K-K@1; missed K-E@2	0.0001	2303.13	3	16	1.1.1.1607.17	Winner
0	99	KKEPSLESGVHSFEEGSELSK		missed K-K@1; missed K-E@2	0.0001	2303.13	3	14	1.1.1.1551.12	Winner
0	99	KKEPSLESGVHSFEEGSELSK		missed K-K@1; missed K-E@2	0.0001	2303.13	3	14	1.1.1.1623.5	Winner
0	99	KKEPSLESGVHSFEEGSELSK		missed K-K@1; missed K-E@2	0.0008	2303.13	4	23	1.1.1.1614.6	Winner
0	99	KKEPSLESGVHSFEEGSELSK		missed K-K@1; missed K-E@2	0.0008	2303.13	4	18	1.1.1.1579.8	Winner
0	99	KKEPSLESGVHSFEEGSELSK		missed K-K@1; missed K-E@2	0.0005	2303.13	3	15	1.1.1.1558.9	Winner
0	99	KKEPSLESGVHSFEEGSELSK		missed K-K@1; missed K-E@2	0.0001	2303.13	3	11	1.1.1.1626.15	Winner
0	99	KKEPSLESGVHSFEEGSELSK		missed K-K@1; missed K-E@2	0.0001	2303.13	3	11	1.1.1.1600.16	Winner
0	99	KLDGASHTKPGEK		missed K-L@1	-0.0012	1366.72	3	15	1.1.1.769.3	Winner
0	99	KLDGASHTKPGEK		missed K-L@1	-0.0012	1366.72	3	18	1.1.1.608.3	Winner
0	99	KLDGASHTKPGEK		missed K-L@1	-0.0003	1366.72	3	19	1.1.1.594.2	Winner
0	99	KLDGASHTKPGEK		missed K-L@1	-0.001	1366.72	3	18	1.1.1.618.3	Winner
0	99	KLDGASHTKPGEK		missed K-L@1	-0.0018	1366.72	3	18	1.1.1.714.2	Winner
0	99	KLDGASHTKPGEK		missed K-L@1	-0.0018	1366.72	3	17	1.1.1.640.2	Winner
2	99	KLDGASHTKPGEK		missed K-L@1	-0.0045	1366.72	3	16	1.1.1.755.2	Winner
0	99	KLDGASHTKPGEK		missed K-L@1	-0.0015	1366.72	3	17	1.1.1.669.2	Winner
0	99	KLDGASHTKPGEK		missed K-L@1	-0.0012	1366.72	3	11	1.1.1.788.3	Winner
0	99	KLDGASHTKPGEK		missed K-L@1	-0.0015	1366.72	3	15	1.1.1.732.2	Winner
0	99	KLDGASHTKPGEK		missed K-L@1	-0.0015	1366.72	3	16	1.1.1.692.2	Winner
0.72	99	LAALSDHN		cleaved N-P@C-term	0.0006	839.414	2	8	1.1.1.920.4	Winner
0	99	LAALSDHNPSAPR			0.0012	1347.69	3	17	1.1.1.1041.3	Winner
0	99	LAALSDHNPSAPR			0.0012	1347.69	3	15	1.1.1.1052.5	Winner
0	99	LAALSDHNPSAPR			-0.0063	1347.68	3	9	1.1.1.1098.5	Winner
2	99	LAALSDHNPSAPR			-0.0006	1347.69	2	20	1.1.1.1044.16	Winner
0	99	LAALSDHNPSAPR			0.0012	1347.69	3	17	1.1.1.1035.6	Winner
0	99	LAALSDHNPSAPR			0.0012	1347.69	3	16	1.1.1.1029.6	Winner
0	99	LAALSDHNPSAPR			0.0012	1347.69	3	15	1.1.1.1047.5	Winner
0	99	LAALSDHNPSAPR			0.0018	1347.69	3	12	1.1.1.1072.5	Winner
0	99	LAALSDHNPSAPR			0.0015	1347.69	3	15	1.1.1.1057.5	Winner
0	99	LAALSDHNPSAPR			0.0012	1347.69	3	9	1.1.1.1023.6	Winner
0	99	LGADEDSFVILEPETNR			-0.0037	1903.91	2	20	1.1.1.2229.4	Winner
0	99	LGADEDSFVILEPETNR			0.0032	1903.92	2	13	1.1.1.1780.15	Winner
0	99	LGADEDSFVILEPETNR			0.0032	1903.92	2	23	1.1.1.1673.12	Winner
0	99	LGADEDSFVILEPETNR			0.003	1903.92	2	22	1.1.1.1678.16	Winner
0	99	LGADEDSFVILEPETNR			0.0037	1903.92	2	15	1.1.1.1748.17	Winner
0	99	LGADEDSFVILEPETNR			0.0034	1903.92	2	21	1.1.1.1668.7	Winner
0	99	LGADEDSFVILEPETNR			0.0034	1903.92	2	21	1.1.1.1743.10	Winner
0	99	LGADEDSFVILEPETNR			0.003	1903.92	2	24	1.1.1.1688.16	Winner
0	99	LGADEDSFVILEPETNR			0.003	1903.92	2	15	1.1.1.1760.15	Winner
0	99	LGADEDSFVILEPETNR			0.003	1903.92	2	20	1.1.1.1723.14	Winner
0	99	LGADEDSFVILEPETNR			0.0028	1903.92	2	21	1.1.1.1728.8	Winner
0	99	LGADEDSFVILEPETNR			0.003	1903.92	2	24	1.1.1.1683.15	Winner
0	99	LGADEDSFVILEPETNR			0.003	1903.92	2	20	1.1.1.1703.20	Winner
0	99	LGADEDSFVILEPETNR			0.0071	1903.92	2	15	1.1.1.1754.13	Winner
0	99	LGADEDSFVILEPETNR			0.0071	1903.92	2	17	1.1.1.1807.18	Winner
0	99	LGADEDSFVILEPETNR			0.0071	1903.92	2	15	1.1.1.1772.9	Winner
0	99	LGADEDSFVILEPETNR			0.0148	1903.93	2	17	1.1.1.1701.16	Winner
0	99	LGADEDSFVILEPETNR			0.008	1903.92	2	11	1.1.1.1787.14	Winner
0	99	LGADEDSFVILEPETNR			0.0018	1903.92	2	20	1.1.1.1733.10	Winner
0	99	LGADEDSFVILEPETNR			0.002	1903.92	2	15	1.1.1.1738.10	Winner
0	99	LGADEDSFVILEPETNR			-0.0008	1903.92	2	13	1.1.1.1816.13	Winner
0	99	LGADEDSFVILEPETNR			0.003	1903.92	2	24	1.1.1.1693.20	Winner
2	99	LGADEDSFVILEPETNR			-0.001	1903.92	2	19	1.1.1.1650.8	Winner
0	99	LGADEDSFVILEPETNR			0.0026	1903.92	2	23	1.1.1.1708.20	Winner
0	99	LGADEDSFVILEPETNR			0.0028	1903.92	2	23	1.1.1.1698.19	Winner
0	99	LGADEDSFVILEPETNR			0.0026	1903.92	2	21	1.1.1.1713.14	Winner
0	99	LGADEDSFVILEPETNR			0.0024	1903.92	2	22	1.1.1.1718.14	Winner
0	99	LGADEDSFVILEPETNR			0.0026	1903.92	2	23	1.1.1.1645.6	Winner
0	99	LGADEDSFVILEPETNRELEALK		missed R-E@17	0.0003	2587.3	3	26	1.1.1.1863.7	Winner
2	99	LGADEDSFVILEPETNRELEALK		missed R-E@17	0.0032	2587.31	3	13	1.1.1.1825.19	Winner
0	99	LGADEDSFVILEPETNRELEALK		missed R-E@17	0.0032	2587.31	3	20	1.1.1.1857.11	Winner
0	99	LGADEDSFVILEPETNRELEALK		missed R-E@17	0.0018	2587.3	3	10	1.1.1.1892.12	Winner
0	99	LGADEDSFVILEPETNRELEALK		missed R-E@17	0.0034	2587.31	3	24	1.1.1.1852.12	Winner
0	99	LGADEDSFVILEPETNRELEALK		missed R-E@17	0.0041	2587.31	3	28	1.1.1.1847.16	Winner
0	99	LGADEDSFVILEPETNRELEALK		missed R-E@17	0.0041	2587.31	3	31	1.1.1.1830.16	Winner
0	99	LGADEDSFVILEPETNRELEALK		missed R-E@17	0.0043	2587.31	3	15	1.1.1.1818.8	Winner
0	99	LGADEDSFVILEPETNRELEALK		missed R-E@17	0.0067	2587.31	3	14	1.1.1.1812.9	Winner
0	99	LGADEDSFVILEPETNRELEALK		missed R-E@17	0.0041	2587.31	3	27	1.1.1.1835.15	Winner
0	99	LGADEDSFVILEPETNRELEALK		missed R-E@17	0.0041	2587.31	3	26	1.1.1.1841.15	Winner
2	99	LSEPSLPIEDSQDLYNASPEPK			-0.0009	2428.16	2	15	1.1.1.1661.18	Winner
0	99	LSEPSLPIEDSQDLYNASPEPK			-0.0009	2428.16	2	15	1.1.1.1648.13	Winner
0	99	LSEPSLPIEDSQDLYNASPEPK			0.0018	2428.17	3	30	1.1.1.1664.12	Winner
0	99	LSEPSLPIEDSQDLYNASPEPK			0.0018	2428.17	3	33	1.1.1.1659.14	Winner
0	99	LSEPSLPIEDSQDLYNASPEPK			0.0022	2428.17	3	20	1.1.1.1674.18	Winner
0	99	LSEPSLPIEDSQDLYNASPEPK			-0.0009	2428.16	2	20	1.1.1.1656.13	Winner
0	99	LSEPSLPIEDSQDLYNASPEPK			-0.0009	2428.16	2	14	1.1.1.1667.9	Winner
0	99	LSEPSLPIEDSQDLYNASPEPK			-0.0009	2428.16	2	20	1.1.1.1653.10	Winner
0	99	LSEPSLPIEDSQDLYNASPEPK			-0.0009	2428.16	2	19	1.1.1.1660.12	Winner
0	99	LSEPSLPIEDSQDLYNASPEPK			-0.0009	2428.16	2	12	1.1.1.1666.18	Winner
0	99	LSEPSLPIEDSQDLYNASPEPK			-0.0009	2428.16	2	20	1.1.1.1663.8	Winner
0	99	LSEPSLPIEDSQDLYNASPEPK			-0.0009	2428.16	2	13	1.1.1.1652.21	Winner
0	99	LSEPSLPIEDSQDLYNASPEPK			-0.0009	2428.16	2	12	1.1.1.1665.12	Winner
0	99	LSEPSLPIEDSQDLYNASPEPK			-0.0009	2428.16	2	20	1.1.1.1655.13	Winner
0	99	LSEPSLPIEDSQDLYNASPEPK			-0.0009	2428.16	2	19	1.1.1.1650.9	Winner
0	99	LSEPSLPIEDSQDLYNASPEPK			0.0018	2428.17	3	30	1.1.1.1649.21	Winner
0	99	LSEPSLPIEDSQDLYNASPEPK			0.0018	2428.17	3	27	1.1.1.1669.15	Winner
0	99	LSEPSLPIEDSQDLYNASPEPK			0.0018	2428.17	3	31	1.1.1.1654.11	Winner
0	99	LSEPSLPIEDSQDLYNASPEPK			0.0013	2428.17	3	23	1.1.1.1644.18	Winner
0	99	LSEPSLPIEDSQDLYNASPEPK			-0.0009	2428.16	2	23	1.1.1.1662.8	Winner
0	99	LSEPSLPIEDSQDLYNASPEPK			-0.0009	2428.16	2	19	1.1.1.1658.11	Winner
0	99	LSEPSLPIEDSQDLYNASPEPK			-0.0009	2428.16	2	19	1.1.1.1657.16	Winner
0	99	MGYFPTEEK			-0.0004	1100.48	2	14	1.1.1.1284.8	Winner
0	99	MGYFPTEEK			-0.0004	1100.48	2	13	1.1.1.1273.11	Winner
0	99	MGYFPTEEK			-0.0004	1100.48	2	14	1.1.1.1279.12	Winner
0	99	MGYFPTEEK			-0.0004	1100.48	2	12	1.1.1.1289.7	Winner
0	99	MGYFPTEEKSETDENSGK		missed K-S@9	-0.0048	2047.86	3	22	1.1.1.1202.6	Winner
0	99	MGYFPTEEKSETDENSGK		missed K-S@9	-0.0022	2047.87	3	18	1.1.1.1190.9	Winner
0	99	MGYFPTEEKSETDENSGK		missed K-S@9	-0.0013	2047.87	3	15	1.1.1.1209.12	Winner
2	99	MGYFPTEEKSETDENSGK		missed K-S@9	-0.0051	2047.86	3	22	1.1.1.1196.4	Winner
0	99	NASRPMVIQESK			-0.0003	1358.7	3	14	1.1.1.947.4	Winner
0	99	NASRPMVIQESK			0	1358.7	3	15	1.1.1.953.8	Winner
2	99	NEELEIQEK			-0.0006	1130.55	2	15	1.1.1.1085.17	Winner
0	99	NEELEIQEK			-0.0006	1130.55	2	10	1.1.1.1096.19	Winner
0	99	NEELEIQEK			-0.0003	1130.55	2	13	1.1.1.1090.17	Winner
0	99	NEELEIQEK			-0.0006	1130.55	2	15	1.1.1.1080.13	Winner
0	99	NEELEIQEK			-0.0006	1130.55	2	15	1.1.1.1075.13	Winner
0	99	NEELEIQEK			-0.0008	1130.54	2	14	1.1.1.1070.13	Winner
0	99	NEELEIQEK			-0.0008	1130.54	2	14	1.1.1.1065.13	Winner
0	99	NEELEIQEK			-0.0008	1130.54	2	10	1.1.1.1102.16	Winner
0	99	NFVFHTLSPVK			-0.0016	1287.7	2	10	1.1.1.1468.14	Winner
0	99	NFVFHTLSPVK			-0.0016	1287.7	2	12	1.1.1.1473.11	Winner
0	99	NFVFHTLSPVK			-0.0036	1287.69	2	12	1.1.1.1452.7	Winner
2	99	NFVFHTLSPVK			-0.0016	1287.7	2	15	1.1.1.1463.9	Winner
0	99	NIDDASQMDLFHR			0.0012	1560.7	3	13	1.1.1.1457.10	Winner
0	99	NIDDASQMDLFHR			0.0012	1560.7	3	15	1.1.1.1451.4	Winner
0	99	NIDDASQMDLFHR			0.0012	1560.7	3	14	1.1.1.1445.4	Winner
0	99	NPFEAIRPGSAQQVK			0.0007	1640.86	2	17	1.1.1.1260.19	Winner
0	99	NPFEAIRPGSAQQVK			0.001	1640.86	3	13	1.1.1.1282.13	Winner
0	99	NPFEAIRPGSAQQVK			0.0007	1640.86	2	23	1.1.1.1265.21	Winner
2	99	NPFEAIRPGSAQQVK			0.0007	1640.86	2	23	1.1.1.1277.15	Winner
0	99	NPFEAIRPGSAQQVK			0.0007	1640.86	2	23	1.1.1.1271.18	Winner
0	99	NPFEAIRPGSAQQVK			0.0006	1640.86	3	14	1.1.1.1272.13	Winner
0	99	NPFEAIRPGSAQQVK			0.0006	1640.86	3	13	1.1.1.1287.9	Winner
0	99	NQYQALKPR			0.0011	1116.61	2	9	1.1.1.915.10	Winner
0	99	NQYQALKPR			-0.0002	1116.6	2	15	1.1.1.930.7	Winner
2	99	NQYQALKPR			-0.0002	1116.6	2	15	1.1.1.925.8	Winner
0	99	NQYQALKPR			-0.0002	1116.6	2	14	1.1.1.920.11	Winner
0	99	NQYQALKPR			-0.0004	1116.6	2	15	1.1.1.935.9	Winner
0	99	PMVIQESK		cleaved R-P@N-term	0.0002	930.485	2	13	1.1.1.973.5	Winner
0	99	PMVIQESK		cleaved R-P@N-term	0.0002	930.485	2	12	1.1.1.983.8	Winner
0	99	PMVIQESK		cleaved R-P@N-term	0	930.485	2	12	1.1.1.988.4	Winner
0	99	PMVIQESK		cleaved R-P@N-term	0.0002	930.485	2	13	1.1.1.968.5	Winner
0	99	PMVIQESK		cleaved R-P@N-term	0.0002	930.485	2	12	1.1.1.978.10	Winner
0	99	QLGVDVSIKPR			-0.0018	1210.7	3	8	1.1.1.1371.2	Winner
0	99	QLGVDVSIKPR			0.0018	1210.71	3	9	1.1.1.1287.2	Winner
0.78	99	QSDIRPSPGDSSVLQQESNFLGNNHSEE		cleaved E-C@C-term	0.0012	3070.39	3	18	1.1.1.1539.10	Winner
1.47	99	QYQALKPR		cleaved N-Q@N-term	0.0015	1002.56	2	9	1.1.1.926.7	Winner
0	99	RGPSFMTSPSPK		missed R-G@1	-0.0022	1290.64	2	12	1.1.1.1093.16	Winner
0	99	RGPSFMTSPSPK		missed R-G@1	-0.0022	1290.64	2	11	1.1.1.1088.14	Winner
0	99	RGPSFMTSPSPK		missed R-G@1	-0.0022	1290.64	2	9	1.1.1.1099.10	Winner
1.34	99	RGPSFMTSPSPK		missed R-G@1	-0.9931	1289.65	3	11	1.1.1.1085.2	Winner
0	99	SLSSDSTLLLFK			0.0031	1309.72	2	15	1.1.1.1780.13	Winner
0	99	SLSSDSTLLLFK			0.0024	1309.72	2	21	1.1.1.1724.7	Winner
0	99	SLSSDSTLLLFK			0.0029	1309.72	2	19	1.1.1.1749.11	Winner
0	99	SLSSDSTLLLFK			0.0025	1309.72	2	20	1.1.1.1739.11	Winner
0	99	SLSSDSTLLLFK			0.0027	1309.72	2	13	1.1.1.1775.20	Winner
0	99	SLSSDSTLLLFK			0.0025	1309.72	2	21	1.1.1.1729.9	Winner
0	99	SLSSDSTLLLFK			0.0027	1309.72	2	20	1.1.1.1744.12	Winner
0	99	SLSSDSTLLLFK			0.0025	1309.72	2	21	1.1.1.1734.9	Winner
0	99	SLSSDSTLLLFK			0.0123	1309.73	2	11	1.1.1.1845.9	Winner
0	99	SLSSDSTLLLFK			0.0053	1309.72	2	15	1.1.1.1817.5	Winner
0	99	SLSSDSTLLLFK			0.0049	1309.72	2	12	1.1.1.1786.17	Winner
0	99	SLSSDSTLLLFK			0.0049	1309.72	2	10	1.1.1.1853.16	Winner
0	99	SLSSDSTLLLFK			0.0019	1309.71	2	18	1.1.1.1770.13	Winner
0	99	SLSSDSTLLLFK			0.0019	1309.71	2	17	1.1.1.1714.10	Winner
0	99	SLSSDSTLLLFK			0.0003	1309.71	2	12	1.1.1.1704.5	Winner
0	99	SLSSDSTLLLFK			0.0019	1309.71	2	18	1.1.1.1760.12	Winner
0	99	SLSSDSTLLLFK			0.0021	1309.72	2	18	1.1.1.1755.8	Winner
0	99	SLSSDSTLLLFK			0.0019	1309.71	2	18	1.1.1.1719.11	Winner
0	99	SLSSDSTLLLFK			0.0019	1309.71	2	16	1.1.1.1765.11	Winner
0	99	SLSSDSTLLLFK			0.0002	1309.71	2	9	1.1.1.1802.16	Winner
2	99	SLSSDSTLLLFK			-0.0004	1309.71	2	16	1.1.1.1709.6	Winner
0	99	SLSSDSTLLLFK			-0.0017	1309.71	2	11	1.1.1.1807.13	Winner
0	99	SLYQENLEAQVK		cleaved K-P@C-term	-0.0007	1420.72	2	19	1.1.1.1322.13	Winner
2	99	SLYQENLEAQVK		cleaved K-P@C-term	-0.0007	1420.72	2	17	1.1.1.1327.16	Winner
0	99	SLYQENLEAQVK		cleaved K-P@C-term	-0.0007	1420.72	2	12	1.1.1.1317.15	Winner
0	99	SLYQENLEAQVK		cleaved K-P@C-term	-0.0007	1420.72	2	17	1.1.1.1332.9	Winner
0	99	SPSPGLFR			0.0008	859.456	2	12	1.1.1.1186.3	Winner
0	99	SSAVGPPEK			-0.0011	870.444	2	11	1.1.1.794.2	Winner
0	99	SSAVGPPEK			-0.0005	870.444	2	11	1.1.1.826.2	Winner
0	99	SSAVGPPEK			-0.0007	870.444	2	11	1.1.1.831.2	Winner
2	99	SSAVGPPEK			0.0009	870.446	2	13	1.1.1.821.2	Winner
0	99	SSAVGPPEK			0.0009	870.446	2	13	1.1.1.810.2	Winner
0	99	SSAVGPPEK			0.0009	870.446	2	13	1.1.1.816.2	Winner
0	99	TDDSTSGLTR			0.0001	1051.48	2	13	1.1.1.879.6	Winner
0	99	TDDSTSGLTR			-0.0018	1051.48	2	14	1.1.1.845.5	Winner
0	99	TDDSTSGLTR			-0.0015	1051.48	2	13	1.1.1.865.8	Winner
0	99	TDDSTSGLTR			0.0001	1051.48	2	11	1.1.1.885.4	Winner
0	99	TDDSTSGLTR			-0.0018	1051.48	2	15	1.1.1.860.9	Winner
2	99	TDDSTSGLTR			-0.0018	1051.48	2	17	1.1.1.850.5	Winner
0	99	TDDSTSGLTR			-0.0018	1051.48	2	16	1.1.1.855.7	Winner
0	99	TGSLLNQPK			0.0005	956.53	2	12	1.1.1.1014.8	Winner
0	99	TGSLLNQPK			0.0007	956.53	2	14	1.1.1.997.6	Winner
0	99	TGSLLNQPK			0.0007	956.53	2	14	1.1.1.991.7	Winner
0	99	TGSLLNQPK			0.0003	956.529	2	13	1.1.1.1020.6	Winner
0	99	TGSLLNQPK			0.0003	956.529	2	13	1.1.1.1026.8	Winner
0	99	TGSLLNQPK			0.0007	956.53	2	14	1.1.1.1003.7	Winner
0	99	TGSLLNQPK			0.0007	956.53	2	13	1.1.1.1009.7	Winner
0	99	TGSLLNQPK			0.0007	956.53	2	13	1.1.1.986.6	Winner
0	99	TGSLLNQPK			0.0009	956.53	2	13	1.1.1.981.4	Winner
2	99	TIHDFFK			0.0005	906.46	2	11	1.1.1.1277.4	Winner
0	99	TIHDFFK			0.0019	906.462	2	11	1.1.1.1271.6	Winner
0	99	TIHDFFK			0.0023	906.462	2	11	1.1.1.1265.4	Winner
0	99	TIHDFFK			0.0005	906.46	2	11	1.1.1.1287.6	Winner
0	99	TIHDFFK			0.0005	906.46	2	10	1.1.1.1282.7	Winner
0	99	TIHDFFK			0.0023	906.462	2	11	1.1.1.1255.5	Winner
0	99	TIHDFFK			0.0023	906.462	2	11	1.1.1.1240.4	Winner
0	99	TIHDFFK			0.0023	906.462	2	11	1.1.1.1260.7	Winner
0	99	TIHDFFK			0.0024	906.462	2	11	1.1.1.1235.6	Winner
1.8	99	TLFLGAGDFQF		cleaved F-C@C-term	0.0021	1214.6	2	7	1.1.1.2100.19	Winner
0	99	TVADSDESYMEK			0.0013	1373.57	2	20	1.1.1.1071.7	Winner
0	99	TVADSDESYMEK			0.0013	1373.57	2	21	1.1.1.1056.11	Winner
0	99	TVADSDESYMEK			0.0013	1373.57	2	18	1.1.1.1076.4	Winner
0	99	TVADSDESYMEK			0.0013	1373.57	2	20	1.1.1.1066.9	Winner
2	99	TVADSDESYMEK			0.0007	1373.57	2	21	1.1.1.1051.13	Winner
0	99	TVADSDESYMEK			-0.0019	1373.56	2	13	1.1.1.1086.5	Winner
0	99	TVADSDESYMEK			0.0013	1373.57	2	21	1.1.1.1061.9	Winner
0	99	TVADSDESYMEK			0.0009	1373.57	2	13	1.1.1.1046.13	Winner
0	99	TVADSDESYMEK			0.0009	1373.57	2	11	1.1.1.1081.10	Winner
2	99	VKNEELEIQEK		cleaved L-V@N-term; missed K-N@2	-0.0005	1357.71	2	11	1.1.1.1324.15	Winner
0	99	YLADGDLHSDGPGR			0.0004	1471.67	3	13	1.1.1.1115.11	Winner
0	99	YLADGDLHSDGPGR			0.0004	1471.67	3	14	1.1.1.1072.9	Winner
0	99	YLADGDLHSDGPGR			0.0004	1471.67	3	18	1.1.1.1087.8	Winner
0	99	YLADGDLHSDGPGR			0.0004	1471.67	3	14	1.1.1.1062.12	Winner
0	99	YLADGDLHSDGPGR			0.0004	1471.67	3	14	1.1.1.1067.11	Winner
0	99	YLADGDLHSDGPGR			0.0006	1471.67	3	12	1.1.1.1120.11	Winner
0	99	YLADGDLHSDGPGR			0.0004	1471.67	3	14	1.1.1.1077.9	Winner
0	99	YLADGDLHSDGPGR			0.0018	1471.67	3	10	1.1.1.1145.8	Winner
0	99	YLADGDLHSDGPGR			0.0018	1471.67	3	12	1.1.1.1140.9	Winner
0	99	YLADGDLHSDGPGR			0.0004	1471.67	3	18	1.1.1.1092.7	Winner
2	99	YLADGDLHSDGPGR			0.0004	1471.67	3	17	1.1.1.1082.8	Winner
0	99	YLADGDLHSDGPGR			0.0004	1471.67	3	16	1.1.1.1104.5	Winner
0	99	YLADGDLHSDGPGR			0.0004	1471.67	3	15	1.1.1.1110.9	Winner
0	99	YLADGDLHSDGPGR			0.0004	1471.67	3	18	1.1.1.1098.9	Winner
0	98.9	LSEPSLPIEDSQDLYNASPEPK			-0.0009	2428.16	2	9	1.1.1.1647.18	Winner
0	98.9	YLADGDLHSDGPGR			0.0039	1471.67	3	11	1.1.1.1207.6	Winner
0	98.8	TDDSTSGLTR			0.0001	1051.48	2	9	1.1.1.890.6	Winner
0	98.8	TGSLLNQPK			-0.0011	956.528	2	10	1.1.1.1032.5	Winner
0	98.8	YLADGDLHSDGPGR			0.0004	1471.67	3	12	1.1.1.1096.12	Winner
0	98.7	DLVKNEELEIQEK		missed K-N@4	2.0002	1587.82	3	12	1.1.1.1321.6	Winner
0	98.7	IHDFFK		cleaved T-I@N-term	0.0018	805.414	2	7	1.1.1.1242.2	Winner
0	98.7	MGYFPTEEK			0.0015	1100.49	2	11	1.1.1.1294.8	Winner
0	98.6	NPFEAIRPGSAQQVK			0.0006	1640.86	3	12	1.1.1.1266.10	Winner
0	98.6	TIHDFFK			0.0023	906.462	2	11	1.1.1.1250.4	Winner
0	98.5	KKEPSLESGVHSFEEGSELSK		missed K-K@1; missed K-E@2	-0.0006	2303.13	3	10	1.1.1.1523.10	Winner
0	98.5	KKEPSLESGVHSFEEGSELSK		missed K-K@1; missed K-E@2	-0.0039	2303.12	3	11	1.1.1.1580.12	Winner
0	98.5	KKEPSLESGVHSFEEGSELSK		missed K-K@1; missed K-E@2	0.001	2303.13	3	9	1.1.1.1672.12	Winner
0	98.5	LGADEDSFVILEPETNRELEALK		missed R-E@17	0.9908	2588.29	3	19	1.1.1.1869.8	Winner
0	98.5	NIDDASQMDLFHR			0.0014	1560.7	3	11	1.1.1.1439.6	Winner
0	98.5	TIHDFFK			0.0023	906.462	2	11	1.1.1.1245.3	Winner
0	98.3	RGPSFMTSPSPK		missed R-G@1	-0.9943	1289.64	3	10	1.1.1.1096.4	Winner
1.72	98.3	TMLDDDKR		missed K-R@7	-0.0016	992.458	2	10	1.1.1.845.4	Winner
0	98.3	YLADGDLHSDGPGR			0.0013	1471.67	3	11	1.1.1.1125.6	Winner
0	98.2	KKEPSLESGVHSFEEGSELSK		missed K-K@1; missed K-E@2	0.0001	2303.13	3	11	1.1.1.1608.12	Winner
0	98.1	SLYQENLEAQVKP		cleaved P-C@C-term	-0.0008	1517.77	2	14	1.1.1.1409.10	Winner
0	98	KKEPSLESGVHSFEEGSELSK		missed K-K@1; missed K-E@2	-0.001	2303.13	3	10	1.1.1.1592.17	Winner
0	98	NEELEIQEK			0.0016	1130.55	2	8	1.1.1.1060.16	Winner
0	98	SSAVGPPEK			0.0007	870.446	2	6	1.1.1.843.2	Winner
0	97.9	KDLVKNEELEIQEK		missed K-D@1; missed K-N@5	-0.0004	1713.91	3	11	1.1.1.1243.10	Winner
0	97.9	MGYFPTEEK			-0.0004	1100.48	2	11	1.1.1.1267.12	Winner
0	97.9	SPSPGLFR			0.0008	859.456	2	11	1.1.1.1199.3	Winner
0	97.9	SPSPGLFR			0.0008	859.456	2	11	1.1.1.1193.5	Winner
0	97.9	SPSPGLFR			0.0008	859.456	2	10	1.1.1.1175.4	Winner
0	97.8	SPSPGLFR			0.001	859.456	2	11	1.1.1.1181.4	Winner
0	97.7	IHDFFK		cleaved T-I@N-term	0.0018	805.414	2	7	1.1.1.1247.2	Winner
0	97.7	LAALSDHN		cleaved N-P@C-term	0.0006	839.414	2	7	1.1.1.915.3	Winner
0	97.7	SLSSDSTLLLFK			0.0055	1309.72	2	9	1.1.1.1792.18	Winner
0	97.5	DMGTDGKEELK		missed K-E@7	0.0015	1221.56	3	10	1.1.1.912.2	Winner
0	97.5	LAALSDHNPSAPR			0.0012	1347.69	3	11	1.1.1.1062.6	Winner
0	97.4	MGYFPTEEK			-0.0004	1100.48	2	11	1.1.1.1273.12	Winner
0	97.3	NEELEIQEK			-0.0002	1130.55	2	8	1.1.1.1108.14	Winner
0	97.3	TDDSTSGLTR			-0.0018	1051.48	2	10	1.1.1.870.9	Winner
0	97.1	AVGFLSVPK			0.0007	916.539	2	7	1.1.1.1483.6	Winner
0	97	TIHDFFK			0.0019	906.462	2	9	1.1.1.1230.5	Winner
0	96.9	KEPSLESGVHSFEEGSELSK		missed K-E@1	-0.0007	2175.03	4	9	1.1.1.1464.7	Winner
0	96.8	NASRPMVIQESK			0	1358.7	3	11	1.1.1.958.7	Winner
0	96.5	GTSFFPTAGGFR			-0.0012	1243.6	2	10	1.1.1.1601.11	Winner
0	96.5	KKEPSLESGVHSFEEGSELSK		missed K-K@1; missed K-E@2	-0.001	2303.13	3	9	1.1.1.1582.15	Winner
0	96.5	QLGVDVSIKPR			0.0033	1210.71	3	6	1.1.1.1482.2	Winner
0	96.3	KKEPSLESGVHSFEEGSELSK		missed K-K@1; missed K-E@2	0.0037	2303.13	4	11	1.1.1.1796.11	Winner
0	96.3	KKEPSLESGVHSFEEGSELSK		missed K-K@1; missed K-E@2	-0.0006	2303.13	3	9	1.1.1.1512.11	Winner
0	96.1	TMLDDDKR		missed K-R@7	-0.0016	992.458	2	9	1.1.1.850.4	Winner
0	96	EPSLESGVHSFEEGSELSK			-0.0021	2046.94	3	9	1.1.1.1512.9	Winner
0	95.9	QLGVDVSIKPR			0.0018	1210.71	3	8	1.1.1.1282.2	Winner
0	95.8	KKEPSLESGVHSFEEGSELSK		missed K-K@1; missed K-E@2	0.0005	2303.13	3	9	1.1.1.1641.15	Winner
0	95.8	LAALSDHN		cleaved N-P@C-term	0.0006	839.414	2	8	1.1.1.925.3	Winner
0	95.8	VKNEELEIQEK		cleaved L-V@N-term; missed K-N@2	0.0003	1357.71	2	7	1.1.1.1329.18	Winner
0	95.7	YLADGDLHSDGPGR			0.0009	1471.67	3	9	1.1.1.1130.7	Winner
0	95.5	AVGFLSVPK			0.0009	916.539	2	8	1.1.1.1429.3	Winner
0	95.3	LAALSDHNPSAPR			0.0018	1347.69	3	11	1.1.1.1077.5	Winner
0	95.1	EIIDTANTTEMNSDHHSK			0.0003	2041.9	4	11	1.1.1.1044.10	Winner
0	95.1	EMDKENNDGSSEIGK		missed K-E@4	-0.0035	1651.7	3	11	1.1.1.848.4	Winner
0	94.9	TIHDFFK			-0.0009	906.459	2	9	1.1.1.1306.4	Winner
0	94.8	NQYQALKPR			-0.0004	1116.6	2	10	1.1.1.940.7	Winner
0	94.4	KDLVKNEELEIQEK		missed K-D@1; missed K-N@5	0.0005	1713.92	3	11	1.1.1.1253.7	Winner
0.16	94.2	LLDADGFLNVR		cleaved Q-L@N-term	0.0035	1231.66	2	9	1.1.1.1679.14	Winner
0	94	TMLDDDKR		missed K-R@7	-0.0016	992.458	2	10	1.1.1.840.4	Winner
0	93.9	KKEPSLESGVHSFEEGSELSK		missed K-K@1; missed K-E@2	0.003	2303.13	4	8	1.1.1.1820.7	Winner
0	93.9	SPSPGLFR			-0.0008	859.455	2	10	1.1.1.1211.4	Winner
0	93.8	NPFEAIRPGSAQQVK			0.0006	1640.86	3	11	1.1.1.1261.11	Winner
0	93.5	GTSFFPTAGGFR			0.0006	1243.6	2	9	1.1.1.1617.10	Winner
0	93.2	QLGVDVSIKPR			-0.0027	1210.7	3	7	1.1.1.1364.2	Winner
0	93.2	SPSPGLFR			0.001	859.456	2	10	1.1.1.1205.4	Winner
0	92.4	SSAVGPPEK			0.0005	870.445	2	8	1.1.1.836.2	Winner
0	92.2	KKEPSLESGVHSFEEGSELSK		missed K-K@1; missed K-E@2	-0.0006	2303.13	3	9	1.1.1.1511.9	Winner
0	92.2	KKEPSLESGVHSFEEGSELSK		missed K-K@1; missed K-E@2	-0.0001	2303.13	3	9	1.1.1.1543.11	Winner
0	91.7	SLSSDSTLLLFK			0.0055	1309.72	2	8	1.1.1.1797.17	Winner
0.16	91.2	PFEAIRPGSAQQVK		cleaved N-P@N-term	0.0026	1526.82	3	8	1.1.1.1154.12	Winner
0.32	91	STDFTTDR		cleaved N-S@N-term	-0.001	941.408	2	9	1.1.1.910.4	Winner
0	90.7	KKEPSLESGVHSFEEGSELSK		missed K-K@1; missed K-E@2	-0.001	2303.13	3	10	1.1.1.1591.11	Winner
0	89.6	KKEPSLESGVHSFEEGSELSK		missed K-K@1; missed K-E@2	-0.0001	2303.13	3	10	1.1.1.1612.15	Winner
0	88.9	ESALNLPYHMPENK			-0.0005	1641.78	3	10	1.1.1.1445.5	Winner
0	88.6	MGYFPTEEK			0.0013	1100.49	2	9	1.1.1.1262.13	Winner
0.16	88.3	FEAIRPGSAQQVK		cleaved P-F@N-term	-0.0004	1429.77	3	8	1.1.1.1083.7	Winner
0	88.3	GTSFFPTAGGFR			0.001	1243.6	2	9	1.1.1.1611.11	Winner
0	87.7	TMLDDDKR		missed K-R@7	-0.0016	992.458	2	9	1.1.1.835.2	Winner
0	87.6	KKEPSLESGVHSFEEGSELSK		missed K-K@1; missed K-E@2	0.0025	2303.13	4	10	1.1.1.1851.7	Winner
0	87.6	KKEPSLESGVHSFEEGSELSK		missed K-K@1; missed K-E@2	0.0001	2303.13	4	8	1.1.1.1429.11	Winner
0	87.6	QLGVDVSIKPR			0.0039	1210.71	3	6	1.1.1.1423.2	Winner
0	86.7	SPSPGLFR			0.0008	859.456	2	10	1.1.1.1187.5	Winner
0	84.8	QLGVDVSIKPR			-0.0021	1210.7	3	8	1.1.1.1342.2	Winner
0	83.7	KKEPSLESGVHSFEEGSELSK		missed K-K@1; missed K-E@2	-0.0001	2303.13	3	9	1.1.1.1546.13	Winner
0	81	DMGTDGKEELKADVVPVTLAPK		missed K-E@7; missed K-A@11	0.0031	2312.2	4	8	1.1.1.1541.9	Winner
0.07	80.4	EAIRPGSAQQVK		cleaved F-E@N-term	-0.0001	1282.7	3	9	1.1.1.860.3	Winner
0	79	DMGTDGKEELKADVVPVTLAPK		missed K-E@7; missed K-A@11	-0.0026	2312.19	4	8	1.1.1.1581.9	Winner
0	79	QLGVDVSIKPR			0.0033	1210.71	3	6	1.1.1.1418.2	Winner
0	77.9	DLVKNEELEIQEK		missed K-N@4	0.0011	1585.82	3	6	1.1.1.1422.10	Winner
0	77.9	KKEPSLESGVHSFEEGSELSK		missed K-K@1; missed K-E@2	0.0001	2303.13	3	10	1.1.1.1602.13	Winner
0	76.9	KDLVKNEELEIQEK		missed K-D@1; missed K-N@5	-0.0031	1713.91	3	10	1.1.1.1292.9	Winner
0	76.3	AGQTVNVNVIVK			-0.0045	1240.71	2	8	1.1.1.1390.9	Winner
0.03	75.6	YQALKPR		cleaved Q-Y@N-term	0.0009	874.504	2	8	1.1.1.925.5	Winner
0	74.8	DMGTDGKEELK		missed K-E@7	-0.0006	1221.55	2	8	1.1.1.921.14	Winner
0	74.5	ASLVSSASK			0.0003	848.461	2	8	1.1.1.841.2	Winner
0	73.4	KEPSLESGVHSFEEGSELSK		missed K-E@1	-0.0012	2175.03	3	8	1.1.1.1448.10	Winner
0	73	YLADGDLHSDGPGR			0.0018	1471.67	3	10	1.1.1.1135.6	Winner
0	72.2	QLGVDVSIKPR			0.0039	1210.71	3	6	1.1.1.1392.3	Winner
0	71.1	QLGVDVSIKPR			-0.0021	1210.7	3	8	1.1.1.1347.3	Winner
0	71.1	QLGVDVSIKPR			-0.0027	1210.7	3	8	1.1.1.1335.2	Winner
0	71.1	YLADGDLHSDGPGR			0.0004	1471.67	3	10	1.1.1.1084.9	Winner
0	70.8	AGQTVNVNVIVK			-0.0016	1240.71	2	9	1.1.1.1359.14	Winner
0	69.8	NIDDASQMDLFHR			0.0007	1560.7	3	9	1.1.1.1465.4	Winner
0	69.6	AGQTVNVNVIVK			-0.0016	1240.71	2	9	1.1.1.1325.15	Winner
0	69.6	QLGVDVSIKPR			0.0015	1210.7	3	7	1.1.1.1271.2	Winner
0	68.9	LAALSDHNPSAPR			-0.0015	1347.69	3	8	1.1.1.1121.3	Winner
0	68	NPFEAIRPGSAQQVK			0.001	1640.86	3	10	1.1.1.1292.8	Winner
0.02	65.9	NPFEAIRPG		cleaved G-S@C-term	-0.0006	999.513	2	6	1.1.1.1325.4	Winner
0	65.8	EMDKENNDGSSEIGK		missed K-E@4	-0.0035	1651.7	3	10	1.1.1.843.7	Winner
0	65.8	QLGVDVSIKPR			0.0012	1210.7	3	7	1.1.1.1277.2	Winner
0	63.4	NFVFHTLSPVK			0.001	1287.7	3	7	1.1.1.1467.4	Winner
0	61.2	QLGVDVSIKPR			-0.0024	1210.7	3	7	1.1.1.1352.4	Winner
0	59.7	EIIDTANTTEMNSDHHSK			0.0003	2041.9	4	10	1.1.1.1050.13	Winner
0	59.7	PMVIQESK		cleaved R-P@N-term	0	930.485	2	6	1.1.1.993.5	Winner
0	59.4	LAALSDHNPSAPR			-0.0294	1347.66	3	8	1.1.1.1115.8	Winner
0	59.1	FTSQDASTPASSELNK			0.0012	1681.78	3	8	1.1.1.1130.9	Winner
0	58.1	DMGTDGKEELKADVVPVTLAPK		missed K-E@7; missed K-A@11	-0.0045	2312.19	4	9	1.1.1.1558.4	Winner
0	58	MGYFPTEEKSETDENSGKQPSK		missed K-S@9; missed K-Q@18	-0.0022	2488.1	4	9	1.1.1.1133.10	Winner
0	53	DLVKNEELEIQEK		missed K-N@4	0.0011	1585.82	3	6	1.1.1.1417.12	Winner
0	53	EELKADVVPVTLAPK		missed K-A@4	0	1607.91	3	7	1.1.1.1432.5	Winner
0	53	KEPSLESGVHSFEEGSELSK		missed K-E@1	-0.0022	2175.03	3	7	1.1.1.1434.13	Winner
0	53	KKEPSLESGVHSFEEGSELSK		missed K-K@1; missed K-E@2	0.0025	2303.13	4	9	1.1.1.1845.6	Winner
0	53	KKEPSLESGVHSFEEGSELSK		missed K-K@1; missed K-E@2	0.0014	2303.13	3	9	1.1.1.1709.8	Winner
0	53	KKEPSLESGVHSFEEGSELSK		missed K-K@1; missed K-E@2	0.0001	2303.13	3	8	1.1.1.1606.20	Winner
0	53	QLGVDVSIKPR			0.0042	1210.71	3	6	1.1.1.1516.2	Winner
0	51.7	NFVFHTLSPVK			0.001	1287.7	3	9	1.1.1.1458.2	Winner
0	46	EMDKENNDGSSEIGK		missed K-E@4	-0.0014	1651.7	3	9	1.1.1.838.7	Winner
0	45.9	QLGVDVSIKPR			0.0006	1210.7	3	6	1.1.1.1377.4	Winner
0	45.7	RFTLDR		missed R-F@1	0.0014	806.441	2	8	1.1.1.998.3	Winner
0	45.5	LAALSDHNPSAPR			-0.0279	1347.66	3	8	1.1.1.1104.3	Winner
0	44	STDFTTDR		cleaved N-S@N-term	-0.001	941.408	2	8	1.1.1.905.6	Winner
0	43.6	ADVVPVTLAPK			-0.0017	1108.65	2	6	1.1.1.1385.7	Winner
0	43.3	QLGVDVSIKPR			-0.0024	1210.7	3	6	1.1.1.1359.2	Winner
0	42.6	AGQTVNVNVIVK			-0.0044	1240.71	2	8	1.1.1.1401.8	Winner
0.13	42.3	NPFEAIR		cleaved R-P@C-term	0.001	845.441	2	7	1.1.1.1247.4	Winner
0	40.1	DMGTDGKEELK		missed K-E@7	0.0015	1221.56	3	8	1.1.1.919.3	Winner
0	39.6	KKEPSLESGVHSFEEGSELSK		missed K-K@1; missed K-E@2	0.0001	2303.13	3	8	1.1.1.1622.8	Winner
0	38.7	QLGVDVSIKPR			-0.0021	1210.7	3	6	1.1.1.1384.2	Winner
0	38.4	PMVIQESK		cleaved R-P@N-term	-0.0004	930.484	2	5	1.1.1.999.3	Winner
0	37	RFTLDR		missed R-F@1	0.0011	806.441	2	8	1.1.1.972.3	Winner
0	36.3	MGYFPTEEK			0.0015	1100.49	2	8	1.1.1.1297.5	Winner
0	35.4	KEPSLESGVHSFEEGSELSK		missed K-E@1	-0.0022	2175.03	3	7	1.1.1.1477.7	Winner
0	35.4	RFTLDR		missed R-F@1	0.0014	806.441	2	8	1.1.1.992.3	Winner
0	35.1	YLADGDLHSDGPGR			0.0013	1471.67	3	6	1.1.1.1150.10	Winner
0	34.7	EMDKENNDGSSEIGK		missed K-E@4	-0.0035	1651.7	3	9	1.1.1.853.7	Winner
0.02	34.5	SDHNPSAPR		cleaved L-S@N-term	0.0001	979.447	2	7	1.1.1.1037.6	Winner
0	34	DLVKNEELEIQEK		missed K-N@4	-0.0022	1585.82	3	6	1.1.1.1412.7	Winner
0	33.7	MGYFPTEEK			0.0011	1100.49	2	8	1.1.1.1265.11	Winner
0	33.5	RFTLDR		missed R-F@1	0.0014	806.441	2	8	1.1.1.987.2	Winner
0	33.4	DMGTDGKEELK		missed K-E@7	-0.0819	1221.47	3	10	1.1.1.907.2	Winner
0	31.3	RGPSFMTSPSPK		missed R-G@1	-0.0019	1290.64	2	6	1.1.1.1083.12	Winner
0	31.1	NPFEAIR		cleaved R-P@C-term	0.0008	845.44	2	7	1.1.1.1252.3	Winner
0	30.4	ASLVSSASK			0.0121	848.472	2	6	1.1.1.881.3	Winner
0	30.4	RFTLDR		missed R-F@1	0.0014	806.441	2	8	1.1.1.977.3	Winner
0	30.4	RFTLDR		missed R-F@1	0.0014	806.441	2	8	1.1.1.982.2	Winner
0	30.4	RFTLDR		missed R-F@1	0.0011	806.441	2	7	1.1.1.1004.3	Winner
0	30.3	KKEPSLESGVHSFEEGSELSK		missed K-K@1; missed K-E@2	-0.001	2303.13	3	8	1.1.1.1588.12	Winner
0	29.9	MGYFPTEEK			-0.0004	1100.48	2	6	1.1.1.1267.11	Winner
0	29.8	AVGFLSVPK			0.0005	916.539	2	6	1.1.1.1511.3	Winner
0	29.2	QLGVDVSIKPR			-0.0264	1210.68	3	7	1.1.1.1328.2	Winner
0	29.2	QLGVDVSIKPR			0.0018	1210.71	3	6	1.1.1.1289.2	Winner
0	28.8	DMGTDGKEELKADVVPVTLAPK		missed K-E@7; missed K-A@11	0.0014	2312.2	4	9	1.1.1.1598.8	Winner
0	28.5	RFTLDR		missed R-F@1	0.0009	806.441	2	5	1.1.1.967.2	Winner
0	28.3	KKEPSLESGVHSFEEGSELSK		missed K-K@1; missed K-E@2	-0.0043	2303.12	4	9	1.1.1.1447.5	Winner
0	27.1	PFEAIRPGSAQQVK		cleaved N-P@N-term	0.0026	1526.82	3	9	1.1.1.1149.9	Winner
0	27	NPFEAIR		cleaved R-P@C-term	0.0008	845.44	2	5	1.1.1.1233.3	Winner
0	24.8	NPFEAIR		cleaved R-P@C-term	0.001	845.441	2	6	1.1.1.1242.3	Winner
0	24.4	KKEPSLESGVHSFEEGSELSK		missed K-K@1; missed K-E@2	-0.0039	2303.12	3	7	1.1.1.1506.12	Winner
0	22	ASTPASSELNK		cleaved D-A@N-term	-0.0018	1103.54	2	7	1.1.1.884.6	Winner
0	21.7	AVGFLSVPK			0.0005	916.539	2	6	1.1.1.1516.3	Winner
0	20.1	KKEPSLESGVHSFEEGSELSK		missed K-K@1; missed K-E@2	-0.0037	2303.12	3	8	1.1.1.1537.14	Winner
0	17.3	QLGVDVSIKPR			0.0033	1210.71	3	5	1.1.1.1469.2	Winner
0	17.1	KKEPSLESGVHSFEEGSELSK		missed K-K@1; missed K-E@2	-0.0004	2303.13	3	6	1.1.1.1494.10	Winner
0	17.1	YLADGDLHSDGPGR			0.0004	1471.67	3	7	1.1.1.1074.8	Winner
0	17	ESALNLPYHMPENK			0	1641.78	3	6	1.1.1.1413.7	Winner
0	16.9	ASLVSSASK			0.011	848.471	2	5	1.1.1.872.2	Winner
0	16	KKEPSLESGVHSFEEGSELSK		missed K-K@1; missed K-E@2	-0.001	2303.13	3	7	1.1.1.1582.16	Winner
0	15.8	KKEPSLESGVHSFEEGSELSK		missed K-K@1; missed K-E@2	0.0032	2303.13	4	6	1.1.1.1830.9	Winner
0	15.1	KKEPSLESGVHSFEEGSELSK		missed K-K@1; missed K-E@2	0.0005	2303.13	3	6	1.1.1.1635.17	Winner
0	14.9	IHDFFK		cleaved T-I@N-term	0.0018	805.414	2	6	1.1.1.1257.2	Winner
0	14.8	DLVKNEELEIQEK		missed K-N@4	-0.0022	1585.82	3	5	1.1.1.1428.6	Winner
0	14.1	DMGTDGKEELKADVVPVTLAPK		missed K-E@7; missed K-A@11	0.0043	2312.2	4	8	1.1.1.1609.8	Winner
0	13.3	KEPSLESGVHSFEEGSELSK		missed K-E@1	-0.0022	2175.03	3	6	1.1.1.1462.10	Winner
0	12.9	LAALSDHN		cleaved N-P@C-term	0.0006	839.414	2	7	1.1.1.930.2	Winner
0	12.9	PFEAIRPGSAQQVK		cleaved N-P@N-term	0.0026	1526.82	3	8	1.1.1.1144.6	Winner
0	12.7	SPSPGLFR			0.0044	859.46	2	6	1.1.1.1270.4	Winner
0	12.4	NASRPMVIQESK			-0.0003	1358.7	3	7	1.1.1.968.4	Winner
0	11.8	KKEPSLESGVHSFEEGSELSK		missed K-K@1; missed K-E@2	0.003	2303.13	4	6	1.1.1.1825.11	Winner
0	11.8	KKEPSLESGVHSFEEGSELSK		missed K-K@1; missed K-E@2	0.001	2303.13	3	6	1.1.1.1685.17	Winner
0	10.9	YQALKPR		cleaved Q-Y@N-term	0.0009	874.504	2	7	1.1.1.930.4	Winner
0	9	NASRPMVIQESK			-0.0003	1358.7	3	6	1.1.1.941.4	Winner
0	7	FEAIRPGSAQQVK		cleaved P-F@N-term	-0.0004	1429.77	3	7	1.1.1.1089.11	Winner
0	7	QLGVDVSIKPR			-0.0546	1210.65	3	7	1.1.1.1292.2	Winner
0	0.2	DMGTDGKEELKADVVPVTLAPK		missed K-E@7; missed K-A@11	-0.0134	2312.18	4	6	1.1.1.2632.6	Winner
0	0.2	KKEPSLESGVHSFEEGSELSK		missed K-K@1; missed K-E@2	-0.0133	2303.11	4	5	1.1.1.2632.5	Winner

## Sheet: HU sicdc7
Contrib	Conf	Sequence	Modifications	Cleavages	∆Mass	Prec MW	z	Sc	Spectrum	Type
0	18	FTSQAEKHLPR	Acetyl(K)@7	missed K-H@7	0.0004	1354.7	3	10	1.1.1.1137.6	Winner
0	99	MGYFPTEEK	Acetyl@N-term		-0.001	1142.49	2	9	1.1.1.1312.15	Winner
0	99	NQEDDVEQPFNDSG	Amidated@C-term	cleaved G-C@C-term	0.0012	1591.64	2	17	1.1.1.1278.19	Winner
0	99	NQEDDVEQPFNDSG	Amidated@C-term	cleaved G-C@C-term	0.0012	1591.64	2	16	1.1.1.1283.21	Winner
2	99	NQEDDVEQPFNDSG	Amidated@C-term	cleaved G-C@C-term	0.0012	1591.64	2	19	1.1.1.1273.16	Winner
0.01	99	SLYQENLEAQVKP	Amidated@C-term	cleaved P-C@C-term	0.0013	1516.79	2	16	1.1.1.1379.17	Winner
0	99	SLYQENLEAQVKP	Amidated@C-term	cleaved P-C@C-term	0.0013	1516.79	2	18	1.1.1.1374.16	Winner
0	98.9	SLYQENLEAQVKP	Amidated@C-term	cleaved P-C@C-term	0.0013	1516.79	2	17	1.1.1.1369.16	Winner
0	96.4	LEGEGPQNPEETDEKVEEPEQQNK	Carbamyl@N-term; Deamidated(N)@8; Phospho(T)@12	cleaved A-L@N-term; missed K-V@15	-0.0035	2876.18	4	13	1.1.1.1170.13	Winner
0	99	SETDENSGKQPSKLDEDDSCSLLTK	Carboxy(D)@18; Dioxidation(C)@20	missed K-Q@9; missed K-L@13	0.016	2801.22	4	15	1.1.1.1314.16	Winner
0	5.6	SETDENSGKQPSKLDEDDSCSLLTK	Carboxy(D)@18; Dioxidation(C)@20	missed K-Q@9; missed K-L@13	0.016	2801.22	4	12	1.1.1.1324.16	Winner
0	91.1	LDEDDSCSLLTK	Carboxy(D)@5; Dioxidation(C)@7		0.0188	1413.6	2	14	1.1.1.1435.10	Winner
0	99	ETQIITGSDESCR	Carboxy(E)@10; Dioxidation(C)@12		0.0187	1513.64	2	14	1.1.1.1178.18	Winner
0	87.6	LSEPSLPIEDSQDLYNASPEPK	Carboxy(E)@9		-0.0272	2472.13	3	13	1.1.1.1682.10	Winner
0	97.1	LSEPSLPIEDSQDLYNASPEPK	Cation:K(D)@13		-0.0094	2466.11	4	14	1.1.1.1680.6	Winner
0	95.2	LSEPSLPIEDSQDLYNASPEPK	Cation:K(D)@13		-0.0102	2466.11	3	13	1.1.1.1682.9	Winner
0	89.2	LSEPSLPIEDSQDLYNASPEPK	Cation:K(D)@13		-0.0102	2466.11	3	12	1.1.1.1681.11	Winner
0	42.1	LSEPSLPIEDSQDLYNASPEPK	Cation:K(D)@13		-0.0102	2466.11	3	9	1.1.1.1688.7	Winner
0	18.2	LSEPSLPIEDSQDLYNASPEPK	Cation:K(D)@13		-0.0094	2466.11	4	8	1.1.1.1691.5	Winner
0	64.5	ADVVPVTLAPK	Cation:K(D)@2		0.0008	1146.61	2	9	1.1.1.1389.10	Winner
0	99	GSEQTTGAENEVETNALPVVSK	Cation:K(E)@11		-0.0104	2297.03	3	22	1.1.1.1431.9	Winner
0	98.9	GSEQTTGAENEVETNALPVVSK	Cation:K(E)@11		-0.0104	2297.03	3	18	1.1.1.1430.10	Winner
0	91.4	GSEQTTGAENEVETNALPVVSK	Cation:K(E)@11		-0.0104	2297.03	3	13	1.1.1.1428.16	Winner
0	85.7	ITAEEEEEIGEDSQFMILAK	Cation:K(E)@11; Oxidation(D)@12; Deamidated(Q)@14; Oxidation(M)@16		-0.0195	2351.98	4	12	1.1.1.1715.5	Winner
0	87.6	ITAEEEEEIGEDSQFMILAK	Cation:K(E)@11; Oxidation(D)@12; Oxidation(M)@16		-0.0361	2350.98	4	14	1.1.1.1729.4	Winner
0	87.6	ITAEEEEEIGEDSQFMILAK	Cation:K(E)@11; Oxidation(D)@12; Oxidation(M)@16		-0.03	2350.98	4	14	1.1.1.2980.3	Winner
0	88.4	ITAEEEEEIGEDSQFMILAK	Cation:K(E)@11; Phospho(S)@13; Dethiomethyl(M)@16		0.0027	2350.99	4	14	1.1.1.1805.4	Winner
0	66.6	ITAEEEEEIGEDSQFMILAK	Cation:K(E)@11; Phospho(S)@13; Dethiomethyl(M)@16		-0.0029	2350.98	4	12	1.1.1.1793.3	Winner
0	88.4	LGADEDSFVILEPETNR	Cation:K(E)@12		-0.0105	1941.86	3	12	1.1.1.1715.7	Winner
0	99	LGADEDSFVILEPETNR	Cation:K(E)@5		-0.0105	1941.86	3	18	1.1.1.1710.7	Winner
0	88.4	LGADEDSFVILEPETNR	Cation:K(E)@5		-0.0099	1941.86	3	11	1.1.1.1705.9	Winner
0	98.5	LSEPSLPIEDSQDLYNASPEPK	Cation:K(E)@9		-0.0102	2466.11	3	17	1.1.1.1684.15	Winner
0	97.7	LSEPSLPIEDSQDLYNASPEPK	Cation:K(E)@9		-0.0102	2466.11	3	16	1.1.1.1690.11	Winner
0	97.1	GSEQTTGAENEVETNALPVVSK	Cation:K(E)@9		-0.0104	2297.03	3	14	1.1.1.1429.9	Winner
0	96.1	GSEQTTGAENEVETNALPVVSK	Cation:K(E)@9		-0.0109	2297.03	4	15	1.1.1.1427.9	Winner
0	93.2	GSEQTTGAENEVETNALPVVSK	Cation:K(E)@9		-0.0109	2297.03	4	14	1.1.1.1433.6	Winner
0	89.2	LSEPSLPIEDSQDLYNASPEPK	Cation:K(E)@9		-0.0094	2466.11	4	13	1.1.1.1685.5	Winner
0	87.6	GSEQTTGAENEVETNALPVVSK	Cation:K(E)@9; Oxidation(N)@10		-0.038	2313	3	14	1.1.1.1436.16	Winner
0	96.1	GSEQTTGAENEVETNALPVVSK	Cation:K(E)@9; Oxidation(N)@10; Deamidated(N)@15		-0.0352	2313.99	3	17	1.1.1.1469.4	Winner
0	99	LSEPSLPIEDSQDLYNASPEPK	Cation:Na(D)@10		-0.0021	2450.14	3	23	1.1.1.1680.17	Winner
0	99	LSEPSLPIEDSQDLYNASPEPK	Cation:Na(D)@10		-0.0021	2450.14	3	25	1.1.1.1685.13	Winner
0	98.3	LSEPSLPIEDSQDLYNASPEPK	Cation:Na(D)@10		-0.005	2450.14	3	17	1.1.1.1696.7	Winner
0	99	LSEPSLPIEDSQDLYNASPEPK	Cation:Na(D)@13		-0.0021	2450.14	3	25	1.1.1.1691.11	Winner
0	88.4	LSEPSLPIEDSQDLYNASPEPK	Cation:Na(D)@13		-0.0021	2450.14	3	12	1.1.1.1675.17	Winner
0	98.7	LSEPSLPIEDSQDLYNASPEPK	Cation:Na(D)@13; Deamidated(N)@16		0.0119	2451.14	3	17	1.1.1.1664.10	Winner
0	92.1	SLSSDSTLLLFK	Cation:Na(D)@5		-0.0006	1331.69	2	14	1.1.1.1769.6	Winner
0	89.2	SLSSDSTLLLFK	Cation:Na(D)@5		-0.0008	1331.69	2	13	1.1.1.1763.4	Winner
0	86.7	SLSSDSTLLLFK	Cation:Na(D)@5		-0.0008	1331.69	2	12	1.1.1.1757.4	Winner
0	64.5	SLSSDSTLLLFK	Cation:Na(D)@5		-0.001	1331.69	2	9	1.1.1.1776.9	Winner
0.28	99	LAALSDHNPSAPR	Cation:Na(D)@6		0.0022	1369.67	3	14	1.1.1.1058.8	Winner
0	99	LGADEDSFVILEPETNR	Cation:Na(D)@6		-0.002	1925.9	3	17	1.1.1.1734.4	Winner
0	99	LGADEDSFVILEPETNR	Cation:Na(D)@6		-0.0019	1925.9	3	19	1.1.1.1729.6	Winner
0	99	LGADEDSFVILEPETNR	Cation:Na(D)@6		-0.0015	1925.9	3	24	1.1.1.1714.6	Winner
0	99	LGADEDSFVILEPETNR	Cation:Na(D)@6		-0.0015	1925.9	3	24	1.1.1.1709.5	Winner
0	99	LGADEDSFVILEPETNR	Cation:Na(D)@6		-0.0015	1925.9	3	25	1.1.1.1704.2	Winner
0	28	YLADGDLHSDGPGR	Cation:Na(D)@6		-0.0003	1493.65	3	11	1.1.1.1114.5	Winner
0	99	GSEQTTGAENEVETNALPVVSK	Cation:Na(E)@11		-0.0048	2281.06	3	24	1.1.1.1436.13	Winner
0	97.1	ITAEEEEEIGEDSQFMILAK	Cation:Na(E)@11		-0.0015	2303.05	3	14	1.1.1.1859.5	Winner
0	97.7	GSEQTTGAENEVETNALPVVSK	Cation:Na(E)@11; Deamidated(N)@15		0.0022	2282.05	3	14	1.1.1.1392.14	Winner
0	93.2	GSEQTTGAENEVETNALPVVSK	Cation:Na(E)@11; Deamidated(N)@15		0.0022	2282.05	3	13	1.1.1.1385.17	Winner
0	99	LGADEDSFVILEPETNR	Cation:Na(E)@5		-0.002	1925.9	3	20	1.1.1.1724.5	Winner
0	99	LGADEDSFVILEPETNR	Cation:Na(E)@5		-0.0015	1925.9	3	24	1.1.1.1719.5	Winner
0	98.9	LGADEDSFVILEPETNR	Cation:Na(E)@5		-0.0019	1925.9	3	18	1.1.1.1699.5	Winner
0	88.4	LGADEDSFVILEPETNR	Cation:Na(E)@5		-0.0019	1925.9	2	9	1.1.1.1708.15	Winner
0	85.7	LGADEDSFVILEPETNR	Cation:Na(E)@5		-0.0019	1925.9	2	9	1.1.1.1715.16	Winner
0	99	ITAEEEEEIGEDSQFMILAK	Cation:Na(E)@6		-0.0015	2303.05	3	18	1.1.1.1864.5	Winner
0	71.4	RLGADEDSFVILEPETNR	Cation:Na(E)@6	cleaved P-R@N-term; missed R-L@1	0.0005	2082	2	10	1.1.1.1726.8	Winner
0	99	ITAEEEEEIGEDSQFMILAK	Cation:Na(E)@8		-0.0017	2303.05	3	19	1.1.1.2480.2	Winner
0	98.9	ITAEEEEEIGEDSQFMILAK	Cation:Na(E)@8; Oxidation(M)@16		0.0033	2319.05	3	18	1.1.1.2478.3	Winner
0	42.1	ITAEEEEEIGEDSQFMILAK	Cation:Na(E)@8; Oxidation(M)@16		-0.0013	2319.04	3	8	1.1.1.1719.13	Winner
0	99	GSEQTTGAENEVETNALPVVSK	Cation:Na(E)@9		-0.0048	2281.06	3	26	1.1.1.1425.16	Winner
0	99	GSEQTTGAENEVETNALPVVSK	Cation:Na(E)@9		-0.0052	2281.06	3	20	1.1.1.1420.14	Winner
0	99	GSEQTTGAENEVETNALPVVSK	Cation:Na(E)@9		-0.0048	2281.06	3	30	1.1.1.1430.9	Winner
0	92.1	LSEPSLPIEDSQDLYNASPEPK	Cation:Na(E)@9; Deamidated(N)@16		0.0011	2451.13	3	13	1.1.1.1702.8	Winner
0	99	ESALNLPYHMPENK	Chloro(Y)@8		0.0078	1675.75	2	14	1.1.1.1338.13	Winner
0	91.1	ESALNLPYHMPENK	Chloro(Y)@8		0.0078	1675.75	2	10	1.1.1.1343.21	Winner
0	99	CLEDDTQSQLLDADGFLNVR	Cyano(C)@1	cleaved F-C@N-term	0.004	2276.04	3	26	1.1.1.1904.5	Winner
0	99	CLEDDTQSQLLDADGFLNVR	Cyano(C)@1	cleaved F-C@N-term	0.004	2276.04	3	26	1.1.1.1899.5	Winner
2	99	CLEDDTQSQLLDADGFLNVR	Cyano(C)@1	cleaved F-C@N-term	0.004	2276.04	3	26	1.1.1.1909.6	Winner
0	99	CLEDDTQSQLLDADGFLNVR	Cyano(C)@1	cleaved F-C@N-term	0.004	2276.04	3	26	1.1.1.1894.5	Winner
0	99	ENMEELLNLCSGK	Cys->Dha(C)@10		0.0005	1444.69	2	17	1.1.1.1767.3	Winner
0	98.9	ENMEELLNLCSGK	Cys->Dha(C)@10		0.0003	1444.69	2	16	1.1.1.1758.5	Winner
0	98.5	ENMEELLNLCSGK	Cys->Dha(C)@10		-0.0006	1444.69	2	15	1.1.1.1723.9	Winner
0	98.3	ENMEELLNLCSGK	Cys->Dha(C)@10		-0.0006	1444.69	2	15	1.1.1.1728.7	Winner
0	98	ENMEELLNLCSGK	Cys->Dha(C)@10		-0.0011	1444.69	2	15	1.1.1.1753.4	Winner
0	97.7	ENMEELLNLCSGK	Cys->Dha(C)@10		-0.0006	1444.69	2	12	1.1.1.1738.7	Winner
0	97.7	ENMEELLNLCSGK	Cys->Dha(C)@10		-0.0006	1444.69	2	14	1.1.1.1733.8	Winner
0	90.7	ENMEELLNLCSGK	Cys->Dha(C)@10		0	1444.69	2	11	1.1.1.1743.7	Winner
0	90	ENMEELLNLCSGK	Cys->Dha(C)@10		-0.0003	1444.69	2	10	1.1.1.1718.8	Winner
0	90	ENMEELLNLCSGK	Cys->Dha(C)@10		-0.0003	1444.69	2	9	1.1.1.1701.11	Winner
0	89.2	ENMEELLNLCSGK	Cys->Dha(C)@10; Dehydrated(S)@11; Dioxidation(K)@13		-0.0164	1458.65	2	12	1.1.1.1807.5	Winner
0	93.8	QPSKLDEDDSCSLLTK	Cys->Dha(C)@11	missed K-L@4	0.003	1743.86	3	10	1.1.1.1262.16	Winner
0	87.6	KENMEELLNLCSGK	Cys->Dha(C)@11	missed K-E@1	0.0005	1572.78	3	9	1.1.1.1565.4	Winner
0	68.6	KENMEELLNLCSGK	Cys->Dha(C)@11	missed K-E@1	0.0005	1572.78	3	8	1.1.1.1560.5	Winner
0	68	QPSKLDEDDSCSLLTK	Cys->Dha(C)@11	missed K-L@4	0.003	1743.86	3	10	1.1.1.1272.12	Winner
0	51.5	QPSKLDEDDSCSLLTK	Cys->Dha(C)@11	missed K-L@4	0.003	1743.86	3	9	1.1.1.1267.11	Winner
0	99	ETQIITGSDESCR	Cys->Dha(C)@12		0.0007	1403.65	2	16	1.1.1.1080.20	Winner
2	99	ETQIITGSDESCR	Cys->Dha(C)@12		0.0004	1403.65	2	21	1.1.1.1069.18	Winner
0	99	ETQIITGSDESCR	Cys->Dha(C)@12		0.0004	1403.65	2	20	1.1.1.1075.18	Winner
0	99	ETQIITGSDESCR	Cys->Dha(C)@12		0.0004	1403.65	2	18	1.1.1.1063.16	Winner
0	99	ETQIITGSDESCR	Cys->Dha(C)@12		0.0008	1403.65	2	8	1.1.1.1085.19	Winner
0	99	ETQIITGSDESCRK	Cys->Dha(C)@12	missed R-K@13	-0.0026	1531.75	3	14	1.1.1.977.11	Winner
0	99	ETQIITGSDESCRK	Cys->Dha(C)@12	missed R-K@13	-0.0018	1531.75	3	8	1.1.1.987.12	Winner
0	99	ETQIITGSDESCRK	Cys->Dha(C)@12	missed R-K@13	-0.0026	1531.75	3	12	1.1.1.975.9	Winner
0	99	ETQIITGSDESCRK	Cys->Dha(C)@12	missed R-K@13	-0.0026	1531.75	3	11	1.1.1.982.12	Winner
2	99	ETQIITGSDESCRK	Cys->Dha(C)@12	missed R-K@13	-0.0026	1531.75	3	16	1.1.1.971.6	Winner
0	98.7	NQEDDVEQPFNDSGCLLVDK	Cys->Dha(C)@15		-0.0009	2230	3	14	1.1.1.1669.13	Winner
0	99	SETDENSGKQPSKLDEDDSCSLLTK	Cys->Dha(C)@20	missed K-Q@9; missed K-L@13	0.0015	2691.24	4	9	1.1.1.1285.18	Winner
2	99	SETDENSGKQPSKLDEDDSCSLLTK	Cys->Dha(C)@20	missed K-Q@9; missed K-L@13	0.0015	2691.24	4	12	1.1.1.1223.14	Winner
0	99	SETDENSGKQPSKLDEDDSCSLLTK	Cys->Dha(C)@20	missed K-Q@9; missed K-L@13	0.0015	2691.24	4	13	1.1.1.1229.12	Winner
0	75.7	PTCHGNAMALLK	Cys->Dha(C)@3; Oxidation(M)@8	cleaved R-P@N-term	0.0004	1236.63	3	9	1.1.1.1005.4	Winner
0	51.5	PTCHGNAMALLK	Cys->Dha(C)@3; Oxidation(M)@8	cleaved R-P@N-term	0.0004	1236.63	3	8	1.1.1.1011.2	Winner
0	99	LDEDDSCSLLTK	Cys->Dha(C)@7		0.0012	1303.62	2	11	1.1.1.1319.15	Winner
0	99	LDEDDSCSLLTK	Cys->Dha(C)@7		0.0012	1303.62	2	16	1.1.1.1309.19	Winner
2	99	LDEDDSCSLLTK	Cys->Dha(C)@7		0.0012	1303.62	2	14	1.1.1.1314.13	Winner
0	99	LDEDDSCSLLTK	Cys->Dha(C)@7		0.0012	1303.62	2	10	1.1.1.1303.19	Winner
0	99	LDEDDSCSLLTK	Cys->Dha(C)@7		0.0012	1303.62	2	11	1.1.1.1313.17	Winner
0	85.7	LDEDDSCSLLTK	Cys->Dha(C)@7		-0.0009	1303.61	2	8	1.1.1.1384.15	Winner
0	85.7	LDEDDSCSLLTK	Cys->Dha(C)@7		-0.0009	1303.61	2	8	1.1.1.1389.16	Winner
0	3.4	LDEDDSCSLLTK	Cys->Dha(C)@7		-0.0009	1303.61	2	6	1.1.1.1395.14	Winner
0	99	NASRPMVIQESK	Deamidated(N)@1		-0.0007	1359.68	3	13	1.1.1.1039.8	Winner
0	99	NASRPMVIQESK	Deamidated(N)@1		0.002	1359.68	3	14	1.1.1.1081.5	Winner
0	99	NASRPMVIQESK	Deamidated(N)@1		0.002	1359.68	3	13	1.1.1.1086.6	Winner
0	99	NASRPMVIQESK	Deamidated(N)@1		0.0017	1359.68	3	18	1.1.1.1076.3	Winner
0	99	NFVFHTLSPVK	Deamidated(N)@1		-0.0017	1288.68	2	10	1.1.1.1622.10	Winner
0	99	NFVFHTLSPVK	Deamidated(N)@1		-0.0017	1288.68	2	11	1.1.1.1616.12	Winner
0	99	NQYQALKPR	Deamidated(N)@1		0.001	1117.59	2	13	1.1.1.1061.15	Winner
0	99	NQYQALKPR	Deamidated(N)@1		-0.0016	1117.59	2	12	1.1.1.1010.15	Winner
0	99	NQYQALKPR	Deamidated(N)@1		-0.0016	1117.59	2	12	1.1.1.999.13	Winner
0	99	NQYQALKPR	Deamidated(N)@1		0.001	1117.59	2	14	1.1.1.1055.12	Winner
0	98.7	NQYQALKPR	Deamidated(N)@1		-0.0016	1117.59	2	11	1.1.1.1004.11	Winner
0	98.5	NEELEIQEK	Deamidated(N)@1		0.019	1131.55	2	13	1.1.1.1097.13	Winner
0	97.9	NEELEIQEK	Deamidated(N)@1		0.0187	1131.55	2	12	1.1.1.1090.13	Winner
0	97.7	NQYQALKPR	Deamidated(N)@1		0.001	1117.59	2	9	1.1.1.1067.18	Winner
0	94.4	NEELEIQEK	Deamidated(N)@1		0.0115	1131.54	2	11	1.1.1.1183.4	Winner
0	92.5	NASRPMVIQESK	Deamidated(N)@1		-0.0007	1359.68	3	10	1.1.1.1044.7	Winner
0	85.8	NASRPMVIQESK	Deamidated(N)@1		0.0017	1359.68	3	9	1.1.1.1070.4	Winner
0	83	NASRPMVIQESK	Deamidated(N)@1		-0.0007	1359.68	3	7	1.1.1.1033.7	Winner
0	78.5	NQYQALKPR	Deamidated(N)@1		-0.0015	1117.59	2	10	1.1.1.984.14	Winner
0	68.9	NFVFHTLSPVK	Deamidated(N)@1		-0.0008	1288.68	3	7	1.1.1.1564.3	Winner
0	28.6	NQYQALKPR	Deamidated(N)@1		0.001	1117.59	2	6	1.1.1.1050.13	Winner
0	22.1	NFVFHTLSPVK	Deamidated(N)@1		-0.0017	1288.68	2	7	1.1.1.1627.10	Winner
0	15.2	NFVFHTLSPVK	Deamidated(N)@1		-0.0008	1288.68	3	7	1.1.1.1571.2	Winner
0	12.4	NASRPMVIQESK	Deamidated(N)@1		-0.0007	1359.68	3	6	1.1.1.1049.6	Winner
0	21.7	NEELEIQEK	Deamidated(N)@1; Deamidated(Q)@7		0.036	1132.55	2	8	1.1.1.1085.13	Winner
0	99	NASRPMVIQESK	Deamidated(N)@1; Deamidated(R)@4; Oxidation(P)@5; Oxidation(M)@6		0.0079	1392.66	2	12	1.1.1.981.12	Winner
0.12	99	NASRPMVIQESK	Deamidated(N)@1; Deamidated(R)@4; Oxidation(P)@5; Oxidation(M)@6		0.0079	1392.66	2	11	1.1.1.986.14	Winner
0	99	NASRPMVIQESK	Deamidated(N)@1; Oxidation(M)@6		-0.0006	1375.68	3	13	1.1.1.989.6	Winner
0	99	NASRPMVIQESK	Deamidated(N)@1; Oxidation(M)@6		-0.0038	1375.67	2	14	1.1.1.973.6	Winner
0	99	NASRPMVIQESK	Deamidated(N)@1; Oxidation(M)@6		0.0001	1375.68	3	15	1.1.1.952.8	Winner
0	99	NASRPMVIQESK	Deamidated(N)@1; Oxidation(M)@6		0.0001	1375.68	3	14	1.1.1.957.5	Winner
0	99	NASRPMVIQESK	Deamidated(N)@1; Oxidation(M)@6		-0.0006	1375.68	3	16	1.1.1.979.5	Winner
0	99	NASRPMVIQESK	Deamidated(N)@1; Oxidation(M)@6		-0.0006	1375.68	3	14	1.1.1.984.7	Winner
0	98.9	NASRPMVIQESK	Deamidated(N)@1; Oxidation(M)@6		0.0001	1375.68	3	13	1.1.1.947.7	Winner
0	94.8	NASRPMVIQESK	Deamidated(N)@1; Oxidation(M)@6		-0.0011	1375.68	3	10	1.1.1.995.5	Winner
0	60	NASRPMVIQESK	Deamidated(N)@1; Oxidation(M)@6		0.0001	1375.68	3	10	1.1.1.950.6	Winner
0	99	NASRPMVIQESK	Deamidated(N)@1; Oxidation(M)@6; Deamidated(Q)@9		0.0015	1376.66	3	11	1.1.1.1008.2	Winner
0	99	NFVFHTLSPVK	Deamidated(N)@1; Phospho(S)@8		0.003	1368.65	2	16	1.1.1.1773.3	Winner
0	99	NFVFHTLSPVK	Deamidated(N)@1; Phospho(S)@8		-0.0036	1368.64	2	13	1.1.1.1757.7	Winner
0	99	NFVFHTLSPVK	Deamidated(N)@1; Phospho(S)@8		0.0026	1368.65	2	14	1.1.1.1763.6	Winner
0	99	NFVFHTLSPVKAEAAK	Deamidated(N)@1; Phospho(S)@8	missed K-A@11	0.0006	1838.9	3	16	1.1.1.1634.8	Winner
0	99	NFVFHTLSPVKAEAAK	Deamidated(N)@1; Phospho(S)@8	missed K-A@11	0.0008	1838.9	3	17	1.1.1.1587.6	Winner
0	99	NFVFHTLSPVKAEAAK	Deamidated(N)@1; Phospho(S)@8	missed K-A@11	0.0006	1838.9	3	14	1.1.1.1630.8	Winner
0	99	NFVFHTLSPVKAEAAK	Deamidated(N)@1; Phospho(S)@8	missed K-A@11	0.0006	1838.9	3	22	1.1.1.1639.6	Winner
0	99	NFVFHTLSPVKAEAAK	Deamidated(N)@1; Phospho(S)@8	missed K-A@11	0.0021	1838.9	3	20	1.1.1.1656.7	Winner
0	99	NFVFHTLSPVKAEAAK	Deamidated(N)@1; Phospho(S)@8	missed K-A@11	0.0017	1838.9	3	13	1.1.1.1666.5	Winner
0	99	NFVFHTLSPVKAEAAK	Deamidated(N)@1; Phospho(S)@8	missed K-A@11	0.0016	1838.9	3	20	1.1.1.1644.5	Winner
0	93.2	NFVFHTLSPVKAEAAK	Deamidated(N)@1; Phospho(S)@8	missed K-A@11	0.0027	1838.9	3	14	1.1.1.1607.9	Winner
0	83.4	NFVFHTLSPVKAEAAK	Deamidated(N)@1; Phospho(S)@8	missed K-A@11	0.0008	1838.9	3	11	1.1.1.1592.12	Winner
0	75.4	NFVFHTLSPVK	Deamidated(N)@1; Phospho(S)@8		-0.0074	1368.64	3	9	1.1.1.1750.4	Winner
0	47.4	NFVFHTLSPVK	Deamidated(N)@1; Phospho(S)@8		0.0018	1368.65	3	10	1.1.1.1783.2	Winner
0	99	NFVFHTLSPVKAEAAK	Deamidated(N)@1; Phospho(T)@6	missed K-A@11	0.0012	1838.9	3	16	1.1.1.1661.3	Winner
0	99	GSEQTTGAENEVETNALPVVSK	Deamidated(N)@10		0.0039	2260.08	2	18	1.1.1.1380.18	Winner
0	99	GSEQTTGAENEVETNALPVVSK	Deamidated(N)@10		0.0007	2260.07	3	31	1.1.1.1373.14	Winner
0	99	GSEQTTGAENEVETNALPVVSK	Deamidated(N)@10		0.0007	2260.07	3	26	1.1.1.1368.14	Winner
0	99	GSEQTTGAENEVETNALPVVSK	Deamidated(N)@10		0.0007	2260.07	2	18	1.1.1.1375.17	Winner
0	99	GSEQTTGAENEVETNALPVVSK	Deamidated(N)@10		0.0007	2260.07	3	33	1.1.1.1378.13	Winner
0	99	GSEQTTGAENEVETNALPVVSK	Deamidated(N)@10		0.0012	2260.07	3	27	1.1.1.1451.14	Winner
0	99	GSEQTTGAENEVETNALPVVSK	Deamidated(N)@10		0.0007	2260.07	2	21	1.1.1.1374.20	Winner
0	99	GSEQTTGAENEVETNALPVVSK	Deamidated(N)@10		0.0007	2260.07	2	24	1.1.1.1376.17	Winner
0	99	GSEQTTGAENEVETNALPVVSK	Deamidated(N)@10		0.0007	2260.07	2	12	1.1.1.1379.21	Winner
0	99	GSEQTTGAENEVETNALPVVSK	Deamidated(N)@10		0.0007	2260.07	2	19	1.1.1.1377.14	Winner
0	97.4	GSEQTTGAENEVETNALPVVSK	Deamidated(N)@10; Cation:Na(E)@11		-0.0013	2282.05	3	14	1.1.1.1448.17	Winner
0	99	EIIDTANTTEMNSDHHSK	Deamidated(N)@12		0.0045	2042.89	3	17	1.1.1.1087.19	Winner
0	99	EIIDTANTTEMNSDHHSK	Deamidated(N)@12		0.0045	2042.89	3	16	1.1.1.1083.16	Winner
0	99	EIIDTANTTEMNSDHHSK	Deamidated(N)@12		0.0008	2042.89	3	14	1.1.1.1096.15	Winner
0	98.5	EIIDTANTTEMNSDHHSK	Deamidated(N)@12		0.0045	2042.89	4	13	1.1.1.1087.13	Winner
0	95.1	EIIDTANTTEMNSDHHSK	Deamidated(N)@12		0.0045	2042.89	4	12	1.1.1.1082.13	Winner
0	95.1	EIIDTANTTEMNSDHHSK	Deamidated(N)@12		0.0045	2042.89	4	12	1.1.1.1092.10	Winner
0	84	EIIDTANTTEMNSDHHSK	Deamidated(N)@12		0.001	2042.89	4	11	1.1.1.1106.12	Winner
0	99	FTSQDASTPASSELNKQEK	Deamidated(N)@15	missed K-Q@16	0.0018	2067.96	3	19	1.1.1.1132.17	Winner
0	99	FTSQDASTPASSELNKQEK	Deamidated(N)@15	missed K-Q@16	0.0018	2067.96	3	18	1.1.1.1082.20	Winner
0	99	FTSQDASTPASSELNKQEK	Deamidated(N)@15	missed K-Q@16	0.0018	2067.96	3	21	1.1.1.1077.17	Winner
0	99	FTSQDASTPASSELNKQEK	Deamidated(N)@15	missed K-Q@16	0.0018	2067.96	3	15	1.1.1.1147.18	Winner
0	99	FTSQDASTPASSELNKQEK	Deamidated(N)@15	missed K-Q@16	0.0018	2067.96	3	21	1.1.1.1137.17	Winner
0	99	GSEQTTGAENEVETNALPVVSK	Deamidated(N)@15		-0.0008	2260.07	2	19	1.1.1.1457.9	Winner
0	99	GSEQTTGAENEVETNALPVVSK	Deamidated(N)@15		-0.0008	2260.07	3	30	1.1.1.1469.3	Winner
0	99	GSEQTTGAENEVETNALPVVSK	Deamidated(N)@15		-0.0008	2260.07	3	31	1.1.1.1463.5	Winner
0	99	GSEQTTGAENEVETNALPVVSK	Deamidated(N)@15		-0.0008	2260.07	2	17	1.1.1.1466.14	Winner
0	99	GSEQTTGAENEVETNALPVVSK	Deamidated(N)@15		-0.0008	2260.07	2	19	1.1.1.1464.15	Winner
0	99	GSEQTTGAENEVETNALPVVSK	Deamidated(N)@15		-0.0006	2260.07	3	25	1.1.1.1475.3	Winner
0	99	GSEQTTGAENEVETNALPVVSK	Deamidated(N)@15		-0.0008	2260.07	2	14	1.1.1.1470.16	Winner
0	99	GSEQTTGAENEVETNALPVVSK	Deamidated(N)@15		0.0039	2260.08	2	18	1.1.1.1384.21	Winner
0	99	GSEQTTGAENEVETNALPVVSK	Deamidated(N)@15		0.0039	2260.08	2	18	1.1.1.1392.16	Winner
0	99	GSEQTTGAENEVETNALPVVSK	Deamidated(N)@15		0.0039	2260.08	2	20	1.1.1.1385.21	Winner
0	99	GSEQTTGAENEVETNALPVVSK	Deamidated(N)@15		0.0041	2260.08	2	14	1.1.1.1396.16	Winner
0	99	GSEQTTGAENEVETNALPVVSK	Deamidated(N)@15		0.0039	2260.08	2	16	1.1.1.1391.21	Winner
0	99	GSEQTTGAENEVETNALPVVSK	Deamidated(N)@15		0.0039	2260.08	2	18	1.1.1.1393.16	Winner
0	99	GSEQTTGAENEVETNALPVVSK	Deamidated(N)@15		0.0039	2260.08	2	22	1.1.1.1390.11	Winner
0	99	GSEQTTGAENEVETNALPVVSK	Deamidated(N)@15		0.0039	2260.08	2	18	1.1.1.1389.21	Winner
0	99	GSEQTTGAENEVETNALPVVSK	Deamidated(N)@15		0.0039	2260.08	2	21	1.1.1.1386.14	Winner
0	99	GSEQTTGAENEVETNALPVVSK	Deamidated(N)@15		0.0039	2260.08	2	21	1.1.1.1382.17	Winner
0	99	GSEQTTGAENEVETNALPVVSK	Deamidated(N)@15		0.0012	2260.07	3	21	1.1.1.1406.10	Winner
0	99	GSEQTTGAENEVETNALPVVSK	Deamidated(N)@15		0.001	2260.07	3	28	1.1.1.1388.18	Winner
0	99	GSEQTTGAENEVETNALPVVSK	Deamidated(N)@15		0.0039	2260.08	2	19	1.1.1.1381.12	Winner
0	99	GSEQTTGAENEVETNALPVVSK	Deamidated(N)@15		0.0039	2260.08	2	16	1.1.1.1395.20	Winner
0	99	GSEQTTGAENEVETNALPVVSK	Deamidated(N)@15		0.001	2260.07	3	29	1.1.1.1383.15	Winner
0	99	GSEQTTGAENEVETNALPVVSK	Deamidated(N)@15		0.0003	2260.07	3	26	1.1.1.1401.11	Winner
0	99	GSEQTTGAENEVETNALPVVSK	Deamidated(N)@15		0.0003	2260.07	3	17	1.1.1.1482.10	Winner
0	99	GSEQTTGAENEVETNALPVVSK	Deamidated(N)@15		0.001	2260.07	3	24	1.1.1.1394.16	Winner
0	99	MGYFPTEEKSETDENSGK	Deamidated(N)@15	missed K-S@9	0.0124	2048.86	3	16	1.1.1.1246.13	Winner
0	92.8	FTSQDASTPASSELNKQEK	Deamidated(N)@15	missed K-Q@16	0.0018	2067.96	3	11	1.1.1.1087.21	Winner
0	86.9	FTSQDASTPASSELNKQEK	Deamidated(N)@15	missed K-Q@16	0.0007	2067.96	3	8	1.1.1.1152.18	Winner
0	94.3	GSEQTTGAENEVETNALPVVSK	Deamidated(N)@15; Oxidation(P)@18		0.0474	2276.11	3	14	1.1.1.1430.8	Winner
0	90	GSEQTTGAENEVETNALPVVSK	Deamidated(N)@15; Oxidation(P)@18		0.0474	2276.11	3	13	1.1.1.1425.15	Winner
0	99	LGADEDSFVILEPETNRELEALK	Deamidated(N)@16	missed R-E@17	0.0032	2588.29	3	19	1.1.1.1833.9	Winner
0	99	LGADEDSFVILEPETNRELEALK	Deamidated(N)@16	missed R-E@17	0.0032	2588.29	3	31	1.1.1.1895.5	Winner
0	99	LGADEDSFVILEPETNRELEALK	Deamidated(N)@16	missed R-E@17	0.0032	2588.29	3	26	1.1.1.1828.8	Winner
0	99	LGADEDSFVILEPETNRELEALK	Deamidated(N)@16	missed R-E@17	0.0032	2588.29	3	25	1.1.1.1900.7	Winner
0	99	LGADEDSFVILEPETNRELEALK	Deamidated(N)@16	missed R-E@17	0.0032	2588.29	3	22	1.1.1.1905.8	Winner
0	99	LGADEDSFVILEPETNRELEALK	Deamidated(N)@16	missed R-E@17	0.0032	2588.29	3	23	1.1.1.1823.6	Winner
0	99	LGADEDSFVILEPETNRELEALK	Deamidated(N)@16	missed R-E@17	0.0032	2588.29	3	13	1.1.1.1890.7	Winner
0	99	LSEPSLPIEDSQDLYNASPEPK	Deamidated(N)@16		0	2429.15	3	22	1.1.1.1705.11	Winner
0	99	LSEPSLPIEDSQDLYNASPEPK	Deamidated(N)@16		0.0047	2429.15	3	25	1.1.1.1657.11	Winner
0	99	LSEPSLPIEDSQDLYNASPEPK	Deamidated(N)@16		0.0047	2429.15	3	29	1.1.1.1662.15	Winner
0	99	LSEPSLPIEDSQDLYNASPEPK	Deamidated(N)@16		0.0052	2429.15	2	14	1.1.1.1702.11	Winner
0	99	LSEPSLPIEDSQDLYNASPEPK	Deamidated(N)@16		0.0047	2429.15	3	18	1.1.1.1663.12	Winner
0	99	LSEPSLPIEDSQDLYNASPEPK	Deamidated(N)@16		0.0047	2429.15	3	24	1.1.1.1667.11	Winner
0	99	LSEPSLPIEDSQDLYNASPEPK	Deamidated(N)@16		0.0052	2429.15	2	13	1.1.1.1707.18	Winner
0	99	LSEPSLPIEDSQDLYNASPEPK	Deamidated(N)@16		0.0106	2429.16	2	13	1.1.1.1665.10	Winner
0	99	LSEPSLPIEDSQDLYNASPEPK	Deamidated(N)@16		0.0106	2429.16	2	12	1.1.1.1659.10	Winner
0	99	LSEPSLPIEDSQDLYNASPEPK	Deamidated(N)@16		0.0106	2429.16	2	9	1.1.1.1666.12	Winner
0	99	LSEPSLPIEDSQDLYNASPEPK	Deamidated(N)@16		0.0106	2429.16	2	11	1.1.1.1661.11	Winner
0	99	LSEPSLPIEDSQDLYNASPEPK	Deamidated(N)@16		0.0077	2429.16	2	9	1.1.1.1669.16	Winner
0	99	LSEPSLPIEDSQDLYNASPEPK	Deamidated(N)@16		0.0106	2429.16	2	14	1.1.1.1664.11	Winner
0	99	LSEPSLPIEDSQDLYNASPEPK	Deamidated(N)@16		0.0106	2429.16	2	11	1.1.1.1660.11	Winner
0	80.1	LSEPSLPIEDSQDLYNASPEPK	Deamidated(N)@16		0.0106	2429.16	2	10	1.1.1.1663.16	Winner
0	14.9	LSEPSLPIEDSQDLYNASPEPK	Deamidated(N)@16		0.0077	2429.16	2	7	1.1.1.1668.12	Winner
0	99	DLVKNEELEIQEK	Deamidated(N)@5	missed K-N@4	0.0045	1586.81	3	14	1.1.1.1390.3	Winner
0	99	DLVKNEELEIQEK	Deamidated(N)@5	missed K-N@4	0.0009	1586.8	3	19	1.1.1.1410.6	Winner
0	99	DLVKNEELEIQEK	Deamidated(N)@5	missed K-N@4	0.0009	1586.8	3	12	1.1.1.1420.3	Winner
0	99	DLVKNEELEIQEK	Deamidated(N)@5	missed K-N@4	0.0009	1586.8	3	15	1.1.1.1415.4	Winner
0	99	DLVKNEELEIQEK	Deamidated(N)@5	missed K-N@4	-0.0011	1586.8	3	17	1.1.1.1326.5	Winner
0	99	DLVKNEELEIQEK	Deamidated(N)@5	missed K-N@4	-0.0011	1586.8	3	14	1.1.1.1336.8	Winner
0	99	DLVKNEELEIQEK	Deamidated(N)@5	missed K-N@4	-0.0011	1586.8	3	18	1.1.1.1321.5	Winner
0	99	DLVKNEELEIQEK	Deamidated(N)@5	missed K-N@4	-0.0011	1586.8	3	19	1.1.1.1331.6	Winner
0	99	DLVKNEELEIQEK	Deamidated(N)@5	missed K-N@4	-0.0004	1586.8	2	16	1.1.1.1328.19	Winner
0	96.6	DLVKNEELEIQEK	Deamidated(N)@5	missed K-N@4	-0.0004	1586.8	2	9	1.1.1.1330.12	Winner
0	95.2	DLVKNEELEIQEK	Deamidated(N)@5	missed K-N@4	-0.0013	1586.8	3	9	1.1.1.1316.9	Winner
0	53.4	ESALNLPYHMPENK	Deamidated(N)@5		0.002	1642.77	3	10	1.1.1.1490.6	Winner
0	15.5	ESALNLPYHMPENK	Deamidated(N)@5		0.002	1642.77	3	9	1.1.1.1484.5	Winner
0	88	ESALNLPYHMPENK	Deamidated(N)@5; Oxidation(M)@10		0.0004	1658.76	3	11	1.1.1.1327.12	Winner
0	99	AGQTVNVNVIVK	Deamidated(N)@6		0.0005	1241.7	2	12	1.1.1.1348.18	Winner
0	99	AGQTVNVNVIVK	Deamidated(N)@6		0.0005	1241.7	2	14	1.1.1.1354.14	Winner
0	99	TGSLLNQPK	Deamidated(N)@6		0.0006	957.514	2	12	1.1.1.1092.7	Winner
0	99	TGSLLNQPK	Deamidated(N)@6		0.0006	957.514	2	13	1.1.1.1066.7	Winner
0	99	TGSLLNQPK	Deamidated(N)@6		0.0022	957.515	2	12	1.1.1.1060.5	Winner
0	96.7	TGSLLNQPK	Deamidated(N)@6		0.0006	957.514	2	11	1.1.1.1072.12	Winner
0	83.4	AGQTVNVNVIVK	Deamidated(N)@6		-0.0013	1241.7	2	7	1.1.1.1392.11	Winner
0	83	TGSLLNQPK	Deamidated(N)@6		0.0006	957.514	2	8	1.1.1.1097.8	Winner
0	48.6	AGQTVNVNVIVK	Deamidated(N)@6		0.0053	1241.7	2	7	1.1.1.1376.12	Winner
0	99	SETDENSGKQPSKLDEDDSCSLLTK	Deamidated(N)@6; Propionamide(C)@20	missed K-Q@9; missed K-L@13	0.0102	2797.25	4	12	1.1.1.1257.21	Winner
0	99	SETDENSGKQPSKLDEDDSCSLLTK	Deamidated(N)@6; Propionamide(C)@20	missed K-Q@9; missed K-L@13	0.0102	2797.25	4	11	1.1.1.1262.21	Winner
0	99	SETDENSGKQPSKLDEDDSCSLLTK	Deamidated(N)@6; Propionamide(C)@20	missed K-Q@9; missed K-L@13	0.0058	2797.25	4	16	1.1.1.1251.9	Winner
0	99	SETDENSGKQPSKLDEDDSCSLLTK	Deamidated(N)@6; Propionamide(C)@20	missed K-Q@9; missed K-L@13	0.0102	2797.25	4	12	1.1.1.1267.15	Winner
0	99	SETDENSGKQPSKLDEDDSCSLLTK	Deamidated(N)@6; Trioxidation(C)@20	missed K-Q@9; missed K-L@13	0.0116	2774.2	3	12	1.1.1.1252.12	Winner
0	99	SETDENSGKQPSKLDEDDSCSLLTK	Deamidated(N)@6; Trioxidation(C)@20	missed K-Q@9; missed K-L@13	0.0116	2774.2	3	13	1.1.1.1246.14	Winner
0	98.8	EMDKENNDGSSEIGK	Deamidated(N)@7	missed K-E@4	0.0026	1652.69	3	13	1.1.1.895.4	Winner
0	84	EIIDTANTTEMNSDHHSK	Deamidated(N)@7		0.001	2042.89	4	11	1.1.1.1101.12	Winner
0	99	EIIDTANTTEMNSDHHSK	Deamidated(N)@7; Oxidation(M)@11		-0.0031	2058.88	3	18	1.1.1.996.15	Winner
0	98.5	EIIDTANTTEMNSDHHSK	Deamidated(N)@7; Oxidation(M)@11		-0.0013	2058.88	4	13	1.1.1.1000.10	Winner
0	97.5	EIIDTANTTEMNSDHHSK	Deamidated(N)@7; Oxidation(M)@11		-0.0031	2058.88	3	12	1.1.1.1001.16	Winner
0	72	EIIDTANTTEMNSDHHSK	Deamidated(N)@7; Oxidation(M)@11		-0.0031	2058.88	3	10	1.1.1.1002.12	Winner
2	99	AGQTVNVNVIVK	Deamidated(N)@8		-0.0011	1241.7	2	12	1.1.1.1311.15	Winner
0	99	AGQTVNVNVIVK	Deamidated(N)@8		0.002	1241.7	2	13	1.1.1.1273.11	Winner
0	99	AGQTVNVNVIVK	Deamidated(N)@8		0.002	1241.7	2	14	1.1.1.1268.14	Winner
0	99	LAALSDHNPSAPR	Deamidated(N)@8		0.0031	1348.68	3	15	1.1.1.1090.5	Winner
0	98.9	AGQTVNVNVIVK	Deamidated(N)@8		-0.0011	1241.7	2	12	1.1.1.1316.14	Winner
0	98.9	LAALSDHNPSAPR	Deamidated(N)@8		0.02	1348.69	3	13	1.1.1.1056.3	Winner
0	95.6	AGQTVNVNVIVK	Deamidated(N)@8		-0.0011	1241.7	2	10	1.1.1.1321.12	Winner
0	95.1	AGQTVNVNVIVK	Deamidated(N)@8		0.002	1241.7	2	10	1.1.1.1263.12	Winner
0	51	AGQTVNVNVIVK	Deamidated(N)@8		-0.0013	1241.7	2	9	1.1.1.1386.10	Winner
0	16	AGQTVNVNVIVK	Deamidated(N)@8		0.0025	1241.7	2	8	1.1.1.1381.10	Winner
0	99	DLVKNEELEIQEK	Deamidated(Q)@11	missed K-N@4	0.0051	1586.81	3	15	1.1.1.1398.12	Winner
0	99	DLVKNEELEIQEK	Deamidated(Q)@11	missed K-N@4	0.0009	1586.8	3	17	1.1.1.1405.6	Winner
0	99	DLVKNEELEIQEK	Deamidated(Q)@11	missed K-N@4	-0.0003	1586.8	2	18	1.1.1.1400.15	Winner
0	14.9	DLVKNEELEIQEK	Deamidated(Q)@11	missed K-N@4	0	1586.8	2	6	1.1.1.1395.19	Winner
0	99	LSEPSLPIEDSQDLYNASPEPK	Deamidated(Q)@12		0	2429.15	3	15	1.1.1.1712.17	Winner
0	99	LSEPSLPIEDSQDLYNASPEPK	Deamidated(Q)@12		0	2429.15	3	23	1.1.1.1707.13	Winner
0	99	NPFEAIRPGSAQQVK	Deamidated(Q)@12		0.0001	1641.85	2	16	1.1.1.1331.13	Winner
0	99	NPFEAIRPGSAQQVK	Deamidated(Q)@12		0.0001	1641.85	2	15	1.1.1.1322.21	Winner
0	99	NPFEAIRPGSAQQVK	Deamidated(Q)@12		0.0001	1641.85	2	13	1.1.1.1334.14	Winner
0	99	NPFEAIRPGSAQQVK	Deamidated(Q)@13		0.0001	1641.85	3	15	1.1.1.1322.12	Winner
0	98.7	NPFEAIRPGSAQQVK	Deamidated(Q)@13		0.0001	1641.85	3	13	1.1.1.1327.10	Winner
0	98.7	NPFEAIRPGSAQQVK	Deamidated(Q)@13		0.0001	1641.85	3	13	1.1.1.1332.6	Winner
0	86.8	NPFEAIRPGSAQQVK	Deamidated(Q)@13		-0.0004	1641.85	3	11	1.1.1.1337.6	Winner
0	85.5	NPFEAIRPGSAQQVK	Deamidated(Q)@13		0.0001	1641.85	3	11	1.1.1.1319.10	Winner
0	99	FTSQDASTPASSELNKQEK	Deamidated(Q)@17	missed K-Q@16	0.0018	2067.96	3	20	1.1.1.1142.20	Winner
2	99	ALEGEGPQNPEETDEKVEEPEQQNK	Deamidated(Q)@22	cleaved H-A@N-term; missed K-V@16	0.0128	2824.27	3	25	1.1.1.1186.8	Winner
0	51.5	ETQIITGSDESCRK	Deamidated(Q)@3; Cys->Dha(C)@12	missed R-K@13	-0.0019	1532.73	3	9	1.1.1.995.7	Winner
0	99	ETQIITGSDESCR	Deamidated(Q)@3; Propionamide(C)@12		0.006	1509.67	2	12	1.1.1.1109.18	Winner
0	99	ETQIITGSDESCRK	Deamidated(Q)@3; Propionamide(C)@12	missed R-K@13	0.0001	1637.76	3	12	1.1.1.1010.13	Winner
0	99	FTSQDASTPASSELNK	Deamidated(Q)@4		0.0039	1682.77	2	14	1.1.1.1171.20	Winner
0	99	FTSQDASTPASSELNKQEK	Deamidated(Q)@4	missed K-Q@16	0.0016	2067.96	3	16	1.1.1.1127.17	Winner
0	99	GSEQTTGAENEVETNALPVVSK	Deamidated(Q)@4		0.0005	2260.07	2	21	1.1.1.1446.18	Winner
0	99	NQYQALKPR	Deamidated(Q)@4		-0.0015	1117.59	2	13	1.1.1.989.13	Winner
0	98.7	NQYQALKPR	Deamidated(Q)@4		-0.0015	1117.59	2	11	1.1.1.994.8	Winner
0.17	77.5	AKLQEAMK	Deamidated(Q)@4	missed K-L@2	-0.0014	918.483	2	7	1.1.1.861.4	Winner
0	12.2	FTSQDASTPASSELNK	Deamidated(Q)@4		0.0105	1682.77	3	9	1.1.1.1159.10	Winner
0.21	81.2	EALKQLHSETQR	Deamidated(Q)@5	missed K-Q@4	-0.0018	1439.74	3	8	1.1.1.988.9	Winner
0	99	TGSLLNQPK	Deamidated(Q)@7		0.0006	957.514	2	13	1.1.1.1082.9	Winner
0	99	TGSLLNQPK	Deamidated(Q)@7		0.0004	957.514	2	12	1.1.1.1087.9	Winner
0	97.6	TGSLLNQPK	Deamidated(Q)@7		0.0006	957.514	2	12	1.1.1.1077.9	Winner
0.22	82.7	ELEALKQR	Deamidated(Q)@7	missed K-Q@6	-0.0021	986.538	2	7	1.1.1.997.6	Winner
0	9.5	TGSLLNQPK	Deamidated(Q)@7		0.0178	957.531	2	6	1.1.1.1121.8	Winner
0	5.7	ELEALKQR	Deamidated(Q)@7	missed K-Q@6	-0.0021	986.538	2	5	1.1.1.992.9	Winner
0	99	NIDDASQMDLFHR	Deamidated(Q)@7; Oxidation(M)@8		0.0069	1577.68	3	10	1.1.1.1366.9	Winner
0	92.8	NASRPMVIQESK	Deamidated(Q)@9		-0.0005	1359.68	3	10	1.1.1.1003.5	Winner
[truncated: 2,067 more rows]
