# Supplementary material for: Cdc7 activates replication checkpoint by phosphorylating the Chk1-binding domain of Claspin in human cells
Source: eLife. 2019 Dec 31;8:e50796. doi: 10.7554/eLife.50796 (PMC6996922; doi:10.7554/eLife.50796)
Supplement: Figure 5—figure supplement 2—source data 1. [file elife-50796-fig5-figsupp2-data1.xlsx]

## Sheet: Sheet1
4090	3184	4027	3876
4771	3816	5239	4281
2684	2163	2915	2877
3848.33	3054.33	4060.33	3678
1064.28	834.094	1162.36	722.639
