# Supplementary material for: Cdc7 activates replication checkpoint by phosphorylating the Chk1-binding domain of Claspin in human cells
Source: eLife. 2019 Dec 31;8:e50796. doi: 10.7554/eLife.50796 (PMC6996922; doi:10.7554/eLife.50796)
Supplement: Figure 5—figure supplement 3—source data 1. [file elife-50796-fig5-figsupp3-data1.xlsx]

## Sheet: 工作表1
	ne	po	rpo
1	0.904	0.031	3.31551		3.31551	2.12089	5.09014	3.50885	1.49404
2	0.541	0.215	28.4392		28.4392	19.0303	32.987	26.8188	7.11804
3	0.606	0.197	24.533		24.533	15.5556	29.4479	23.1788	7.04446
4	0.583	0.24	29.1616		29.1616	18.4242	32.7654	26.7837	7.46042
5	0.854	0.019	2.1764		2.1764	2.08791	3.50282	2.58905	0.792591
6	0.283	0.168	37.2506		37.2506	20	41.0367	32.7624	11.2135
7	0.63	0.171	21.3483		21.3483	13.5198	25.3988	20.089	6.03878
8	0.475	0.223	31.9484		31.9484	19.3095	36.0955	29.1178	8.74369
9	0.592	0.059	9.06298		9.06298	7.86667	18.806	11.9119	6.00035
10	0.283	0.266	48.4517		48.4517	52.3397	48.4517	49.7477	2.24471
11	0.422	0.135	24.237		24.237	27.5568	29.7909	27.1949	2.79461
12	0.348	0.25	41.806		41.806	47.557	47.557	45.64	3.32033
	ne	po	rpo
1	0.923	0.02	2.12089
2	0.668	0.157	19.0303
3	0.722	0.133	15.5556
4	0.673	0.152	18.4242
5	0.891	0.019	2.08791
6	0.464	0.116	20
7	0.742	0.116	13.5198
8	0.631	0.151	19.3095
9	0.691	0.059	7.86667
10	0.275	0.302	52.3397
11	0.51	0.194	27.5568
12	0.322	0.292	47.557
	ne	po	rpo
1	0.895	0.048	5.09014
2	0.516	0.254	32.987
3	0.575	0.24	29.4479
4	0.513	0.25	32.7654
5	0.854	0.031	3.50282
6	0.273	0.19	41.0367
7	0.608	0.207	25.3988
8	0.455	0.257	36.0955
9	0.544	0.126	18.806
10	0.283	0.266	48.4517
11	0.403	0.171	29.7909
12	0.322	0.292	47.557
