# Supplementary material for: Cdc7 activates replication checkpoint by phosphorylating the Chk1-binding domain of Claspin in human cells
Source: eLife. 2019 Dec 31;8:e50796. doi: 10.7554/eLife.50796 (PMC6996922; doi:10.7554/eLife.50796)
Supplement: Figure 6—source data 1. [file elife-50796-fig6-data1.xlsx]

## Sheet: 工作表1
1	1	~	1		5860.83	106.47	5460.76		55.05		4497.6	4979.18	681.057
1	2	~	2		5171.62	100.89	4792.52		51.26		3833.2	4312.86	678.342
1	3	~	3		5586.04	99.75	5211.23		56		3898	4554.61	928.594
1	4	~	4		3462.97	89.57	3126.41		38.66		2684.3	2905.36	312.619
1	5	~	5		1395.72	80.85	1091.92		17.26		849	970.46	171.77
1	6	~	6		1755.8	84.15	1439.61		20.87		1342.2	1390.9	68.8793
1	7	~	7		2194.82	81.83	1887.34		26.82		1655	1771.17	164.289
1	8	~	8		2948.78	83.19	2636.19		35.45		2603.8	2619.99	22.9032
1	9	~	9		1533.88	98.61	1163.35		15.56		1066.3	1114.82	68.6247
1	10	~	10		1208.43	83.19	895.84		14.53		795	845.42	71.3046
1	11	~	11		1567.61	83.19	1255.02		18.84		821.2	1038.11	306.757
1	12	~	12		2602.09	93.81	2249.6		27.74		2035.5	2142.55	151.392
1	13	~	13		3840.21	83.19	3527.63		46.16		4160.7	3844.16	447.648
1	14	~	14		6695.4	83.19	6382.81		80.48		6331.7	6357.26	36.1402
1	15	~	15		3031.95	83.19	2719.37		36.45		2922.5	2820.93	143.635
1	16	~	16		1627.86	94.05	1274.47		17.31		1197.6	1236.04	54.3553
1	17	~	17		2769.41	83.19	2456.82		33.29		2171.5	2314.16	201.752
1	18	~	18		4286.76	83.19	3974.18		51.53		4803.1	4388.64	586.135
1	19	~	19		1630.09	83.19	1317.5		19.59		1204.1	1260.8	80.1859
1	20	~	20		2624.94	83.19	2312.35		31.55		2974.3	2643.32	468.069
1	21	~	21		11142.7	122.13	10683.8		91.24		9892.5	10288.2	559.541
1	22	~	22		3818.11	83.19	3505.53		45.9		3096.4	3300.97	289.299
1	23	~	23		17693.2	165.11	17072.8		107.16		15031.9	16052.4	1443.13
1	24	~	24		316.19	84.15	0	B	3.76		0	0	0
