# Supplementary material for: Cdc7 activates replication checkpoint by phosphorylating the Chk1-binding domain of Claspin in human cells
Source: eLife. 2019 Dec 31;8:e50796. doi: 10.7554/eLife.50796 (PMC6996922; doi:10.7554/eLife.50796)
Supplement: Figure 7—source data 1. [file elife-50796-fig7-data1.xlsx]

## Sheet: 工作表1
Channel	No	Group	Index	Name	AU	Area(mm2)	AU-BG	B	AU/mm2	(A-B)/mm2	Calibrated
1	1	~	1		545777258	61.7	290697032		8.84523e+06	4.71123e+06	-------	1		1	0
1	2	~	2		503840174	61.7	248759948		8.16557e+06	4.03157e+06	-------	0.855736		0.751317	0.0907694
1	3	~	3		546170871	61.7	291090645		8.85161e+06	4.71761e+06	-------	1.00135		0.903866	0.121666
1	4	~	4		380932604	61.7	125852378		6.17365e+06	2.03965e+06	-------	0.432933		0.391242	0.0667098
1	5	~	5		398543849	61.7	143463623		6.45907e+06	2.32507e+06	-------	1		1	0
1	6	~	6		325117712	61.7	70037486		5.26908e+06	1.13507e+06	-------	0.48819		0.398696	0.124616
1	7	~	7		310108094	61.7	55027868		5.02582e+06	891819	-------	0.383567		0.272803	0.0998915
1	8	~	8		295369877	61.7	40289651		4.78696e+06	652961	-------	0.280835		0.142063	0.121557
1	9	~	9		255080226	61.7	0	B	4.134e+06	0	-------
Channel	No	Group	Index	Name	AU	Area(mm2)	AU-BG	B	AU/mm2	(A-B)/mm2	Calibrated
1	1	A	1		3251984	9.15	1962380		355540	214547	-------	1
1	2	A	2		2646128	9.15	1356524		289302	148309	-------	0.691265
1	3	A	3		3310749	9.15	2021145		361965	220972	-------	1.02995
1	4	A	4		1906383	9.15	616779		208425	67432.6	-------	0.314302
1	5	A	5		2320813	9.15	1031209		253735	112742	-------	1
1	6	A	6		1553971	9.15	264367		169896	28903.3	-------	0.256366
1	7	A	7		1485068	9.15	195464		162363	21370.1	-------	0.189548
1	8	A	8		1383362	9.15	93758		151243	10250.6	-------	0.0909205
1	9	A	9		1289604	9.15	0	B	140993	0	-------
1	10	B	1		2932366	9.15	1556930		320596	170219	-------	1
1	11	B	2		2476106	9.15	1100670		270713	120336	-------	0.706949
1	12	B	3		2630909	9.15	1255473		287638	137261	-------	0.806377
1	13	B	4		2039451	9.15	664015		222974	72596.9	-------	0.42649
1	14	B	5		2420977	9.15	1045541		264686	114309	-------	1
1	15	B	6		1847530	9.15	472094		201991	51614.1	-------	0.451531
1	16	B	7		1631902	9.15	256466		178416	28039.5	-------	0.245295
1	17	B	8		1432348	9.15	56912		156599	6222.2	-------	0.0544331
1	18	B	9		1375436	9.15	0	B	150377	0	-------
