# Supplementary material for: Cdc7 activates replication checkpoint by phosphorylating the Chk1-binding domain of Claspin in human cells
Source: eLife. 2019 Dec 31;8:e50796. doi: 10.7554/eLife.50796 (PMC6996922; doi:10.7554/eLife.50796)
Supplement: Figure 7—source data 2. [file elife-50796-fig7-data2.xlsx]

## Sheet: 工作表1
Channel	No	Group	Index	Name	AU	Area(mm2)	AU-BG	B	AU/mm2	(A-B)/mm2	Calibrated
1	1	~	1		2711209	10.4	1407916		260586	135321	-------		1		1	0
1	2	~	2		2044478	10.4	741185		196504	71238.6	-------		0.526441		0.688467	0.143493
1	3	~	3		1514624	10.4	211331		145577	20312	-------		0.150102		0.280433	0.173406
1	4	~	4		1383726	10.4	80433		132996	7730.77	-------		0.0571291		0.242851	0.207372
1	5	~	5		3012029	10.4	1708736		289500	164234	-------		1		1	0
1	6	~	6		1822740	10.4	519447		175192	49926.4	-------		0.303995		0.45083	0.165756
1	7	~	7		1694529	10.4	391236		162869	37603.4	-------		0.228962		0.339218	0.196282
1	8	~	8		1363327	10.4	60034		131035	5770.14	-------		0.0351336		0.0304856	0.0155954
1	9	~	9		1303293	10.4	0	B	125265	0	-------
Channel	No	Group	Index	Name	AU	Area(mm2)	AU-BG	B	AU/mm2	(A-B)/mm2	Calibrated
1	1	A	1		3567591	9.6	768726		371472	80042.8	-------		1
1	2	A	2		3367309	9.6	568444		350618	59188.7	-------		0.739462
1	3	A	3		2963337	9.6	164472		308554	17125.5	-------		0.213954
1	4	A	4		3148392	9.6	349527		327823	16394.2	-------		0.204817
1	5	A	5		4878944	9.6	2080079		508015	216586	-------		1
1	6	A	6		4110501	9.6	1311636		428002	136573	-------		0.63057
1	7	A	7		3975851	9.6	1176986		413982	122552	-------		0.565837
1	8	A	8		3402339	9.6	603474		354265	2836.13	-------		0.0130947
1	9	A	9		2798865	9.6	0	B	291429	0	-------
1	10	B	1		4884289	8.96	3119328		545362	348293	-------		1
1	11	B	2		4258853	8.96	2493892		475528	278459	-------		0.799497
1	12	B	3		3253635	8.96	1488674		363289	166220	-------		0.477242
1	13	B	4		3220462	8.96	1455501		359585	162516	-------		0.466607
1	14	B	5		4654710	10	2.68321e+06		465280	268211	-------		1
1	15	B	6		2768861	8.96	1003900		309161	112092	-------		0.417924
1	16	B	7		2300280	8.96	535319		256841	59771.8	-------		0.222853
1	17	B	8		1868801	8.96	103840		208664	11594.4	-------		0.0432286
1	18	B	9		1764961	8.96	0	B	197069	0	-------
